# Supplementary material for: Brain region-resolved pharmacodynamics of a human SNCA 3′UTR-targeting antisense oligonucleotide in BAC-hSNCA rats
Source: Research Square preprint supplement (doi:10.21203/rs.3.rs-8521036/v1), 2026-01-21
Supplement: Supplementary file 1 [file bdd4a3be00f0cc3581cd5ed0.xlsx]

## Sheet: Table title
Data S1. Differentially expressed transcripts following SNCA ASO3.0 delivery in homozygous BAC-hSNCA rats.

## Sheet: Olfactory Bulb Scr1 vs ASO3
	Transcript stable ID	logFC	logCPM	LR	PValue	FDR	Gene name	Gene stable ID
16506	ENSRNOT00000108494	1.64211	6.86444	84.9973	2.98766e-20	5.89974e-16	Actg1	ENSRNOG00000036701
15397	ENSRNOT00000104512	-0.914898	9.51016	58.3125	2.23613e-14	2.20785e-10	Mobp	ENSRNOG00000018700
16125	ENSRNOT00000107098	-0.904645	10.4706	49.1818	2.333e-12	1.53566e-08	Mbp	ENSRNOG00000016516
16560	ENSRNOT00000108705	-1.61474	5.08491	46.6748	8.37983e-12	4.13691e-08	Hectd1	ENSRNOG00000006905
15973	ENSRNOT00000106521	-2.33879	3.48528	45.0666	1.90447e-11	7.52151e-08	Gpr146	ENSRNOG00000001288
5368	ENSRNOT00000026316	-1.40961	5.86585	43.8531	3.53967e-11	1.16496e-07	Pc	ENSRNOG00000019372
13389	ENSRNOT00000097138	1.18876	5.94722	43.0253	5.40376e-11	1.5244e-07	Hexb	ENSRNOG00000025274
436	ENSRNOT00000002169	1.47971	5.50305	42.0924	8.706e-11	2.10586e-07	Cct8	ENSRNOG00000001592
5083	ENSRNOT00000025164	2.37225	3.53559	41.9017	9.59778e-11	2.10586e-07	Mppe1	ENSRNOG00000018648
5737	ENSRNOT00000027760	1.45458	6.02903	41.3627	1.26446e-10	2.49692e-07	Cd81	ENSRNOG00000020451
13686	ENSRNOT00000098266	-2.16568	4.13594	41.047	1.48613e-10	2.66788e-07	Add1	ENSRNOG00000013039
1181	ENSRNOT00000006005	-2.47873	3.8853	39.7049	2.9538e-10	4.86073e-07	Dcaf5	ENSRNOG00000004556
12992	ENSRNOT00000095813	1.58489	4.49352	39.2514	3.72601e-10	5.65981e-07	Reep1	ENSRNOG00000008481
3385	ENSRNOT00000017211	1.31399	4.82064	38.6731	5.01071e-10	7.06761e-07	Tm9sf2	ENSRNOG00000012751
3942	ENSRNOT00000019824	3.0533	4.82877	38.1073	6.69585e-10	8.81487e-07	Dhx36	ENSRNOG00000014599
4066	ENSRNOT00000020428	-1.34812	5.34163	37.4359	9.44692e-10	1.16593e-06	Dmpk	ENSRNOG00000015085
9508	ENSRNOT00000073000	-1.31893	6.48334	37.1174	1.1123e-09	1.29203e-06	Slc25a23	ENSRNOG00000047781
15474	ENSRNOT00000104763	-1.45493	4.61607	36.3632	1.63769e-09	1.79663e-06	LOC108348180	ENSRNOG00000002100
10679	ENSRNOT00000081409	2.46129	3.27758	35.7152	2.2837e-09	2.37348e-06	Ncor1	ENSRNOG00000055246
9662	ENSRNOT00000074325	-1.06197	9.97239	35.4819	2.57436e-09	2.54179e-06	AABR07000398.1	ENSRNOG00000047746
18539	ENSRNOT00000115881	-1.17853	6.57309	33.8779	5.8681e-09	5.51797e-06	Tecr	ENSRNOG00000021808
14061	ENSRNOT00000099648	-1.09451	5.92241	32.6551	1.10048e-08	9.87781e-06	C1h19orf81	ENSRNOG00000037298
5108	ENSRNOT00000025279	-1.00319	5.57239	32.469	1.21109e-08	1.0398e-05	Mobp	ENSRNOG00000018700
7158	ENSRNOT00000041241	-0.774919	11.2688	32.1788	1.40618e-08	1.11071e-05	Mt-nd3	ENSRNOG00000033615
7165	ENSRNOT00000041328	1.22316	8.5262	32.1866	1.40053e-08	1.11071e-05	LOC108351137	ENSRNOG00000030963
12336	ENSRNOT00000092663	1.45627	4.17349	31.2965	2.21479e-08	1.68213e-05	Srsf3	ENSRNOG00000000520
12702	ENSRNOT00000094678	1.52188	4.58575	31.1501	2.38826e-08	1.7467e-05	Dcaf5	ENSRNOG00000004556
1604	ENSRNOT00000008459	0.983443	6.18702	31.0325	2.53746e-08	1.78955e-05	Hectd1	ENSRNOG00000006905
1698	ENSRNOT00000008985	1.81681	4.16321	30.6403	3.10569e-08	2.08388e-05	Nell2	ENSRNOG00000006235
7422	ENSRNOT00000044608	1.06923	8.65382	30.6031	3.16586e-08	2.08388e-05	Hspa8	ENSRNOG00000034066
4219	ENSRNOT00000021170	2.25685	2.5622	29.7728	4.85761e-08	3.09429e-05	Cdh2	ENSRNOG00000015602
13086	ENSRNOT00000096111	-1.30872	4.73073	29.7034	5.03475e-08	3.10691e-05	Tnrc6a	ENSRNOG00000024737
4005	ENSRNOT00000020154	-1.61108	4.55413	29.4106	5.85555e-08	3.50393e-05	Zfyve28	ENSRNOG00000014874
17127	ENSRNOT00000110793	-0.800636	9.25171	29.3413	6.06876e-08	3.5247e-05	LOC108351137	ENSRNOG00000018630
12741	ENSRNOT00000094864	-0.868769	7.92874	29.2615	6.32406e-08	3.53698e-05	Pfkp	ENSRNOG00000017163
14923	ENSRNOT00000102800	-1.85412	3.39887	29.2238	6.44813e-08	3.53698e-05	Fmn2	ENSRNOG00000061764
16590	ENSRNOT00000108800	3.61319	8.07038	29.1066	6.85015e-08	3.65594e-05	NA	ENSRNOG00000062930
8125	ENSRNOT00000055801	0.933174	6.0443	28.8391	7.8649e-08	3.98226e-05	Ptpra	ENSRNOG00000021223
16163	ENSRNOT00000107215	-1.53424	3.91374	28.8657	7.75725e-08	3.98226e-05	Zhx2	ENSRNOG00000005417
16479	ENSRNOT00000108411	-1.05823	5.19292	28.1281	1.13544e-07	5.60537e-05	Apoe	ENSRNOG00000018454
9156	ENSRNOT00000068093	2.12629	2.21829	27.9478	1.2463e-07	6.0026e-05	Snrnp27	ENSRNOG00000065135
7720	ENSRNOT00000048726	-0.864724	7.32311	27.7306	1.3944e-07	6.55598e-05	Fau	ENSRNOG00000062652
15547	ENSRNOT00000104999	-1.81583	5.31869	27.6533	1.45124e-07	6.66458e-05	Prkcg	ENSRNOG00000054371
12834	ENSRNOT00000095240	-1.26029	5.3484	27.4932	1.57645e-07	7.07505e-05	Pltp	ENSRNOG00000016488
4475	ENSRNOT00000022419	1.0067	6.90454	27.3079	1.735e-07	7.61356e-05	Tspan3	ENSRNOG00000016474
2148	ENSRNOT00000011307	1.03122	6.48026	27.2176	1.81793e-07	7.67502e-05	Synpr	ENSRNOG00000008203
4371	ENSRNOT00000021921	1.29883	5.39141	27.2083	1.82674e-07	7.67502e-05	Slc12a2	ENSRNOG00000015971
14452	ENSRNOT00000101012	-2.23249	1.70574	26.7096	2.3645e-07	9.72745e-05	Galnt18	ENSRNOG00000017021
10241	ENSRNOT00000078599	-1.19384	5.07695	26.3463	2.8537e-07	0.000115004	Chi3l1	ENSRNOG00000053272
11535	ENSRNOT00000087150	2.65599	4.53035	26.2834	2.94817e-07	0.000116435	Sncg	ENSRNOG00000058006
11008	ENSRNOT00000083705	0.78245	6.53337	26.1607	3.14149e-07	0.000121637	Tubb2b	ENSRNOG00000017445
19102	ENSRNOT00000118005	-0.641243	8.98153	26.0442	3.33696e-07	0.000126721	Snrnp70	ENSRNOG00000020763
7227	ENSRNOT00000042100	-0.724475	7.51397	25.8238	3.7404e-07	0.000139362	Nsmf	ENSRNOG00000008810
11005	ENSRNOT00000083700	-1.10222	5.75091	25.4172	4.61776e-07	0.000167332	Slc2a1	ENSRNOG00000007284
12831	ENSRNOT00000095224	-0.983969	6.38745	25.3994	4.66059e-07	0.000167332	Rpl38-ps9	ENSRNOG00000066047
5208	ENSRNOT00000025669	-0.770757	9.10234	25.2319	5.08342e-07	0.000179254	Mt3	ENSRNOG00000018958
10620	ENSRNOT00000080962	0.888269	6.1379	25.1556	5.28855e-07	0.000180057	Pja2	ENSRNOG00000015528
12310	ENSRNOT00000092482	-1.24771	4.47088	25.167	5.25746e-07	0.000180057	Eif2ak1	ENSRNOG00000001050
7133	ENSRNOT00000040993	-0.557845	13.4567	24.1504	8.90978e-07	0.000298206	Mt-nd2	ENSRNOG00000031033
8485	ENSRNOT00000060757	1.10617	4.65833	24.0632	9.32259e-07	0.000306822	Rmnd1	ENSRNOG00000019501
8973	ENSRNOT00000066723	1.59411	5.14409	23.8096	1.0635e-06	0.000344278	Setd5	ENSRNOG00000007472
18492	ENSRNOT00000115742	-0.845266	5.92762	23.6178	1.17498e-06	0.000374231	Bcas1	ENSRNOG00000012906
6016	ENSRNOT00000028876	1.26773	4.31875	23.4769	1.26424e-06	0.000396268	Smox	ENSRNOG00000021255
11948	ENSRNOT00000090026	1.1521	6.89491	23.3106	1.37836e-06	0.00042529	Gls	ENSRNOG00000056246
15039	ENSRNOT00000103241	1.32867	3.63226	23.0516	1.57711e-06	0.000479127	Cdc42se2-ps1	ENSRNOG00000042449
13385	ENSRNOT00000097120	1.26999	4.56913	22.9063	1.70096e-06	0.000508923	Slmap	ENSRNOG00000011307
7065	ENSRNOT00000040038	-0.59372	12.6817	22.726	1.86821e-06	0.00055062	AY172581.9	ENSRNOG00000030478
2869	ENSRNOT00000014807	-1.19312	4.18998	22.2743	2.36348e-06	0.000686348	Igfbp6	ENSRNOG00000010977
2460	ENSRNOT00000012847	0.924556	5.90156	22.1478	2.52446e-06	0.000722472	Cct4	ENSRNOG00000009642
18891	ENSRNOT00000117212	1.36029	4.35513	22.0644	2.63648e-06	0.000743752	Dpp6	ENSRNOG00000030547
5517	ENSRNOT00000026920	1.07361	5.87304	21.9658	2.77559e-06	0.000771967	Hsp90ab1	ENSRNOG00000019834
9777	ENSRNOT00000075305	1.47273	3.18078	21.9019	2.86956e-06	0.000781804	Chst2	ENSRNOG00000047734
11190	ENSRNOT00000084782	0.860029	5.90999	21.8881	2.89014e-06	0.000781804	Mat2a	ENSRNOG00000013520
7791	ENSRNOT00000049683	-0.531346	14.4745	21.6956	3.19517e-06	0.000848125	Mt-co3	ENSRNOG00000030700
14668	ENSRNOT00000101865	0.918443	5.66022	21.6801	3.22122e-06	0.000848125	Prkar1b	ENSRNOG00000028733
12055	ENSRNOT00000090673	-1.28341	6.96725	21.6422	3.28544e-06	0.000853651	Akap8l	ENSRNOG00000006355
8344	ENSRNOT00000058423	0.841322	6.7214	21.6028	3.35356e-06	0.000860035	Ndufs2	ENSRNOG00000038372
8392	ENSRNOT00000059270	2.57769	4.55745	21.572	3.40792e-06	0.000862771	Clcn4	ENSRNOG00000003533
7334	ENSRNOT00000043693	-0.569187	14.128	21.3736	3.77939e-06	0.000944703	Mt-co2	ENSRNOG00000030371
2065	ENSRNOT00000010885	2.20107	2.80529	21.3378	3.85067e-06	0.00095049	Inpp5b	ENSRNOG00000048506
12366	ENSRNOT00000092910	-0.58334	8.20456	21.2374	4.05771e-06	0.000989229	Atp6v0d1	ENSRNOG00000017235
10954	ENSRNOT00000083387	1.85897	2.78721	21.182	4.17667e-06	0.00100581	Tbc1d5	ENSRNOG00000010637
15566	ENSRNOT00000105075	-1.08635	5.16439	21.1157	4.32361e-06	0.00102865	Ctsa	ENSRNOG00000015857
8233	ENSRNOT00000057062	0.905089	5.64959	21.0751	4.41631e-06	0.0010382	Dclk2	ENSRNOG00000016550
12157	ENSRNOT00000091319	1.85317	1.23635	20.5107	5.92989e-06	0.00137762	RGD1307947	ENSRNOG00000006973
10960	ENSRNOT00000083426	-0.911179	5.40835	20.4617	6.08361e-06	0.00138839	Grm4	ENSRNOG00000000487
19167	ENSRNOT00000118233	-2.05775	1.27237	20.4513	6.11689e-06	0.00138839	Nsd1	ENSRNOG00000016680
8068	ENSRNOT00000055125	1.35048	4.03437	20.3891	6.31899e-06	0.00141797	Strada	ENSRNOG00000008637
15419	ENSRNOT00000104593	0.697879	8.76409	20.0935	7.37474e-06	0.00163628	Psap	ENSRNOG00000000571
12704	ENSRNOT00000094688	1.83804	2.50752	20.0079	7.7122e-06	0.00169214	Fam110b	ENSRNOG00000009114
17303	ENSRNOT00000111350	-1.02385	6.13308	19.9328	8.02116e-06	0.00174059	Rpl37a-ps1	ENSRNOG00000066117
12626	ENSRNOT00000094389	-1.08468	4.07269	19.7848	8.66693e-06	0.00183619	Myo5b	ENSRNOG00000014104
15674	ENSRNOT00000105420	0.767743	7.33804	19.7987	8.60406e-06	0.00183619	Ctss	ENSRNOG00000021157
17814	ENSRNOT00000113305	1.28721	4.01014	19.7686	8.74067e-06	0.00183619	Dmxl1	ENSRNOG00000024671
16639	ENSRNOT00000108973	0.791998	5.40075	19.6697	9.20477e-06	0.0018934	Acsl3	ENSRNOG00000014718
18672	ENSRNOT00000116376	2.17958	1.83357	19.6734	9.18732e-06	0.0018934	Napa	ENSRNOG00000001494
1826	ENSRNOT00000009665	0.767957	6.5588	19.6185	9.45493e-06	0.00192481	Laptm4a	ENSRNOG00000006865
19737	ENSRNOT00000120283	-0.728541	6.44354	19.4401	1.03807e-05	0.0020917	Maz	ENSRNOG00000055082
18545	ENSRNOT00000115896	-1.70658	4.12483	19.2077	1.17241e-05	0.00233854	Podxl2	ENSRNOG00000016255
13734	ENSRNOT00000098451	0.721523	6.49233	19.1679	1.19707e-05	0.00236385	Mat2a	ENSRNOG00000013520
4738	ENSRNOT00000023628	0.658772	6.95209	19.1044	1.23762e-05	0.00237312	Hspa4	ENSRNOG00000016596
13324	ENSRNOT00000096937	1.10872	4.17648	19.1041	1.23782e-05	0.00237312	Pbx3	ENSRNOG00000022162
17989	ENSRNOT00000113938	1.48469	4.63899	19.1323	1.21962e-05	0.00237312	Hcfc1	ENSRNOG00000051948
6093	ENSRNOT00000029580	-0.744374	5.9048	19.0348	1.28355e-05	0.00242241	Rps6kb2	ENSRNOG00000021689
16220	ENSRNOT00000107442	-1.09521	4.06561	19.0281	1.28806e-05	0.00242241	Csnk2a2	ENSRNOG00000011933
4439	ENSRNOT00000022253	0.938971	4.99547	18.957	1.337e-05	0.00249072	Fgfr2	ENSRNOG00000016374
11099	ENSRNOT00000084320	1.77232	1.58512	18.8636	1.40407e-05	0.00259123	Cd46	ENSRNOG00000008193
3522	ENSRNOT00000017809	1.74035	0.809925	18.6435	1.57584e-05	0.00288131	Rps6ka2	ENSRNOG00000013194
12811	ENSRNOT00000095142	-1.51883	2.84225	18.6227	1.59311e-05	0.00288617	Phyhd1	ENSRNOG00000016794
11069	ENSRNOT00000084090	1.12285	4.63195	18.5344	1.66863e-05	0.00289038	Ssr1	ENSRNOG00000014165
16819	ENSRNOT00000109662	1.31214	5.09456	18.5454	1.65904e-05	0.00289038	Raf1	ENSRNOG00000010153
18296	ENSRNOT00000115047	-0.558725	9.53376	18.5351	1.66802e-05	0.00289038	Gnas	ENSRNOG00000047374
18400	ENSRNOT00000115399	-0.925564	4.97481	18.5695	1.63823e-05	0.00289038	Rps6kl1	ENSRNOG00000005530
19432	ENSRNOT00000119200	-1.22301	3.74876	18.5416	1.66238e-05	0.00289038	NA	ENSRNOG00000063305
333	ENSRNOT00000001685	2.05037	1.62903	18.4767	1.7199e-05	0.00293829	Clip1	ENSRNOG00000001247
19514	ENSRNOT00000119546	-0.99746	4.69048	18.4699	1.72604e-05	0.00293829	Gtf2a1	ENSRNOG00000004300
10149	ENSRNOT00000077964	-0.736281	7.9003	18.3608	1.82777e-05	0.00308487	Leng8	ENSRNOG00000018642
16628	ENSRNOT00000108934	-0.63972	7.09863	18.302	1.88508e-05	0.00312812	Fcer1g	ENSRNOG00000024159
18219	ENSRNOT00000114741	1.51799	2.21668	18.3097	1.87752e-05	0.00312812	Nav3	ENSRNOG00000052157
17180	ENSRNOT00000110931	-1.75821	1.29115	18.2605	1.9266e-05	0.00317038	Mark2	ENSRNOG00000021184
18043	ENSRNOT00000114122	0.929259	5.93142	18.2172	1.97086e-05	0.00321641	Hnrnpa3	ENSRNOG00000052968
8871	ENSRNOT00000065893	-1.47337	4.25768	18.1122	2.08263e-05	0.00337095	Fbrsl1	ENSRNOG00000030721
8788	ENSRNOT00000065172	1.21616	4.80046	18.0618	2.13844e-05	0.00343315	Oga	ENSRNOG00000017822
7030	ENSRNOT00000039621	-1.65299	3.23229	18.0031	2.20546e-05	0.00351219	Sec61a2	ENSRNOG00000023278
5673	ENSRNOT00000027497	0.794939	7.4319	17.9368	2.28365e-05	0.00356592	Atp1a3	ENSRNOG00000020263
9829	ENSRNOT00000075700	-0.695894	6.43467	17.9287	2.29337e-05	0.00356592	Inafm1	ENSRNOG00000048848
18081	ENSRNOT00000114252	1.37345	3.73019	17.9574	2.25907e-05	0.00356592	Ddhd1	ENSRNOG00000009481
2316	ENSRNOT00000012129	-1.44414	3.88879	17.8772	2.3563e-05	0.00357921	Nsmf	ENSRNOG00000008810
14485	ENSRNOT00000101129	1.31949	4.18133	17.8811	2.3514e-05	0.00357921	Dnm1l	ENSRNOG00000001813
16823	ENSRNOT00000109679	-1.66993	1.25715	17.8812	2.35127e-05	0.00357921	Uxs1	ENSRNOG00000045605
13615	ENSRNOT00000098047	-1.39446	3.28607	17.7596	2.50655e-05	0.00377838	Rbp4	ENSRNOG00000015518
4590	ENSRNOT00000022924	1.02567	4.14563	17.7115	2.57068e-05	0.00384569	B3galnt2	ENSRNOG00000016855
8504	ENSRNOT00000060988	1.4872	2.08195	17.635	2.67617e-05	0.00397341	Gpr34	ENSRNOG00000039759
14230	ENSRNOT00000100209	1.60031	3.66674	17.5943	2.73402e-05	0.004029	Arpp21	ENSRNOG00000008919
10587	ENSRNOT00000080745	-1.75011	3.98405	17.5509	2.79724e-05	0.00409164	Carmil1	ENSRNOG00000016576
3913	ENSRNOT00000019681	1.8905	1.21366	17.4914	2.88613e-05	0.00419062	Tcf7l2	ENSRNOG00000049232
10442	ENSRNOT00000079823	-0.66795	7.10373	17.4612	2.93235e-05	0.00422664	Rpl11	ENSRNOG00000026260
7533	ENSRNOT00000046108	-0.491623	14.6181	17.3884	3.04679e-05	0.00432841	Mt-atp6	ENSRNOG00000031979
18776	ENSRNOT00000116775	-1.15283	3.90256	17.3963	3.0341e-05	0.00432841	Sorbs2	ENSRNOG00000013391
13032	ENSRNOT00000095928	1.73898	2.43251	17.3112	3.17309e-05	0.00447564	Sirt2	ENSRNOG00000020102
17253	ENSRNOT00000111186	-1.28573	5.47104	17.2325	3.30725e-05	0.00463179	Rufy2	ENSRNOG00000065563
6271	ENSRNOT00000031291	1.46337	3.7702	17.1962	3.37117e-05	0.00468807	Agpat5	ENSRNOG00000028623
17367	ENSRNOT00000111594	-0.590209	7.40188	17.1771	3.40515e-05	0.00470221	Psd	ENSRNOG00000019435
2308	ENSRNOT00000012091	0.840547	5.56714	17.1205	3.50809e-05	0.00481071	Nptn	ENSRNOG00000009029
3218	ENSRNOT00000016386	1.1223	3.88892	17.1	3.54624e-05	0.00482949	Csnk2a2	ENSRNOG00000011933
14733	ENSRNOT00000102078	-2.00961	2.10777	17.0281	3.6831e-05	0.00498152	Ece1	ENSRNOG00000014241
18291	ENSRNOT00000115025	-1.58425	0.627959	16.9917	3.75437e-05	0.00504337	NA	ENSRNOG00000068179
16081	ENSRNOT00000106933	1.03176	4.97045	16.9783	3.7809e-05	0.00504469	Crmp1	ENSRNOG00000004781
2744	ENSRNOT00000014170	1.05718	5.12445	16.8859	3.96957e-05	0.00526087	Glrb	ENSRNOG00000010199
3872	ENSRNOT00000019512	1.15358	3.53795	16.7678	4.22438e-05	0.00552443	Myo5b	ENSRNOG00000014104
18791	ENSRNOT00000116829	-0.845288	5.73663	16.7725	4.21407e-05	0.00552443	Hrh3	ENSRNOG00000061153
14180	ENSRNOT00000100032	-1.16259	3.98332	16.6831	4.41726e-05	0.00570115	Prmt1	ENSRNOG00000026109
15616	ENSRNOT00000105242	0.762231	8.67948	16.6927	4.39492e-05	0.00570115	Actb	ENSRNOG00000034254
6481	ENSRNOT00000033733	-0.709415	7.25602	16.6701	4.44772e-05	0.00570319	Rpl31	ENSRNOG00000013508
16045	ENSRNOT00000106794	-0.876744	5.71373	16.6468	4.5026e-05	0.00573632	Camk1	ENSRNOG00000021781
15993	ENSRNOT00000106583	1.76095	3.15024	16.5821	4.65878e-05	0.00589723	Il6st	ENSRNOG00000013963
14286	ENSRNOT00000100375	0.871158	5.81032	16.5491	4.74076e-05	0.00596279	Eif4a1	ENSRNOG00000030628
19085	ENSRNOT00000117948	-1.36719	4.90037	16.5059	4.84991e-05	0.00606146	NA	ENSRNOG00000070065
16181	ENSRNOT00000107277	0.644777	7.90752	16.4902	4.89029e-05	0.00607349	Slc1a3	ENSRNOG00000016163
13200	ENSRNOT00000096552	1.2049	4.07338	16.4773	4.92365e-05	0.00607671	NA	ENSRNOG00000064815
12793	ENSRNOT00000095070	-1.64428	0.93789	16.4245	5.06264e-05	0.00620944	Gnpda1	ENSRNOG00000047213
10268	ENSRNOT00000078793	0.936845	4.63984	16.3933	5.1468e-05	0.00627369	St3gal5	ENSRNOG00000010284
17897	ENSRNOT00000113631	1.52605	1.96176	16.371	5.2075e-05	0.00630874	Ss18	ENSRNOG00000016800
4243	ENSRNOT00000021310	-1.1599	5.68385	16.3358	5.30528e-05	0.00638801	Ap2s1	ENSRNOG00000015865
13191	ENSRNOT00000096511	-1.06392	4.13021	16.2921	5.42902e-05	0.00645825	Oxa1l	ENSRNOG00000009713
17982	ENSRNOT00000113918	0.978362	4.45416	16.2985	5.4106e-05	0.00645825	NA	ENSRNOG00000065858
13666	ENSRNOT00000098210	-1.52821	0.525986	16.2737	5.48202e-05	0.00648224	Polr2j	ENSRNOG00000001430
5238	ENSRNOT00000025824	1.08361	5.19233	16.2385	5.58481e-05	0.00656448	Cct3	ENSRNOG00000019090
16165	ENSRNOT00000107222	1.63077	0.922683	16.1797	5.76087e-05	0.00673135	Epb41	ENSRNOG00000010037
18287	ENSRNOT00000115012	-0.945619	4.34748	16.1526	5.84395e-05	0.00678826	Lsm12	ENSRNOG00000020894
7161	ENSRNOT00000041306	-1.38212	6.15826	16.1259	5.92682e-05	0.00684426	AABR07048992.1	ENSRNOG00000032585
16452	ENSRNOT00000108331	1.4844	1.38802	16.1123	5.96955e-05	0.00685353	Yme1l1	ENSRNOG00000055012
4760	ENSRNOT00000023724	-0.610499	6.70787	16.0812	6.06849e-05	0.00692685	Gabarap	ENSRNOG00000017417
12866	ENSRNOT00000095354	-1.4659	1.72569	16.0661	6.11704e-05	0.00694214	Cd63	ENSRNOG00000007650
14433	ENSRNOT00000100960	-2.08082	3.82519	16.0464	6.18082e-05	0.00697444	Trim28	ENSRNOG00000027487
13180	ENSRNOT00000096470	1.06916	3.89328	15.9531	6.49311e-05	0.0072852	Hnrnpm	ENSRNOG00000007921
10041	ENSRNOT00000077189	-0.845076	6.74781	15.9358	6.55265e-05	0.00731046	Gtf2i	ENSRNOG00000001479
12120	ENSRNOT00000091095	1.19351	3.72789	15.9159	6.62218e-05	0.00734652	Tes	ENSRNOG00000051952
14032	ENSRNOT00000099566	1.52405	2.27984	15.8432	6.88132e-05	0.00759136	Sorbs1	ENSRNOG00000015658
11943	ENSRNOT00000089990	-0.715241	6.26808	15.8125	6.99384e-05	0.00767263	Fam193b	ENSRNOG00000039807
10409	ENSRNOT00000079593	1.16236	3.65443	15.7309	7.30199e-05	0.00796644	Rgs5	ENSRNOG00000002730
7913	ENSRNOT00000051268	-0.486675	11.4264	15.7087	7.38818e-05	0.00801617	Mt-nd6	ENSRNOG00000029042
1854	ENSRNOT00000009817	1.31158	3.42381	15.6367	7.67503e-05	0.00827544	Serping1	ENSRNOG00000007457
17664	ENSRNOT00000112698	0.831373	6.22627	15.6279	7.71094e-05	0.00827544	Rufy2	ENSRNOG00000065563
6648	ENSRNOT00000035628	0.909383	6.46529	15.5656	7.96921e-05	0.00850638	Ywhaz	ENSRNOG00000008195
4631	ENSRNOT00000023139	1.2493	3.69319	15.4902	8.29356e-05	0.008805	Ppp2r2d	ENSRNOG00000016940
10633	ENSRNOT00000081085	-0.772704	5.19183	15.4731	8.3687e-05	0.00883725	Ring1	ENSRNOG00000000467
3093	ENSRNOT00000015828	0.751024	5.50691	15.4336	8.54566e-05	0.00897612	Cbx3	ENSRNOG00000011814
16155	ENSRNOT00000107199	-0.702447	7.41358	15.4215	8.60021e-05	0.00898562	Cox4i1	ENSRNOG00000017817
10732	ENSRNOT00000081802	-0.47341	10.0515	15.3686	8.84451e-05	0.00914411	Ptms	ENSRNOG00000060098
11840	ENSRNOT00000089294	0.63608	6.52006	15.3731	8.82347e-05	0.00914411	Eif4a2	ENSRNOG00000001815
12654	ENSRNOT00000094487	1.34548	3.06718	15.3438	8.96166e-05	0.00921697	Ntm	ENSRNOG00000066437
15065	ENSRNOT00000103346	-1.27021	3.43557	15.3304	9.02502e-05	0.00923405	Zc3h4	ENSRNOG00000015229
7326	ENSRNOT00000043535	0.688248	5.56301	15.2639	9.34845e-05	0.00948766	Ankrd34a	ENSRNOG00000033741
17164	ENSRNOT00000110894	0.983423	4.07612	15.2598	9.36899e-05	0.00948766	RGD1566359	ENSRNOG00000063300
13226	ENSRNOT00000096637	-0.727961	6.94973	15.2446	9.44441e-05	0.00951524	Nudt3	ENSRNOG00000061176
15761	ENSRNOT00000105751	-0.717944	6.72537	15.2229	9.55358e-05	0.00957637	Clk1	ENSRNOG00000025768
12926	ENSRNOT00000095581	-1.21824	4.09847	15.1854	9.7455e-05	0.00967057	Sdhd	ENSRNOG00000022980
19519	ENSRNOT00000119562	-1.12137	4.52924	15.193	9.70613e-05	0.00967057	Rrp1	ENSRNOG00000001203
1747	ENSRNOT00000009222	2.01283	2.38056	15.1369	9.99871e-05	0.00978973	Eif2ak4	ENSRNOG00000006027
7801	ENSRNOT00000049812	0.795544	6.36777	15.1336	0.000100167	0.00978973	Rtn3	ENSRNOG00000021202
7943	ENSRNOT00000051613	-0.601398	7.35909	15.1359	0.00010004	0.00978973	Lrrc23	ENSRNOG00000026309
14607	ENSRNOT00000101616	1.08134	4.34855	15.1247	0.000100639	0.00978973	Gphn	ENSRNOG00000064630
3379	ENSRNOT00000017187	-1.09318	4.4533	15.0891	0.000102553	0.0099242	Cables1	ENSRNOG00000012795
18620	ENSRNOT00000116162	-1.33477	4.30829	15.0804	0.000103026	0.0099242	Camkv	ENSRNOG00000058938
9530	ENSRNOT00000073148	1.28875	3.03927	15.0684	0.000103686	0.00993923	Gria1	ENSRNOG00000045816
3392	ENSRNOT00000017234	1.49961	4.61196	15.0588	0.000104212	0.00994144	Hdgf	ENSRNOG00000042261
4169	ENSRNOT00000020907	1.1368	3.27691	14.9849	0.000108374	0.0102887	Hiat1-ps1	ENSRNOG00000015502
6090	ENSRNOT00000029546	-0.677194	6.41802	14.9118	0.000112656	0.0106441	Rps25	ENSRNOG00000027503
13126	ENSRNOT00000096239	-1.59832	1.1047	14.8929	0.000113793	0.0106496	Tasor2	ENSRNOG00000018011
16524	ENSRNOT00000108573	-1.01124	5.35029	14.8988	0.000113436	0.0106496	Vps28	ENSRNOG00000014633
16291	ENSRNOT00000107735	1.403	1.61094	14.8565	0.000116007	0.0107576	Lamp2	ENSRNOG00000000164
18701	ENSRNOT00000116486	-0.565457	10.0531	14.856	0.000116037	0.0107576	Actb	ENSRNOG00000034254
7089	ENSRNOT00000040430	1.02385	4.91692	14.8333	0.000117443	0.010781	Atp1a1	ENSRNOG00000030019
14272	ENSRNOT00000100337	-0.997224	4.17609	14.8359	0.000117284	0.010781	Pikfyve	ENSRNOG00000015158
15817	ENSRNOT00000105940	-0.54072	8.5329	14.8256	0.000117927	0.010781	NA	ENSRNOG00000069588
5657	ENSRNOT00000027441	-0.96277	5.11997	14.8099	0.000118912	0.010821	Pias4	ENSRNOG00000020230
4290	ENSRNOT00000021549	0.787811	5.73316	14.8011	0.000119464	0.0108213	Cert1	ENSRNOG00000015686
7642	ENSRNOT00000047550	-0.456699	13.5591	14.7214	0.000124623	0.0112371	Mt-nd1	ENSRNOG00000030644
16670	ENSRNOT00000109090	-1.31863	3.42471	14.7064	0.000125617	0.0112753	Fam184a	ENSRNOG00000026407
12975	ENSRNOT00000095762	0.637469	5.73023	14.6236	0.00013126	0.0117284	Rnf4	ENSRNOG00000013930
790	ENSRNOT00000004159	1.4689	4.75202	14.5623	0.000135602	0.0120075	Glyr1	ENSRNOG00000003065
4514	ENSRNOT00000022594	0.671892	6.23155	14.5616	0.00013565	0.0120075	Pltp	ENSRNOG00000016488
8438	ENSRNOT00000060111	0.95749	4.06503	14.5539	0.000136207	0.0120075	Cfh	ENSRNOG00000030715
1412	ENSRNOT00000007255	0.974722	4.52639	14.5221	0.000138522	0.0121573	Sdc2	ENSRNOG00000004936
9909	ENSRNOT00000076422	0.632625	5.71125	14.4931	0.000140671	0.0122913	Tcp1	ENSRNOG00000014160
1086	ENSRNOT00000005612	-1.29441	2.36514	14.454	0.000143626	0.0124942	Eno3	ENSRNOG00000004078
15529	ENSRNOT00000104940	-1.41152	1.21632	14.4364	0.000144975	0.0125562	Hm13	ENSRNOG00000007738
19722	ENSRNOT00000120226	-0.652649	6.42886	14.4095	0.000147056	0.0126808	Shisa8	ENSRNOG00000049407
7085	ENSRNOT00000040348	1.99966	1.5292	14.3844	0.000149035	0.0127503	Rai14	ENSRNOG00000028872
11138	ENSRNOT00000084563	1.00045	4.13239	14.3747	0.000149798	0.0127503	Tnc	ENSRNOG00000058645
15784	ENSRNOT00000105824	1.38039	0.842196	14.3826	0.000149171	0.0127503	Afap1l2	ENSRNOG00000017164
13438	ENSRNOT00000097337	-1.27155	4.37878	14.3647	0.000150599	0.0127634	Khdrbs3	ENSRNOG00000009539
8806	ENSRNOT00000065334	0.794285	5.17147	14.3433	0.000152318	0.0127802	Crmp1	ENSRNOG00000004781
10678	ENSRNOT00000081401	0.821293	4.65886	14.3179	0.000154388	0.0127802	Scn3a	ENSRNOG00000005007
12379	ENSRNOT00000093030	-0.872748	4.70394	14.3333	0.000153133	0.0127802	Trdn	ENSRNOG00000012609
15090	ENSRNOT00000103437	-1.76664	4.75496	14.3535	0.000151495	0.0127802	Fkbp3	ENSRNOG00000004629
16907	ENSRNOT00000109966	1.348	4.51396	14.3144	0.00015468	0.0127802	Gtf2i	ENSRNOG00000001479
16972	ENSRNOT00000110213	-1.45443	2.88962	14.3165	0.000154508	0.0127802	Bbs4	ENSRNOG00000026171
5666	ENSRNOT00000027474	1.06229	5.14453	14.298	0.000156029	0.0128379	Syt11	ENSRNOG00000020279
7926	ENSRNOT00000051414	2.00605	6.40144	14.272	0.000158204	0.012933	Ndrg4	ENSRNOG00000012482
13806	ENSRNOT00000098711	-0.519628	8.37452	14.2685	0.000158494	0.012933	Rpsa	ENSRNOG00000018645
7289	ENSRNOT00000042928	-0.401094	13.7408	14.2485	0.000160188	0.0129889	Mt-nd4	ENSRNOG00000029707
8849	ENSRNOT00000065729	0.966364	4.70628	14.2148	0.000163087	0.0129889	Rbm39	ENSRNOG00000019848
11626	ENSRNOT00000087876	1.24503	2.42479	14.2254	0.000162164	0.0129889	Dpysl3	ENSRNOG00000018992
15019	ENSRNOT00000103183	1.54348	1.70053	14.2381	0.00016108	0.0129889	Msl1	ENSRNOG00000009643
15362	ENSRNOT00000104331	-2.50356	4.11394	14.2143	0.000163125	0.0129889	Atp6v1c1	ENSRNOG00000004846
15608	ENSRNOT00000105211	-0.961246	3.93033	14.234	0.000161424	0.0129889	B3galnt2	ENSRNOG00000016855
6625	ENSRNOT00000035371	1.60986	2.86978	14.1852	0.000165673	0.0131387	Ano10	ENSRNOG00000000219
7493	ENSRNOT00000045533	-0.655187	7.16027	14.1586	0.000168025	0.0132191	Col11a2	ENSRNOG00000000463
8542	ENSRNOT00000061303	0.594024	6.37638	14.1613	0.000167784	0.0132191	Nsmf	ENSRNOG00000008810
10370	ENSRNOT00000079373	0.937486	3.97024	14.1504	0.000168763	0.0132244	Vipas39	ENSRNOG00000049223
12513	ENSRNOT00000093962	-1.07294	3.68011	14.136	0.000170057	0.0132731	Tcn2	ENSRNOG00000004280
17654	ENSRNOT00000112665	0.626547	6.31848	14.1248	0.00017107	0.0132996	Ctbp1	ENSRNOG00000005428
9119	ENSRNOT00000067840	1.29186	4.06053	14.0769	0.000175486	0.0135895	Gpsm1	ENSRNOG00000018666
6907	ENSRNOT00000038222	1.18513	3.31243	14.0429	0.000178691	0.01373	Pla2g7	ENSRNOG00000025691
14429	ENSRNOT00000100938	-0.733054	5.76943	14.0443	0.000178556	0.01373	Pdap1	ENSRNOG00000000990
1691	ENSRNOT00000008969	0.814354	5.06701	14.0062	0.000182206	0.0139458	Laptm4b	ENSRNOG00000006766
19507	ENSRNOT00000119519	-0.69823	5.63607	13.9663	0.000186113	0.0141898	Fth1	ENSRNOG00000022619
6004	ENSRNOT00000028821	1.09003	4.87501	13.943	0.00018844	0.014312	Vps16	ENSRNOG00000021222
17581	ENSRNOT00000112378	1.1847	4.73545	13.8745	0.000195433	0.0147863	Strip2	ENSRNOG00000057729
11451	ENSRNOT00000086607	-0.859622	6.37199	13.8582	0.000197135	0.0148494	Ewsr1	ENSRNOG00000009437
18965	ENSRNOT00000117481	-0.868819	4.70334	13.8521	0.000197772	0.0148494	Ptpn11	ENSRNOG00000030124
12204	ENSRNOT00000091680	2.18656	4.77277	13.841	0.000198945	0.0148809	Ppp1ca	ENSRNOG00000018708
13416	ENSRNOT00000097226	-1.41359	0.944709	13.8201	0.000201173	0.0149908	Cd9	ENSRNOG00000019556
11922	ENSRNOT00000089843	-0.942168	4.38556	13.7638	0.000207289	0.0153885	Lman2l	ENSRNOG00000015699
8329	ENSRNOT00000058295	-0.457543	9.95353	13.7469	0.000209166	0.015466	Mbp	ENSRNOG00000016516
19175	ENSRNOT00000118261	-1.69997	1.13605	13.7403	0.0002099	0.015466	Josd2	ENSRNOG00000019442
7925	ENSRNOT00000051411	-0.648674	6.21751	13.728	0.000211279	0.0155098	Atp5mpl-ps1	ENSRNOG00000070574
2771	ENSRNOT00000014312	1.38701	7.93353	13.7177	0.000212444	0.0155376	Gpm6a	ENSRNOG00000010731
514	ENSRNOT00000002533	0.755213	6.63462	13.6957	0.000214952	0.0156204	Mapk1	ENSRNOG00000001849
4252	ENSRNOT00000021381	1.42322	4.12683	13.6869	0.000215951	0.0156204	Tspan5	ENSRNOG00000015913
10282	ENSRNOT00000078861	0.649533	7.48241	13.6918	0.000215388	0.0156204	Clu	ENSRNOG00000016460
6905	ENSRNOT00000038203	0.671457	5.39649	13.6046	0.000225636	0.0162614	Tnrc18	ENSRNOG00000024482
9290	ENSRNOT00000071211	-1.43883	2.22003	13.5651	0.000230426	0.0165422	Mllt1	ENSRNOG00000048736
14223	ENSRNOT00000100181	-1.68287	7.38571	13.5588	0.000231207	0.0165422	Gpm6a	ENSRNOG00000010731
2541	ENSRNOT00000013276	1.79185	3.68508	13.5294	0.000234859	0.0167428	Swap70	ENSRNOG00000009910
2672	ENSRNOT00000013858	-1.31771	1.01716	13.5156	0.000236584	0.0168051	Zmat3	ENSRNOG00000063864
13431	ENSRNOT00000097308	-2.17237	4.47034	13.4943	0.000239288	0.0169363	Ahdc1	ENSRNOG00000042855
7213	ENSRNOT00000041994	0.688823	5.98972	13.4722	0.000242118	0.0170754	Psd3	ENSRNOG00000013884
2528	ENSRNOT00000013230	1.12278	5.15639	13.4631	0.000243307	0.0170982	Slco1c1	ENSRNOG00000009740
6379	ENSRNOT00000032439	-0.767293	4.89168	13.4401	0.0002463	0.0172471	Tmem150b	ENSRNOG00000028273
1031	ENSRNOT00000005337	1.2731	3.50105	13.3875	0.000253311	0.0176754	Rptor	ENSRNOG00000003821
16575	ENSRNOT00000108746	1.31352	2.28489	13.3061	0.000264543	0.0183941	Hacl1	ENSRNOG00000019630
5279	ENSRNOT00000025980	0.650902	6.35756	13.2619	0.000270859	0.018661	Hnrnpk	ENSRNOG00000019113
9046	ENSRNOT00000067261	-1.47443	4.62579	13.227	0.000275942	0.018661	Tm9sf4	ENSRNOG00000009406
10952	ENSRNOT00000083372	-1.18324	4.43468	13.2494	0.000272662	0.018661	Psat1	ENSRNOG00000013971
11354	ENSRNOT00000085927	0.992088	3.79003	13.2606	0.000271047	0.018661	Rdh11	ENSRNOG00000054770
11673	ENSRNOT00000088170	1.37559	0.807924	13.2273	0.000275902	0.018661	Calcrl	ENSRNOG00000054695
13892	ENSRNOT00000099050	-1.64493	3.95233	13.2307	0.000275399	0.018661	Adcy2	ENSRNOG00000032150
15081	ENSRNOT00000103418	0.905884	5.90754	13.2275	0.000275865	0.018661	Ddx5	ENSRNOG00000030680
19569	ENSRNOT00000119722	-0.828569	5.83669	13.2548	0.000271884	0.018661	Spns1	ENSRNOG00000017621
8501	ENSRNOT00000060969	-1.01343	3.57529	13.2094	0.000278551	0.0187732	Cercam	ENSRNOG00000026604
15375	ENSRNOT00000104397	-0.861344	5.83588	13.2013	0.000279756	0.0187903	Ksr1	ENSRNOG00000012818
501	ENSRNOT00000002486	1.22595	3.20471	13.192	0.000281142	0.0188193	Tm7sf3	ENSRNOG00000001817
18385	ENSRNOT00000115358	-0.610568	6.47943	13.164	0.000285376	0.0190383	Safb2	ENSRNOG00000049511
13827	ENSRNOT00000098793	0.775149	5.55272	13.1498	0.00028755	0.0191187	Nrxn2	ENSRNOG00000021103
14768	ENSRNOT00000102257	-1.56705	4.78409	13.1405	0.000288982	0.0191494	Map4k4	ENSRNOG00000014013
646	ENSRNOT00000003332	1.48912	2.87218	13.1238	0.000291565	0.019256	Txndc11	ENSRNOG00000002452
11387	ENSRNOT00000086143	1.93938	1.85568	13.1034	0.000294767	0.0194026	Ppp2r5c	ENSRNOG00000004973
7226	ENSRNOT00000042098	-0.42665	14.0101	13.0616	0.000301414	0.0196779	Mt-cyb	ENSRNOG00000031766
15613	ENSRNOT00000105231	-0.690347	5.95506	13.0583	0.00030194	0.0196779	Arpc4	ENSRNOG00000008994
19168	ENSRNOT00000118237	-1.41944	0.538869	13.06	0.000301672	0.0196779	Bbs12	ENSRNOG00000068263
19667	ENSRNOT00000120073	-0.771629	6.44026	13.0471	0.000303762	0.0197315	Plekhb1	ENSRNOG00000018627
2857	ENSRNOT00000014747	1.16853	3.14198	13.019	0.000308342	0.019789	Ednrb	ENSRNOG00000010997
11307	ENSRNOT00000085693	1.5299	1.7305	13.0171	0.000308655	0.019789	Drp2	ENSRNOG00000026704
13052	ENSRNOT00000095996	2.27747	1.38531	13.0211	0.000308004	0.019789	Flna	ENSRNOG00000054890
13425	ENSRNOT00000097280	-1.29852	1.69893	13.0213	0.00030797	0.019789	Gpd1	ENSRNOG00000056457
1563	ENSRNOT00000008138	0.958417	4.47134	13.0062	0.000310454	0.0198399	Slc38a1	ENSRNOG00000005291
10529	ENSRNOT00000080359	-1.6891	1.03546	12.994	0.000312489	0.0198612	LOC120095481	ENSRNOG00000057077
16327	ENSRNOT00000107895	-1.6891	1.03546	12.9922	0.000312798	0.0198612	LOC120094955	ENSRNOG00000064360
18340	ENSRNOT00000115199	0.72985	6.09329	12.9699	0.000316537	0.0200342	Hk1	ENSRNOG00000046891
5028	ENSRNOT00000024914	1.90507	3.45618	12.953	0.000319411	0.0201515	Ptpa	ENSRNOG00000018457
3204	ENSRNOT00000016327	0.679011	5.5131	12.9291	0.000323513	0.0203452	Rasa2	ENSRNOG00000011909
15493	ENSRNOT00000104819	1.48242	3.51919	12.922	0.000324738	0.0203574	Cables1	ENSRNOG00000012795
7290	ENSRNOT00000042958	1.65322	1.90407	12.8458	0.000338238	0.0211367	Hapln1	ENSRNOG00000032002
15979	ENSRNOT00000106542	-1.78521	2.94162	12.8351	0.000340185	0.0211913	Cbfa2t2	ENSRNOG00000016352
11445	ENSRNOT00000086572	-1.32465	2.53017	12.8185	0.000343214	0.0213127	Cfh	ENSRNOG00000030715
5742	ENSRNOT00000027773	-0.523175	7.78056	12.7746	0.000351365	0.021479	Actn4	ENSRNOG00000020433
9187	ENSRNOT00000068323	-0.665201	6.40837	12.769	0.000352418	0.021479	Rps28	ENSRNOG00000042886
9431	ENSRNOT00000072367	1.15964	2.98585	12.7708	0.000352072	0.021479	Zik1	ENSRNOG00000046455
12647	ENSRNOT00000094464	-0.974977	5.67696	12.7846	0.000349493	0.021479	Herc1	ENSRNOG00000051671
13667	ENSRNOT00000098217	-0.535467	7.47775	12.7846	0.000349479	0.021479	Atp6v1e1	ENSRNOG00000011905
15380	ENSRNOT00000104429	-1.29581	2.53161	12.7838	0.000349637	0.021479	NA	ENSRNOG00000064961
3897	ENSRNOT00000019624	-0.570127	6.9799	12.7491	0.000356176	0.0215749	Ndufb10	ENSRNOG00000014568
7020	ENSRNOT00000039480	0.673298	5.73852	12.7533	0.000355388	0.0215749	Fam168b	ENSRNOG00000023467
8221	ENSRNOT00000056923	-0.851216	3.97873	12.7335	0.000359173	0.0216899	Gpatch4	ENSRNOG00000018969
19707	ENSRNOT00000120182	1.75794	2.43743	12.6946	0.00036672	0.0220781	Stx3	ENSRNOG00000021013
11283	ENSRNOT00000085527	1.42421	0.933071	12.6813	0.000369331	0.0221677	Slc6a9	ENSRNOG00000019484
7560	ENSRNOT00000046388	-1.06638	6.50844	12.6134	0.000382987	0.0229177	Aldoc	ENSRNOG00000011452
14492	ENSRNOT00000101157	0.57355	6.80297	12.5898	0.000387848	0.0231385	Cpeb4	ENSRNOG00000033169
14707	ENSRNOT00000102003	0.805015	4.63548	12.5724	0.000391478	0.0232847	Arid1a	ENSRNOG00000006137
17172	ENSRNOT00000110912	1.41394	1.64089	12.561	0.000393873	0.0233568	Hgs	ENSRNOG00000036696
1623	ENSRNOT00000008576	-1.65486	2.4229	12.5539	0.000395389	0.0233765	Tubg2	ENSRNOG00000006494
2392	ENSRNOT00000012461	-1.50945	0.438738	12.5174	0.00040318	0.023766	Mapk15	ENSRNOG00000009336
4942	ENSRNOT00000024517	-0.591909	6.30371	12.5029	0.000406326	0.0238801	Ndufv1	ENSRNOG00000018117
7198	ENSRNOT00000041789	0.698204	5.72501	12.4892	0.00040932	0.0239138	Gnb1	ENSRNOG00000016638
15901	ENSRNOT00000106248	1.14634	3.0552	12.492	0.000408692	0.0239138	Zc3h8	ENSRNOG00000017647
5144	ENSRNOT00000025403	1.36284	0.71881	12.4814	0.000411033	0.023943	Slc16a13	ENSRNOG00000018785
15279	ENSRNOT00000104025	0.918175	3.78037	12.4711	0.000413297	0.0240041	Shroom2	ENSRNOG00000024322
12557	ENSRNOT00000094130	-0.973962	4.24467	12.4546	0.000416962	0.0241459	Hdac7	ENSRNOG00000055597
2044	ENSRNOT00000010753	1.3348	2.64446	12.4309	0.000422282	0.0243583	Psma3	ENSRNOG00000007851
10131	ENSRNOT00000077848	-1.32991	2.06277	12.4219	0.000424331	0.0243583	LOC120095751	ENSRNOG00000055311
18759	ENSRNOT00000116701	-1.32991	2.06277	12.4241	0.000423837	0.0243583	LOC120101299	ENSRNOG00000067788
10417	ENSRNOT00000079633	0.886771	4.03944	12.4059	0.000427981	0.0244966	Nucb1	ENSRNOG00000020889
9057	ENSRNOT00000067391	-0.543152	6.86412	12.3999	0.000429347	0.0245038	Mt2A	ENSRNOG00000043098
14531	ENSRNOT00000101320	1.39216	2.59095	12.3859	0.000432598	0.0246182	Eif3g	ENSRNOG00000020619
16512	ENSRNOT00000108514	-0.78883	4.61777	12.369	0.000436522	0.0247701	Zfp689	ENSRNOG00000018877
11507	ENSRNOT00000086987	-0.570874	7.10941	12.3421	0.000442863	0.0250579	Taf15	ENSRNOG00000058393
8079	ENSRNOT00000055245	0.717121	5.42095	12.2962	0.000453891	0.0256086	Wls	ENSRNOG00000036816
17368	ENSRNOT00000111598	-0.495707	7.83415	12.2811	0.000457579	0.0257431	Acin1	ENSRNOG00000013533
5347	ENSRNOT00000026252	-0.714919	5.68533	12.2752	0.000459016	0.0257505	Zfp94	ENSRNOG00000019416
15576	ENSRNOT00000105106	-0.751374	6.95378	12.2559	0.000463789	0.0259409	Rpl37	ENSRNOG00000064545
19589	ENSRNOT00000119783	0.945667	5.66388	12.2509	0.000465037	0.0259409	Eif4g2	ENSRNOG00000017158
251	ENSRNOT00000001360	0.677224	5.98542	12.2325	0.000469633	0.026074	Tsc22d1	ENSRNOG00000001030
3798	ENSRNOT00000019162	-0.510824	8.5066	12.2185	0.000473171	0.026074	Rpl35	ENSRNOG00000014272
9246	ENSRNOT00000070818	1.06522	6.07725	12.2237	0.000471871	0.026074	Aplp2	ENSRNOG00000047179
9681	ENSRNOT00000074457	1.0161	4.62952	12.2222	0.000472252	0.026074	Aplp2	ENSRNOG00000047179
10744	ENSRNOT00000081925	-1.24594	2.31609	12.2093	0.000475508	0.026074	Ccdc24	ENSRNOG00000019586
12948	ENSRNOT00000095649	-1.55454	0.916197	12.2006	0.000477748	0.026074	Arrb1	ENSRNOG00000030404
13256	ENSRNOT00000096741	-0.84193	4.44602	12.1996	0.000477986	0.026074	Tcof1	ENSRNOG00000026108
16962	ENSRNOT00000110180	0.71876	5.31954	12.2101	0.000475314	0.026074	Tsc22d1	ENSRNOG00000001030
9711	ENSRNOT00000074695	0.868549	5.53916	12.1847	0.000481843	0.02614	Sh3gl1	ENSRNOG00000049683
16957	ENSRNOT00000110158	0.902437	4.48466	12.1857	0.000481567	0.02614	Slc25a36	ENSRNOG00000013802
17319	ENSRNOT00000111430	1.22329	2.84151	12.1753	0.000484268	0.0261996	Sybu	ENSRNOG00000004200
10125	ENSRNOT00000077790	0.690528	6.68847	12.1687	0.000485992	0.026221	Slc1a3	ENSRNOG00000016163
1	ENSRNOT00000000008	0.697417	8.27081	12.1471	0.000491644	0.0263103	Gad1	ENSRNOG00000000007
10163	ENSRNOT00000078044	-0.838685	4.29581	12.1474	0.000491551	0.0263103	Map4k3	ENSRNOG00000007172
11336	ENSRNOT00000085841	1.6944	2.4029	12.1488	0.000491187	0.0263103	Slc6a7	ENSRNOG00000018644
9080	ENSRNOT00000067554	0.586669	5.69967	12.1244	0.000497659	0.0265477	Apcdd1	ENSRNOG00000043304
16399	ENSRNOT00000108146	-1.10576	3.14021	12.1203	0.000498769	0.0265477	NA	ENSRNOG00000064310
9234	ENSRNOT00000068711	1.05818	3.09956	12.0876	0.000507585	0.0269443	Klhl22	ENSRNOG00000001878
323	ENSRNOT00000001638	0.845506	5.12212	12.0576	0.000515814	0.0272987	Pttg1ip	ENSRNOG00000001223
4207	ENSRNOT00000021096	-0.468146	8.42455	12.0483	0.000518409	0.0272987	Pabpn1	ENSRNOG00000042195
5148	ENSRNOT00000025421	-0.482698	8.44854	12.0499	0.000517958	0.0272987	Rpl18a	ENSRNOG00000018795
12949	ENSRNOT00000095653	-1.22199	3.32759	12.0388	0.000521036	0.0273641	Sertad2	ENSRNOG00000005393
4171	ENSRNOT00000020924	1.13588	2.44216	12.0303	0.00052343	0.0273692	Suv39h2	ENSRNOG00000015585
16685	ENSRNOT00000109154	1.05804	4.24775	12.0286	0.000523906	0.0273692	Flna	ENSRNOG00000054890
5736	ENSRNOT00000027756	0.849455	4.54094	12.0166	0.0005273	0.0274739	Fads2	ENSRNOG00000020440
14571	ENSRNOT00000101461	-1.78913	1.3754	12.0016	0.000531557	0.0276228	Cmtr1	ENSRNOG00000000532
6742	ENSRNOT00000036606	-0.675145	5.26174	11.9562	0.00054467	0.0282121	Asmtl	ENSRNOG00000028166
12634	ENSRNOT00000094418	0.807861	5.02676	11.949	0.00054678	0.0282121	Ccdc50	ENSRNOG00000001930
12970	ENSRNOT00000095749	0.677465	5.7886	11.9476	0.000547184	0.0282121	Smap1	ENSRNOG00000049127
1642	ENSRNOT00000008728	1.07174	3.35526	11.9334	0.000551359	0.0283533	Pdia4	ENSRNOG00000006228
2203	ENSRNOT00000011573	1.03595	4.30546	11.9282	0.0005529	0.0283587	Gabbr2	ENSRNOG00000008431
6956	ENSRNOT00000038860	1.00357	3.21083	11.906	0.00055952	0.0286024	Zbtb45	ENSRNOG00000027459
12300	ENSRNOT00000092428	-1.05444	3.22296	11.8986	0.000561767	0.0286024	Mapt	ENSRNOG00000005133
17358	ENSRNOT00000111567	-1.06455	2.80898	11.8978	0.000561996	0.0286024	Pcgf3	ENSRNOG00000000062
7625	ENSRNOT00000047296	0.598457	6.42585	11.8895	0.000564508	0.0286564	Pnpla8	ENSRNOG00000039091
2647	ENSRNOT00000013741	-0.995292	3.18559	11.873	0.000569523	0.0288369	RGD1562402	ENSRNOG00000040273
9784	ENSRNOT00000075371	1.6563	1.75918	11.8232	0.000584974	0.0295434	Ctdsp2	ENSRNOG00000068220
8665	ENSRNOT00000064274	1.6592	2.09062	11.8076	0.00058988	0.0297152	Simc1	ENSRNOG00000016932
5653	ENSRNOT00000027430	-0.835071	4.50557	11.8018	0.000591728	0.0297325	Capn15	ENSRNOG00000020239
19317	ENSRNOT00000118786	1.48927	2.49269	11.7873	0.000596362	0.0298892	Zfp385d	ENSRNOG00000014661
8115	ENSRNOT00000055669	1.47223	1.73928	11.7592	0.000605433	0.030267	Fnbp1l	ENSRNOG00000013798
9242	ENSRNOT00000069133	-0.399841	13.2047	11.7468	0.000609473	0.0303833	AY172581.24	ENSRNOG00000043866
10099	ENSRNOT00000077602	0.980502	3.57415	11.7427	0.000610835	0.0303833	Ube2j2	ENSRNOG00000019749
15275	ENSRNOT00000104020	0.981396	4.01323	11.7176	0.000619104	0.0307172	Gdi2	ENSRNOG00000018091
1423	ENSRNOT00000007300	1.01731	3.35383	11.707	0.000622648	0.0307916	Snx6	ENSRNOG00000005249
9661	ENSRNOT00000074322	0.480336	7.4989	11.7038	0.000623722	0.0307916	Dcx	ENSRNOG00000047712
2270	ENSRNOT00000011894	-0.781099	5.08823	11.6901	0.00062835	0.0309427	Strada	ENSRNOG00000008637
7686	ENSRNOT00000048175	-1.80969	1.62445	11.6818	0.00063115	0.0310033	Adgrl3	ENSRNOG00000030149
4376	ENSRNOT00000021938	-1.32744	0.474347	11.6681	0.000635804	0.0311544	Fcrl2	ENSRNOG00000016164
17313	ENSRNOT00000111406	1.38298	2.53986	11.6614	0.000638111	0.0311901	Cltc	ENSRNOG00000004291
12584	ENSRNOT00000094247	-1.64187	3.06797	11.6297	0.000649055	0.0316466	Lrrn2	ENSRNOG00000009691
6098	ENSRNOT00000029615	-0.577697	6.32614	11.6119	0.00065532	0.0317497	Usp54	ENSRNOG00000027012
10784	ENSRNOT00000082161	1.12861	2.77283	11.6187	0.00065292	0.0317497	Cacna2d1	ENSRNOG00000033531
14137	ENSRNOT00000099882	1.54711	2.10331	11.6088	0.000656414	0.0317497	Bfar	ENSRNOG00000003151
14940	ENSRNOT00000102849	1.19509	2.435	11.6054	0.0006576	0.0317497	Cog3	ENSRNOG00000000155
18488	ENSRNOT00000115733	0.753601	4.40857	11.5834	0.000665427	0.031996	Tm9sf3	ENSRNOG00000013443
18550	ENSRNOT00000115910	-0.870241	4.01325	11.582	0.000665942	0.031996	Prrc2b	ENSRNOG00000010217
9581	ENSRNOT00000073652	-0.592041	5.83677	11.5592	0.000674157	0.0323121	Bola2	ENSRNOG00000047988
18952	ENSRNOT00000117432	-1.23929	2.61754	11.5346	0.00068311	0.032583	NA	ENSRNOG00000063421
19157	ENSRNOT00000118195	-0.829072	5.89425	11.5386	0.000681676	0.032583	Camk2g	ENSRNOG00000009783
15160	ENSRNOT00000103647	0.919553	3.6612	11.5203	0.000688408	0.0326779	Scarb2	ENSRNOG00000002225
17839	ENSRNOT00000113406	-0.542672	6.16124	11.5241	0.000686992	0.0326779	Ncor1	ENSRNOG00000055246
18911	ENSRNOT00000117284	-0.642542	7.25666	11.5042	0.000694376	0.0328821	Tpi1	ENSRNOG00000015290
17523	ENSRNOT00000112165	1.078	3.01581	11.4981	0.000696657	0.0329112	Gpc5	ENSRNOG00000071105
4763	ENSRNOT00000023744	-0.537568	6.67339	11.4847	0.000701725	0.0330715	Kmt5c	ENSRNOG00000017508
8393	ENSRNOT00000059271	1.49962	3.16611	11.4673	0.000708305	0.0333021	Togaram1	ENSRNOG00000004415
17871	ENSRNOT00000113519	1.20059	1.67206	11.4526	0.000713927	0.0334868	St8sia2	ENSRNOG00000065528
7420	ENSRNOT00000044582	-0.439141	9.07375	11.4464	0.000716342	0.0335204	Mt-nd4l	ENSRNOG00000031053
7978	ENSRNOT00000052035	-1.61148	2.96384	11.432	0.000721904	0.0337008	Art3	ENSRNOG00000002256
14631	ENSRNOT00000101698	1.10794	3.45123	11.4106	0.00073027	0.034011	Got2	ENSRNOG00000011782
10938	ENSRNOT00000083268	-1.25729	1.38987	11.3961	0.000735989	0.0341966	Bmp4	ENSRNOG00000009694
8570	ENSRNOT00000061777	1.53437	0.498077	11.3574	0.000751499	0.0346726	Rock1	ENSRNOG00000031092
15133	ENSRNOT00000103564	-1.06305	2.67429	11.3609	0.000750075	0.0346726	Pde8a	ENSRNOG00000019005
18894	ENSRNOT00000117224	-1.26764	2.37427	11.3648	0.000748476	0.0346726	LOC102547183	ENSRNOG00000065497
3117	ENSRNOT00000015962	-0.429877	9.10326	11.3445	0.00075672	0.0347336	Cfl1	ENSRNOG00000020660
9279	ENSRNOT00000071098	-0.544229	6.02841	11.3411	0.000758099	0.0347336	Inafm1	ENSRNOG00000048848
16225	ENSRNOT00000107481	-1.03753	3.24495	11.3493	0.000754776	0.0347336	Cib1	ENSRNOG00000033498
10474	ENSRNOT00000079993	0.626994	6.47841	11.3224	0.000765794	0.0350049	Ahcyl1	ENSRNOG00000018569
7866	ENSRNOT00000050535	0.829297	5.25673	11.3169	0.000768068	0.0350278	Fyttd1	ENSRNOG00000034233
11282	ENSRNOT00000085525	0.811069	4.90229	11.303	0.000773808	0.0351273	Art3	ENSRNOG00000002256
11504	ENSRNOT00000086961	1.34724	1.77513	11.3037	0.000773512	0.0351273	Asic2	ENSRNOG00000058308
13593	ENSRNOT00000097946	-1.53639	0.258136	11.2799	0.000783487	0.0354851	NA	ENSRNOG00000067395
10908	ENSRNOT00000083046	0.748535	5.18529	11.268	0.00078853	0.0356318	Usp4	ENSRNOG00000054863
2305	ENSRNOT00000012080	1.34137	1.35743	11.2566	0.000793424	0.0357711	Draxin	ENSRNOG00000008911
5269	ENSRNOT00000025936	1.25161	2.67696	11.2367	0.000801969	0.0358883	Wtap	ENSRNOG00000019091
5677	ENSRNOT00000027511	-1.21001	3.78305	11.245	0.00079837	0.0358883	Dhrs1	ENSRNOG00000020264
15524	ENSRNOT00000104930	-0.980493	4.40929	11.2404	0.000800348	0.0358883	Fbrs	ENSRNOG00000042728
17429	ENSRNOT00000111802	-0.660534	6.05269	11.2336	0.000803294	0.0358883	Mapk8ip1	ENSRNOG00000058478
4370	ENSRNOT00000021920	0.868401	5.40447	11.2236	0.000807644	0.0360012	Atp5pb	ENSRNOG00000064742
17726	ENSRNOT00000112965	1.2754	0.684226	11.1949	0.000820225	0.0364797	Cx3cl1	ENSRNOG00000016326
7707	ENSRNOT00000048490	1.20299	5.60846	11.1802	0.000826737	0.0366867	Ddx5	ENSRNOG00000030680
18726	ENSRNOT00000116585	0.641796	5.3232	11.1757	0.000828764	0.0366942	Kcnj3	ENSRNOG00000005369
16566	ENSRNOT00000108722	-1.21266	0.620543	11.161	0.000835343	0.0368203	Nr2c2	ENSRNOG00000010536
19203	ENSRNOT00000118366	-1.30681	2.03277	11.1618	0.000834994	0.0368203	Phtf1	ENSRNOG00000019785
16005	ENSRNOT00000106625	-1.05129	9.96499	11.1279	0.000850384	0.0373219	NA	ENSRNOG00000070284
16517	ENSRNOT00000108540	1.27769	2.52884	11.1277	0.000850501	0.0373219	Arhgef40	ENSRNOG00000052354
15650	ENSRNOT00000105344	2.33031	3.8925	11.1182	0.000854834	0.0374288	NA	ENSRNOG00000063087
4234	ENSRNOT00000021245	-1.33775	2.80959	11.0951	0.000865576	0.0377931	Aurkc	ENSRNOG00000015825
10253	ENSRNOT00000078714	-1.57478	1.94246	11.0921	0.00086698	0.0377931	Haus8	ENSRNOG00000052038
11425	ENSRNOT00000086441	0.523014	6.24006	11.074	0.000875458	0.0380786	Qki	ENSRNOG00000048297
5862	ENSRNOT00000028213	1.80014	2.42999	11.0678	0.000878386	0.038122	Etv4	ENSRNOG00000020792
17304	ENSRNOT00000111351	-0.873122	4.69545	11.0571	0.000883492	0.0382077	Tmem214	ENSRNOG00000008812
19414	ENSRNOT00000119142	1.1017	4.12523	11.0555	0.00088423	0.0382077	Crebl2	ENSRNOG00000067300
18805	ENSRNOT00000116871	1.32673	0.581426	11.0397	0.00089183	0.0384519	Lcorl	ENSRNOG00000003787
14202	ENSRNOT00000100127	-0.981288	3.8405	11.0098	0.000906308	0.038991	Txndc15	ENSRNOG00000000133
15711	ENSRNOT00000105572	0.73697	4.81032	10.9938	0.000914195	0.0392448	Notch2	ENSRNOG00000018835
5980	ENSRNOT00000028725	-0.526671	6.73957	10.9818	0.000920107	0.0394129	Fkbp2	ENSRNOG00000021153
6938	ENSRNOT00000038596	-0.472532	7.42309	10.9721	0.000924938	0.0394487	Dzip1	ENSRNOG00000010311
18875	ENSRNOT00000117134	1.22435	3.0671	10.9756	0.00092321	0.0394487	Stox2	ENSRNOG00000009590
5453	ENSRNOT00000026648	-0.527504	6.13011	10.9539	0.000934052	0.0397515	Timm13	ENSRNOG00000019682
6117	ENSRNOT00000029791	-0.462645	8.69145	10.9371	0.000942583	0.0398811	Rps15	ENSRNOG00000024603
8330	ENSRNOT00000058296	-0.668728	6.18179	10.936	0.000943155	0.0398811	Mbp	ENSRNOG00000016516
8692	ENSRNOT00000064452	0.830496	5.97865	10.9433	0.000939452	0.0398811	Slc2a1	ENSRNOG00000007284
19067	ENSRNOT00000117871	0.912501	4.64277	10.9128	0.000955039	0.0402973	Ppp3cb	ENSRNOG00000054782
17536	ENSRNOT00000112219	1.01181	3.31544	10.8971	0.00096316	0.0405533	Pcdhga5	ENSRNOG00000063070
12224	ENSRNOT00000091810	0.912747	3.44117	10.8844	0.000969793	0.0406592	Ubl4a	ENSRNOG00000053061
15962	ENSRNOT00000106468	-0.740949	5.12851	10.8847	0.000969645	0.0406592	Pkn1	ENSRNOG00000004131
5882	ENSRNOT00000028315	-0.449318	8.90745	10.8728	0.000975883	0.0408279	Ftl1	ENSRNOG00000064385
17570	ENSRNOT00000112327	1.62538	3.30424	10.8539	0.000985889	0.0411593	Pds5b	ENSRNOG00000001098
1436	ENSRNOT00000007379	1.78792	2.72364	10.8299	0.000998765	0.0416089	Ypel2	ENSRNOG00000005447
4862	ENSRNOT00000024214	1.2871	2.19221	10.8119	0.00100852	0.0418172	Ncoa5	ENSRNOG00000017824
6647	ENSRNOT00000035621	-0.689012	5.02907	10.8089	0.00101012	0.0418172	Nipsnap2	ENSRNOG00000023919
17348	ENSRNOT00000111539	0.648847	5.56901	10.8154	0.00100661	0.0418172	Nfe2l1	ENSRNOG00000008830
3396	ENSRNOT00000017243	1.62056	3.06787	10.7808	0.00102557	0.0422797	Stt3b	ENSRNOG00000011922
11051	ENSRNOT00000084012	-0.552983	7.8437	10.782	0.0010249	0.0422797	Agap2	ENSRNOG00000025584
6662	ENSRNOT00000035781	2.32414	1.07829	10.7746	0.00102904	0.0423345	Tlr3	ENSRNOG00000021726
9251	ENSRNOT00000070862	-0.532247	6.83393	10.7624	0.00103585	0.0425257	Ndufa11	ENSRNOG00000048320
3505	ENSRNOT00000017714	1.41458	2.07881	10.7571	0.00103881	0.042559	Chst10	ENSRNOG00000012815
3464	ENSRNOT00000017494	0.541251	8.5844	10.7481	0.00104388	0.0426766	Ndrg4	ENSRNOG00000012482
6840	ENSRNOT00000037551	-0.740078	5.23421	10.7443	0.00104601	0.0426766	LOC100363452	ENSRNOG00000021395
2745	ENSRNOT00000014171	-1.05651	2.96924	10.7367	0.00105029	0.0427084	Tbc1d5	ENSRNOG00000010637
7398	ENSRNOT00000044346	0.49751	7.13334	10.7353	0.00105111	0.0427084	Csnk1a1	ENSRNOG00000063313
15157	ENSRNOT00000103639	1.68238	1.40214	10.7298	0.00105424	0.0427476	Pi4kb	ENSRNOG00000021024
14004	ENSRNOT00000099467	-0.883981	4.63626	10.7074	0.00106706	0.0431789	Arfgap2	ENSRNOG00000014429
10967	ENSRNOT00000083464	1.40836	1.59861	10.6846	0.00108031	0.0436255	Ewsr1	ENSRNOG00000009437
1272	ENSRNOT00000006443	0.533905	6.50691	10.6654	0.00109157	0.0439903	Rtn4	ENSRNOG00000004621
8729	ENSRNOT00000064723	1.14459	3.63423	10.6309	0.00111211	0.0447191	Sec23b	ENSRNOG00000008411
9464	ENSRNOT00000072624	1.54039	1.38102	10.6275	0.00111418	0.0447191	Lrig1	ENSRNOG00000012952
1169	ENSRNOT00000005934	0.739776	4.49138	10.6077	0.00112617	0.044747	Tcn2	ENSRNOG00000004280
3783	ENSRNOT00000019096	-0.505034	6.96288	10.6021	0.0011296	0.044747	Plch2	ENSRNOG00000014226
4164	ENSRNOT00000020870	0.70292	4.91449	10.6095	0.00112505	0.044747	Mal	ENSRNOG00000015445
7355	ENSRNOT00000043951	-0.495295	7.08194	10.6177	0.0011201	0.044747	Caskin1	ENSRNOG00000003195
8378	ENSRNOT00000059162	1.45836	2.73542	10.5965	0.00113301	0.044747	Nars1	ENSRNOG00000017852
8385	ENSRNOT00000059190	0.711274	6.12564	10.5998	0.00113103	0.044747	Hnrnph1	ENSRNOG00000003399
9270	ENSRNOT00000070986	-1.07851	3.89549	10.5998	0.00113101	0.044747	Ubxn6	ENSRNOG00000048509
17129	ENSRNOT00000110795	-1.12819	0.792109	10.6172	0.00112042	0.044747	Ltc4s	ENSRNOG00000003244
8155	ENSRNOT00000056141	-1.24526	1.41804	10.5881	0.0011382	0.0448623	Klhl18	ENSRNOG00000020880
6012	ENSRNOT00000028847	1.33565	3.81345	10.5796	0.00114342	0.0448889	Atrn	ENSRNOG00000021240
18000	ENSRNOT00000113987	1.10613	2.94727	10.5814	0.00114229	0.0448889	Ccdc85a	ENSRNOG00000003374
15377	ENSRNOT00000104424	-1.46233	1.59342	10.5713	0.00114857	0.0449294	Slc12a6	ENSRNOG00000005196
19586	ENSRNOT00000119775	-0.565866	5.70854	10.5706	0.001149	0.0449294	Dalrd3	ENSRNOG00000020159
18150	ENSRNOT00000114504	-1.36273	2.70696	10.541	0.00116752	0.0454735	Sec23b	ENSRNOG00000008411
19362	ENSRNOT00000118949	-1.81593	3.77924	10.5432	0.00116615	0.0454735	Cnrip1	ENSRNOG00000005326
707	ENSRNOT00000003687	-0.588488	6.03115	10.5271	0.00117637	0.0457278	Cluh	ENSRNOG00000002669
13527	ENSRNOT00000097704	-0.485542	6.61767	10.495	0.00119695	0.0464365	LOC120101769	ENSRNOG00000067832
13990	ENSRNOT00000099398	-1.2164	0.681558	10.4887	0.00120106	0.0465045	Aco2	ENSRNOG00000024128
8522	ENSRNOT00000061151	-0.669742	7.73671	10.4785	0.00120771	0.0466706	Celf4	ENSRNOG00000014503
17563	ENSRNOT00000112312	-0.642045	6.50275	10.4714	0.00121238	0.0467596	Atp5mg	ENSRNOG00000028884
11299	ENSRNOT00000085644	-1.39299	5.16628	10.4649	0.00121663	0.0468318	Myl6	ENSRNOG00000054140
5989	ENSRNOT00000028752	-0.510528	6.65914	10.4288	0.00124065	0.0475712	Otub1	ENSRNOG00000021175
17858	ENSRNOT00000113477	-0.403846	9.50997	10.4313	0.00123899	0.0475712	Tle5	ENSRNOG00000052025
17649	ENSRNOT00000112649	0.884464	3.36938	10.4211	0.00124583	0.0476771	Ndufa10	ENSRNOG00000016470
8363	ENSRNOT00000058817	0.921697	4.00758	10.4098	0.00125349	0.047785	Acsl6	ENSRNOG00000026745
15611	ENSRNOT00000105221	0.949715	5.83975	10.4108	0.00125281	0.047785	Ganab	ENSRNOG00000019724
16937	ENSRNOT00000110085	0.957032	3.73758	10.3928	0.00126509	0.0481345	Postn	ENSRNOG00000012660
10461	ENSRNOT00000079923	1.24488	2.41556	10.3886	0.00126799	0.0481519	Snrpb	ENSRNOG00000006961
4791	ENSRNOT00000023900	1.54712	4.22295	10.3724	0.00127916	0.0482024	Mccc2	ENSRNOG00000017752
6441	ENSRNOT00000033327	0.718724	5.09539	10.3694	0.00128122	0.0482024	Kcnf1	ENSRNOG00000024310
8636	ENSRNOT00000064060	0.777367	4.9267	10.368	0.00128219	0.0482024	Tmem38a	ENSRNOG00000011912
10593	ENSRNOT00000080794	-1.01202	2.99168	10.3813	0.00127298	0.0482024	Abhd6	ENSRNOG00000008167
11833	ENSRNOT00000089241	1.04717	2.63654	10.3654	0.00128397	0.0482024	Cd151	ENSRNOG00000062573
17255	ENSRNOT00000111194	0.949593	3.52247	10.3773	0.00127575	0.0482024	Cers6	ENSRNOG00000024595
12509	ENSRNOT00000093931	1.1011	1.30205	10.3504	0.00129449	0.0485053	Tyms	ENSRNOG00000037225
11851	ENSRNOT00000089377	-0.710941	4.83351	10.3457	0.0012978	0.0485371	Slmap	ENSRNOG00000011307
5340	ENSRNOT00000026224	-0.858483	3.57314	10.3337	0.00130621	0.0487593	Stx4	ENSRNOG00000019302
9788	ENSRNOT00000075401	0.677724	4.7113	10.3155	0.00131917	0.0491055	Rgmb	ENSRNOG00000064721
11254	ENSRNOT00000085301	0.722609	4.36737	10.3088	0.00132398	0.0491055	Papss1	ENSRNOG00000011311
18536	ENSRNOT00000115872	-0.691832	4.83841	10.3097	0.00132332	0.0491055	Bcas1	ENSRNOG00000012906
19496	ENSRNOT00000119469	-1.01289	3.08752	10.3068	0.00132543	0.0491055	NA	ENSRNOG00000069108
10340	ENSRNOT00000079208	-0.605555	5.11159	10.2909	0.00133685	0.049436	Pnpla7	ENSRNOG00000008190
4448	ENSRNOT00000022309	0.622389	5.56376	10.2775	0.0013466	0.0497033	Got1	ENSRNOG00000016356
13953	ENSRNOT00000099250	-1.17313	1.83058	10.2607	0.00135896	0.0500304	NA	ENSRNOG00000064588
13987	ENSRNOT00000099394	-1.15777	3.07249	10.2585	0.00136053	0.0500304	C4h2orf81	ENSRNOG00000010048
8475	ENSRNOT00000060594	-0.821795	3.77448	10.2495	0.00136721	0.0501829	Ccl27	ENSRNOG00000039530
9728	ENSRNOT00000074829	0.526574	5.9928	10.2437	0.00137153	0.050248	Pdia6	ENSRNOG00000050197
2600	ENSRNOT00000013520	1.01796	2.92715	10.2216	0.00138802	0.050664	Cldn10	ENSRNOG00000010085
4871	ENSRNOT00000024253	1.09848	2.62308	10.2235	0.00138666	0.050664	Hapln3	ENSRNOG00000022321
19180	ENSRNOT00000118281	-1.37664	4.24812	10.2118	0.00139548	0.0508423	Chrm2	ENSRNOG00000046972
6431	ENSRNOT00000033196	0.939623	4.59352	10.1907	0.00141147	0.0513303	Gclc	ENSRNOG00000006302
11447	ENSRNOT00000086590	0.419127	8.37282	10.173	0.0014251	0.0517305	Selenop	ENSRNOG00000053086
185	ENSRNOT00000001059	0.746023	4.51441	10.165	0.00143128	0.0518512	Hsf2	ENSRNOG00000000808
12681	ENSRNOT00000094550	-0.567913	6.65247	10.162	0.00143367	0.0518512	Ncln	ENSRNOG00000004793
16842	ENSRNOT00000109752	1.00605	4.27501	10.1521	0.00144134	0.0519563	Map4	ENSRNOG00000020748
19594	ENSRNOT00000119813	-0.77279	4.23093	10.1515	0.00144184	0.0519563	Ypel3	ENSRNOG00000019721
752	ENSRNOT00000003932	0.475736	9.03412	10.1424	0.00144895	0.051993	Atp1b1	ENSRNOG00000002934
15624	ENSRNOT00000105262	0.87134	4.51151	10.1335	0.00145603	0.051993	Ppp3ca	ENSRNOG00000009882
19272	ENSRNOT00000118614	-0.706778	5.24607	10.1387	0.0014519	0.051993	Auts2	ENSRNOG00000000885
19346	ENSRNOT00000118882	1.61464	0.865451	10.1359	0.00145406	0.051993	Tmem109	ENSRNOG00000028017
19385	ENSRNOT00000119025	1.32868	2.34461	10.1461	0.00144606	0.051993	Tmed8	ENSRNOG00000064799
711	ENSRNOT00000003696	0.493155	7.1021	10.1152	0.00147055	0.052417	Pafah1b1	ENSRNOG00000002755
14539	ENSRNOT00000101347	0.769029	4.10517	10.1108	0.00147401	0.0524456	NA	ENSRNOG00000063720
5386	ENSRNOT00000026376	1.25891	2.20099	10.0991	0.00148344	0.0526862	Ttc9c	ENSRNOG00000019464
9158	ENSRNOT00000068108	-0.494041	6.67316	10.0822	0.0014971	0.0529832	Clk3	ENSRNOG00000030126
19358	ENSRNOT00000118936	-0.62554	5.01942	10.0821	0.00149717	0.0529832	Mpnd	ENSRNOG00000048282
8126	ENSRNOT00000055810	-0.752431	4.2136	10.077	0.00150132	0.0530349	Pced1a	ENSRNOG00000021221
7543	ENSRNOT00000046201	-0.528713	9.92807	10.0255	0.00154392	0.0544424	Mt-atp8	ENSRNOG00000033299
13100	ENSRNOT00000096160	-0.561051	6.08122	10.0216	0.00154717	0.05446	Dnajc8	ENSRNOG00000013255
2246	ENSRNOT00000011797	0.748787	4.68626	10.0173	0.00155078	0.0544899	Fam91a1	ENSRNOG00000008271
3229	ENSRNOT00000016418	1.00561	4.55266	10.0088	0.00155792	0.0545466	Prkcb	ENSRNOG00000012061
5893	ENSRNOT00000028375	-0.761984	4.78237	10.0092	0.00155756	0.0545466	G6pc3	ENSRNOG00000020902
11940	ENSRNOT00000089978	-0.722604	4.19518	9.99782	0.00156726	0.0547763	Mrps18b	ENSRNOG00000000804
14387	ENSRNOT00000100770	-0.510049	7.04191	9.98815	0.00157551	0.0549675	Uqcrq	ENSRNOG00000067979
16717	ENSRNOT00000109274	-0.657349	6.60971	9.95701	0.00160238	0.0558064	Prkaca	ENSRNOG00000005257
7362	ENSRNOT00000044009	0.641651	5.47874	9.94357	0.00161413	0.0561165	Maob	ENSRNOG00000029778
187	ENSRNOT00000001066	0.506433	8.16423	9.91392	0.00164034	0.0568879	Serinc1	ENSRNOG00000029360
8987	ENSRNOT00000066809	0.788971	4.07751	9.91196	0.00164208	0.0568879	Slc9a6	ENSRNOG00000000879
3827	ENSRNOT00000019285	0.461646	6.76185	9.9035	0.00164965	0.05705	Ctsh	ENSRNOG00000014064
18032	ENSRNOT00000114091	1.24921	3.16611	9.89561	0.00165674	0.0571951	Nap1l1	ENSRNOG00000003890
4224	ENSRNOT00000021193	0.977977	4.21073	9.86886	0.001681	0.0577876	Bcat1	ENSRNOG00000015514
17078	ENSRNOT00000110616	0.850179	3.80496	9.86702	0.00168268	0.0577876	Utrn	ENSRNOG00000011058
19026	ENSRNOT00000117749	0.881336	4.11312	9.8692	0.00168069	0.0577876	Carmil1	ENSRNOG00000016576
618	ENSRNOT00000003191	0.895723	3.30006	9.86332	0.00168607	0.0578035	Gabra4	ENSRNOG00000002336
9896	ENSRNOT00000076281	1.06605	3.07693	9.85843	0.00169055	0.0578567	Tlk1	ENSRNOG00000009300
13707	ENSRNOT00000098355	-0.735565	4.37607	9.81677	0.00172927	0.0590326	Ndufv3	ENSRNOG00000001182
17292	ENSRNOT00000111311	1.22376	3.14666	9.81506	0.00173089	0.0590326	Mbd1	ENSRNOG00000024104
15628	ENSRNOT00000105272	-0.800426	3.91323	9.78536	0.00175906	0.0598901	Atp5po	ENSRNOG00000001991
5070	ENSRNOT00000025093	2.00337	5.74901	9.75611	0.00178727	0.0607458	LOC100359583	ENSRNOG00000018584
4047	ENSRNOT00000020357	0.347364	10.2439	9.74808	0.0017951	0.060907	Sparcl1	ENSRNOG00000015093
17951	ENSRNOT00000113821	0.596476	5.92995	9.7418	0.00180124	0.0610105	Pja1	ENSRNOG00000047339
101	ENSRNOT00000000523	1.11754	1.84561	9.69784	0.00184484	0.0620819	RT1-Ba	ENSRNOG00000000451
635	ENSRNOT00000003277	0.672005	5.62244	9.68932	0.00185342	0.0620819	Uso1	ENSRNOG00000002301
2078	ENSRNOT00000010947	-0.571068	5.36298	9.67237	0.0018706	0.0620819	Dnm2	ENSRNOG00000007649
2808	ENSRNOT00000014491	0.700993	5.40939	9.67509	0.00186783	0.0620819	Scg3	ENSRNOG00000010784
10736	ENSRNOT00000081866	0.914912	4.13481	9.67707	0.00186582	0.0620819	Smc5	ENSRNOG00000030572
11771	ENSRNOT00000088802	0.826119	4.96976	9.67541	0.00186751	0.0620819	Pdha1	ENSRNOG00000025383
12754	ENSRNOT00000094911	-0.541067	6.24237	9.67707	0.00186582	0.0620819	Iffo1	ENSRNOG00000018533
14556	ENSRNOT00000101398	1.0385	2.97041	9.68625	0.00185652	0.0620819	Dcaf8	ENSRNOG00000006785
15502	ENSRNOT00000104846	0.820119	4.10043	9.69254	0.00185018	0.0620819	Gpr17	ENSRNOG00000065480
16553	ENSRNOT00000108683	-0.76136	15.1753	9.69206	0.00185066	0.0620819	LOC120093067	ENSRNOG00000064743
17382	ENSRNOT00000111642	0.529973	6.78387	9.67793	0.00186495	0.0620819	Slc22a17	ENSRNOG00000016414
19288	ENSRNOT00000118680	-0.682719	4.37858	9.70646	0.00183621	0.0620819	Spata7	ENSRNOG00000003955
10638	ENSRNOT00000081123	-0.459037	8.21207	9.64688	0.00189673	0.0627464	Selenom	ENSRNOG00000061231
19500	ENSRNOT00000119499	0.527886	5.98051	9.64664	0.00189698	0.0627464	Nrep	ENSRNOG00000068914
17513	ENSRNOT00000112129	-0.686116	5.24081	9.63511	0.00190893	0.063036	Gsn	ENSRNOG00000018991
145	ENSRNOT00000000733	0.56943	6.54474	9.60684	0.00193854	0.0638006	Fyn	ENSRNOG00000000596
12683	ENSRNOT00000094555	-1.23555	0.916096	9.60973	0.00193549	0.0638006	Nr3c1	ENSRNOG00000014096
18317	ENSRNOT00000115119	0.926574	4.13096	9.60033	0.00194542	0.0639205	Ptprd	ENSRNOG00000005711
7834	ENSRNOT00000050156	-0.328674	15.6089	9.57834	0.00196887	0.0641719	Mt-co1	ENSRNOG00000034234
8832	ENSRNOT00000065526	0.714624	4.61583	9.58893	0.00195755	0.0641719	Fbxo25	ENSRNOG00000042464
12712	ENSRNOT00000094711	1.11653	1.59871	9.57755	0.00196971	0.0641719	Fermt2	ENSRNOG00000009102
14787	ENSRNOT00000102305	0.587557	6.79174	9.57489	0.00197257	0.0641719	Fscn1	ENSRNOG00000056585
17768	ENSRNOT00000113171	0.78644	4.5535	9.57952	0.00196759	0.0641719	Pcdh1	ENSRNOG00000060410
17873	ENSRNOT00000113525	1.10821	4.31734	9.58351	0.00196333	0.0641719	Prnp	ENSRNOG00000021259
18369	ENSRNOT00000115308	1.25985	1.19759	9.56814	0.00197983	0.0642381	Zbtb18	ENSRNOG00000004423
19097	ENSRNOT00000117974	-0.596428	5.37704	9.56696	0.00198111	0.0642381	Wnk2	ENSRNOG00000016684
7962	ENSRNOT00000051843	1.3042	2.59951	9.56335	0.00198501	0.064259	Orc2	ENSRNOG00000012558
10621	ENSRNOT00000080963	0.561399	6.9065	9.5534	0.0019958	0.0643971	Rasa3	ENSRNOG00000017671
11242	ENSRNOT00000085210	-0.953385	3.69938	9.55456	0.00199454	0.0643971	Bptf	ENSRNOG00000047296
8073	ENSRNOT00000055187	-0.487075	7.45444	9.54338	0.00200672	0.0646438	Hdac5	ENSRNOG00000020905
699	ENSRNOT00000003638	-0.618972	5.14607	9.53855	0.002012	0.0647085	Mtmr1	ENSRNOG00000002697
14948	ENSRNOT00000102879	-0.644721	5.06234	9.51376	0.00203937	0.0654819	Bicra	ENSRNOG00000011262
18504	ENSRNOT00000115766	1.3721	1.75601	9.49429	0.00206112	0.0660729	Enc1	ENSRNOG00000016541
6065	ENSRNOT00000029284	0.908799	4.11164	9.48924	0.00206681	0.0660972	Fgfr1	ENSRNOG00000016050
19725	ENSRNOT00000120247	1.04732	4.0655	9.48767	0.00206857	0.0660972	Serbp1	ENSRNOG00000005890
1983	ENSRNOT00000010489	1.14455	2.41694	9.47726	0.00208035	0.0662524	Phospho2	ENSRNOG00000007979
5519	ENSRNOT00000026925	-1.15594	0.478869	9.4741	0.00208393	0.0662524	Folr2	ENSRNOG00000019890
7394	ENSRNOT00000044313	1.3823	2.11755	9.4659	0.00209327	0.0662524	Slc39a12	ENSRNOG00000025639
9770	ENSRNOT00000075236	-0.977708	2.43764	9.47995	0.0020773	0.0662524	Cox7a1	ENSRNOG00000050015
15912	ENSRNOT00000106301	-1.20795	3.44556	9.46564	0.00209356	0.0662524	Rnf185	ENSRNOG00000019325
19206	ENSRNOT00000118381	0.562977	5.85803	9.47043	0.0020881	0.0662524	Rtn1	ENSRNOG00000004794
6906	ENSRNOT00000038212	-0.608748	4.94699	9.45516	0.00210556	0.0665255	Mt1	ENSRNOG00000025764
14769	ENSRNOT00000102260	1.25189	2.34107	9.44471	0.00211759	0.0667989	Jak1	ENSRNOG00000011157
1077	ENSRNOT00000005577	-0.497151	8.25074	9.43609	0.00212756	0.0670063	Rps29	ENSRNOG00000004196
5876	ENSRNOT00000028284	-0.747955	3.96384	9.40274	0.00216662	0.0676756	Tyrobp	ENSRNOG00000020845
8346	ENSRNOT00000058453	0.746591	5.24331	9.41262	0.00215498	0.0676756	Cd200	ENSRNOG00000002141
9985	ENSRNOT00000076841	-0.546028	6.21153	9.4004	0.00216938	0.0676756	Septin4	ENSRNOG00000007367
10894	ENSRNOT00000082958	-1.43252	1.20996	9.40872	0.00215956	0.0676756	Agpat4	ENSRNOG00000017731
13264	ENSRNOT00000096768	-0.668719	5.04849	9.40551	0.00216334	0.0676756	Scamp4	ENSRNOG00000018271
14120	ENSRNOT00000099821	-0.633424	8.44568	9.40346	0.00216577	0.0676756	Actg1	ENSRNOG00000036701
8359	ENSRNOT00000058700	1.1764	2.48775	9.38534	0.00218727	0.0679862	LOC100912427	ENSRNOG00000030807
8796	ENSRNOT00000065270	-1.18855	4.5518	9.38378	0.00218913	0.0679862	Copz1	ENSRNOG00000036835
15050	ENSRNOT00000103289	1.46965	2.91149	9.38334	0.00218966	0.0679862	Cnp	ENSRNOG00000017496
1626	ENSRNOT00000008608	-0.45399	7.53677	9.37981	0.00219388	0.0680104	Mif	ENSRNOG00000006589
195	ENSRNOT00000001098	-0.794159	5.11438	9.37469	0.00220002	0.0680938	Flot1	ENSRNOG00000000826
12113	ENSRNOT00000091050	1.03157	3.84414	9.36385	0.00221306	0.0683902	Tmbim6	ENSRNOG00000055579
8373	ENSRNOT00000058943	-0.432511	8.34678	9.35972	0.00221806	0.0684374	Rpl28	ENSRNOG00000017127
8251	ENSRNOT00000057222	-0.601207	5.51514	9.33761	0.00224498	0.0691523	Rpl36a	ENSRNOG00000011494
9366	ENSRNOT00000071796	-0.700853	4.84236	9.33496	0.00224823	0.0691523	Pomp	ENSRNOG00000049229
2274	ENSRNOT00000011915	0.854277	3.92328	9.32883	0.00225577	0.0692591	Slc37a3	ENSRNOG00000008725
7026	ENSRNOT00000039551	0.577478	6.09208	9.32643	0.00225872	0.0692591	Ddx3x	ENSRNOG00000023383
7411	ENSRNOT00000044486	0.98681	2.68026	9.32286	0.00226312	0.0692866	Abhd17b	ENSRNOG00000012514
16189	ENSRNOT00000107324	-0.713264	4.45858	9.30466	0.00228572	0.0698701	Acss2	ENSRNOG00000018755
7482	ENSRNOT00000045400	-0.596042	5.4553	9.29116	0.00230263	0.0702782	Macf1	ENSRNOG00000016047
138	ENSRNOT00000000700	-0.75426	5.4116	9.27441	0.00232377	0.0707049	AC096404.1	ENSRNOG00000000574
14771	ENSRNOT00000102265	-0.5271	5.61765	9.27575	0.00232208	0.0707049	Prss53	ENSRNOG00000026040
18365	ENSRNOT00000115295	-1.29132	1.36784	9.27025	0.00232906	0.0707569	Rrp8	ENSRNOG00000018766
14584	ENSRNOT00000101516	-1.22016	1.20532	9.26422	0.00233674	0.0708812	NA	ENSRNOG00000064615
16985	ENSRNOT00000110268	0.794193	4.0177	9.26111	0.00234072	0.0708928	Prpf39	ENSRNOG00000004521
13576	ENSRNOT00000097877	-0.577806	5.85249	9.2548	0.00234879	0.0709198	Srrm3	ENSRNOG00000001439
15364	ENSRNOT00000104339	-0.912883	3.99382	9.2565	0.00234661	0.0709198	Tfe3	ENSRNOG00000009605
990	ENSRNOT00000005144	0.998972	4.2272	9.24371	0.00236306	0.0712416	Slc25a11	ENSRNOG00000003815
9585	ENSRNOT00000073683	-0.462059	6.77756	9.23663	0.00237221	0.0714066	Gtf2f1	ENSRNOG00000047134
12063	ENSRNOT00000090712	0.925805	2.91519	9.23389	0.00237576	0.0714066	Lbr	ENSRNOG00000052574
16589	ENSRNOT00000108795	-0.641775	5.82082	9.22944	0.00238155	0.0714717	Ptpa	ENSRNOG00000018457
14686	ENSRNOT00000101942	-1.03244	2.03399	9.21915	0.00239496	0.0717653	Ppp2ca	ENSRNOG00000005389
8511	ENSRNOT00000061047	-0.532561	9.22148	9.21285	0.00240322	0.0719036	Pcp4	ENSRNOG00000001628
3477	ENSRNOT00000017599	0.555274	5.28067	9.20891	0.0024084	0.0719496	Pcdh8	ENSRNOG00000013101
9129	ENSRNOT00000067907	1.35439	3.78741	9.20389	0.00241502	0.0720052	Tbc1d15	ENSRNOG00000003889
18101	ENSRNOT00000114317	1.0437	3.72504	9.20197	0.00241755	0.0720052	Ddx3	ENSRNOG00000057231
13130	ENSRNOT00000096255	-0.717985	4.94453	9.19163	0.00243125	0.0720659	Laptm4b	ENSRNOG00000006766
13148	ENSRNOT00000096339	0.60537	5.26801	9.19706	0.00242404	0.0720659	Ankrd12	ENSRNOG00000012733
15383	ENSRNOT00000104458	-0.926451	3.3532	9.18941	0.00243419	0.0720659	Bcas3	ENSRNOG00000066893
16686	ENSRNOT00000109157	-0.477241	7.50206	9.19142	0.00243152	0.0720659	Rplp2	ENSRNOG00000068445
11811	ENSRNOT00000089094	0.9098	3.72492	9.17946	0.00244747	0.0723505	Sgcb	ENSRNOG00000002135
4331	ENSRNOT00000021725	-0.493291	6.58866	9.17568	0.00245252	0.0723713	Rpl12	ENSRNOG00000016220
12446	ENSRNOT00000093633	0.535349	5.85182	9.17346	0.0024555	0.0723713	Grm4	ENSRNOG00000000487
3319	ENSRNOT00000016887	0.554687	5.88649	9.16945	0.00246088	0.0723853	Lmbrd1	ENSRNOG00000012178
3403	ENSRNOT00000017269	1.00205	3.14867	9.16765	0.00246331	0.0723853	Tk2	ENSRNOG00000012853
13214	ENSRNOT00000096601	1.11676	1.08651	9.15943	0.0024744	0.0725974	Ndel1	ENSRNOG00000004139
18822	ENSRNOT00000116941	-0.979427	2.72767	9.15686	0.00247788	0.0725974	RGD1311739	ENSRNOG00000021245
8052	ENSRNOT00000054976	0.419335	8.03748	9.14036	0.00250032	0.0728863	Actg1	ENSRNOG00000036701
9609	ENSRNOT00000073918	-0.931923	2.8815	9.14349	0.00249605	0.0728863	Gfy	ENSRNOG00000047401
11214	ENSRNOT00000084985	1.2984	4.95566	9.14125	0.0024991	0.0728863	Sympk	ENSRNOG00000014353
14599	ENSRNOT00000101580	1.11821	2.37533	9.13876	0.0025025	0.0728863	Ppp3cb	ENSRNOG00000054782
13835	ENSRNOT00000098811	1.11647	1.51533	9.1296	0.00251507	0.073037	Pfkfb3	ENSRNOG00000018911
16826	ENSRNOT00000109704	0.571443	5.33353	9.12974	0.00251487	0.073037	Dync1i1	ENSRNOG00000009700
8678	ENSRNOT00000064349	0.89824	4.19264	9.12129	0.00252652	0.0732617	Gns	ENSRNOG00000046159
4084	ENSRNOT00000020509	1.12738	3.83383	9.11102	0.00254074	0.0734816	Zc3h4	ENSRNOG00000015229
18658	ENSRNOT00000116346	-1.47342	2.0125	9.11044	0.00254155	0.0734816	Eml4	ENSRNOG00000030294
504	ENSRNOT00000002500	1.20229	2.9944	9.08858	0.0025721	0.0742563	Med21	ENSRNOG00000001820
16712	ENSRNOT00000109260	-1.31448	1.48707	9.07457	0.00259188	0.0746091	Atg7	ENSRNOG00000007486
18460	ENSRNOT00000115651	-1.22331	2.75522	9.07632	0.0025894	0.0746091	Srek1ip1-ps1	ENSRNOG00000047506
13988	ENSRNOT00000099396	-1.29847	4.19273	9.06632	0.0026036	0.0748373	Ipcef1	ENSRNOG00000018163
3651	ENSRNOT00000018454	1.17919	2.7955	9.06303	0.00260829	0.0748634	Sec61a1	ENSRNOG00000013743
2352	ENSRNOT00000012295	0.548744	6.49788	9.03176	0.00265329	0.0756937	Nptn	ENSRNOG00000009029
4392	ENSRNOT00000022032	0.508768	5.65346	9.03377	0.00265038	0.0756937	Fxyd6	ENSRNOG00000016412
5502	ENSRNOT00000026843	-1.29437	3.34173	9.03092	0.00265451	0.0756937	Sipa1l2	ENSRNOG00000019791
12547	ENSRNOT00000094110	-0.564104	5.22959	9.03577	0.00264748	0.0756937	Deaf1	ENSRNOG00000017960
18753	ENSRNOT00000116670	1.43875	1.88779	9.02963	0.00265639	0.0756937	Pde8b	ENSRNOG00000010280
15977	ENSRNOT00000106534	0.642757	4.67109	9.02338	0.00266548	0.0758432	Plxnc1	ENSRNOG00000007970
9453	ENSRNOT00000072511	1.22019	2.61295	9.00738	0.00268892	0.0762905	Mmab	ENSRNOG00000049426
15571	ENSRNOT00000105084	0.470056	6.61776	9.00901	0.00268652	0.0762905	Cct7	ENSRNOG00000015630
121	ENSRNOT00000000629	0.80114	5.23687	9.00177	0.00269718	0.0763054	Cpne5	ENSRNOG00000000522
12979	ENSRNOT00000095781	0.939649	4.75792	9.00349	0.00269465	0.0763054	Atrx	ENSRNOG00000056703
17711	ENSRNOT00000112890	-0.557089	7.11394	8.99591	0.00270584	0.0764411	Tspan3	ENSRNOG00000016474
9758	ENSRNOT00000075144	-0.438643	7.53101	8.99043	0.00271398	0.0764521	Clasrp	ENSRNOG00000046000
10283	ENSRNOT00000078862	1.1538	1.71504	8.99212	0.00271147	0.0764521	Frem1	ENSRNOG00000022309
8039	ENSRNOT00000054952	-0.674085	4.68114	8.97417	0.00273823	0.0770255	Pcyt2	ENSRNOG00000036684
600	ENSRNOT00000003077	0.880213	3.84681	8.96659	0.00274962	0.0770437	Pdgfra	ENSRNOG00000002244
5141	ENSRNOT00000025394	-0.972734	3.55522	8.96727	0.00274859	0.0770437	Stab1	ENSRNOG00000018434
7939	ENSRNOT00000051565	-1.14248	2.92154	8.96594	0.00275058	0.0770437	Iqce	ENSRNOG00000001241
7869	ENSRNOT00000050556	-0.511081	5.52329	8.952	0.00277167	0.0774146	Gpt	ENSRNOG00000033915
8762	ENSRNOT00000064957	0.86863	3.70075	8.95312	0.00276996	0.0774146	Papola	ENSRNOG00000004827
10421	ENSRNOT00000079678	-0.580042	4.9677	8.93264	0.00280119	0.0780185	Csad	ENSRNOG00000011573
13507	ENSRNOT00000097627	1.41988	0.950317	8.9333	0.00280018	0.0780185	Rmi1	ENSRNOG00000019108
12149	ENSRNOT00000091288	-0.530264	5.9099	8.92578	0.00281173	0.0780577	Ndufa3	ENSRNOG00000060293
12200	ENSRNOT00000091664	-0.677926	4.89058	8.92216	0.00281732	0.0780577	NA	ENSRNOG00000062968
18425	ENSRNOT00000115497	-0.674971	4.95417	8.92226	0.00281716	0.0780577	Gm2a	ENSRNOG00000052219
19662	ENSRNOT00000120063	1.21953	1.62723	8.92145	0.00281841	0.0780577	Usp8	ENSRNOG00000010729
10040	ENSRNOT00000077188	1.10996	0.872576	8.90992	0.00283626	0.0783938	Asah1	ENSRNOG00000010034
12347	ENSRNOT00000092755	-0.643423	5.4027	8.90849	0.00283849	0.0783938	Elovl1	ENSRNOG00000028448
12763	ENSRNOT00000094946	0.747956	4.00128	8.90057	0.00285081	0.0784279	Acap2	ENSRNOG00000001730
16064	ENSRNOT00000106861	1.01097	4.69239	8.90486	0.00284413	0.0784279	Mtss2	ENSRNOG00000017500
18527	ENSRNOT00000115835	-1.12977	1.25757	8.89987	0.00285191	0.0784279	Itgae	ENSRNOG00000070390
19220	ENSRNOT00000118434	-0.570147	5.37534	8.8975	0.00285561	0.0784279	Fastk	ENSRNOG00000011667
6486	ENSRNOT00000033811	0.898702	3.43969	8.89417	0.00286083	0.0784622	Luzp2	ENSRNOG00000021507
3181	ENSRNOT00000016233	0.716633	4.9539	8.88197	0.00288	0.0788784	Dennd6a	ENSRNOG00000011636
13205	ENSRNOT00000096569	-0.793881	5.39507	8.86927	0.00290011	0.0793191	Mast2	ENSRNOG00000058476
14055	ENSRNOT00000099635	-0.536733	5.76735	8.8656	0.00290595	0.0793691	Ndufs7	ENSRNOG00000024568
7779	ENSRNOT00000049536	1.53569	2.00537	8.85183	0.00292795	0.0797841	Stat2	ENSRNOG00000031081
18710	ENSRNOT00000116508	-1.09571	2.74512	8.85103	0.00292923	0.0797841	Pnkp	ENSRNOG00000020318
5207	ENSRNOT00000025664	-0.639436	4.90758	8.81568	0.00298653	0.0805252	Stx5	ENSRNOG00000018847
6880	ENSRNOT00000037974	0.597007	6.47735	8.82681	0.00296836	0.0805252	Map2	ENSRNOG00000011841
7294	ENSRNOT00000042985	1.21416	1.62391	8.81448	0.00298849	0.0805252	Ndufs5-ps2	ENSRNOG00000029339
10672	ENSRNOT00000081344	0.627949	5.12265	8.81413	0.00298906	0.0805252	Lsm14b	ENSRNOG00000054557
12116	ENSRNOT00000091061	-1.24171	1.84066	8.81459	0.00298832	0.0805252	Cpsf3	ENSRNOG00000052418
13784	ENSRNOT00000098632	-1.09675	2.31162	8.83037	0.00296258	0.0805252	Apoo	ENSRNOG00000046918
14595	ENSRNOT00000101563	-0.471563	6.78905	8.82347	0.00297381	0.0805252	Ubl5	ENSRNOG00000069661
18778	ENSRNOT00000116778	0.444847	6.8926	8.82445	0.00297221	0.0805252	Elovl2	ENSRNOG00000014702
19583	ENSRNOT00000119764	1.24504	2.42839	8.81049	0.00299504	0.0805764	Clk4	ENSRNOG00000003714
6185	ENSRNOT00000030461	1.59602	1.76001	8.80591	0.00300256	0.0806687	Jakmip3	ENSRNOG00000027590
16162	ENSRNOT00000107214	-0.777007	4.39738	8.80262	0.00300798	0.0807045	RGD1564162	ENSRNOG00000028386
4543	ENSRNOT00000022714	-0.499454	5.93302	8.79512	0.00302038	0.0809272	Mapk1ip1	ENSRNOG00000016935
10927	ENSRNOT00000083194	-0.834491	3.69896	8.78431	0.00303832	0.0811878	Atg4d	ENSRNOG00000047625
14749	ENSRNOT00000102155	-0.855473	4.86635	8.78586	0.00303574	0.0811878	Fbf1	ENSRNOG00000008577
75	ENSRNOT00000000352	0.830757	3.82937	8.76961	0.0030629	0.0812946	Cd24	ENSRNOG00000000321
5425	ENSRNOT00000026550	-0.804943	3.76957	8.7728	0.00305755	0.0812946	Colq	ENSRNOG00000019615
8889	ENSRNOT00000066028	0.480701	6.69165	8.77555	0.00305294	0.0812946	Ctsa	ENSRNOG00000015857
9269	ENSRNOT00000070984	1.19392	1.90598	8.76977	0.00306263	0.0812946	Tmx3	ENSRNOG00000045740
10724	ENSRNOT00000081747	-0.546324	7.46626	8.77828	0.00304839	0.0812946	Rps8	ENSRNOG00000054626
14364	ENSRNOT00000100697	0.630642	6.05668	8.76314	0.0030738	0.0814742	Slc30a9	ENSRNOG00000002246
17119	ENSRNOT00000110765	0.94869	2.65514	8.75987	0.00307932	0.0815111	NA	ENSRNOG00000063687
2393	ENSRNOT00000012462	-0.469141	6.43501	8.74995	0.00309611	0.0818459	Tbkbp1	ENSRNOG00000009370
11923	ENSRNOT00000089847	-0.424033	7.64517	8.74503	0.00310448	0.0818479	Dkc1	ENSRNOG00000055562
19531	ENSRNOT00000119603	-0.773675	5.46399	8.74647	0.00310202	0.0818479	Vps39	ENSRNOG00000008316
3769	ENSRNOT00000019044	1.15386	4.30999	8.73219	0.00312641	0.0818796	Utp6	ENSRNOG00000014209
8766	ENSRNOT00000064991	1.26266	3.44369	8.73881	0.00311507	0.0818796	Edil3	ENSRNOG00000033064
11467	ENSRNOT00000086721	0.501103	6.06263	8.73287	0.00312523	0.0818796	Gpm6b	ENSRNOG00000004613
16146	ENSRNOT00000107172	1.2974	1.36419	8.73386	0.00312354	0.0818796	Pet100	ENSRNOG00000050169
17399	ENSRNOT00000111694	-0.735023	4.7997	8.74073	0.00311179	0.0818796	Dctn2	ENSRNOG00000025481
13808	ENSRNOT00000098716	-1.09519	2.94769	8.70562	0.00317231	0.0829717	Smtn	ENSRNOG00000019451
13491	ENSRNOT00000097540	-1.44921	2.39389	8.67867	0.00321955	0.0840959	Tmem100	ENSRNOG00000002434
9910	ENSRNOT00000076430	1.08717	3.2257	8.66258	0.0032481	0.084509	Far1	ENSRNOG00000013176
10126	ENSRNOT00000077799	-0.749047	4.56582	8.66253	0.00324821	0.084509	Rnf4	ENSRNOG00000013930
15028	ENSRNOT00000103202	0.459292	7.35673	8.66493	0.00324392	0.084509	Pbx1	ENSRNOG00000070119
10712	ENSRNOT00000081632	-0.468578	6.47966	8.65526	0.00326119	0.0847351	Mroh1	ENSRNOG00000030355
17166	ENSRNOT00000110898	-0.654792	5.88934	8.65134	0.0032682	0.0848058	Cct8	ENSRNOG00000001592
15034	ENSRNOT00000103228	-1.28513	1.72624	8.64503	0.00327955	0.0849887	Ccdc146	ENSRNOG00000012932
2395	ENSRNOT00000012478	-0.448586	6.62037	8.6252	0.00331544	0.0857944	Anp32b	ENSRNOG00000009266
7012	ENSRNOT00000039383	-1.63701	1.60619	8.62306	0.00331934	0.0857944	Cxcl13	ENSRNOG00000024899
4570	ENSRNOT00000022841	1.46695	0.933793	8.60789	0.00334709	0.0863988	Atg13	ENSRNOG00000016984
8465	ENSRNOT00000060461	0.446778	6.42361	8.60253	0.00335696	0.0865404	Pcdhga5	ENSRNOG00000063070
13672	ENSRNOT00000098223	-0.665295	4.30365	8.59473	0.00337137	0.0867015	Ccdc57	ENSRNOG00000047531
17511	ENSRNOT00000112119	1.39176	3.15759	8.59439	0.00337199	0.0867015	Mob1a	ENSRNOG00000059474
158	ENSRNOT00000000824	-0.582471	5.01259	8.55937	0.00343748	0.0877454	Hps4	ENSRNOG00000000661
1494	ENSRNOT00000007687	0.538606	5.74822	8.56394	0.00342887	0.0877454	Rasgrp1	ENSRNOG00000005404
3802	ENSRNOT00000019175	0.864956	3.60817	8.5614	0.00343366	0.0877454	Zdhhc13	ENSRNOG00000014277
13675	ENSRNOT00000098228	-0.473434	6.37734	8.56826	0.00342074	0.0877454	Rap1gap	ENSRNOG00000013825
15592	ENSRNOT00000105155	-0.851407	3.95825	8.56061	0.00343514	0.0877454	Rdh11	ENSRNOG00000054770
16029	ENSRNOT00000106741	-0.588403	4.86629	8.55843	0.00343926	0.0877454	Macrod1	ENSRNOG00000021174
4041	ENSRNOT00000020337	1.09604	3.72557	8.55216	0.00345112	0.0878785	Socs5	ENSRNOG00000028504
16187	ENSRNOT00000107296	1.15387	2.80059	8.55098	0.00345337	0.0878785	Plekha1	ENSRNOG00000020497
19053	ENSRNOT00000117823	-1.14618	1.9474	8.54311	0.00346832	0.0881452	Ndufv3	ENSRNOG00000001182
17926	ENSRNOT00000113737	-0.430428	7.1377	8.52082	0.00351107	0.089117	Serf2	ENSRNOG00000064233
7574	ENSRNOT00000046563	-0.989567	3.01007	8.51261	0.00352694	0.089405	Kctd17	ENSRNOG00000000231
1546	ENSRNOT00000008018	0.893599	4.06544	8.50288	0.00354584	0.0895429	Suox	ENSRNOG00000005987
14296	ENSRNOT00000100423	0.507312	5.67156	8.5067	0.00353841	0.0895429	R3hdm1	ENSRNOG00000004099
16559	ENSRNOT00000108704	0.753857	5.34587	8.50281	0.00354598	0.0895429	Spire1	ENSRNOG00000025324
10623	ENSRNOT00000080990	0.904111	3.02375	8.49525	0.00356075	0.089801	Emd	ENSRNOG00000058882
8954	ENSRNOT00000066589	0.474754	6.62408	8.49083	0.00356941	0.0899045	Hspd1	ENSRNOG00000014525
3362	ENSRNOT00000017096	1.18404	2.6431	8.4779	0.00359488	0.0904282	Rarg	ENSRNOG00000012499
4656	ENSRNOT00000023252	0.427535	7.28967	8.47101	0.00360852	0.0904282	Pfkp	ENSRNOG00000017163
15858	ENSRNOT00000106095	1.11176	1.08176	8.47213	0.00360628	0.0904282	Rpl35	ENSRNOG00000014272
17114	ENSRNOT00000110741	-0.854172	4.51401	8.47478	0.00360103	0.0904282	Swap70	ENSRNOG00000009910
6361	ENSRNOT00000032249	1.00498	0.916741	8.46773	0.00361503	0.0904765	Hcar2	ENSRNOG00000026653
9000	ENSRNOT00000066925	1.12866	1.91642	8.46358	0.00362328	0.0905683	Nln	ENSRNOG00000011561
8577	ENSRNOT00000061883	-0.77721	5.59614	8.45844	0.00363353	0.0907096	Zcchc24	ENSRNOG00000040205
16455	ENSRNOT00000108335	-0.686553	4.67402	8.45128	0.00364787	0.0908379	Grin2b	ENSRNOG00000008766
18868	ENSRNOT00000117115	-0.786519	3.67657	8.45297	0.00364447	0.0908379	Tgoln2	ENSRNOG00000014617
17300	ENSRNOT00000111341	-0.719269	4.86961	8.44438	0.00366173	0.0910683	Arfip2	ENSRNOG00000018440
2842	ENSRNOT00000014645	0.511864	5.45256	8.43181	0.00368713	0.0914695	Irf2bpl	ENSRNOG00000011026
19744	ENSRNOT00000120315	0.487443	6.74645	8.43353	0.00368365	0.0914695	Ankrd28	ENSRNOG00000019697
10833	ENSRNOT00000082484	0.826003	4.89333	8.42308	0.00370488	0.0917946	Smad4	ENSRNOG00000051965
15620	ENSRNOT00000105251	-0.437388	8.86163	8.41744	0.00371638	0.0919642	Zc3h10	ENSRNOG00000040281
7736	ENSRNOT00000048880	0.649535	6.09111	8.40583	0.00374019	0.0924376	Syt1	ENSRNOG00000006426
13239	ENSRNOT00000096675	-0.510183	14.4524	8.40195	0.00374818	0.0925191	Rn18s	ENSRNOG00000068307
16257	ENSRNOT00000107615	0.507535	5.54392	8.39115	0.00377053	0.0929547	Serinc5	ENSRNOG00000024039
8671	ENSRNOT00000064297	0.327156	9.88188	8.37452	0.00380519	0.0936291	Cpe	ENSRNOG00000043387
12454	ENSRNOT00000093706	1.10547	0.847188	8.37291	0.00380855	0.0936291	Robo2	ENSRNOG00000029598
12972	ENSRNOT00000095753	-0.583994	4.87904	8.36895	0.00381686	0.0936291	Kcnj16	ENSRNOG00000004713
16454	ENSRNOT00000108334	-0.665169	4.57844	8.36974	0.00381521	0.0936291	Fam149b1	ENSRNOG00000006554
560	ENSRNOT00000002890	-1.0448	0.890569	8.35465	0.00384702	0.0942521	Paics	ENSRNOG00000002101
3575	ENSRNOT00000018038	-0.46703	7.10977	8.34945	0.00385805	0.0942882	Atp5if1	ENSRNOG00000013300
7363	ENSRNOT00000044017	0.932955	3.29066	8.35063	0.00385553	0.0942882	Atp8a1	ENSRNOG00000034200
18577	ENSRNOT00000116005	-0.711237	6.46089	8.34549	0.00386645	0.0943768	Sh3glb2	ENSRNOG00000017295
13825	ENSRNOT00000098789	0.897863	3.00701	8.33982	0.00387854	0.0945549	Atic	ENSRNOG00000015511
17457	ENSRNOT00000111909	1.04105	2.78865	8.33431	0.00389033	0.0947254	Dusp6	ENSRNOG00000023896
19484	ENSRNOT00000119425	-0.586937	6.46803	8.32977	0.00390005	0.0948453	Sbf1	ENSRNOG00000008392
380	ENSRNOT00000001856	-0.550265	5.22797	8.32458	0.00391122	0.0949997	Rasal1	ENSRNOG00000001374
13384	ENSRNOT00000097117	1.27131	2.08311	8.31798	0.00392545	0.0952283	Afg3l1	ENSRNOG00000026994
17043	ENSRNOT00000110470	0.65115	5.55534	8.30557	0.00395237	0.0957637	Gripap1	ENSRNOG00000009071
7837	ENSRNOT00000050188	-0.458969	6.24873	8.29974	0.00396508	0.095954	Cdk11b	ENSRNOG00000017213
8712	ENSRNOT00000064636	-0.499671	5.82105	8.28697	0.00399306	0.09643	Fbxl5	ENSRNOG00000005261
10925	ENSRNOT00000083173	0.940036	3.72515	8.28631	0.00399452	0.09643	Rassf8	ENSRNOG00000015986
5457	ENSRNOT00000026669	-0.499044	5.4903	8.27625	0.00401669	0.0968469	Smg9	ENSRNOG00000019596
12915	ENSRNOT00000095541	-1.48922	2.62282	8.26865	0.00403354	0.0971346	Eml6	ENSRNOG00000037462
14763	ENSRNOT00000102207	0.579627	5.21805	8.2658	0.00403989	0.097169	Clstn3	ENSRNOG00000011156
2100	ENSRNOT00000011047	-0.963363	4.41821	8.24304	0.00409086	0.0982137	Hnrnpm	ENSRNOG00000007921
10151	ENSRNOT00000077973	0.927311	2.46694	8.23097	0.00411814	0.0982137	Kcnab1	ENSRNOG00000056697
12145	ENSRNOT00000091265	-0.694674	8.33874	8.23508	0.00410884	0.0982137	Dgkz	ENSRNOG00000017737
12437	ENSRNOT00000093558	-0.436219	7.91356	8.23851	0.00410108	0.0982137	Rps16	ENSRNOG00000019578
12644	ENSRNOT00000094457	-0.38967	7.60359	8.23172	0.00411645	0.0982137	LOC100359583	ENSRNOG00000018584
14168	ENSRNOT00000099991	-0.50818	5.8167	8.2415	0.00409432	0.0982137	Rpl21	ENSRNOG00000000957
19219	ENSRNOT00000118428	-0.918772	3.21725	8.23686	0.00410482	0.0982137	Nkd2	ENSRNOG00000016103
1147	ENSRNOT00000005858	0.616708	6.84405	8.22174	0.00413914	0.0985954	Kidins220	ENSRNOG00000023176
4250	ENSRNOT00000021366	-0.524452	5.59183	8.20804	0.00417052	0.0991623	Ube3a	ENSRNOG00000015734
5665	ENSRNOT00000027466	-0.44147	6.88176	8.20697	0.00417298	0.0991623	P4htm	ENSRNOG00000020249
6165	ENSRNOT00000030273	-0.534305	5.9099	8.19896	0.00419145	0.099362	Gng13	ENSRNOG00000039350
12291	ENSRNOT00000092383	-1.05417	3.56508	8.2011	0.0041865	0.099362	Slc26a8	ENSRNOG00000000512
7040	ENSRNOT00000039748	0.850776	3.42815	8.19229	0.00420687	0.0996081	Mex3b	ENSRNOG00000025142
18576	ENSRNOT00000116003	-0.52072	5.68057	8.17981	0.00423591	0.100176	Snn	ENSRNOG00000058739
6231	ENSRNOT00000030926	-0.698177	4.38367	8.16589	0.00426855	0.100827	Ndufv3-ps1	ENSRNOG00000027593
4598	ENSRNOT00000022956	1.22518	2.15982	8.15742	0.00428853	0.100886	Man1c1	ENSRNOG00000017087
8072	ENSRNOT00000055185	1.37381	4.20747	8.15617	0.00429148	0.100886	Tmub2	ENSRNOG00000020916
12418	ENSRNOT00000093378	0.550999	5.26237	8.16036	0.00428158	0.100886	Nipsnap2	ENSRNOG00000023919
13582	ENSRNOT00000097906	1.18292	1.51726	8.15749	0.00428837	0.100886	Dnm1l	ENSRNOG00000001813
14344	ENSRNOT00000100598	-0.825591	5.7493	8.14727	0.0043126	0.101261	Med24	ENSRNOG00000008711
1928	ENSRNOT00000010223	1.13862	0.73781	8.13377	0.00434483	0.101326	Zfp800	ENSRNOG00000007662
12152	ENSRNOT00000091306	-0.468469	6.29824	8.13323	0.00434612	0.101326	Prpf40b	ENSRNOG00000052539
14765	ENSRNOT00000102240	-0.442606	6.63114	8.13551	0.00434066	0.101326	Myo18a	ENSRNOG00000033101
16310	ENSRNOT00000107825	0.708974	4.62251	8.1416	0.0043261	0.101326	Msl1	ENSRNOG00000009643
18501	ENSRNOT00000115756	-0.657555	4.48466	8.14185	0.00432551	0.101326	Rtn2	ENSRNOG00000016603
19373	ENSRNOT00000118981	-0.918906	3.18367	8.13681	0.00433756	0.101326	LOC102552000	ENSRNOG00000068835
13745	ENSRNOT00000098484	-0.622175	5.00325	8.11974	0.00437859	0.101962	Dhrsx	ENSRNOG00000028323
4943	ENSRNOT00000024529	0.828856	4.31555	8.11182	0.00439776	0.102122	Rbm5	ENSRNOG00000018153
7091	ENSRNOT00000040457	-0.623483	4.81993	8.1054	0.00441336	0.102122	Odf2	ENSRNOG00000014584
10239	ENSRNOT00000078589	1.20667	1.51484	8.10596	0.00441201	0.102122	Mtfr2	ENSRNOG00000058050
12010	ENSRNOT00000090388	-0.731466	3.86153	8.10333	0.00441841	0.102122	Trdn	ENSRNOG00000012609
13661	ENSRNOT00000098189	-0.488424	6.07978	8.11372	0.00439315	0.102122	LOC103692795	ENSRNOG00000070619
15851	ENSRNOT00000106074	0.497382	6.31891	8.10655	0.00441056	0.102122	Trim9	ENSRNOG00000007031
16177	ENSRNOT00000107263	-0.585621	6.49051	8.102	0.00442164	0.102122	Rubcn	ENSRNOG00000059880
9217	ENSRNOT00000068535	-1.31291	3.19446	8.09355	0.0044423	0.102153	Pdgfrb	ENSRNOG00000018461
9367	ENSRNOT00000071804	1.17543	1.99657	8.09678	0.00443439	0.102153	Homer1	ENSRNOG00000047014
15236	ENSRNOT00000103864	-1.01069	2.64077	8.09299	0.00444367	0.102153	Fcer1g	ENSRNOG00000024159
15865	ENSRNOT00000106120	-0.489117	6.18325	8.09324	0.00444306	0.102153	Camkk1	ENSRNOG00000018242
4012	ENSRNOT00000020182	0.717704	4.30993	8.08606	0.00446071	0.102187	Sfrp5	ENSRNOG00000014940
12973	ENSRNOT00000095754	0.801479	3.40243	8.08743	0.00445734	0.102187	Itpa	ENSRNOG00000021233
19096	ENSRNOT00000117973	0.982644	2.74162	8.08983	0.00445144	0.102187	Fxr1	ENSRNOG00000051480
10693	ENSRNOT00000081501	-1.01503	5.27382	8.07846	0.00447945	0.102469	Gstm7	ENSRNOG00000018937
15047	ENSRNOT00000103275	0.779277	4.64631	8.07688	0.00448336	0.102469	Cbfa2t2	ENSRNOG00000016352
14270	ENSRNOT00000100335	0.447444	6.70933	8.07087	0.00449825	0.10269	Dync1i1	ENSRNOG00000009700
15627	ENSRNOT00000105269	0.79605	3.37685	8.06672	0.00450856	0.102807	Actr10	ENSRNOG00000007504
13557	ENSRNOT00000097796	1.09453	0.640061	8.05721	0.00453229	0.103229	Mtmr1	ENSRNOG00000002697
5401	ENSRNOT00000026439	-0.422764	6.7993	8.05097	0.00454794	0.103466	Dvl1	ENSRNOG00000019423
879	ENSRNOT00000004601	-1.11443	0.323114	8.0483	0.00455465	0.103499	Klf1	ENSRNOG00000003443
15363	ENSRNOT00000104333	0.607608	5.15182	8.04543	0.00456186	0.103544	Kat2b	ENSRNOG00000011871
14840	ENSRNOT00000102512	-0.582373	4.81842	8.04319	0.0045675	0.103553	Ercc2	ENSRNOG00000017753
7757	ENSRNOT00000049198	-0.972341	0.747974	8.03597	0.00458575	0.103847	Wdr97	ENSRNOG00000033520
15775	ENSRNOT00000105801	-1.0362	1.83999	8.02884	0.00460383	0.104137	Ccdc57	ENSRNOG00000047531
10077	ENSRNOT00000077429	0.867075	3.55838	8.02016	0.00462595	0.104425	Zdhhc21	ENSRNOG00000010484
17347	ENSRNOT00000111538	-0.624848	4.75397	8.01969	0.00462714	0.104425	Pnpo	ENSRNOG00000046493
14274	ENSRNOT00000100343	0.619169	4.68002	8.01122	0.00464884	0.104676	Etfdh	ENSRNOG00000009538
15431	ENSRNOT00000104620	-0.423964	7.70123	8.01324	0.00464366	0.104676	Ncor2	ENSRNOG00000001004
2135	ENSRNOT00000011237	0.44008	6.91163	8.00755	0.00465828	0.104712	Plpp3	ENSRNOG00000008116
14477	ENSRNOT00000101106	-0.403448	9.29535	8.00647	0.00466104	0.104712	Pcp4l1	ENSRNOG00000003209
6601	ENSRNOT00000035060	-0.402297	7.78007	7.99936	0.00467938	0.104769	Map1lc3a	ENSRNOG00000025443
9351	ENSRNOT00000071655	1.08816	0.917368	7.99931	0.00467952	0.104769	Slc35f3	ENSRNOG00000049456
19367	ENSRNOT00000118965	1.36945	2.08868	8.00245	0.00467141	0.104769	NA	ENSRNOG00000067785
6657	ENSRNOT00000035722	0.645561	4.84177	7.99723	0.00468491	0.104771	Adcyap1r1	ENSRNOG00000012098
1070	ENSRNOT00000005535	-0.47129	8.43817	7.99069	0.00470184	0.105031	Eno2	ENSRNOG00000013141
10177	ENSRNOT00000078148	0.912826	3.932	7.98862	0.00470724	0.105033	Mynn	ENSRNOG00000027923
14687	ENSRNOT00000101943	1.01938	1.14716	7.9862	0.00471352	0.105054	Toe1	ENSRNOG00000017561
10660	ENSRNOT00000081249	0.598326	4.83758	7.98286	0.00472223	0.105068	Yme1l1	ENSRNOG00000055012
14487	ENSRNOT00000101131	-1.05104	2.42914	7.98188	0.00472479	0.105068	Acsl4	ENSRNOG00000019180
11787	ENSRNOT00000088928	0.696083	4.27432	7.97788	0.00473524	0.105182	Entpd4	ENSRNOG00000016321
19038	ENSRNOT00000117789	-0.927185	3.25478	7.97344	0.00474687	0.105204	Kcnh6	ENSRNOG00000008078
19089	ENSRNOT00000117956	-1.16829	2.1392	7.97468	0.00474361	0.105204	Csad	ENSRNOG00000011573
19027	ENSRNOT00000117750	-0.785685	3.61077	7.97116	0.00475285	0.105218	NA	ENSRNOG00000063673
1591	ENSRNOT00000008342	0.785319	4.35205	7.96887	0.00475886	0.105233	Slc6a11	ENSRNOG00000005697
4026	ENSRNOT00000020272	1.52532	2.01688	7.96236	0.00477601	0.105376	Slc1a1	ENSRNOG00000014816
11196	ENSRNOT00000084841	-1.24902	3.45273	7.96246	0.00477574	0.105376	Ager	ENSRNOG00000000439
537	ENSRNOT00000002736	0.567819	5.24725	7.95776	0.00478815	0.105511	Ythdc1	ENSRNOG00000001996
1544	ENSRNOT00000007999	0.581334	5.47793	7.95202	0.00480336	0.105511	Azin1	ENSRNOG00000005333
9689	ENSRNOT00000074544	-0.591958	5.25682	7.95198	0.00480347	0.105511	Srrt	ENSRNOG00000048277
14260	ENSRNOT00000100300	-0.44052	6.58778	7.95594	0.00479297	0.105511	Safb2	ENSRNOG00000049511
2569	ENSRNOT00000013378	0.680675	4.57597	7.94797	0.00481413	0.105567	Rabgap1	ENSRNOG00000009402
5582	ENSRNOT00000027145	0.949009	4.38787	7.93863	0.00483905	0.105567	Rbm34	ENSRNOG00000020004
12827	ENSRNOT00000095207	-0.523348	5.96779	7.94024	0.00483474	0.105567	Ano8	ENSRNOG00000058662
12842	ENSRNOT00000095256	0.950881	2.28381	7.94013	0.00483503	0.105567	Sntg1	ENSRNOG00000007294
13173	ENSRNOT00000096437	1.19728	4.13181	7.93697	0.00484347	0.105567	Hmgcr	ENSRNOG00000016122
13787	ENSRNOT00000098638	0.680149	5.37867	7.93728	0.00484265	0.105567	Hip1	ENSRNOG00000001448
15179	ENSRNOT00000103714	1.18353	0.723312	7.93781	0.00484125	0.105567	Zfp260	ENSRNOG00000020762
8539	ENSRNOT00000061249	0.784242	3.58776	7.92482	0.00487611	0.106162	RGD1311345	ENSRNOG00000019232
808	ENSRNOT00000004235	0.946975	2.89649	7.88698	0.00497918	0.107796	RragB	ENSRNOG00000062421
10262	ENSRNOT00000078760	1.03554	1.58827	7.89407	0.0049597	0.107796	Clstn2	ENSRNOG00000043085
10737	ENSRNOT00000081878	1.09616	3.28949	7.88526	0.00498393	0.107796	Cpeb2	ENSRNOG00000005043
14736	ENSRNOT00000102093	-0.423312	8.52111	7.88799	0.00497641	0.107796	Oscp1	ENSRNOG00000026978
14911	ENSRNOT00000102746	-1.42538	2.1344	7.88666	0.00498006	0.107796	Cisd3	ENSRNOG00000036894
15801	ENSRNOT00000105894	-0.492211	5.73711	7.8906	0.00496924	0.107796	Plekhn1	ENSRNOG00000020295
3123	ENSRNOT00000015979	1.19877	0.79056	7.88109	0.00499543	0.107926	Sorcs1	ENSRNOG00000011313
3476	ENSRNOT00000017588	-0.635223	5.14227	7.87821	0.0050034	0.107981	Atox1	ENSRNOG00000013118
348	ENSRNOT00000001732	1.0248	0.857611	7.86849	0.00503037	0.10812	Gper1	ENSRNOG00000001287
2590	ENSRNOT00000013486	0.48907	5.47781	7.86168	0.00504934	0.10812	Ube2g1	ENSRNOG00000010041
9276	ENSRNOT00000071028	-0.830866	3.41706	7.86013	0.00505368	0.10812	AC109542.1	ENSRNOG00000048562
9571	ENSRNOT00000073564	-0.40189	7.76579	7.87384	0.00501552	0.10812	Reep2	ENSRNOG00000049629
10888	ENSRNOT00000082893	0.999137	1.32495	7.86674	0.00503524	0.10812	H2az2	ENSRNOG00000052275
12136	ENSRNOT00000091216	-0.866166	3.265	7.86521	0.0050395	0.10812	Tp53	ENSRNOG00000010756
15964	ENSRNOT00000106479	-0.823407	3.32467	7.86187	0.00504881	0.10812	Ptprm	ENSRNOG00000011700
16294	ENSRNOT00000107742	-0.787935	3.40757	7.86968	0.00502704	0.10812	Acaa1a	ENSRNOG00000032908
8271	ENSRNOT00000057476	1.07236	3.35422	7.85044	0.00508084	0.108275	Gopc	ENSRNOG00000000408
9951	ENSRNOT00000076618	-0.718305	4.00938	7.85223	0.0050758	0.108275	Slfn13	ENSRNOG00000021412
14144	ENSRNOT00000099915	-1.04233	1.69977	7.85427	0.00507009	0.108275	Zhx2	ENSRNOG00000005417
19682	ENSRNOT00000120124	0.656602	4.40495	7.84972	0.00508285	0.108275	Ldb1	ENSRNOG00000018468
3803	ENSRNOT00000019177	-0.431518	6.96724	7.84628	0.00509255	0.108365	Prickle4	ENSRNOG00000014180
884	ENSRNOT00000004619	0.44302	6.69161	7.842	0.00510462	0.108505	Gabrg2	ENSRNOG00000003241
2262	ENSRNOT00000011867	-1.04118	0.342778	7.83423	0.00512661	0.108516	Guca2a	ENSRNOG00000008849
3454	ENSRNOT00000017454	-1.15055	1.46761	7.82054	0.00516557	0.108516	Aspg	ENSRNOG00000012843
3877	ENSRNOT00000019531	-0.512788	5.63723	7.82627	0.00514921	0.108516	Tcp1	ENSRNOG00000014160
4586	ENSRNOT00000022905	0.883261	4.19174	7.82262	0.00515962	0.108516	Plppr5	ENSRNOG00000016878
7372	ENSRNOT00000044145	-1.00896	2.48384	7.82274	0.0051593	0.108516	Yif1b	ENSRNOG00000055286
10062	ENSRNOT00000077331	0.374882	7.93293	7.83121	0.00513518	0.108516	Serpine2	ENSRNOG00000015461
11249	ENSRNOT00000085265	0.357059	9.56895	7.83866	0.00511406	0.108516	Camk2b	ENSRNOG00000052080
12358	ENSRNOT00000092873	-0.441816	6.80598	7.83375	0.00512797	0.108516	Kifc2	ENSRNOG00000060123
13733	ENSRNOT00000098450	-0.906924	3.37144	7.82739	0.00514603	0.108516	Speg	ENSRNOG00000019850
15244	ENSRNOT00000103907	0.80216	3.3087	7.82213	0.00516103	0.108516	Nfe2l1	ENSRNOG00000008830
18266	ENSRNOT00000114920	-0.4683	6.164	7.83279	0.00513069	0.108516	Evi5l	ENSRNOG00000001034
1842	ENSRNOT00000009733	0.775334	4.11526	7.8161	0.00517827	0.108667	Unk	ENSRNOG00000006600
2045	ENSRNOT00000010755	-0.369076	8.04111	7.81286	0.00518756	0.108746	Tspoap1	ENSRNOG00000007957
11158	ENSRNOT00000084661	0.743325	3.8383	7.80913	0.00519828	0.108799	Snx13	ENSRNOG00000004186
17317	ENSRNOT00000111423	0.976953	1.56883	7.80815	0.0052011	0.108799	Actr2	ENSRNOG00000004959
16423	ENSRNOT00000108238	1.22598	1.39774	7.79871	0.00522835	0.109138	Lancl1	ENSRNOG00000013557
17679	ENSRNOT00000112785	-0.435415	6.12582	7.79971	0.00522547	0.109138	Nme1	ENSRNOG00000002693
12371	ENSRNOT00000092968	0.927423	4.73581	7.77696	0.00529168	0.110335	Gpm6a	ENSRNOG00000010731
13515	ENSRNOT00000097665	-0.407096	7.23766	7.77518	0.00529689	0.110335	Nxf1	ENSRNOG00000019069
10311	ENSRNOT00000079005	-1.38786	10.583	7.76492	0.00532705	0.11073	AABR07015057.1	ENSRNOG00000065867
14527	ENSRNOT00000101307	-0.722799	3.98812	7.76613	0.00532349	0.11073	Luc7l3	ENSRNOG00000002835
2103	ENSRNOT00000011054	0.575519	5.92638	7.75988	0.00534197	0.110807	Bsdc1	ENSRNOG00000008338
14241	ENSRNOT00000100238	-0.443646	6.25836	7.76148	0.00533721	0.110807	Pou6f1	ENSRNOG00000070769
15880	ENSRNOT00000106172	-0.485805	6.48169	7.75321	0.00536172	0.1111	Ndufv2	ENSRNOG00000042503
8530	ENSRNOT00000061194	-0.661076	4.09448	7.74276	0.00539285	0.111615	Tektip1	ENSRNOG00000039861
10450	ENSRNOT00000079854	-0.436435	7.76975	7.74106	0.0053979	0.111615	Tubb5	ENSRNOG00000061216
17439	ENSRNOT00000111837	-0.543392	6.66104	7.73824	0.00540636	0.111673	Tom1l2	ENSRNOG00000003590
16157	ENSRNOT00000107204	-0.521708	5.9486	7.73554	0.00541444	0.111723	Efr3a	ENSRNOG00000025528
18018	ENSRNOT00000114050	0.455418	5.79457	7.72952	0.00543251	0.111979	Camk2g	ENSRNOG00000009783
5192	ENSRNOT00000025626	-0.433713	6.80134	7.72383	0.00544967	0.112215	Ccdc124	ENSRNOG00000018932
2329	ENSRNOT00000012195	0.696482	4.06185	7.70836	0.00549658	0.112442	Slitrk1	ENSRNOG00000009209
4429	ENSRNOT00000022196	-0.424158	6.86367	7.70706	0.00550052	0.112442	Edf1	ENSRNOG00000016272
6673	ENSRNOT00000035890	-0.455149	6.39952	7.71255	0.00548383	0.112442	Ndufb7	ENSRNOG00000028717
11025	ENSRNOT00000083848	1.23464	1.65279	7.7173	0.00546942	0.112442	Uhrf1	ENSRNOG00000048411
16129	ENSRNOT00000107115	-0.458763	7.42932	7.70771	0.00549855	0.112442	Grik5	ENSRNOG00000020310
18186	ENSRNOT00000114634	0.893022	3.57649	7.71289	0.0054828	0.112442	Rtn3	ENSRNOG00000021202
19129	ENSRNOT00000118093	1.16653	2.42765	7.70787	0.00549805	0.112442	Mat2b	ENSRNOG00000003177
18782	ENSRNOT00000116791	-0.571812	5.11551	7.69926	0.00552434	0.112812	NA	ENSRNOG00000062927
7175	ENSRNOT00000041473	1.09803	4.51744	7.6957	0.00553525	0.112918	Ppp1r12a	ENSRNOG00000004925
1960	ENSRNOT00000010380	-0.463437	6.13678	7.69273	0.00554437	0.112939	Bloc1s1	ENSRNOG00000007784
19723	ENSRNOT00000120241	-0.465275	5.94431	7.69164	0.00554772	0.112939	Kank3	ENSRNOG00000007230
8601	ENSRNOT00000063858	0.404017	6.8968	7.67781	0.00559039	0.113691	Dcaf7	ENSRNOG00000042245
2163	ENSRNOT00000011340	1.29152	1.16655	7.65876	0.00564973	0.114779	Slc22a5	ENSRNOG00000008432
4917	ENSRNOT00000024414	1.13014	4.05611	7.65647	0.0056569	0.114807	Snrnp27	ENSRNOG00000017838
11822	ENSRNOT00000089149	-1.26051	1.67418	7.64934	0.0056793	0.115025	Qki	ENSRNOG00000048297
12386	ENSRNOT00000093127	0.764317	5.54703	7.64985	0.00567769	0.115025	Clasp1	ENSRNOG00000002376
12159	ENSRNOT00000091330	1.15831	2.60636	7.63571	0.00572237	0.115778	Fgf13	ENSRNOG00000042753
1453	ENSRNOT00000007467	1.43097	2.38856	7.6327	0.00573195	0.115854	Slc6a20a	ENSRNOG00000068642
328	ENSRNOT00000001659	-0.450321	5.94512	7.62955	0.00574195	0.115937	Cabin1	ENSRNOG00000001237
2131	ENSRNOT00000011220	1.32642	2.21993	7.61847	0.00577736	0.116533	Fut8	ENSRNOG00000008451
12604	ENSRNOT00000094318	-0.424758	8.53123	7.61327	0.00579403	0.11675	Ptprn	ENSRNOG00000019587
17148	ENSRNOT00000110844	0.892577	3.29683	7.60705	0.00581406	0.117034	Rapgef6	ENSRNOG00000009995
9165	ENSRNOT00000068150	1.04922	3.8967	7.59772	0.00584421	0.117519	Aqp4	ENSRNOG00000016043
14382	ENSRNOT00000100742	-1.1375	2.09165	7.59592	0.00585006	0.117519	Hmgcs1	ENSRNOG00000016552
3510	ENSRNOT00000017736	-0.657588	4.41541	7.58869	0.00587358	0.117871	Setd7	ENSRNOG00000013045
2991	ENSRNOT00000015363	-0.562575	5.15426	7.56275	0.00595869	0.119337	Lama3	ENSRNOG00000011300
11056	ENSRNOT00000084027	-0.452818	7.08368	7.56413	0.00595413	0.119337	Rps21	ENSRNOG00000060449
2454	ENSRNOT00000012806	0.458446	5.8217	7.55521	0.00598369	0.119474	Hsd17b12	ENSRNOG00000009630
15297	ENSRNOT00000104089	-0.488364	5.7727	7.55541	0.005983	0.119474	B4galnt1	ENSRNOG00000004839
15437	ENSRNOT00000104638	-1.12286	1.87087	7.55586	0.00598154	0.119474	Cacnb4	ENSRNOG00000007666
4982	ENSRNOT00000024711	-0.522468	6.40796	7.553	0.00599101	0.119499	Park7	ENSRNOG00000018289
18198	ENSRNOT00000114672	-0.381003	8.59616	7.5495	0.00600268	0.119611	Rpl23a	ENSRNOG00000023344
18153	ENSRNOT00000114530	-0.420398	7.78064	7.53867	0.00603885	0.120211	Palm	ENSRNOG00000009760
5126	ENSRNOT00000025343	-0.458871	6.39359	7.53533	0.00605007	0.120313	Mobp	ENSRNOG00000018700
13579	ENSRNOT00000097886	-1.02867	2.70921	7.53132	0.00606355	0.120339	Smarcad1	ENSRNOG00000006391
19148	ENSRNOT00000118168	0.918257	3.24037	7.53232	0.00606017	0.120339	Hycc2	ENSRNOG00000025079
16420	ENSRNOT00000108231	-1.30154	3.23151	7.52912	0.00607095	0.120365	Sap30bp	ENSRNOG00000005482
13278	ENSRNOT00000096806	1.15621	1.04429	7.52394	0.00608844	0.12059	Agps	ENSRNOG00000001547
2231	ENSRNOT00000011721	1.12349	1.01278	7.51607	0.00611508	0.120997	Plag1	ENSRNOG00000008846
4933	ENSRNOT00000024460	0.415973	6.46108	7.5132	0.00612486	0.121069	Ipcef1	ENSRNOG00000018163
14444	ENSRNOT00000100990	-0.431554	6.10125	7.50762	0.00614386	0.121323	Lrrfip1	ENSRNOG00000019892
3041	ENSRNOT00000015575	-0.416776	6.89845	7.49229	0.00619636	0.121786	Ube2r2	ENSRNOG00000010727
13291	ENSRNOT00000096855	-1.03749	4.01792	7.49258	0.00619536	0.121786	Wnt5a	ENSRNOG00000015618
14011	ENSRNOT00000099488	1.18837	1.09518	7.49662	0.0061815	0.121786	Elf2	ENSRNOG00000010815
14512	ENSRNOT00000101242	0.710319	4.49293	7.49498	0.00618711	0.121786	NA	ENSRNOG00000070850
19158	ENSRNOT00000118202	0.509948	5.44939	7.49177	0.00619816	0.121786	Rps6kb1	ENSRNOG00000003919
13996	ENSRNOT00000099441	0.654404	4.59225	7.48842	0.00620969	0.121891	Qki	ENSRNOG00000048297
9575	ENSRNOT00000073599	0.854967	4.8143	7.48593	0.0062183	0.121939	Hax1	ENSRNOG00000045647
4550	ENSRNOT00000022747	-0.454329	6.23175	7.47503	0.00625605	0.122558	Uqcr11	ENSRNOG00000016952
13317	ENSRNOT00000096925	0.52195	5.17213	7.47254	0.0062647	0.122606	Itih5	ENSRNOG00000049614
654	ENSRNOT00000003391	0.797142	3.20207	7.4703	0.00627252	0.122637	Insig2	ENSRNOG00000002478
10416	ENSRNOT00000079630	-0.423223	7.05249	7.46567	0.00628866	0.122747	Ank3	ENSRNOG00000053288
16997	ENSRNOT00000110322	-0.468829	8.39069	7.46512	0.00629057	0.122747	Ndrg4	ENSRNOG00000012482
4823	ENSRNOT00000024072	-0.576958	4.74182	7.45843	0.006314	0.122871	Baiap3	ENSRNOG00000017893
10717	ENSRNOT00000081697	-1.19917	0.98294	7.45642	0.00632107	0.122871	Thsd4	ENSRNOG00000053753
11435	ENSRNOT00000086531	-0.490657	5.58871	7.4562	0.00632183	0.122871	Bicdl1	ENSRNOG00000056955
17682	ENSRNOT00000112799	1.20306	2.45331	7.45673	0.00631996	0.122871	Dpp10	ENSRNOG00000002595
10979	ENSRNOT00000083553	-0.568147	4.91223	7.45313	0.00633263	0.12296	Dnttip1	ENSRNOG00000014933
19238	ENSRNOT00000118504	0.623777	4.94369	7.44657	0.00635575	0.123288	Fmn2	ENSRNOG00000061764
1400	ENSRNOT00000007175	-0.305044	10.6753	7.44448	0.00636312	0.12331	Cst3	ENSRNOG00000005195
16046	ENSRNOT00000106800	-0.360593	8.0447	7.44255	0.00636996	0.123321	Nisch	ENSRNOG00000018823
15216	ENSRNOT00000103809	0.582981	5.37816	7.43847	0.0063844	0.12348	Dhx15	ENSRNOG00000003844
740	ENSRNOT00000003859	0.642719	5.06046	7.43363	0.00640159	0.12357	Ppm1e	ENSRNOG00000024730
3823	ENSRNOT00000019265	1.08869	3.9126	7.43464	0.006398	0.12357	Arpc2	ENSRNOG00000014289
17215	ENSRNOT00000111042	-1.13967	2.13035	7.41922	0.00645307	0.124442	Cd59	ENSRNOG00000042821
17719	ENSRNOT00000112920	-0.581814	5.5768	7.41272	0.00647644	0.124771	Adgrl3	ENSRNOG00000030149
11533	ENSRNOT00000087142	-0.423667	6.2268	7.40741	0.00649559	0.124775	Phkg2	ENSRNOG00000018725
15742	ENSRNOT00000105691	-0.857438	3.67648	7.4081	0.00649308	0.124775	Rpf2	ENSRNOG00000000587
17069	ENSRNOT00000110572	1.01815	2.36624	7.40823	0.00649261	0.124775	Zbtb26	ENSRNOG00000009346
8517	ENSRNOT00000061123	1.52976	2.04506	7.40206	0.00651493	0.125025	Rpp14	ENSRNOG00000039829
15352	ENSRNOT00000104288	0.793351	3.684	7.39726	0.00653234	0.125237	Ndufs1	ENSRNOG00000011849
8043	ENSRNOT00000054958	0.508944	5.71161	7.39549	0.00653878	0.125239	P4hb	ENSRNOG00000036689
5304	ENSRNOT00000026102	-0.42008	6.40613	7.39281	0.0065485	0.125304	Pelp1	ENSRNOG00000019268
13777	ENSRNOT00000098608	0.434926	6.07724	7.38872	0.00656341	0.125467	LOC120100659	ENSRNOG00000062864
3266	ENSRNOT00000016625	0.635584	4.70267	7.3781	0.00660227	0.125772	Zbtb38	ENSRNOG00000012386
4173	ENSRNOT00000020926	-0.331121	9.96937	7.37741	0.00660481	0.125772	Ptgds	ENSRNOG00000015550
11614	ENSRNOT00000087768	-0.415993	7.18	7.37922	0.00659818	0.125772	Elob	ENSRNOG00000004814
19655	ENSRNOT00000120049	-0.723103	3.91994	7.37782	0.0066033	0.125772	Ttll5	ENSRNOG00000009318
109	ENSRNOT00000000553	-0.427042	6.37034	7.35629	0.00668284	0.126109	Pfdn6	ENSRNOG00000000473
625	ENSRNOT00000003228	-0.415134	6.6786	7.36795	0.00663967	0.126109	Rnf112	ENSRNOG00000002364
3566	ENSRNOT00000018009	-0.38809	7.40567	7.36381	0.00665497	0.126109	Prkcsh	ENSRNOG00000013360
4305	ENSRNOT00000021613	-0.542067	5.2664	7.36043	0.0066675	0.126109	Ccdc106	ENSRNOG00000015997
5564	ENSRNOT00000027073	-0.388435	8.58981	7.35557	0.00668553	0.126109	Uba52	ENSRNOG00000019971
5729	ENSRNOT00000027730	-0.418752	6.51238	7.35344	0.00669347	0.126109	Matk	ENSRNOG00000020431
8797	ENSRNOT00000065281	0.399654	7.68761	7.36328	0.00665693	0.126109	Klc1	ENSRNOG00000011572
12401	ENSRNOT00000093254	0.564394	5.03603	7.36229	0.0066606	0.126109	Phf20l1	ENSRNOG00000005486
14340	ENSRNOT00000100582	-1.15987	1.9912	7.35221	0.00669802	0.126109	Svil	ENSRNOG00000018110
17109	ENSRNOT00000110730	0.844622	3.15796	7.3519	0.00669917	0.126109	Snrnp48	ENSRNOG00000013756
17554	ENSRNOT00000112285	1.25369	2.79018	7.35405	0.00669119	0.126109	Usp48	ENSRNOG00000013602
18650	ENSRNOT00000116318	0.866367	3.76331	7.36804	0.00663931	0.126109	Fam219a	ENSRNOG00000039559
9969	ENSRNOT00000076732	-0.440798	5.91263	7.34864	0.00671135	0.126178	Las1l	ENSRNOG00000021748
16211	ENSRNOT00000107404	0.740291	3.94618	7.34749	0.00671563	0.126178	RGD1559441	ENSRNOG00000067162
14398	ENSRNOT00000100805	0.36052	8.1503	7.33513	0.006762	0.126929	Ogt	ENSRNOG00000003359
10092	ENSRNOT00000077543	0.786554	3.28311	7.32703	0.00679251	0.127381	Atl2	ENSRNOG00000006523
6239	ENSRNOT00000031007	-0.535593	4.86428	7.31978	0.00681996	0.127429	Ube2m	ENSRNOG00000027514
7002	ENSRNOT00000039281	-0.433376	6.11569	7.31942	0.00682134	0.127429	Cabp1	ENSRNOG00000001173
13009	ENSRNOT00000095857	1.05475	1.14068	7.31784	0.00682735	0.127429	NA	ENSRNOG00000065781
15371	ENSRNOT00000104384	-1.09041	0.163947	7.32111	0.00681494	0.127429	Ptcra	ENSRNOG00000042581
15892	ENSRNOT00000106208	-0.719011	4.32766	7.32116	0.00681475	0.127429	Ttc7a	ENSRNOG00000014879
1069	ENSRNOT00000005532	0.457028	6.23477	7.30776	0.00686573	0.127772	Cep170	ENSRNOG00000004127
12574	ENSRNOT00000094196	1.14112	2.20141	7.30623	0.0068716	0.127772	Lpgat1	ENSRNOG00000004402
14190	ENSRNOT00000100067	0.925429	2.62349	7.3076	0.00686636	0.127772	Arl8b	ENSRNOG00000055860
16548	ENSRNOT00000108669	-0.459693	7.03867	7.30927	0.00685997	0.127772	Rab7a	ENSRNOG00000012247
5928	ENSRNOT00000028540	-0.373154	7.83808	7.28371	0.00695828	0.129262	Car11	ENSRNOG00000021017
12998	ENSRNOT00000095830	0.600865	4.48989	7.27461	0.00699362	0.129796	Srsf3	ENSRNOG00000000520
1080	ENSRNOT00000005584	1.22688	2.56536	7.27126	0.00700666	0.129863	Sybu	ENSRNOG00000004200
1622	ENSRNOT00000008573	-0.469002	6.83409	7.2703	0.0070104	0.129863	Plekhg3	ENSRNOG00000006570
1483	ENSRNOT00000007621	0.474437	6.63106	7.25481	0.00707112	0.130865	Ppp2ca	ENSRNOG00000005389
14065	ENSRNOT00000099656	-0.742935	3.82512	7.2483	0.00709681	0.131095	Tbc1d25	ENSRNOG00000005303
15099	ENSRNOT00000103468	0.671699	4.03263	7.24906	0.0070938	0.131095	Zfp958	ENSRNOG00000065430
3842	ENSRNOT00000019367	-0.435763	6.08918	7.23545	0.00714777	0.131913	Klf9	ENSRNOG00000014215
5110	ENSRNOT00000025282	-0.522876	6.74687	7.22599	0.00718554	0.132078	Ppp1ca	ENSRNOG00000018708
7480	ENSRNOT00000045357	0.710414	5.39364	7.22511	0.00718909	0.132078	Efr3a	ENSRNOG00000025528
8128	ENSRNOT00000055862	1.02868	3.75481	7.22428	0.00719239	0.132078	Wdr47	ENSRNOG00000020330
8226	ENSRNOT00000056964	-0.494272	5.26851	7.22274	0.00719856	0.132078	Fam98c	ENSRNOG00000024036
9577	ENSRNOT00000073634	-0.747101	3.75526	7.22151	0.00720353	0.132078	Nelfcd	ENSRNOG00000047874
15556	ENSRNOT00000105031	0.433854	6.81196	7.22412	0.00719303	0.132078	Clk1	ENSRNOG00000025768
16571	ENSRNOT00000108738	0.999861	0.844767	7.23102	0.00716547	0.132078	Sorcs1	ENSRNOG00000011313
16071	ENSRNOT00000106886	-0.616557	6.41784	7.21401	0.00723367	0.132505	Chgb	ENSRNOG00000021269
17800	ENSRNOT00000113267	0.998608	1.21915	7.21238	0.00724023	0.132505	Lss	ENSRNOG00000054549
8590	ENSRNOT00000063781	0.943076	2.90463	7.20498	0.00727015	0.132899	Lman2l	ENSRNOG00000015699
17976	ENSRNOT00000113905	-0.418735	6.61313	7.20374	0.0072752	0.132899	Ssbp4	ENSRNOG00000019698
5375	ENSRNOT00000026335	-1.09838	1.65244	7.19513	0.00731015	0.133414	Med11	ENSRNOG00000019384
6092	ENSRNOT00000029565	0.974705	2.67001	7.19187	0.00732347	0.133533	Rictor	ENSRNOG00000011341
430	ENSRNOT00000002116	-0.437892	7.17391	7.18899	0.00733521	0.133624	Atp5pf	ENSRNOG00000001551
5930	ENSRNOT00000028544	0.491226	5.46133	7.17794	0.00738055	0.134326	Mag	ENSRNOG00000021023
13383	ENSRNOT00000097114	-0.986886	2.55519	7.17298	0.00740096	0.134481	Cir1	ENSRNOG00000018719
18752	ENSRNOT00000116669	-1.02325	0.685485	7.17256	0.00740271	0.134481	6330411D24Rik	ENSRNOG00000065736
13298	ENSRNOT00000096880	-0.464085	5.47291	7.16628	0.00742865	0.134829	Pmm2	ENSRNOG00000002615
633	ENSRNOT00000003265	0.46505	5.73736	7.15937	0.00745733	0.135225	Itm2a	ENSRNOG00000002365
10986	ENSRNOT00000083579	0.429982	6.41805	7.15194	0.00748831	0.135662	Clcn3	ENSRNOG00000010682
14329	ENSRNOT00000100548	1.06366	4.1023	7.14877	0.00750153	0.135741	Gfm2	ENSRNOG00000025285
18897	ENSRNOT00000117243	0.410998	7.34773	7.1476	0.00750643	0.135741	Fabp7	ENSRNOG00000000814
14442	ENSRNOT00000100987	-0.761682	3.42969	7.14567	0.00751451	0.135741	Zcchc17	ENSRNOG00000012266
18723	ENSRNOT00000116578	0.620107	4.39343	7.14432	0.00752018	0.135741	Saraf	ENSRNOG00000012329
19461	ENSRNOT00000119345	-0.719416	3.64179	7.13998	0.00753842	0.135946	Sync	ENSRNOG00000008118
17884	ENSRNOT00000113578	-0.482173	6.23006	7.13141	0.00757453	0.136473	Rbm25	ENSRNOG00000002874
1242	ENSRNOT00000006329	0.586562	6.28607	7.11863	0.00762869	0.137074	Napb	ENSRNOG00000004753
5460	ENSRNOT00000026696	0.766385	5.00518	7.11886	0.00762772	0.137074	Hspa9	ENSRNOG00000019525
12384	ENSRNOT00000093119	-1.32972	3.78242	7.12068	0.00761999	0.137074	Dnajc11	ENSRNOG00000008802
4488	ENSRNOT00000022485	-0.409052	6.89492	7.11271	0.00765394	0.137341	Ngef	ENSRNOG00000016653
6332	ENSRNOT00000031977	1.26373	2.08418	7.11188	0.00765746	0.137341	Smpd3	ENSRNOG00000000257
5870	ENSRNOT00000028262	-0.410537	6.54002	7.09601	0.00772556	0.137935	Ltbp3	ENSRNOG00000020813
10877	ENSRNOT00000082757	1.06481	2.25218	7.09918	0.00771191	0.137935	Rasgrf1	ENSRNOG00000014025
13689	ENSRNOT00000098287	-0.623556	5.66474	7.09701	0.00772127	0.137935	Tnrc18	ENSRNOG00000024482
13722	ENSRNOT00000098391	0.988792	1.63647	7.09818	0.00771621	0.137935	Csnk1g3	ENSRNOG00000016677
16435	ENSRNOT00000108276	-0.441054	6.39939	7.0944	0.0077325	0.137935	Hdac11	ENSRNOG00000006824
18547	ENSRNOT00000115899	0.936011	5.21162	7.09963	0.00771001	0.137935	Magi2	ENSRNOG00000013962
5266	ENSRNOT00000025925	0.743872	4.20177	7.09079	0.0077481	0.137961	Slc25a17	ENSRNOG00000018920
17588	ENSRNOT00000112421	0.517378	5.73277	7.08921	0.00775493	0.137961	Scg2	ENSRNOG00000015055
19691	ENSRNOT00000120151	-1.21932	2.20875	7.09126	0.00774609	0.137961	Adam9	ENSRNOG00000017231
15793	ENSRNOT00000105860	-0.59446	4.39155	7.08632	0.00776746	0.13806	Ppp1r1a	ENSRNOG00000036827
7062	ENSRNOT00000040015	-0.531925	4.95819	7.07943	0.00779738	0.138218	Znhit1	ENSRNOG00000001418
12897	ENSRNOT00000095475	-0.770114	3.53531	7.08064	0.00779212	0.138218	Ncoa4	ENSRNOG00000063221
18096	ENSRNOT00000114309	0.904276	2.51251	7.08153	0.00778827	0.138218	Tbccd1	ENSRNOG00000026458
5816	ENSRNOT00000028060	-0.39953	7.64272	7.07754	0.00780559	0.138239	Rpl27	ENSRNOG00000020674
7100	ENSRNOT00000040525	1.1738	1.93004	7.06374	0.00786597	0.139184	Adam23	ENSRNOG00000012424
6997	ENSRNOT00000039258	-0.570663	4.7313	7.05684	0.00789631	0.139596	Zmynd10	ENSRNOG00000021602
16749	ENSRNOT00000109364	-0.823203	3.15503	7.05254	0.0079153	0.139806	Tmod1	ENSRNOG00000009761
17799	ENSRNOT00000113266	0.49496	5.78144	7.03784	0.00798052	0.140832	NA	ENSRNOG00000065188
14537	ENSRNOT00000101332	0.591458	4.63155	7.03255	0.00800413	0.141123	Rbm33	ENSRNOG00000006718
9079	ENSRNOT00000067542	-0.428387	6.59649	7.03069	0.00801246	0.141144	Nfe2l1	ENSRNOG00000008830
16731	ENSRNOT00000109314	0.546678	5.77032	7.02775	0.00802559	0.141249	Sri	ENSRNOG00000049780
12745	ENSRNOT00000094881	-0.747644	3.65493	7.02381	0.00804331	0.141435	Tes	ENSRNOG00000051952
1574	ENSRNOT00000008227	0.979635	1.25042	7.02006	0.00806017	0.141484	Tspyl5	ENSRNOG00000006278
19745	ENSRNOT00000120320	0.969592	1.24871	7.02	0.00806043	0.141484	Cdc37l1	ENSRNOG00000010967
1405	ENSRNOT00000007218	0.693415	4.71257	7.00854	0.00811219	0.142014	Slc4a10	ENSRNOG00000005307
3042	ENSRNOT00000015578	-0.336986	9.10427	7.01007	0.00810527	0.142014	Adgrb1	ENSRNOG00000029450
18138	ENSRNOT00000114457	0.940211	0.823888	7.0105	0.00810332	0.142014	Psma3	ENSRNOG00000007851
11672	ENSRNOT00000088152	0.735712	3.80456	7.00368	0.00813422	0.142273	Tfg	ENSRNOG00000001633
1205	ENSRNOT00000006144	-0.637628	4.72786	7.00013	0.00815037	0.142429	Dync2i1	ENSRNOG00000004520
8814	ENSRNOT00000065393	-0.38462	7.23104	6.99444	0.00817635	0.14273	Ctbp1	ENSRNOG00000005428
11140	ENSRNOT00000084568	0.62084	4.75861	6.99319	0.00818203	0.14273	Cnot10	ENSRNOG00000052305
19598	ENSRNOT00000119825	1.04287	0.531732	6.99022	0.00819565	0.142841	Slc24a5	ENSRNOG00000005158
6461	ENSRNOT00000033537	-0.430657	7.2572	6.98625	0.00821381	0.143032	Atp5mf	ENSRNOG00000027049
209	ENSRNOT00000001133	-0.573293	6.88501	6.98454	0.00822168	0.143043	Prrc2a	ENSRNOG00000000852
16523	ENSRNOT00000108572	-1.41293	0.699391	6.97946	0.00824505	0.143323	Msl3l2	ENSRNOG00000000801
7286	ENSRNOT00000042903	0.444677	6.23218	6.97422	0.00826921	0.14349	Zfp266	ENSRNOG00000034037
9223	ENSRNOT00000068606	0.559256	4.63592	6.97428	0.00826896	0.14349	Rnf13	ENSRNOG00000029209
1246	ENSRNOT00000006349	0.827964	3.60332	6.95083	0.00837802	0.143884	Ano3	ENSRNOG00000004731
3644	ENSRNOT00000018422	0.793839	4.22663	6.95923	0.00833878	0.143884	Ercc3	ENSRNOG00000013180
4230	ENSRNOT00000021221	-0.448066	5.9225	6.95221	0.00837156	0.143884	Snrpd2	ENSRNOG00000015844
5964	ENSRNOT00000028675	0.977617	0.826054	6.95856	0.00834191	0.143884	Susd5	ENSRNOG00000026951
8791	ENSRNOT00000065211	-1.2218	4.39313	6.94948	0.00838436	0.143884	Hdgf	ENSRNOG00000042261
9443	ENSRNOT00000072464	-0.517965	5.37776	6.95844	0.00834248	0.143884	Romo1	ENSRNOG00000045555
11880	ENSRNOT00000089551	0.929985	2.48547	6.96453	0.00831412	0.143884	Zfp622	ENSRNOG00000010589
12659	ENSRNOT00000094508	0.931851	1.87035	6.94899	0.00838664	0.143884	Dnajc10	ENSRNOG00000006803
13356	ENSRNOT00000097033	-0.408238	7.17694	6.95776	0.00834565	0.143884	Atp6v1fnb	ENSRNOG00000063021
14886	ENSRNOT00000102674	-0.684827	4.44117	6.95025	0.00838076	0.143884	Fxyd1	ENSRNOG00000021079
16084	ENSRNOT00000106938	0.929589	1.44591	6.9658	0.00830825	0.143884	Piga	ENSRNOG00000003554
16334	ENSRNOT00000107920	0.976333	0.665218	6.95589	0.00835437	0.143884	Traf7	ENSRNOG00000003131
19494	ENSRNOT00000119465	-0.463126	6.37114	6.95627	0.0083526	0.143884	Tma7	ENSRNOG00000047225
5212	ENSRNOT00000025693	0.907504	0.854544	6.94553	0.00840289	0.144038	Adamts12	ENSRNOG00000018865
18569	ENSRNOT00000115984	-0.956959	3.7826	6.9432	0.00841383	0.144101	Smu1	ENSRNOG00000007671
11355	ENSRNOT00000085938	0.542798	6.29414	6.94152	0.00842176	0.144111	Epb41l1	ENSRNOG00000057817
10298	ENSRNOT00000078971	1.01555	0.22499	6.93941	0.00843167	0.144156	Slc25a15	ENSRNOG00000011881
16689	ENSRNOT00000109167	-0.560201	5.40202	6.93274	0.00846318	0.144569	Ulk1	ENSRNOG00000037505
2954	ENSRNOT00000015213	1.01538	2.78522	6.92448	0.00850236	0.145113	Aimp1	ENSRNOG00000011384
7101	ENSRNOT00000040540	-0.54408	7.12944	6.91366	0.00855398	0.145764	Ndrg2	ENSRNOG00000010389
9797	ENSRNOT00000075474	1.64674	3.05391	6.9134	0.00855524	0.145764	Ptprd	ENSRNOG00000005711
10242	ENSRNOT00000078600	-1.06065	0.149628	6.90971	0.00857291	0.145939	LOC100361913	ENSRNOG00000056651
1253	ENSRNOT00000006369	0.851297	4.77126	6.90059	0.00861673	0.146181	Sec23a	ENSRNOG00000004657
5161	ENSRNOT00000025506	0.899517	2.80687	6.90399	0.00860037	0.146181	Slc30a5	ENSRNOG00000018746
17372	ENSRNOT00000111610	1.04187	0.58063	6.90122	0.00861369	0.146181	LOC360998	ENSRNOG00000062590
18199	ENSRNOT00000114675	-0.43265	7.13168	6.90078	0.00861581	0.146181	Atxn2l	ENSRNOG00000018686
969	ENSRNOT00000005050	-0.912858	0.575346	6.89464	0.00864546	0.146228	Chrne	ENSRNOG00000003777
4530	ENSRNOT00000022650	-0.850198	3.37038	6.89549	0.00864132	0.146228	Use1	ENSRNOG00000016619
10527	ENSRNOT00000080351	-0.395718	6.59308	6.89605	0.00863864	0.146228	Cenpb	ENSRNOG00000057284
13058	ENSRNOT00000096014	-1.07362	0.927032	6.89389	0.00864911	0.146228	Ftl1-ps14	ENSRNOG00000065602
5250	ENSRNOT00000025859	-0.77556	3.8289	6.87956	0.00871873	0.146812	Myh7b	ENSRNOG00000018997
5815	ENSRNOT00000028057	0.623497	4.25886	6.87995	0.00871678	0.146812	Pbxip1	ENSRNOG00000020673
12187	ENSRNOT00000091543	1.13598	2.73806	6.88384	0.00869783	0.146812	Mknk1	ENSRNOG00000010381
18079	ENSRNOT00000114247	-0.556796	4.79551	6.8803	0.00871508	0.146812	Smpd4	ENSRNOG00000001875
18265	ENSRNOT00000114912	-1.1767	2.29807	6.87913	0.00872082	0.146812	Gsn	ENSRNOG00000018991
8371	ENSRNOT00000058906	0.838353	3.24559	6.87043	0.00876336	0.147258	Tle1	ENSRNOG00000005882
10475	ENSRNOT00000079999	1.37398	3.71228	6.87063	0.00876239	0.147258	Ptprs	ENSRNOG00000047247
11510	ENSRNOT00000087011	0.500578	5.10711	6.86914	0.00876969	0.147258	Jak2	ENSRNOG00000059968
1124	ENSRNOT00000005746	0.745041	4.21031	6.86366	0.00879664	0.147585	Timp3	ENSRNOG00000004303
12088	ENSRNOT00000090872	-0.7285	4.01093	6.86047	0.00881234	0.147723	Plaat3	ENSRNOG00000021206
14619	ENSRNOT00000101657	0.852205	4.53442	6.84863	0.00887094	0.148453	Enpp2	ENSRNOG00000004089
18337	ENSRNOT00000115181	-0.75732	4.6915	6.84912	0.00886849	0.148453	Plch2	ENSRNOG00000014226
7830	ENSRNOT00000050090	-0.752568	3.60663	6.83538	0.00893694	0.149304	Tmem258b	ENSRNOG00000032740
15242	ENSRNOT00000103892	-0.695717	4.73527	6.83659	0.00893092	0.149304	Uso1	ENSRNOG00000002301
3284	ENSRNOT00000016739	0.630263	5.09618	6.83149	0.00895645	0.149378	Abcd3	ENSRNOG00000011929
18736	ENSRNOT00000116611	0.773719	3.93637	6.83222	0.00895277	0.149378	Dusp11	ENSRNOG00000045539
4407	ENSRNOT00000022095	-0.487436	7.94173	6.82846	0.00897165	0.149505	Clu	ENSRNOG00000016460
6261	ENSRNOT00000031191	0.675548	3.92516	6.82179	0.00900521	0.149938	Usp15	ENSRNOG00000023202
3797	ENSRNOT00000019158	-0.590958	4.28672	6.8189	0.0090198	0.150054	Ggact	ENSRNOG00000027040
190	ENSRNOT00000001079	0.394691	7.90333	6.8157	0.00903598	0.150197	Fabp7	ENSRNOG00000000814
908	ENSRNOT00000004764	1.03173	4.18296	6.81137	0.00905794	0.150337	Efemp1	ENSRNOG00000003553
9656	ENSRNOT00000074255	-0.447683	6.61014	6.81103	0.00905964	0.150337	Tceal3	ENSRNOG00000046390
13153	ENSRNOT00000096357	-1.20473	1.84223	6.80946	0.0090676	0.150342	Oxr1	ENSRNOG00000056487
16532	ENSRNOT00000108594	-1.07366	1.25421	6.80495	0.00909055	0.150597	Tex264	ENSRNOG00000013201
1606	ENSRNOT00000008471	0.439166	5.6922	6.80034	0.00911405	0.150859	Kitlg	ENSRNOG00000005386
619	ENSRNOT00000003192	1.08985	0.716742	6.79403	0.00914632	0.151014	Mospd1	ENSRNOG00000066239
17332	ENSRNOT00000111470	-0.498341	5.25242	6.79657	0.00913333	0.151014	Ppdpf	ENSRNOG00000012722
17942	ENSRNOT00000113790	0.991199	2.88205	6.795	0.00914134	0.151014	Ptk2	ENSRNOG00000007916
15130	ENSRNOT00000103560	-0.543904	5.09006	6.78789	0.00917785	0.151408	NA	ENSRNOG00000070264
18372	ENSRNOT00000115315	0.62319	4.22268	6.77638	0.00923723	0.15226	Ttc14	ENSRNOG00000011261
10003	ENSRNOT00000076957	-0.51462	5.23603	6.7744	0.00924747	0.152302	Med12	ENSRNOG00000003848
10532	ENSRNOT00000080379	-0.974949	5.01845	6.76841	0.00927856	0.152686	Ptpra	ENSRNOG00000021223
1353	ENSRNOT00000006906	-0.490809	5.25774	6.75377	0.009355	0.153654	Sec61g	ENSRNOG00000005203
14799	ENSRNOT00000102359	-0.441963	6.05112	6.75268	0.00936072	0.153654	Prpf19	ENSRNOG00000020897
17758	ENSRNOT00000113122	-0.760315	3.37535	6.75512	0.00934792	0.153654	Ubxn4	ENSRNOG00000003625
13650	ENSRNOT00000098153	-0.57838	5.15625	6.74569	0.00939747	0.154129	Rab4a	ENSRNOG00000017467
4877	ENSRNOT00000024270	0.662439	3.92389	6.73999	0.00942754	0.154238	Sike1	ENSRNOG00000017502
7937	ENSRNOT00000051554	0.578724	4.49347	6.74059	0.00942432	0.154238	Vamp3	ENSRNOG00000030055
8192	ENSRNOT00000056551	1.18748	1.67075	6.74252	0.00941417	0.154238	Xaf1	ENSRNOG00000037371
4519	ENSRNOT00000022622	-1.03529	1.33227	6.73492	0.00945434	0.154421	Lrrc36	ENSRNOG00000016854
6159	ENSRNOT00000030221	-0.619871	4.27932	6.73511	0.00945332	0.154421	LOC100360828	ENSRNOG00000023086
12108	ENSRNOT00000091004	0.594283	5.56516	6.73126	0.00947375	0.15461	Gnai1	ENSRNOG00000057096
1175	ENSRNOT00000005977	-0.389993	6.88053	6.72578	0.00950293	0.154632	Cep131	ENSRNOG00000004430
7234	ENSRNOT00000042177	-0.418237	6.51025	6.72889	0.00948637	0.154632	LOC100359668	ENSRNOG00000033776
9535	ENSRNOT00000073209	-0.651125	4.75253	6.72369	0.00951405	0.154632	Itgae	ENSRNOG00000046639
14790	ENSRNOT00000102316	-0.825138	4.40927	6.72365	0.00951426	0.154632	Nfat5	ENSRNOG00000011879
18957	ENSRNOT00000117440	-0.841671	3.16779	6.7273	0.0094948	0.154632	Zfp644	ENSRNOG00000002112
6640	ENSRNOT00000035542	1.34518	3.01916	6.71338	0.00956924	0.15527	Rft1	ENSRNOG00000021805
18638	ENSRNOT00000116260	-0.614569	4.71783	6.7144	0.00956376	0.15527	Sec31a	ENSRNOG00000002251
12290	ENSRNOT00000092379	0.905311	2.39431	6.71119	0.00958096	0.155333	Lrrtm4	ENSRNOG00000021938
12608	ENSRNOT00000094330	-0.58989	4.56775	6.70803	0.00959795	0.15548	Pycr3	ENSRNOG00000021638
11144	ENSRNOT00000084590	1.80225	3.03151	6.70479	0.00961545	0.155636	Dis3l2	ENSRNOG00000018931
4499	ENSRNOT00000022527	0.910615	2.76103	6.70116	0.00963503	0.155806	LOC102547287	ENSRNOG00000016462
9532	ENSRNOT00000073157	-0.614664	4.52103	6.69992	0.00964172	0.155806	Pin4	ENSRNOG00000050051
205	ENSRNOT00000001123	-0.564386	4.84133	6.69344	0.00967685	0.156246	Csnk2b	ENSRNOG00000000847
14358	ENSRNOT00000100658	0.928958	2.07707	6.68592	0.00971775	0.156778	NA	ENSRNOG00000064084
8416	ENSRNOT00000059577	-0.404067	6.11525	6.68073	0.00974609	0.156885	Acd	ENSRNOG00000038973
16714	ENSRNOT00000109265	-0.443224	7.0399	6.68174	0.00974055	0.156885	LOC100362479	ENSRNOG00000067741
18676	ENSRNOT00000116394	-0.537663	6.58336	6.68034	0.00974823	0.156885	Gnb2	ENSRNOG00000001409
1462	ENSRNOT00000007519	-0.941627	0.332112	6.67238	0.00979186	0.15694	Misp3	ENSRNOG00000005619
7333	ENSRNOT00000043626	-0.363313	7.20428	6.67245	0.00979148	0.15694	Cacna1h	ENSRNOG00000033893
11493	ENSRNOT00000086890	-0.680795	3.72086	6.66669	0.00982315	0.15694	Fuz	ENSRNOG00000053084
11745	ENSRNOT00000088622	0.436635	5.70046	6.67163	0.00979597	0.15694	Mlf2	ENSRNOG00000016589
14640	ENSRNOT00000101728	-0.97652	0.559648	6.67094	0.00979976	0.15694	NA	ENSRNOG00000070895
15338	ENSRNOT00000104232	0.907792	1.82108	6.66701	0.00982138	0.15694	LOC102554315	ENSRNOG00000067071
15940	ENSRNOT00000106408	-0.901014	6.2511	6.67777	0.00976226	0.15694	Rasa3	ENSRNOG00000017671
17891	ENSRNOT00000113602	-0.420479	6.17188	6.66803	0.00981576	0.15694	Elavl3	ENSRNOG00000013752
18282	ENSRNOT00000114986	0.955148	4.08746	6.66783	0.00981686	0.15694	Rasgrp1	ENSRNOG00000005404
10069	ENSRNOT00000077368	0.935695	3.28475	6.6648	0.00983357	0.156979	Stam	ENSRNOG00000060817
9591	ENSRNOT00000073718	0.644057	4.37189	6.65827	0.00986966	0.157313	Etl4	ENSRNOG00000008666
18037	ENSRNOT00000114100	0.744628	3.90543	6.65814	0.00987038	0.157313	Map3k1	ENSRNOG00000013177
7819	ENSRNOT00000049957	0.59948	6.40977	6.6551	0.00988724	0.157454	Snrnp70	ENSRNOG00000020763
4112	ENSRNOT00000020635	-0.420253	7.88946	6.65294	0.00989925	0.157519	Rpl13	ENSRNOG00000015335
9132	ENSRNOT00000067920	0.503821	5.12401	6.64742	0.00992992	0.157879	Reep3	ENSRNOG00000000645
12530	ENSRNOT00000094024	0.417584	6.31397	6.64585	0.00993868	0.157891	Marchf6	ENSRNOG00000011066
10168	ENSRNOT00000078073	0.451785	5.39028	6.64128	0.00996423	0.158115	Gls	ENSRNOG00000056246
11696	ENSRNOT00000088314	-0.729175	3.43634	6.64047	0.00996876	0.158115	Med20	ENSRNOG00000013852
13149	ENSRNOT00000096341	-0.72396	4.32013	6.63645	0.00999126	0.158345	Etl4	ENSRNOG00000008666
5081	ENSRNOT00000025158	1.48204	3.11857	6.63367	0.0100069	0.158465	Gpr155	ENSRNOG00000018485
38	ENSRNOT00000000157	0.656936	4.67576	6.62457	0.0100581	0.158546	Pik3r3	ENSRNOG00000000145
1148	ENSRNOT00000005861	-0.689291	4.55317	6.63037	0.0100254	0.158546	Togaram1	ENSRNOG00000004415
4490	ENSRNOT00000022487	-0.419656	7.3738	6.62933	0.0100313	0.158546	Cox5b	ENSRNOG00000016660
8841	ENSRNOT00000065600	0.944571	3.41053	6.62618	0.0100491	0.158546	Ttc3	ENSRNOG00000001682
12532	ENSRNOT00000094035	1.03857	1.50101	6.62421	0.0100602	0.158546	Bnip3	ENSRNOG00000017243
19711	ENSRNOT00000120197	1.0555	1.34725	6.62608	0.0100496	0.158546	Set	ENSRNOG00000025892
5498	ENSRNOT00000026821	-0.397391	6.26787	6.61902	0.0100895	0.158882	Isyna1	ENSRNOG00000019741
927	ENSRNOT00000004854	0.892878	1.06375	6.61713	0.0101002	0.158924	Tab3	ENSRNOG00000003643
1465	ENSRNOT00000007535	-1.09738	0.939929	6.61205	0.0101291	0.158928	Il27ra	ENSRNOG00000005729
10317	ENSRNOT00000079031	-0.621562	5.47827	6.61476	0.0101137	0.158928	Kcnip1	ENSRNOG00000005365
14468	ENSRNOT00000101069	-0.64569	4.7914	6.61295	0.010124	0.158928	Bcas1	ENSRNOG00000012906
15688	ENSRNOT00000105474	0.841321	2.96053	6.61142	0.0101327	0.158928	Leprot	ENSRNOG00000050849
19355	ENSRNOT00000118922	0.910171	5.03323	6.60227	0.0101849	0.15962	Nsg1	ENSRNOG00000005700
11972	ENSRNOT00000090152	1.02415	1.55826	6.59514	0.0102258	0.160133	Fnip2	ENSRNOG00000027833
5566	ENSRNOT00000027076	-0.38605	6.75912	6.5894	0.0102588	0.160466	Scand1	ENSRNOG00000019987
7407	ENSRNOT00000044466	-0.697419	3.571	6.58863	0.0102632	0.160466	Ptprt	ENSRNOG00000032656
10467	ENSRNOT00000079965	1.06312	1.25948	6.58691	0.0102732	0.160494	Trpc1	ENSRNOG00000054902
13476	ENSRNOT00000097484	-0.671168	3.86465	6.58396	0.0102901	0.160632	Atp9b	ENSRNOG00000032039
10170	ENSRNOT00000078077	-1.28828	2.86056	6.58068	0.0103091	0.160766	Galnt11	ENSRNOG00000008117
10996	ENSRNOT00000083642	-0.748897	3.90953	6.57967	0.010315	0.160766	Kcnn2	ENSRNOG00000016675
899	ENSRNOT00000004723	0.94914	2.52018	6.5776	0.010327	0.160826	Pggt1b	ENSRNOG00000003541
8735	ENSRNOT00000064779	0.763056	4.02405	6.5719	0.0103601	0.161088	Gabra2	ENSRNOG00000002349
11605	ENSRNOT00000087662	-0.514977	5.38591	6.5727	0.0103555	0.161088	Gpd1	ENSRNOG00000056457
2032	ENSRNOT00000010691	-0.791703	3.30126	6.5642	0.010405	0.161278	Tp53i13	ENSRNOG00000022615
7833	ENSRNOT00000050142	0.922103	2.04635	6.56526	0.0103989	0.161278	Cd47	ENSRNOG00000001964
12919	ENSRNOT00000095555	-0.829679	4.33113	6.5647	0.0104021	0.161278	Ehbp1	ENSRNOG00000008917
13613	ENSRNOT00000098033	0.958826	0.700975	6.56584	0.0103954	0.161278	C2h3orf33	ENSRNOG00000021324
8113	ENSRNOT00000055615	0.499378	6.81597	6.5544	0.0104625	0.162042	Ank2	ENSRNOG00000011076
18522	ENSRNOT00000115817	0.963697	1.72395	6.54501	0.0105179	0.162771	Nfya	ENSRNOG00000012702
8953	ENSRNOT00000066586	-0.929352	1.515	6.53352	0.010586	0.16357	F12	ENSRNOG00000015139
14660	ENSRNOT00000101829	0.830876	3.55546	6.53398	0.0105833	0.16357	Cacnb4	ENSRNOG00000007666
8424	ENSRNOT00000059780	0.441666	6.01359	6.53066	0.0106031	0.163705	Pank3	ENSRNOG00000007419
1308	ENSRNOT00000006646	-1.44196	1.39885	6.52301	0.0106488	0.163963	Scn3a	ENSRNOG00000005007
4729	ENSRNOT00000023582	0.576128	4.65431	6.52394	0.0106432	0.163963	Tubb2a	ENSRNOG00000017558
5095	ENSRNOT00000025217	-0.347165	8.0664	6.52092	0.0106613	0.163963	Rpl17	ENSRNOG00000018680
7904	ENSRNOT00000051134	-0.397929	7.26743	6.52149	0.0106579	0.163963	LOC100361854	ENSRNOG00000029512
9199	ENSRNOT00000068431	1.34773	3.84409	6.52495	0.0106372	0.163963	Tmem164	ENSRNOG00000012787
9647	ENSRNOT00000074177	-1.19816	1.95125	6.51627	0.0106892	0.164265	Sgce	ENSRNOG00000046905
10000	ENSRNOT00000076948	-0.735997	3.63144	6.49823	0.0107982	0.165681	Nae1	ENSRNOG00000033133
16726	ENSRNOT00000109301	0.777708	2.88652	6.49955	0.0107902	0.165681	Mex3d	ENSRNOG00000030830
8906	ENSRNOT00000066139	1.08263	0.537139	6.49425	0.0108224	0.165923	Kank4	ENSRNOG00000007779
4396	ENSRNOT00000022049	1.50644	2.89358	6.49012	0.0108476	0.166181	Apba2	ENSRNOG00000016358
3561	ENSRNOT00000017984	1.08769	4.95309	6.48587	0.0108736	0.166388	Setx	ENSRNOG00000013491
5547	ENSRNOT00000027033	-0.44724	5.65036	6.48514	0.010878	0.166388	Ino80e	ENSRNOG00000019960
693	ENSRNOT00000003605	0.469007	5.31887	6.4733	0.0109507	0.166701	Lamc1	ENSRNOG00000002680
4582	ENSRNOT00000022892	0.422461	7.94113	6.47868	0.0109176	0.166701	Atp5f1a	ENSRNOG00000017032
6747	ENSRNOT00000036658	1.12309	2.8564	6.47083	0.0109659	0.166701	Gpbp1	ENSRNOG00000013002
8753	ENSRNOT00000064903	-0.429633	6.04148	6.47307	0.0109521	0.166701	Commd4	ENSRNOG00000018671
8828	ENSRNOT00000065497	-0.437055	5.80653	6.4719	0.0109593	0.166701	Pink1	ENSRNOG00000015385
11019	ENSRNOT00000083788	1.00291	2.32118	6.4738	0.0109476	0.166701	Zfp14	ENSRNOG00000030932
11989	ENSRNOT00000090262	0.632043	4.32878	6.47607	0.0109337	0.166701	Rpa1	ENSRNOG00000003123
18318	ENSRNOT00000115122	0.506336	5.23508	6.4747	0.0109421	0.166701	Sorbs2	ENSRNOG00000013391
10684	ENSRNOT00000081443	-0.513678	5.22179	6.46822	0.010982	0.16674	Zbtb20	ENSRNOG00000056716
14541	ENSRNOT00000101351	1.58464	4.46788	6.46657	0.0109922	0.16674	Copb2	ENSRNOG00000060723
16982	ENSRNOT00000110253	-0.610571	4.63315	6.46631	0.0109938	0.16674	Tcap	ENSRNOG00000068106
4270	ENSRNOT00000021475	-1.13853	1.38378	6.46321	0.0110131	0.166903	Dcp1a	ENSRNOG00000016015
3807	ENSRNOT00000019189	0.394009	6.313	6.45947	0.0110363	0.167127	Kif2a	ENSRNOG00000014000
6896	ENSRNOT00000038138	-0.378237	6.70533	6.45795	0.0110457	0.167141	Drap1	ENSRNOG00000020527
10783	ENSRNOT00000082159	0.679544	3.53479	6.45005	0.0110949	0.167713	LOC100359876	ENSRNOG00000056398
19746	ENSRNOT00000120322	-0.365991	7.6201	6.44916	0.0111005	0.167713	P3h3	ENSRNOG00000071218
3905	ENSRNOT00000019650	0.52276	5.35405	6.44686	0.0111149	0.167803	Pgc	ENSRNOG00000014492
9071	ENSRNOT00000067491	-0.931369	1.93066	6.44533	0.0111244	0.167818	Med30	ENSRNOG00000004844
8067	ENSRNOT00000055120	0.537432	4.95305	6.4391	0.0111635	0.16818	Pik3c2a	ENSRNOG00000020479
18666	ENSRNOT00000116359	-0.505423	5.48223	6.4388	0.0111654	0.16818	Gpr137	ENSRNOG00000021145
5448	ENSRNOT00000026633	0.371825	6.93613	6.43418	0.0111945	0.168489	Cd9	ENSRNOG00000019556
1634	ENSRNOT00000008677	0.433964	5.51548	6.42584	0.0112471	0.168524	Tmem106b	ENSRNOG00000006206
8304	ENSRNOT00000057978	0.814811	3.42311	6.42436	0.0112565	0.168524	Spart	ENSRNOG00000014155
11828	ENSRNOT00000089193	-0.555803	5.57299	6.425	0.0112525	0.168524	Ndufa9	ENSRNOG00000061684
13174	ENSRNOT00000096458	-0.475633	5.43529	6.42567	0.0112483	0.168524	NA	ENSRNOG00000065335
14511	ENSRNOT00000101232	-1.24216	1.46726	6.42969	0.0112228	0.168524	Cdc27	ENSRNOG00000005904
16380	ENSRNOT00000108079	0.909628	0.751703	6.42798	0.0112336	0.168524	Ppfia2	ENSRNOG00000004353
19718	ENSRNOT00000120214	0.396993	7.02846	6.42709	0.0112393	0.168524	Elmo2	ENSRNOG00000018747
649	ENSRNOT00000003346	1.15459	1.66895	6.42078	0.0112792	0.168583	G3bp2	ENSRNOG00000002433
4204	ENSRNOT00000021075	-0.41786	5.86224	6.41444	0.0113196	0.168583	Mrps34	ENSRNOG00000015479
4973	ENSRNOT00000024677	1.17869	3.88172	6.41434	0.0113202	0.168583	Gas6	ENSRNOG00000018233
11358	ENSRNOT00000085966	-0.995683	1.40275	6.4145	0.0113192	0.168583	Aldh1l1	ENSRNOG00000047023
11532	ENSRNOT00000087134	-0.367677	9.96115	6.41597	0.0113099	0.168583	Gad1	ENSRNOG00000000007
13412	ENSRNOT00000097220	-0.397011	7.14081	6.42067	0.01128	0.168583	Rpl18	ENSRNOG00000021035
14101	ENSRNOT00000099765	-1.22756	1.67508	6.41166	0.0113373	0.168583	Adam22	ENSRNOG00000042478
14674	ENSRNOT00000101890	-0.66935	4.70367	6.41275	0.0113304	0.168583	Amigo3	ENSRNOG00000064183
18482	ENSRNOT00000115701	-1.1143	0.140407	6.41375	0.011324	0.168583	NA	ENSRNOG00000069378
3232	ENSRNOT00000016432	0.386406	6.98277	6.40347	0.0113897	0.169235	Rab7a	ENSRNOG00000012247
1502	ENSRNOT00000007738	1.17918	2.85622	6.39599	0.0114379	0.169456	Pde4b	ENSRNOG00000005905
5731	ENSRNOT00000027737	-0.438898	5.53868	6.39582	0.0114389	0.169456	Mrpl54	ENSRNOG00000020464
17760	ENSRNOT00000113130	0.478944	5.28696	6.39721	0.01143	0.169456	Pcdh10	ENSRNOG00000031974
18882	ENSRNOT00000117173	-0.876611	1.73144	6.39818	0.0114237	0.169456	Lmcd1	ENSRNOG00000005690
7828	ENSRNOT00000050063	1.0055	1.19335	6.39213	0.0114628	0.169682	LOC100910979	ENSRNOG00000019542
15030	ENSRNOT00000103212	-0.693892	4.73488	6.38968	0.0114786	0.169788	Tjap1	ENSRNOG00000018980
959	ENSRNOT00000005006	0.423223	5.84509	6.38376	0.0115169	0.169847	Tmem163	ENSRNOG00000003769
1066	ENSRNOT00000005519	0.863168	3.67614	6.3845	0.0115121	0.169847	Samd14	ENSRNOG00000004155
9587	ENSRNOT00000073687	0.974279	4.69875	6.38644	0.0114995	0.169847	Casd1	ENSRNOG00000047453
15359	ENSRNOT00000104320	-1.00492	3.45508	6.38444	0.0115125	0.169847	Iqsec1	ENSRNOG00000060350
11483	ENSRNOT00000086841	0.427594	5.75388	6.38068	0.0115369	0.170014	Rfx7	ENSRNOG00000060367
10302	ENSRNOT00000078980	0.716177	3.57677	6.37371	0.0115823	0.170466	Morc2	ENSRNOG00000019624
11364	ENSRNOT00000085991	1.02606	4.31577	6.37033	0.0116044	0.170466	Clock	ENSRNOG00000002175
16235	ENSRNOT00000107527	0.688286	4.09753	6.37323	0.0115855	0.170466	Nsd1	ENSRNOG00000016680
17221	ENSRNOT00000111058	-0.926967	1.70723	6.3715	0.0115967	0.170466	AABR07040864.1	ENSRNOG00000050960
19119	ENSRNOT00000118057	-1.08109	4.70161	6.36936	0.0116107	0.170466	Plcg1	ENSRNOG00000051490
5615	ENSRNOT00000027251	-0.967363	1.18198	6.36442	0.0116431	0.170771	Tnfrsf4	ENSRNOG00000020106
16785	ENSRNOT00000109493	1.05413	2.2271	6.36356	0.0116488	0.170771	Hmbox1	ENSRNOG00000013326
535	ENSRNOT00000002727	0.357255	7.88421	6.35333	0.0117161	0.1708	Atp6v1a	ENSRNOG00000001992
1536	ENSRNOT00000007957	1.0273	0.293679	6.35284	0.0117194	0.1708	Grin3a	ENSRNOG00000005723
4016	ENSRNOT00000020207	0.949557	2.51735	6.347	0.011758	0.1708	Zfp483	ENSRNOG00000014975
4506	ENSRNOT00000022557	0.966571	1.78258	6.35832	0.0116832	0.1708	Dgat2	ENSRNOG00000016573
9203	ENSRNOT00000068459	0.597666	7.00019	6.35025	0.0117365	0.1708	Ttyh1	ENSRNOG00000032699
10087	ENSRNOT00000077502	1.62474	2.00148	6.34466	0.0117735	0.1708	Prkag1	ENSRNOG00000061499
11260	ENSRNOT00000085332	0.635202	4.32984	6.35122	0.01173	0.1708	Cab39	ENSRNOG00000017297
12461	ENSRNOT00000093758	0.985891	3.48815	6.34361	0.0117805	0.1708	Cdc42se1	ENSRNOG00000060538
12721	ENSRNOT00000094744	-1.21486	4.48089	6.3565	0.0116952	0.1708	Cadps	ENSRNOG00000008570
15887	ENSRNOT00000106195	-0.402248	7.35044	6.35727	0.0116901	0.1708	Stip1	ENSRNOG00000021164
16199	ENSRNOT00000107367	0.534787	4.61747	6.34788	0.0117521	0.1708	Rnf170	ENSRNOG00000069749
16246	ENSRNOT00000107568	1.25672	2.92997	6.34371	0.0117798	0.1708	Pnrc2	ENSRNOG00000009248
17130	ENSRNOT00000110796	-0.494715	5.49937	6.3499	0.0117388	0.1708	Ythdc1	ENSRNOG00000001996
18257	ENSRNOT00000114885	1.21877	1.97453	6.35635	0.0116962	0.1708	Wdr20	ENSRNOG00000007333
19702	ENSRNOT00000120168	-0.867886	1.92292	6.3453	0.0117693	0.1708	Cbx5	ENSRNOG00000036841
13230	ENSRNOT00000096646	-1.04226	2.13334	6.3382	0.0118165	0.171196	Arhgef3	ENSRNOG00000014363
1467	ENSRNOT00000007544	-0.554483	4.52639	6.32938	0.0118754	0.171904	Fmc1	ENSRNOG00000005618
6218	ENSRNOT00000030825	0.791499	3.68915	6.32439	0.0119089	0.171904	Ncbp1	ENSRNOG00000023605
7524	ENSRNOT00000046010	-0.341413	7.96889	6.32472	0.0119066	0.171904	Rps18l1	ENSRNOG00000033152
12804	ENSRNOT00000095119	1.09799	2.72349	6.32698	0.0118914	0.171904	Myt1l	ENSRNOG00000004269
17162	ENSRNOT00000110888	-0.694915	5.64918	6.32695	0.0118917	0.171904	Setd5	ENSRNOG00000007472
3626	ENSRNOT00000018326	0.729012	3.27755	6.31936	0.0119427	0.172149	Creb1	ENSRNOG00000013412
10673	ENSRNOT00000081351	0.468701	5.37472	6.31927	0.0119433	0.172149	Olfml1	ENSRNOG00000056562
2994	ENSRNOT00000015367	0.885275	2.01824	6.31326	0.0119838	0.172436	Fgf9	ENSRNOG00000011471
8845	ENSRNOT00000065642	0.884368	1.74351	6.31244	0.0119894	0.172436	Tll1	ENSRNOG00000033528
9561	ENSRNOT00000073429	0.856927	4.87853	6.31329	0.0119836	0.172436	Rpn1	ENSRNOG00000046345
3774	ENSRNOT00000019057	0.543806	4.55584	6.30594	0.0120334	0.172718	Lhfpl6	ENSRNOG00000014153
5689	ENSRNOT00000027575	0.901281	3.63652	6.30438	0.012044	0.172718	Nup98	ENSRNOG00000020347
15327	ENSRNOT00000104209	0.369733	6.94154	6.30309	0.0120528	0.172718	Nudt4	ENSRNOG00000009094
16915	ENSRNOT00000110006	0.421619	6.03529	6.30759	0.0120222	0.172718	Arfgef1	ENSRNOG00000005703
19521	ENSRNOT00000119573	0.588513	4.38235	6.3043	0.0120445	0.172718	Gcnt1	ENSRNOG00000062686
14924	ENSRNOT00000102801	1.08615	0.741701	6.29851	0.012084	0.17304	Cbll1	ENSRNOG00000007253
10649	ENSRNOT00000081191	0.995315	0.236175	6.29362	0.0121173	0.173392	Mefv	ENSRNOG00000008134
1350	ENSRNOT00000006897	0.646279	3.6791	6.28259	0.012193	0.173945	Vstm2a	ENSRNOG00000005180
3539	ENSRNOT00000017889	0.968793	1.30917	6.28157	0.0122	0.173945	Kbtbd8	ENSRNOG00000013390
12984	ENSRNOT00000095791	0.79022	3.05685	6.2826	0.0121929	0.173945	Zfp746	ENSRNOG00000007064
14522	ENSRNOT00000101288	-0.374642	6.88107	6.28466	0.0121788	0.173945	NA	ENSRNOG00000068140
19473	ENSRNOT00000119382	1.00489	2.44231	6.28423	0.0121817	0.173945	RGD1306556	ENSRNOG00000052424
628	ENSRNOT00000003240	0.818199	2.93374	6.27957	0.0122137	0.173953	Gabrg1	ENSRNOG00000002360
9122	ENSRNOT00000067854	-0.355967	7.83116	6.27765	0.012227	0.173953	Dynlrb1	ENSRNOG00000025715
16131	ENSRNOT00000107118	0.964851	0.69804	6.27844	0.0122215	0.173953	Proser1	ENSRNOG00000010980
6010	ENSRNOT00000028839	0.914194	0.966903	6.2697	0.012282	0.174118	Slc4a11	ENSRNOG00000021234
8574	ENSRNOT00000061858	0.963855	2.49594	6.27132	0.0122707	0.174118	Reln	ENSRNOG00000021441
13705	ENSRNOT00000098344	-0.368617	7.07035	6.27252	0.0122625	0.174118	NA	ENSRNOG00000068569
13725	ENSRNOT00000098403	-0.348217	8.83457	6.27074	0.0122748	0.174118	Eno2	ENSRNOG00000013141
18439	ENSRNOT00000115562	1.23916	0.834463	6.2696	0.0122827	0.174118	NA	ENSRNOG00000069893
7436	ENSRNOT00000044827	0.718161	4.12469	6.26416	0.0123205	0.174229	Add3	ENSRNOG00000012820
10065	ENSRNOT00000077356	-0.306855	8.78024	6.26652	0.012304	0.174229	Gabarapl1	ENSRNOG00000053362
14413	ENSRNOT00000100868	0.765454	2.90259	6.26339	0.0123258	0.174229	Fcho2	ENSRNOG00000015334
17739	ENSRNOT00000113037	0.645428	3.91181	6.2637	0.0123237	0.174229	Srpra	ENSRNOG00000010543
9527	ENSRNOT00000073125	-1.01465	1.49324	6.26083	0.0123436	0.174356	Aldh2	ENSRNOG00000037815
1126	ENSRNOT00000005762	0.415528	6.69817	6.25803	0.0123631	0.174436	Cdk17	ENSRNOG00000004148
9706	ENSRNOT00000074644	0.641493	4.0153	6.25748	0.012367	0.174436	Larp7	ENSRNOG00000048989
11648	ENSRNOT00000088002	0.734938	3.52793	6.24321	0.012467	0.175722	Clip1	ENSRNOG00000001247
1032	ENSRNOT00000005346	-0.398713	6.52818	6.23068	0.0125556	0.176717	Pfdn2	ENSRNOG00000066932
10105	ENSRNOT00000077646	1.00229	1.0107	6.23186	0.0125472	0.176717	Lmbrd2	ENSRNOG00000054751
1365	ENSRNOT00000006957	1.1706	2.39246	6.21297	0.0126818	0.177894	Rtn4	ENSRNOG00000004621
3136	ENSRNOT00000016042	-0.530452	5.01994	6.21263	0.0126842	0.177894	Las1l	ENSRNOG00000021748
8089	ENSRNOT00000055302	0.55441	4.90132	6.21302	0.0126814	0.177894	Pcbp2	ENSRNOG00000036852
9496	ENSRNOT00000072911	-0.474105	5.90744	6.21665	0.0126554	0.177894	Ranbp3	ENSRNOG00000049785
16317	ENSRNOT00000107851	0.887172	3.03281	6.21536	0.0126647	0.177894	Cacnb4	ENSRNOG00000007666
10059	ENSRNOT00000077321	-0.385461	6.21075	6.20807	0.0127169	0.178226	Pxdn	ENSRNOG00000060614
5190	ENSRNOT00000025624	-0.441176	5.71211	6.20183	0.0127618	0.17864	Hapln2	ENSRNOG00000018870
8804	ENSRNOT00000065314	-0.578308	4.45127	6.2009	0.0127685	0.17864	Mapkapk5	ENSRNOG00000001345
15974	ENSRNOT00000106523	-0.507874	4.88064	6.2002	0.0127736	0.17864	LOC100910678	ENSRNOG00000070474
5567	ENSRNOT00000027083	-0.38903	6.6836	6.19801	0.0127894	0.178735	Rhot2	ENSRNOG00000019930
4388	ENSRNOT00000022003	1.0212	0.601324	6.19248	0.0128294	0.179077	Ust	ENSRNOG00000016381
14214	ENSRNOT00000100148	-1.22596	1.20085	6.19212	0.012832	0.179077	NA	ENSRNOG00000068238
6513	ENSRNOT00000034074	-0.456878	5.56422	6.18492	0.0128843	0.17968	Mrps21	ENSRNOG00000024845
12679	ENSRNOT00000094548	-0.550574	4.89191	6.18059	0.0129159	0.179993	Rab4b	ENSRNOG00000001500
13430	ENSRNOT00000097305	-0.412746	6.45154	6.17843	0.0129317	0.180087	Zfp219	ENSRNOG00000011544
126	ENSRNOT00000000639	-0.973283	0.92332	6.17542	0.0129537	0.180266	Ccdc167	ENSRNOG00000068717
17995	ENSRNOT00000113970	0.806875	2.71226	6.16876	0.0130025	0.180691	Mapre3	ENSRNOG00000008961
18320	ENSRNOT00000115128	1.21268	3.88628	6.16985	0.0129945	0.180691	Col11a2	ENSRNOG00000000463
14082	ENSRNOT00000099700	-1.09926	4.21463	6.16588	0.0130238	0.180858	Suclg1	ENSRNOG00000005587
8166	ENSRNOT00000056217	-0.952254	1.99686	6.16168	0.0130547	0.18116	Rskr	ENSRNOG00000011887
10296	ENSRNOT00000078967	-0.915701	1.65095	6.1595	0.0130708	0.181257	AABR07061825.2	ENSRNOG00000059964
3290	ENSRNOT00000016768	0.454473	5.53633	6.15749	0.0130857	0.181335	Plk2	ENSRNOG00000011951
10315	ENSRNOT00000079023	-0.718363	3.29501	6.15496	0.0131044	0.181468	Galk2	ENSRNOG00000009289
923	ENSRNOT00000004836	-0.394051	7.79989	6.15104	0.0131335	0.181552	Atp5pd	ENSRNOG00000003626
2525	ENSRNOT00000013224	0.390234	6.28003	6.14586	0.013172	0.181552	Tmem59	ENSRNOG00000009778
3623	ENSRNOT00000018318	0.413749	5.8894	6.14548	0.0131748	0.181552	S1pr1	ENSRNOG00000013683
6859	ENSRNOT00000037756	-0.786132	5.07713	6.14634	0.0131685	0.181552	Mast3	ENSRNOG00000022753
10272	ENSRNOT00000078816	-0.370519	7.38179	6.14939	0.0131457	0.181552	Phldb1	ENSRNOG00000026985
12246	ENSRNOT00000091990	-0.411536	6.30858	6.1462	0.0131695	0.181552	Mark2	ENSRNOG00000021184
15505	ENSRNOT00000104862	-0.990691	1.60811	6.15075	0.0131356	0.181552	Fntb	ENSRNOG00000007660
15207	ENSRNOT00000103788	-0.530744	6.0874	6.14243	0.0131975	0.181738	Psmb1	ENSRNOG00000001488
3357	ENSRNOT00000017076	0.678193	3.92011	6.13769	0.013233	0.182043	Arhgap29	ENSRNOG00000012563
9923	ENSRNOT00000076488	-0.844634	1.61635	6.137	0.0132381	0.182043	NA	ENSRNOG00000069006
12498	ENSRNOT00000093884	1.00846	1.67014	6.13293	0.0132687	0.182336	Mus81	ENSRNOG00000020617
9061	ENSRNOT00000067420	0.627162	4.37098	6.13037	0.0132879	0.182473	Usp28	ENSRNOG00000007325
4819	ENSRNOT00000024036	0.934993	2.02355	6.12512	0.0133274	0.182508	Lrif1	ENSRNOG00000017784
5908	ENSRNOT00000028438	-0.394081	6.26018	6.12538	0.0133255	0.182508	Psenen	ENSRNOG00000020941
6170	ENSRNOT00000030329	-0.545163	4.61658	6.12724	0.0133114	0.182508	Plagl1	ENSRNOG00000025587
14622	ENSRNOT00000101663	-0.643418	4.42872	6.12704	0.013313	0.182508	Actn2	ENSRNOG00000017833
714	ENSRNOT00000003714	0.894505	1.13791	6.11488	0.0134048	0.183441	Zdhhc15	ENSRNOG00000002751
14346	ENSRNOT00000100614	0.797188	3.9384	6.11238	0.0134239	0.183574	Tfe3	ENSRNOG00000009605
1349	ENSRNOT00000006887	-0.404805	6.3931	6.10727	0.0134627	0.183616	Nop10	ENSRNOG00000005184
1985	ENSRNOT00000010508	-0.74438	3.39064	6.10584	0.0134736	0.183616	Klhl23	ENSRNOG00000007981
4338	ENSRNOT00000021750	0.377045	7.27202	6.10827	0.0134551	0.183616	Tshz1	ENSRNOG00000016246
6610	ENSRNOT00000035240	-0.765985	3.84275	6.10464	0.0134827	0.183616	S100a10	ENSRNOG00000023226
7740	ENSRNOT00000048933	0.549736	4.48	6.10651	0.0134685	0.183616	Tasor2	ENSRNOG00000018011
10851	ENSRNOT00000082599	0.764598	3.79122	6.1097	0.0134442	0.183616	Arap2	ENSRNOG00000056826
16336	ENSRNOT00000107930	0.883507	3.19869	6.10334	0.0134926	0.183625	Hnrnpk	ENSRNOG00000019113
17365	ENSRNOT00000111586	-0.752077	3.14761	6.10156	0.0135062	0.183683	Kat5	ENSRNOG00000061012
10868	ENSRNOT00000082705	-0.945453	7.95832	6.09857	0.0135292	0.183742	Rn7sl1	ENSRNOG00000065968
14196	ENSRNOT00000100109	0.749378	3.11399	6.09953	0.0135218	0.183742	Epha5	ENSRNOG00000002024
18808	ENSRNOT00000116887	-1.02927	2.58247	6.09591	0.0135495	0.183892	Ccdc30	ENSRNOG00000008560
15969	ENSRNOT00000106498	-0.828745	3.06316	6.09323	0.0135701	0.184044	U2af1l4	ENSRNOG00000024497
7506	ENSRNOT00000045773	0.921871	4.88254	6.09194	0.01358	0.184052	Dpp6	ENSRNOG00000030547
1973	ENSRNOT00000010433	0.515031	5.11977	6.08952	0.0135986	0.18412	Plod1	ENSRNOG00000007763
16311	ENSRNOT00000107827	1.00771	0.993764	6.08887	0.0136036	0.18412	Gda	ENSRNOG00000018282
19591	ENSRNOT00000119799	1.12051	1.71974	6.07629	0.0137008	0.185308	Ecpas	ENSRNOG00000025076
6487	ENSRNOT00000033844	0.824733	2.11851	6.07443	0.0137152	0.185376	Rbbp4-ps2	ENSRNOG00000021292
10969	ENSRNOT00000083468	0.744001	3.10867	6.07293	0.0137269	0.185407	Acta2	ENSRNOG00000058039
5137	ENSRNOT00000025386	-0.452341	5.61109	6.07121	0.0137403	0.185461	Dnlz	ENSRNOG00000018791
13101	ENSRNOT00000096168	0.481691	5.04972	6.06746	0.0137695	0.185728	Cltc	ENSRNOG00000004291
1988	ENSRNOT00000010521	0.429308	6.84061	6.05932	0.0138331	0.186332	Reln	ENSRNOG00000021441
15348	ENSRNOT00000104271	-0.832679	1.83085	6.05996	0.0138281	0.186332	Uchl3	ENSRNOG00000009530
2482	ENSRNOT00000012996	0.645446	4.27667	6.05797	0.0138437	0.186347	Dpysl2	ENSRNOG00000009625
18984	ENSRNOT00000117570	0.998725	1.2887	6.05621	0.0138575	0.186406	Btrc	ENSRNOG00000016280
11644	ENSRNOT00000087984	0.850873	2.3036	6.05487	0.013868	0.18642	Eif1a	ENSRNOG00000031421
6943	ENSRNOT00000038649	0.419011	6.44014	6.05123	0.0138966	0.186678	Hadha	ENSRNOG00000024629
11225	ENSRNOT00000085042	-0.42639	5.50558	6.04293	0.0139621	0.18743	Sh3glb2	ENSRNOG00000017295
3886	ENSRNOT00000019571	0.684661	4.18534	6.03688	0.01401	0.187946	Retsat	ENSRNOG00000014090
10173	ENSRNOT00000078101	-0.656761	3.97369	6.03414	0.0140318	0.188109	Ift52	ENSRNOG00000007692
14563	ENSRNOT00000101419	-0.960901	1.4329	6.02748	0.0140849	0.188693	Ifi35	ENSRNOG00000020678
17067	ENSRNOT00000110570	-0.587149	4.18527	6.02303	0.0141204	0.189041	Pycr3	ENSRNOG00000021638
19452	ENSRNOT00000119271	-0.477804	5.03104	6.01791	0.0141614	0.189461	NA	ENSRNOG00000070938
3664	ENSRNOT00000018497	-0.880024	1.88101	6.01529	0.0141824	0.189486	Akip1	ENSRNOG00000013744
17013	ENSRNOT00000110381	-0.933691	3.48311	6.01617	0.0141754	0.189486	Ppm1j	ENSRNOG00000012481
5792	ENSRNOT00000027980	-0.391159	7.02839	6.01154	0.0142126	0.189761	Ndufa13	ENSRNOG00000020602
10794	ENSRNOT00000082209	-0.422119	5.4359	6.00958	0.0142284	0.189843	Lrrc45	ENSRNOG00000045926
6367	ENSRNOT00000032316	-0.570318	4.22762	6.00743	0.0142458	0.189947	Eif4ebp3	ENSRNOG00000030247
19099	ENSRNOT00000117981	0.539768	4.60233	6.00329	0.0142792	0.190264	Mff	ENSRNOG00000015428
8965	ENSRNOT00000066670	0.583281	4.60271	5.99978	0.0143077	0.190515	Cxcl12	ENSRNOG00000013589
786	ENSRNOT00000004127	-0.424075	5.76762	5.99179	0.0143726	0.190792	Cenpv	ENSRNOG00000003086
3599	ENSRNOT00000018167	0.993366	3.15906	5.99249	0.0143669	0.190792	Pex14	ENSRNOG00000013498
9605	ENSRNOT00000073860	-0.798116	3.89472	5.99514	0.0143454	0.190792	Larp7	ENSRNOG00000048989
14503	ENSRNOT00000101200	-0.613746	3.88351	5.9901	0.0143864	0.190792	Emd	ENSRNOG00000058882
17937	ENSRNOT00000113772	0.599545	5.40983	5.9906	0.0143823	0.190792	Polb	ENSRNOG00000019150
18916	ENSRNOT00000117298	-0.563866	6.26235	5.99369	0.0143572	0.190792	Begain	ENSRNOG00000004650
4183	ENSRNOT00000020988	0.980398	0.989029	5.97895	0.0144777	0.191066	Ptprk	ENSRNOG00000047605
6467	ENSRNOT00000033661	-0.529002	4.65338	5.98203	0.0144523	0.191066	Zfp14	ENSRNOG00000030932
8873	ENSRNOT00000065912	0.68681	5.39055	5.9856	0.0144231	0.191066	Ankrd6	ENSRNOG00000007110
9137	ENSRNOT00000067970	-0.584862	4.35082	5.97987	0.0144701	0.191066	Ergic2	ENSRNOG00000001852
12699	ENSRNOT00000094653	-0.496618	5.34499	5.9835	0.0144403	0.191066	Dlx6	ENSRNOG00000063630
14277	ENSRNOT00000100351	0.780785	3.17497	5.97811	0.0144845	0.191066	NA	ENSRNOG00000065096
16263	ENSRNOT00000107629	0.79755	2.28295	5.98205	0.0144522	0.191066	NA	ENSRNOG00000063076
16618	ENSRNOT00000108902	0.711552	5.05719	5.98035	0.0144661	0.191066	Chi3l1	ENSRNOG00000053272
7027	ENSRNOT00000039572	0.866195	1.85138	5.97252	0.0145305	0.191417	Nras	ENSRNOG00000023079
15384	ENSRNOT00000104460	-0.610311	4.72178	5.97354	0.0145221	0.191417	Ncor2	ENSRNOG00000001004
5946	ENSRNOT00000028624	-0.448002	5.92082	5.97008	0.0145506	0.191554	Fxyd1	ENSRNOG00000021079
16505	ENSRNOT00000108491	-1.02422	0.380242	5.96667	0.0145788	0.191669	Galnt15	ENSRNOG00000019718
17090	ENSRNOT00000110650	1.10064	2.19569	5.96739	0.0145728	0.191669	Spg21	ENSRNOG00000015019
7762	ENSRNOT00000049297	-0.310263	8.64298	5.95903	0.0146421	0.191991	Grin1	ENSRNOG00000011726
12162	ENSRNOT00000091346	-0.965997	3.41468	5.95994	0.0146345	0.191991	Trrap	ENSRNOG00000025244
15859	ENSRNOT00000106102	0.918916	1.11053	5.96189	0.0146184	0.191991	Atl3	ENSRNOG00000021203
16002	ENSRNOT00000106610	-0.941249	0.182978	5.96011	0.0146331	0.191991	Tmem63c	ENSRNOG00000011334
5787	ENSRNOT00000027967	-0.487224	5.03104	5.95045	0.0147136	0.192162	Pstk	ENSRNOG00000020605
6706	ENSRNOT00000036172	0.423485	5.68032	5.95355	0.0146877	0.192162	Hnrnpm	ENSRNOG00000007921
10973	ENSRNOT00000083489	-0.523178	4.90204	5.95072	0.0147113	0.192162	Ppt2	ENSRNOG00000000435
18221	ENSRNOT00000114758	-0.672809	3.42127	5.95459	0.014679	0.192162	Ybx2	ENSRNOG00000017117
19121	ENSRNOT00000118068	-0.768505	3.60771	5.95383	0.0146853	0.192162	Ciz1	ENSRNOG00000013442
19337	ENSRNOT00000118847	-0.696596	4.52133	5.95191	0.0147013	0.192162	Ap2s1	ENSRNOG00000015865
17958	ENSRNOT00000113840	-0.533821	4.71232	5.94534	0.0147563	0.192592	Polr3k	ENSRNOG00000017843
1179	ENSRNOT00000005996	-0.672204	4.62328	5.94411	0.0147665	0.192599	Pes1	ENSRNOG00000004515
2253	ENSRNOT00000011827	-0.50957	5.03178	5.94098	0.0147928	0.192814	Tada3	ENSRNOG00000008597
12641	ENSRNOT00000094446	-1.02663	1.2681	5.9381	0.014817	0.193002	Baiap2	ENSRNOG00000004049
17551	ENSRNOT00000112274	0.954382	0.944313	5.93512	0.014842	0.193201	Pigq	ENSRNOG00000020140
10828	ENSRNOT00000082445	0.915571	2.82578	5.93011	0.0148843	0.193623	Gabrg2	ENSRNOG00000003241
15905	ENSRNOT00000106270	1.06896	1.24414	5.92792	0.0149029	0.193737	Lrrn2	ENSRNOG00000009691
19456	ENSRNOT00000119288	-0.581225	4.83924	5.92354	0.0149399	0.194091	Ppp2r2d	ENSRNOG00000016940
11687	ENSRNOT00000088280	0.533312	4.50139	5.9215	0.0149572	0.194188	Zkscan8	ENSRNOG00000053635
1608	ENSRNOT00000008478	1.09868	1.14579	5.92027	0.0149677	0.194196	Sulf2	ENSRNOG00000006052
2338	ENSRNOT00000012233	-0.959857	1.91359	5.91616	0.0150026	0.194521	Dad1	ENSRNOG00000009090
10228	ENSRNOT00000078498	0.948734	1.31283	5.90659	0.0150844	0.195197	Zbtb1	ENSRNOG00000058593
10663	ENSRNOT00000081278	0.557082	4.38684	5.90764	0.0150754	0.195197	Selenoi	ENSRNOG00000059295
17542	ENSRNOT00000112244	-0.509176	5.03213	5.90674	0.015083	0.195197	Aimp1	ENSRNOG00000011384
3645	ENSRNOT00000018425	0.447616	5.3095	5.90535	0.015095	0.195207	Avl9	ENSRNOG00000013314
3205	ENSRNOT00000016328	0.823316	2.99296	5.90123	0.0151303	0.195535	Dusp4	ENSRNOG00000011921
9159	ENSRNOT00000068110	-0.447141	5.37853	5.89731	0.015164	0.195843	Snapc4	ENSRNOG00000018845
14043	ENSRNOT00000099593	1.2199	1.55387	5.89555	0.0151792	0.195911	Lsm6	ENSRNOG00000066480
11317	ENSRNOT00000085735	0.42848	6.89268	5.88807	0.0152438	0.196222	Ywhah	ENSRNOG00000055471
11523	ENSRNOT00000087094	0.396741	5.75915	5.89001	0.015227	0.196222	Rac1	ENSRNOG00000001068
13222	ENSRNOT00000096630	0.895312	2.27043	5.8913	0.0152158	0.196222	Mmp14	ENSRNOG00000010947
17920	ENSRNOT00000113725	-0.551513	4.65136	5.88855	0.0152397	0.196222	Sltm	ENSRNOG00000054446
19154	ENSRNOT00000118190	0.628027	4.4877	5.88701	0.015253	0.196222	Lypla1	ENSRNOG00000008320
11903	ENSRNOT00000089713	-0.700263	4.15265	5.88487	0.0152715	0.196229	Tfpt	ENSRNOG00000056098
17793	ENSRNOT00000113254	-0.466848	5.23179	5.88465	0.0152734	0.196229	Ly6g6e	ENSRNOG00000027157
16770	ENSRNOT00000109436	0.674739	3.43766	5.87787	0.0153324	0.196858	Scaf11	ENSRNOG00000005263
17238	ENSRNOT00000111120	0.722586	3.74019	5.87654	0.0153439	0.196879	Picalm	ENSRNOG00000018322
3131	ENSRNOT00000016028	0.972928	0.955555	5.87137	0.0153891	0.19733	Gin1	ENSRNOG00000011962
18272	ENSRNOT00000114946	0.861731	1.53277	5.86969	0.0154037	0.19739	Rae1	ENSRNOG00000021295
5865	ENSRNOT00000028222	-0.570862	4.50612	5.86361	0.0154571	0.197689	Polr2i	ENSRNOG00000020799
14873	ENSRNOT00000102622	0.708785	3.66492	5.86451	0.0154491	0.197689	Igsf8	ENSRNOG00000007604
14947	ENSRNOT00000102873	-0.477	7.38608	5.86529	0.0154423	0.197689	Fscn1	ENSRNOG00000056585
169	ENSRNOT00000000909	0.454268	5.25556	5.85282	0.0155521	0.198228	Cggbp1	ENSRNOG00000000718
3498	ENSRNOT00000017688	0.705804	4.21806	5.8546	0.0155364	0.198228	Sash1	ENSRNOG00000013160
6096	ENSRNOT00000029600	0.348729	7.79795	5.85673	0.0155176	0.198228	Pbx3	ENSRNOG00000022162
6121	ENSRNOT00000029819	-0.78386	2.91841	5.85548	0.0155286	0.198228	Irak2	ENSRNOG00000021817
10174	ENSRNOT00000078122	-0.803149	2.79141	5.85199	0.0155595	0.198228	Rab11b	ENSRNOG00000007648
10675	ENSRNOT00000081370	0.475699	5.6262	5.85283	0.015552	0.198228	Tm9sf4	ENSRNOG00000009406
15432	ENSRNOT00000104624	-0.381415	6.68411	5.84815	0.0155934	0.198532	Prdx5	ENSRNOG00000021125
5644	ENSRNOT00000027392	-0.386877	6.10093	5.84562	0.0156159	0.198562	Prrt2	ENSRNOG00000029366
11842	ENSRNOT00000089305	0.462554	5.8529	5.8462	0.0156107	0.198562	Actn4	ENSRNOG00000020433
14508	ENSRNOT00000101228	-0.650253	6.31249	5.83853	0.0156789	0.199235	Akr1a1	ENSRNOG00000016727
10081	ENSRNOT00000077453	-0.632785	4.43722	5.83715	0.0156912	0.199263	Rbm10	ENSRNOG00000008472
5991	ENSRNOT00000028759	0.86212	2.41725	5.83468	0.0157133	0.199415	Naa40	ENSRNOG00000021179
5426	ENSRNOT00000026551	-0.567747	4.23722	5.83194	0.0157377	0.199505	Lsm7	ENSRNOG00000019552
18312	ENSRNOT00000115095	-0.466108	5.69696	5.83163	0.0157405	0.199505	Pdzd4	ENSRNOG00000056174
2866	ENSRNOT00000014795	0.565941	4.10848	5.83037	0.0157518	0.19952	Lhfpl2	ENSRNOG00000011032
1835	ENSRNOT00000009705	0.313482	8.31687	5.81797	0.0158633	0.200617	Slc6a1	ENSRNOG00000006527
9154	ENSRNOT00000068085	-0.532323	5.02036	5.81904	0.0158536	0.200617	Cystm1	ENSRNOG00000018775
14809	ENSRNOT00000102396	0.901071	3.64295	5.81734	0.0158689	0.200617	Fryl	ENSRNOG00000002248
18594	ENSRNOT00000116064	-0.522919	4.38156	5.81556	0.015885	0.200692	Limd2	ENSRNOG00000025448
17059	ENSRNOT00000110525	-0.341253	7.30202	5.80935	0.0159412	0.201273	Itih3	ENSRNOG00000017689
11127	ENSRNOT00000084509	0.616587	3.94942	5.80513	0.0159795	0.201479	Cnot6	ENSRNOG00000054891
14080	ENSRNOT00000099697	0.44814	5.20474	5.80418	0.0159881	0.201479	NA	ENSRNOG00000068332
16001	ENSRNOT00000106601	-0.613224	4.12055	5.80603	0.0159713	0.201479	Hsf1	ENSRNOG00000021732
7264	ENSRNOT00000042576	0.858635	0.76959	5.80205	0.0160075	0.201481	Mme	ENSRNOG00000009514
8200	ENSRNOT00000056649	0.830307	1.89492	5.80192	0.0160087	0.201481	Tmem196	ENSRNOG00000037435
7865	ENSRNOT00000050533	0.82533	2.33123	5.79919	0.0160336	0.201666	Zfp654	ENSRNOG00000029956
11633	ENSRNOT00000087907	-0.392417	7.31703	5.79465	0.016075	0.202058	Epb41l1	ENSRNOG00000057817
10058	ENSRNOT00000077314	-0.443929	5.38385	5.79266	0.0160932	0.202159	Oplah	ENSRNOG00000011781
15988	ENSRNOT00000106575	0.510989	4.71405	5.78653	0.0161494	0.202735	Odf2	ENSRNOG00000014584
2421	ENSRNOT00000012625	0.796902	2.46462	5.78212	0.01619	0.203116	Lmo2	ENSRNOG00000009401
13501	ENSRNOT00000097588	-0.852035	2.13074	5.78041	0.0162058	0.203185	Wdr55	ENSRNOG00000017251
5716	ENSRNOT00000027675	-0.385619	6.01813	5.77639	0.0162429	0.203263	Med25	ENSRNOG00000020363
15917	ENSRNOT00000106325	-0.803917	2.13635	5.7772	0.0162354	0.203263	NA	ENSRNOG00000066115
18334	ENSRNOT00000115166	0.850125	1.31703	5.77646	0.0162422	0.203263	Cnnm3	ENSRNOG00000016032
12448	ENSRNOT00000093644	1.16788	1.92141	5.77262	0.0162778	0.20357	Abhd18	ENSRNOG00000013692
1213	ENSRNOT00000006190	0.386757	7.40638	5.76427	0.0163553	0.20441	Ppp1cb	ENSRNOG00000004612
5469	ENSRNOT00000026713	-0.353611	7.73024	5.76229	0.0163737	0.204511	Ssbp4	ENSRNOG00000019698
12962	ENSRNOT00000095718	0.80396	3.87811	5.75709	0.0164222	0.204987	Vps50	ENSRNOG00000009894
8801	ENSRNOT00000065300	-1.09196	4.19614	5.75525	0.0164395	0.205073	Miga2	ENSRNOG00000017513
8581	ENSRNOT00000061921	-0.597763	4.54275	5.75405	0.0164507	0.205083	Mta3	ENSRNOG00000004685
18643	ENSRNOT00000116278	-0.660398	4.46856	5.75058	0.0164832	0.205358	Creld1	ENSRNOG00000009414
3343	ENSRNOT00000017005	0.515865	6.05441	5.74901	0.0164979	0.205412	Nfat5	ENSRNOG00000011879
5159	ENSRNOT00000025495	-0.510299	5.16813	5.74468	0.0165387	0.205661	Cystm1	ENSRNOG00000018775
9069	ENSRNOT00000067489	0.766716	2.53345	5.74557	0.0165303	0.205661	Abcc9	ENSRNOG00000036960
16308	ENSRNOT00000107810	0.848786	2.48509	5.74127	0.0165708	0.20593	Ctif	ENSRNOG00000018342
2527	ENSRNOT00000013228	0.415798	6.24366	5.73254	0.0166533	0.206826	Tmod1	ENSRNOG00000009761
5560	ENSRNOT00000027063	-0.404658	7.21973	5.72563	0.016719	0.206896	Kcnc3	ENSRNOG00000019959
5827	ENSRNOT00000028091	-0.368484	6.82079	5.72603	0.0167153	0.206896	Dpf1	ENSRNOG00000020687
12515	ENSRNOT00000093971	-0.821748	2.74704	5.72547	0.0167206	0.206896	Tpm2	ENSRNOG00000016731
14513	ENSRNOT00000101243	0.974685	0.995524	5.73068	0.016671	0.206896	Cabp1	ENSRNOG00000001173
14885	ENSRNOT00000102666	-0.501716	4.76396	5.72534	0.0167218	0.206896	Slc35b1	ENSRNOG00000004510
18212	ENSRNOT00000114709	-1.02345	2.65303	5.72806	0.0166959	0.206896	Slc26a6	ENSRNOG00000020450
16290	ENSRNOT00000107734	-1.04108	2.85293	5.72134	0.01676	0.207238	Ablim3	ENSRNOG00000019365
4121	ENSRNOT00000020670	-0.351869	7.71437	5.71739	0.0167977	0.207316	Atp5f1d	ENSRNOG00000014625
15994	ENSRNOT00000106585	1.30519	2.22683	5.71629	0.0168083	0.207316	Nktr	ENSRNOG00000049128
16745	ENSRNOT00000109357	-0.871092	3.44906	5.71681	0.0168032	0.207316	Lima1	ENSRNOG00000059801
18182	ENSRNOT00000114625	-0.373156	6.535	5.71885	0.0167837	0.207316	Arhgef25	ENSRNOG00000005034
18486	ENSRNOT00000115724	-0.522786	4.99687	5.71329	0.0168369	0.20754	Sap25	ENSRNOG00000066351
19136	ENSRNOT00000118109	-0.502758	4.67867	5.70983	0.0168702	0.20782	Hdac10	ENSRNOG00000031915
11813	ENSRNOT00000089102	-0.895219	2.13444	5.70228	0.0169429	0.208585	Hbb	ENSRNOG00000047098
11420	ENSRNOT00000086377	0.478242	4.88237	5.70038	0.0169612	0.208681	Cald1	ENSRNOG00000010233
9278	ENSRNOT00000071076	1.10026	0.604341	5.69901	0.0169745	0.208714	Parl	ENSRNOG00000023271
15811	ENSRNOT00000105918	-0.913855	2.52069	5.69739	0.0169901	0.208777	Raf1	ENSRNOG00000010153
11023	ENSRNOT00000083839	-0.392859	6.68125	5.69066	0.0170555	0.209449	Uqcr10	ENSRNOG00000059061
18555	ENSRNOT00000115928	1.12897	2.08691	5.68721	0.017089	0.2096	LOC120095871	ENSRNOG00000068541
19135	ENSRNOT00000118108	-0.432118	6.29864	5.68763	0.0170849	0.2096	Uqcrh	ENSRNOG00000012550
15792	ENSRNOT00000105855	-0.531481	4.82044	5.68214	0.0171384	0.210076	Cfap410	ENSRNOG00000001215
16890	ENSRNOT00000109912	-0.842715	1.92664	5.67913	0.0171679	0.210307	Mrps36	ENSRNOG00000061213
5733	ENSRNOT00000027752	0.809382	2.03396	5.67126	0.017245	0.211121	Nucb2	ENSRNOG00000020456
6005	ENSRNOT00000028828	-0.435081	5.71093	5.66504	0.0173063	0.211739	Mrps26	ENSRNOG00000021224
17080	ENSRNOT00000110622	0.818372	3.37168	5.66116	0.0173447	0.212078	H3f3a-ps9	ENSRNOG00000065853
4233	ENSRNOT00000021236	0.895732	0.321789	5.65992	0.0173569	0.212096	Adora3	ENSRNOG00000015788
11591	ENSRNOT00000087579	-0.435277	5.66061	5.65485	0.0174071	0.212465	Bcas1	ENSRNOG00000012906
15848	ENSRNOT00000106057	0.933956	1.92527	5.6547	0.0174087	0.212465	Trim5	ENSRNOG00000017191
5922	ENSRNOT00000028496	-0.5619	4.35762	5.64815	0.0174738	0.212734	Slc25a39	ENSRNOG00000020994
9359	ENSRNOT00000071745	1.34779	3.85292	5.65065	0.0174489	0.212734	Slc2a3	ENSRNOG00000008376
12527	ENSRNOT00000094013	0.446299	5.48507	5.64858	0.0174695	0.212734	Npdc1	ENSRNOG00000013102
16256	ENSRNOT00000107608	-0.842873	1.18315	5.64861	0.0174692	0.212734	Sh3gl1	ENSRNOG00000049683
8342	ENSRNOT00000058387	1.20901	2.58617	5.64611	0.0174942	0.212851	Focad	ENSRNOG00000024402
948	ENSRNOT00000004942	0.38521	5.82377	5.6348	0.0176073	0.21395	Tmed7	ENSRNOG00000003691
6362	ENSRNOT00000032252	-0.341803	7.38758	5.63384	0.017617	0.21395	Carmil3	ENSRNOG00000025518
7949	ENSRNOT00000051665	0.740504	2.8891	5.63432	0.0176122	0.21395	Zfp780b-ps1	ENSRNOG00000018936
8878	ENSRNOT00000065962	-0.457636	5.68421	5.63081	0.0176474	0.214056	Tomm7	ENSRNOG00000043114
11247	ENSRNOT00000085260	-0.451692	5.40684	5.63089	0.0176466	0.214056	Kansl3	ENSRNOG00000015417
1660	ENSRNOT00000008854	-0.361714	7.3011	5.62411	0.017715	0.214495	Mbd6	ENSRNOG00000006209
14447	ENSRNOT00000100997	-0.53647	4.91197	5.62464	0.0177097	0.214495	Ccdc92	ENSRNOG00000021691
16173	ENSRNOT00000107249	-1.03847	3.30463	5.624	0.0177162	0.214495	Mtus2	ENSRNOG00000032410
5678	ENSRNOT00000027512	-0.389132	6.03782	5.62034	0.0177532	0.214812	Pdcd11	ENSRNOG00000020304
13783	ENSRNOT00000098630	-0.362968	6.37735	5.61389	0.0178187	0.215472	Rtel1	ENSRNOG00000027513
9546	ENSRNOT00000073287	-0.580052	3.93279	5.61198	0.0178381	0.215574	H2aj	ENSRNOG00000045819
10650	ENSRNOT00000081195	0.560581	4.83965	5.60768	0.0178819	0.215972	Smarcd1	ENSRNOG00000061572
15121	ENSRNOT00000103528	-0.441463	5.66713	5.60265	0.0179333	0.21646	NA	ENSRNOG00000064727
7838	ENSRNOT00000050204	-0.805768	3.54627	5.60003	0.0179602	0.216652	Rpl6-ps1	ENSRNOG00000031889
10031	ENSRNOT00000077142	-0.472801	5.89362	5.59229	0.0180396	0.217478	Hcfc1	ENSRNOG00000051948
9638	ENSRNOT00000074122	-0.469846	5.01121	5.58994	0.0180639	0.217637	Pip5kl1	ENSRNOG00000048676
18881	ENSRNOT00000117171	0.547654	4.99968	5.58844	0.0180794	0.217691	Dync1i1	ENSRNOG00000009700
13236	ENSRNOT00000096662	0.914871	3.47168	5.58545	0.0181103	0.217931	Fmnl2	ENSRNOG00000055567
11782	ENSRNOT00000088895	-0.371641	6.8241	5.58349	0.0181306	0.217941	Atn1	ENSRNOG00000060594
15044	ENSRNOT00000103260	-0.887957	2.90716	5.58323	0.0181333	0.217941	Lgals1	ENSRNOG00000009884
7178	ENSRNOT00000041493	-0.406133	6.907	5.58191	0.0181469	0.217972	Kif1c	ENSRNOG00000031364
10945	ENSRNOT00000083300	0.562797	4.72364	5.57851	0.0181822	0.218264	Dusp14	ENSRNOG00000030091
10641	ENSRNOT00000081141	-0.755297	4.08946	5.57405	0.0182286	0.218687	Dnajc27	ENSRNOG00000003988
7184	ENSRNOT00000041613	-0.357193	6.89116	5.56934	0.0182776	0.21869	Rxrb	ENSRNOG00000000464
8197	ENSRNOT00000056600	-0.438674	5.94852	5.57242	0.0182455	0.21869	Cops9	ENSRNOG00000037402
14775	ENSRNOT00000102280	-0.969509	1.17411	5.57153	0.0182548	0.21869	NA	ENSRNOG00000071112
15278	ENSRNOT00000104024	0.351371	7.3583	5.57054	0.0182652	0.21869	Gabra1	ENSRNOG00000003512
19056	ENSRNOT00000117834	0.937348	0.132354	5.56872	0.0182842	0.21869	Gtf3c3	ENSRNOG00000002091
19720	ENSRNOT00000120216	-0.473039	5.85811	5.56752	0.0182966	0.218707	Pcbp2	ENSRNOG00000036852
17944	ENSRNOT00000113799	-0.655383	3.45886	5.56317	0.0183422	0.219119	RGD1308134	ENSRNOG00000018829
2400	ENSRNOT00000012506	-0.389578	5.68564	5.55987	0.0183767	0.219266	E4f1	ENSRNOG00000009224
2786	ENSRNOT00000014399	-0.388684	6.11642	5.56055	0.0183696	0.219266	Zbtb17	ENSRNOG00000010436
5371	ENSRNOT00000026327	0.344055	6.96517	5.55837	0.0183926	0.219322	Dag1	ENSRNOG00000019400
6770	ENSRNOT00000036904	0.366045	6.27739	5.55707	0.0184062	0.219353	Ankrd46	ENSRNOG00000025504
14198	ENSRNOT00000100114	-0.672635	5.38175	5.55275	0.0184517	0.219762	Por	ENSRNOG00000001442
516	ENSRNOT00000002542	-0.833937	1.99801	5.53623	0.0186267	0.219794	Ydjc	ENSRNOG00000001861
1340	ENSRNOT00000006835	-0.740683	3.00906	5.53713	0.0186171	0.219794	Crip1	ENSRNOG00000027990
3111	ENSRNOT00000015935	-0.44973	5.54718	5.53902	0.0185969	0.219794	Klc1	ENSRNOG00000011572
3462	ENSRNOT00000017486	-0.307522	8.72011	5.54902	0.0184911	0.219794	Sparc	ENSRNOG00000012840
3481	ENSRNOT00000017613	-0.86416	4.24877	5.53568	0.0186325	0.219794	Ankrd12	ENSRNOG00000012733
5626	ENSRNOT00000027301	-0.675133	3.68976	5.53617	0.0186274	0.219794	Il18bp	ENSRNOG00000020150
5748	ENSRNOT00000027786	-0.354448	6.6548	5.54152	0.0185705	0.219794	Irf3	ENSRNOG00000043388
6207	ENSRNOT00000030706	0.807223	2.08153	5.54714	0.0185109	0.219794	Clec14a	ENSRNOG00000022697
7708	ENSRNOT00000048495	-0.766226	3.34823	5.54016	0.0185848	0.219794	AABR07049329.1	ENSRNOG00000030107
8208	ENSRNOT00000056790	0.69786	4.73873	5.54303	0.0185544	0.219794	Ulk1	ENSRNOG00000037505
10873	ENSRNOT00000082725	0.628022	4.1025	5.54457	0.0185381	0.219794	Kdm5c	ENSRNOG00000057706
14598	ENSRNOT00000101574	0.47945	5.1184	5.54204	0.018565	0.219794	Smoc1	ENSRNOG00000005998
14677	ENSRNOT00000101899	-0.882522	1.30358	5.53576	0.0186317	0.219794	Nedd4l	ENSRNOG00000017610
16284	ENSRNOT00000107713	-0.618821	4.38377	5.53569	0.0186325	0.219794	Prr13	ENSRNOG00000042094
18010	ENSRNOT00000114026	-0.384605	6.19358	5.53874	0.0186	0.219794	Sec16a	ENSRNOG00000019122
18899	ENSRNOT00000117246	-1.10329	2.01131	5.53976	0.0185892	0.219794	Mast4	ENSRNOG00000027002
4676	ENSRNOT00000023366	0.764948	2.92792	5.53277	0.0186636	0.220029	Rnpc3	ENSRNOG00000017310
10790	ENSRNOT00000082184	0.37651	8.77861	5.53169	0.018675	0.220033	Rsrp1	ENSRNOG00000017309
8789	ENSRNOT00000065195	0.406472	5.78769	5.52265	0.0187718	0.220728	Sucla2	ENSRNOG00000017481
10640	ENSRNOT00000081134	-0.521756	4.59072	5.52375	0.01876	0.220728	Pxn	ENSRNOG00000001149
11925	ENSRNOT00000089853	-0.438863	6.8372	5.52096	0.0187899	0.220728	Mink1	ENSRNOG00000033508
15638	ENSRNOT00000105297	0.860681	0.854241	5.52142	0.018785	0.220728	Mlip	ENSRNOG00000005934
16959	ENSRNOT00000110173	-0.411074	6.50084	5.52129	0.0187864	0.220728	Sdhc	ENSRNOG00000003163
11691	ENSRNOT00000088288	-0.331306	7.37592	5.51812	0.0188205	0.220886	Sptbn2	ENSRNOG00000058842
18852	ENSRNOT00000117050	0.696863	3.55815	5.51763	0.0188257	0.220886	Meaf6	ENSRNOG00000009309
8479	ENSRNOT00000060645	-0.68673	3.05415	5.51624	0.0188407	0.220931	Gng5-ps4	ENSRNOG00000039562
10222	ENSRNOT00000078445	0.530237	4.52688	5.51437	0.0188609	0.220975	Med13l	ENSRNOG00000001120
17184	ENSRNOT00000110943	-0.539515	4.63327	5.51382	0.0188668	0.220975	Ptprv	ENSRNOG00000005277
10033	ENSRNOT00000077146	-0.483593	5.15113	5.51209	0.0188855	0.221012	Sbno2	ENSRNOG00000013987
14593	ENSRNOT00000101560	-0.501024	4.89651	5.51145	0.0188924	0.221012	NA	ENSRNOG00000068741
15367	ENSRNOT00000104360	-0.749703	4.64256	5.50937	0.0189149	0.221144	Zfp958	ENSRNOG00000065430
4558	ENSRNOT00000022796	0.803438	4.41943	5.50704	0.0189401	0.221307	Bace1	ENSRNOG00000016847
5524	ENSRNOT00000026941	-0.369624	6.1773	5.49816	0.0190365	0.22204	Speg	ENSRNOG00000019850
10812	ENSRNOT00000082341	-1.13942	2.54608	5.4986	0.0190317	0.22204	Trip10	ENSRNOG00000055524
17118	ENSRNOT00000110749	0.447244	5.92956	5.49839	0.019034	0.22204	Kctd12	ENSRNOG00000066973
1905	ENSRNOT00000010117	-0.377146	6.40949	5.49397	0.0190822	0.222179	Ndufa12	ENSRNOG00000007407
15344	ENSRNOT00000104253	0.929614	0.892845	5.49531	0.0190675	0.222179	Arf4	ENSRNOG00000012623
16521	ENSRNOT00000108568	-0.440631	5.04039	5.49423	0.0190794	0.222179	Vamp3	ENSRNOG00000030055
92	ENSRNOT00000000495	-0.328321	7.93642	5.49127	0.0191117	0.222391	Prrt1	ENSRNOG00000000433
1143	ENSRNOT00000005844	0.924247	0.279995	5.48827	0.0191445	0.222642	Pah	ENSRNOG00000004302
14017	ENSRNOT00000099511	0.409877	5.50566	5.48716	0.0191567	0.222653	Dzip3	ENSRNOG00000001956
12864	ENSRNOT00000095348	0.853688	3.08521	5.47852	0.0192516	0.223492	Gtpbp4	ENSRNOG00000016217
15129	ENSRNOT00000103558	-0.823365	2.21468	5.47914	0.0192447	0.223492	Jak2	ENSRNOG00000059968
686	ENSRNOT00000003558	0.486497	5.61241	5.47267	0.0193161	0.224072	Ivns1abp	ENSRNOG00000002618
3504	ENSRNOT00000017712	-0.447305	5.27387	5.47095	0.0193351	0.224072	Nudt2	ENSRNOG00000013110
11034	ENSRNOT00000083926	-0.441514	5.39711	5.47091	0.0193356	0.224072	Rpap3	ENSRNOG00000053405
8482	ENSRNOT00000060690	-0.359312	8.44907	5.46386	0.0194137	0.224714	Cbarp	ENSRNOG00000024349
15549	ENSRNOT00000105005	0.944142	1.78216	5.46453	0.0194063	0.224714	Papola	ENSRNOG00000004827
2717	ENSRNOT00000014051	0.529727	4.2517	5.4589	0.0194689	0.225156	Cyp39a1	ENSRNOG00000010519
4167	ENSRNOT00000020886	1.06813	2.29906	5.45736	0.0194861	0.225156	Ppp6r3	ENSRNOG00000015540
15812	ENSRNOT00000105921	-0.635657	4.07997	5.45772	0.0194821	0.225156	NA	ENSRNOG00000064629
1582	ENSRNOT00000008281	0.865951	2.62755	5.44869	0.019583	0.226143	Cpne3	ENSRNOG00000006298
4916	ENSRNOT00000024413	-0.624552	3.55963	5.44354	0.0196409	0.226679	Mvb12a	ENSRNOG00000017949
551	ENSRNOT00000002867	0.892676	1.61191	5.44006	0.01968	0.226901	Tgfbr3	ENSRNOG00000002093
14559	ENSRNOT00000101407	0.817742	2.1737	5.43979	0.0196831	0.226901	Pmpcb	ENSRNOG00000012693
1714	ENSRNOT00000009094	0.44274	5.11166	5.43652	0.0197199	0.227061	Ndnf	ENSRNOG00000006857
2467	ENSRNOT00000012883	0.448884	5.05369	5.4375	0.0197089	0.227061	Sqle	ENSRNOG00000009550
8959	ENSRNOT00000066623	-0.424559	5.46586	5.42029	0.019904	0.229047	Nphp4	ENSRNOG00000011967
7093	ENSRNOT00000040464	-0.345992	7.60263	5.4177	0.0199336	0.229047	Fcho1	ENSRNOG00000033912
9787	ENSRNOT00000075400	-0.969439	0.402566	5.41878	0.0199212	0.229047	Gng12	ENSRNOG00000050231
15051	ENSRNOT00000103293	0.650443	3.74049	5.41724	0.0199389	0.229047	Zbtb6	ENSRNOG00000009340
10147	ENSRNOT00000077958	-0.602459	3.7429	5.41411	0.0199747	0.229325	Nlrx1	ENSRNOG00000052386
5781	ENSRNOT00000027949	-0.386813	6.39929	5.4088	0.0200355	0.229409	Shfl	ENSRNOG00000020580
7167	ENSRNOT00000041365	0.48872	5.41795	5.40836	0.0200405	0.229409	Fry	ENSRNOG00000000894
13283	ENSRNOT00000096824	0.883048	0.641155	5.41065	0.0200142	0.229409	Kif3a	ENSRNOG00000007515
13296	ENSRNOT00000096877	-0.459144	6.64507	5.40781	0.0200469	0.229409	Abhd8	ENSRNOG00000000054
16643	ENSRNOT00000108987	0.40122	5.77044	5.4103	0.0200183	0.229409	Gng4	ENSRNOG00000068923
18850	ENSRNOT00000117040	-0.471416	5.2289	5.40739	0.0200517	0.229409	Fbxo25	ENSRNOG00000042464
15479	ENSRNOT00000104777	0.899809	2.57026	5.40414	0.020089	0.229704	Eif4a2	ENSRNOG00000001815
14422	ENSRNOT00000100905	0.602552	4.37914	5.40017	0.0201348	0.230052	Mthfd1	ENSRNOG00000005602
15741	ENSRNOT00000105687	-1.05664	1.21008	5.39947	0.0201428	0.230052	Sh3gl1	ENSRNOG00000049683
1929	ENSRNOT00000010224	-0.527697	4.71498	5.39252	0.0202233	0.230571	Ptp4a3	ENSRNOG00000007628
10470	ENSRNOT00000079981	0.942132	0.939658	5.39262	0.0202221	0.230571	Asap1	ENSRNOG00000058733
19686	ENSRNOT00000120132	-0.327922	7.83232	5.39293	0.0202185	0.230571	Rbfox3	ENSRNOG00000003386
15821	ENSRNOT00000105955	-0.798866	0.882531	5.38903	0.0202637	0.230898	Snrpe	ENSRNOG00000067587
13809	ENSRNOT00000098717	-0.581301	5.20859	5.38451	0.0203163	0.231365	Timm44	ENSRNOG00000001058
9355	ENSRNOT00000071708	-0.288969	9.87708	5.3784	0.0203875	0.232042	Tmsb4x	ENSRNOG00000047931
6023	ENSRNOT00000028892	0.325419	8.28809	5.37308	0.0204498	0.232617	Chgb	ENSRNOG00000021269
2889	ENSRNOT00000014910	-0.3162	8.27228	5.36872	0.020501	0.232645	Dynll1	ENSRNOG00000011222
6134	ENSRNOT00000029994	-0.76248	1.09435	5.36976	0.0204888	0.232645	Trim72	ENSRNOG00000022099
13562	ENSRNOT00000097810	0.634059	3.60276	5.36785	0.0205112	0.232645	NA	ENSRNOG00000068783
17132	ENSRNOT00000110804	-0.626853	3.79678	5.37129	0.0204708	0.232645	Trappc13	ENSRNOG00000012124
19098	ENSRNOT00000117979	-0.531286	5.62509	5.36803	0.0205091	0.232645	Pkp4	ENSRNOG00000005504
10786	ENSRNOT00000082173	0.47073	4.73225	5.36086	0.0205936	0.233044	Ap1ar	ENSRNOG00000024492
11223	ENSRNOT00000085037	0.748095	2.74862	5.36219	0.0205779	0.233044	Gabra3	ENSRNOG00000056558
11871	ENSRNOT00000089488	-0.407823	6.08546	5.36126	0.0205889	0.233044	Kcnc1	ENSRNOG00000055401
12013	ENSRNOT00000090406	0.95858	2.80341	5.36091	0.020593	0.233044	LOC102551340	ENSRNOG00000047145
1940	ENSRNOT00000010254	0.907567	-0.0210093	5.35956	0.020609	0.233085	Oprk1	ENSRNOG00000007647
3546	ENSRNOT00000017915	0.4807	4.87359	5.35128	0.0207071	0.23406	Twsg1	ENSRNOG00000013340
18833	ENSRNOT00000116976	0.540651	4.6331	5.34484	0.0207837	0.234792	Dhx9	ENSRNOG00000002735
12978	ENSRNOT00000095779	0.86948	1.78905	5.34209	0.0208165	0.235027	Klhl1	ENSRNOG00000031100
6424	ENSRNOT00000033107	0.755015	2.64622	5.33816	0.0208635	0.235423	Rxfp1	ENSRNOG00000024120
1667	ENSRNOT00000008886	0.919415	0.94365	5.31869	0.0210979	0.235671	Slc24a4	ENSRNOG00000006729
4000	ENSRNOT00000020134	-0.403187	5.66782	5.32359	0.0210387	0.235671	Dmwd	ENSRNOG00000014984
4525	ENSRNOT00000022633	-0.364558	6.48323	5.32967	0.0209653	0.235671	Slc25a28	ENSRNOG00000016751
4996	ENSRNOT00000024775	0.865137	2.66476	5.31652	0.0211241	0.235671	Gda	ENSRNOG00000018282
5069	ENSRNOT00000025092	-0.491061	4.66108	5.33119	0.0209471	0.235671	Carns1	ENSRNOG00000018603
6873	ENSRNOT00000037901	0.54962	4.716	5.32792	0.0209865	0.235671	Megf10	ENSRNOG00000013674
8153	ENSRNOT00000056130	-1.33239	2.54592	5.33521	0.0208988	0.235671	Nbeal2	ENSRNOG00000027880
8649	ENSRNOT00000064153	-0.316943	7.63407	5.32687	0.020999	0.235671	Sirt2	ENSRNOG00000020102
10237	ENSRNOT00000078582	0.49805	4.65833	5.31798	0.0211065	0.235671	Prps1	ENSRNOG00000060262
12375	ENSRNOT00000093008	-0.414506	5.43877	5.33049	0.0209555	0.235671	Lamtor2	ENSRNOG00000019908
13257	ENSRNOT00000096742	0.817678	2.05097	5.31826	0.021103	0.235671	Tnfrsf11b	ENSRNOG00000008336
13608	ENSRNOT00000097996	-0.869042	2.44636	5.31979	0.0210845	0.235671	Ddx27	ENSRNOG00000008081
14185	ENSRNOT00000100046	0.756204	4.16976	5.31682	0.0211205	0.235671	Ajap1	ENSRNOG00000050137
15758	ENSRNOT00000105739	-0.417659	6.10179	5.3195	0.021088	0.235671	Clec16a	ENSRNOG00000057378
17767	ENSRNOT00000113170	-0.887083	1.24996	5.31899	0.0210942	0.235671	Pde7b	ENSRNOG00000013436
17865	ENSRNOT00000113506	-0.750394	3.22236	5.32344	0.0210404	0.235671	Mrps18c	ENSRNOG00000002178
18290	ENSRNOT00000115023	-0.370047	7.01353	5.32986	0.0209631	0.235671	Mast3	ENSRNOG00000022753
18432	ENSRNOT00000115514	0.521052	6.26469	5.3313	0.0209457	0.235671	Spock3	ENSRNOG00000029903
18584	ENSRNOT00000116019	-0.322284	7.23279	5.32377	0.0210365	0.235671	Mfn1	ENSRNOG00000011057
19501	ENSRNOT00000119502	-0.506588	4.71932	5.31803	0.0211058	0.235671	Atf6b	ENSRNOG00000000431
3473	ENSRNOT00000017571	0.552987	3.97103	5.31459	0.0211475	0.235799	Mier3	ENSRNOG00000013121
19140	ENSRNOT00000118134	0.834701	3.76652	5.3116	0.0211839	0.236071	MGC116121	ENSRNOG00000015546
5672	ENSRNOT00000027496	-0.387028	7.09638	5.31	0.0212033	0.236154	Atp5mk	ENSRNOG00000020296
14579	ENSRNOT00000101488	-0.870469	0.568699	5.30895	0.0212161	0.236164	LOC120098113	ENSRNOG00000070011
767	ENSRNOT00000004010	0.636906	3.8536	5.29877	0.0213404	0.237414	Mapk9	ENSRNOG00000002823
4557	ENSRNOT00000022788	0.821591	2.53159	5.29628	0.021371	0.23762	Nhlrc2	ENSRNOG00000016948
8309	ENSRNOT00000058074	-0.354817	6.12025	5.29278	0.021414	0.23783	Cog2	ENSRNOG00000018228
8535	ENSRNOT00000061234	0.550695	4.02724	5.29284	0.0214133	0.23783	Moxd1	ENSRNOG00000015321
3089	ENSRNOT00000015808	0.404208	5.80004	5.29034	0.0214441	0.237909	Mtpn	ENSRNOG00000011857
4645	ENSRNOT00000023196	0.723293	2.88322	5.28927	0.0214572	0.237909	Pdgfb	ENSRNOG00000017197
10729	ENSRNOT00000081770	-0.344806	7.06788	5.29007	0.0214474	0.237909	Safb	ENSRNOG00000050543
5303	ENSRNOT00000026100	-0.540762	4.94368	5.28448	0.0215164	0.238312	Shank1	ENSRNOG00000019207
14494	ENSRNOT00000101159	-0.843781	3.21502	5.28366	0.0215265	0.238312	Clta	ENSRNOG00000014635
17273	ENSRNOT00000111254	-0.373246	6.55612	5.28339	0.0215298	0.238312	Smdt1	ENSRNOG00000070907
617	ENSRNOT00000003189	1.83799	3.27939	5.28218	0.0215447	0.238344	Slc15a2	ENSRNOG00000002305
7549	ENSRNOT00000046251	0.632932	6.37547	5.27867	0.0215882	0.238691	Rasa1	ENSRNOG00000029185
9970	ENSRNOT00000076738	-0.701546	3.3127	5.27667	0.0216131	0.238833	Gpank1	ENSRNOG00000000848
14830	ENSRNOT00000102474	-1.05791	1.5381	5.27553	0.0216273	0.238855	Clip1	ENSRNOG00000001247
4006	ENSRNOT00000020155	-0.379301	6.70267	5.27206	0.0216703	0.239064	Pdcd4	ENSRNOG00000014779
11999	ENSRNOT00000090343	1.00303	4.28252	5.27241	0.021666	0.239064	Vps33a	ENSRNOG00000056889
5361	ENSRNOT00000026293	-0.326142	8.49403	5.25564	0.0218757	0.240926	Inpp5j	ENSRNOG00000019361
9559	ENSRNOT00000073425	0.86267	1.67652	5.2572	0.0218561	0.240926	Pcdhb7	ENSRNOG00000046264
16847	ENSRNOT00000109761	-0.754085	3.88263	5.25571	0.0218749	0.240926	Gmppa	ENSRNOG00000019946
8651	ENSRNOT00000064171	0.574532	4.23908	5.2461	0.021996	0.241896	Usp40	ENSRNOG00000018395
10998	ENSRNOT00000083655	0.855565	1.37167	5.24585	0.0219991	0.241896	Abcb7	ENSRNOG00000002790
14710	ENSRNOT00000102006	-0.891967	3.45967	5.24574	0.0220005	0.241896	Map2k2	ENSRNOG00000020005
17681	ENSRNOT00000112798	0.582999	3.9737	5.24448	0.0220165	0.241937	Set	ENSRNOG00000025892
7488	ENSRNOT00000045463	0.690399	3.36681	5.24228	0.0220443	0.242108	Lrch2	ENSRNOG00000029582
8324	ENSRNOT00000058204	-0.461364	4.88124	5.239	0.022086	0.24243	Serp2	ENSRNOG00000038228
863	ENSRNOT00000004463	0.641727	3.33872	5.2341	0.0221483	0.242927	Gulp1	ENSRNOG00000003242
7645	ENSRNOT00000047627	0.438336	6.37277	5.2335	0.0221559	0.242927	Adcy2	ENSRNOG00000032150
4561	ENSRNOT00000022801	-0.468584	4.90129	5.23189	0.0221764	0.243017	Tpm2	ENSRNOG00000016731
18886	ENSRNOT00000117186	0.779534	1.43797	5.2303	0.0221968	0.243106	Ndufaf7	ENSRNOG00000005279
3161	ENSRNOT00000016162	0.793783	0.963971	5.22749	0.0222325	0.243216	Cab39l	ENSRNOG00000011603
10863	ENSRNOT00000082686	-0.377643	6.18637	5.22727	0.0222355	0.243216	Psma7	ENSRNOG00000056853
14999	ENSRNOT00000103086	-0.845035	2.96434	5.22662	0.0222438	0.243216	Srek1ip1-ps1	ENSRNOG00000066565
14510	ENSRNOT00000101231	0.461272	4.97776	5.22016	0.0223265	0.243985	Cdc23	ENSRNOG00000024241
3067	ENSRNOT00000015712	-0.361552	6.63171	5.21547	0.0223868	0.244397	S100a5	ENSRNOG00000011748
14376	ENSRNOT00000100731	0.608076	4.90409	5.21434	0.0224013	0.244397	Sec61a1	ENSRNOG00000013743
14408	ENSRNOT00000100839	0.425711	6.37299	5.21474	0.0223962	0.244397	Aak1	ENSRNOG00000018317
9799	ENSRNOT00000075480	-0.26432	10.1241	5.21211	0.0224301	0.244576	Glul	ENSRNOG00000049560
4431	ENSRNOT00000022203	-0.772656	2.30853	5.21041	0.0224521	0.244631	Card19	ENSRNOG00000016560
12081	ENSRNOT00000090811	1.03848	2.79355	5.20861	0.0224753	0.244631	Zfp933	ENSRNOG00000056374
17782	ENSRNOT00000113212	-0.938607	1.66267	5.20898	0.0224705	0.244631	Brsk2	ENSRNOG00000020021
17794	ENSRNOT00000113256	-0.360583	7.07383	5.20789	0.0224847	0.244631	Cox6b1	ENSRNOG00000066942
3299	ENSRNOT00000016801	-0.559605	3.99987	5.20431	0.022531	0.244733	Rarg	ENSRNOG00000012499
7249	ENSRNOT00000042372	-0.51268	4.9815	5.20579	0.0225117	0.244733	Acox1	ENSRNOG00000008755
14428	ENSRNOT00000100937	-0.843387	2.03818	5.20429	0.0225312	0.244733	NA	ENSRNOG00000065110
1853	ENSRNOT00000009815	-0.389517	5.72095	5.20103	0.0225736	0.244923	Atp5mc1	ENSRNOG00000007235
7725	ENSRNOT00000048768	-0.857988	0.630952	5.20113	0.0225722	0.244923	Cfap92	ENSRNOG00000031408
6499	ENSRNOT00000033969	0.725802	2.64369	5.19699	0.0226261	0.245358	Endod1	ENSRNOG00000024757
6256	ENSRNOT00000031161	-0.443743	4.81601	5.19433	0.0226607	0.245464	Usp35	ENSRNOG00000024961
9285	ENSRNOT00000071173	0.797131	2.95861	5.19484	0.0226541	0.245464	Wwc3	ENSRNOG00000024250
11392	ENSRNOT00000086214	0.826876	0.893156	5.19307	0.0226771	0.245507	Exosc8	ENSRNOG00000051623
3728	ENSRNOT00000018860	-0.36892	5.95269	5.19139	0.0226991	0.24561	Ptpn5	ENSRNOG00000013981
12148	ENSRNOT00000091285	-0.375558	6.23421	5.18582	0.0227719	0.246264	Plec	ENSRNOG00000023781
19069	ENSRNOT00000117884	-0.742842	2.3125	5.18379	0.0227986	0.246417	NA	ENSRNOG00000068419
6781	ENSRNOT00000036995	-0.464299	5.10195	5.1781	0.0228733	0.246847	Adamtsl2	ENSRNOG00000027742
8083	ENSRNOT00000055259	0.397033	6.06384	5.17943	0.0228558	0.246847	Zranb2	ENSRNOG00000009990
9570	ENSRNOT00000073559	-0.757386	4.04239	5.17695	0.0228884	0.246847	Amt	ENSRNOG00000050214
16817	ENSRNOT00000109651	-0.775157	3.19744	5.17723	0.0228847	0.246847	Eln	ENSRNOG00000001469
11184	ENSRNOT00000084768	-0.431477	6.42585	5.17508	0.0229131	0.246978	Tnk2	ENSRNOG00000001769
17614	ENSRNOT00000112511	-0.683342	3.54017	5.172	0.0229537	0.247147	Nmt2	ENSRNOG00000026248
19350	ENSRNOT00000118909	0.441108	5.44308	5.17266	0.0229451	0.247147	Ptpa	ENSRNOG00000018457
1178	ENSRNOT00000005995	-0.760304	1.81533	5.17038	0.0229752	0.247244	Igf1	ENSRNOG00000004517
201	ENSRNOT00000001115	0.420994	7.98452	5.16862	0.0229984	0.247358	Ddx39b	ENSRNOG00000000841
12753	ENSRNOT00000094909	-0.442507	5.71065	5.16734	0.0230155	0.247407	Slc38a10	ENSRNOG00000004604
14867	ENSRNOT00000102609	-0.362403	6.01038	5.16635	0.0230286	0.247413	Dgka	ENSRNOG00000022943
3361	ENSRNOT00000017090	0.854094	1.94657	5.16415	0.0230577	0.247591	Lpcat3	ENSRNOG00000012269
1558	ENSRNOT00000008104	-0.380475	6.01796	5.16178	0.0230892	0.247794	Rfx1	ENSRNOG00000006049
1222	ENSRNOT00000006219	0.509309	5.12603	5.16072	0.0231034	0.247812	Cntn1	ENSRNOG00000004438
7817	ENSRNOT00000049942	0.316529	7.75937	5.15745	0.0231469	0.248084	Canx	ENSRNOG00000003343
18203	ENSRNOT00000114685	0.685551	3.29946	5.15693	0.0231538	0.248084	Btbd3	ENSRNOG00000008088
3355	ENSRNOT00000017071	0.809138	2.51296	5.15532	0.0231752	0.248179	Lgals9	ENSRNOG00000012681
980	ENSRNOT00000005090	0.755415	3.65189	5.15219	0.0232171	0.248223	Tada1	ENSRNOG00000003816
6650	ENSRNOT00000035650	-0.573361	6.05792	5.15262	0.0232113	0.248223	Ganab	ENSRNOG00000019724
13392	ENSRNOT00000097145	0.87566	1.51429	5.15246	0.0232135	0.248223	Vamp1	ENSRNOG00000019219
15980	ENSRNOT00000106543	0.540612	4.10765	5.14725	0.0232832	0.248795	Porcn	ENSRNOG00000004819
2164	ENSRNOT00000011344	0.8286	2.29963	5.1459	0.0233013	0.248854	Tnfrsf11b	ENSRNOG00000008336
10595	ENSRNOT00000080811	0.878282	2.44527	5.14324	0.023337	0.249101	Srpk2	ENSRNOG00000010601
2419	ENSRNOT00000012611	-0.376903	5.78556	5.13715	0.023419	0.24934	Ogfr	ENSRNOG00000009355
5767	ENSRNOT00000027882	-0.39269	5.46282	5.13805	0.0234069	0.24934	Nosip	ENSRNOG00000020543
9877	ENSRNOT00000076079	0.762452	3.61377	5.13689	0.0234226	0.24934	Dlg3	ENSRNOG00000002767
11695	ENSRNOT00000088313	0.962961	2.39847	5.13901	0.023394	0.24934	Vcan	ENSRNOG00000029212
15996	ENSRNOT00000106588	-0.682859	4.70268	5.13861	0.0233994	0.24934	Sgsm1	ENSRNOG00000000708
10047	ENSRNOT00000077243	-0.741034	2.55597	5.13368	0.0234659	0.249667	Csf2ra	ENSRNOG00000049782
13652	ENSRNOT00000098160	-0.502924	6.72588	5.13259	0.0234807	0.249689	Drosha	ENSRNOG00000013451
10056	ENSRNOT00000077308	-0.799226	0.955734	5.12932	0.023525	0.249757	Hrh3	ENSRNOG00000061153
10700	ENSRNOT00000081565	-0.706683	2.79904	5.13036	0.0235108	0.249757	Clasrp	ENSRNOG00000046000
19580	ENSRNOT00000119756	0.577254	4.30197	5.12966	0.0235203	0.249757	Pip5k1a	ENSRNOG00000021068
17689	ENSRNOT00000112818	-0.722334	2.96221	5.12819	0.0235403	0.249785	NA	ENSRNOG00000070519
2420	ENSRNOT00000012616	-0.358972	7.31797	5.12679	0.0235592	0.249852	Ndufb9	ENSRNOG00000008987
10939	ENSRNOT00000083272	-0.412817	6.04954	5.1246	0.023589	0.249899	AABR07064980.1	ENSRNOG00000055777
11752	ENSRNOT00000088661	0.588917	3.82282	5.1252	0.0235809	0.249899	Wdr44	ENSRNOG00000029068
5385	ENSRNOT00000026373	0.3721	6.40319	5.11852	0.0236718	0.250642	Gnao1	ENSRNOG00000019482
13442	ENSRNOT00000097353	-0.943177	2.27591	5.11587	0.0237079	0.25089	Phf23	ENSRNOG00000017657
14828	ENSRNOT00000102459	-0.781269	2.62745	5.11344	0.0237412	0.251108	Dynlt2b	ENSRNOG00000001758
8084	ENSRNOT00000055271	-0.37443	5.8944	5.11122	0.0237715	0.251261	Ppp1r1a	ENSRNOG00000036827
14849	ENSRNOT00000102550	-0.84305	4.20505	5.11033	0.0237837	0.251261	Dgcr6	ENSRNOG00000001880
14864	ENSRNOT00000102600	0.859904	2.66856	5.10959	0.0237939	0.251261	B3galt1	ENSRNOG00000007625
15504	ENSRNOT00000104859	-0.692652	3.07458	5.10221	0.0238954	0.252198	Gripap1	ENSRNOG00000009071
11305	ENSRNOT00000085680	-0.680538	3.25746	5.09974	0.0239294	0.252422	Igf1	ENSRNOG00000004517
5248	ENSRNOT00000025857	0.563266	5.73865	5.09807	0.0239525	0.252531	Gsn	ENSRNOG00000018991
3744	ENSRNOT00000018927	-0.326103	7.17318	5.08657	0.0241119	0.252763	Npdc1	ENSRNOG00000013102
4772	ENSRNOT00000023811	-0.405629	5.81295	5.08879	0.024081	0.252763	Ndufa2	ENSRNOG00000017571
8579	ENSRNOT00000061903	0.679935	4.25336	5.08885	0.0240802	0.252763	Pcmtd1	ENSRNOG00000005730
9111	ENSRNOT00000067762	-0.344356	6.40774	5.08782	0.0240945	0.252763	Inpp5b	ENSRNOG00000048506
9313	ENSRNOT00000071405	0.571438	3.78351	5.08854	0.0240845	0.252763	Kdr	ENSRNOG00000046829
10503	ENSRNOT00000080198	-1.09463	4.18796	5.08814	0.02409	0.252763	Rpph1	ENSRNOG00000054493
10563	ENSRNOT00000080591	0.746052	5.61162	5.08632	0.0241153	0.252763	Ski	ENSRNOG00000055340
11006	ENSRNOT00000083702	0.581978	4.85975	5.09341	0.0240169	0.252763	Akap12	ENSRNOG00000019549
13883	ENSRNOT00000099030	0.966179	3.84256	5.08746	0.0240995	0.252763	Pias4	ENSRNOG00000020230
14757	ENSRNOT00000102189	0.834281	2.23426	5.08702	0.0241056	0.252763	Nhsl1	ENSRNOG00000060603
15551	ENSRNOT00000105012	0.554549	4.024	5.09354	0.0240151	0.252763	Serinc3	ENSRNOG00000009552
7575	ENSRNOT00000046590	0.483928	4.67679	5.07885	0.0242195	0.25372	Ei24	ENSRNOG00000030391
19541	ENSRNOT00000119623	-0.460207	4.6525	5.07718	0.0242427	0.253829	NA	ENSRNOG00000064136
17744	ENSRNOT00000113055	0.774818	3.85332	5.0714	0.0243237	0.254542	Cnnm1	ENSRNOG00000016302
7519	ENSRNOT00000045963	0.813027	1.54414	5.06887	0.0243592	0.254617	Sox11	ENSRNOG00000030034
9578	ENSRNOT00000073638	0.662522	3.67578	5.06968	0.0243478	0.254617	Tmem178b	ENSRNOG00000047635
10106	ENSRNOT00000077651	-0.325634	7.38981	5.06626	0.0243959	0.254617	Sptbn4	ENSRNOG00000055371
12428	ENSRNOT00000093460	-0.398023	6.61258	5.06355	0.0244341	0.254617	LOC100361933	ENSRNOG00000062272
14642	ENSRNOT00000101739	-0.75835	3.16287	5.06624	0.0243962	0.254617	NA	ENSRNOG00000063619
17479	ENSRNOT00000112007	0.755069	2.8876	5.06427	0.024424	0.254617	Notch3	ENSRNOG00000004346
17591	ENSRNOT00000112430	-0.431427	5.73877	5.06789	0.0243731	0.254617	Zcchc7	ENSRNOG00000013078
18326	ENSRNOT00000115141	-0.531247	6.05105	5.06431	0.0244235	0.254617	Srrm3	ENSRNOG00000001439
1866	ENSRNOT00000009900	0.505229	4.94562	5.06014	0.0244823	0.254716	Plxna2	ENSRNOG00000007324
12656	ENSRNOT00000094500	-0.34542	6.36741	5.06136	0.024465	0.254716	Fdps	ENSRNOG00000043377
14000	ENSRNOT00000099455	-0.330343	7.41768	5.06061	0.0244757	0.254716	LOC685085	ENSRNOG00000062325
6866	ENSRNOT00000037869	0.77098	2.08558	5.05857	0.0245045	0.254813	Dpy19l4	ENSRNOG00000025416
18810	ENSRNOT00000116906	-0.408774	5.22453	5.05641	0.024535	0.254997	Wdr46	ENSRNOG00000031171
2433	ENSRNOT00000012671	0.638309	4.64072	5.04894	0.024641	0.255888	Fnip1	ENSRNOG00000009104
19345	ENSRNOT00000118879	0.853969	2.44278	5.04854	0.0246467	0.255888	Serpinb6a	ENSRNOG00000017962
14478	ENSRNOT00000101109	-1.11989	1.91703	5.04357	0.0247175	0.256488	Ergic1	ENSRNOG00000003508
10556	ENSRNOT00000080524	-1.04779	1.98115	5.04041	0.0247626	0.256821	Stk11ip	ENSRNOG00000020107
15727	ENSRNOT00000105645	-0.412095	6.48828	5.03939	0.0247773	0.256838	Pdxp	ENSRNOG00000009570
14189	ENSRNOT00000100065	-0.438496	5.41601	5.03717	0.024809	0.257032	RGD1560394	ENSRNOG00000065022
3696	ENSRNOT00000018682	0.492152	4.57926	5.02832	0.0249361	0.257689	Cbln2	ENSRNOG00000013654
3697	ENSRNOT00000018684	0.65277	3.61664	5.02886	0.0249283	0.257689	Rnf149	ENSRNOG00000013946
7417	ENSRNOT00000044565	0.594341	4.12998	5.03132	0.0248929	0.257689	Dusp8	ENSRNOG00000029394
9086	ENSRNOT00000067589	-1.30482	1.49822	5.02731	0.0249507	0.257689	Kansl1l	ENSRNOG00000028149
17145	ENSRNOT00000110839	-0.480688	6.78546	5.02819	0.024938	0.257689	LOC100365810	ENSRNOG00000019106
18714	ENSRNOT00000116527	-0.861081	0.90269	5.02801	0.0249405	0.257689	Atg10	ENSRNOG00000016342
13841	ENSRNOT00000098825	0.35245	6.42394	5.02513	0.0249821	0.257878	Bgn	ENSRNOG00000055962
1529	ENSRNOT00000007914	0.398185	5.44623	5.02329	0.0250086	0.257883	Tmx2	ENSRNOG00000005308
3989	ENSRNOT00000020042	0.410081	6.78583	5.02388	0.0250001	0.257883	Etnk1	ENSRNOG00000014856
13455	ENSRNOT00000097401	0.772607	2.85234	5.019	0.0250707	0.258388	Eif2b3	ENSRNOG00000018375
9474	ENSRNOT00000072703	-0.361961	5.83759	5.01535	0.0251235	0.258662	Dus3l	ENSRNOG00000050381
13034	ENSRNOT00000095933	-0.566057	3.77285	5.01598	0.0251144	0.258662	NA	ENSRNOG00000068825
2577	ENSRNOT00000013408	0.851237	2.10096	5.0129	0.0251591	0.258734	Htr2a	ENSRNOG00000010063
10365	ENSRNOT00000079351	0.867907	4.00185	5.01216	0.0251698	0.258734	Zfyve26	ENSRNOG00000059875
16149	ENSRNOT00000107178	-0.614246	5.18366	5.01262	0.0251632	0.258734	NA	ENSRNOG00000069208
351	ENSRNOT00000001743	-0.27094	9.88138	5.00945	0.0252093	0.259005	S100b	ENSRNOG00000001295
18240	ENSRNOT00000114821	-0.814737	1.73945	5.00762	0.025236	0.259145	NA	ENSRNOG00000064998
8001	ENSRNOT00000052341	0.730857	2.29215	5.00589	0.0252612	0.259269	Gfral	ENSRNOG00000032063
16245	ENSRNOT00000107562	0.689802	5.96167	5.00471	0.0252784	0.259311	Syp	ENSRNOG00000059720
10702	ENSRNOT00000081570	0.686703	4.18596	4.99873	0.0253659	0.260073	Rgs12	ENSRNOG00000030568
704	ENSRNOT00000003674	-0.372261	6.75112	4.99718	0.0253886	0.260146	Ndufb4	ENSRNOG00000002721
11649	ENSRNOT00000088018	0.584098	3.66151	4.99555	0.0254126	0.260146	Rnf103	ENSRNOG00000007272
17220	ENSRNOT00000111057	0.753214	1.93322	4.99629	0.0254017	0.260146	Tigar	ENSRNOG00000051816
8012	ENSRNOT00000054761	0.946386	1.74529	4.99444	0.0254289	0.260179	Sgms1	ENSRNOG00000012536
16112	ENSRNOT00000107051	0.807586	2.1592	4.99234	0.0254597	0.260359	Chl1	ENSRNOG00000045771
9262	ENSRNOT00000070920	0.456406	4.88033	4.9872	0.0255355	0.260999	Uxs1	ENSRNOG00000045605
16672	ENSRNOT00000109096	-0.917783	0.0891572	4.98454	0.0255748	0.261265	AABR07071891.3	ENSRNOG00000049295
10681	ENSRNOT00000081430	-0.317119	7.6092	4.98091	0.0256285	0.261679	Scaf1	ENSRNOG00000056946
5674	ENSRNOT00000027499	0.651476	3.37903	4.97967	0.0256468	0.26173	Fam53c	ENSRNOG00000020261
689	ENSRNOT00000003573	0.421542	5.42742	4.97864	0.0256621	0.261735	Magee1	ENSRNOG00000002660
2979	ENSRNOT00000015316	0.809639	2.75867	4.97696	0.025687	0.261735	Inmt	ENSRNOG00000011250
15715	ENSRNOT00000105585	-0.822664	1.49303	4.9775	0.0256791	0.261735	Fn3k	ENSRNOG00000036659
2710	ENSRNOT00000014020	0.84981	0.744475	4.96725	0.0258317	0.263023	Tlr4	ENSRNOG00000010522
4457	ENSRNOT00000022348	-0.317947	8.35639	4.96668	0.0258401	0.263023	Rps23	ENSRNOG00000016580
1664	ENSRNOT00000008879	0.501163	4.61704	4.96357	0.0258867	0.263118	Lrrn1	ENSRNOG00000006802
13040	ENSRNOT00000095949	-0.778204	2.39075	4.96238	0.0259046	0.263118	Nrros	ENSRNOG00000001752
15138	ENSRNOT00000103579	0.810955	2.65321	4.96302	0.0258949	0.263118	Msn	ENSRNOG00000030118
16208	ENSRNOT00000107387	0.459	5.4467	4.96293	0.0258963	0.263118	Pds5b	ENSRNOG00000001098
19077	ENSRNOT00000117927	0.974138	0.655033	4.96072	0.0259294	0.263118	Snx10	ENSRNOG00000011944
19291	ENSRNOT00000118700	1.8101	4.82719	4.96107	0.0259242	0.263118	Glul	ENSRNOG00000049560
7490	ENSRNOT00000045477	-0.529269	4.33403	4.95804	0.0259696	0.263275	Dpm3	ENSRNOG00000029077
11710	ENSRNOT00000088421	0.424313	5.74342	4.95791	0.0259716	0.263275	Bcl11b	ENSRNOG00000005776
11884	ENSRNOT00000089575	-0.365723	6.17497	4.95703	0.0259849	0.263275	Man2c1	ENSRNOG00000030654
12417	ENSRNOT00000093376	-0.293458	8.36857	4.95069	0.0260803	0.263971	Gpx4	ENSRNOG00000013604
15768	ENSRNOT00000105776	-0.381414	5.52051	4.95121	0.0260724	0.263971	Gtpbp6	ENSRNOG00000062521
12223	ENSRNOT00000091809	0.975954	1.25931	4.9465	0.0261435	0.264475	Bicral	ENSRNOG00000016229
8366	ENSRNOT00000058852	0.675279	4.10943	4.94508	0.0261651	0.264558	Wac	ENSRNOG00000018698
5756	ENSRNOT00000027834	0.341441	6.56011	4.93876	0.0262609	0.265391	Fads1	ENSRNOG00000020480
2620	ENSRNOT00000013581	0.770946	3.41091	4.93687	0.0262896	0.265409	Arih1	ENSRNOG00000009887
18595	ENSRNOT00000116066	0.843196	2.92996	4.93734	0.0262825	0.265409	Atp5f1c	ENSRNOG00000019223
10560	ENSRNOT00000080575	0.929368	0.727514	4.93428	0.026329	0.265671	Pot1	ENSRNOG00000019986
19701	ENSRNOT00000120166	-0.765562	1.94801	4.93333	0.0263436	0.265682	Pfdn5	ENSRNOG00000012985
680	ENSRNOT00000003544	-0.433917	4.96338	4.93239	0.0263579	0.265691	Dexi	ENSRNOG00000002635
2727	ENSRNOT00000014087	-0.407208	5.48939	4.931	0.0263791	0.26571	Rnf208	ENSRNOG00000010607
9948	ENSRNOT00000076604	0.889193	5.44811	4.9305	0.0263867	0.26571	Dync1li2	ENSRNOG00000025791
16875	ENSRNOT00000109861	0.667627	3.03663	4.92957	0.0264008	0.265717	Mbtd1	ENSRNOG00000049988
4981	ENSRNOT00000024709	0.484041	5.82123	4.92753	0.026432	0.265895	Kcnip2	ENSRNOG00000018018
773	ENSRNOT00000004038	0.467079	5.00607	4.92005	0.0265467	0.265904	AABR07039336.2	ENSRNOG00000003025
1603	ENSRNOT00000008454	0.424211	5.41097	4.92049	0.0265399	0.265904	Zhx1	ENSRNOG00000006412
7037	ENSRNOT00000039728	-0.365054	6.56938	4.91992	0.0265488	0.265904	Ndufs7	ENSRNOG00000024568
8419	ENSRNOT00000059628	-0.838875	0.384051	4.92198	0.0265171	0.265904	Agrp	ENSRNOG00000039001
10377	ENSRNOT00000079414	0.49057	4.71624	4.92325	0.0264976	0.265904	B4galt5	ENSRNOG00000008283
14284	ENSRNOT00000100370	0.54222	6.25976	4.92248	0.0265095	0.265904	Clasp2	ENSRNOG00000009161
16644	ENSRNOT00000108988	-0.674121	4.28293	4.91957	0.0265541	0.265904	Gpr107	ENSRNOG00000023589
16771	ENSRNOT00000109437	0.670914	2.75108	4.9238	0.0264892	0.265904	Armc8	ENSRNOG00000014521
16971	ENSRNOT00000110211	0.835789	1.48236	4.91995	0.0265482	0.265904	Pgap6	ENSRNOG00000020374
6681	ENSRNOT00000035973	-0.373582	5.91725	4.91843	0.0265717	0.265946	Limd2	ENSRNOG00000025448
2891	ENSRNOT00000014913	-0.397581	5.39945	4.91512	0.0266227	0.266186	Coq6	ENSRNOG00000011164
19449	ENSRNOT00000119257	-0.349091	6.29741	4.91536	0.0266189	0.266186	Ddt	ENSRNOG00000068887
12693	ENSRNOT00000094613	0.387232	6.34792	4.90521	0.0267759	0.267583	Prkar1a	ENSRNOG00000049876
8229	ENSRNOT00000057001	1.11602	2.8693	4.90271	0.0268146	0.267834	Tp53i11	ENSRNOG00000008738
10711	ENSRNOT00000081625	0.985722	1.93866	4.89882	0.0268751	0.268293	Rps6ka6	ENSRNOG00000002592
14500	ENSRNOT00000101193	0.830365	2.45983	4.89713	0.0269014	0.268293	Rbm12b	ENSRNOG00000016330
16564	ENSRNOT00000108716	0.478439	4.84102	4.89728	0.026899	0.268293	Ireb2	ENSRNOG00000013271
13314	ENSRNOT00000096921	-0.901378	2.16136	4.89555	0.026926	0.268403	Rfxank	ENSRNOG00000033318
6346	ENSRNOT00000032157	0.797303	0.593285	4.89361	0.0269563	0.268435	Rnasel	ENSRNOG00000027017
6476	ENSRNOT00000033706	0.399479	5.58832	4.89439	0.0269441	0.268435	Copg2	ENSRNOG00000011014
7585	ENSRNOT00000046754	0.397117	6.03397	4.89083	0.0269997	0.268732	Acox1	ENSRNOG00000008755
16520	ENSRNOT00000108567	0.642452	3.59856	4.88949	0.0270206	0.268804	Litaf	ENSRNOG00000002520
3847	ENSRNOT00000019393	-0.312692	7.7373	4.8879	0.0270456	0.268917	Dbn1	ENSRNOG00000014170
7476	ENSRNOT00000045301	-0.350712	7.50046	4.88569	0.0270802	0.269125	RGD1562402	ENSRNOG00000031859
12821	ENSRNOT00000095173	-0.507024	5.05143	4.8826	0.0271286	0.269407	Itpk1	ENSRNOG00000008051
14581	ENSRNOT00000101491	-0.663295	3.81454	4.88215	0.0271358	0.269407	Zfp423	ENSRNOG00000014658
6836	ENSRNOT00000037523	0.843506	2.90987	4.87691	0.0272183	0.270091	Zfyve9	ENSRNOG00000027183
6666	ENSRNOT00000035814	0.745398	2.86324	4.87392	0.0272655	0.270186	Vldlr	ENSRNOG00000027491
7427	ENSRNOT00000044711	-0.509598	5.83804	4.87387	0.0272664	0.270186	LOC120102993	ENSRNOG00000031506
8011	ENSRNOT00000054757	0.755071	2.21065	4.87354	0.0272715	0.270186	Ifit2	ENSRNOG00000036604
13259	ENSRNOT00000096755	-0.408169	6.65259	4.87283	0.0272827	0.270186	Srrm1	ENSRNOG00000018194
12228	ENSRNOT00000091866	0.965574	3.39977	4.86926	0.0273393	0.27034	Kdm4a	ENSRNOG00000019956
16340	ENSRNOT00000107939	-1.16475	2.12626	4.86951	0.0273352	0.27034	Zfp748	ENSRNOG00000069921
17705	ENSRNOT00000112878	0.636634	3.91926	4.86975	0.0273314	0.27034	Zfp141	ENSRNOG00000070234
623	ENSRNOT00000003219	-0.428376	5.41206	4.86512	0.027405	0.270854	Scpep1	ENSRNOG00000002358
6733	ENSRNOT00000036460	0.712748	3.10686	4.86331	0.0274337	0.270871	Pon2	ENSRNOG00000009112
[truncated: 17,748 more rows]

## Sheet: Prefrontal Cortex Scr1 vs ASO3 
	Transcript stable ID	logFC	logCPM	LR	PValue	FDR	Gene name	Gene stable ID
1304	ENSRNOT00000007276	-1.71475	5.89949	42.0739	8.78906e-11	7.79019e-07	Zc3h15	ENSRNOG00000005256
10277	ENSRNOT00000085644	-2.09479	5.80376	42.8247	5.98729e-11	7.79019e-07	Myl6	ENSRNOG00000054140
11542	ENSRNOT00000094774	-2.10496	3.69866	32.183	1.4031e-08	8.2909e-05	Psip1	ENSRNOG00000011498
14655	ENSRNOT00000107537	-2.87235	5.13733	29.6311	5.22597e-08	0.000231602	Rpl24	ENSRNOG00000001611
12258	ENSRNOT00000097714	2.88468	2.44341	27.9091	1.27152e-07	0.000450806	Taldo1	ENSRNOG00000018367
16215	ENSRNOT00000113995	-1.58152	4.21004	26.737	2.33112e-07	0.00068873	Psmc1	ENSRNOG00000003951
15917	ENSRNOT00000112681	1.33161	7.26156	26.3362	2.86859e-07	0.00072645	Selenow	ENSRNOG00000067799
11951	ENSRNOT00000096459	-1.26652	4.83895	25.8294	3.7296e-07	0.000826433	Zeb2	ENSRNOG00000004677
1213	ENSRNOT00000006754	-1.77698	5.06765	25.3559	4.76685e-07	0.000938911	Rpl7a	ENSRNOG00000070974
6917	ENSRNOT00000046873	-2.38843	2.1584	24.9167	5.98604e-07	0.00106114	U2surp	ENSRNOG00000008607
15969	ENSRNOT00000112895	-1.68007	3.78407	22.4307	2.17868e-06	0.00351104	Nucks1	ENSRNOG00000047287
219	ENSRNOT00000001310	-1.05135	6.53869	21.4608	3.61143e-06	0.00457285	Pdap1	ENSRNOG00000000990
14426	ENSRNOT00000106586	1.77345	3.5732	21.573	3.40621e-06	0.00457285	Spry2	ENSRNOG00000010058
15570	ENSRNOT00000111281	-1.35572	4.30634	21.6588	3.25718e-06	0.00457285	Prdx5	ENSRNOG00000021125
10136	ENSRNOT00000084582	2.21292	1.35604	21.1418	4.26529e-06	0.00475967	Gabbr1	ENSRNOG00000000774
13941	ENSRNOT00000104670	-2.02443	3.45259	21.128	4.29597e-06	0.00475967	Rpl14	ENSRNOG00000019007
14436	ENSRNOT00000106625	-2.45098	12.4295	20.5156	5.9146e-06	0.00616754	NA	ENSRNOG00000070284
10737	ENSRNOT00000089074	1.28391	7.21165	19.8288	8.46968e-06	0.00834122	Myl6	ENSRNOG00000054140
9152	ENSRNOT00000077189	-0.970925	6.16784	19.2234	1.16278e-05	0.0103063	Gtf2i	ENSRNOG00000001479
15506	ENSRNOT00000111038	1.80601	2.71162	19.2429	1.15097e-05	0.0103063	Bzw1	ENSRNOG00000013977
13195	ENSRNOT00000101499	-1.92927	1.57652	18.9607	1.33441e-05	0.011087	Rtn2	ENSRNOG00000016603
13835	ENSRNOT00000104212	-1.71772	2.40421	18.9022	1.37594e-05	0.011087	Tceal1	ENSRNOG00000002387
10363	ENSRNOT00000086260	-1.45549	3.99071	18.736	1.50119e-05	0.0110881	Top1	ENSRNOG00000047611
15930	ENSRNOT00000112753	-1.74249	3.38393	18.7551	1.48624e-05	0.0110881	Eef1a1	ENSRNOG00000009439
8826	ENSRNOT00000074517	2.44344	1.60075	17.972	2.24173e-05	0.0158956	Tmem120b	ENSRNOG00000048050
11644	ENSRNOT00000095241	-1.44411	2.70219	17.7034	2.58171e-05	0.0176023	Cox7a2l	ENSRNOG00000004526
13070	ENSRNOT00000100932	1.04574	4.6079	17.459	2.93566e-05	0.0192743	Anp32e	ENSRNOG00000021168
16840	ENSRNOT00000116629	-1.07706	5.02022	17.0424	3.65546e-05	0.023143	Guk1	ENSRNOG00000002928
1358	ENSRNOT00000007608	-0.926494	5.3248	16.5677	4.69449e-05	0.0286963	Pclo	ENSRNOG00000005726
11374	ENSRNOT00000094017	1.11586	4.61964	16.3401	5.29326e-05	0.0306106	Myh14	ENSRNOG00000020014
16684	ENSRNOT00000115918	1.66732	1.03509	16.3188	5.35302e-05	0.0306106	Nat8f1	ENSRNOG00000015799
15248	ENSRNOT00000110033	-1.16698	4.41122	16.185	5.74472e-05	0.0318239	Acsl5	ENSRNOG00000016265
10754	ENSRNOT00000089168	-0.849056	5.55616	15.737	7.27848e-05	0.0388073	Mea1	ENSRNOG00000017144
16711	ENSRNOT00000116017	-0.984503	5.40122	15.6947	7.44315e-05	0.0388073	Eif4g2	ENSRNOG00000017158
11540	ENSRNOT00000094769	-1.33994	3.38995	15.514	8.18952e-05	0.0414787	Gng7	ENSRNOG00000019857
15219	ENSRNOT00000109912	-1.62129	2.99612	15.4258	8.58077e-05	0.0422532	Mrps36	ENSRNOG00000061213
15194	ENSRNOT00000109835	-0.981238	5.83734	15.3345	9.00555e-05	0.0431463	Mbnl2	ENSRNOG00000010737
10822	ENSRNOT00000089743	1.41552	2.86783	15.2109	9.61481e-05	0.0448369	Fmr1	ENSRNOG00000057464
14074	ENSRNOT00000105146	-1.82922	1.15587	15.1625	9.86427e-05	0.0448369	Ebag9	ENSRNOG00000004220
15287	ENSRNOT00000110189	-1.63649	4.09806	14.9585	0.000109902	0.0487058	R3hdm2	ENSRNOG00000007801
1489	ENSRNOT00000008537	-1.5516	0.791196	14.8898	0.000113975	0.0492789	Amdhd2	ENSRNOG00000006460
14452	ENSRNOT00000106706	-1.53908	3.2252	14.4698	0.000142425	0.0601134	Rph3a	ENSRNOG00000001368
6233	ENSRNOT00000037551	-1.04467	5.2981	14.1002	0.000173327	0.0714551	LOC100363452	ENSRNOG00000021395
845	ENSRNOT00000004867	-1.44763	2.40418	13.9524	0.000187498	0.0727046	Sumo2	ENSRNOG00000003661
12785	ENSRNOT00000099810	-0.856626	6.30621	13.9803	0.000184732	0.0727046	Myl6	ENSRNOG00000054140
13729	ENSRNOT00000103788	-0.93806	5.83033	13.9408	0.000188662	0.0727046	Psmb1	ENSRNOG00000001488
13608	ENSRNOT00000103343	-1.79051	2.93898	13.8658	0.000196337	0.0730802	Rpl18	ENSRNOG00000021035
15879	ENSRNOT00000112529	1.68137	2.2789	13.8511	0.000197882	0.0730802	Atp9a	ENSRNOG00000049484
11771	ENSRNOT00000095754	1.50513	2.95315	13.7856	0.000204896	0.0741263	Itpa	ENSRNOG00000021233
8356	ENSRNOT00000068216	-0.986702	4.61279	13.7443	0.00020945	0.0742586	Rgcc	ENSRNOG00000042960
12999	ENSRNOT00000100646	0.868258	6.25038	13.6017	0.000225978	0.0785474	LOC100365810	ENSRNOG00000019106
2446	ENSRNOT00000013785	-1.28747	4.30529	13.5239	0.00023554	0.0787815	Pgm1	ENSRNOG00000009889
6094	ENSRNOT00000035989	-2.01245	2.48827	13.5476	0.000232583	0.0787815	Arhgap20	ENSRNOG00000025624
16553	ENSRNOT00000115390	1.0024	6.06609	13.4862	0.00024033	0.078895	Rps12	ENSRNOG00000016411
6644	ENSRNOT00000043005	-1.18509	4.44031	13.4037	0.000251127	0.0809407	LOC100363469	ENSRNOG00000031579
12219	ENSRNOT00000097517	-1.10997	3.59018	13.0618	0.000301387	0.0921152	Arl2bp	ENSRNOG00000016991
15075	ENSRNOT00000109318	0.953143	5.1387	13.0678	0.00030041	0.0921152	Ttl	ENSRNOG00000018205
16260	ENSRNOT00000114141	-0.755452	6.21637	13.0872	0.000297318	0.0921152	RGD1560398	ENSRNOG00000069648
2708	ENSRNOT00000015213	-1.29056	3.26879	12.5046	0.000405949	0.121971	Aimp1	ENSRNOG00000011384
16693	ENSRNOT00000115955	-1.18918	3.19666	12.2483	0.00046568	0.133147	Antkmt	ENSRNOG00000019684
17284	ENSRNOT00000118483	-1.31678	3.71889	12.253	0.000464501	0.133147	Uqcrb	ENSRNOG00000024967
17662	ENSRNOT00000120093	-1.37745	1.73226	12.2705	0.000460185	0.133147	NA	ENSRNOG00000062746
17173	ENSRNOT00000118039	-1.55086	1.74829	12.1922	0.000479894	0.135033	Tcf4	ENSRNOG00000012405
7760	ENSRNOT00000061041	1.05924	3.98261	11.9928	0.000534055	0.147925	Rpl26-ps2	ENSRNOG00000069113
2895	ENSRNOT00000016167	-1.53248	1.59841	11.8877	0.000565058	0.148601	Npc1	ENSRNOG00000012016
4566	ENSRNOT00000024829	1.74861	1.86667	11.9366	0.000550431	0.148601	RGD1307554	ENSRNOG00000018408
9914	ENSRNOT00000082958	-1.5989	1.74735	11.9149	0.000556861	0.148601	Agpat4	ENSRNOG00000017731
15448	ENSRNOT00000110833	1.63581	1.60627	11.8714	0.000570027	0.148601	Smc6	ENSRNOG00000004908
9764	ENSRNOT00000081819	1.96015	4.35303	11.7697	0.000602024	0.148997	Idh3g	ENSRNOG00000055572
11188	ENSRNOT00000092540	-0.86512	4.90882	11.76	0.000605167	0.148997	Map2	ENSRNOG00000011841
11352	ENSRNOT00000093924	1.10078	5.47126	11.8234	0.000584922	0.148997	Fkbp3	ENSRNOG00000004629
15431	ENSRNOT00000110789	-0.96455	3.89857	11.7817	0.000598154	0.148997	Tceal9	ENSRNOG00000034198
8346	ENSRNOT00000068150	1.27278	2.7671	11.6763	0.000633015	0.153719	Aqp4	ENSRNOG00000016043
15222	ENSRNOT00000109925	-1.48063	2.88843	11.6108	0.000655691	0.157073	Sub1	ENSRNOG00000067555
32	ENSRNOT00000000149	-1.37652	1.4814	11.3753	0.00074427	0.174937	Ly86	ENSRNOG00000000137
10485	ENSRNOT00000087150	1.29035	3.02589	11.3611	0.000749996	0.174937	Sncg	ENSRNOG00000058006
7768	ENSRNOT00000061132	-1.38557	3.28036	11.2987	0.000775607	0.178561	Zfr2	ENSRNOG00000020416
14684	ENSRNOT00000107655	1.38585	4.63104	11.2317	0.000804125	0.182753	Cdk2ap1	ENSRNOG00000001070
4036	ENSRNOT00000022184	-0.856393	6.29417	11.0109	0.000905791	0.201277	Rps12	ENSRNOG00000016411
12752	ENSRNOT00000099700	1.35716	3.96467	11.0057	0.000908341	0.201277	Suclg1	ENSRNOG00000005587
229	ENSRNOT00000001367	1.51233	1.9302	10.8495	0.000988249	0.204238	Evi5l	ENSRNOG00000001034
2014	ENSRNOT00000011499	-0.753564	6.81275	10.9323	0.000945002	0.204238	Arpc3	ENSRNOG00000008673
4726	ENSRNOT00000025615	-0.944507	3.99811	10.8446	0.000990833	0.204238	Eif1b	ENSRNOG00000018848
12362	ENSRNOT00000098165	1.35878	0.251284	10.8484	0.000988819	0.204238	Dnajb2	ENSRNOG00000019506
12942	ENSRNOT00000100423	-0.823243	5.26799	10.8728	0.000975863	0.204238	R3hdm1	ENSRNOG00000004099
15449	ENSRNOT00000110839	-0.802758	6.8809	10.8807	0.000971708	0.204238	LOC100365810	ENSRNOG00000019106
7951	ENSRNOT00000064716	-1.65409	1.58987	10.8209	0.0010036	0.204493	Rps6ka5	ENSRNOG00000004362
4246	ENSRNOT00000023274	-0.746683	5.61175	10.7483	0.00104374	0.205583	Cdk11b	ENSRNOG00000017213
4749	ENSRNOT00000025689	-0.836286	6.30274	10.7701	0.00103152	0.205583	Gstm7	ENSRNOG00000018937
16090	ENSRNOT00000113471	1.43201	1.13445	10.761	0.00103662	0.205583	Plcd1	ENSRNOG00000032238
930	ENSRNOT00000005289	0.802982	4.99322	10.6812	0.00108229	0.207869	Rab3gap1	ENSRNOG00000003953
12542	ENSRNOT00000098879	1.47389	1.36249	10.6672	0.00109053	0.207869	Nmi	ENSRNOG00000027502
15692	ENSRNOT00000111759	1.48484	2.04967	10.7035	0.00106932	0.207869	Gkap1	ENSRNOG00000019272
11407	ENSRNOT00000094155	-1.19289	3.8891	10.5484	0.00116286	0.215347	Nsun2	ENSRNOG00000017254
16778	ENSRNOT00000116383	-0.683687	7.91946	10.5431	0.0011662	0.215347	NA	ENSRNOG00000068023
17578	ENSRNOT00000119733	-0.963214	4.63923	10.5564	0.00115786	0.215347	Fbxo2	ENSRNOG00000009409
6866	ENSRNOT00000046155	-0.835048	5.3562	10.4962	0.00119621	0.216381	Tcf25	ENSRNOG00000017023
12721	ENSRNOT00000099608	1.66186	0.588964	10.5126	0.00118566	0.216381	Cask	ENSRNOG00000060946
9132	ENSRNOT00000077053	-0.781585	5.98451	10.4413	0.00123229	0.220655	Cdh13	ENSRNOG00000014371
17156	ENSRNOT00000117956	-1.39604	3.24259	10.4042	0.00125726	0.222875	Csad	ENSRNOG00000011573
7740	ENSRNOT00000060757	-1.19329	3.85343	10.3126	0.00132126	0.231901	Rmnd1	ENSRNOG00000019501
8535	ENSRNOT00000071796	-0.799119	4.89244	10.2341	0.00137866	0.239603	Pomp	ENSRNOG00000049229
10617	ENSRNOT00000088198	-1.34751	4.61933	10.1765	0.00142241	0.241011	Ap2b1	ENSRNOG00000061543
15061	ENSRNOT00000109278	-0.69386	6.14345	10.1878	0.00141372	0.241011	Mycbp2	ENSRNOG00000010479
16790	ENSRNOT00000116426	-1.09769	4.28677	10.1699	0.00142755	0.241011	Cycs-ps9	ENSRNOG00000010452
1255	ENSRNOT00000006947	-0.715094	5.9237	10.0797	0.0014991	0.244584	Mapt	ENSRNOG00000005133
11756	ENSRNOT00000095689	-0.912995	3.73136	10.0738	0.0015039	0.244584	Ube2a	ENSRNOG00000039985
16536	ENSRNOT00000115328	-0.689038	5.50882	10.0932	0.00148816	0.244584	Copb2	ENSRNOG00000060723
17251	ENSRNOT00000118351	-0.676411	6.76925	10.0812	0.00149792	0.244584	Sez6l2	ENSRNOG00000027098
1595	ENSRNOT00000009169	-0.956987	3.70998	10.0057	0.00156058	0.244817	Scaper	ENSRNOG00000006864
5004	ENSRNOT00000026755	-0.775012	5.86777	10.0091	0.00155766	0.244817	Ypel3	ENSRNOG00000019721
7944	ENSRNOT00000064679	-0.583662	11.3418	10.0164	0.00155152	0.244817	Calm1	ENSRNOG00000004060
12487	ENSRNOT00000098678	-0.857053	5.47847	10.0065	0.00155986	0.244817	Arpp19	ENSRNOG00000063103
2053	ENSRNOT00000011756	-1.00023	3.59905	9.95622	0.00160307	0.24711	Ppp1r9a	ENSRNOG00000008869
12088	ENSRNOT00000096938	-1.17865	3.01763	9.97142	0.00158989	0.24711	Vamp8	ENSRNOG00000012748
5237	ENSRNOT00000027760	0.884625	5.20882	9.90083	0.00165204	0.252464	Cd81	ENSRNOG00000020451
2630	ENSRNOT00000014807	-1.06939	4.14884	9.77574	0.00176829	0.266803	Igfbp6	ENSRNOG00000010977
4804	ENSRNOT00000025949	-1.11143	3.28435	9.71254	0.00183015	0.266803	Clec11a	ENSRNOG00000019138
7295	ENSRNOT00000052393	-1.28273	1.01243	9.73774	0.00180523	0.266803	Chmp4bl1	ENSRNOG00000034071
7576	ENSRNOT00000057902	1.48345	3.06066	9.76346	0.00178015	0.266803	Sbno1	ENSRNOG00000001064
14478	ENSRNOT00000106817	-0.988476	4.18737	9.70649	0.00183618	0.266803	Max	ENSRNOG00000008049
17429	ENSRNOT00000119111	1.52797	3.0034	9.71335	0.00182935	0.266803	Ptpn13	ENSRNOG00000002061
4654	ENSRNOT00000025279	-0.891992	5.41321	9.6536	0.00188981	0.271616	Mobp	ENSRNOG00000018700
11996	ENSRNOT00000096619	-1.78558	1.54539	9.64377	0.00189995	0.271616	Vezf1	ENSRNOG00000009819
13103	ENSRNOT00000101069	-0.837357	4.79985	9.6219	0.00192271	0.271728	Bcas1	ENSRNOG00000012906
13129	ENSRNOT00000101188	-0.914918	4.56097	9.61362	0.00193139	0.271728	Cox5a	ENSRNOG00000018816
15534	ENSRNOT00000111149	-1.60522	2.70655	9.58495	0.00196179	0.273831	Mrpl35	ENSRNOG00000008546
188	ENSRNOT00000001133	-0.710874	6.47295	9.53065	0.00202069	0.279849	Prrc2a	ENSRNOG00000000852
16675	ENSRNOT00000115893	1.20888	1.11818	9.51493	0.00203806	0.280068	Mindy1	ENSRNOG00000021131
9378	ENSRNOT00000078953	-1.53341	1.86004	9.43526	0.00212853	0.290249	Cog5	ENSRNOG00000056610
2768	ENSRNOT00000015495	-1.07621	2.78037	9.36986	0.00220582	0.296228	Slk	ENSRNOG00000011339
13394	ENSRNOT00000102429	-0.707371	6.18782	9.37952	0.00219423	0.296228	Sbno1	ENSRNOG00000001064
17071	ENSRNOT00000117627	1.23344	1.28975	9.35605	0.00222251	0.296228	Diras3	ENSRNOG00000068695
8179	ENSRNOT00000066777	0.911207	3.82146	9.30616	0.00228385	0.302133	Ehmt1	ENSRNOG00000007242
1593	ENSRNOT00000009155	-0.985861	3.3002	9.25996	0.00234219	0.303475	Sarnp	ENSRNOG00000030520
12260	ENSRNOT00000097724	-0.777985	4.79162	9.25781	0.00234493	0.303475	Srp19	ENSRNOG00000020204
13412	ENSRNOT00000102519	1.28356	1.77682	9.25748	0.00234535	0.303475	Aldh6a1	ENSRNOG00000011419
17712	ENSRNOT00000120273	1.53307	1.60373	9.24303	0.00236394	0.303664	Atp9a	ENSRNOG00000049484
12976	ENSRNOT00000100544	1.34998	1.57125	9.22325	0.00238962	0.304753	Akt2	ENSRNOG00000018677
15633	ENSRNOT00000111547	0.656607	7.28033	9.20667	0.00241135	0.305329	Tcf25	ENSRNOG00000017023
14204	ENSRNOT00000105695	1.98406	4.41094	9.18316	0.00244252	0.307082	Ube2k	ENSRNOG00000027088
13270	ENSRNOT00000101887	-1.04664	4.04721	9.09682	0.00256055	0.319654	Msl1	ENSRNOG00000009643
2174	ENSRNOT00000012381	-1.18967	0.864509	9.03431	0.00264959	0.32452	Rec114	ENSRNOG00000009332
6408	ENSRNOT00000039663	-0.928236	5.15859	9.04761	0.00263039	0.32452	Ubr4	ENSRNOG00000018183
11088	ENSRNOT00000091680	-2.01613	4.96504	9.0184	0.00267276	0.32452	Ppp1ca	ENSRNOG00000018708
12816	ENSRNOT00000099934	-0.699146	5.53677	9.02293	0.00266614	0.32452	Bod1l1	ENSRNOG00000050437
5492	ENSRNOT00000028818	1.12714	2.17798	8.91914	0.00282197	0.340307	Cpxm1	ENSRNOG00000021220
11401	ENSRNOT00000094133	1.24998	3.30835	8.90513	0.0028437	0.34061	Ramp3	ENSRNOG00000053766
13	ENSRNOT00000000072	-1.1991	3.00562	8.85795	0.00291816	0.344868	Atp5me	ENSRNOG00000000064
16053	ENSRNOT00000113291	-1.33422	1.98198	8.86944	0.00289984	0.344868	Med15	ENSRNOG00000001877
17375	ENSRNOT00000118847	-0.739919	4.76667	8.81987	0.00297968	0.349807	Ap2s1	ENSRNOG00000015865
8449	ENSRNOT00000071028	-0.868383	4.25322	8.73493	0.00312171	0.36407	AC109542.1	ENSRNOG00000048562
11048	ENSRNOT00000091346	1.27453	3.14753	8.70485	0.00317364	0.367707	Trrap	ENSRNOG00000025244
1502	ENSRNOT00000008655	1.2534	2.08608	8.68177	0.00321409	0.369975	Lrrn3	ENSRNOG00000006368
3368	ENSRNOT00000018616	-1.31622	4.85649	8.65849	0.00325541	0.372313	Fam193a	ENSRNOG00000013832
3587	ENSRNOT00000019740	1.59564	3.10942	8.61395	0.00333597	0.379082	Trappc2l	ENSRNOG00000014581
4193	ENSRNOT00000022976	-2.0218	2.57153	8.57915	0.00340034	0.381505	Hmg20a	ENSRNOG00000016905
17223	ENSRNOT00000118221	-1.75727	2.9093	8.58733	0.0033851	0.381505	Ythdc1	ENSRNOG00000001996
969	ENSRNOT00000005502	-1.11999	1.86089	8.54557	0.00346364	0.383511	RGD1311745	ENSRNOG00000004135
11450	ENSRNOT00000094376	-1.35747	1.07915	8.5397	0.00347483	0.383511	NA	ENSRNOG00000066491
17143	ENSRNOT00000117927	-1.18924	1.17531	8.53536	0.00348312	0.383511	Snx10	ENSRNOG00000011944
16668	ENSRNOT00000115873	-1.39209	1.63382	8.51546	0.00352142	0.385334	Arid4a	ENSRNOG00000026239
1403	ENSRNOT00000007876	0.938411	3.49106	8.47928	0.00359215	0.390663	AC136661.1	ENSRNOG00000037380
4444	ENSRNOT00000024264	-0.895643	4.73066	8.41583	0.00371969	0.402066	Nars1	ENSRNOG00000017852
11392	ENSRNOT00000094114	1.32306	5.38707	8.33134	0.00389668	0.418646	Zc3h15	ENSRNOG00000005256
12105	ENSRNOT00000097001	-1.79774	1.78307	8.25048	0.00407411	0.435071	Gse1	ENSRNOG00000017489
1714	ENSRNOT00000009894	-0.750147	4.50931	8.22689	0.00412742	0.438125	Nfkbia	ENSRNOG00000007390
13198	ENSRNOT00000101518	-0.917774	3.2134	8.20441	0.00417887	0.440945	Ints11	ENSRNOG00000019712
16177	ENSRNOT00000113840	-0.740047	4.44716	8.18672	0.00421983	0.442632	Polr3k	ENSRNOG00000017843
2351	ENSRNOT00000013342	-0.867811	4.41757	8.16151	0.00427887	0.446185	Spry2	ENSRNOG00000010058
16088	ENSRNOT00000113459	1.82398	1.77465	8.14646	0.00431454	0.447274	Rusf1	ENSRNOG00000020144
125	ENSRNOT00000000700	-0.660492	5.34002	8.13522	0.00434136	0.447438	AC096404.1	ENSRNOG00000000574
3185	ENSRNOT00000017613	-0.882342	5.70755	8.11247	0.00439619	0.447881	Ankrd12	ENSRNOG00000012733
12606	ENSRNOT00000099149	-1.13827	3.82178	8.11679	0.00438572	0.447881	Zrsr2-ps1	ENSRNOG00000009639
16973	ENSRNOT00000117216	-0.671237	5.70811	8.08159	0.00447172	0.452972	Atp5mc3	ENSRNOG00000001596
14577	ENSRNOT00000107199	-0.657305	7.61925	8.0694	0.0045019	0.453438	Cox4i1	ENSRNOG00000017817
5777	ENSRNOT00000031901	1.13094	3.24361	8.00537	0.00466389	0.466114	Smurf1	ENSRNOG00000000999
8680	ENSRNOT00000073099	1.27242	0.993604	7.9878	0.00470937	0.466114	Cyp3a9	ENSRNOG00000046643
11850	ENSRNOT00000096027	-1.2612	3.19895	7.97238	0.00474965	0.466114	Mff	ENSRNOG00000015428
12862	ENSRNOT00000100130	-0.87225	4.27842	7.98683	0.00471189	0.466114	Ssb	ENSRNOG00000007998
13766	ENSRNOT00000103913	-0.805456	4.32129	7.96874	0.00475921	0.466114	Gng2	ENSRNOG00000048980
15265	ENSRNOT00000110092	-1.36536	2.53737	7.94771	0.00481481	0.468968	Dnal1	ENSRNOG00000042333
4024	ENSRNOT00000022126	1.21666	3.74038	7.91873	0.00489255	0.473155	Acsl5	ENSRNOG00000016265
14104	ENSRNOT00000105262	-0.929513	3.9743	7.91186	0.00491118	0.473155	Ppp3ca	ENSRNOG00000009882
11769	ENSRNOT00000095749	-0.659644	5.3776	7.83526	0.00512367	0.490959	Smap1	ENSRNOG00000049127
16255	ENSRNOT00000114114	-0.837878	3.92666	7.80631	0.00520642	0.496206	Rps28-ps1	ENSRNOG00000049442
11982	ENSRNOT00000096562	-0.827108	3.9805	7.78396	0.00527122	0.499695	Arpc5l	ENSRNOG00000014317
16678	ENSRNOT00000115899	1.20768	4.58467	7.76494	0.00532699	0.502296	Magi2	ENSRNOG00000013962
7327	ENSRNOT00000054952	0.832472	4.79085	7.74804	0.00537709	0.504337	Pcyt2	ENSRNOG00000036684
4874	ENSRNOT00000026258	-1.45597	3.46201	7.72234	0.00545417	0.50722	Tef	ENSRNOG00000019383
14707	ENSRNOT00000107760	-0.800628	3.53856	7.70931	0.00549366	0.50722	Efcab14	ENSRNOG00000010091
14833	ENSRNOT00000108349	-0.800932	3.67816	7.71271	0.00548334	0.50722	Banp	ENSRNOG00000019140
16512	ENSRNOT00000115252	-1.19179	6.27128	7.692	0.0055466	0.509454	Rnf14	ENSRNOG00000045637
14434	ENSRNOT00000106614	-0.836877	3.95574	7.66629	0.0056262	0.514101	Prnp	ENSRNOG00000021259
2082	ENSRNOT00000011915	1.3502	2.88024	7.59996	0.00583697	0.527758	Slc37a3	ENSRNOG00000008725
14616	ENSRNOT00000107359	-0.91348	3.37795	7.59133	0.00586497	0.527758	Chd4	ENSRNOG00000018309
17043	ENSRNOT00000117493	1.2505	1.79522	7.60478	0.00582138	0.527758	Cdk18	ENSRNOG00000008137
6471	ENSRNOT00000040540	-0.607764	6.63053	7.55866	0.00597223	0.534696	Ndrg2	ENSRNOG00000010389
8094	ENSRNOT00000065997	1.16137	3.31851	7.53186	0.00606174	0.539982	Rabggtb	ENSRNOG00000009992
5910	ENSRNOT00000033726	-0.788818	4.35266	7.51358	0.00612354	0.542027	Cs	ENSRNOG00000023520
13620	ENSRNOT00000103414	1.37054	4.05629	7.50704	0.00614584	0.542027	Hprt1	ENSRNOG00000031367
15337	ENSRNOT00000110414	-0.840743	4.01971	7.47744	0.00624769	0.548282	Larp1b	ENSRNOG00000038366
14557	ENSRNOT00000107131	-1.30395	1.85699	7.45685	0.00631957	0.551857	Zfp385a	ENSRNOG00000036833
4601	ENSRNOT00000024980	-1.36592	2.22199	7.42448	0.00643423	0.556279	Scamp4	ENSRNOG00000018271
15784	ENSRNOT00000112147	1.08031	1.39091	7.41608	0.00646435	0.556279	Ppp1r12a	ENSRNOG00000004925
16760	ENSRNOT00000116313	1.98742	2.18891	7.42788	0.00642209	0.556279	RGD1564409	ENSRNOG00000057162
14748	ENSRNOT00000107992	-1.27056	3.53025	7.39938	0.00652465	0.558756	Kat6b	ENSRNOG00000012850
3107	ENSRNOT00000017269	-1.54948	1.70004	7.38737	0.00656835	0.559794	Tk2	ENSRNOG00000012853
4656	ENSRNOT00000025282	0.760085	6.79127	7.37411	0.00661697	0.561239	Ppp1ca	ENSRNOG00000018708
1636	ENSRNOT00000009398	0.784618	4.1969	7.33793	0.00675144	0.568468	Timm17a	ENSRNOG00000007040
12540	ENSRNOT00000098876	-0.811168	3.58674	7.33397	0.00676633	0.568468	Klf13	ENSRNOG00000015822
9394	ENSRNOT00000079015	-0.588313	7.60617	7.31818	0.00682606	0.570781	Ppia	ENSRNOG00000027864
2806	ENSRNOT00000015692	1.1511	1.45988	7.2923	0.00692509	0.570982	Aqp1	ENSRNOG00000011648
3843	ENSRNOT00000021081	-1.02383	0.516695	7.2942	0.00691776	0.570982	Ghr	ENSRNOG00000015654
5210	ENSRNOT00000027639	0.866491	3.60366	7.30477	0.00687718	0.570982	Tmem161a	ENSRNOG00000020390
1465	ENSRNOT00000008303	-0.930515	3.2667	7.26416	0.00703441	0.576762	Wiz	ENSRNOG00000006217
16685	ENSRNOT00000115921	-1.06237	3.35633	7.25757	0.00706026	0.576762	Prdx3	ENSRNOG00000010958
451	ENSRNOT00000002450	-1.25592	2.00134	7.21756	0.00721938	0.577298	Umps	ENSRNOG00000001797
4932	ENSRNOT00000026466	-1.60578	3.26041	7.20694	0.00726223	0.577298	Kat8	ENSRNOG00000019485
9121	ENSRNOT00000076978	0.90398	5.91444	7.22841	0.00717586	0.577298	Rps4x	ENSRNOG00000003201
12974	ENSRNOT00000100536	-0.848535	3.25943	7.23313	0.00715702	0.577298	Nat9	ENSRNOG00000003264
17335	ENSRNOT00000118700	-1.25392	1.45545	7.2095	0.00725187	0.577298	Glul	ENSRNOG00000049560
17581	ENSRNOT00000119742	-0.629763	5.46482	7.2135	0.00723571	0.577298	Osbpl1a	ENSRNOG00000054058
16477	ENSRNOT00000115092	-1.32456	3.14672	7.17698	0.00738449	0.583699	Prelid3b	ENSRNOG00000046644
16917	ENSRNOT00000116953	1.23642	1.65764	7.17113	0.00740861	0.583699	Fam149b1	ENSRNOG00000006554
6914	ENSRNOT00000046791	-0.608939	7.33826	7.09824	0.00771595	0.599915	LOC108348870	ENSRNOG00000029410
7572	ENSRNOT00000057879	-1.10503	0.759433	7.10561	0.0076843	0.599915	Akt3	ENSRNOG00000021497
17725	ENSRNOT00000120316	1.07423	3.90528	7.11302	0.00765259	0.599915	Wnk1	ENSRNOG00000009956
3571	ENSRNOT00000019656	-1.1381	1.40934	7.05702	0.00789554	0.600728	Cbfb	ENSRNOG00000014647
6672	ENSRNOT00000043535	0.572887	5.45902	7.07149	0.00783203	0.600728	Ankrd34a	ENSRNOG00000033741
11336	ENSRNOT00000093857	-1.30686	2.57284	7.0785	0.00780143	0.600728	Atp6v1d	ENSRNOG00000009080
11624	ENSRNOT00000095156	-1.22956	3.82401	7.08723	0.0077635	0.600728	Ahi1	ENSRNOG00000013969
14165	ENSRNOT00000105517	-1.03446	3.08472	7.05695	0.00789585	0.600728	Arid5b	ENSRNOG00000000635
9466	ENSRNOT00000079511	-1.06221	2.14025	7.0427	0.00795891	0.602939	Rtkn	ENSRNOG00000009022
13498	ENSRNOT00000102882	-0.805491	3.5179	7.00855	0.00811211	0.61193	Akap9	ENSRNOG00000026319
12933	ENSRNOT00000100387	-1.37851	2.48743	6.99934	0.00815399	0.612482	Tmem161a	ENSRNOG00000020390
9342	ENSRNOT00000078643	-0.722394	4.49516	6.98987	0.00819725	0.613133	Arid4b	ENSRNOG00000016391
4402	ENSRNOT00000024083	-0.719927	4.42528	6.96037	0.0083335	0.620706	Etfb	ENSRNOG00000017851
15103	ENSRNOT00000109430	-0.754326	3.76096	6.94431	0.00840864	0.623682	Stradb	ENSRNOG00000010728
15098	ENSRNOT00000109405	0.68843	7.34682	6.92861	0.00848275	0.626557	Stmn3	ENSRNOG00000013657
362	ENSRNOT00000001918	-0.740661	4.23939	6.91831	0.00853175	0.627289	Ap1s1	ENSRNOG00000001415
4677	ENSRNOT00000025380	-1.07875	5.28594	6.90888	0.00857688	0.627289	Rps28-ps1	ENSRNOG00000049442
5480	ENSRNOT00000028759	1.18955	1.36067	6.90431	0.00859882	0.627289	Naa40	ENSRNOG00000021179
1422	ENSRNOT00000007998	-1.35129	5.97474	6.88168	0.00870838	0.627535	Snap25	ENSRNOG00000006037
2861	ENSRNOT00000015986	1.19976	1.64987	6.88962	0.00866975	0.627535	LOC108348048	ENSRNOG00000000195
7863	ENSRNOT00000063994	-0.576237	5.49156	6.88213	0.00870619	0.627535	Srpk2	ENSRNOG00000010601
3247	ENSRNOT00000017947	1.15776	2.49172	6.84267	0.00890058	0.638788	Arhgef7	ENSRNOG00000012934
1001	ENSRNOT00000005641	-0.628262	5.73203	6.81655	0.00903169	0.645533	Pdk2	ENSRNOG00000004172
3401	ENSRNOT00000018820	0.688967	6.25402	6.80161	0.00910756	0.645533	Rplp1	ENSRNOG00000013874
3627	ENSRNOT00000019968	0.822386	3.65131	6.79096	0.00916204	0.645533	Epc1	ENSRNOG00000014834
8408	ENSRNOT00000068694	0.789091	4.08006	6.7773	0.00923243	0.645533	AABR07001902.1	ENSRNOG00000042547
8688	ENSRNOT00000073186	0.887361	3.56507	6.77401	0.00924947	0.645533	Arl10	ENSRNOG00000045948
13071	ENSRNOT00000100938	0.771915	6.06296	6.79768	0.00912763	0.645533	Pdap1	ENSRNOG00000000990
17719	ENSRNOT00000120308	1.34432	2.25289	6.77591	0.00923964	0.645533	Stard10	ENSRNOG00000019491
16112	ENSRNOT00000113541	0.778264	3.46538	6.75948	0.00932509	0.648258	Trpm4	ENSRNOG00000020714
808	ENSRNOT00000004641	0.87633	2.94927	6.74905	0.00937975	0.649511	Tomm40l	ENSRNOG00000003398
11762	ENSRNOT00000095713	-1.08795	3.13247	6.73728	0.00944187	0.650349	Prpf40a	ENSRNOG00000004864
16247	ENSRNOT00000114089	-1.12193	1.61846	6.73287	0.00946523	0.650349	Tesc	ENSRNOG00000001128
9870	ENSRNOT00000082600	-0.9309	2.44945	6.72118	0.00952746	0.652097	Ppp1r13b	ENSRNOG00000012653
2540	ENSRNOT00000014300	0.7171	6.02953	6.71264	0.00957322	0.652709	Mbnl2	ENSRNOG00000010737
13962	ENSRNOT00000104748	-0.776958	4.02913	6.69629	0.00966138	0.653692	Rpl30	ENSRNOG00000068679
14550	ENSRNOT00000107109	0.713723	4.49411	6.69773	0.00965358	0.653692	Sh3glb2	ENSRNOG00000017295
17127	ENSRNOT00000117837	-1.20266	1.41032	6.6608	0.00985568	0.664303	Mrpl21	ENSRNOG00000013845
15981	ENSRNOT00000113002	-0.924423	5.88916	6.6482	0.00992559	0.666481	NA	ENSRNOG00000071119
4457	ENSRNOT00000024310	-1.24121	3.31415	6.60059	0.0101945	0.667722	Ahcy	ENSRNOG00000017777
6045	ENSRNOT00000035385	1.15734	0.361336	6.603	0.0101807	0.667722	Dok7	ENSRNOG00000022419
9185	ENSRNOT00000077435	1.20172	1.91462	6.60962	0.0101429	0.667722	Mia2	ENSRNOG00000005101
10750	ENSRNOT00000089149	-1.21008	2.90115	6.59172	0.0102454	0.667722	Qki	ENSRNOG00000048297
11675	ENSRNOT00000095372	-0.787597	3.70913	6.59596	0.010221	0.667722	NA	ENSRNOG00000063675
13294	ENSRNOT00000102002	1.04047	0.713061	6.6188	0.0100908	0.667722	Mecom	ENSRNOG00000012645
14832	ENSRNOT00000108340	0.99781	2.91035	6.59825	0.0102079	0.667722	Actg1	ENSRNOG00000036701
15607	ENSRNOT00000111452	-1.45403	1.91226	6.63023	0.0100262	0.667722	Btaf1	ENSRNOG00000017938
17228	ENSRNOT00000118244	-1.01809	1.05835	6.5631	0.0104115	0.676058	Abhd17b	ENSRNOG00000012514
12809	ENSRNOT00000099903	0.552708	7.39625	6.54583	0.010513	0.677688	Sptbn2	ENSRNOG00000058842
15780	ENSRNOT00000112122	-0.834678	3.96212	6.54724	0.0105047	0.677688	Erf	ENSRNOG00000020426
1384	ENSRNOT00000007766	1.02676	1.0168	6.52241	0.0106524	0.681714	Arfgef1	ENSRNOG00000005703
13827	ENSRNOT00000104192	-0.840244	3.3512	6.52516	0.0106359	0.681714	Nedd8	ENSRNOG00000019895
12209	ENSRNOT00000097479	0.698462	6.45651	6.50757	0.0107416	0.684952	Ldha	ENSRNOG00000013009
13910	ENSRNOT00000104573	0.620425	4.95526	6.49576	0.0108132	0.687046	App	ENSRNOG00000006997
10366	ENSRNOT00000086272	-1.40367	1.52938	6.46687	0.0109904	0.689159	Ndufv3	ENSRNOG00000001182
12777	ENSRNOT00000099774	-1.12513	1.06562	6.46627	0.0109941	0.689159	Crip1	ENSRNOG00000027990
13396	ENSRNOT00000102436	0.996558	2.19795	6.465	0.011002	0.689159	Bnip2	ENSRNOG00000056024
17265	ENSRNOT00000118400	1.00068	1.20833	6.48326	0.0108895	0.689159	Rgcc	ENSRNOG00000042960
13519	ENSRNOT00000102987	-0.571275	6.24983	6.43921	0.0111628	0.696771	Hmgb1-ps4	ENSRNOG00000065098
2781	ENSRNOT00000015570	1.0233	3.91512	6.41757	0.0112997	0.697941	Clstn3	ENSRNOG00000011156
12101	ENSRNOT00000096987	-0.954104	1.9376	6.42304	0.0112649	0.697941	Aldh5a1	ENSRNOG00000023538
12966	ENSRNOT00000100505	0.583439	5.51642	6.42752	0.0112365	0.697941	Srcap	ENSRNOG00000050282
3069	ENSRNOT00000017086	-1.10607	1.99276	6.36577	0.0116342	0.713193	Sugt1	ENSRNOG00000012594
12403	ENSRNOT00000098338	0.928371	3.24813	6.37083	0.0116011	0.713193	NA	ENSRNOG00000067218
16089	ENSRNOT00000113469	-1.02955	3.2976	6.36074	0.0116673	0.713193	Adgrl1	ENSRNOG00000029134
14486	ENSRNOT00000106843	1.04134	5.0518	6.32316	0.0119171	0.725962	Tp53bp1	ENSRNOG00000013837
5562	ENSRNOT00000029503	-0.813833	3.78827	6.30516	0.0120387	0.728512	Xkr4	ENSRNOG00000027276
15685	ENSRNOT00000111729	1.00551	0.801001	6.30479	0.0120412	0.728512	Ceacam1	ENSRNOG00000020578
5791	ENSRNOT00000032106	0.990349	2.24354	6.29304	0.0121213	0.730866	Adamtsl3	ENSRNOG00000010840
17341	ENSRNOT00000118719	-0.874199	2.87647	6.28261	0.0121929	0.732688	Tceal8	ENSRNOG00000028585
13635	ENSRNOT00000103450	0.945508	0.988831	6.25788	0.0123642	0.735505	Porcn	ENSRNOG00000004819
15145	ENSRNOT00000109621	-1.06607	5.89461	6.25894	0.0123568	0.735505	Cacnb1	ENSRNOG00000004518
16166	ENSRNOT00000113793	-0.956049	4.86033	6.26301	0.0123285	0.735505	Iqsec1	ENSRNOG00000060350
4170	ENSRNOT00000022865	-0.822249	3.72193	6.25164	0.0124078	0.735629	Sfmbt1	ENSRNOG00000016645
7524	ENSRNOT00000057199	-0.544315	6.67878	6.22437	0.0126004	0.738224	Ogdh	ENSRNOG00000005130
10111	ENSRNOT00000084437	-0.839037	3.44523	6.22188	0.0126181	0.738224	Snap91	ENSRNOG00000023861
15481	ENSRNOT00000110933	-0.81378	4.83531	6.22981	0.0125617	0.738224	Gpatch8	ENSRNOG00000021044
17269	ENSRNOT00000118414	0.881974	3.2308	6.22869	0.0125697	0.738224	Pam	ENSRNOG00000033280
10646	ENSRNOT00000088378	-0.605961	5.0466	6.19264	0.0128283	0.745596	Arhgap5	ENSRNOG00000004696
14843	ENSRNOT00000108372	-1.31598	3.43062	6.19598	0.012804	0.745596	Ywhae	ENSRNOG00000005290
14295	ENSRNOT00000106057	1.05363	0.156161	6.18559	0.0128795	0.746127	Trim5	ENSRNOG00000017191
12898	ENSRNOT00000100279	1.52674	4.76186	6.16565	0.0130254	0.752124	Golga2	ENSRNOG00000011884
4543	ENSRNOT00000024712	-0.682824	5.60293	6.15301	0.0131189	0.75506	Ncl	ENSRNOG00000018273
15995	ENSRNOT00000113065	-1.20903	4.0919	6.13167	0.0132781	0.761751	Snap91	ENSRNOG00000023861
6724	ENSRNOT00000044257	-0.631973	5.31909	6.11931	0.0133713	0.764622	Shank1	ENSRNOG00000019207
1059	ENSRNOT00000005899	-1.04688	0.754708	6.09322	0.0135701	0.766935	Flywch2	ENSRNOG00000004461
9264	ENSRNOT00000078044	-1.06386	4.46917	6.08735	0.0136153	0.766935	Map4k3	ENSRNOG00000007172
9974	ENSRNOT00000083408	-1.33458	2.40423	6.08208	0.013656	0.766935	Gkap1	ENSRNOG00000019272
15208	ENSRNOT00000109881	0.99991	3.06084	6.09532	0.013554	0.766935	Ndor1	ENSRNOG00000010616
15565	ENSRNOT00000111266	0.829262	3.23807	6.09459	0.0135597	0.766935	Dcp1a	ENSRNOG00000016015
16666	ENSRNOT00000115869	-0.656789	4.20278	6.0801	0.0136713	0.766935	Ftl1	ENSRNOG00000064385
7320	ENSRNOT00000054925	-1.24539	1.17763	6.06275	0.0138063	0.769634	Ogfod3	ENSRNOG00000036668
17130	ENSRNOT00000117864	-0.8689	2.55533	6.06405	0.0137961	0.769634	Slc25a17	ENSRNOG00000018920
3119	ENSRNOT00000017322	-0.648562	4.83437	6.04695	0.0139303	0.774115	Epb41l2	ENSRNOG00000012346
874	ENSRNOT00000005016	-0.699761	6.10031	6.02508	0.014104	0.781317	Prpf8	ENSRNOG00000003495
9815	ENSRNOT00000082216	-0.796688	5.51468	6.00014	0.0143047	0.782655	Begain	ENSRNOG00000004650
10063	ENSRNOT00000084024	-0.953984	0.383492	6.012	0.0142089	0.782655	AABR07019088.1	ENSRNOG00000057291
11801	ENSRNOT00000095852	-0.979294	2.08805	6.00639	0.0142541	0.782655	Erc2	ENSRNOG00000015148
16188	ENSRNOT00000113891	0.70739	4.87482	6.00396	0.0142738	0.782655	Emc10	ENSRNOG00000019532
6642	ENSRNOT00000042973	0.926793	0.748848	5.97971	0.0144714	0.789335	Tnfaip2	ENSRNOG00000010165
10666	ENSRNOT00000088557	0.984798	1.3515	5.96437	0.0145979	0.793792	Nat8b	ENSRNOG00000056962
2774	ENSRNOT00000015540	-0.911843	2.57313	5.92656	0.0149143	0.808519	Xkr6	ENSRNOG00000011634
15718	ENSRNOT00000111864	0.569515	4.97124	5.88803	0.0152441	0.823879	Fam117b	ENSRNOG00000022066
9259	ENSRNOT00000078013	-0.971422	3.58089	5.86555	0.01544	0.83193	Esd	ENSRNOG00000009512
15002	ENSRNOT00000109007	-1.1942	1.14436	5.85431	0.0155389	0.834723	Snw1	ENSRNOG00000037998
3153	ENSRNOT00000017448	-0.703912	5.91876	5.84272	0.0156416	0.837699	Map9	ENSRNOG00000012982
16719	ENSRNOT00000116066	-0.962922	2.54313	5.83729	0.0156899	0.837758	Atp5f1c	ENSRNOG00000019223
2440	ENSRNOT00000013762	-0.613372	5.75995	5.80058	0.0160209	0.842739	Palm	ENSRNOG00000009760
3487	ENSRNOT00000019213	0.836356	3.13876	5.81183	0.0159187	0.842739	Jag2	ENSRNOG00000013927
3952	ENSRNOT00000021725	-0.544372	6.26659	5.80362	0.0159932	0.842739	Rpl12	ENSRNOG00000016220
13445	ENSRNOT00000102674	-0.854682	3.21345	5.80365	0.015993	0.842739	Fxyd1	ENSRNOG00000021079
14058	ENSRNOT00000105106	-0.673994	7.46654	5.80776	0.0159556	0.842739	Rpl37	ENSRNOG00000064545
6865	ENSRNOT00000046142	0.929775	2.33329	5.7357	0.0166234	0.862949	Rsbn1l	ENSRNOG00000013431
9206	ENSRNOT00000077625	-1.06494	1.75	5.74997	0.016489	0.862949	Spop	ENSRNOG00000004686
11872	ENSRNOT00000096106	0.597731	6.22539	5.73305	0.0166485	0.862949	Wsb2	ENSRNOG00000001135
16203	ENSRNOT00000113937	-0.511364	8.28004	5.74706	0.0165163	0.862949	Atp6v0c	ENSRNOG00000006542
16676	ENSRNOT00000115895	0.997231	0.456142	5.73964	0.0165862	0.862949	Rasgef1b	ENSRNOG00000002345
927	ENSRNOT00000005277	-1.01068	1.91901	5.71934	0.016779	0.867177	Tmco1	ENSRNOG00000003928
1773	ENSRNOT00000010180	0.687905	4.89592	5.70181	0.0169474	0.868406	Cd63	ENSRNOG00000007650
6520	ENSRNOT00000041326	-0.648995	5.78211	5.69246	0.017038	0.868406	RGD1559972	ENSRNOG00000031273
9591	ENSRNOT00000080410	-0.76879	7.06384	5.70967	0.0168717	0.868406	Bcat1	ENSRNOG00000015514
11138	ENSRNOT00000092112	-0.961541	0.527734	5.69373	0.0170256	0.868406	Rab13	ENSRNOG00000016733
13984	ENSRNOT00000104814	0.700807	4.24783	5.69145	0.0170477	0.868406	Ap3s1	ENSRNOG00000003829
3491	ENSRNOT00000019245	0.620459	5.97805	5.6857	0.0171037	0.86876	Herc2	ENSRNOG00000013718
16257	ENSRNOT00000114123	-0.861421	3.03733	5.6455	0.0175002	0.886362	Pacc1	ENSRNOG00000003915
1045	ENSRNOT00000005839	-1.34382	4.25271	5.62403	0.0177159	0.894727	Aatk	ENSRNOG00000004392
9807	ENSRNOT00000082172	-1.12182	1.83349	5.6145	0.0178124	0.895235	Mettl6	ENSRNOG00000052391
16050	ENSRNOT00000113283	0.759244	4.62312	5.61308	0.0178269	0.895235	Pes1	ENSRNOG00000004515
1778	ENSRNOT00000010216	-0.562482	6.75389	5.58805	0.0180834	0.897535	Ppig	ENSRNOG00000007673
3979	ENSRNOT00000021865	0.947277	2.27461	5.58394	0.0181259	0.897535	Kyat1	ENSRNOG00000016097
5459	ENSRNOT00000028687	0.593911	5.91962	5.59921	0.0179686	0.897535	Prdx5	ENSRNOG00000021125
6589	ENSRNOT00000042201	-1.05169	4.67697	5.58867	0.0180771	0.897535	Rpl9-ps31	ENSRNOG00000030476
11438	ENSRNOT00000094307	-1.01496	1.38726	5.59243	0.0180383	0.897535	Prrc2c	ENSRNOG00000068743
4055	ENSRNOT00000022290	0.973482	2.54453	5.55238	0.0184556	0.908494	Sned1	ENSRNOG00000023548
10987	ENSRNOT00000090874	-1.04437	0.420987	5.54324	0.0185522	0.908494	Tmem106b	ENSRNOG00000006206
14611	ENSRNOT00000107331	-0.519395	6.41189	5.54501	0.0185334	0.908494	Rimbp2	ENSRNOG00000022893
17564	ENSRNOT00000119681	-1.25061	1.51508	5.54744	0.0185077	0.908494	Nsfl1c	ENSRNOG00000008604
1152	ENSRNOT00000006389	-0.874087	2.26264	5.49233	0.0191001	0.911195	Plcb1	ENSRNOG00000004810
1705	ENSRNOT00000009815	0.547831	5.47374	5.46876	0.0193593	0.911195	Atp5mc1	ENSRNOG00000007235
1735	ENSRNOT00000009989	-0.598365	5.48934	5.46675	0.0193816	0.911195	Mtdh	ENSRNOG00000006870
3283	ENSRNOT00000018114	-0.859813	4.43654	5.46134	0.0194417	0.911195	Ddx41	ENSRNOG00000012771
7028	ENSRNOT00000048598	-1.02834	1.12571	5.45319	0.0195326	0.911195	RGD1564606	ENSRNOG00000029670
8572	ENSRNOT00000072155	-1.06777	2.02556	5.49149	0.0191092	0.911195	Cetn3	ENSRNOG00000050877
8846	ENSRNOT00000074649	-0.623821	4.5172	5.5316	0.018676	0.911195	Ube2h	ENSRNOG00000048205
9397	ENSRNOT00000079044	-0.665418	4.08806	5.45803	0.0194785	0.911195	Xpo6	ENSRNOG00000016722
9576	ENSRNOT00000080285	-0.608572	5.85092	5.50865	0.0189226	0.911195	Ppp1r12a	ENSRNOG00000004925
9735	ENSRNOT00000081574	-1.34255	4.70014	5.50718	0.0189385	0.911195	Septin7	ENSRNOG00000006545
10371	ENSRNOT00000086299	0.959464	0.431456	5.4646	0.0194055	0.911195	Vrk2	ENSRNOG00000007864
10958	ENSRNOT00000090705	0.737492	3.7119	5.47426	0.0192985	0.911195	Pkn2	ENSRNOG00000011317
11137	ENSRNOT00000092099	-1.39656	4.88777	5.47059	0.0193391	0.911195	Spon1	ENSRNOG00000058003
11994	ENSRNOT00000096610	-1.08068	1.35516	5.48521	0.019178	0.911195	Reps1	ENSRNOG00000059224
12383	ENSRNOT00000098248	-0.792292	5.49063	5.50997	0.0189083	0.911195	Meis2	ENSRNOG00000004730
12823	ENSRNOT00000099957	-1.04954	0.505421	5.51729	0.0188294	0.911195	Pxk	ENSRNOG00000008024
13185	ENSRNOT00000101461	1.14202	0.97702	5.46477	0.0194036	0.911195	Cmtr1	ENSRNOG00000000532
13243	ENSRNOT00000101757	0.882602	0.678264	5.45421	0.0195213	0.911195	Ccm2	ENSRNOG00000060825
13517	ENSRNOT00000102977	-0.576999	5.45443	5.42291	0.0198742	0.922278	Hspe1	ENSRNOG00000051624
15349	ENSRNOT00000110440	-0.841603	3.40343	5.42524	0.0198477	0.922278	Tmem230	ENSRNOG00000065411
1834	ENSRNOT00000010545	0.921699	3.45325	5.41058	0.0200151	0.923979	Pdhb	ENSRNOG00000007895
7093	ENSRNOT00000049520	-0.506982	5.84961	5.41474	0.0199674	0.923979	Gm5471	ENSRNOG00000033979
17303	ENSRNOT00000118555	-0.893517	1.9091	5.40068	0.0201289	0.926817	NA	ENSRNOG00000070631
9782	ENSRNOT00000081993	-0.492006	5.63051	5.38671	0.0202907	0.931849	Prpf4b	ENSRNOG00000016705
1898	ENSRNOT00000010884	0.489347	6.25074	5.37437	0.0204347	0.936035	Atp13a2	ENSRNOG00000008052
12855	ENSRNOT00000100108	-1.05248	2.97705	5.35177	0.0207012	0.936152	Baz1b	ENSRNOG00000001453
13085	ENSRNOT00000100994	-0.519039	7.78213	5.36278	0.0205709	0.936152	Rpl19	ENSRNOG00000004741
13671	ENSRNOT00000103578	-0.700913	4.60405	5.3624	0.0205754	0.936152	Pcdh17	ENSRNOG00000008970
14072	ENSRNOT00000105142	0.773548	5.0866	5.35177	0.0207013	0.936152	Bsg	ENSRNOG00000008414
14133	ENSRNOT00000105383	-0.502156	5.48035	5.35606	0.0206503	0.936152	Lsm12	ENSRNOG00000020894
17689	ENSRNOT00000120176	-1.12105	2.37896	5.32916	0.0209715	0.945957	Naa15	ENSRNOG00000012385
879	ENSRNOT00000005046	-1.06734	3.5385	5.31803	0.0211058	0.94906	Gosr2	ENSRNOG00000003506
3029	ENSRNOT00000016881	-0.736455	3.59245	5.27683	0.0216111	0.94906	Sfr1	ENSRNOG00000012641
5061	ENSRNOT00000027026	-0.98095	3.69294	5.28725	0.0214821	0.94906	Pcdhga5	ENSRNOG00000063070
5948	ENSRNOT00000034166	-0.576152	6.31956	5.25822	0.0218433	0.94906	Nnat	ENSRNOG00000024923
9325	ENSRNOT00000078505	-0.965692	3.0937	5.27524	0.0216308	0.94906	Hnrnph1	ENSRNOG00000003399
10585	ENSRNOT00000087977	-0.614726	5.9665	5.28867	0.0214647	0.94906	Atrx	ENSRNOG00000056703
11194	ENSRNOT00000092574	-0.862874	1.9592	5.29192	0.0214246	0.94906	Upf3b	ENSRNOG00000039994
11746	ENSRNOT00000095652	-1.15705	1.12867	5.26406	0.0217702	0.94906	Nsrp1	ENSRNOG00000062400
11956	ENSRNOT00000096470	0.885625	2.85067	5.28123	0.0215565	0.94906	Hnrnpm	ENSRNOG00000007921
13556	ENSRNOT00000103148	-0.970442	2.18453	5.30911	0.0212142	0.94906	Tceal1	ENSRNOG00000002387
13672	ENSRNOT00000103579	-1.02614	1.80031	5.28424	0.0215192	0.94906	Msn	ENSRNOG00000030118
13727	ENSRNOT00000103782	-1.27394	1.86357	5.26153	0.0218019	0.94906	Naa35	ENSRNOG00000018417
14908	ENSRNOT00000108648	-0.837783	2.65101	5.31059	0.0211962	0.94906	Gng10	ENSRNOG00000067358
15128	ENSRNOT00000109539	-0.949622	0.203689	5.27073	0.0216869	0.94906	Nipal3	ENSRNOG00000037165
16552	ENSRNOT00000115389	-0.90803	2.93091	5.29827	0.0213466	0.94906	Lrrc7	ENSRNOG00000011980
9759	ENSRNOT00000081786	0.686054	4.28656	5.24818	0.0219698	0.950994	Btaf1	ENSRNOG00000017938
11573	ENSRNOT00000094931	-0.599235	4.39596	5.24617	0.0219951	0.950994	Crim1	ENSRNOG00000004208
14766	ENSRNOT00000108055	-1.0913	0.619915	5.23889	0.0220874	0.952659	Kdm4b	ENSRNOG00000049221
14260	ENSRNOT00000105908	0.478166	6.14357	5.22252	0.0222962	0.959331	Tfrc	ENSRNOG00000001766
4929	ENSRNOT00000026454	1.10523	1.79743	5.20096	0.0225745	0.96326	Rce1	ENSRNOG00000019468
4955	ENSRNOT00000026559	0.573198	5.19151	5.19146	0.0226981	0.96326	Vegfa	ENSRNOG00000019598
8142	ENSRNOT00000066380	-1.09211	1.73631	5.19028	0.0227135	0.96326	Klf13	ENSRNOG00000015822
12516	ENSRNOT00000098797	-0.610902	5.98772	5.19531	0.0226479	0.96326	Zranb2	ENSRNOG00000009990
15673	ENSRNOT00000111682	-0.594404	5.69313	5.2077	0.022487	0.96326	Atp2b2	ENSRNOG00000030269
17098	ENSRNOT00000117739	0.883793	0.586774	5.20102	0.0225736	0.96326	LOC120099296	ENSRNOG00000070008
6573	ENSRNOT00000042058	-0.883514	1.35093	5.18131	0.0228311	0.965871	Zfp455	ENSRNOG00000031576
9977	ENSRNOT00000083427	0.629268	6.70613	5.17728	0.0228841	0.965871	Rpl14	ENSRNOG00000019007
5234	ENSRNOT00000027752	-0.903335	0.555582	5.16123	0.0230965	0.969406	Nucb2	ENSRNOG00000020456
8881	ENSRNOT00000075076	-1.21413	1.51136	5.16497	0.0230469	0.969406	Pgap3	ENSRNOG00000046143
10331	ENSRNOT00000085975	-0.855681	2.6193	5.15447	0.0231866	0.969406	Zfp62	ENSRNOG00000051756
17568	ENSRNOT00000119698	-0.852616	1.17502	5.15609	0.023165	0.969406	Tsc22d1	ENSRNOG00000001030
5253	ENSRNOT00000027811	0.562137	5.31204	5.13314	0.0234732	0.974448	Sart1	ENSRNOG00000020475
6586	ENSRNOT00000042145	-0.564024	5.22559	5.13174	0.0234922	0.974448	Ntrk2	ENSRNOG00000018839
10265	ENSRNOT00000085576	-0.965112	2.87985	5.12917	0.023527	0.974448	Emb	ENSRNOG00000060329
13714	ENSRNOT00000103731	-0.718806	3.52533	5.13486	0.02345	0.974448	Rsl24d1	ENSRNOG00000052787
3689	ENSRNOT00000020325	0.850206	3.67894	5.11981	0.0236542	0.975158	Aldh7a1	ENSRNOG00000014645
7470	ENSRNOT00000056551	-0.925958	1.64531	5.12252	0.0236174	0.975158	Xaf1	ENSRNOG00000037371
3245	ENSRNOT00000017941	-0.503743	5.77232	5.1003	0.0239217	0.979909	Cmip	ENSRNOG00000013178
6611	ENSRNOT00000042547	-0.853554	2.6287	5.09832	0.023949	0.979909	Btf3-ps1	ENSRNOG00000031864
11187	ENSRNOT00000092535	1.25688	1.9088	5.09531	0.0239906	0.979909	Shank3	ENSRNOG00000052296
15053	ENSRNOT00000109255	-0.746364	3.23004	5.10357	0.0238767	0.979909	Rabep1	ENSRNOG00000005015
7897	ENSRNOT00000064282	0.586842	4.31362	5.08233	0.0241709	0.985007	Pamr1	ENSRNOG00000005348
3166	ENSRNOT00000017494	-1.33418	5.64649	5.05716	0.0245244	0.987335	Ndrg4	ENSRNOG00000012482
11092	ENSRNOT00000091698	0.559556	4.53055	5.0623	0.0244518	0.987335	Rsl24d1	ENSRNOG00000052787
11709	ENSRNOT00000095504	-0.903227	1.85461	5.05449	0.0245622	0.987335	Rwdd1	ENSRNOG00000042916
13228	ENSRNOT00000101692	-1.02767	1.49628	5.0547	0.0245592	0.987335	Pfkfb2	ENSRNOG00000004162
15983	ENSRNOT00000113013	-0.673861	3.79516	5.06539	0.0244083	0.987335	Paxx	ENSRNOG00000015294
17040	ENSRNOT00000117481	-1.14325	4.85627	5.06729	0.0243815	0.987335	Ptpn11	ENSRNOG00000030124
6870	ENSRNOT00000046183	0.892276	2.5118	5.04943	0.024634	0.987696	Trmt2a	ENSRNOG00000001885
11929	ENSRNOT00000096333	-0.744504	4.16956	5.04601	0.0246827	0.987696	S100b	ENSRNOG00000001295
2937	ENSRNOT00000016341	-1.28317	4.3296	5.03255	0.0248752	0.99056	Golga2	ENSRNOG00000011884
6114	ENSRNOT00000036172	-0.625116	4.61217	5.0246	0.0249897	0.99056	Hnrnpm	ENSRNOG00000007921
7063	ENSRNOT00000049028	1.00248	3.7775	5.03662	0.0248168	0.99056	LOC100360843	ENSRNOG00000033146
7274	ENSRNOT00000052063	-0.850242	2.51222	5.01631	0.0251096	0.99056	Thsd7a	ENSRNOG00000030151
14114	ENSRNOT00000105294	-0.536775	7.29558	5.01597	0.0251146	0.99056	Tcf25	ENSRNOG00000017023
14629	ENSRNOT00000107400	-0.907722	2.05674	5.01548	0.0251216	0.99056	Dynlt1	ENSRNOG00000018207
16971	ENSRNOT00000117200	0.898538	1.16171	5.01385	0.0251454	0.99056	Smurf2	ENSRNOG00000014623
5641	ENSRNOT00000030324	-0.817812	2.99094	5.00869	0.0252205	0.991315	Tmem134	ENSRNOG00000022153
3895	ENSRNOT00000021445	0.709037	3.63021	5.00213	0.0253161	0.992474	Abtb1	ENSRNOG00000015762
12880	ENSRNOT00000100209	0.890705	3.90432	4.999	0.0253619	0.992474	Arpp21	ENSRNOG00000008919
13108	ENSRNOT00000101096	-0.872135	1.85532	4.99485	0.0254228	0.992665	Hsf1	ENSRNOG00000021732
7551	ENSRNOT00000057585	-1.24552	2.56491	4.98385	0.0255851	0.993931	Fn1	ENSRNOG00000014288
13380	ENSRNOT00000102376	0.993353	3.14045	4.98139	0.0256214	0.993931	Synpo	ENSRNOG00000019181
17473	ENSRNOT00000119286	1.34949	1.95015	4.98125	0.0256234	0.993931	Aurkc	ENSRNOG00000015825
1	ENSRNOT00000000008	-0.119927	3.87694	0.0891775	0.765225	0.999516	Gad1	ENSRNOG00000000007
2	ENSRNOT00000000011	-0.238972	2.26112	0.444594	0.504913	0.999516	Cbln1	ENSRNOG00000000010
3	ENSRNOT00000000013	-0.0752658	1.45945	0.0387414	0.843962	0.999516	Tcf15	ENSRNOG00000000012
4	ENSRNOT00000000025	-0.0751249	4.85162	0.094608	0.758399	0.999516	Hebp1	ENSRNOG00000000024
5	ENSRNOT00000000036	-0.0930585	5.13777	0.0927594	0.760698	0.999516	Tmcc2	ENSRNOG00000000033
6	ENSRNOT00000000039	0.210951	0.951832	0.287541	0.5918	0.999516	Nuak2	ENSRNOG00000000034
7	ENSRNOT00000000041	0.324818	3.86176	1.2731	0.259185	0.999516	Klhdc8a	ENSRNOG00000000036
8	ENSRNOT00000000048	0.188696	4.64706	0.343698	0.557703	0.999516	Idua	ENSRNOG00000000043
9	ENSRNOT00000000050	-0.0923603	5.16168	0.166476	0.683263	0.999516	Tmem175	ENSRNOG00000000044
10	ENSRNOT00000000052	0.269795	3.12279	0.602197	0.437741	0.999516	Cd82	ENSRNOG00000000047
11	ENSRNOT00000000060	-0.534209	5.81618	4.36952	0.0365874	0.999516	Abhd8	ENSRNOG00000000054
12	ENSRNOT00000000071	-0.353493	3.8992	1.65626	0.198109	0.999516	Pcgf3	ENSRNOG00000000062
14	ENSRNOT00000000074	0.0468816	2.39596	0.0168912	0.896593	0.999516	Fbxo28	ENSRNOG00000000066
15	ENSRNOT00000000078	0.0874189	5.43429	0.162666	0.686714	0.999516	Ppp2r5a	ENSRNOG00000000068
16	ENSRNOT00000000079	-0.0654537	7.70196	0.1014	0.750157	0.999516	Acot7	ENSRNOG00000010580
17	ENSRNOT00000000080	-0.0129718	4.67452	0.00274303	0.958231	0.999516	Dr1	ENSRNOG00000000070
18	ENSRNOT00000000086	-0.177617	2.54604	0.184938	0.667163	0.999516	Mtf2	ENSRNOG00000000075
19	ENSRNOT00000000106	0.322942	2.28774	0.621973	0.430315	0.999516	Gpr89b	ENSRNOG00000000095
20	ENSRNOT00000000107	-0.140083	1.21861	0.138827	0.70945	0.999516	Pdzk1	ENSRNOG00000000096
21	ENSRNOT00000000109	0.27043	1.86985	0.524554	0.468905	0.999516	Cd160	ENSRNOG00000000097
22	ENSRNOT00000000110	-0.148486	5.17293	0.387931	0.533389	0.999516	Rnf115	ENSRNOG00000000098
23	ENSRNOT00000000116	-0.0451835	4.2626	0.0304315	0.861515	0.999516	Thoc3	ENSRNOG00000000104
24	ENSRNOT00000000120	-0.404689	3.37226	1.79847	0.179897	0.999516	Aga	ENSRNOG00000000108
25	ENSRNOT00000000123	-0.131097	3.94591	0.207372	0.648835	0.999516	Coprs	ENSRNOG00000000111
26	ENSRNOT00000000124	0.0460682	4.24334	0.030969	0.86031	0.999516	Champ1	ENSRNOG00000000112
27	ENSRNOT00000000125	0.181223	1.28998	0.229513	0.631885	0.999516	Elac1	ENSRNOG00000000113
28	ENSRNOT00000000133	0.141389	1.39672	0.134517	0.713793	0.999516	Pigv	ENSRNOG00000000121
29	ENSRNOT00000000134	0.222181	3.017	0.460215	0.497524	0.999516	Ak2	ENSRNOG00000000122
30	ENSRNOT00000000142	-0.221611	6.63313	0.958076	0.327672	0.999516	Dnajb5	ENSRNOG00000000130
31	ENSRNOT00000000146	-0.0406709	5.90722	0.0362827	0.848933	0.999516	Txndc15	ENSRNOG00000000133
33	ENSRNOT00000000155	-0.337653	2.32868	0.835972	0.360551	0.999516	Plxdc2	ENSRNOG00000000142
34	ENSRNOT00000000157	-0.642236	2.92404	0.609275	0.435061	0.999516	Pik3r3	ENSRNOG00000000145
35	ENSRNOT00000000162	0.120367	3.5276	0.154813	0.693977	0.999516	Dnajc1	ENSRNOG00000000150
36	ENSRNOT00000000163	0.347533	1.74556	0.870179	0.350906	0.999516	Ldlrap1	ENSRNOG00000000151
37	ENSRNOT00000000168	0.140016	2.34625	0.132691	0.715658	0.999516	Cog3	ENSRNOG00000000155
38	ENSRNOT00000000170	0.068792	5.41623	0.0995665	0.75235	0.999516	Atg12	ENSRNOG00000000157
39	ENSRNOT00000000172	-0.114986	3.59809	0.130171	0.718255	0.999516	Cdo1	ENSRNOG00000000158
40	ENSRNOT00000000177	-0.403521	4.71333	2.53997	0.110997	0.999516	Lamp2	ENSRNOG00000000164
41	ENSRNOT00000000181	-0.0357699	6.07562	0.0325335	0.856862	0.999516	Gatm	ENSRNOG00000000168
42	ENSRNOT00000000199	0.450015	1.69644	1.3727	0.241349	0.999516	Jrk	ENSRNOG00000027238
43	ENSRNOT00000000201	0.242549	4.01961	0.774718	0.378761	0.999516	Mpst	ENSRNOG00000000185
44	ENSRNOT00000000205	0.537673	2.22283	1.95806	0.161721	0.999516	Chadl	ENSRNOG00000024631
45	ENSRNOT00000000239	-0.13215	1.41739	0.0777137	0.78042	0.999516	Abhd5	ENSRNOG00000000221
46	ENSRNOT00000000246	-0.0523913	3.90497	0.0371136	0.847234	0.999516	Lmf1	ENSRNOG00000000230
47	ENSRNOT00000000248	0.10393	2.27854	0.0878328	0.766951	0.999516	Zfp354c	ENSRNOG00000029205
48	ENSRNOT00000000249	0.0172544	1.20483	0.00220441	0.962552	0.999516	Grm6	ENSRNOG00000000233
49	ENSRNOT00000000253	-0.296999	4.0237	0.818708	0.365558	0.999516	Zfp207	ENSRNOG00000000236
50	ENSRNOT00000000254	0.27315	1.24305	0.469116	0.493394	0.999516	RGD1310429	ENSRNOG00000000237
51	ENSRNOT00000000258	-0.0206514	2.35917	0.00169487	0.967161	0.999516	Aatf	ENSRNOG00000002778
52	ENSRNOT00000000260	-0.0460206	1.23162	0.0138311	0.90638	0.999516	RGD1562272	ENSRNOG00000027511
53	ENSRNOT00000000263	0.241349	5.3705	1.2312	0.267174	0.999516	Amz2	ENSRNOG00000000246
54	ENSRNOT00000000264	0.213122	3.38886	0.411996	0.520958	0.999516	Mfsd11	ENSRNOG00000000247
55	ENSRNOT00000000266	0.00498251	2.90963	0.000201763	0.988667	0.999516	Mettl23	ENSRNOG00000000249
56	ENSRNOT00000000279	0.0720228	5.15353	0.0908943	0.763043	0.999516	Zfp821	ENSRNOG00000000262
57	ENSRNOT00000000281	0.150986	4.69644	0.373264	0.541231	0.999516	Def8	ENSRNOG00000000264
58	ENSRNOT00000000299	0.0562981	2.83392	0.00577968	0.9394	0.999516	Phyhipl	ENSRNOG00000000274
59	ENSRNOT00000000304	0.366268	3.87314	1.56674	0.210681	0.999516	Rtn4ip1	ENSRNOG00000000279
60	ENSRNOT00000000306	-0.113207	3.97912	0.154726	0.694059	0.999516	Slc25a1	ENSRNOG00000038001
61	ENSRNOT00000000308	-0.0903765	3.4166	0.0887422	0.765782	0.999516	Ess2	ENSRNOG00000000283
62	ENSRNOT00000000325	-0.046397	3.9845	0.0239492	0.877014	0.999516	Olig2	ENSRNOG00000028658
63	ENSRNOT00000000327	-0.353146	1.48462	0.762251	0.382625	0.999516	Foxo3	ENSRNOG00000000299
64	ENSRNOT00000000334	0.135759	4.80604	0.151821	0.696802	0.999516	Cd164	ENSRNOG00000000304
65	ENSRNOT00000000336	-0.0629972	3.39253	0.0369818	0.847502	0.999516	Smpd2	ENSRNOG00000000306
66	ENSRNOT00000000337	-0.232734	3.33758	0.506111	0.476827	0.999516	Mical1	ENSRNOG00000000307
67	ENSRNOT00000000343	-0.105007	5.24844	0.222391	0.637224	0.999516	Fig4	ENSRNOG00000000312
68	ENSRNOT00000000348	-0.427861	3.97356	1.81931	0.177396	0.999516	Sobp	ENSRNOG00000000316
69	ENSRNOT00000000352	-0.0758891	5.17417	0.11332	0.736396	0.999516	Cd24	ENSRNOG00000000321
70	ENSRNOT00000000434	-0.0470282	1.35132	0.0121227	0.912328	0.999516	Pbld1	ENSRNOG00000000386
71	ENSRNOT00000000443	0.307951	4.14187	1.23248	0.266926	0.999516	Srgn	ENSRNOG00000000394
72	ENSRNOT00000000444	0.0302931	5.92145	0.00817839	0.927942	0.999516	Kifbp	ENSRNOG00000000395
73	ENSRNOT00000000446	-0.0608631	2.11122	0.0198845	0.88786	0.999516	Ddx50	ENSRNOG00000000396
74	ENSRNOT00000000448	0.000612534	4.20801	5.39013e-06	0.998148	0.999516	Zup1	ENSRNOG00000000398
75	ENSRNOT00000000467	-0.0548373	5.84426	0.0724504	0.787802	0.999516	Nus1	ENSRNOG00000000411
76	ENSRNOT00000000468	-0.152915	4.98355	0.414329	0.51978	0.999516	Slc35f1	ENSRNOG00000000412
77	ENSRNOT00000000471	-0.243659	3.15843	0.596367	0.439967	0.999516	Asf1a	ENSRNOG00000000415
78	ENSRNOT00000000474	0.259066	4.97866	0.581642	0.445669	0.999516	Numa1	ENSRNOG00000000417
79	ENSRNOT00000000477	0.444475	2.99528	1.38437	0.239357	0.999516	Cfb	ENSRNOG00000051235
80	ENSRNOT00000000478	0.0956452	4.7671	0.145456	0.702916	0.999516	Nelfe	ENSRNOG00000000420
81	ENSRNOT00000000481	0.0849111	4.85103	0.122883	0.725929	0.999516	Skic2	ENSRNOG00000000421
82	ENSRNOT00000000483	0.0275006	2.64834	0.00632603	0.936606	0.999516	Dxo	ENSRNOG00000000422
83	ENSRNOT00000000492	0.0251567	5.14151	0.00734378	0.931708	0.999516	Atf6b	ENSRNOG00000000431
84	ENSRNOT00000000494	-0.187882	4.5067	0.48384	0.486688	0.999516	Fkbpl	ENSRNOG00000000432
85	ENSRNOT00000000495	-0.234291	7.95677	1.2897	0.256103	0.999516	Prrt1	ENSRNOG00000000433
86	ENSRNOT00000000497	0.298318	1.57961	0.372536	0.541625	0.999516	Ppt2	ENSRNOG00000000435
87	ENSRNOT00000000500	0.0896481	7.054	0.19288	0.66053	0.999516	Agpat1	ENSRNOG00000000437
88	ENSRNOT00000000501	-0.0418124	4.63328	0.0235072	0.878145	0.999516	Rnf5	ENSRNOG00000000438
89	ENSRNOT00000000508	-0.138131	2.76868	0.124071	0.72466	0.999516	Ager	ENSRNOG00000000439
90	ENSRNOT00000000509	0.0058375	5.53113	0.000730832	0.978433	0.999516	Pbx2	ENSRNOG00000000440
91	ENSRNOT00000000513	0.730628	3.32654	2.9748	0.0845707	0.999516	Notch4	ENSRNOG00000000442
92	ENSRNOT00000000522	0.0681635	1.90526	0.021968	0.882172	0.999516	RT1-Db1	ENSRNOG00000033215
93	ENSRNOT00000000523	-0.810228	1.01254	2.21549	0.136631	0.999516	RT1-Ba	ENSRNOG00000000451
94	ENSRNOT00000000525	0.074701	-0.191515	0.0289586	0.864875	0.999516	RT1-Bb	ENSRNOG00000032708
95	ENSRNOT00000000527	0.0898723	2.73051	0.0695407	0.792007	0.999516	Tap2	ENSRNOG00000000455
96	ENSRNOT00000000528	0.270074	2.53269	0.488251	0.484709	0.999516	Psmb8	ENSRNOG00000000456
97	ENSRNOT00000000532	0.351866	2.07863	0.78081	0.376893	0.999516	Psmb9	ENSRNOG00000000459
98	ENSRNOT00000000535	-0.256446	4.04901	0.699774	0.40286	0.999516	Brd2	ENSRNOG00000000461
99	ENSRNOT00000000543	0.453809	1.76526	1.45609	0.227553	0.999516	Ring1	ENSRNOG00000000467
100	ENSRNOT00000000549	-0.349811	1.92013	0.605131	0.436627	0.999516	Vps52	ENSRNOG00000000470
101	ENSRNOT00000000553	-0.00213533	7.01907	6.58707e-05	0.993524	0.999516	Pfdn6	ENSRNOG00000000473
102	ENSRNOT00000000554	0.0690516	5.26442	0.0797687	0.777611	0.999516	Rgl2	ENSRNOG00000000474
103	ENSRNOT00000000558	0.023378	4.54721	0.00892945	0.924715	0.999516	Zbtb22	ENSRNOG00000000476
104	ENSRNOT00000000559	-0.144749	4.36764	0.287521	0.591813	0.999516	Daxx	ENSRNOG00000000477
105	ENSRNOT00000000568	-0.114539	5.3622	0.221651	0.637785	0.999516	Cuta	ENSRNOG00000000481
106	ENSRNOT00000000576	0.197575	3.21209	0.399724	0.527232	0.999516	Bak1	ENSRNOG00000000485
107	ENSRNOT00000000595	-0.0629447	5.44847	0.0740236	0.785566	0.999516	Zfp523	ENSRNOG00000000501
108	ENSRNOT00000000599	0.231634	3.07823	0.372612	0.541584	0.999516	Aip	ENSRNOG00000022289
109	ENSRNOT00000000603	-0.214085	7.24713	0.930462	0.334743	0.999516	Rpl10a	ENSRNOG00000000505
110	ENSRNOT00000000618	0.217841	5.64056	0.80292	0.370222	0.999516	Mapk14	ENSRNOG00000000513
111	ENSRNOT00000000631	0.55118	4.27871	4.03288	0.0446216	0.999516	RGD735065	ENSRNOG00000000524
112	ENSRNOT00000000632	0.0183384	2.77469	0.00268075	0.958707	0.999516	Pi16	ENSRNOG00000000525
113	ENSRNOT00000000635	0.10066	8.81338	0.283271	0.594565	0.999516	Mtch1	ENSRNOG00000000527
114	ENSRNOT00000000639	-0.158222	1.05945	0.167129	0.682676	0.999516	Ccdc167	ENSRNOG00000068717
115	ENSRNOT00000000649	-0.0397951	4.10405	0.016618	0.897428	0.999516	Btbd9	ENSRNOG00000000540
116	ENSRNOT00000000650	0.0167359	6.84538	0.00628923	0.93679	0.999516	Glo1	ENSRNOG00000000541
117	ENSRNOT00000000657	-0.186446	2.35809	0.265789	0.60617	0.999516	Nt5dc1	ENSRNOG00000000546
118	ENSRNOT00000000658	0.0998595	7.39549	0.261025	0.609417	0.999516	Tspyl4	ENSRNOG00000000547
119	ENSRNOT00000000660	-0.275883	5.67541	0.990607	0.319594	0.999516	Tspyl1	ENSRNOG00000000549
120	ENSRNOT00000000662	-0.10192	5.55477	0.229515	0.631884	0.999516	Fam241b	ENSRNOG00000000551
121	ENSRNOT00000000673	0.412166	6.0482	4.03767	0.0444952	0.999516	Ppa1	ENSRNOG00000000557
122	ENSRNOT00000000674	0.0928905	3.55458	0.09242	0.761123	0.999516	Ppa1	ENSRNOG00000063854
123	ENSRNOT00000000676	0.172909	2.7865	0.261318	0.609216	0.999516	Lrrc20	ENSRNOG00000000560
124	ENSRNOT00000000697	0.719453	0.494707	2.96651	0.0850052	0.999516	Chst3	ENSRNOG00000000572
126	ENSRNOT00000000702	0.117557	2.76992	0.102891	0.748388	0.999516	Anapc16	ENSRNOG00000000576
127	ENSRNOT00000000707	-0.0928438	6.77782	0.199448	0.655167	0.999516	Marcks	ENSRNOG00000000579
128	ENSRNOT00000000710	-0.109704	3.61804	0.123266	0.725519	0.999516	Ddo	ENSRNOG00000000582
129	ENSRNOT00000000715	0.0756954	4.47718	0.0844522	0.771352	0.999516	Amd1	ENSRNOG00000000585
130	ENSRNOT00000000716	0.071265	3.59779	0.0634013	0.801199	0.999516	Gtf3c6	ENSRNOG00000000586
131	ENSRNOT00000000733	0.160739	4.73332	0.265975	0.606044	0.999516	Fyn	ENSRNOG00000000596
132	ENSRNOT00000000737	0.200216	3.69638	0.459513	0.497852	0.999516	Lama4	ENSRNOG00000000599
133	ENSRNOT00000000742	0.002697	5.90381	0.0001794	0.989313	0.999516	Hdac2	ENSRNOG00000000604
134	ENSRNOT00000000743	0.166825	1.64472	0.173885	0.676682	0.999516	Hs3st5	ENSRNOG00000000605
135	ENSRNOT00000000748	0.152176	3.02874	0.195866	0.658079	0.999516	Ipmk	ENSRNOG00000000609
136	ENSRNOT00000000749	0.0395275	6.06581	0.0324715	0.856997	0.999516	Cisd1	ENSRNOG00000000610
137	ENSRNOT00000000750	-1.19909	3.50649	4.48892	0.0341153	0.999516	Ube2d1	ENSRNOG00000000611
138	ENSRNOT00000000753	0.243861	4.11756	0.861552	0.353305	0.999516	Tfam	ENSRNOG00000000613
139	ENSRNOT00000000787	-0.405697	1.51232	0.835743	0.360617	0.999516	Arid5b	ENSRNOG00000000635
140	ENSRNOT00000000792	0.534681	3.24924	0.705021	0.401102	0.999516	Egr2	ENSRNOG00000000640
141	ENSRNOT00000000794	0.176836	2.89297	0.225216	0.635094	0.999516	Nrbf2	ENSRNOG00000000641
142	ENSRNOT00000000804	0.140272	5.33963	0.372816	0.541473	0.999516	Jmjd1c	ENSRNOG00000000648
143	ENSRNOT00000000817	-0.132122	4.4893	0.208097	0.648263	0.999516	Nek7	ENSRNOG00000000657
144	ENSRNOT00000000824	0.143082	4.442	0.294593	0.587292	0.999516	Hps4	ENSRNOG00000000661
145	ENSRNOT00000000826	0.887775	1.28878	3.87455	0.0490233	0.999516	Srrd	ENSRNOG00000000662
146	ENSRNOT00000000828	0.0723672	4.56244	0.0856406	0.769794	0.999516	Tfip11	ENSRNOG00000000663
147	ENSRNOT00000000831	0.217487	3.78406	0.621054	0.430656	0.999516	Tpst2	ENSRNOG00000000664
148	ENSRNOT00000000874	0.102667	6.75099	0.259459	0.610492	0.999516	Svop	ENSRNOG00000000693
149	ENSRNOT00000000886	0.0374647	6.02837	0.0333658	0.855062	0.999516	Coro1c	ENSRNOG00000000697
150	ENSRNOT00000000888	-0.20483	3.28227	0.393462	0.530485	0.999516	Selplg	ENSRNOG00000000699
151	ENSRNOT00000000890	0.0103162	6.18405	0.00252758	0.959903	0.999516	Iscu	ENSRNOG00000000701
152	ENSRNOT00000000891	0.0800089	4.7604	0.10506	0.74584	0.999516	Sart3	ENSRNOG00000000702
153	ENSRNOT00000000904	-0.654927	3.39822	1.93038	0.164717	0.999516	Chmp2b	ENSRNOG00000040257
154	ENSRNOT00000000909	0.14869	4.53284	0.357049	0.55015	0.999516	Cggbp1	ENSRNOG00000000718
155	ENSRNOT00000000911	0.14136	1.97638	0.134208	0.714108	0.999516	C11h3orf38	ENSRNOG00000000720
156	ENSRNOT00000000990	-0.0197173	2.5344	0.0033473	0.953863	0.999516	RT1-M3-1	ENSRNOG00000000763
157	ENSRNOT00000001008	0.0459945	3.80645	0.0100763	0.920042	0.999516	Mog	ENSRNOG00000000775
158	ENSRNOT00000001011	0.199039	1.82844	0.242617	0.622322	0.999516	Znrd1as1	ENSRNOG00000000778
159	ENSRNOT00000001012	0.154545	3.06496	0.193746	0.659817	0.999516	Polr1h	ENSRNOG00000000779
160	ENSRNOT00000001013	-0.117895	6.07316	0.337454	0.561303	0.999516	Ppp1r11	ENSRNOG00000000780
161	ENSRNOT00000001021	0.199417	3.00513	0.283911	0.594149	0.999516	Trim39	ENSRNOG00000000785
162	ENSRNOT00000001024	-0.128081	3.46912	0.145314	0.703054	0.999516	Rpp21	ENSRNOG00000000786
163	ENSRNOT00000001036	0.408948	3.11646	1.55173	0.21288	0.999516	RT1-S3	ENSRNOG00000000777
164	ENSRNOT00000001044	0.00545981	5.12813	0.000250623	0.987369	0.999516	Ranbp2	ENSRNOG00000000796
165	ENSRNOT00000001049	-0.0550907	5.98207	0.0536426	0.816842	0.999516	Abcf1	ENSRNOG00000000799
166	ENSRNOT00000001050	0.22756	3.38873	0.589419	0.442644	0.999516	Msl3l2	ENSRNOG00000000801
167	ENSRNOT00000001051	0.408637	1.91521	1.18994	0.275342	0.999516	Tbc1d32	ENSRNOG00000000802
168	ENSRNOT00000001054	0.0593434	6.76882	0.0771404	0.781211	0.999516	Gja1	ENSRNOG00000000805
169	ENSRNOT00000001058	-0.258965	3.66104	0.803528	0.370041	0.999516	Mrps18b	ENSRNOG00000000804
170	ENSRNOT00000001059	-0.207884	3.90384	0.45532	0.499819	0.999516	Hsf2	ENSRNOG00000000808
171	ENSRNOT00000001066	-0.107336	8.42972	0.231684	0.630278	0.999516	Serinc1	ENSRNOG00000029360
172	ENSRNOT00000001075	0.210347	1.16058	0.25412	0.614189	0.999516	Pkib	ENSRNOG00000000811
173	ENSRNOT00000001077	-0.177032	5.87236	0.737139	0.390579	0.999516	Atat1	ENSRNOG00000000809
174	ENSRNOT00000001079	0.101506	4.2496	0.123256	0.725529	0.999516	Fabp7	ENSRNOG00000000814
175	ENSRNOT00000001081	0.206693	3.16839	0.39593	0.529199	0.999516	Smpdl3a	ENSRNOG00000000815
176	ENSRNOT00000001084	-0.207435	3.42821	0.45315	0.500843	0.999516	Ppp1r18	ENSRNOG00000000818
177	ENSRNOT00000001092	-0.223478	4.66391	0.719756	0.396224	0.999516	Gcc2	ENSRNOG00000000823
178	ENSRNOT00000001098	-0.253783	6.22396	0.86842	0.351393	0.999516	Flot1	ENSRNOG00000000826
179	ENSRNOT00000001099	0.299199	2.54265	0.650491	0.419937	0.999516	Ier3	ENSRNOG00000000827
180	ENSRNOT00000001103	-0.0134324	3.89379	0.0024907	0.960197	0.999516	Gtf2h4	ENSRNOG00000000831
181	ENSRNOT00000001108	-0.082081	0.912547	0.039673	0.842121	0.999516	Ltb	ENSRNOG00000070531
182	ENSRNOT00000001113	0.175391	4.10994	0.416616	0.518631	0.999516	Nfkbil1	ENSRNOG00000000839
183	ENSRNOT00000001114	-0.338346	6.75415	1.67319	0.195832	0.999516	Atp6v1g2	ENSRNOG00000000840
184	ENSRNOT00000001115	0.185004	6.59415	0.288626	0.591102	0.999516	Ddx39b	ENSRNOG00000000841
185	ENSRNOT00000001118	-0.0891324	4.20574	0.0799977	0.7773	0.999516	Clic1	ENSRNOG00000029682
186	ENSRNOT00000001123	-0.214355	5.28523	0.615588	0.432692	0.999516	Csnk2b	ENSRNOG00000000847
187	ENSRNOT00000001124	-0.814806	1.59279	2.9263	0.0871468	0.999516	Gpank1	ENSRNOG00000000848
189	ENSRNOT00000001135	-0.36562	1.50423	0.638219	0.424356	0.999516	Aif1	ENSRNOG00000000853
190	ENSRNOT00000001138	-0.0934512	3.58721	0.0866669	0.768458	0.999516	Aif1	ENSRNOG00000000853
191	ENSRNOT00000001146	0.108219	1.24602	0.0823997	0.774071	0.999516	Sapcd1	ENSRNOG00000000858
192	ENSRNOT00000001153	-0.317176	0.832408	0.695412	0.40433	0.999516	Vwa7	ENSRNOG00000000860
193	ENSRNOT00000001160	0.151369	5.54109	0.498915	0.479977	0.999516	Vars1	ENSRNOG00000000867
194	ENSRNOT00000001169	-0.136297	5.36824	0.309279	0.578123	0.999516	Fhl1	ENSRNOG00000000875
195	ENSRNOT00000001185	-0.0422312	0.720769	0.0132873	0.908231	0.999516	Caln1	ENSRNOG00000000886
196	ENSRNOT00000001190	-0.101062	5.28553	0.192558	0.660796	0.999516	Sbds	ENSRNOG00000000888
197	ENSRNOT00000001196	-0.639129	3.34622	3.21753	0.0728534	0.999516	Rabgef1	ENSRNOG00000000895
198	ENSRNOT00000001200	0.0173667	4.2203	0.00453343	0.946318	0.999516	Tpst1	ENSRNOG00000000900
199	ENSRNOT00000001205	-0.0365008	4.21957	0.0194878	0.888977	0.999516	Medag	ENSRNOG00000000906
200	ENSRNOT00000001207	-0.0569076	0.490316	0.0195371	0.888838	0.999516	Alox5ap	ENSRNOG00000000907
201	ENSRNOT00000001211	0.207076	3.22148	0.354508	0.551572	0.999516	Asl	ENSRNOG00000000903
202	ENSRNOT00000001218	-0.177293	2.80918	0.262419	0.608463	0.999516	Nupr2	ENSRNOG00000000917
203	ENSRNOT00000001220	-0.326134	1.45649	0.690993	0.405827	0.999516	Chchd2l2	ENSRNOG00000000918
204	ENSRNOT00000001222	-0.139109	0.57534	0.104342	0.74668	0.999516	Phkg1	ENSRNOG00000000920
205	ENSRNOT00000001227	-0.0236639	5.97561	0.0136563	0.906971	0.999516	Cct6a	ENSRNOG00000000923
206	ENSRNOT00000001228	0.0610307	3.04224	0.0340735	0.853551	0.999516	Psph	ENSRNOG00000000925
207	ENSRNOT00000001243	-0.126228	1.21963	0.116777	0.732557	0.999516	Slc46a3	ENSRNOG00000000937
208	ENSRNOT00000001247	0.0490043	7.4058	0.0601913	0.806194	0.999516	Ran	ENSRNOG00000000938
209	ENSRNOT00000001248	0.401812	4.59311	1.96587	0.160886	0.999516	Flt1	ENSRNOG00000000940
210	ENSRNOT00000001261	-0.144673	4.59877	0.323202	0.56969	0.999516	Polr1d	ENSRNOG00000000954
211	ENSRNOT00000001263	0.203972	2.64743	0.358721	0.549218	0.999516	Lnx2	ENSRNOG00000000955
212	ENSRNOT00000001265	-0.0593932	7.59438	0.0717783	0.788765	0.999516	Rpl21	ENSRNOG00000000957
213	ENSRNOT00000001277	0.147142	2.76983	0.176656	0.674262	0.999516	Slc15a4	ENSRNOG00000000962
214	ENSRNOT00000001289	-0.054678	4.46839	0.0417445	0.838108	0.999516	Zfp358	ENSRNOG00000000974
215	ENSRNOT00000001298	0.454822	2.25607	0.967306	0.325353	0.999516	Pnpla6	ENSRNOG00000000977
216	ENSRNOT00000001299	0.0497829	5.03574	0.0443881	0.833133	0.999516	Scarb1	ENSRNOG00000000981
217	ENSRNOT00000001302	-0.0122158	2.92962	0.00137975	0.970369	0.999516	Zfp394	ENSRNOG00000000983
218	ENSRNOT00000001307	-0.0536893	5.6221	0.0633522	0.801274	0.999516	Bud31	ENSRNOG00000000989
220	ENSRNOT00000001315	0.228613	3.2817	0.526869	0.467926	0.999516	Arpc1b	ENSRNOG00000000991
221	ENSRNOT00000001327	-0.0788261	5.67878	0.129137	0.719329	0.999516	Trappc5	ENSRNOG00000001003
222	ENSRNOT00000001331	0.107183	4.30267	0.0967283	0.755792	0.999516	Nptx2	ENSRNOG00000001006
223	ENSRNOT00000001334	-0.374426	1.55464	0.703345	0.401662	0.999516	Ncor2	ENSRNOG00000001004
224	ENSRNOT00000001336	-0.146373	5.84075	0.426725	0.5136	0.999516	Bri3	ENSRNOG00000001009
225	ENSRNOT00000001347	0.106828	4.99979	0.159613	0.689513	0.999516	Tecpr1	ENSRNOG00000001010
226	ENSRNOT00000001360	0.227997	5.46965	0.32907	0.566207	0.999516	Tsc22d1	ENSRNOG00000001030
227	ENSRNOT00000001365	-0.219221	3.82271	0.454536	0.500189	0.999516	Ccz1b	ENSRNOG00000001032
228	ENSRNOT00000001366	-0.10373	4.57524	0.177222	0.673771	0.999516	Nufip1	ENSRNOG00000001033
230	ENSRNOT00000001368	-0.0226124	3.42016	0.00571568	0.939736	0.999516	Gtf2h3	ENSRNOG00000001035
231	ENSRNOT00000001371	-0.155144	3.18101	0.245472	0.620282	0.999516	Gpalpp1	ENSRNOG00000001037
232	ENSRNOT00000001379	0.0672337	4.6532	0.0702338	0.790997	0.999516	Aimp2	ENSRNOG00000001044
233	ENSRNOT00000001383	-0.0265316	9.16559	0.0155807	0.900664	0.999516	Tpt1	ENSRNOG00000001049
234	ENSRNOT00000001387	0.044051	2.58012	0.0146648	0.903613	0.999516	Ddx55	ENSRNOG00000001043
235	ENSRNOT00000001392	0.301161	5.50506	1.69783	0.192571	0.999516	Eif2ak1	ENSRNOG00000001050
236	ENSRNOT00000001397	0.0322843	6.02599	0.0255584	0.872983	0.999516	Tmed2	ENSRNOG00000001053
237	ENSRNOT00000001398	0.0214544	5.77674	0.0105848	0.918056	0.999516	Snapc2	ENSRNOG00000001056
238	ENSRNOT00000001401	-0.149284	5.5246	0.488819	0.484455	0.999516	Rilpl1	ENSRNOG00000001055
239	ENSRNOT00000001402	-0.113807	4.64168	0.151202	0.69739	0.999516	Snrnp35	ENSRNOG00000001060
240	ENSRNOT00000001403	0.170851	4.72176	0.492851	0.482658	0.999516	Rilpl2	ENSRNOG00000001061
241	ENSRNOT00000001409	0.412972	2.02739	0.601956	0.437833	0.999516	Timm44	ENSRNOG00000001058
242	ENSRNOT00000001412	0.253843	4.41378	0.923066	0.336671	0.999516	Cyth3	ENSRNOG00000001065
243	ENSRNOT00000001415	0.08725	1.89217	0.0569703	0.81135	0.999516	Elavl1	ENSRNOG00000001069
244	ENSRNOT00000001418	-0.397312	3.02384	1.50069	0.220565	0.999516	Cers4	ENSRNOG00000001072
245	ENSRNOT00000001419	-0.406594	6.00947	2.81349	0.0934747	0.999516	Cdk2ap1	ENSRNOG00000001070
246	ENSRNOT00000001432	-0.0634863	5.28795	0.0652525	0.798379	0.999516	Arl6ip4	ENSRNOG00000001080
247	ENSRNOT00000001433	0.176578	3.59606	0.382482	0.536278	0.999516	Ogfod2	ENSRNOG00000001081
248	ENSRNOT00000001438	0.00927839	4.87136	0.00149322	0.969176	0.999516	Kdelr2	ENSRNOG00000001083
249	ENSRNOT00000001444	0.177284	2.84873	0.245782	0.620061	0.999516	Rfc3	ENSRNOG00000001088
250	ENSRNOT00000001445	0.0464855	5.45198	0.0477629	0.827003	0.999516	Vps37b	ENSRNOG00000001086
251	ENSRNOT00000001455	0.224162	2.03952	0.373993	0.540836	0.999516	Rbak	ENSRNOG00000001099
252	ENSRNOT00000001458	-0.0752758	4.33541	0.0863591	0.768858	0.999516	Rnf216	ENSRNOG00000001101
253	ENSRNOT00000001464	-0.0973122	5.23348	0.15703	0.691906	0.999516	Pds5b	ENSRNOG00000001098
254	ENSRNOT00000001466	-0.401482	1.00256	0.945701	0.330816	0.999516	Foxk1	ENSRNOG00000001104
255	ENSRNOT00000001467	0.0397034	5.83231	0.0313997	0.859352	0.999516	Denr	ENSRNOG00000001106
256	ENSRNOT00000001468	-0.23698	2.78903	0.445139	0.504652	0.999516	N4bp2l2	ENSRNOG00000001108
257	ENSRNOT00000001476	0.137492	3.9992	0.26135	0.609194	0.999516	Wipi2	ENSRNOG00000001114
258	ENSRNOT00000001477	-0.173973	3.29717	0.308318	0.578714	0.999516	Slc29a4	ENSRNOG00000001115
259	ENSRNOT00000001485	0.313773	2.89769	0.80061	0.370911	0.999516	Spring1	ENSRNOG00000001123
260	ENSRNOT00000001486	0.030586	6.14055	0.0235942	0.877922	0.999516	Rnft2	ENSRNOG00000001124
261	ENSRNOT00000001490	0.683942	4.4134	3.00974	0.0827653	0.999516	Tesc	ENSRNOG00000001128
262	ENSRNOT00000001498	0.246298	3.63448	0.653599	0.418829	0.999516	Rfc5	ENSRNOG00000001134
263	ENSRNOT00000001500	-0.0460537	8.55612	0.0501826	0.822746	0.999516	Pebp1	ENSRNOG00000001136
264	ENSRNOT00000001503	-0.258927	3.76671	0.633722	0.425993	0.999516	Taok3	ENSRNOG00000001138
265	ENSRNOT00000001507	-0.289033	3.52397	0.930464	0.334742	0.999516	Srrm4	ENSRNOG00000001141
266	ENSRNOT00000001508	0.159739	3.82306	0.324079	0.569167	0.999516	Prkab1	ENSRNOG00000001142
267	ENSRNOT00000001517	-0.165632	5.98621	0.295577	0.586669	0.999516	Gcn1	ENSRNOG00000021871
268	ENSRNOT00000001518	0.139252	8.32969	0.440886	0.506695	0.999516	Rplp0	ENSRNOG00000001148
269	ENSRNOT00000001532	0.0119274	4.46081	0.00209844	0.963463	0.999516	Msi1	ENSRNOG00000001156
270	ENSRNOT00000001534	-0.0871819	3.84847	0.0998936	0.751957	0.999516	Triap1	ENSRNOG00000001160
271	ENSRNOT00000001536	-0.0739258	4.9625	0.0917069	0.762018	0.999516	Srsf9	ENSRNOG00000001163
272	ENSRNOT00000001544	0.0770499	3.25969	0.0602364	0.806123	0.999516	Slc37a1	ENSRNOG00000001169
273	ENSRNOT00000001545	-0.240729	8.65357	1.32859	0.249056	0.999516	Cox6a1	ENSRNOG00000001170
274	ENSRNOT00000001546	0.0481702	4.60929	0.0386052	0.844233	0.999516	Coq5	ENSRNOG00000001171
275	ENSRNOT00000001551	0.188958	5.67905	0.537262	0.46357	0.999516	Cabp1	ENSRNOG00000001173
276	ENSRNOT00000001556	0.478113	2.35248	1.4985	0.220903	0.999516	Acads	ENSRNOG00000001177
277	ENSRNOT00000001559	-0.0978025	4.77755	0.12714	0.721416	0.999516	Pde9a	ENSRNOG00000001174
278	ENSRNOT00000001562	0.219366	5.50502	1.07697	0.299376	0.999516	Sppl3	ENSRNOG00000001178
279	ENSRNOT00000001564	0.091933	5.05509	0.136001	0.712289	0.999516	Ndufv3	ENSRNOG00000001182
280	ENSRNOT00000001566	0.366897	1.42596	0.702421	0.401972	0.999516	Pknox1	ENSRNOG00000001184
281	ENSRNOT00000001577	0.0483037	4.73125	0.0382793	0.844883	0.999516	Tchp	ENSRNOG00000001191
282	ENSRNOT00000001579	0.0522037	2.03109	0.0157582	0.900103	0.999516	Sik1	ENSRNOG00000001189
283	ENSRNOT00000001581	-0.0741781	4.57355	0.0821609	0.77439	0.999516	Gltp	ENSRNOG00000001192
284	ENSRNOT00000001583	0.0723807	2.4964	0.0402144	0.841062	0.999516	Rrp1b	ENSRNOG00000001194
285	ENSRNOT00000001588	-0.198839	2.05305	0.288168	0.591397	0.999516	Fam222a	ENSRNOG00000001198
286	ENSRNOT00000001589	-0.16243	2.93843	0.199793	0.654888	0.999516	Pdxk	ENSRNOG00000049937
287	ENSRNOT00000001591	0.148826	4.74282	0.321172	0.570904	0.999516	Pop5	ENSRNOG00000001199
288	ENSRNOT00000001593	-0.117073	5.27656	0.228609	0.632557	0.999516	Cstb	ENSRNOG00000001201
289	ENSRNOT00000001595	0.1404	4.86165	0.330501	0.565364	0.999516	Ankrd13a	ENSRNOG00000001204
290	ENSRNOT00000001600	0.237555	1.95985	0.391573	0.531474	0.999516	Oasl2	ENSRNOG00000028814
291	ENSRNOT00000001602	0.0569469	6.84431	0.0815006	0.775274	0.999516	Agpat3	ENSRNOG00000001205
292	ENSRNOT00000001609	0.0504399	6.20074	0.0606776	0.805428	0.999516	Gatd3a	ENSRNOG00000001211
293	ENSRNOT00000001625	-0.0139111	6.23907	0.00478437	0.944855	0.999516	Pfkl	ENSRNOG00000001214
294	ENSRNOT00000001631	0.0135096	3.7115	0.00209458	0.963496	0.999516	Trpm2	ENSRNOG00000001216
295	ENSRNOT00000001632	-0.51024	-0.261635	1.37934	0.240214	0.999516	Lrrc3	ENSRNOG00000001217
296	ENSRNOT00000001636	0.246776	4.60527	0.952644	0.329047	0.999516	Ube2g2	ENSRNOG00000001222
297	ENSRNOT00000001637	-0.00907116	6.27407	0.00197043	0.964594	0.999516	Sumo3	ENSRNOG00000038489
298	ENSRNOT00000001638	0.777255	3.05129	4.25291	0.0391831	0.999516	Pttg1ip	ENSRNOG00000001223
299	ENSRNOT00000001640	0.191137	4.40616	0.570734	0.449967	0.999516	Slx9	ENSRNOG00000001225
300	ENSRNOT00000001642	0.201241	2.07409	0.24091	0.623549	0.999516	Adarb1	ENSRNOG00000001227
301	ENSRNOT00000001644	-0.0959778	4.65242	0.147504	0.700933	0.999516	Pofut2	ENSRNOG00000001228
302	ENSRNOT00000001654	0.0656064	6.79216	0.0937547	0.759457	0.999516	Gna12	ENSRNOG00000001235
303	ENSRNOT00000001659	-0.0111219	5.87151	0.00282416	0.957618	0.999516	Cabin1	ENSRNOG00000001237
304	ENSRNOT00000001675	-0.447775	2.93451	1.13994	0.285664	0.999516	Pcbp3	ENSRNOG00000001245
305	ENSRNOT00000001679	0.435346	6.44644	2.70416	0.100087	0.999516	Col6a1	ENSRNOG00000001249
306	ENSRNOT00000001688	-0.142691	3.47157	0.229534	0.631869	0.999516	Chst12	ENSRNOG00000001252
307	ENSRNOT00000001690	0.293678	4.71068	1.20257	0.272808	0.999516	Mlxip	ENSRNOG00000001255
308	ENSRNOT00000001691	-0.0488192	4.78898	0.0396381	0.84219	0.999516	Atxn2	ENSRNOG00000001256
309	ENSRNOT00000001695	0.449028	5.04189	3.20194	0.0735511	0.999516	Col6a2	ENSRNOG00000001254
310	ENSRNOT00000001696	0.328593	3.166	0.90611	0.341149	0.999516	Snx8	ENSRNOG00000001258
311	ENSRNOT00000001697	-0.0552443	5.28432	0.0487242	0.825298	0.999516	Cux2	ENSRNOG00000001259
312	ENSRNOT00000001699	-0.504291	1.59277	1.56534	0.210886	0.999516	Ftcd	ENSRNOG00000001261
313	ENSRNOT00000001700	0.310104	1.03602	0.670088	0.413021	0.999516	Nudt1	ENSRNOG00000001260
314	ENSRNOT00000001712	-0.000469591	1.30057	1.53554e-06	0.999011	0.999516	Hvcn1	ENSRNOG00000001270
315	ENSRNOT00000001716	0.266794	4.40222	0.959503	0.327312	0.999516	Psmg3	ENSRNOG00000001273
316	ENSRNOT00000001720	0.0205653	3.05512	0.00311518	0.95549	0.999516	Mafk	ENSRNOG00000065794
317	ENSRNOT00000001722	-0.163933	3.00184	0.243294	0.621837	0.999516	Gpn3	ENSRNOG00000001278
318	ENSRNOT00000001729	0.107067	5.20469	0.213416	0.644103	0.999516	Anapc7	ENSRNOG00000001283
319	ENSRNOT00000001734	-0.023696	4.63674	0.0089436	0.924656	0.999516	LOC498154	ENSRNOG00000001289
320	ENSRNOT00000001738	0.0538045	8.80235	0.078168	0.779796	0.999516	Atp2a2	ENSRNOG00000001285
321	ENSRNOT00000001743	0.078525	9.70274	0.173336	0.677164	0.999516	S100b	ENSRNOG00000001295
322	ENSRNOT00000001745	0.107597	5.34161	0.239117	0.624844	0.999516	Get4	ENSRNOG00000001293
323	ENSRNOT00000001746	0.0608195	2.70632	0.0197261	0.888305	0.999516	P2rx7	ENSRNOG00000001296
324	ENSRNOT00000001759	0.275926	1.12236	0.561564	0.453631	0.999516	Adora2a	ENSRNOG00000001302
325	ENSRNOT00000001766	0.0199148	2.51131	0.00279652	0.957826	0.999516	Bcr	ENSRNOG00000001304
326	ENSRNOT00000001772	-0.0194721	3.81387	0.00444598	0.946838	0.999516	Rab36	ENSRNOG00000001311
327	ENSRNOT00000001775	0.0447492	4.64894	0.0213037	0.883955	0.999516	Pdgfa	ENSRNOG00000001312
328	ENSRNOT00000001779	-0.0789684	3.4447	0.042569	0.836539	0.999516	Gnaz	ENSRNOG00000001313
329	ENSRNOT00000001783	0.231789	3.73627	0.593811	0.440949	0.999516	Fam20c	ENSRNOG00000001314
330	ENSRNOT00000001792	0.483196	4.16657	2.43824	0.118409	0.999516	Il3ra	ENSRNOG00000001325
331	ENSRNOT00000001794	0.154127	6.43598	0.526384	0.468131	0.999516	Anapc5	ENSRNOG00000001316
332	ENSRNOT00000001799	0.05502	4.78082	0.0525613	0.818665	0.999516	Rnf34	ENSRNOG00000001331
333	ENSRNOT00000001806	-0.0953832	2.63015	0.0703458	0.790834	0.999516	Orai1	ENSRNOG00000001336
334	ENSRNOT00000001807	-0.102495	2.92144	0.0454498	0.831179	0.999516	Setd1b	ENSRNOG00000001337
335	ENSRNOT00000001810	-0.0527452	3.26265	0.028448	0.86606	0.999516	Zscan21	ENSRNOG00000039234
336	ENSRNOT00000001813	0.095393	0.660558	0.0603361	0.805966	0.999516	Cfap251	ENSRNOG00000001342
337	ENSRNOT00000001816	0.250497	5.8911	1.37545	0.240877	0.999516	Aldh2	ENSRNOG00000037815
338	ENSRNOT00000001817	-0.366889	3.41903	1.45561	0.22763	0.999516	Mapkapk5	ENSRNOG00000001345
339	ENSRNOT00000001818	0.3061	2.73037	0.693399	0.405011	0.999516	Adam1a	ENSRNOG00000001347
340	ENSRNOT00000001820	0.122577	6.86519	0.292883	0.588379	0.999516	Cops6	ENSRNOG00000001346
341	ENSRNOT00000001822	0.0952397	6.42217	0.183641	0.668263	0.999516	Erp29	ENSRNOG00000001348
342	ENSRNOT00000001825	0.0169298	3.41289	0.00302568	0.956134	0.999516	Mcm7	ENSRNOG00000001349
343	ENSRNOT00000001826	-0.00424277	6.928	0.000395816	0.984127	0.999516	Hectd4	ENSRNOG00000001352
344	ENSRNOT00000001827	0.1723	5.35214	0.54755	0.45932	0.999516	Ap4m1	ENSRNOG00000001353
345	ENSRNOT00000001829	-0.267147	3.58816	0.791341	0.373695	0.999516	Taf6	ENSRNOG00000001355
346	ENSRNOT00000001844	0.392832	4.70852	1.00682	0.315665	0.999516	Rph3a	ENSRNOG00000001368
347	ENSRNOT00000001849	0.255866	0.757447	0.339275	0.560248	0.999516	Gpc2	ENSRNOG00000001367
348	ENSRNOT00000001855	-0.188383	1.72844	0.24552	0.620248	0.999516	Gal3st4	ENSRNOG00000001375
349	ENSRNOT00000001856	0.0899203	6.8091	0.153378	0.695328	0.999516	Rasal1	ENSRNOG00000001374
350	ENSRNOT00000001859	0.104538	4.44471	0.167859	0.682022	0.999516	Ddx54	ENSRNOG00000001377
351	ENSRNOT00000001869	0.0133396	0.028938	0.000887242	0.976237	0.999516	Tsc22d4	ENSRNOG00000050805
352	ENSRNOT00000001871	0.243392	4.24076	0.873014	0.350122	0.999516	Mepce	ENSRNOG00000001387
353	ENSRNOT00000001872	0.0924927	5.2191	0.167558	0.682291	0.999516	Plbd2	ENSRNOG00000001385
354	ENSRNOT00000001874	0.42103	0.350105	1.0228	0.311855	0.999516	Irs3	ENSRNOG00000001389
355	ENSRNOT00000001882	0.549766	2.82014	2.11644	0.145725	0.999516	Sdsl	ENSRNOG00000001391
356	ENSRNOT00000001890	-0.116739	4.23746	0.199844	0.654846	0.999516	Mospd3	ENSRNOG00000001396
357	ENSRNOT00000001891	0.170708	3.14874	0.284968	0.593464	0.999516	Rbm19	ENSRNOG00000001397
358	ENSRNOT00000001894	0.383714	2.1169	0.731428	0.392421	0.999516	Pcolce	ENSRNOG00000025001
359	ENSRNOT00000001910	-0.00892025	6.16457	0.00182097	0.965962	0.999516	Actl6b	ENSRNOG00000001408
360	ENSRNOT00000001912	0.250127	4.18852	0.565113	0.452207	0.999516	Gigyf1	ENSRNOG00000001410
361	ENSRNOT00000001913	0.0147886	4.29881	0.00319868	0.954898	0.999516	Pop7	ENSRNOG00000025310
363	ENSRNOT00000001921	-0.0310225	4.70113	0.0151154	0.902151	0.999516	Plod3	ENSRNOG00000001417
364	ENSRNOT00000001923	0.215383	-0.346389	0.23136	0.630517	0.999516	Cldn15	ENSRNOG00000001419
365	ENSRNOT00000001924	-0.58575	4.32764	4.66292	0.0308207	0.999516	Fis1	ENSRNOG00000001420
366	ENSRNOT00000001935	-0.299845	1.64992	0.575862	0.447939	0.999516	Sh2b2	ENSRNOG00000001425
367	ENSRNOT00000001938	0.206911	4.74202	0.625879	0.428871	0.999516	Orai2	ENSRNOG00000001427
368	ENSRNOT00000001939	0.249406	1.7578	0.464386	0.495581	0.999516	Alkbh4	ENSRNOG00000001428
369	ENSRNOT00000001940	0.0965714	4.00821	0.111956	0.737928	0.999516	Lrwd1	ENSRNOG00000001429
370	ENSRNOT00000001941	-0.157329	4.83364	0.358143	0.549539	0.999516	Polr2j	ENSRNOG00000001430
371	ENSRNOT00000001943	-0.434501	1.70779	1.14002	0.285649	0.999516	Rasa4	ENSRNOG00000001431
372	ENSRNOT00000001954	-0.142754	5.46556	0.41554	0.519171	0.999516	Ywhag	ENSRNOG00000001436
373	ENSRNOT00000001958	-0.310081	5.93701	1.09051	0.296358	0.999516	Mdh2	ENSRNOG00000001440
374	ENSRNOT00000001960	-0.186251	3.09291	0.277141	0.598581	0.999516	Tmem120a	ENSRNOG00000001441
375	ENSRNOT00000001961	0.00890911	5.92813	0.00192671	0.964989	0.999516	Por	ENSRNOG00000001442
376	ENSRNOT00000001962	0.144823	5.4646	0.447369	0.503587	0.999516	Rhbdd2	ENSRNOG00000001443
377	ENSRNOT00000001970	0.0569697	4.90547	0.0538706	0.81646	0.999516	Nsun5	ENSRNOG00000001450
378	ENSRNOT00000001973	0.00673011	2.35514	0.000358404	0.984896	0.999516	Fzd9	ENSRNOG00000001452
379	ENSRNOT00000001975	0.0548166	7.10797	0.054422	0.81554	0.999516	Baz1b	ENSRNOG00000001453
380	ENSRNOT00000001989	0.342699	2.98544	0.920351	0.337383	0.999516	Rfc2	ENSRNOG00000001457
381	ENSRNOT00000001996	0.179662	2.26976	0.222507	0.637136	0.999516	Limk1	ENSRNOG00000001470
382	ENSRNOT00000002020	0.540756	2.93442	0.578915	0.446738	0.999516	Gtf2i	ENSRNOG00000001479
383	ENSRNOT00000002032	0.143889	4.00421	0.290701	0.589772	0.999516	Rcc1l	ENSRNOG00000001483
384	ENSRNOT00000002038	-0.14603	2.80936	0.189065	0.663696	0.999516	Tbp	ENSRNOG00000001489
385	ENSRNOT00000002040	0.211213	3.84656	0.567436	0.45128	0.999516	Pdcd2	ENSRNOG00000001490
386	ENSRNOT00000002044	0.016484	7.45044	0.006503	0.935727	0.999516	Napa	ENSRNOG00000001494
387	ENSRNOT00000002050	-0.133055	0.505807	0.107198	0.743356	0.999516	Mia	ENSRNOG00000001499
388	ENSRNOT00000002052	0.212871	3.85666	0.347024	0.555803	0.999516	Rab4b	ENSRNOG00000001500
389	ENSRNOT00000002053	-0.218603	3.82833	0.627813	0.428159	0.999516	Snrpa	ENSRNOG00000001501
390	ENSRNOT00000002058	-0.0473567	6.25287	0.0588498	0.808323	0.999516	Tmem35a	ENSRNOG00000001506
391	ENSRNOT00000002066	0.307794	0.534698	0.600319	0.438456	0.999516	Cdca7	ENSRNOG00000001514
392	ENSRNOT00000002068	0.256824	1.66249	0.423562	0.515165	0.999516	Map3k20	ENSRNOG00000001515
393	ENSRNOT00000002072	-0.154072	3.41016	0.136985	0.711297	0.999516	Pdk1	ENSRNOG00000001517
394	ENSRNOT00000002075	-0.267639	1.88184	0.160986	0.688251	0.999516	Itga6	ENSRNOG00000001518
395	ENSRNOT00000002076	-0.603965	1.56708	2.00662	0.156614	0.999516	Dlx2	ENSRNOG00000001519
396	ENSRNOT00000002078	-0.164594	4.33144	0.416835	0.518521	0.999516	Dlx1	ENSRNOG00000001520
397	ENSRNOT00000002091	-0.240018	8.71257	1.59427	0.206717	0.999516	Gap43	ENSRNOG00000001528
398	ENSRNOT00000002116	-0.146696	7.3326	0.403598	0.525237	0.999516	Atp5pf	ENSRNOG00000001551
399	ENSRNOT00000002121	-0.288398	4.51378	1.29769	0.254636	0.999516	Btg3	ENSRNOG00000001555
400	ENSRNOT00000002150	0.133997	3.2868	0.129392	0.719063	0.999516	Usp25	ENSRNOG00000001573
401	ENSRNOT00000002158	0.149149	1.27131	0.118311	0.730874	0.999516	Map3k7cl	ENSRNOG00000001584
402	ENSRNOT00000002169	0.618971	4.40761	3.23605	0.0720341	0.999516	Cct8	ENSRNOG00000001592
403	ENSRNOT00000002173	0.0416625	4.07745	0.0237922	0.877415	0.999516	Usp16	ENSRNOG00000001598
404	ENSRNOT00000002174	0.150269	4.31098	0.249311	0.617561	0.999516	Atf2	ENSRNOG00000001597
405	ENSRNOT00000002180	0.281714	3.71577	0.92865	0.335214	0.999516	Ltn1	ENSRNOG00000001602
406	ENSRNOT00000002182	-0.195879	2.87457	0.334396	0.563082	0.999516	N6amt1	ENSRNOG00000001603
407	ENSRNOT00000002187	0.416132	1.38605	1.16194	0.281063	0.999516	Adamts1	ENSRNOG00000001607
408	ENSRNOT00000002191	-0.0994326	1.87818	0.0641666	0.800028	0.999516	Cep97	ENSRNOG00000001609
409	ENSRNOT00000002194	0.286929	7.64124	1.5523	0.212796	0.999516	Rpl24	ENSRNOG00000001611
410	ENSRNOT00000002198	0.123897	3.81523	0.210274	0.646553	0.999516	Trmt10c	ENSRNOG00000039567
411	ENSRNOT00000002222	0.659102	4.64789	1.76302	0.184248	0.999516	Get1	ENSRNOG00000001629
412	ENSRNOT00000002238	0.0692273	6.69838	0.116571	0.732784	0.999516	Tomm70	ENSRNOG00000001640
413	ENSRNOT00000002242	-0.0870811	4.47388	0.0995128	0.752415	0.999516	Psmg1	ENSRNOG00000001643
414	ENSRNOT00000002255	0.011872	2.57817	0.00120642	0.972292	0.999516	St3gal6	ENSRNOG00000001653
415	ENSRNOT00000002257	0.122511	3.97143	0.208043	0.648305	0.999516	Cpox	ENSRNOG00000001654
416	ENSRNOT00000002260	0.0828745	5.33218	0.140606	0.70768	0.999516	Cldnd1	ENSRNOG00000001657
417	ENSRNOT00000002284	0.217514	2.24299	0.301205	0.583128	0.999516	Vps26c	ENSRNOG00000001681
418	ENSRNOT00000002292	0.602862	1.71724	2.5875	0.10771	0.999516	Crybg3	ENSRNOG00000045728
419	ENSRNOT00000002293	0.228999	2.83592	0.235955	0.627143	0.999516	Arl6	ENSRNOG00000001689
420	ENSRNOT00000002308	0.404515	1.41181	0.872833	0.350172	0.999516	Setd4	ENSRNOG00000001699
421	ENSRNOT00000002309	-0.05061	5.26319	0.0478821	0.82679	0.999516	Whrn	ENSRNOG00000001700
422	ENSRNOT00000002310	-0.0700617	2.4504	0.0343605	0.852942	0.999516	Cbr3	ENSRNOG00000001701
423	ENSRNOT00000002316	0.194165	6.67178	0.686907	0.407219	0.999516	Abcc5	ENSRNOG00000029178
424	ENSRNOT00000002321	0.126686	4.62781	0.270066	0.603287	0.999516	Eif2b5	ENSRNOG00000038160
425	ENSRNOT00000002323	-0.00537824	3.93573	0.000273216	0.986812	0.999516	Dvl3	ENSRNOG00000001708
426	ENSRNOT00000002327	0.102275	5.23697	0.208776	0.647728	0.999516	Abcf3	ENSRNOG00000001710
427	ENSRNOT00000002329	0.147528	2.88679	0.194015	0.659596	0.999516	Plaat1	ENSRNOG00000001711
428	ENSRNOT00000002333	-0.247451	2.33857	0.504453	0.47755	0.999516	Atp13a4	ENSRNOG00000001714
429	ENSRNOT00000002346	-0.10541	3.66558	0.124235	0.724486	0.999516	Hes1	ENSRNOG00000001720
430	ENSRNOT00000002353	0.140077	3.87587	0.2354	0.627549	0.999516	Tmem44	ENSRNOG00000001726
431	ENSRNOT00000002354	-0.0158904	3.95001	0.00358957	0.952225	0.999516	Lsg1	ENSRNOG00000001727
432	ENSRNOT00000002355	0.162491	3.38458	0.269764	0.60349	0.999516	Fam43a	ENSRNOG00000001728
433	ENSRNOT00000002356	-0.14843	3.26681	0.190581	0.662433	0.999516	Xxylt1	ENSRNOG00000001729
434	ENSRNOT00000002358	-0.021109	6.85117	0.0109243	0.916757	0.999516	Psmd2	ENSRNOG00000001719
435	ENSRNOT00000002361	-0.181152	6.46568	0.77576	0.378441	0.999516	Ppp1r2	ENSRNOG00000001733
436	ENSRNOT00000002366	0.0805572	4.03403	0.0873785	0.767537	0.999516	Bdh1	ENSRNOG00000001736
437	ENSRNOT00000002373	-0.0335733	3.30031	0.0114678	0.914719	0.999516	Meltf	ENSRNOG00000001739
438	ENSRNOT00000002381	-0.0169054	5.14638	0.00528608	0.942041	0.999516	Ncbp2	ENSRNOG00000001746
439	ENSRNOT00000002382	-0.123059	4.34731	0.179407	0.671883	0.999516	Polr2h	ENSRNOG00000001748
440	ENSRNOT00000002394	-0.0207332	4.98412	0.00619026	0.937289	0.999516	Chrd	ENSRNOG00000001750
441	ENSRNOT00000002395	0.0734798	3.83487	0.0706941	0.790329	0.999516	Rnf168	ENSRNOG00000043345
442	ENSRNOT00000002397	0.397336	2.31473	1.01756	0.313097	0.999516	Dynlt2b	ENSRNOG00000001758
443	ENSRNOT00000002403	0.162784	4.62195	0.407531	0.523225	0.999516	Pcyt1a	ENSRNOG00000001762
444	ENSRNOT00000002407	-0.217935	3.22587	0.134345	0.713969	0.999516	Tfrc	ENSRNOG00000001766
445	ENSRNOT00000002411	-0.102123	5.71771	0.114592	0.734975	0.999516	Tnk2	ENSRNOG00000001769
446	ENSRNOT00000002425	-0.37966	2.6379	0.432503	0.510763	0.999516	Senp2	ENSRNOG00000001773
447	ENSRNOT00000002427	-0.109428	0.470045	0.0694646	0.792118	0.999516	Lmln	ENSRNOG00000001781
448	ENSRNOT00000002432	0.0385533	5.49021	0.0320848	0.857842	0.999516	Snx4	ENSRNOG00000001786
449	ENSRNOT00000002443	0.149248	4.6112	0.297376	0.585532	0.999516	Heg1	ENSRNOG00000001793
450	ENSRNOT00000002445	0.0402688	5.93908	0.0298511	0.862828	0.999516	Etv5	ENSRNOG00000001785
452	ENSRNOT00000002462	0.199229	4.3924	0.58057	0.446089	0.999516	Dnajb11	ENSRNOG00000001803
453	ENSRNOT00000002465	0.092084	2.55453	0.0709849	0.789908	0.999516	Sspn	ENSRNOG00000001807
454	ENSRNOT00000002476	-0.144296	5.62956	0.474777	0.490798	0.999516	Fgfr1op2	ENSRNOG00000001811
455	ENSRNOT00000002482	0.869096	2.57642	1.81747	0.177614	0.999516	Dnm1l	ENSRNOG00000001813
456	ENSRNOT00000002484	0.0756612	8.20572	0.150662	0.697903	0.999516	Eif4a2	ENSRNOG00000001815
457	ENSRNOT00000002486	-0.597646	2.48308	2.05599	0.151609	0.999516	Tm7sf3	ENSRNOG00000001817
458	ENSRNOT00000002487	0.198088	3.18453	0.382016	0.536526	0.999516	Rfc4	ENSRNOG00000001816
459	ENSRNOT00000002496	-0.154162	1.83311	0.12228	0.726575	0.999516	St6gal1	ENSRNOG00000001823
460	ENSRNOT00000002500	0.468664	2.695	1.50684	0.219622	0.999516	Med21	ENSRNOG00000001820
461	ENSRNOT00000002502	0.111621	2.65731	0.0986911	0.753406	0.999516	Stk38l	ENSRNOG00000001828
462	ENSRNOT00000002510	0.333862	2.49763	0.921416	0.337104	0.999516	Mcm4	ENSRNOG00000001833
463	ENSRNOT00000002519	-0.218756	8.25693	0.885545	0.346687	0.999516	Sst	ENSRNOG00000001837
464	ENSRNOT00000002520	-0.116035	5.03203	0.20931	0.647309	0.999516	Mrps35	ENSRNOG00000001842
465	ENSRNOT00000002522	-0.364802	3.68938	1.42319	0.232879	0.999516	Bcl6	ENSRNOG00000001843
466	ENSRNOT00000002523	0.146795	0.423177	0.104843	0.746094	0.999516	Klhl42	ENSRNOG00000001844
467	ENSRNOT00000002524	0.110011	4.87253	0.188209	0.664412	0.999516	Top3b	ENSRNOG00000001845
468	ENSRNOT00000002528	-0.167843	4.15152	0.394806	0.529784	0.999516	Far2	ENSRNOG00000001851
469	ENSRNOT00000002530	0.234463	4.83457	0.793037	0.373183	0.999516	Ppm1f	ENSRNOG00000037909
470	ENSRNOT00000002533	-0.298432	5.07751	0.802671	0.370296	0.999516	Mapk1	ENSRNOG00000001849
471	ENSRNOT00000002540	0.0801277	3.04269	0.058076	0.809563	0.999516	Sdf2l1	ENSRNOG00000001859
472	ENSRNOT00000002546	0.0233419	3.33461	0.0056503	0.940081	0.999516	Tmem191c	ENSRNOG00000001864
473	ENSRNOT00000002550	0.0713224	4.3357	0.0731073	0.786865	0.999516	Snap29	ENSRNOG00000001867
474	ENSRNOT00000002552	-0.01715	4.52813	0.00437842	0.947243	0.999516	Crkl	ENSRNOG00000001868
475	ENSRNOT00000002553	-0.0198383	0.410509	0.00222955	0.962339	0.999516	Rab44	ENSRNOG00000001869
476	ENSRNOT00000002554	-0.0698225	4.47325	0.0214782	0.883484	0.999516	Lztr1	ENSRNOG00000001870
477	ENSRNOT00000002560	-0.232563	3.82177	0.609027	0.435154	0.999516	Slc7a4	ENSRNOG00000001874
478	ENSRNOT00000002567	0.122529	1.24902	0.0937685	0.75944	0.999516	Ccdc74a	ENSRNOG00000001876
479	ENSRNOT00000002574	-0.0722801	6.11671	0.114122	0.7355	0.999516	Dgcr6	ENSRNOG00000001880
480	ENSRNOT00000002576	0.121104	5.67297	0.331157	0.564979	0.999516	Prodh	ENSRNOG00000000281
481	ENSRNOT00000002579	-0.120574	5.67256	0.30766	0.57912	0.999516	Ranbp1	ENSRNOG00000001884
482	ENSRNOT00000002581	0.143924	4.53451	0.328842	0.566342	0.999516	Dgcr8	ENSRNOG00000001886
483	ENSRNOT00000002593	0.0272121	3.76582	0.00902786	0.924303	0.999516	Txnrd2	ENSRNOG00000001890
484	ENSRNOT00000002597	-0.160112	0.89955	0.149564	0.698953	0.999516	Tbx1	ENSRNOG00000001892
485	ENSRNOT00000002638	-0.513096	4.30241	1.22924	0.267555	0.999516	Scyl2	ENSRNOG00000024955
486	ENSRNOT00000002650	-0.123222	4.46693	0.215916	0.642169	0.999516	Fgf12	ENSRNOG00000001931
487	ENSRNOT00000002656	-0.192678	1.34843	0.17568	0.675112	0.999516	Rps2-ps6	ENSRNOG00000022934
488	ENSRNOT00000002679	0.644566	1.16342	2.67485	0.101945	0.999516	Bace2	ENSRNOG00000001953
489	ENSRNOT00000002684	-0.179193	5.12695	0.604903	0.436714	0.999516	Ift57	ENSRNOG00000001958
490	ENSRNOT00000002700	-0.519218	1.42042	1.62078	0.202983	0.999516	Bbx	ENSRNOG00000001971
491	ENSRNOT00000002715	0.13922	4.90591	0.357318	0.549999	0.999516	Rcan1	ENSRNOG00000001979
492	ENSRNOT00000002719	-0.392687	0.904538	1.00619	0.315819	0.999516	Cblb	ENSRNOG00000001982
493	ENSRNOT00000002727	-0.0564948	7.82671	0.0744977	0.784897	0.999516	Atp6v1a	ENSRNOG00000001992
494	ENSRNOT00000002732	-0.00787553	7.61856	0.00125476	0.971743	0.999516	Atp5po	ENSRNOG00000001991
495	ENSRNOT00000002746	-0.295778	4.85128	1.589	0.207469	0.999516	Prdm8	ENSRNOG00000002004
496	ENSRNOT00000002775	0.157772	6.5231	0.599645	0.438714	0.999516	Tmem50b	ENSRNOG00000002028
497	ENSRNOT00000002779	-0.166932	4.82581	0.454886	0.500024	0.999516	Ifngr2	ENSRNOG00000002032
498	ENSRNOT00000002790	0.134536	5.11036	0.349185	0.554575	0.999516	Boc	ENSRNOG00000002041
499	ENSRNOT00000002797	-0.149145	2.41384	0.17138	0.678888	0.999516	Gtpbp8	ENSRNOG00000002044
500	ENSRNOT00000002800	0.152159	4.9685	0.409288	0.522331	0.999516	Paxbp1	ENSRNOG00000002036
501	ENSRNOT00000002809	0.0647205	6.94005	0.0894252	0.764909	0.999516	Igfbp7	ENSRNOG00000002050
502	ENSRNOT00000002827	-0.182296	5.99634	0.808349	0.368609	0.999516	Olig1	ENSRNOG00000028648
503	ENSRNOT00000002834	0.000963834	3.71416	1.06318e-05	0.997398	0.999516	Mrpl1	ENSRNOG00000002070
504	ENSRNOT00000002843	-0.295934	2.18377	0.683716	0.40831	0.999516	Cnot6l	ENSRNOG00000002075
505	ENSRNOT00000002862	-0.230744	6.27883	1.22674	0.268043	0.999516	LOC108348180	ENSRNOG00000002100
506	ENSRNOT00000002864	-0.083631	2.56295	0.0512445	0.820912	0.999516	Gtf3c3	ENSRNOG00000002091
507	ENSRNOT00000002866	0.688805	1.62252	2.34898	0.125365	0.999516	Hunk	ENSRNOG00000002092
508	ENSRNOT00000002867	0.146516	0.80985	0.0990462	0.752977	0.999516	Tgfbr3	ENSRNOG00000002093
509	ENSRNOT00000002869	0.230886	5.36323	1.09872	0.294547	0.999516	Rasl11b	ENSRNOG00000002097
510	ENSRNOT00000002872	0.119222	2.54127	0.116541	0.732817	0.999516	Fastkd2	ENSRNOG00000023923
511	ENSRNOT00000002876	0.105491	4.59631	0.176914	0.674039	0.999516	Ccng2	ENSRNOG00000002089
512	ENSRNOT00000002879	-1.15942	1.93812	2.04804	0.152403	0.999516	Usp46	ENSRNOG00000002106
513	ENSRNOT00000002882	0.242224	4.06846	0.604463	0.43688	0.999516	Zfp644	ENSRNOG00000002112
514	ENSRNOT00000002883	0.136636	2.46551	0.13123	0.71716	0.999516	Fam114a1	ENSRNOG00000026504
515	ENSRNOT00000002885	0.0245867	7.15152	0.0125074	0.910953	0.999516	Sod1	ENSRNOG00000002115
516	ENSRNOT00000002897	0.0829225	1.99707	0.0365739	0.848335	0.999516	Lrrc8b	ENSRNOG00000002129
517	ENSRNOT00000002905	0.0209556	4.09985	0.00615847	0.937449	0.999516	Ppat	ENSRNOG00000002128
518	ENSRNOT00000002906	-0.0383165	4.6422	0.0220836	0.881865	0.999516	Atg3	ENSRNOG00000002094
519	ENSRNOT00000002907	0.053153	3.78973	0.0357161	0.850103	0.999516	Aasdh	ENSRNOG00000002137
520	ENSRNOT00000002908	-0.210132	5.30761	0.846802	0.357459	0.999516	Cracd	ENSRNOG00000002139
521	ENSRNOT00000002916	0.0731201	3.97522	0.0672959	0.795315	0.999516	Pkd2	ENSRNOG00000002146
522	ENSRNOT00000002918	0.152859	5.64412	0.485366	0.486002	0.999516	Cds1	ENSRNOG00000002142
523	ENSRNOT00000002921	-0.135486	5.14496	0.363042	0.546822	0.999516	Sgcb	ENSRNOG00000002135
524	ENSRNOT00000002924	0.0632897	7.8735	0.106771	0.743851	0.999516	Ccni	ENSRNOG00000002125
525	ENSRNOT00000002936	0.319669	2.84664	0.819396	0.365357	0.999516	Gpat3	ENSRNOG00000002159
526	ENSRNOT00000002942	-0.398523	4.94127	2.58568	0.107834	0.999516	Tagln3	ENSRNOG00000064186
527	ENSRNOT00000002957	-0.199734	1.04717	0.256944	0.612228	0.999516	Nectin3	ENSRNOG00000002176
528	ENSRNOT00000002960	-0.0943861	4.25134	0.13356	0.714769	0.999516	Klf3	ENSRNOG00000002163
529	ENSRNOT00000002962	-0.358044	3.59497	1.32137	0.250346	0.999516	Mrps18c	ENSRNOG00000002178
530	ENSRNOT00000002969	0.025402	1.30447	0.00367918	0.951633	0.999516	Stard6	ENSRNOG00000026324
531	ENSRNOT00000002973	0.0798519	5.86935	0.133814	0.71451	0.999516	Nudt9	ENSRNOG00000002186
532	ENSRNOT00000002977	0.0096598	3.75611	0.00115864	0.972846	0.999516	Pgm2	ENSRNOG00000002185
533	ENSRNOT00000002982	0.0875602	2.25001	0.0617707	0.803719	0.999516	LOC498368	ENSRNOG00000002191
534	ENSRNOT00000002983	-0.164261	1.02584	0.197226	0.656969	0.999516	Hpse	ENSRNOG00000002188
535	ENSRNOT00000002987	-0.0797762	4.09405	0.0861883	0.76908	0.999516	Coq2	ENSRNOG00000002194
536	ENSRNOT00000002990	-0.127787	1.32182	0.0999362	0.751906	0.999516	LOC100363472	ENSRNOG00000002200
537	ENSRNOT00000002992	-0.0834987	3.0225	0.0640175	0.800255	0.999516	Gnpda2	ENSRNOG00000002177
538	ENSRNOT00000002996	-0.23609	6.21921	1.22874	0.267651	0.999516	Ociad1	ENSRNOG00000002205
539	ENSRNOT00000003004	-0.0101893	4.29086	0.00154967	0.968599	0.999516	Hsd17b11	ENSRNOG00000002210
540	ENSRNOT00000003009	-0.124981	0.0917218	0.098627	0.753484	0.999516	Ccdc158	ENSRNOG00000002204
541	ENSRNOT00000003010	0.0112932	4.19767	0.00195744	0.964711	0.999516	Tmem165	ENSRNOG00000002199
542	ENSRNOT00000003012	-0.170129	1.65315	0.149345	0.699162	0.999516	Plac8	ENSRNOG00000002217
543	ENSRNOT00000003013	-0.31159	3.536	1.11211	0.291623	0.999516	Hacd2	ENSRNOG00000038761
544	ENSRNOT00000003017	0.212041	3.53741	0.516507	0.472336	0.999516	Guf1	ENSRNOG00000002207
545	ENSRNOT00000003020	0.396602	1.51978	0.832057	0.361678	0.999516	Stbd1	ENSRNOG00000002218
546	ENSRNOT00000003021	0.0252452	3.12503	0.00602626	0.938123	0.999516	Srd5a3	ENSRNOG00000002216
547	ENSRNOT00000003026	0.0897275	4.27696	0.106673	0.743964	0.999516	Klhl8	ENSRNOG00000002214
548	ENSRNOT00000003046	0.0819813	5.97344	0.151805	0.696817	0.999516	Cops4	ENSRNOG00000023650
549	ENSRNOT00000003048	-0.198405	5.1449	0.739543	0.389807	0.999516	Slc49a4	ENSRNOG00000002240
550	ENSRNOT00000003060	0.0393019	2.64254	0.0131699	0.908635	0.999516	Hspbap1	ENSRNOG00000002241
551	ENSRNOT00000003068	-0.0476408	1.165	0.0153721	0.901328	0.999516	Wdr5b	ENSRNOG00000002253
552	ENSRNOT00000003076	-0.199188	5.68948	0.902685	0.342063	0.999516	Tmem150c	ENSRNOG00000002258
553	ENSRNOT00000003077	-0.745014	2.69904	1.34827	0.245581	0.999516	Pdgfra	ENSRNOG00000002244
554	ENSRNOT00000003083	-0.336621	5.16992	1.42007	0.233391	0.999516	Enoph1	ENSRNOG00000002262
555	ENSRNOT00000003085	0.13973	2.45741	0.164223	0.685298	0.999516	Chic2	ENSRNOG00000002267
556	ENSRNOT00000003087	-0.0139952	2.1976	0.000465046	0.982795	0.999516	Slain2	ENSRNOG00000002271
557	ENSRNOT00000003088	-0.0161599	2.8148	0.00196452	0.964647	0.999516	Lnx1	ENSRNOG00000002272
558	ENSRNOT00000003102	-0.310833	3.07864	0.827476	0.363004	0.999516	Naaa	ENSRNOG00000002273
559	ENSRNOT00000003106	0.0839482	5.94724	0.16849	0.681457	0.999516	Hnrnpdl	ENSRNOG00000002270
560	ENSRNOT00000003146	0.636072	1.02323	2.51354	0.112872	0.999516	Atp10d	ENSRNOG00000002312
561	ENSRNOT00000003158	-0.284945	5.47517	1.59804	0.206182	0.999516	Hnrnpd	ENSRNOG00000002292
562	ENSRNOT00000003170	-0.238861	3.26673	0.522042	0.469972	0.999516	Gabrb1	ENSRNOG00000002327
563	ENSRNOT00000003173	0.251746	5.00623	0.47712	0.48973	0.999516	Hnrnpd	ENSRNOG00000002292
564	ENSRNOT00000003177	0.344325	3.54023	1.31253	0.251937	0.999516	RGD1310587	ENSRNOG00000002322
565	ENSRNOT00000003179	-0.0517941	3.13695	0.0273826	0.868569	0.999516	Dgke	ENSRNOG00000002338
566	ENSRNOT00000003188	0.0383605	1.28057	0.0103027	0.919152	0.999516	Chmp1b2	ENSRNOG00000002323
567	ENSRNOT00000003191	0.0193459	2.67071	0.00156972	0.968396	0.999516	Gabra4	ENSRNOG00000002336
568	ENSRNOT00000003198	-0.664849	2.34992	2.87151	0.0901601	0.999516	Mark1	ENSRNOG00000002339
569	ENSRNOT00000003216	0.140741	5.1428	0.297823	0.585251	0.999516	Rab3gap2	ENSRNOG00000002353
570	ENSRNOT00000003219	-0.160059	4.79945	0.369912	0.543052	0.999516	Scpep1	ENSRNOG00000002358
571	ENSRNOT00000003228	0.0687259	7.88334	0.0948387	0.758114	0.999516	Rnf112	ENSRNOG00000002364
572	ENSRNOT00000003237	-0.183341	1.18755	0.180594	0.670863	0.999516	Prkg2	ENSRNOG00000002361
573	ENSRNOT00000003239	0.129725	2.64037	0.129592	0.718855	0.999516	Rgs8	ENSRNOG00000002369
574	ENSRNOT00000003246	0.275132	5.09591	1.25671	0.262276	0.999516	Trim41	ENSRNOG00000002388
575	ENSRNOT00000003248	0.809699	9.04661	1.05622	0.304079	0.999516	Uchl1	ENSRNOG00000002343
576	ENSRNOT00000003255	0.315156	5.05025	1.02886	0.310427	0.999516	Golgb1	ENSRNOG00000030314
577	ENSRNOT00000003265	0.33856	5.41888	1.87535	0.170864	0.999516	Itm2a	ENSRNOG00000002365
578	ENSRNOT00000003268	0.455783	2.69256	1.58987	0.207345	0.999516	Mfap4	ENSRNOG00000045683
579	ENSRNOT00000003280	0.0203635	1.97209	0.00285858	0.957361	0.999516	Tfcp2l1	ENSRNOG00000002414
580	ENSRNOT00000003282	0.262041	3.35925	0.726063	0.394162	0.999516	Gpc4	ENSRNOG00000002413
581	ENSRNOT00000003283	0.164761	8.9208	0.436834	0.508654	0.999516	Plp1	ENSRNOG00000002419
582	ENSRNOT00000003284	0.0203462	3.19496	0.00374391	0.95121	0.999516	Pdxdc1	ENSRNOG00000002407
583	ENSRNOT00000003286	-0.258791	0.606436	0.433213	0.510417	0.999516	Lpar4	ENSRNOG00000002428
584	ENSRNOT00000003308	0.171659	7.33639	0.719549	0.396292	0.999516	Mmd	ENSRNOG00000002436
585	ENSRNOT00000003309	0.0176778	4.77406	0.0051832	0.942606	0.999516	Zc3h7a	ENSRNOG00000002420
586	ENSRNOT00000003313	-0.299729	4.67711	1.21943	0.269472	0.999516	Tgfb2	ENSRNOG00000002418
587	ENSRNOT00000003320	0.17559	0.661114	0.169513	0.680545	0.999516	Niban1	ENSRNOG00000002403
588	ENSRNOT00000003326	-0.0211877	1.41639	0.00293211	0.956817	0.999516	Hcls1	ENSRNOG00000038881
589	ENSRNOT00000003339	0.0563329	3.55923	0.03549	0.850573	0.999516	Trim7	ENSRNOG00000002469
590	ENSRNOT00000003343	-0.141409	0.185132	0.103321	0.74788	0.999516	Ifi47	ENSRNOG00000002470
591	ENSRNOT00000003346	0.189132	0.68591	0.152529	0.69613	0.999516	G3bp2	ENSRNOG00000002433
592	ENSRNOT00000003349	0.0878594	2.70687	0.0633888	0.801218	0.999516	Nid1	ENSRNOG00000002461
593	ENSRNOT00000003359	-0.171181	4.22457	0.374299	0.54067	0.999516	Rrp15	ENSRNOG00000002450
594	ENSRNOT00000003361	-0.0274222	3.27414	0.00651272	0.935679	0.999516	Mfap3	ENSRNOG00000002443
595	ENSRNOT00000003369	0.185622	1.9431	0.155018	0.693785	0.999516	Tom1l1	ENSRNOG00000002474
596	ENSRNOT00000003391	0.0235425	1.46343	0.00304772	0.955974	0.999516	Insig2	ENSRNOG00000002478
597	ENSRNOT00000003397	-0.104783	6.36131	0.251859	0.615769	0.999516	Gnl3l	ENSRNOG00000002509
598	ENSRNOT00000003402	0.160125	3.01821	0.191504	0.661668	0.999516	B9d1	ENSRNOG00000002462
599	ENSRNOT00000003407	-0.0518924	2.8109	0.0232032	0.87893	0.999516	Tnr	ENSRNOG00000002468
600	ENSRNOT00000003412	0.258305	2.81862	0.48774	0.484937	0.999516	Litaf	ENSRNOG00000002520
601	ENSRNOT00000003413	0.155434	4.18849	0.353665	0.552046	0.999516	Ralb	ENSRNOG00000002440
602	ENSRNOT00000003414	0.299449	1.86344	0.489368	0.48421	0.999516	Rap2c	ENSRNOG00000002529
603	ENSRNOT00000003435	-0.0801308	2.19297	0.0517552	0.820037	0.999516	Ccdc93	ENSRNOG00000002514
604	ENSRNOT00000003437	-0.11929	1.83006	0.0879996	0.766736	0.999516	Pds5a	ENSRNOG00000002541
605	ENSRNOT00000003439	0.0614671	5.32701	0.0772107	0.781114	0.999516	Hapstr1	ENSRNOG00000002545
606	ENSRNOT00000003447	0.238666	1.54301	0.376451	0.539509	0.999516	Galnt10	ENSRNOG00000002488
607	ENSRNOT00000003458	-0.522366	0.182123	1.60429	0.205297	0.999516	Socs1	ENSRNOG00000002568
608	ENSRNOT00000003460	0.0217238	4.60288	0.00754971	0.93076	0.999516	Mrps14	ENSRNOG00000002569
609	ENSRNOT00000003465	0.0790625	0.972452	0.0448194	0.832336	0.999516	Tekt5	ENSRNOG00000002571
610	ENSRNOT00000003470	-0.131609	2.95566	0.119879	0.729166	0.999516	Rchy1	ENSRNOG00000002546
611	ENSRNOT00000003472	-0.253319	2.97371	0.448518	0.50304	0.999516	Parm1	ENSRNOG00000002579
612	ENSRNOT00000003473	-0.139795	4.74009	0.304014	0.581377	0.999516	Sap30l	ENSRNOG00000002575
613	ENSRNOT00000003489	-0.353966	0.419104	0.510485	0.474929	0.999516	Esrrg	ENSRNOG00000002593
614	ENSRNOT00000003492	-0.0013418	2.59644	1.5784e-05	0.99683	0.999516	Heatr6	ENSRNOG00000002542
615	ENSRNOT00000003494	-0.0475902	4.7557	0.0352507	0.851071	0.999516	Taf1	ENSRNOG00000002565
616	ENSRNOT00000003511	-0.0319867	5.06638	0.0154452	0.901094	0.999516	Sox9	ENSRNOG00000002607
617	ENSRNOT00000003514	0.0732368	3.6873	0.0596138	0.807107	0.999516	Carhsp1	ENSRNOG00000002610
618	ENSRNOT00000003515	0.171396	1.04255	0.200543	0.654283	0.999516	Grap	ENSRNOG00000002599
619	ENSRNOT00000003517	-0.00574006	3.15501	0.000302726	0.986118	0.999516	Trmt1l	ENSRNOG00000002580
620	ENSRNOT00000003527	-0.237786	5.24081	1.00693	0.315639	0.999516	Dpp10	ENSRNOG00000002595
621	ENSRNOT00000003544	-0.0931006	4.78775	0.150722	0.697846	0.999516	Dexi	ENSRNOG00000002635
622	ENSRNOT00000003550	-0.00623271	7.23214	0.000744417	0.978233	0.999516	Naca	ENSRNOG00000002632
623	ENSRNOT00000003551	0.247232	2.35015	0.452232	0.501277	0.999516	Scyl3	ENSRNOG00000025318
624	ENSRNOT00000003555	0.184315	5.85278	0.837356	0.360154	0.999516	Cnot8	ENSRNOG00000002630
625	ENSRNOT00000003556	0.139107	5.19094	0.373086	0.541327	0.999516	Kctd3	ENSRNOG00000002627
626	ENSRNOT00000003557	0.177907	3.87219	0.328433	0.566583	0.999516	LOC100361993	ENSRNOG00000022144
627	ENSRNOT00000003558	-0.344138	4.53981	1.08918	0.296652	0.999516	Ivns1abp	ENSRNOG00000002618
628	ENSRNOT00000003567	-0.101165	5.00399	0.145391	0.702979	0.999516	Ptgs2	ENSRNOG00000002525
629	ENSRNOT00000003568	-0.140373	1.34811	0.104352	0.746669	0.999516	Ptpn4	ENSRNOG00000002625
630	ENSRNOT00000003573	0.0985298	6.01112	0.212834	0.644555	0.999516	Magee1	ENSRNOG00000002660
631	ENSRNOT00000003586	-0.185069	6.41067	0.782588	0.376351	0.999516	Cacybp	ENSRNOG00000002572
632	ENSRNOT00000003593	0.112536	4.55825	0.17679	0.674147	0.999516	Gpr37	ENSRNOG00000002524
633	ENSRNOT00000003600	-0.30332	2.63557	0.769881	0.380254	0.999516	Ddx52	ENSRNOG00000002612
634	ENSRNOT00000003605	0.370458	4.57702	2.04872	0.152334	0.999516	Lamc1	ENSRNOG00000002680
635	ENSRNOT00000003611	0.0960901	7.55842	0.16845	0.681493	0.999516	Nme2	ENSRNOG00000002671
636	ENSRNOT00000003615	0.348578	1.09282	0.768168	0.380784	0.999516	Emp2	ENSRNOG00000002664
637	ENSRNOT00000003618	0.0477035	4.36474	0.0354304	0.850697	0.999516	Tfb2m	ENSRNOG00000002695
638	ENSRNOT00000003633	0.0492025	3.47786	0.0281192	0.866829	0.999516	Abat	ENSRNOG00000002636
639	ENSRNOT00000003636	0.0492473	0.898038	0.0177747	0.893939	0.999516	Mettl18	ENSRNOG00000025189
640	ENSRNOT00000003641	0.219691	4.6767	0.716697	0.397229	0.999516	Cnst	ENSRNOG00000002710
641	ENSRNOT00000003658	-0.603404	3.42264	3.73107	0.0534092	0.999516	Nme1	ENSRNOG00000002693
642	ENSRNOT00000003674	-0.257319	6.95041	1.37765	0.240502	0.999516	Ndufb4	ENSRNOG00000002721
643	ENSRNOT00000003684	0.202575	3.8472	0.507642	0.476161	0.999516	Kcnk2	ENSRNOG00000002653
644	ENSRNOT00000003685	-0.173563	3.25945	0.313723	0.575405	0.999516	Ccdc43	ENSRNOG00000002748
645	ENSRNOT00000003687	0.0559164	5.96797	0.064406	0.799663	0.999516	Cluh	ENSRNOG00000002669
646	ENSRNOT00000003689	-0.518845	0.388324	1.38291	0.239606	0.999516	Rc3h1	ENSRNOG00000002750
647	ENSRNOT00000003690	-0.125754	6.1061	0.404078	0.524991	0.999516	Sec14l1	ENSRNOG00000002722
648	ENSRNOT00000003691	0.151883	3.21916	0.228351	0.632749	0.999516	Ugdh	ENSRNOG00000002643
649	ENSRNOT00000003696	-0.0421728	6.47349	0.0230658	0.879286	0.999516	Pafah1b1	ENSRNOG00000002755
650	ENSRNOT00000003697	-0.0646361	5.28648	0.0829143	0.773386	0.999516	Prpsap2	ENSRNOG00000002724
651	ENSRNOT00000003700	-0.241992	4.28975	0.873225	0.350064	0.999516	Mettl22	ENSRNOG00000002714
652	ENSRNOT00000003715	0.229945	4.25667	0.782387	0.376412	0.999516	Vps4b	ENSRNOG00000002705
653	ENSRNOT00000003728	-0.352135	1.97265	0.804536	0.369741	0.999516	Kdsr	ENSRNOG00000002781
654	ENSRNOT00000003749	0.238751	2.25388	0.350463	0.553851	0.999516	Tmem114	ENSRNOG00000002768
655	ENSRNOT00000003750	-0.0585116	3.86263	0.0456708	0.830775	0.999516	Mettl16	ENSRNOG00000002764
656	ENSRNOT00000003762	-0.185053	4.14346	0.47105	0.492504	0.999516	Mri1	ENSRNOG00000026211
657	ENSRNOT00000003770	-0.0568011	1.976	0.0185761	0.891589	0.999516	Gfpt2	ENSRNOG00000002810
658	ENSRNOT00000003772	0.469223	1.50491	1.45295	0.228055	0.999516	Gdpd2	ENSRNOG00000002800
659	ENSRNOT00000003774	0.437381	5.86536	1.63517	0.200989	0.999516	Rgs4	ENSRNOG00000002773
660	ENSRNOT00000003777	-0.428903	3.52621	1.42854	0.232004	0.999516	Spag9	ENSRNOG00000002749
661	ENSRNOT00000003779	0.00755492	4.19665	0.00083329	0.976971	0.999516	Lias	ENSRNOG00000002759
662	ENSRNOT00000003782	-0.280524	1.46503	0.529906	0.466646	0.999516	Rlim	ENSRNOG00000045695
663	ENSRNOT00000003787	0.0755463	6.14965	0.144896	0.703461	0.999516	Ptges3	ENSRNOG00000002642
664	ENSRNOT00000003788	-0.325333	2.79413	0.805915	0.369331	0.999516	Brinp3	ENSRNOG00000002811
665	ENSRNOT00000003791	0.377482	5.97772	3.5447	0.0597359	0.999516	Sccpdh	ENSRNOG00000066712
666	ENSRNOT00000003800	-0.147718	1.47616	0.102132	0.749286	0.999516	Usp27x	ENSRNOG00000002844
667	ENSRNOT00000003804	-0.0530335	4.04563	0.0364641	0.84856	0.999516	Cog1	ENSRNOG00000002795
668	ENSRNOT00000003834	-0.111111	4.96908	0.117508	0.731754	0.999516	Rbm25	ENSRNOG00000002874
669	ENSRNOT00000003840	-0.153511	5.22331	0.45635	0.499335	0.999516	Phlpp1	ENSRNOG00000002821
670	ENSRNOT00000003841	-0.354278	0.724721	0.605861	0.43635	0.999516	Cfap144	ENSRNOG00000002873
671	ENSRNOT00000003844	-0.110026	5.2066	0.228105	0.632933	0.999516	Ccdc181	ENSRNOG00000002860
672	ENSRNOT00000003857	0.490761	0.254208	1.22521	0.268341	0.999516	Slc9c2	ENSRNOG00000002890
673	ENSRNOT00000003859	-0.308879	1.97452	0.490261	0.483811	0.999516	Ppm1e	ENSRNOG00000024730
674	ENSRNOT00000003867	-0.517812	2.20907	1.94882	0.162714	0.999516	Gsk3b	ENSRNOG00000002833
675	ENSRNOT00000003878	0.0700964	4.58447	0.0762184	0.782489	0.999516	Slc35a4	ENSRNOG00000002908
676	ENSRNOT00000003886	0.0307334	1.59494	0.00630366	0.936718	0.999516	Myo19	ENSRNOG00000002852
677	ENSRNOT00000003888	0.0788893	3.35497	0.0651283	0.798567	0.999516	Nagpa	ENSRNOG00000002895
678	ENSRNOT00000003891	0.194239	5.96952	0.919605	0.337579	0.999516	Septin9	ENSRNOG00000002807
679	ENSRNOT00000003907	0.00898221	4.84915	0.0014552	0.96957	0.999516	Rfc1	ENSRNOG00000002855
680	ENSRNOT00000003908	0.0831992	2.47979	0.0494655	0.823996	0.999516	Car4	ENSRNOG00000002916
681	ENSRNOT00000003914	-0.0502823	6.3631	0.00936749	0.922897	0.999516	Luc7l3	ENSRNOG00000002835
682	ENSRNOT00000003921	-0.508706	0.786691	1.61348	0.204004	0.999516	Alb	ENSRNOG00000002911
683	ENSRNOT00000003926	0.328652	7.25963	1.83923	0.175041	0.999516	Guk1	ENSRNOG00000002928
684	ENSRNOT00000003931	0.0297459	4.64487	0.0111383	0.915949	0.999516	Mrpl55	ENSRNOG00000002943
685	ENSRNOT00000003932	-0.355231	8.04182	1.43447	0.231037	0.999516	Atp1b1	ENSRNOG00000002934
686	ENSRNOT00000003941	-0.16604	4.74004	0.344031	0.557512	0.999516	Trmt1	ENSRNOG00000002914
687	ENSRNOT00000003950	0.253902	2.35524	0.322112	0.570341	0.999516	Uhmk1	ENSRNOG00000002941
688	ENSRNOT00000003965	0.102515	9.74575	0.28955	0.590509	0.999516	Atp5f1b	ENSRNOG00000002840
689	ENSRNOT00000003966	-0.261298	1.74556	0.518662	0.471413	0.999516	Adora2b	ENSRNOG00000002922
690	ENSRNOT00000003980	0.410218	1.16497	1.08848	0.296809	0.999516	Lyl1	ENSRNOG00000002950
691	ENSRNOT00000003984	0.00624233	3.3258	0.00038559	0.984333	0.999516	Ndp	ENSRNOG00000002960
692	ENSRNOT00000003986	-0.297037	3.82001	1.01254	0.314294	0.999516	C1ql1	ENSRNOG00000002963
693	ENSRNOT00000003992	0.312553	3.6244	1.02028	0.312453	0.999516	Tsr1	ENSRNOG00000002980
694	ENSRNOT00000004001	0.00359268	5.02371	0.000232652	0.98783	0.999516	Fam104a	ENSRNOG00000002851
695	ENSRNOT00000004003	-0.0864078	2.44543	0.0494656	0.823996	0.999516	Klhl5	ENSRNOG00000008421
696	ENSRNOT00000004006	-0.0455094	2.41266	0.0124837	0.911037	0.999516	Stim2	ENSRNOG00000002956
697	ENSRNOT00000004007	0.182928	5.50328	0.716654	0.397244	0.999516	Pgs1	ENSRNOG00000002949
698	ENSRNOT00000004010	-0.356157	3.55675	0.81753	0.365903	0.999516	Mapk9	ENSRNOG00000002823
699	ENSRNOT00000004011	-0.00639234	4.74473	0.000561935	0.981088	0.999516	C10h1orf35	ENSRNOG00000002944
700	ENSRNOT00000004023	-0.0197439	4.58181	0.00624915	0.936992	0.999516	Timmdc1	ENSRNOG00000002999
701	ENSRNOT00000004027	-0.0914774	6.53405	0.143404	0.70492	0.999516	Gadd45gip1	ENSRNOG00000003011
702	ENSRNOT00000004032	-0.488468	1.78813	1.80044	0.179659	0.999516	Itpkb	ENSRNOG00000002969
703	ENSRNOT00000004038	0.126156	5.12707	0.264185	0.607259	0.999516	AABR07039336.2	ENSRNOG00000003025
704	ENSRNOT00000004042	-0.413412	4.42568	2.5475	0.110469	0.999516	Rad23a	ENSRNOG00000003026
705	ENSRNOT00000004046	-0.241037	6.84633	0.854364	0.355321	0.999516	Nmt1	ENSRNOG00000002989
706	ENSRNOT00000004047	0.329445	1.43093	0.714472	0.397963	0.999516	Dnah17	ENSRNOG00000003028
707	ENSRNOT00000004058	-0.261747	3.58049	0.810363	0.368013	0.999516	Smg6	ENSRNOG00000003041
708	ENSRNOT00000004074	0.229059	3.48701	0.632814	0.426325	0.999516	Cox18	ENSRNOG00000003052
709	ENSRNOT00000004081	0.119893	3.5414	0.153195	0.6955	0.999516	Ttyh2	ENSRNOG00000024578
710	ENSRNOT00000004083	-0.0227807	4.3962	0.00810734	0.928255	0.999516	Tiprl	ENSRNOG00000003048
711	ENSRNOT00000004091	-0.0308745	8.39464	0.0229399	0.879613	0.999516	Calr	ENSRNOG00000003029
712	ENSRNOT00000004094	0.0538323	0.233981	0.0143544	0.904634	0.999516	Bst1	ENSRNOG00000003064
713	ENSRNOT00000004113	-0.177784	2.4771	0.248419	0.61819	0.999516	Pigl	ENSRNOG00000003070
714	ENSRNOT00000004117	0.233425	2.33843	0.44014	0.507055	0.999516	Olfml2b	ENSRNOG00000003018
715	ENSRNOT00000004127	-0.155097	4.87226	0.396365	0.528973	0.999516	Cenpv	ENSRNOG00000003086
716	ENSRNOT00000004138	-0.281015	1.35173	0.398877	0.52767	0.999516	Arhgap31	ENSRNOG00000003088
717	ENSRNOT00000004140	0.522636	3.33403	2.62802	0.104993	0.999516	Plcd3	ENSRNOG00000003033
718	ENSRNOT00000004141	0.111235	1.84088	0.0759027	0.782929	0.999516	Kif19	ENSRNOG00000003105
719	ENSRNOT00000004163	-0.0248671	5.3799	0.0131927	0.908556	0.999516	Acbd4	ENSRNOG00000003108
720	ENSRNOT00000004172	0.123172	5.28225	0.241109	0.623406	0.999516	Nherf2	ENSRNOG00000002997
721	ENSRNOT00000004173	-0.0665158	2.86207	0.038872	0.843702	0.999516	Spryd4	ENSRNOG00000003127
722	ENSRNOT00000004176	-0.0419979	6.26775	0.0411348	0.839278	0.999516	Rogdi	ENSRNOG00000003125
723	ENSRNOT00000004179	-0.0380283	2.1643	0.00946755	0.922487	0.999516	Dusp12	ENSRNOG00000003100
724	ENSRNOT00000004184	0.206541	0.903673	0.302472	0.582337	0.999516	Ribc1	ENSRNOG00000003081
725	ENSRNOT00000004191	0.190027	4.05894	0.474182	0.49107	0.999516	Btbd17	ENSRNOG00000003109
726	ENSRNOT00000004192	0.00269707	3.61975	8.68882e-05	0.992563	0.999516	Traf7	ENSRNOG00000003131
727	ENSRNOT00000004196	0.274859	4.70667	0.859329	0.353927	0.999516	Cyth1	ENSRNOG00000043381
728	ENSRNOT00000004206	0.0212049	6.3188	0.0089208	0.924752	0.999516	Mpc2	ENSRNOG00000003150
729	ENSRNOT00000004217	0.176952	0.985772	0.196819	0.657301	0.999516	Bfar	ENSRNOG00000003151
730	ENSRNOT00000004218	-0.0487382	3.47108	0.0257124	0.872605	0.999516	Hexim2	ENSRNOG00000021287
731	ENSRNOT00000004224	-0.0229729	3.32035	0.00548219	0.940977	0.999516	Hdac8	ENSRNOG00000003122
732	ENSRNOT00000004228	0.0229974	5.02549	0.00786729	0.929322	0.999516	Sdhc	ENSRNOG00000003163
733	ENSRNOT00000004231	0.318337	3.68983	0.889264	0.345677	0.999516	Prom1	ENSRNOG00000003098
734	ENSRNOT00000004232	-0.00704826	5.24785	0.000940353	0.975537	0.999516	Parp1	ENSRNOG00000003084
735	ENSRNOT00000004235	-0.0886959	1.86238	0.0351975	0.851182	0.999516	RragB	ENSRNOG00000062421
736	ENSRNOT00000004238	0.041224	4.42088	0.0266136	0.870411	0.999516	Mageh1	ENSRNOG00000003178
737	ENSRNOT00000004241	0.041808	2.36646	0.0125798	0.910697	0.999516	Prelp	ENSRNOG00000003120
738	ENSRNOT00000004248	0.0317925	4.24551	0.0126081	0.910597	0.999516	Trpv2	ENSRNOG00000003104
739	ENSRNOT00000004249	-0.253738	5.70422	0.816862	0.366099	0.999516	Rab26	ENSRNOG00000042086
740	ENSRNOT00000004252	0.187422	4.07109	0.323593	0.569456	0.999516	Armcx5	ENSRNOG00000003187
741	ENSRNOT00000004260	-0.117233	6.25972	0.333228	0.563764	0.999516	Gprasp2	ENSRNOG00000037658
742	ENSRNOT00000004269	-0.0210212	4.0198	0.00187343	0.965476	0.999516	Mat2b	ENSRNOG00000003177
743	ENSRNOT00000004272	-0.0239338	5.74256	0.013572	0.907257	0.999516	Hexim1	ENSRNOG00000003203
744	ENSRNOT00000004283	-0.342654	5.18706	0.681664	0.409014	0.999516	Psmd12	ENSRNOG00000003117
745	ENSRNOT00000004289	0.0678812	2.99379	0.0386491	0.844145	0.999516	B4galt4	ENSRNOG00000003114
746	ENSRNOT00000004290	0.186121	6.04558	0.723549	0.394982	0.999516	Timp2	ENSRNOG00000033143
747	ENSRNOT00000004291	0.090787	3.16227	0.074218	0.785292	0.999516	Zfp287	ENSRNOG00000003215
748	ENSRNOT00000004293	-0.413042	3.92028	2.1815	0.139679	0.999516	Acbd3	ENSRNOG00000003185
749	ENSRNOT00000004294	-0.113131	2.79292	0.107799	0.742664	0.999516	Zfp286a	ENSRNOG00000003218
750	ENSRNOT00000004297	-0.238661	4.46216	0.825384	0.363611	0.999516	Srp9	ENSRNOG00000003211
751	ENSRNOT00000004298	-0.0134733	3.25101	0.00172925	0.96683	0.999516	Anks3	ENSRNOG00000003186
752	ENSRNOT00000004305	0.268858	4.78808	1.22431	0.268516	0.999516	Mid1ip1	ENSRNOG00000003228
753	ENSRNOT00000004308	-0.0626196	8.17939	0.0868822	0.768179	0.999516	Sqstm1	ENSRNOG00000003147
754	ENSRNOT00000004313	0.245712	3.09657	0.364096	0.54624	0.999516	Serpinf1	ENSRNOG00000003172
755	ENSRNOT00000004319	-0.0275752	5.52818	0.0159779	0.899412	0.999516	Degs1	ENSRNOG00000003223
756	ENSRNOT00000004322	0.199124	0.685073	0.219124	0.639708	0.999516	Serpinf2	ENSRNOG00000003233
757	ENSRNOT00000004323	0.122868	2.67613	0.0728505	0.787231	0.999516	Mgat4b	ENSRNOG00000003235
758	ENSRNOT00000004329	-0.0241311	7.3523	0.0136129	0.907118	0.999516	H3f3b	ENSRNOG00000003220
759	ENSRNOT00000004330	0.00688869	4.61089	0.000743867	0.978241	0.999516	Tp53bp2	ENSRNOG00000003237
760	ENSRNOT00000004342	0.0206152	4.61362	0.00636565	0.936408	0.999516	B3galt2	ENSRNOG00000003251
761	ENSRNOT00000004346	-0.125476	7.81398	0.360203	0.548393	0.999516	Bmerb1	ENSRNOG00000003198
762	ENSRNOT00000004350	0.187906	4.12039	0.429934	0.512022	0.999516	Sde2	ENSRNOG00000003247
763	ENSRNOT00000004351	0.0983516	4.48373	0.14854	0.699935	0.999516	Nherf1	ENSRNOG00000003232
764	ENSRNOT00000004356	-0.184723	1.81544	0.225635	0.63478	0.999516	Efcab15	ENSRNOG00000003266
765	ENSRNOT00000004359	0.108431	-0.170983	0.0634981	0.80105	0.999516	Ltc4s	ENSRNOG00000003244
766	ENSRNOT00000004361	0.133315	2.34964	0.110824	0.739207	0.999516	Maml1	ENSRNOG00000003268
767	ENSRNOT00000004363	-0.184316	0.372842	0.214317	0.643405	0.999516	Il23a	ENSRNOG00000003254
768	ENSRNOT00000004364	-0.125874	6.23385	0.394547	0.529919	0.999516	Smc1a	ENSRNOG00000003139
769	ENSRNOT00000004365	0.213033	4.38246	0.636006	0.425161	0.999516	Wdr81	ENSRNOG00000003243
770	ENSRNOT00000004370	0.018401	4.71187	0.00566192	0.940019	0.999516	Farsa	ENSRNOG00000003149
771	ENSRNOT00000004372	0.768307	3.11117	3.46167	0.062807	0.999516	Nat9	ENSRNOG00000003264
772	ENSRNOT00000004379	0.01739	3.41714	0.0034967	0.952846	0.999516	Pycr2	ENSRNOG00000003267
773	ENSRNOT00000004382	0.297159	2.77228	0.550092	0.45828	0.999516	Fmod	ENSRNOG00000003183
774	ENSRNOT00000004383	-0.282852	5.82719	1.88483	0.169787	0.999516	Cacng4	ENSRNOG00000003262
775	ENSRNOT00000004385	0.233985	6.81146	1.3117	0.252087	0.999516	Qdpr	ENSRNOG00000003253
776	ENSRNOT00000004387	0.349642	2.29594	0.677115	0.410582	0.999516	Rcsd1	ENSRNOG00000003283
777	ENSRNOT00000004390	-0.0435025	0.725293	0.0113497	0.915158	0.999516	Fbxw10	ENSRNOG00000003287
778	ENSRNOT00000004394	-0.357174	4.35813	1.84546	0.174312	0.999516	Creg1	ENSRNOG00000003291
779	ENSRNOT00000004404	-0.076054	0.470882	0.0362737	0.848951	0.999516	Farsa	ENSRNOG00000003149
780	ENSRNOT00000004408	0.299817	3.57045	0.57362	0.448824	0.999516	Btg2	ENSRNOG00000003300
781	ENSRNOT00000004412	-0.0346318	4.89679	0.0192358	0.889693	0.999516	Flcn	ENSRNOG00000003302
782	ENSRNOT00000004416	-0.434708	5.7308	1.71915	0.189802	0.999516	Mgrn1	ENSRNOG00000003234
783	ENSRNOT00000004440	0.0462476	4.69793	0.035822	0.849884	0.999516	Dck	ENSRNOG00000003296
784	ENSRNOT00000004443	-0.557536	2.11523	1.70015	0.192269	0.999516	Glra2	ENSRNOG00000003313
785	ENSRNOT00000004448	0.021053	3.2264	0.00455115	0.946214	0.999516	Nt5m	ENSRNOG00000003332
786	ENSRNOT00000004456	-0.0835651	1.17021	0.0504358	0.822307	0.999516	Fancb	ENSRNOG00000003346
787	ENSRNOT00000004463	-0.00135221	1.55282	1.13421e-05	0.997313	0.999516	Gulp1	ENSRNOG00000003242
788	ENSRNOT00000004475	-0.12988	4.39883	0.236303	0.626889	0.999516	Rasd1	ENSRNOG00000003348
789	ENSRNOT00000004477	0.442702	6.32867	4.37901	0.036384	0.999516	Grin2c	ENSRNOG00000003280
790	ENSRNOT00000004495	-0.25881	1.60337	0.470633	0.492696	0.999516	Cdc73	ENSRNOG00000003258
791	ENSRNOT00000004499	-0.173537	2.75875	0.2711	0.602595	0.999516	Mcm9	ENSRNOG00000003281
792	ENSRNOT00000004508	0.380401	2.84315	1.07343	0.300172	0.999516	Klhl21	ENSRNOG00000003334
793	ENSRNOT00000004532	-0.0437827	2.92478	0.0143935	0.904505	0.999516	Map3k14	ENSRNOG00000003278
794	ENSRNOT00000004540	-0.233756	3.75605	0.675673	0.411081	0.999516	Ppm1d	ENSRNOG00000003329
795	ENSRNOT00000004560	0.247063	2.10132	0.442153	0.506085	0.999516	Adprm	ENSRNOG00000003397
796	ENSRNOT00000004563	0.340402	3.45312	1.30422	0.253443	0.999516	Ercc4	ENSRNOG00000070542
797	ENSRNOT00000004578	-0.17584	0.830793	0.134146	0.714172	0.999516	Cacng5	ENSRNOG00000003288
798	ENSRNOT00000004583	-0.317436	6.99433	1.40294	0.236232	0.999516	AABR07029195.1	ENSRNOG00000003401
799	ENSRNOT00000004590	0.176339	0.777629	0.180073	0.671311	0.999516	Il15	ENSRNOG00000003439
800	ENSRNOT00000004599	0.258125	0.711471	0.349125	0.554609	0.999516	Fmo4	ENSRNOG00000003400
801	ENSRNOT00000004601	0.188196	0.407751	0.177974	0.67312	0.999516	Klf1	ENSRNOG00000003443
802	ENSRNOT00000004602	0.215788	5.62598	1.02199	0.312047	0.999516	Adora1	ENSRNOG00000003442
803	ENSRNOT00000004609	0.0083111	3.05589	0.000627691	0.980012	0.999516	Myo1d	ENSRNOG00000003276
804	ENSRNOT00000004613	-0.111085	7.56064	0.317691	0.572998	0.999516	Cadm3	ENSRNOG00000003365
805	ENSRNOT00000004614	0.0102369	4.97665	0.0019695	0.964602	0.999516	Zfp330	ENSRNOG00000003461
806	ENSRNOT00000004619	0.112948	6.91159	0.286099	0.592731	0.999516	Gabrg2	ENSRNOG00000003241
807	ENSRNOT00000004621	-0.267943	2.5539	0.557181	0.455398	0.999516	Rnf150	ENSRNOG00000003479
809	ENSRNOT00000004646	0.00461007	6.93659	0.000444942	0.983171	0.999516	MAST1	ENSRNOG00000003469
810	ENSRNOT00000004672	-0.041734	3.08819	0.0161788	0.898785	0.999516	Thoc6	ENSRNOG00000003497
811	ENSRNOT00000004676	0.0386742	3.99746	0.0213011	0.883962	0.999516	Fundc1	ENSRNOG00000003470
812	ENSRNOT00000004698	-0.0358535	0.415442	0.00798638	0.928791	0.999516	Tbx2	ENSRNOG00000003517
813	ENSRNOT00000004702	-0.227877	7.14506	1.0659	0.301873	0.999516	Hcfc1r1	ENSRNOG00000003542
814	ENSRNOT00000004703	0.0641541	9.83288	0.123869	0.724875	0.999516	Nptxr	ENSRNOG00000016156
815	ENSRNOT00000004713	0.177714	2.13133	0.218251	0.640376	0.999516	Adamts4	ENSRNOG00000003538
816	ENSRNOT00000004718	0.108253	6.63932	0.274433	0.600373	0.999516	Hid1	ENSRNOG00000003464
817	ENSRNOT00000004722	0.0933301	5.02357	0.162757	0.68663	0.999516	Elac2	ENSRNOG00000003424
818	ENSRNOT00000004725	-0.294439	3.7426	0.396477	0.528914	0.999516	Gabra1	ENSRNOG00000003512
819	ENSRNOT00000004735	-0.364938	3.76403	1.33624	0.247698	0.999516	B4galt3	ENSRNOG00000003551
820	ENSRNOT00000004740	-0.0834284	4.62527	0.112513	0.737301	0.999516	Rufy1	ENSRNOG00000003536
821	ENSRNOT00000004741	-0.0395014	5.04747	0.0246813	0.875164	0.999516	Lypd1	ENSRNOG00000003453
822	ENSRNOT00000004742	-0.210118	3.27996	0.394273	0.530062	0.999516	Ccdc112	ENSRNOG00000003559
823	ENSRNOT00000004753	0.241691	4.72752	0.961802	0.326733	0.999516	Srebf1	ENSRNOG00000003463
824	ENSRNOT00000004762	-0.0921181	0.692749	0.0578341	0.809953	0.999516	Fmo2	ENSRNOG00000003510
825	ENSRNOT00000004770	0.195223	4.99271	0.682634	0.408681	0.999516	Lap3	ENSRNOG00000003289
826	ENSRNOT00000004772	-0.113678	4.88319	0.212038	0.645174	0.999516	Acbd6	ENSRNOG00000003550
827	ENSRNOT00000004776	-0.145614	3.1426	0.10818	0.742226	0.999516	Rufy3	ENSRNOG00000003428
828	ENSRNOT00000004783	-0.0303741	6.40394	0.0224792	0.880819	0.999516	Smyd2	ENSRNOG00000003583
829	ENSRNOT00000004784	0.00706139	3.90009	0.000649884	0.979662	0.999516	Fem1c	ENSRNOG00000003578
830	ENSRNOT00000004787	-0.238094	4.4413	0.863273	0.352824	0.999516	Utp3	ENSRNOG00000003599
831	ENSRNOT00000004797	0.0424712	9.05107	0.0502863	0.822566	0.999516	Tuba4a	ENSRNOG00000003597
832	ENSRNOT00000004799	-0.0660098	7.64702	0.105882	0.744882	0.999516	Prdx2	ENSRNOG00000003520
833	ENSRNOT00000004803	-0.0507504	3.91321	0.0341705	0.853345	0.999516	Grem2	ENSRNOG00000003616
834	ENSRNOT00000004808	-0.080177	6.89515	0.160013	0.689145	0.999516	Dynlt3	ENSRNOG00000003611
835	ENSRNOT00000004810	0.0874239	5.688	0.16614	0.683566	0.999516	Dstyk	ENSRNOG00000021298
836	ENSRNOT00000004829	-0.132385	6.31857	0.344115	0.557463	0.999516	Arhgap44	ENSRNOG00000003603
837	ENSRNOT00000004834	0.0980604	2.85389	0.0859256	0.769422	0.999516	Disp1	ENSRNOG00000003635
838	ENSRNOT00000004836	-0.0775476	7.95349	0.0972687	0.755132	0.999516	Atp5pd	ENSRNOG00000003626
839	ENSRNOT00000004843	0.107956	2.70516	0.0993891	0.752564	0.999516	Armc7	ENSRNOG00000042691
840	ENSRNOT00000004853	-0.374585	1.93777	0.871899	0.35043	0.999516	Nt5c	ENSRNOG00000003650
841	ENSRNOT00000004854	0.345142	0.193107	0.634555	0.425689	0.999516	Tab3	ENSRNOG00000003643
842	ENSRNOT00000004862	0.0100964	5.23048	0.00190361	0.965199	0.999516	Sumo2	ENSRNOG00000003661
843	ENSRNOT00000004864	0.754333	1.01333	1.63258	0.201346	0.999516	Fmo3	ENSRNOG00000003620
844	ENSRNOT00000004866	0.57868	1.5747	0.967385	0.325333	0.999516	Jchain	ENSRNOG00000003666
846	ENSRNOT00000004878	-0.197179	2.61097	0.212853	0.64454	0.999516	Ubxn4	ENSRNOG00000003625
847	ENSRNOT00000004881	0.391339	1.31377	0.852546	0.355833	0.999516	Uchl5	ENSRNOG00000003545
848	ENSRNOT00000004885	0.388873	4.50963	2.20696	0.137389	0.999516	Hnrnpab	ENSRNOG00000003645
849	ENSRNOT00000004891	0.0861977	4.6734	0.12468	0.724013	0.999516	Ddx49	ENSRNOG00000022368
850	ENSRNOT00000004895	-0.754701	2.02587	3.0908	0.0787362	0.999516	Cnpy2	ENSRNOG00000003549
851	ENSRNOT00000004896	0.00335516	3.32028	0.000114278	0.991471	0.999516	Ppox	ENSRNOG00000003567
852	ENSRNOT00000004911	-0.059766	5.95225	0.0869173	0.768133	0.999516	Nono	ENSRNOG00000003689
853	ENSRNOT00000004912	0.0480744	4.43508	0.0337242	0.854295	0.999516	Med28	ENSRNOG00000003592
854	ENSRNOT00000004917	-0.120491	5.56348	0.31105	0.577037	0.999516	Fh	ENSRNOG00000003653
855	ENSRNOT00000004919	-0.00958249	3.97529	0.00125554	0.971734	0.999516	Pnpt1	ENSRNOG00000003600
856	ENSRNOT00000004923	-0.0416203	2.19936	0.0121616	0.912187	0.999516	Fam184b	ENSRNOG00000003704
857	ENSRNOT00000004927	0.0874603	3.05704	0.0732751	0.786627	0.999516	Nvl	ENSRNOG00000003629
858	ENSRNOT00000004936	-0.193166	1.02751	0.236318	0.626878	0.999516	Pkmyt1	ENSRNOG00000003657
859	ENSRNOT00000004938	0.0705297	5.99788	0.113601	0.736081	0.999516	Ufc1	ENSRNOG00000003706
860	ENSRNOT00000004939	0.0687467	4.03032	0.065173	0.798499	0.999516	Cnih4	ENSRNOG00000003717
861	ENSRNOT00000004941	-0.739469	3.52935	3.19334	0.0739389	0.999516	Lrrc59	ENSRNOG00000003524
862	ENSRNOT00000004942	0.0975433	5.02594	0.168817	0.681165	0.999516	Tmed7	ENSRNOG00000003691
863	ENSRNOT00000004947	0.0582159	5.31339	0.0508777	0.821543	0.999516	Mrpl27	ENSRNOG00000003724
864	ENSRNOT00000004948	-0.264532	3.26088	0.638228	0.424353	0.999516	Atpaf2	ENSRNOG00000003719
865	ENSRNOT00000004950	0.262742	1.58281	0.447902	0.503333	0.999516	Prrx1	ENSRNOG00000003720
866	ENSRNOT00000004956	0.839982	4.28478	4.50539	0.0337882	0.999516	Col3a1	ENSRNOG00000003357
867	ENSRNOT00000004966	0.112495	2.38305	0.0974843	0.75487	0.999516	Endov	ENSRNOG00000003699
868	ENSRNOT00000004969	0.202717	1.44287	0.288667	0.591076	0.999516	Mcm6	ENSRNOG00000003703
869	ENSRNOT00000004972	0.819474	5.33441	4.13113	0.0421011	0.999516	Zmym3	ENSRNOG00000003707
870	ENSRNOT00000004995	-0.0701878	1.15179	0.0353753	0.850811	0.999516	Mgat5	ENSRNOG00000003614
871	ENSRNOT00000004999	0.0797107	7.41817	0.160807	0.688415	0.999516	Cdip1	ENSRNOG00000003328
872	ENSRNOT00000005006	-0.396657	2.70524	1.38741	0.238843	0.999516	Tmem163	ENSRNOG00000003769
873	ENSRNOT00000005015	0.479037	2.74382	1.25554	0.262497	0.999516	Galc	ENSRNOG00000003759
875	ENSRNOT00000005031	0.0723982	5.65521	0.118934	0.730193	0.999516	Hmox2	ENSRNOG00000003773
876	ENSRNOT00000005033	0.512497	2.91733	1.80688	0.178882	0.999516	Acot9	ENSRNOG00000003782
877	ENSRNOT00000005039	0.593299	0.89328	2.49624	0.114118	0.999516	Rilp	ENSRNOG00000003784
878	ENSRNOT00000005042	-0.860031	-0.0345436	4.26461	0.0389142	0.999516	Lancl3	ENSRNOG00000003756
880	ENSRNOT00000005048	0.0503838	5.23281	0.0448842	0.832217	0.999516	Clk4	ENSRNOG00000003714
881	ENSRNOT00000005050	-0.0704627	0.0500367	0.0271333	0.869163	0.999516	Chrne	ENSRNOG00000003777
882	ENSRNOT00000005052	0.283436	3.42315	0.75936	0.383529	0.999516	Qsox1	ENSRNOG00000003649
883	ENSRNOT00000005059	0.0415136	6.14443	0.0399882	0.841504	0.999516	Wdr26	ENSRNOG00000003723
884	ENSRNOT00000005066	-0.159744	1.48918	0.165583	0.684067	0.999516	Cfap52	ENSRNOG00000037718
885	ENSRNOT00000005067	-0.0802423	7.14053	0.111355	0.738607	0.999516	Nptx1	ENSRNOG00000003741
886	ENSRNOT00000005071	-0.192362	0.963441	0.251865	0.615765	0.999516	Clgn	ENSRNOG00000003755
887	ENSRNOT00000005072	0.255719	1.99023	0.501963	0.478639	0.999516	Opn3	ENSRNOG00000003778
888	ENSRNOT00000005073	0.153257	3.95131	0.211856	0.645316	0.999516	Col5a2	ENSRNOG00000003736
889	ENSRNOT00000005076	0.174674	2.36575	0.133234	0.715102	0.999516	Rgs9	ENSRNOG00000003800
890	ENSRNOT00000005078	0.103445	5.47689	0.203031	0.652285	0.999516	Zdhhc17	ENSRNOG00000003803
891	ENSRNOT00000005084	0.54995	4.37939	3.84264	0.0499648	0.999516	Angel2	ENSRNOG00000003795
892	ENSRNOT00000005089	-0.125743	5.58494	0.339521	0.560106	0.999516	Mrps7	ENSRNOG00000003797
893	ENSRNOT00000005090	-0.346693	2.20366	0.893726	0.34447	0.999516	Tada1	ENSRNOG00000003816
894	ENSRNOT00000005095	0.120967	1.53051	0.0770721	0.781305	0.999516	Vash2	ENSRNOG00000003832
895	ENSRNOT00000005109	-0.102328	1.61825	0.0442575	0.833375	0.999516	Nmral1	ENSRNOG00000003794
896	ENSRNOT00000005124	0.0308625	6.27721	0.024285	0.876162	0.999516	Scoc	ENSRNOG00000003853
897	ENSRNOT00000005125	0.508232	3.45113	1.95552	0.161993	0.999516	Blmh	ENSRNOG00000003563
898	ENSRNOT00000005126	0.194161	4.59167	0.611661	0.434163	0.999516	Dhx15	ENSRNOG00000003844
899	ENSRNOT00000005132	-0.251576	5.32888	1.27058	0.259658	0.999516	Slu7	ENSRNOG00000003822
900	ENSRNOT00000005138	0.0704067	7.89571	0.115168	0.734336	0.999516	Atp6ap2	ENSRNOG00000003858
901	ENSRNOT00000005143	-0.241949	0.439755	0.308323	0.578711	0.999516	Cxcr4	ENSRNOG00000003866
902	ENSRNOT00000005147	0.0179617	3.71832	0.0042178	0.948218	0.999516	Dedd	ENSRNOG00000003779
903	ENSRNOT00000005148	-0.0493719	3.44171	0.0285038	0.86593	0.999516	Gorab	ENSRNOG00000003861
904	ENSRNOT00000005155	0.0145408	3.90056	0.00242061	0.96076	0.999516	Sod3	ENSRNOG00000003869
905	ENSRNOT00000005156	0.112854	5.27858	0.232986	0.629319	0.999516	Rgs2	ENSRNOG00000003687
906	ENSRNOT00000005157	-0.228607	0.23478	0.33351	0.5636	0.999516	Tph2	ENSRNOG00000003880
907	ENSRNOT00000005163	0.144786	0.846034	0.147251	0.701177	0.999516	Rgs13	ENSRNOG00000003888
908	ENSRNOT00000005165	0.624154	1.95009	2.63137	0.104771	0.999516	Tspan6	ENSRNOG00000003786
909	ENSRNOT00000005167	0.0451425	0.630766	0.00772503	0.929962	0.999516	Tdp1	ENSRNOG00000003831
910	ENSRNOT00000005170	-0.136342	4.99554	0.328317	0.566652	0.999516	Ppp4r3b	ENSRNOG00000003712
911	ENSRNOT00000005190	-0.0596283	5.12562	0.0622379	0.802993	0.999516	Nenf	ENSRNOG00000003833
912	ENSRNOT00000005194	0.0446297	5.52217	0.0406193	0.840275	0.999516	Nit1	ENSRNOG00000003881
913	ENSRNOT00000005198	0.121997	3.02771	0.138489	0.709787	0.999516	Slc25a19	ENSRNOG00000003918
914	ENSRNOT00000005204	-0.0569938	4.47529	0.0500452	0.822985	0.999516	Stx8	ENSRNOG00000003849
915	ENSRNOT00000005209	-0.267202	4.73206	1.19236	0.274855	0.999516	Kcnh1	ENSRNOG00000003841
916	ENSRNOT00000005212	0.326842	0.752318	0.593724	0.440983	0.999516	Thsd7b	ENSRNOG00000003878
917	ENSRNOT00000005228	0.553474	2.33624	2.10755	0.146574	0.999516	Slc40a1	ENSRNOG00000003872
918	ENSRNOT00000005237	0.0229707	4.7047	0.00892238	0.924745	0.999516	Gid4	ENSRNOG00000003847
919	ENSRNOT00000005242	-0.0454104	6.03945	0.050555	0.8221	0.999516	Rnf167	ENSRNOG00000003879
920	ENSRNOT00000005255	0.200378	2.45848	0.297861	0.585226	0.999516	Ntn1	ENSRNOG00000003947
921	ENSRNOT00000005257	-0.0710958	4.85243	0.0903587	0.763722	0.999516	Wipi1	ENSRNOG00000003827
922	ENSRNOT00000005258	0.124104	4.37741	0.236032	0.627087	0.999516	Rab21	ENSRNOG00000003923
923	ENSRNOT00000005260	0.103436	3.17209	0.0722548	0.788082	0.999516	Commd10	ENSRNOG00000003958
924	ENSRNOT00000005262	-0.279354	2.95819	0.66317	0.415443	0.999516	Cpd	ENSRNOG00000003873
925	ENSRNOT00000005270	0.0761804	5.9877	0.133685	0.714641	0.999516	Trir	ENSRNOG00000003863
926	ENSRNOT00000005273	-0.151408	5.9162	0.53851	0.463051	0.999516	Ergic1	ENSRNOG00000003508
928	ENSRNOT00000005284	-0.444805	1.18605	1.21026	0.27128	0.999516	Cd55	ENSRNOG00000003927
929	ENSRNOT00000005286	0.0513328	5.71892	0.0593462	0.807532	0.999516	Nap1l1	ENSRNOG00000003890
931	ENSRNOT00000005292	0.0241321	2.93928	0.00517312	0.942662	0.999516	Slc25a19	ENSRNOG00000003918
932	ENSRNOT00000005293	0.576666	3.80096	3.21383	0.0730186	0.999516	Map2k4	ENSRNOG00000003834
933	ENSRNOT00000005304	-0.13438	5.48458	0.370065	0.542969	0.999516	Ttc1	ENSRNOG00000003980
934	ENSRNOT00000005306	-0.138427	5.78022	0.295121	0.586957	0.999516	Cfap36	ENSRNOG00000003901
935	ENSRNOT00000005317	0.0722729	5.83872	0.122109	0.726758	0.999516	Dnajc27	ENSRNOG00000003988
936	ENSRNOT00000005325	0.0441235	1.63866	0.01229	0.911727	0.999516	Tefm	ENSRNOG00000004000
937	ENSRNOT00000005329	0.0502252	7.09041	0.0579055	0.809838	0.999516	Psmc1	ENSRNOG00000003951
938	ENSRNOT00000005331	0.200399	3.40741	0.462575	0.496423	0.999516	Apln	ENSRNOG00000003984
939	ENSRNOT00000005346	-0.069379	7.24156	0.0618092	0.803659	0.999516	Pfdn2	ENSRNOG00000066932
940	ENSRNOT00000005347	0.0128241	7.35718	0.00431986	0.947596	0.999516	Grb2	ENSRNOG00000003990
941	ENSRNOT00000005349	0.144551	1.73143	0.159759	0.689378	0.999516	Pi4k2b	ENSRNOG00000003924
942	ENSRNOT00000005352	0.117405	3.37828	0.152291	0.696356	0.999516	Klhdc9	ENSRNOG00000004022
943	ENSRNOT00000005355	0.197599	2.56776	0.338119	0.560917	0.999516	Zranb3	ENSRNOG00000003979
944	ENSRNOT00000005361	-0.16444	4.00895	0.342577	0.558345	0.999516	Phlda1	ENSRNOG00000004019
945	ENSRNOT00000005363	-0.117405	4.37477	0.211969	0.645228	0.999516	Dnajb9	ENSRNOG00000004006
946	ENSRNOT00000005366	0.092183	4.84662	0.138834	0.709443	0.999516	Llgl1	ENSRNOG00000003948
947	ENSRNOT00000005367	0.265437	1.76642	0.49639	0.481091	0.999516	Fam20a	ENSRNOG00000003969
948	ENSRNOT00000005368	-0.126177	7.27158	0.396855	0.528718	0.999516	Pitpna	ENSRNOG00000003846
949	ENSRNOT00000005369	0.247067	3.40423	0.613415	0.433505	0.999516	Nrde2	ENSRNOG00000004004
950	ENSRNOT00000005370	-0.10204	7.3406	0.20452	0.651097	0.999516	Pfn1	ENSRNOG00000003975
951	ENSRNOT00000005374	0.112904	5.12844	0.24367	0.621568	0.999516	Gipc1	ENSRNOG00000003864
952	ENSRNOT00000005376	-0.256645	3.1367	0.629575	0.427511	0.999516	Nsmce2	ENSRNOG00000003964
953	ENSRNOT00000005379	0.0958705	4.60169	0.150304	0.698245	0.999516	Chmp6	ENSRNOG00000004014
954	ENSRNOT00000005381	0.0705792	1.17748	0.0275435	0.868187	0.999516	Sgca	ENSRNOG00000003998
955	ENSRNOT00000005389	0.146107	4.86861	0.361673	0.547579	0.999516	Adcy3	ENSRNOG00000003999
956	ENSRNOT00000005400	-0.12547	1.78418	0.113359	0.736351	0.999516	Dusp10	ENSRNOG00000004003
957	ENSRNOT00000005402	0.0956937	2.7658	0.0775072	0.780704	0.999516	Ptrhd1	ENSRNOG00000004059
958	ENSRNOT00000005408	0.0187351	2.68453	0.00317669	0.955053	0.999516	Osgepl1	ENSRNOG00000004001
959	ENSRNOT00000005423	0.21121	1.72044	0.290212	0.590085	0.999516	Ccdc42	ENSRNOG00000004075
960	ENSRNOT00000005426	-0.152856	2.99046	0.191332	0.66181	0.999516	Cwc25	ENSRNOG00000004091
961	ENSRNOT00000005438	0.182687	4.76071	0.571183	0.449789	0.999516	Lrrk2	ENSRNOG00000004048
962	ENSRNOT00000005439	-0.00226459	5.74387	0.000105722	0.991796	0.999516	Pnn	ENSRNOG00000004061
963	ENSRNOT00000005440	-0.357609	2.50214	0.395853	0.529239	0.999516	Tcaim	ENSRNOG00000004085
964	ENSRNOT00000005470	0.439535	1.95762	1.0505	0.305392	0.999516	Ptger1	ENSRNOG00000004094
965	ENSRNOT00000005471	-0.359623	7.03306	2.54425	0.110697	0.999516	Rpl23	ENSRNOG00000004107
966	ENSRNOT00000005477	-0.214456	3.90406	0.306909	0.579583	0.999516	Slit2	ENSRNOG00000003840
967	ENSRNOT00000005486	0.0700182	3.21427	0.0432379	0.835278	0.999516	Ubtd2	ENSRNOG00000004137
968	ENSRNOT00000005490	0.12294	3.26434	0.159551	0.68957	0.999516	Vasn	ENSRNOG00000004141
970	ENSRNOT00000005504	-0.168106	0.871847	0.192266	0.661037	0.999516	Prorsd1	ENSRNOG00000004145
971	ENSRNOT00000005505	0.32088	0.744928	0.504352	0.477594	0.999516	C4bpb	ENSRNOG00000004125
972	ENSRNOT00000005516	-0.625477	3.26921	2.74215	0.0977334	0.999516	Dusp18	ENSRNOG00000024945
973	ENSRNOT00000005518	0.0385492	2.90064	0.0126588	0.910418	0.999516	Zfp18	ENSRNOG00000003981
974	ENSRNOT00000005519	-0.264211	2.78148	0.479698	0.488559	0.999516	Samd14	ENSRNOG00000004155
975	ENSRNOT00000005522	0.0571077	6.78769	0.0788795	0.778822	0.999516	Lasp1	ENSRNOG00000004132
976	ENSRNOT00000005523	-0.199819	1.4273	0.249281	0.617582	0.999516	Mgat4c	ENSRNOG00000004149
977	ENSRNOT00000005532	-0.191193	4.70224	0.507829	0.47608	0.999516	Cep170	ENSRNOG00000004127
978	ENSRNOT00000005535	0.372491	8.45219	3.08522	0.0790066	0.999516	Eno2	ENSRNOG00000013141
979	ENSRNOT00000005545	-0.584585	0.719657	2.44552	0.117861	0.999516	Grip1	ENSRNOG00000004013
980	ENSRNOT00000005551	0.253669	4.69941	0.863046	0.352888	0.999516	Adipor1	ENSRNOG00000004143
981	ENSRNOT00000005556	-0.0484339	5.86971	0.0508148	0.821652	0.999516	Kcnv1	ENSRNOG00000004117
982	ENSRNOT00000005561	-0.02676	5.6737	0.0159569	0.899478	0.999516	Enpp2	ENSRNOG00000004089
983	ENSRNOT00000005568	-0.345277	4.53002	1.67658	0.19538	0.999516	Trappc6b	ENSRNOG00000004103
984	ENSRNOT00000005571	0.294793	5.45579	1.53026	0.216073	0.999516	Tnpo2	ENSRNOG00000003970
985	ENSRNOT00000005577	-0.250388	8.1031	1.0371	0.308498	0.999516	Rps29	ENSRNOG00000004196
986	ENSRNOT00000005581	0.166276	3.75871	0.348836	0.554773	0.999516	Fbxw9	ENSRNOG00000004212
987	ENSRNOT00000005583	0.0997992	2.89611	0.0658831	0.797428	0.999516	Dnah9	ENSRNOG00000004171
988	ENSRNOT00000005587	0.15674	2.81591	0.221189	0.638135	0.999516	Pacrgl	ENSRNOG00000004140
989	ENSRNOT00000005588	-0.262734	8.60664	1.28553	0.256874	0.999516	Rpl26	ENSRNOG00000004214
990	ENSRNOT00000005601	-0.586605	6.93108	3.42551	0.0641964	0.999516	Eno2	ENSRNOG00000013141
991	ENSRNOT00000005608	-0.192798	2.35185	0.238873	0.625021	0.999516	Mgat2	ENSRNOG00000004234
992	ENSRNOT00000005611	-0.12661	4.82503	0.24664	0.619451	0.999516	Aldh9a1	ENSRNOG00000004027
993	ENSRNOT00000005612	0.429963	2.39603	1.20721	0.271885	0.999516	Eno3	ENSRNOG00000004078
994	ENSRNOT00000005615	-0.0689078	4.32951	0.0697489	0.791703	0.999516	Prps2	ENSRNOG00000004160
995	ENSRNOT00000005619	0.110117	5.87267	0.281955	0.595422	0.999516	Arhgap30	ENSRNOG00000004192
996	ENSRNOT00000005620	-0.241078	1.30415	0.392551	0.530962	0.999516	Tlr7	ENSRNOG00000004249
997	ENSRNOT00000005623	-0.318733	0.408418	0.466487	0.494608	0.999516	Slc9a7	ENSRNOG00000004150
998	ENSRNOT00000005624	0.287699	3.57503	0.893293	0.344586	0.999516	Fzr1	ENSRNOG00000004169
999	ENSRNOT00000005630	-0.05032	5.05962	0.0485658	0.825578	0.999516	Chst7	ENSRNOG00000004258
1000	ENSRNOT00000005640	-0.0133946	5.76614	0.00418405	0.948425	0.999516	Dohh	ENSRNOG00000004259
1002	ENSRNOT00000005644	0.20108	3.34114	0.320827	0.571111	0.999516	Itga3	ENSRNOG00000004276
1003	ENSRNOT00000005645	-0.196652	1.47229	0.150599	0.697963	0.999516	Ifitm1	ENSRNOG00000004273
1004	ENSRNOT00000005646	0.270452	4.3891	1.1461	0.284367	0.999516	Slc35e4	ENSRNOG00000004168
1005	ENSRNOT00000005647	0.300076	2.29983	0.660465	0.416396	0.999516	Sdccag8	ENSRNOG00000004181
1006	ENSRNOT00000005648	-0.0423037	3.70562	0.0221982	0.881561	0.999516	Zfp386	ENSRNOG00000004268
1007	ENSRNOT00000005653	-0.0874865	5.26674	0.141833	0.706466	0.999516	Spag7	ENSRNOG00000004246
1008	ENSRNOT00000005656	0.0384162	5.16967	0.028489	0.865964	0.999516	Dhps	ENSRNOG00000004219
1009	ENSRNOT00000005658	0.290393	5.07852	1.56128	0.211478	0.999516	Vmp1	ENSRNOG00000003967
1010	ENSRNOT00000005661	0.0691196	3.57617	0.0545542	0.81532	0.999516	Ptrh2	ENSRNOG00000004288
1011	ENSRNOT00000005664	0.192907	2.5083	0.306627	0.579757	0.999516	Pkdcc	ENSRNOG00000004205
1012	ENSRNOT00000005665	0.184193	3.59204	0.311529	0.576743	0.999516	Abca8a	ENSRNOG00000004147
1013	ENSRNOT00000005666	0.394594	1.95612	0.608138	0.43549	0.999516	Osr1	ENSRNOG00000004210
1014	ENSRNOT00000005668	0.010662	5.10218	0.0021917	0.96266	0.999516	Lrp12	ENSRNOG00000004152
1015	ENSRNOT00000005674	-0.693917	2.05131	3.63573	0.0565517	0.999516	Ascl1	ENSRNOG00000004294
1016	ENSRNOT00000005677	0.0680099	2.58826	0.0390012	0.843446	0.999516	Soat1	ENSRNOG00000004111
1017	ENSRNOT00000005679	-0.17413	4.3125	0.398984	0.527615	0.999516	Tac3	ENSRNOG00000004229
1018	ENSRNOT00000005684	0.0733276	7.00847	0.111482	0.738463	0.999516	Tmem94	ENSRNOG00000004032
1019	ENSRNOT00000005686	0.289792	1.84856	0.614925	0.432939	0.999516	Irak3	ENSRNOG00000004226
1020	ENSRNOT00000005687	0.0106531	4.38032	0.00157718	0.968321	0.999516	Baiap2	ENSRNOG00000004049
1021	ENSRNOT00000005694	-0.101807	4.18913	0.132255	0.716106	0.999516	Tmbim4	ENSRNOG00000004312
1022	ENSRNOT00000005702	0.171299	3.87785	0.163127	0.686294	0.999516	Lamtor1	ENSRNOG00000004319
1023	ENSRNOT00000005705	-0.0578894	3.88748	0.0400443	0.841394	0.999516	Ebag9	ENSRNOG00000004220
1024	ENSRNOT00000005715	0.307509	3.44906	1.12702	0.288413	0.999516	Ints7	ENSRNOG00000004263
1025	ENSRNOT00000005719	-0.123483	6.99293	0.325917	0.568073	0.999516	Mgst3	ENSRNOG00000004245
1026	ENSRNOT00000005726	0.195744	3.60043	0.479126	0.488819	0.999516	Tor3a	ENSRNOG00000004307
1027	ENSRNOT00000005740	-0.4125	3.78819	2.17077	0.140655	0.999516	Ccdc59	ENSRNOG00000004183
1028	ENSRNOT00000005743	-0.285956	3.25795	0.73435	0.391477	0.999516	Yy1	ENSRNOG00000004339
1029	ENSRNOT00000005746	-0.06244	1.83571	0.0230656	0.879287	0.999516	Timp3	ENSRNOG00000004303
1030	ENSRNOT00000005762	0.0892779	6.06164	0.188413	0.664241	0.999516	Cdk17	ENSRNOG00000004148
1031	ENSRNOT00000005774	0.0636749	3.97254	0.0549065	0.814735	0.999516	Trib2	ENSRNOG00000004110
1032	ENSRNOT00000005781	-0.0804277	5.59902	0.135978	0.712313	0.999516	Glrx5	ENSRNOG00000004206
1033	ENSRNOT00000005786	0.0951194	6.67113	0.197673	0.656606	0.999516	Eif3h	ENSRNOG00000004252
1034	ENSRNOT00000005794	-0.196309	3.81038	0.492835	0.482666	0.999516	Llph-ps1	ENSRNOG00000004316
1035	ENSRNOT00000005798	0.336274	1.30631	0.822858	0.364346	0.999516	Ppm1h	ENSRNOG00000004314
1036	ENSRNOT00000005803	-0.0379126	4.04978	0.0211713	0.884313	0.999516	Dcaf13	ENSRNOG00000004301
1037	ENSRNOT00000005811	-0.0932562	2.70626	0.0636886	0.800758	0.999516	Tstd1	ENSRNOG00000004255
1038	ENSRNOT00000005815	-0.104363	5.29279	0.177692	0.673364	0.999516	Mrpl13	ENSRNOG00000004401
1039	ENSRNOT00000005817	0.238023	4.78302	0.785855	0.375356	0.999516	Zdhhc3	ENSRNOG00000004344
1040	ENSRNOT00000005821	0.156236	0.467085	0.167282	0.682539	0.999516	Klhl28	ENSRNOG00000004218
1041	ENSRNOT00000005825	0.0600192	4.55885	0.0590719	0.807969	0.999516	Sptssa	ENSRNOG00000004292
1042	ENSRNOT00000005832	0.108957	4.78188	0.199891	0.654809	0.999516	Klhl12	ENSRNOG00000004193
1043	ENSRNOT00000005834	-0.220878	3.93445	0.668338	0.413632	0.999516	Mtif2	ENSRNOG00000004161
1044	ENSRNOT00000005837	0.0299384	3.10624	0.00845467	0.926738	0.999516	Phf5a	ENSRNOG00000024170
1046	ENSRNOT00000005845	-0.0448644	4.46111	0.0282925	0.866423	0.999516	Rabif	ENSRNOG00000004424
1047	ENSRNOT00000005846	0.138662	5.22023	0.375393	0.540079	0.999516	Daam1	ENSRNOG00000004345
1048	ENSRNOT00000005855	0.371396	5.10342	1.78182	0.181926	0.999516	Babam2	ENSRNOG00000004364
1049	ENSRNOT00000005858	0.0310247	6.55836	0.0168206	0.896808	0.999516	Kidins220	ENSRNOG00000023176
1050	ENSRNOT00000005861	0.833956	3.70244	3.05754	0.0803633	0.999516	Togaram1	ENSRNOG00000004415
1051	ENSRNOT00000005863	-0.889316	0.817259	3.18996	0.0740918	0.999516	Lpin1	ENSRNOG00000004377
1052	ENSRNOT00000005866	-0.462683	2.07487	1.62	0.203092	0.999516	Cbln4	ENSRNOG00000004372
1053	ENSRNOT00000005872	0.553721	2.10473	1.85992	0.172634	0.999516	Rps27a	ENSRNOG00000004426
1054	ENSRNOT00000005873	-0.205379	3.32475	0.250048	0.617041	0.999516	Gtf2a1	ENSRNOG00000004300
1055	ENSRNOT00000005876	0.242159	1.91778	0.396139	0.52909	0.999516	Vipr2	ENSRNOG00000004317
1056	ENSRNOT00000005879	0.0328706	7.68574	0.0261929	0.87143	0.999516	Flywch1	ENSRNOG00000004333
1057	ENSRNOT00000005881	-0.102632	0.208328	0.0668899	0.79592	0.999516	Ston2	ENSRNOG00000004458
1058	ENSRNOT00000005882	-0.62341	1.88339	1.38046	0.240023	0.999516	Pax6	ENSRNOG00000004410
1060	ENSRNOT00000005901	-0.0288036	3.68814	0.010416	0.91871	0.999516	Fam210b	ENSRNOG00000004466
1061	ENSRNOT00000005903	0.108362	2.00915	0.0844807	0.771315	0.999516	Dglucy	ENSRNOG00000004442
1062	ENSRNOT00000005905	-0.260057	3.90494	0.80906	0.368398	0.999516	Myt1l	ENSRNOG00000004269
1063	ENSRNOT00000005908	-0.0667544	3.06897	0.0393192	0.842818	0.999516	Ccdc88c	ENSRNOG00000004482
1064	ENSRNOT00000005909	0.360439	1.6209	0.823472	0.364167	0.999516	Tspan8	ENSRNOG00000004411
1065	ENSRNOT00000005910	-0.107229	4.6275	0.159039	0.690043	0.999516	Btg1	ENSRNOG00000004284
1066	ENSRNOT00000005911	-0.316663	2.69247	0.894423	0.344282	0.999516	Elk3	ENSRNOG00000004367
1067	ENSRNOT00000005917	-0.114444	4.47282	0.179877	0.671479	0.999516	Wdr83	ENSRNOG00000004287
1068	ENSRNOT00000005919	-0.335622	1.09059	0.789929	0.374122	0.999516	Sdr9c7	ENSRNOG00000004459
1069	ENSRNOT00000005925	0.133202	0.402535	0.100306	0.751463	0.999516	Commd5	ENSRNOG00000004484
1070	ENSRNOT00000005930	-0.125981	4.16325	0.229225	0.632099	0.999516	Lta4h	ENSRNOG00000004494
1071	ENSRNOT00000005933	-0.124809	0.682279	0.081963	0.774655	0.999516	Gpr135	ENSRNOG00000004499
1072	ENSRNOT00000005934	1.0092	2.90186	3.25882	0.0710404	0.999516	Tcn2	ENSRNOG00000004280
1073	ENSRNOT00000005939	-0.187246	1.70311	0.238304	0.625434	0.999516	Fam117a	ENSRNOG00000004417
1074	ENSRNOT00000005942	0.156663	3.62355	0.267972	0.604696	0.999516	Caskin2	ENSRNOG00000004310
1075	ENSRNOT00000005943	0.25561	3.63708	0.754131	0.385172	0.999516	Polr3h	ENSRNOG00000004471
1076	ENSRNOT00000005961	0.143506	4.14369	0.222201	0.637368	0.999516	Adss	ENSRNOG00000004481
1077	ENSRNOT00000005977	0.0810987	6.47838	0.112621	0.737179	0.999516	Cep131	ENSRNOG00000004430
1078	ENSRNOT00000005987	-0.00436436	8.41929	0.000518351	0.981836	0.999516	Cltc	ENSRNOG00000004291
1079	ENSRNOT00000005996	-1.06657	4.17925	4.8654	0.0274004	0.999516	Pes1	ENSRNOG00000004515
1080	ENSRNOT00000005997	0.0611658	1.56982	0.0233432	0.878568	0.999516	Apool	ENSRNOG00000004512
1081	ENSRNOT00000006005	-0.906878	3.65873	2.65626	0.103143	0.999516	Dcaf5	ENSRNOG00000004556
1082	ENSRNOT00000006008	0.134359	2.5976	0.155197	0.693618	0.999516	Chrdl1	ENSRNOG00000004330
1083	ENSRNOT00000006018	0.0894741	5.40946	0.173516	0.677005	0.999516	Fam20b	ENSRNOG00000004337
1084	ENSRNOT00000006020	-0.113867	4.09336	0.18187	0.669771	0.999516	Rdh14	ENSRNOG00000039551
1085	ENSRNOT00000006029	-0.190851	2.24464	0.238427	0.625345	0.999516	Slc25a32	ENSRNOG00000004403
1086	ENSRNOT00000006034	0.019837	4.87718	0.0065936	0.935282	0.999516	Brd1	ENSRNOG00000004538
1087	ENSRNOT00000006035	-0.134733	0.82323	0.0992746	0.752702	0.999516	Sash3	ENSRNOG00000004409
1088	ENSRNOT00000006044	-0.0279783	1.14129	0.00488012	0.944307	0.999516	Zfp472	ENSRNOG00000004572
1089	ENSRNOT00000006051	-0.103961	3.30472	0.108103	0.742315	0.999516	Rxylt1	ENSRNOG00000004421
1090	ENSRNOT00000006055	0.542666	0.798983	1.8959	0.168538	0.999516	Clec3b	ENSRNOG00000004540
1091	ENSRNOT00000006063	-0.107984	5.39612	0.24396	0.621361	0.999516	Ublcp1	ENSRNOG00000004477
1092	ENSRNOT00000006073	-0.256039	2.63941	0.554671	0.456415	0.999516	Spdya	ENSRNOG00000004534
1093	ENSRNOT00000006074	-0.563178	3.12909	2.85871	0.0908804	0.999516	Ofd1	ENSRNOG00000004574
1094	ENSRNOT00000006093	0.599456	4.48441	1.35697	0.244064	0.999516	Anapc4	ENSRNOG00000004130
1095	ENSRNOT00000006098	0.486978	6.03293	2.76764	0.0961879	0.999516	Cacnb1	ENSRNOG00000004518
1096	ENSRNOT00000006109	0.465668	0.537516	1.17736	0.277894	0.999516	Lum	ENSRNOG00000004610
1097	ENSRNOT00000006111	0.174875	3.60856	0.341699	0.55885	0.999516	Rnd3	ENSRNOG00000004624
1098	ENSRNOT00000006118	-0.192239	2.28646	0.254608	0.613849	0.999516	Znf8	ENSRNOG00000031459
1099	ENSRNOT00000006131	-0.162808	2.23106	0.109122	0.741146	0.999516	Atg2b	ENSRNOG00000004519
1100	ENSRNOT00000006137	0.237559	2.95072	0.505811	0.476958	0.999516	Gemin2	ENSRNOG00000004360
1101	ENSRNOT00000006143	-0.129304	6.57664	0.350898	0.553605	0.999516	Sel1l	ENSRNOG00000004464
1102	ENSRNOT00000006144	0.16944	3.60619	0.239501	0.624567	0.999516	Dync2i1	ENSRNOG00000004520
1103	ENSRNOT00000006157	-0.0973141	1.00197	0.0618077	0.803661	0.999516	Meis1	ENSRNOG00000004606
1104	ENSRNOT00000006160	-0.0610193	3.57154	0.0464116	0.829429	0.999516	Mtfp1	ENSRNOG00000004640
1105	ENSRNOT00000006177	0.0790456	0.653071	0.033847	0.854033	0.999516	Cdin1	ENSRNOG00000004571
1106	ENSRNOT00000006179	-0.314427	3.95511	1.306	0.253119	0.999516	Slc35b1	ENSRNOG00000004510
1107	ENSRNOT00000006181	0.381819	0.663924	0.735998	0.390946	0.999516	Sstr4	ENSRNOG00000004641
1108	ENSRNOT00000006185	-0.0660251	3.29178	0.0439511	0.833945	0.999516	Mterf3	ENSRNOG00000004492
1109	ENSRNOT00000006186	0.188325	5.23052	0.680531	0.409404	0.999516	Dipk1b	ENSRNOG00000004532
1110	ENSRNOT00000006188	0.375049	1.21524	1.0306	0.310018	0.999516	Myc	ENSRNOG00000004500
1111	ENSRNOT00000006190	0.149151	7.35236	0.532892	0.465394	0.999516	Ppp1cb	ENSRNOG00000004612
1112	ENSRNOT00000006191	0.0305126	3.82015	0.0123251	0.911602	0.999516	Fance	ENSRNOG00000000504
1113	ENSRNOT00000006195	0.33782	1.00372	0.733569	0.391729	0.999516	Fzd6	ENSRNOG00000004660
1114	ENSRNOT00000006200	0.125907	2.77663	0.122719	0.726104	0.999516	Thbd	ENSRNOG00000004687
1115	ENSRNOT00000006203	0.109445	1.24274	0.0892761	0.765099	0.999516	Fibin	ENSRNOG00000004699
1116	ENSRNOT00000006205	-0.0178	2.29851	0.0023946	0.960971	0.999516	Nxt1	ENSRNOG00000004700
1117	ENSRNOT00000006209	-0.0576769	5.6261	0.0737129	0.786006	0.999516	Rad21	ENSRNOG00000004420
1118	ENSRNOT00000006217	-0.18218	4.41732	0.46878	0.493549	0.999516	Map2k6	ENSRNOG00000004437
1119	ENSRNOT00000006218	-0.370312	4.46804	2.09339	0.147938	0.999516	Rhot1	ENSRNOG00000004093
1120	ENSRNOT00000006219	-0.218013	4.27977	0.394755	0.52981	0.999516	Cntn1	ENSRNOG00000004438
1121	ENSRNOT00000006223	0.0632894	5.64613	0.0940751	0.759059	0.999516	Klhdc2	ENSRNOG00000004474
1122	ENSRNOT00000006233	0.461337	5.35276	2.50316	0.113618	0.999516	Otud5	ENSRNOG00000008764
1123	ENSRNOT00000006239	-0.0278626	6.93067	0.0195467	0.88881	0.999516	Dazap2	ENSRNOG00000004628
1124	ENSRNOT00000006240	0.205307	5.945	1.00798	0.315387	0.999516	Arel1	ENSRNOG00000004382
1125	ENSRNOT00000006257	-0.0428517	1.58942	0.01159	0.914268	0.999516	Aard	ENSRNOG00000004708
1126	ENSRNOT00000006264	0.438613	2.61756	1.11525	0.290943	0.999516	Itgbl1	ENSRNOG00000004516
1127	ENSRNOT00000006281	0.199249	0.501327	0.258374	0.61124	0.999516	Wdr25	ENSRNOG00000004733
1128	ENSRNOT00000006284	0.00113436	0.51989	8.77394e-06	0.997637	0.999516	L3hypdh	ENSRNOG00000004503
1129	ENSRNOT00000006287	-0.0389635	2.92829	0.00677208	0.934414	0.999516	Gzf1	ENSRNOG00000004735
1130	ENSRNOT00000006297	-0.243978	4.9421	0.966739	0.325495	0.999516	Fcf1	ENSRNOG00000004723
1131	ENSRNOT00000006300	-0.16626	3.82843	0.2553	0.613368	0.999516	Tmem158	ENSRNOG00000004757
1132	ENSRNOT00000006306	0.199586	2.82647	0.300771	0.5834	0.999516	Cd48	ENSRNOG00000004737
1133	ENSRNOT00000006314	-0.24946	4.48151	0.751068	0.386138	0.999516	Pam16	ENSRNOG00000004608
1134	ENSRNOT00000006321	-0.101664	5.24248	0.192158	0.661127	0.999516	Jkamp	ENSRNOG00000004751
1135	ENSRNOT00000006325	-0.0608175	1.26424	0.0234386	0.878322	0.999516	Pp2d1	ENSRNOG00000004719
1136	ENSRNOT00000006327	0.124082	3.64819	0.194442	0.659245	0.999516	Tsen54	ENSRNOG00000004598
1137	ENSRNOT00000006329	-0.452828	5.43073	1.32046	0.250509	0.999516	Napb	ENSRNOG00000004753
1138	ENSRNOT00000006340	-0.215302	2.94747	0.41407	0.519911	0.999516	Slc30a1	ENSRNOG00000004749
1139	ENSRNOT00000006341	-0.449302	6.30444	3.38494	0.0657946	0.999516	Kif5c	ENSRNOG00000004680
1140	ENSRNOT00000006345	0.0052152	0.987168	0.000164001	0.989782	0.999516	Edc4	ENSRNOG00000024025
1141	ENSRNOT00000006349	0.0623298	1.98699	0.0156846	0.900335	0.999516	Ano3	ENSRNOG00000004731
1142	ENSRNOT00000006357	-0.0659825	3.68208	0.0502397	0.822647	0.999516	Creld2	ENSRNOG00000004659
1143	ENSRNOT00000006359	0.543682	7.71283	4.08411	0.0432883	0.999516	Rpl19	ENSRNOG00000004741
1144	ENSRNOT00000006361	-0.527509	5.32649	2.10958	0.146379	0.999516	Nsf	ENSRNOG00000003905
1145	ENSRNOT00000006365	-0.0508133	3.02308	0.0227845	0.880019	0.999516	Ftsj1	ENSRNOG00000004776
1146	ENSRNOT00000006366	0.0493813	4.96735	0.0459216	0.830318	0.999516	Fbxo7	ENSRNOG00000004637
1147	ENSRNOT00000006369	0.522745	3.79579	1.28259	0.257419	0.999516	Sec23a	ENSRNOG00000004657
1148	ENSRNOT00000006371	0.243875	1.03735	0.369018	0.54354	0.999516	Tc2n	ENSRNOG00000004754
1149	ENSRNOT00000006373	-0.201979	10.1485	1.08893	0.296708	0.999516	Rtn1	ENSRNOG00000004794
1150	ENSRNOT00000006374	-0.134757	3.16853	0.170543	0.679629	0.999516	Cdkl1	ENSRNOG00000038720
1151	ENSRNOT00000006385	-0.0893856	2.78178	0.0708624	0.790085	0.999516	AABR07053185.1	ENSRNOG00000004787
1153	ENSRNOT00000006393	0.254033	3.77468	0.675785	0.411042	0.999516	Rims2	ENSRNOG00000004201
1154	ENSRNOT00000006395	0.0901253	3.6146	0.0835571	0.772534	0.999516	Utp25	ENSRNOG00000004789
1155	ENSRNOT00000006403	-0.278953	-0.254076	0.401142	0.5265	0.999516	Rock2	ENSRNOG00000004496
1156	ENSRNOT00000006406	0.0255691	4.03902	0.00873531	0.925536	0.999516	Immp1l	ENSRNOG00000004829
1157	ENSRNOT00000006407	0.00285286	1.69284	5.31495e-05	0.994183	0.999516	Crk	ENSRNOG00000025792
1158	ENSRNOT00000006411	-0.0642323	6.2255	0.101681	0.749821	0.999516	Baalc	ENSRNOG00000004697
1159	ENSRNOT00000006412	0.224668	4.6732	0.854299	0.355339	0.999516	Ndufaf5	ENSRNOG00000004784
1160	ENSRNOT00000006416	-0.563041	1.34235	2.14123	0.143386	0.999516	Pole3	ENSRNOG00000004843
1161	ENSRNOT00000006425	-0.192138	2.19416	0.189659	0.663201	0.999516	Sos2	ENSRNOG00000004826
1162	ENSRNOT00000006426	-0.142488	2.21994	0.161893	0.687419	0.999516	Wif1	ENSRNOG00000004476
1163	ENSRNOT00000006429	-0.220174	3.53926	0.40802	0.522976	0.999516	Ube2e3	ENSRNOG00000004544
1164	ENSRNOT00000006431	0.0270069	2.25432	0.00574878	0.939562	0.999516	Dnajc24	ENSRNOG00000004842
1165	ENSRNOT00000006436	0.0826428	5.43919	0.130476	0.717939	0.999516	Rnf145	ENSRNOG00000004602
1166	ENSRNOT00000006443	-0.502257	5.91192	4.81648	0.0281889	0.999516	Rtn4	ENSRNOG00000004621
1167	ENSRNOT00000006454	-0.153662	4.25795	0.349923	0.554157	0.999516	Flrt3	ENSRNOG00000004874
1168	ENSRNOT00000006459	-1.16596	2.92908	4.36523	0.0366796	0.999516	Pak3	ENSRNOG00000004676
1169	ENSRNOT00000006460	0.215584	6.41725	0.764945	0.381786	0.999516	Galnt16	ENSRNOG00000004589
1170	ENSRNOT00000006473	0.279735	2.56006	0.669159	0.413345	0.999516	L2hgdh	ENSRNOG00000004857
1171	ENSRNOT00000006481	-0.0680377	3.66086	0.0522988	0.81911	0.999516	Arl14ep	ENSRNOG00000004891
1172	ENSRNOT00000006483	-0.0100437	4.34845	0.00155175	0.968578	0.999516	Arf2	ENSRNOG00000004807
1173	ENSRNOT00000006484	0.0136511	4.12664	0.00264998	0.958945	0.999516	Zdhhc9	ENSRNOG00000004581
1174	ENSRNOT00000006492	-0.0791831	5.8	0.153632	0.695088	0.999516	Ylpm1	ENSRNOG00000027317
1175	ENSRNOT00000006502	-0.114836	2.65021	0.110802	0.739233	0.999516	Dyrk3	ENSRNOG00000004870
1176	ENSRNOT00000006504	-0.0798425	3.00473	0.0305981	0.86114	0.999516	Fam171b	ENSRNOG00000004783
1177	ENSRNOT00000006505	-0.307143	4.07384	1.04685	0.306234	0.999516	Ttc27	ENSRNOG00000042932
1178	ENSRNOT00000006509	0.00445621	3.58692	0.000237772	0.987697	0.999516	Dmac2l	ENSRNOG00000004893
1179	ENSRNOT00000006521	-0.238403	6.24703	1.06941	0.301078	0.999516	Mta1	ENSRNOG00000004711
1180	ENSRNOT00000006524	0.0108471	3.55455	0.00141886	0.969953	0.999516	Kcna4	ENSRNOG00000004918
1181	ENSRNOT00000006527	0.00141605	2.07979	1.27871e-05	0.997147	0.999516	Strn	ENSRNOG00000004806
1182	ENSRNOT00000006533	0.0357487	2.29711	0.0104349	0.918637	0.999516	Cyp4f1	ENSRNOG00000004786
1183	ENSRNOT00000006542	-0.197912	4.37067	0.392385	0.531048	0.999516	Sec14l2	ENSRNOG00000004672
1184	ENSRNOT00000006543	-0.0114388	3.48479	0.00151235	0.968979	0.999516	Supt7l	ENSRNOG00000004927
1185	ENSRNOT00000006562	-0.219686	4.56242	0.657739	0.417359	0.999516	Akap6	ENSRNOG00000004841
1186	ENSRNOT00000006566	-0.357006	5.17658	2.01689	0.155558	0.999516	Gns	ENSRNOG00000046159
1187	ENSRNOT00000006567	-0.318635	2.12716	0.667088	0.414069	0.999516	Sar1b	ENSRNOG00000004820
1188	ENSRNOT00000006570	0.0965752	5.09208	0.181265	0.670288	0.999516	Rtcb	ENSRNOG00000004813
1189	ENSRNOT00000006582	0.0745821	5.30459	0.0880048	0.766729	0.999516	Esyt2	ENSRNOG00000032391
1190	ENSRNOT00000006584	-0.0927404	4.29303	0.126032	0.722582	0.999516	Syap1	ENSRNOG00000004304
1191	ENSRNOT00000006591	-0.10741	6.84984	0.252127	0.615581	0.999516	Npm1	ENSRNOG00000004616
1192	ENSRNOT00000006599	0.276349	4.00908	1.07255	0.30037	0.999516	Gpn1	ENSRNOG00000004941
1193	ENSRNOT00000006604	-0.30961	1.61116	0.592912	0.441295	0.999516	Foxn3	ENSRNOG00000004709
1194	ENSRNOT00000006610	-0.115235	4.51957	0.179932	0.671432	0.999516	Sel1l3	ENSRNOG00000004932
1195	ENSRNOT00000006618	0.215145	2.85881	0.404466	0.524792	0.999516	Ahr	ENSRNOG00000004342
1196	ENSRNOT00000006621	-0.184342	6.15319	0.837571	0.360092	0.999516	Yaf2	ENSRNOG00000004773
1197	ENSRNOT00000006628	0.0589624	5.33167	0.0698584	0.791543	0.999516	Commd9	ENSRNOG00000004755
1198	ENSRNOT00000006637	0.200289	1.11942	0.235571	0.627424	0.999516	Syt2	ENSRNOG00000004756
1199	ENSRNOT00000006638	-0.0322207	1.12908	0.00735014	0.931679	0.999516	Capn6	ENSRNOG00000004882
1200	ENSRNOT00000006641	-0.054391	2.25289	0.0228879	0.879749	0.999516	Zfp3	ENSRNOG00000005009
1201	ENSRNOT00000006680	0.490768	3.29544	2.49929	0.113897	0.999516	Glis2	ENSRNOG00000004766
1202	ENSRNOT00000006685	-0.143596	2.62933	0.172446	0.677947	0.999516	Nudcd1	ENSRNOG00000024929
1203	ENSRNOT00000006699	0.0803756	3.97163	0.089688	0.764574	0.999516	Surf6	ENSRNOG00000005031
1204	ENSRNOT00000006705	-0.128394	4.90083	0.283354	0.594511	0.999516	Map4k5	ENSRNOG00000004923
1205	ENSRNOT00000006708	-0.0500425	4.63351	0.0417573	0.838083	0.999516	Cdkn2aipnl	ENSRNOG00000005024
1206	ENSRNOT00000006709	0.0211335	3.74068	0.00427543	0.947866	0.999516	Dock4	ENSRNOG00000004823
1207	ENSRNOT00000006720	0.168898	3.9802	0.403224	0.525429	0.999516	Med22	ENSRNOG00000005059
1208	ENSRNOT00000006725	0.191852	4.37181	0.544986	0.460374	0.999516	Zfp36l2	ENSRNOG00000005067
1209	ENSRNOT00000006734	-0.0941241	1.82897	0.0608762	0.805116	0.999516	Isca2-ps1	ENSRNOG00000005077
1210	ENSRNOT00000006741	0.401451	1.64467	0.502318	0.478483	0.999516	Sh3kbp1	ENSRNOG00000004322
1211	ENSRNOT00000006752	-0.100409	6.20828	0.226302	0.634279	0.999516	Tspan13	ENSRNOG00000005046
1212	ENSRNOT00000006753	-0.0180323	6.10554	0.00728575	0.931978	0.999516	Flii	ENSRNOG00000004159
1214	ENSRNOT00000006760	0.154121	1.44367	0.112438	0.737385	0.999516	Nup37	ENSRNOG00000004727
1215	ENSRNOT00000006764	-0.281447	2.14661	0.486112	0.485667	0.999516	Crhr1	ENSRNOG00000004900
1216	ENSRNOT00000006765	-0.119435	2.17472	0.102742	0.748563	0.999516	Upp1	ENSRNOG00000004972
1217	ENSRNOT00000006768	0.0953408	3.68365	0.114137	0.735482	0.999516	Eif2d	ENSRNOG00000004910
1218	ENSRNOT00000006771	0.0986579	4.5315	0.106267	0.744435	0.999516	Jakmip1	ENSRNOG00000004998
1219	ENSRNOT00000006774	-0.141634	2.01378	0.1454	0.70297	0.999516	Arl6ip6	ENSRNOG00000005074
1220	ENSRNOT00000006776	0.0377702	6.64978	0.0337948	0.854144	0.999516	Lpcat4	ENSRNOG00000005058
1221	ENSRNOT00000006777	-0.31279	5.48488	1.65152	0.198753	0.999516	Gpm6b	ENSRNOG00000004613
1222	ENSRNOT00000006780	-0.489942	4.16492	3.18998	0.074091	0.999516	Zcrb1	ENSRNOG00000004996
1223	ENSRNOT00000006783	-0.590383	0.3344	1.71057	0.190911	0.999516	Trhr	ENSRNOG00000005048
1224	ENSRNOT00000006784	0.240254	4.42894	0.817882	0.3658	0.999516	Rprm	ENSRNOG00000005109
1225	ENSRNOT00000006802	0.0162674	5.27613	0.00529983	0.941965	0.999516	Tmed4	ENSRNOG00000005016
1226	ENSRNOT00000006804	-0.143801	7.50079	0.514994	0.472985	0.999516	Crip2	ENSRNOG00000005041
1227	ENSRNOT00000006805	-0.00851896	3.72294	0.000867519	0.976503	0.999516	Bcorl1	ENSRNOG00000005076
1228	ENSRNOT00000006824	-0.138931	4.26323	0.24244	0.62245	0.999516	Cebpz	ENSRNOG00000005087
1229	ENSRNOT00000006827	-0.116662	4.91304	0.228294	0.632791	0.999516	Rnf215	ENSRNOG00000004940
1230	ENSRNOT00000006828	0.228445	1.5637	0.243856	0.621435	0.999516	Slc52a3	ENSRNOG00000005132
1231	ENSRNOT00000006830	0.0593673	5.72912	0.0765825	0.781983	0.999516	Birc6	ENSRNOG00000027191
1232	ENSRNOT00000006832	0.326539	2.94347	0.630481	0.427179	0.999516	Plekhh2	ENSRNOG00000005124
1233	ENSRNOT00000006833	-0.346547	0.848021	0.633971	0.425902	0.999516	Scrt2	ENSRNOG00000005148
1234	ENSRNOT00000006835	0.551028	2.18847	2.02101	0.155136	0.999516	Crip1	ENSRNOG00000027990
1235	ENSRNOT00000006841	0.404338	1.05921	1.18546	0.276248	0.999516	Uvssa	ENSRNOG00000005122
1236	ENSRNOT00000006852	0.0337438	3.73122	0.0143278	0.904722	0.999516	Hus1	ENSRNOG00000005141
1237	ENSRNOT00000006874	-0.19148	1.60974	0.257009	0.612183	0.999516	Ndufaf1	ENSRNOG00000005006
1238	ENSRNOT00000006883	-0.00141297	3.50515	1.97735e-05	0.996452	0.999516	Rangrf	ENSRNOG00000004980
1239	ENSRNOT00000006884	-0.0267463	4.66011	0.0117324	0.913745	0.999516	Rtfdc1	ENSRNOG00000005083
1240	ENSRNOT00000006886	-0.00802762	4.79627	0.000975123	0.975089	0.999516	Prdm4	ENSRNOG00000004962
1241	ENSRNOT00000006887	-0.324794	6.89258	1.99222	0.158109	0.999516	Nop10	ENSRNOG00000005184
1242	ENSRNOT00000006897	-0.168246	2.99141	0.191137	0.661972	0.999516	Vstm2a	ENSRNOG00000005180
1243	ENSRNOT00000006900	-0.408723	4.3776	2.23102	0.135265	0.999516	Snrpb2	ENSRNOG00000004967
1244	ENSRNOT00000006903	0.0312861	3.426	0.0106398	0.917844	0.999516	Washc3	ENSRNOG00000005102
1245	ENSRNOT00000006906	0.0858383	4.83598	0.0889063	0.765572	0.999516	Sec61g	ENSRNOG00000005203
1246	ENSRNOT00000006911	0.373255	1.85737	0.777795	0.377816	0.999516	Ccdc157	ENSRNOG00000005147
1247	ENSRNOT00000006913	-0.0237157	3.57823	0.0064318	0.936079	0.999516	Sgpp1	ENSRNOG00000005175
1248	ENSRNOT00000006917	-0.00513336	7.07615	0.000315903	0.985819	0.999516	Atp6v1c1	ENSRNOG00000004846
1249	ENSRNOT00000006921	-0.394212	-0.0860049	0.87349	0.349991	0.999516	Alkal2	ENSRNOG00000005154
1250	ENSRNOT00000006924	-0.0540927	0.721066	0.0200469	0.887406	0.999516	Cryzl2	ENSRNOG00000005177
1251	ENSRNOT00000006937	0.108749	0.669464	0.0522521	0.81919	0.999516	Orc4	ENSRNOG00000005021
1252	ENSRNOT00000006942	-0.205376	7.3602	1.0464	0.306338	0.999516	Ptprn2	ENSRNOG00000005003
1253	ENSRNOT00000006943	-0.332326	2.95912	0.528263	0.467338	0.999516	Nipal2	ENSRNOG00000005190
1254	ENSRNOT00000006946	0.153228	4.10673	0.269107	0.603932	0.999516	Gnptab	ENSRNOG00000005228
1256	ENSRNOT00000006953	0.0580971	3.77227	0.0450239	0.83196	0.999516	Dync2li1	ENSRNOG00000005151
1257	ENSRNOT00000006961	0.402821	3.47869	0.945478	0.330873	0.999516	Itgav	ENSRNOG00000004912
1258	ENSRNOT00000006963	0.0785596	3.89031	0.0812891	0.775558	0.999516	Acvr1	ENSRNOG00000005033
1259	ENSRNOT00000006966	0.0440242	0.473193	0.0112331	0.915593	0.999516	Fam135b	ENSRNOG00000005159
1260	ENSRNOT00000006969	-0.326753	1.85437	0.769653	0.380325	0.999516	Lgr6	ENSRNOG00000005093
1261	ENSRNOT00000006970	-0.635831	2.57671	3.37623	0.0661433	0.999516	Arid2	ENSRNOG00000004831
1262	ENSRNOT00000006979	0.191073	2.02693	0.265221	0.606556	0.999516	Tfap4	ENSRNOG00000005227
1263	ENSRNOT00000006984	0.0379025	4.35433	0.021529	0.883347	0.999516	Smcr8	ENSRNOG00000005165
1264	ENSRNOT00000006992	0.00456819	2.24872	0.000159553	0.989922	0.999516	Klhl4	ENSRNOG00000005215
1265	ENSRNOT00000006995	-0.525946	3.66031	3.19228	0.0739868	0.999516	Mia2	ENSRNOG00000005101
1266	ENSRNOT00000007000	0.0398214	4.07881	0.0220113	0.882057	0.999516	Ndufaf7	ENSRNOG00000005279
1267	ENSRNOT00000007002	0.0746971	4.10444	0.0735836	0.786189	0.999516	Slc1a4	ENSRNOG00000005248
1268	ENSRNOT00000007003	-0.416812	2.63685	1.31491	0.251507	0.999516	Scaf11	ENSRNOG00000005263
1269	ENSRNOT00000007004	0.072882	0.551424	0.0304767	0.861413	0.999516	Fbln5	ENSRNOG00000050539
1270	ENSRNOT00000007015	0.00927428	3.08678	0.000832763	0.976978	0.999516	Ebp	ENSRNOG00000004903
1271	ENSRNOT00000007018	-0.126455	5.52345	0.222293	0.637298	0.999516	Trim44	ENSRNOG00000005191
1272	ENSRNOT00000007061	-0.597352	2.15971	2.71684	0.0992943	0.999516	Trip11	ENSRNOG00000005292
1273	ENSRNOT00000007077	-0.144745	5.22409	0.334577	0.562977	0.999516	Fjx1	ENSRNOG00000005347
1274	ENSRNOT00000007087	0.271196	4.98672	0.988474	0.320116	0.999516	Pfas	ENSRNOG00000005193
1275	ENSRNOT00000007091	-0.139643	5.07438	0.26801	0.60467	0.999516	Csdc2	ENSRNOG00000005332
1276	ENSRNOT00000007100	-0.0712927	9.51482	0.14492	0.703438	0.999516	Ywhae	ENSRNOG00000005290
1277	ENSRNOT00000007104	-0.217345	6.03238	0.646018	0.42154	0.999516	Cnrip1	ENSRNOG00000005326
1278	ENSRNOT00000007110	0.165194	5.12224	0.40303	0.525529	0.999516	Ncln	ENSRNOG00000004793
1279	ENSRNOT00000007112	0.209762	5.36984	0.654514	0.418504	0.999516	Rapgef5	ENSRNOG00000005271
1280	ENSRNOT00000007115	0.297865	3.37485	0.949921	0.329739	0.999516	Tmem128	ENSRNOG00000005346
1281	ENSRNOT00000007130	0.425162	2.23874	1.11136	0.291786	0.999516	Tbc1d25	ENSRNOG00000005303
1282	ENSRNOT00000007133	0.182772	4.71365	0.514421	0.473231	0.999516	Nxph3	ENSRNOG00000005185
1283	ENSRNOT00000007154	-0.446482	2.60606	1.60784	0.204796	0.999516	Lyar	ENSRNOG00000005374
1284	ENSRNOT00000007158	-0.160792	4.86126	0.477809	0.489416	0.999516	Tmem11	ENSRNOG00000005377
1285	ENSRNOT00000007160	0.487769	2.75987	0.939246	0.332472	0.999516	Klhl29	ENSRNOG00000005371
1286	ENSRNOT00000007164	-0.333633	5.37233	2.06948	0.150273	0.999516	Pmm1	ENSRNOG00000005358
1287	ENSRNOT00000007169	-0.000340354	3.97806	1.61132e-06	0.998987	0.999516	Nol10	ENSRNOG00000005344
1288	ENSRNOT00000007175	-0.295801	10.5064	2.22172	0.136082	0.999516	Cst3	ENSRNOG00000005195
1289	ENSRNOT00000007181	0.149801	5.35193	0.467347	0.49421	0.999516	Maea	ENSRNOG00000005397
1290	ENSRNOT00000007185	-0.0766231	4.69298	0.0915381	0.762231	0.999516	LOC120102351	ENSRNOG00000005353
1291	ENSRNOT00000007197	-0.427266	1.29159	1.22973	0.26746	0.999516	Csrnp3	ENSRNOG00000005359
1292	ENSRNOT00000007202	0.200761	1.58468	0.288744	0.591027	0.999516	Gna15	ENSRNOG00000005378
1293	ENSRNOT00000007219	0.0792178	3.91614	0.0829691	0.773313	0.999516	Egln3	ENSRNOG00000005053
1294	ENSRNOT00000007223	0.149105	5.08193	0.422346	0.515769	0.999516	Sacm1l	ENSRNOG00000005149
1295	ENSRNOT00000007246	0.0224793	4.39238	0.00731166	0.931857	0.999516	Recql5	ENSRNOG00000005107
1296	ENSRNOT00000007247	0.157759	6.99533	0.614787	0.432991	0.999516	Itpka	ENSRNOG00000005284
1297	ENSRNOT00000007249	-0.00415518	6.04823	0.000188611	0.989043	0.999516	Pcsk2	ENSRNOG00000005438
1298	ENSRNOT00000007255	-0.180535	2.78277	0.109668	0.740522	0.999516	Sdc2	ENSRNOG00000004936
1299	ENSRNOT00000007258	0.595043	2.13643	1.5178	0.217953	0.999516	Rab3ip	ENSRNOG00000005362
1300	ENSRNOT00000007259	0.151397	5.31212	0.481411	0.487784	0.999516	Odc1	ENSRNOG00000005424
1301	ENSRNOT00000007261	-0.15042	3.48353	0.266157	0.605922	0.999516	Snupn	ENSRNOG00000005426
1302	ENSRNOT00000007267	0.267795	1.66846	0.481911	0.487558	0.999516	Lsm11	ENSRNOG00000005450
1303	ENSRNOT00000007274	0.0480224	7.28607	0.0556139	0.813568	0.999516	Lamp5	ENSRNOG00000005457
1305	ENSRNOT00000007285	-0.0328142	0.911313	0.00723137	0.932232	0.999516	Mad2l1	ENSRNOG00000005376
1306	ENSRNOT00000007287	-0.374679	4.66388	2.13286	0.144172	0.999516	Acp1	ENSRNOG00000005260
1307	ENSRNOT00000007295	0.33725	3.5349	1.39543	0.237491	0.999516	Rassf3	ENSRNOG00000005388
1308	ENSRNOT00000007298	0.07068	5.88387	0.117906	0.731317	0.999516	Dlst	ENSRNOG00000005061
1309	ENSRNOT00000007299	0.117646	3.5588	0.150023	0.698514	0.999516	Rpap1	ENSRNOG00000005483
1310	ENSRNOT00000007300	0.116165	2.21326	0.076038	0.78274	0.999516	Snx6	ENSRNOG00000005249
1311	ENSRNOT00000007312	-0.322045	3.27299	0.842227	0.358761	0.999516	Rhbdl3	ENSRNOG00000005515
1312	ENSRNOT00000007314	0.0315642	3.43699	0.0118292	0.913391	0.999516	Sav1	ENSRNOG00000005264
1313	ENSRNOT00000007332	-0.474089	0.890648	1.42743	0.232184	0.999516	Rtcb-ps1	ENSRNOG00000005546
1314	ENSRNOT00000007333	0.0851218	0.717587	0.0528721	0.818139	0.999516	Irf6	ENSRNOG00000005082
1315	ENSRNOT00000007351	-0.274314	4.25647	0.797902	0.371721	0.999516	Snrpf	ENSRNOG00000005556
1316	ENSRNOT00000007358	0.114379	0.169618	0.0680515	0.794195	0.999516	Adamts8	ENSRNOG00000005574
1317	ENSRNOT00000007362	-0.00210465	5.27651	8.4382e-05	0.992671	0.999516	Sap30bp	ENSRNOG00000005482
1318	ENSRNOT00000007365	-0.0739458	3.57735	0.0450996	0.831821	0.999516	Coch	ENSRNOG00000005286
1319	ENSRNOT00000007367	0.0561331	4.6719	0.0484753	0.825738	0.999516	Rbm3	ENSRNOG00000005387
1320	ENSRNOT00000007369	0.0415392	5.25998	0.0307967	0.860695	0.999516	AABR07064804.1	ENSRNOG00000005568
1321	ENSRNOT00000007374	-0.00973852	5.88009	0.00189515	0.965276	0.999516	Hpcal1	ENSRNOG00000005492
1322	ENSRNOT00000007379	-0.0280855	1.62677	0.00368392	0.951602	0.999516	Ypel2	ENSRNOG00000005447
1323	ENSRNOT00000007402	-0.411685	4.69576	1.85808	0.172846	0.999516	Wbp11l1	ENSRNOG00000005505
1324	ENSRNOT00000007404	0.426499	1.63731	1.0879	0.296938	0.999516	Acvr2a	ENSRNOG00000005334
1325	ENSRNOT00000007410	-0.261333	4.54473	0.97843	0.322587	0.999516	Pak5	ENSRNOG00000005509
1326	ENSRNOT00000007412	0.157363	0.223826	0.101523	0.750009	0.999516	Ntn4	ENSRNOG00000005573
1327	ENSRNOT00000007414	-0.0688287	4.6783	0.0803412	0.776836	0.999516	Bzw2	ENSRNOG00000005096
1328	ENSRNOT00000007424	0.102112	4.13745	0.117746	0.731493	0.999516	Desi1	ENSRNOG00000005577
1329	ENSRNOT00000007427	0.299654	3.54008	1.04088	0.307616	0.999516	Ybx3	ENSRNOG00000005480
1330	ENSRNOT00000007428	0.150636	1.47715	0.160009	0.689148	0.999516	Cyp4f5	ENSRNOG00000042496
1331	ENSRNOT00000007430	-0.185923	4.86315	0.578562	0.446877	0.999516	Rida	ENSRNOG00000005437
1332	ENSRNOT00000007437	0.0662216	6.72711	0.072179	0.78819	0.999516	AABR07060778.1	ENSRNOG00000005630
1333	ENSRNOT00000007447	-0.0602414	2.4434	0.0216984	0.882892	0.999516	Ctc1	ENSRNOG00000005357
1334	ENSRNOT00000007449	-0.414337	2.94896	1.49697	0.221139	0.999516	Lingo2	ENSRNOG00000005634
1335	ENSRNOT00000007455	-0.0657913	6.31605	0.0982582	0.75393	0.999516	Brinp2	ENSRNOG00000005592
1336	ENSRNOT00000007461	0.171354	3.63012	0.345797	0.556502	0.999516	Trhde	ENSRNOG00000005278
1337	ENSRNOT00000007464	0.0787248	7.11421	0.156239	0.692643	0.999516	Wdr13	ENSRNOG00000039587
1338	ENSRNOT00000007471	-0.0234192	2.51148	0.00428504	0.947808	0.999516	Hnmt	ENSRNOG00000005223
1339	ENSRNOT00000007472	0.00968696	4.26904	0.0013328	0.970878	0.999516	Frs2	ENSRNOG00000005642
1340	ENSRNOT00000007476	-0.105069	3.15538	0.102574	0.748762	0.999516	Ing3	ENSRNOG00000005496
1341	ENSRNOT00000007484	0.254102	4.78805	0.978231	0.322636	0.999516	Derl1	ENSRNOG00000005551
1342	ENSRNOT00000007498	0.00645091	1.61751	0.000142	0.990492	0.999516	Gna11	ENSRNOG00000005446
1343	ENSRNOT00000007523	0.191967	1.43466	0.18997	0.662942	0.999516	Lmcd1	ENSRNOG00000005690
1344	ENSRNOT00000007529	0.121047	2.78885	0.119897	0.729146	0.999516	Nin	ENSRNOG00000005540
1345	ENSRNOT00000007539	-0.0397616	0.689038	0.0117773	0.913581	0.999516	Zbtb44	ENSRNOG00000005578
1346	ENSRNOT00000007544	-0.332822	4.04906	1.26685	0.260358	0.999516	Fmc1	ENSRNOG00000005618
1347	ENSRNOT00000007549	-0.0648483	3.42667	0.0462422	0.829736	0.999516	Pwp1	ENSRNOG00000005350
1348	ENSRNOT00000007554	0.198678	5.94888	0.949107	0.329947	0.999516	Vapb	ENSRNOG00000005331
1349	ENSRNOT00000007567	0.283084	2.4097	0.38162	0.536738	0.999516	Ndufa4	ENSRNOG00000005512
1350	ENSRNOT00000007572	-0.0336125	3.6492	0.0141191	0.905415	0.999516	Grm3	ENSRNOG00000005519
1351	ENSRNOT00000007577	0.0171467	3.57466	0.00316112	0.955163	0.999516	Mgp	ENSRNOG00000005695
1352	ENSRNOT00000007578	-0.0550176	5.31766	0.0385485	0.844346	0.999516	Brinp1	ENSRNOG00000005561
1353	ENSRNOT00000007580	-0.115181	3.93854	0.179685	0.671644	0.999516	Yeats4	ENSRNOG00000005689
1354	ENSRNOT00000007583	-0.280539	4.42713	0.694582	0.40461	0.999516	Srsf5	ENSRNOG00000005513
1355	ENSRNOT00000007598	-0.325765	2.9324	0.942786	0.331562	0.999516	Foxred2	ENSRNOG00000005749
1356	ENSRNOT00000007600	-0.250445	5.18091	1.12735	0.288341	0.999516	Lrfn5	ENSRNOG00000005550
1357	ENSRNOT00000007607	0.0866689	2.44309	0.0497077	0.823573	0.999516	Yipf4	ENSRNOG00000005610
1359	ENSRNOT00000007609	-0.0267988	9.62856	0.0196223	0.888597	0.999516	Vsnl1	ENSRNOG00000005345
1360	ENSRNOT00000007612	-0.0241306	6.57188	0.0126338	0.910506	0.999516	Emc4	ENSRNOG00000005719
1361	ENSRNOT00000007620	-0.272719	5.40452	0.558826	0.454734	0.999516	Cul1	ENSRNOG00000005310
1362	ENSRNOT00000007621	0.0270377	5.45301	0.00627198	0.936877	0.999516	Ppp2ca	ENSRNOG00000005389
1363	ENSRNOT00000007623	-0.385989	0.529577	0.783391	0.376106	0.999516	Arl1	ENSRNOG00000005763
1364	ENSRNOT00000007624	-0.245238	6.53291	1.34563	0.246043	0.999516	Suclg1	ENSRNOG00000005587
1365	ENSRNOT00000007634	0.0907859	4.14191	0.113554	0.736134	0.999516	Tulp3	ENSRNOG00000005767
1366	ENSRNOT00000007640	-0.0902874	3.04448	0.0640637	0.800185	0.999516	Adamts13	ENSRNOG00000005780
1367	ENSRNOT00000007641	0.227633	2.04392	0.327119	0.56736	0.999516	Stx17	ENSRNOG00000005801
1368	ENSRNOT00000007645	0.0473417	4.64167	0.0351602	0.85126	0.999516	Dhrs7	ENSRNOG00000005589
1369	ENSRNOT00000007660	-0.101725	7.34225	0.260076	0.610068	0.999516	Astn1	ENSRNOG00000005667
1370	ENSRNOT00000007662	-0.112847	2.93056	0.118899	0.730232	0.999516	Neurod1	ENSRNOG00000005609
1371	ENSRNOT00000007672	-0.125907	3.14925	0.159687	0.689444	0.999516	Lrrc3b	ENSRNOG00000005857
1372	ENSRNOT00000007676	-0.0539109	8.26634	0.0681093	0.79411	0.999516	Skp1	ENSRNOG00000005828
1373	ENSRNOT00000007687	0.383062	3.89737	0.62162	0.430446	0.999516	Rasgrp1	ENSRNOG00000005404
1374	ENSRNOT00000007698	-0.221168	2.92675	0.458021	0.49855	0.999516	Gadd45a	ENSRNOG00000005615
1375	ENSRNOT00000007710	0.153575	3.11833	0.20361	0.651822	0.999516	Cdk5rap2	ENSRNOG00000005788
1376	ENSRNOT00000007711	0.0622469	4.58271	0.0648441	0.798997	0.999516	Erp44	ENSRNOG00000005841
1377	ENSRNOT00000007721	0.0198234	9.13244	0.0112897	0.915382	0.999516	Kif5a	ENSRNOG00000005299
1378	ENSRNOT00000007727	-0.229885	1.28981	0.310847	0.577161	0.999516	Bfsp1	ENSRNOG00000005707
1379	ENSRNOT00000007736	-0.116359	4.00164	0.192526	0.660822	0.999516	Rbm7	ENSRNOG00000005710
1380	ENSRNOT00000007747	-0.415201	5.73185	3.11065	0.077782	0.999516	Lyz2	ENSRNOG00000005825
1381	ENSRNOT00000007754	0.24411	1.38439	0.374657	0.540476	0.999516	C8h11orf71	ENSRNOG00000005918
1382	ENSRNOT00000007761	-0.181913	2.37138	0.237255	0.626196	0.999516	Zfp362	ENSRNOG00000043364
1383	ENSRNOT00000007763	0.00121389	4.36125	1.83848e-05	0.996579	0.999516	Eif2b4	ENSRNOG00000005301
1385	ENSRNOT00000007768	-0.300287	1.97399	0.550203	0.458235	0.999516	Ncoa3	ENSRNOG00000005616
1386	ENSRNOT00000007771	0.201632	2.02479	0.227859	0.633116	0.999516	Creb3l1	ENSRNOG00000005413
1387	ENSRNOT00000007773	0.114896	4.55645	0.102075	0.749353	0.999516	Them6	ENSRNOG00000005929
1388	ENSRNOT00000007779	0.274117	3.29187	0.740457	0.389514	0.999516	Arhgdib	ENSRNOG00000005809
1389	ENSRNOT00000007789	0.0236561	0.474221	0.00344234	0.953214	0.999516	Nnmt	ENSRNOG00000005930
1390	ENSRNOT00000007790	0.627299	0.522638	2.2676	0.132104	0.999516	Pgf	ENSRNOG00000005650
1391	ENSRNOT00000007794	0.0606992	6.75733	0.0883737	0.766255	0.999516	Dstn	ENSRNOG00000005924
1392	ENSRNOT00000007795	0.361711	0.729858	0.910113	0.340085	0.999516	Nek10	ENSRNOG00000005883
1393	ENSRNOT00000007802	-0.0520273	1.55652	0.015858	0.899788	0.999516	Car8	ENSRNOG00000005669
1394	ENSRNOT00000007812	-0.191552	2.41874	0.230896	0.63086	0.999516	Megf9	ENSRNOG00000005932
1395	ENSRNOT00000007816	-0.247776	2.00227	0.457222	0.498925	0.999516	Erich5	ENSRNOG00000005956
1396	ENSRNOT00000007821	0.392026	3.12877	1.2749	0.258849	0.999516	Fkbp9	ENSRNOG00000005478
1397	ENSRNOT00000007822	0.0828377	0.268605	0.0377975	0.84585	0.999516	Wnt16	ENSRNOG00000005781
1398	ENSRNOT00000007824	0.0525159	3.51807	0.0336955	0.854356	0.999516	Pno1	ENSRNOG00000005524
1399	ENSRNOT00000007851	0.485318	0.788754	1.31612	0.25129	0.999516	A3galt2	ENSRNOG00000005935
1400	ENSRNOT00000007859	0.0544448	3.8492	0.0371909	0.847077	0.999516	Leprot	ENSRNOG00000050849
1401	ENSRNOT00000007866	0.365835	3.34528	1.3794	0.240204	0.999516	Yap1	ENSRNOG00000005933
1402	ENSRNOT00000007870	-0.173861	4.71984	0.469335	0.493293	0.999516	Hsd11b1	ENSRNOG00000005861
1404	ENSRNOT00000007879	-0.0397283	2.60249	0.0134004	0.907843	0.999516	G0s2	ENSRNOG00000006019
1405	ENSRNOT00000007882	-0.152399	2.70572	0.203098	0.652232	0.999516	Gpr176	ENSRNOG00000005971
1406	ENSRNOT00000007889	-0.364761	0.826708	0.906326	0.341091	0.999516	Etv6	ENSRNOG00000005984
1407	ENSRNOT00000007897	-0.330565	1.76728	0.732399	0.392107	0.999516	Abi3	ENSRNOG00000005575
1408	ENSRNOT00000007914	-0.151543	4.79334	0.229694	0.631751	0.999516	Tmx2	ENSRNOG00000005308
1409	ENSRNOT00000007917	0.100768	2.88347	0.0852603	0.770291	0.999516	Thg1l	ENSRNOG00000005539
1410	ENSRNOT00000007919	-0.0277905	3.17009	0.00773817	0.929903	0.999516	Slc30a6	ENSRNOG00000005856
1411	ENSRNOT00000007927	0.556446	3.06212	2.47066	0.115989	0.999516	Rpia	ENSRNOG00000005576
1412	ENSRNOT00000007940	0.0693861	4.68057	0.0785448	0.779279	0.999516	Ankib1	ENSRNOG00000005502
1413	ENSRNOT00000007948	-0.246776	5.04311	1.15357	0.282804	0.999516	Dmtf1	ENSRNOG00000005908
1414	ENSRNOT00000007954	0.859715	3.59207	3.24783	0.0715182	0.999516	Tubgcp6	ENSRNOG00000006028
1415	ENSRNOT00000007957	0.147711	0.0202789	0.111835	0.738064	0.999516	Grin3a	ENSRNOG00000005723
1416	ENSRNOT00000007971	0.349267	0.917438	0.49882	0.480019	0.999516	Ctnna2	ENSRNOG00000006003
1417	ENSRNOT00000007977	-0.0674542	2.3689	0.0352517	0.851069	0.999516	Steap2	ENSRNOG00000006076
1418	ENSRNOT00000007979	0.351272	0.50213	0.759197	0.38358	0.999516	Angpt1	ENSRNOG00000005854
1419	ENSRNOT00000007984	-0.273188	-0.379078	0.377518	0.538935	0.999516	Tacr1	ENSRNOG00000005853
1420	ENSRNOT00000007993	-0.191751	4.71179	0.586373	0.443825	0.999516	LRRTM1	ENSRNOG00000006093
1421	ENSRNOT00000007994	0.038755	5.57576	0.0310485	0.860132	0.999516	Gdap1	ENSRNOG00000005850
1423	ENSRNOT00000007999	-0.843111	4.05588	4.29745	0.0381697	0.999516	Azin1	ENSRNOG00000005333
1424	ENSRNOT00000008008	-0.158191	7.29841	0.61529	0.432803	0.999516	Rhob	ENSRNOG00000021403
1425	ENSRNOT00000008030	-0.148742	6.53673	0.513976	0.473423	0.999516	Nsg1	ENSRNOG00000005700
1426	ENSRNOT00000008034	0.206059	3.96251	0.608328	0.435418	0.999516	Slc2a6	ENSRNOG00000005900
1427	ENSRNOT00000008035	-0.0631618	3.4287	0.0446689	0.832614	0.999516	Oxsm	ENSRNOG00000005993
1428	ENSRNOT00000008041	-0.0914382	5.8603	0.209362	0.647268	0.999516	Ctnna1	ENSRNOG00000005796
1429	ENSRNOT00000008045	-0.126828	0.409403	0.110664	0.73939	0.999516	Rmdn2	ENSRNOG00000006082
1430	ENSRNOT00000008046	0.280792	1.52844	0.30135	0.583037	0.999516	Itprid2	ENSRNOG00000005865
1431	ENSRNOT00000008055	-0.417634	2.2904	1.06168	0.302833	0.999516	Rassf5	ENSRNOG00000005342
1432	ENSRNOT00000008057	0.315389	2.60172	0.826119	0.363397	0.999516	C1d	ENSRNOG00000005982
1433	ENSRNOT00000008062	0.0737725	3.80716	0.0711863	0.789617	0.999516	Aasdhppt	ENSRNOG00000005795
1434	ENSRNOT00000008071	-0.187846	0.757242	0.172785	0.677648	0.999516	Stk35	ENSRNOG00000006002
1435	ENSRNOT00000008104	-0.165156	4.92645	0.38589	0.534468	0.999516	Rfx1	ENSRNOG00000006049
1436	ENSRNOT00000008107	0.0873028	2.65705	0.0641743	0.800016	0.999516	Smg8	ENSRNOG00000005769
1437	ENSRNOT00000008113	0.317047	4.25872	1.32899	0.248986	0.999516	Trim54	ENSRNOG00000006146
1438	ENSRNOT00000008119	0.269959	5.67393	1.43271	0.231323	0.999516	C10h5orf15	ENSRNOG00000006148
1439	ENSRNOT00000008126	-0.226142	6.50971	1.18835	0.275662	0.999516	Slc30a3	ENSRNOG00000006204
1440	ENSRNOT00000008135	-0.309232	2.18809	0.748539	0.386939	0.999516	Etaa1l1	ENSRNOG00000006185
1441	ENSRNOT00000008138	0.711069	3.14412	4.56793	0.0325759	0.999516	Slc38a1	ENSRNOG00000005291
1442	ENSRNOT00000008150	0.873306	2.27473	2.8753	0.0899484	0.999516	Ncstn	ENSRNOG00000005355
1443	ENSRNOT00000008153	-0.415204	0.818306	0.846067	0.357667	0.999516	Jph1	ENSRNOG00000006110
1444	ENSRNOT00000008159	-0.0431936	2.31742	0.015358	0.901373	0.999516	Tmem117	ENSRNOG00000006068
1445	ENSRNOT00000008164	-0.0716714	7.58537	0.132096	0.716269	0.999516	Arl8a	ENSRNOG00000005988
1446	ENSRNOT00000008168	-0.222925	3.10783	0.463592	0.49595	0.999516	Wdsub1	ENSRNOG00000005990
1447	ENSRNOT00000008184	0.00159078	3.0947	2.35566e-05	0.996127	0.999516	Adam19	ENSRNOG00000042980
1448	ENSRNOT00000008193	-0.0756465	5.97408	0.144937	0.703421	0.999516	Cpsf6	ENSRNOG00000005927
1449	ENSRNOT00000008200	-0.127614	6.09488	0.412604	0.520651	0.999516	Lrpprc	ENSRNOG00000005877
1450	ENSRNOT00000008210	-0.223909	7.12144	0.900886	0.342544	0.999516	Sptbn1	ENSRNOG00000005434
1451	ENSRNOT00000008211	0.0116211	3.8868	0.0017186	0.966932	0.999516	Cpq	ENSRNOG00000005931
1452	ENSRNOT00000008221	0.0674309	2.49769	0.0309399	0.860375	0.999516	Cntn3	ENSRNOG00000006144
1453	ENSRNOT00000008238	0.104121	5.21976	0.207966	0.648366	0.999516	Ppm1a	ENSRNOG00000005916
1454	ENSRNOT00000008253	0.248699	3.13486	0.618029	0.431781	0.999516	Traf2	ENSRNOG00000006238
1455	ENSRNOT00000008254	0.26099	1.86405	0.485821	0.485797	0.999516	Dsn1	ENSRNOG00000006236
1456	ENSRNOT00000008256	-0.00714009	2.43985	0.000367712	0.984701	0.999516	Cdk12	ENSRNOG00000006000
1457	ENSRNOT00000008262	0.31108	1.45871	0.680834	0.4093	0.999516	Spon2	ENSRNOG00000006033
1458	ENSRNOT00000008274	0.0719232	4.55095	0.0540186	0.816213	0.999516	Lgalsl	ENSRNOG00000005464
1459	ENSRNOT00000008276	0.413062	6.79128	3.23077	0.0722668	0.999516	LOC100359922	ENSRNOG00000006283
1460	ENSRNOT00000008281	-0.209242	1.41008	0.287549	0.591795	0.999516	Cpne3	ENSRNOG00000006298
1461	ENSRNOT00000008282	-0.0156627	6.1617	0.00522088	0.942398	0.999516	Gpr37l1	ENSRNOG00000006237
1462	ENSRNOT00000008285	0.00284066	7.31759	0.000206887	0.988524	0.999516	Fez1	ENSRNOG00000006075
1463	ENSRNOT00000008289	-0.00313618	4.19272	0.000101845	0.991948	0.999516	Ngly1	ENSRNOG00000006143
1464	ENSRNOT00000008302	0.241896	4.29951	0.388764	0.53295	0.999516	Nr4a3	ENSRNOG00000005964
1466	ENSRNOT00000008317	0.120865	4.06178	0.189055	0.663704	0.999516	Utp20	ENSRNOG00000005823
1467	ENSRNOT00000008329	-0.145223	4.58103	0.295296	0.586847	0.999516	Sec61b	ENSRNOG00000006345
1468	ENSRNOT00000008337	-0.0361371	4.10819	0.0193532	0.889359	0.999516	Aco1	ENSRNOG00000005849
1469	ENSRNOT00000008342	0.0580124	1.10495	0.0182445	0.892555	0.999516	Slc6a11	ENSRNOG00000005697
1470	ENSRNOT00000008355	0.0568078	5.68197	0.0735576	0.786226	0.999516	Sf3a1	ENSRNOG00000005218
1471	ENSRNOT00000008356	0.0932624	3.8362	0.0653376	0.79825	0.999516	Calu	ENSRNOG00000006197
1472	ENSRNOT00000008364	-0.0326176	6.12667	0.0240722	0.876701	0.999516	Emc7	ENSRNOG00000005884
1473	ENSRNOT00000008372	0.0534821	4.85248	0.0516297	0.820251	0.999516	Txndc16	ENSRNOG00000006334
1474	ENSRNOT00000008382	0.340772	1.18343	0.793972	0.372902	0.999516	RGD1310852	ENSRNOG00000006370
1475	ENSRNOT00000008399	0.267027	1.5802	0.336889	0.561631	0.999516	Suv39h1	ENSRNOG00000039576
1476	ENSRNOT00000008410	-0.250469	2.05043	0.231396	0.63049	0.999516	Stx18	ENSRNOG00000006139
1477	ENSRNOT00000008427	0.0940381	6.18846	0.224489	0.63564	0.999516	Srsf6	ENSRNOG00000006380
1478	ENSRNOT00000008440	0.438904	0.13232	1.09476	0.295419	0.999516	Lamb3	ENSRNOG00000006025
1479	ENSRNOT00000008450	0.0970368	2.68124	0.0620908	0.803221	0.999516	Ift27	ENSRNOG00000006440
1480	ENSRNOT00000008451	-0.0246161	3.71666	0.00753897	0.930809	0.999516	Eif2ak3	ENSRNOG00000006069
1481	ENSRNOT00000008454	-0.0177355	4.88691	0.00509728	0.943083	0.999516	Zhx1	ENSRNOG00000006412
1482	ENSRNOT00000008459	0.248014	4.68836	0.612873	0.433708	0.999516	Hectd1	ENSRNOG00000006905
1483	ENSRNOT00000008471	-0.0896229	3.99209	0.10041	0.751338	0.999516	Kitlg	ENSRNOG00000005386
1484	ENSRNOT00000008477	-0.185408	8.3192	0.856111	0.354829	0.999516	Vdac1	ENSRNOG00000006375
1485	ENSRNOT00000008504	-0.272145	4.32506	0.918596	0.337844	0.999516	Hspa2	ENSRNOG00000006472
1486	ENSRNOT00000008507	0.0312938	4.41829	0.0152354	0.901765	0.999516	Borcs6	ENSRNOG00000006513
1487	ENSRNOT00000008509	0.0310029	5.32481	0.0191445	0.889953	0.999516	Eif1ax	ENSRNOG00000005736
1488	ENSRNOT00000008525	0.0321252	4.17248	0.0134827	0.907561	0.999516	Galk1	ENSRNOG00000006359
1490	ENSRNOT00000008553	-0.0578685	4.12824	0.0473332	0.82777	0.999516	Ecd	ENSRNOG00000042253
1491	ENSRNOT00000008557	-0.0386019	5.01126	0.0258942	0.872159	0.999516	Luc7l2	ENSRNOG00000006001
1492	ENSRNOT00000008560	0.142174	6.10438	0.225105	0.635177	0.999516	Akap8l	ENSRNOG00000006355
1493	ENSRNOT00000008566	-0.0797598	5.31378	0.117604	0.731647	0.999516	Mtmr2	ENSRNOG00000005923
1494	ENSRNOT00000008573	-0.0705939	5.13482	0.0389019	0.843643	0.999516	Plekhg3	ENSRNOG00000006570
1495	ENSRNOT00000008585	-0.291955	4.21903	1.08332	0.297956	0.999516	Smarcad1	ENSRNOG00000006391
1496	ENSRNOT00000008601	-0.0408055	0.321016	0.0108754	0.916943	0.999516	Ccdc96	ENSRNOG00000006575
1497	ENSRNOT00000008608	-0.314785	8.38141	1.73858	0.187319	0.999516	Mif	ENSRNOG00000006589
1498	ENSRNOT00000008612	-0.166362	4.65902	0.460139	0.497559	0.999516	Cpsf2	ENSRNOG00000005733
1499	ENSRNOT00000008614	-0.180586	5.39557	0.531308	0.466057	0.999516	Nectin1	ENSRNOG00000006403
1500	ENSRNOT00000008637	-0.100253	3.34784	0.0748735	0.784369	0.999516	Pclo	ENSRNOG00000005726
1501	ENSRNOT00000008645	-0.090648	4.80003	0.129047	0.719422	0.999516	Borcs5	ENSRNOG00000006505
1503	ENSRNOT00000008673	0.222419	4.23586	0.550918	0.457943	0.999516	Acvrl1	ENSRNOG00000028713
1504	ENSRNOT00000008677	-0.145266	5.04506	0.35793	0.549658	0.999516	Tmem106b	ENSRNOG00000006206
1505	ENSRNOT00000008679	0.491482	2.79009	1.38333	0.239534	0.999516	Map2k3	ENSRNOG00000065992
1506	ENSRNOT00000008680	0.0603634	4.43601	0.0577691	0.810057	0.999516	Tmem70	ENSRNOG00000006608
1507	ENSRNOT00000008685	-0.0407817	9.4652	0.0468456	0.828646	0.999516	Thy1	ENSRNOG00000006604
1508	ENSRNOT00000008688	-0.192464	3.81409	0.487342	0.485115	0.999516	Cntnap2	ENSRNOG00000006617
1509	ENSRNOT00000008698	0.0911388	2.65621	0.0666368	0.796298	0.999516	Thnsl2	ENSRNOG00000006508
1510	ENSRNOT00000008713	0.279817	1.93027	0.597858	0.439396	0.999516	Tbc1d20	ENSRNOG00000005766
1511	ENSRNOT00000008725	0.187554	3.55497	0.376941	0.539245	0.999516	Otud6b	ENSRNOG00000006636
1512	ENSRNOT00000008728	0.591671	1.71956	1.58416	0.208163	0.999516	Pdia4	ENSRNOG00000006228
1513	ENSRNOT00000008730	0.107292	4.15719	0.118433	0.730741	0.999516	Eif2b2	ENSRNOG00000006467
1514	ENSRNOT00000008734	-0.0251797	11.1885	0.0178236	0.893794	0.999516	Snap25	ENSRNOG00000006037
1515	ENSRNOT00000008736	-0.0425847	9.7038	0.0442647	0.833362	0.999516	Atp6v0c	ENSRNOG00000006542
1516	ENSRNOT00000008737	0.279178	4.49543	0.897275	0.343513	0.999516	Fkbp4	ENSRNOG00000006444
1517	ENSRNOT00000008758	0.00323397	4.63071	0.000179484	0.989311	0.999516	Sirt6	ENSRNOG00000006393
1518	ENSRNOT00000008764	-0.00246613	1.85735	4.58273e-05	0.994599	0.999516	Rbm38	ENSRNOG00000006420
1519	ENSRNOT00000008785	0.24698	3.35984	0.686967	0.407198	0.999516	Ntaq1	ENSRNOG00000006700
1520	ENSRNOT00000008786	0.151762	4.60343	0.349124	0.554609	0.999516	Dcaf15	ENSRNOG00000006551
1521	ENSRNOT00000008787	-0.25158	2.12693	0.463893	0.49581	0.999516	Tmem107	ENSRNOG00000006519
1522	ENSRNOT00000008788	0.124468	3.93478	0.208131	0.648236	0.999516	Tbc1d10a	ENSRNOG00000006394
1523	ENSRNOT00000008813	-0.153082	2.14347	0.158218	0.690803	0.999516	Hk2	ENSRNOG00000006116
1524	ENSRNOT00000008819	-0.0646226	3.54995	0.049436	0.824048	0.999516	Xrcc6	ENSRNOG00000006392
1525	ENSRNOT00000008827	0.0725846	5.44497	0.0665424	0.796439	0.999516	Akap8	ENSRNOG00000006559
1526	ENSRNOT00000008854	0.0399578	5.84028	0.0332768	0.855254	0.999516	Mbd6	ENSRNOG00000006209
1527	ENSRNOT00000008868	-0.0478802	4.2889	0.034662	0.852306	0.999516	Rab33a	ENSRNOG00000006698
1528	ENSRNOT00000008873	-0.555816	4.4493	4.31526	0.0377719	0.999516	Crbn	ENSRNOG00000006534
1529	ENSRNOT00000008877	0.0352552	5.64984	0.0279899	0.867133	0.999516	Cops5	ENSRNOG00000006499
1530	ENSRNOT00000008879	0.164341	3.90339	0.355754	0.550874	0.999516	Lrrn1	ENSRNOG00000006802
1531	ENSRNOT00000008882	-0.0754009	3.30069	0.0553723	0.813966	0.999516	Ankrd24	ENSRNOG00000006759
1532	ENSRNOT00000008883	0.113411	5.30307	0.268152	0.604574	0.999516	Pgap4	ENSRNOG00000006800
1533	ENSRNOT00000008886	-0.533002	1.60075	1.98598	0.158762	0.999516	Slc24a4	ENSRNOG00000006729
1534	ENSRNOT00000008887	-0.0268176	1.7185	0.00509926	0.943072	0.999516	Zscan20	ENSRNOG00000005886
1535	ENSRNOT00000008888	-0.0243755	3.20355	0.00545244	0.941137	0.999516	Nup210	ENSRNOG00000005390
1536	ENSRNOT00000008893	-0.11057	4.28958	0.159683	0.689448	0.999516	Uba3	ENSRNOG00000006221
1537	ENSRNOT00000008901	-0.281947	2.76147	0.594365	0.440736	0.999516	Chd7	ENSRNOG00000006689
1538	ENSRNOT00000008911	-0.27494	3.96517	0.871677	0.350491	0.999516	Med19	ENSRNOG00000006050
1539	ENSRNOT00000008913	-0.0616582	6.7755	0.0894627	0.764861	0.999516	Alg2	ENSRNOG00000006369
1540	ENSRNOT00000008919	0.00799912	3.97186	0.000868864	0.976485	0.999516	Papolg	ENSRNOG00000006261
1541	ENSRNOT00000008929	0.319352	1.78719	0.663861	0.4152	0.999516	Tmem198b	ENSRNOG00000006827
1542	ENSRNOT00000008931	-0.0739275	4.49236	0.0762731	0.782413	0.999516	Apmap	ENSRNOG00000006795
1543	ENSRNOT00000008932	0.284697	3.58895	0.673122	0.411965	0.999516	Grpel1	ENSRNOG00000006593
1544	ENSRNOT00000008936	0.214264	0.257362	0.241605	0.623049	0.999516	Sema3e	ENSRNOG00000006631
1545	ENSRNOT00000008940	0.051174	5.53639	0.0597694	0.806861	0.999516	Rcc2	ENSRNOG00000006327
1546	ENSRNOT00000008941	0.161631	4.45853	0.32288	0.569882	0.999516	Ddit3	ENSRNOG00000006789
1547	ENSRNOT00000008954	0.459648	0.481272	1.4713	0.225141	0.999516	Cox16	ENSRNOG00000047115
1548	ENSRNOT00000008962	0.201729	5.1503	0.477913	0.489369	0.999516	Hdac11	ENSRNOG00000006824
1549	ENSRNOT00000008963	-0.36063	3.89482	1.25125	0.263313	0.999516	Brd4	ENSRNOG00000006770
1550	ENSRNOT00000008964	0.065505	6.53691	0.0705772	0.790498	0.999516	Snf8	ENSRNOG00000006500
1551	ENSRNOT00000008966	0.0709865	5.53453	0.110029	0.740111	0.999516	Trap1	ENSRNOG00000005418
1552	ENSRNOT00000008969	0.537684	2.31505	0.971075	0.324412	0.999516	Laptm4b	ENSRNOG00000006766
1553	ENSRNOT00000008971	-0.038307	1.24825	0.00870877	0.925649	0.999516	Itga11	ENSRNOG00000006723
1554	ENSRNOT00000008972	0.213263	3.81054	0.485297	0.486033	0.999516	Calu	ENSRNOG00000006197
1555	ENSRNOT00000008973	-0.109658	4.92662	0.179404	0.671886	0.999516	Pyurf	ENSRNOG00000006858
1556	ENSRNOT00000008976	-0.190946	3.04471	0.316254	0.573867	0.999516	Srgap2	ENSRNOG00000006733
1557	ENSRNOT00000008980	0.157065	6.06727	0.571537	0.449649	0.999516	Dld	ENSRNOG00000006364
1558	ENSRNOT00000008985	-0.100536	4.16964	0.0479526	0.826665	0.999516	Nell2	ENSRNOG00000006235
1559	ENSRNOT00000008988	0.00862633	5.27535	0.00145839	0.969537	0.999516	Atl2	ENSRNOG00000006523
1560	ENSRNOT00000008999	-0.204014	4.83527	0.350256	0.553968	0.999516	Sh3gl2	ENSRNOG00000006761
1561	ENSRNOT00000009008	0.42813	2.69886	1.04772	0.306034	0.999516	Sumf1	ENSRNOG00000006813
1562	ENSRNOT00000009009	0.0947814	3.86299	0.111117	0.738876	0.999516	Dnajc9	ENSRNOG00000006619
1563	ENSRNOT00000009015	-0.131558	4.45732	0.275402	0.599731	0.999516	Nup88	ENSRNOG00000006126
1564	ENSRNOT00000009020	-0.180758	2.88412	0.30038	0.583645	0.999516	Dtd2	ENSRNOG00000006727
1565	ENSRNOT00000009041	0.143311	1.93228	0.134951	0.713353	0.999516	Chrna4	ENSRNOG00000011202
1566	ENSRNOT00000009044	0.111045	3.23268	0.112714	0.737076	0.999516	RGD1564804	ENSRNOG00000027455
1567	ENSRNOT00000009046	-0.105588	7.0349	0.202623	0.652612	0.999516	Rpl34	ENSRNOG00000016387
1568	ENSRNOT00000009047	-0.402135	2.96052	1.43154	0.231513	0.999516	Wwp1	ENSRNOG00000006328
1569	ENSRNOT00000009054	-0.057715	3.13206	0.0311042	0.860008	0.999516	Zfp212	ENSRNOG00000006711
1570	ENSRNOT00000009067	0.864862	0.533246	4.36609	0.036661	0.999516	Cd320	ENSRNOG00000006901
1571	ENSRNOT00000009082	-0.407812	1.3635	0.987458	0.320365	0.999516	Rpain	ENSRNOG00000006913
[truncated: 15,728 more rows]

## Sheet: Striatum Scr1 vs ASO3
	Transcript stable ID	logFC	logCPM	LR	PValue	FDR	Gene name	Gene stable ID
6492	ENSRNOT00000034401	-1.49554	9.80887	100.938	9.49002e-24	1.85606e-19	Gfap	ENSRNOG00000002919
2284	ENSRNOT00000011945	-2.5522	4.96737	91.1671	1.32034e-21	1.29116e-17	Gpnmb	ENSRNOG00000008816
3804	ENSRNOT00000019346	-2.32168	4.69994	72.1002	2.04548e-17	1.33351e-13	A2m	ENSRNOG00000028896
13195	ENSRNOT00000096843	3.0225	3.03508	54.9066	1.26393e-13	6.18001e-10	Rasgef1a	ENSRNOG00000031671
9081	ENSRNOT00000067875	-2.54839	2.82932	49.9481	1.57864e-12	6.17499e-09	Spp1	ENSRNOG00000043451
4878	ENSRNOT00000024430	-1.25339	6.79137	44.3839	2.69896e-11	8.7977e-08	Vim	ENSRNOG00000018087
3088	ENSRNOT00000015958	-1.88134	3.59316	43.9518	3.36555e-11	9.40335e-08	S100a4	ENSRNOG00000011821
18352	ENSRNOT00000115891	1.57572	5.52027	42.1178	8.59377e-11	2.10096e-07	NA	ENSRNOG00000069950
18897	ENSRNOT00000117948	-2.04916	2.74054	40.9407	1.56918e-10	3.40999e-07	NA	ENSRNOG00000070065
10647	ENSRNOT00000081574	-1.5385	5.2351	39.8135	2.79412e-10	5.46474e-07	Septin7	ENSRNOG00000006545
6218	ENSRNOT00000031230	1.66396	7.15664	38.3197	6.00544e-10	1.03536e-06	Agap2	ENSRNOG00000025584
18931	ENSRNOT00000118067	-2.08515	3.57097	38.21	6.35254e-10	1.03536e-06	Tm7sf3	ENSRNOG00000001817
19076	ENSRNOT00000118592	2.18039	3.09696	37.9389	7.29945e-10	1.09817e-06	NA	ENSRNOG00000068182
10748	ENSRNOT00000082304	-2.46618	3.89781	37.2528	1.03766e-09	1.44961e-06	Lgals3	ENSRNOG00000010645
13193	ENSRNOT00000096838	1.94843	4.23668	34.9799	3.33133e-09	4.34362e-06	NA	ENSRNOG00000068626
3698	ENSRNOT00000018846	-1.23889	4.56228	32.1974	1.39276e-08	1.70248e-05	Aebp1	ENSRNOG00000013720
5756	ENSRNOT00000028003	1.91278	3.14225	31.9691	1.56646e-08	1.80217e-05	Ppp1r32	ENSRNOG00000020620
18679	ENSRNOT00000117096	2.19593	4.15343	31.6648	1.83212e-08	1.9907e-05	Crocc2	ENSRNOG00000063752
9007	ENSRNOT00000067391	-1.03206	5.74316	30.3935	3.52714e-08	3.63073e-05	Mt2A	ENSRNOG00000043098
1501	ENSRNOT00000007747	-1.03362	5.56664	30.2327	3.83186e-08	3.74717e-05	Lyz2	ENSRNOG00000005825
15145	ENSRNOT00000104117	2.11732	1.07147	29.8866	4.58062e-08	4.26609e-05	Dipk1b	ENSRNOG00000004532
3426	ENSRNOT00000017454	-2.25599	1.85874	29.3284	6.1095e-08	5.43134e-05	Aspg	ENSRNOG00000012843
8370	ENSRNOT00000059776	2.12934	3.00839	29.1262	6.78142e-08	5.76657e-05	Ccdc153	ENSRNOG00000039086
1605	ENSRNOT00000008461	2.64502	1.79279	28.4782	9.47575e-08	7.72195e-05	Kcnk16	ENSRNOG00000006422
16457	ENSRNOT00000108902	-1.29033	6.24149	28.3259	1.02514e-07	8.01985e-05	Chi3l1	ENSRNOG00000053272
6247	ENSRNOT00000031555	-1.50776	3.91469	28.2291	1.07772e-07	8.10693e-05	Hspb1	ENSRNOG00000023546
503	ENSRNOT00000002486	1.4855	3.9066	27.1531	1.87967e-07	0.000132178	Tm7sf3	ENSRNOG00000001817
2591	ENSRNOT00000013496	2.40068	1.11009	27.1401	1.89232e-07	0.000132178	Ldlr	ENSRNOG00000009946
986	ENSRNOT00000005102	1.63612	4.11442	26.8564	2.19143e-07	0.000134581	Nlgn3	ENSRNOG00000003812
9076	ENSRNOT00000067841	-1.5209	3.23412	26.7725	2.28869e-07	0.000134581	Acap3	ENSRNOG00000022307
10430	ENSRNOT00000079999	1.19514	5.20681	26.7712	2.29023e-07	0.000134581	Ptprs	ENSRNOG00000047247
16216	ENSRNOT00000108028	-1.34841	3.8566	26.7727	2.28852e-07	0.000134581	Pla2g7	ENSRNOG00000025691
16701	ENSRNOT00000109805	2.2318	2.98135	26.73	2.33958e-07	0.000134581	Dnah3	ENSRNOG00000050426
18307	ENSRNOT00000115742	-0.895152	7.70522	27.0343	1.9988e-07	0.000134581	Bcas1	ENSRNOG00000012906
15240	ENSRNOT00000104512	-0.904424	11.4203	25.1059	5.42659e-07	0.000303238	Mobp	ENSRNOG00000018700
10762	ENSRNOT00000082388	1.34309	5.03323	24.8473	6.20567e-07	0.00033714	Pc	ENSRNOG00000019372
19241	ENSRNOT00000119175	1.93371	2.01036	24.7945	6.37808e-07	0.000337142	Scyl2	ENSRNOG00000024955
2321	ENSRNOT00000012129	-1.9731	3.55785	24.4689	7.55182e-07	0.00038868	Nsmf	ENSRNOG00000008810
7679	ENSRNOT00000048768	1.97603	2.66811	24.0408	9.43149e-07	0.000461153	Cfap92	ENSRNOG00000031408
11338	ENSRNOT00000086242	1.3298	4.76627	24.0417	9.4274e-07	0.000461153	Lrp4	ENSRNOG00000015285
18177	ENSRNOT00000115275	1.47667	3.79384	23.6764	1.13974e-06	0.000543683	Speg	ENSRNOG00000019850
10468	ENSRNOT00000080246	-2.2667	5.95554	23.495	1.25237e-06	0.000583187	Igf2	ENSRNOG00000020369
1742	ENSRNOT00000009196	2.02906	1.39752	23.218	1.4464e-06	0.000630299	Cfap57	ENSRNOG00000007037
5066	ENSRNOT00000025279	-0.932789	7.98667	23.2999	1.38604e-06	0.000630299	Mobp	ENSRNOG00000018700
9748	ENSRNOT00000075476	-2.23635	1.38639	23.1818	1.47386e-06	0.000630299	Islr	ENSRNOG00000048924
15620	ENSRNOT00000105809	-1.81965	2.09722	23.1706	1.48245e-06	0.000630299	Gpnmb	ENSRNOG00000008816
6427	ENSRNOT00000033685	2.11174	1.6441	22.9893	1.62905e-06	0.000677894	T2	ENSRNOG00000024172
14341	ENSRNOT00000101069	-0.943729	7.18014	22.9438	1.66809e-06	0.000679676	Bcas1	ENSRNOG00000012906
856	ENSRNOT00000004382	-2.63551	2.89087	22.5385	2.05977e-06	0.000822142	Fmod	ENSRNOG00000003183
10168	ENSRNOT00000078354	-1.76685	2.14173	22.3165	2.31217e-06	0.000904427	Oxr1	ENSRNOG00000056487
8169	ENSRNOT00000056923	-1.05474	5.18022	22.2324	2.41558e-06	0.000926352	Gpatch4	ENSRNOG00000018969
4574	ENSRNOT00000023068	-3.54769	4.76038	21.6938	3.19828e-06	0.00118023	Igfbp2	ENSRNOG00000016957
12329	ENSRNOT00000093266	-1.22921	3.58384	21.7254	3.14597e-06	0.00118023	Gfap	ENSRNOG00000002919
17708	ENSRNOT00000113486	1.24846	5.93294	21.3913	3.74467e-06	0.0013316	Clstn1	ENSRNOG00000016398
18781	ENSRNOT00000117481	-1.08	6.96309	21.4001	3.72758e-06	0.0013316	Ptpn11	ENSRNOG00000030124
13604	ENSRNOT00000098374	1.70213	4.66344	21.2413	4.04942e-06	0.00141426	Heatr5b	ENSRNOG00000025926
4364	ENSRNOT00000022113	-5.23527	8.47942	20.9844	4.63038e-06	0.00158879	Ttr	ENSRNOG00000016275
18961	ENSRNOT00000118156	2.42175	2.60172	20.929	4.76618e-06	0.00160719	Klc1	ENSRNOG00000011572
956	ENSRNOT00000004992	1.72068	1.56086	20.7546	5.22059e-06	0.00173058	Ush2a	ENSRNOG00000003738
9641	ENSRNOT00000074586	-1.17757	3.44643	20.5299	5.87085e-06	0.00184256	Cebpd	ENSRNOG00000050869
10380	ENSRNOT00000079678	-0.836663	4.8886	20.509	5.93523e-06	0.00184256	Csad	ENSRNOG00000011573
11481	ENSRNOT00000087167	0.812146	6.37232	20.5607	5.77689e-06	0.00184256	Cttnbp2	ENSRNOG00000061845
17664	ENSRNOT00000113305	1.05041	4.2283	20.5461	5.82122e-06	0.00184256	Dmxl1	ENSRNOG00000024671
2880	ENSRNOT00000014939	-1.28786	4.64104	20.2854	6.67072e-06	0.00203853	Trak2	ENSRNOG00000010881
3600	ENSRNOT00000018340	1.24597	5.15172	20.0513	7.53918e-06	0.00225453	Add1	ENSRNOG00000013039
8281	ENSRNOT00000058295	-0.713709	11.9294	20.0143	7.68645e-06	0.00225453	Mbp	ENSRNOG00000016516
11043	ENSRNOT00000084276	1.77641	3.68178	20.0052	7.72338e-06	0.00225453	Cfap65	ENSRNOG00000056996
1559	ENSRNOT00000008138	0.913908	4.66627	19.946	7.96598e-06	0.00228574	Slc38a1	ENSRNOG00000005291
2310	ENSRNOT00000012080	-1.56284	2.61523	19.9226	8.06403e-06	0.00228574	Draxin	ENSRNOG00000008911
1101	ENSRNOT00000005645	-1.99015	1.67094	19.8256	8.48385e-06	0.00237039	Ifitm1	ENSRNOG00000004273
1610	ENSRNOT00000008492	1.95041	2.33624	19.7068	9.0279e-06	0.00245233	Aurkb	ENSRNOG00000005659
11549	ENSRNOT00000087662	-1.00636	6.74218	19.7096	9.01489e-06	0.00245233	Gpd1	ENSRNOG00000056457
9612	ENSRNOT00000074346	1.95497	1.9464	19.6252	9.42191e-06	0.0025243	Lrrc74b	ENSRNOG00000001872
8196	ENSRNOT00000057187	1.68471	2.54703	19.5672	9.71229e-06	0.00256693	Ak9	ENSRNOG00000037688
10569	ENSRNOT00000080935	0.835623	5.04961	19.4685	1.02273e-05	0.00266701	Socs7	ENSRNOG00000059008
16497	ENSRNOT00000109029	1.29909	3.8755	19.1864	1.18553e-05	0.00305086	Hspa13	ENSRNOG00000060979
2648	ENSRNOT00000013745	-1.60056	1.89054	18.936	1.35174e-05	0.00343342	Timp1	ENSRNOG00000010208
14743	ENSRNOT00000102674	-0.932607	4.5087	18.8164	1.43927e-05	0.00360889	Fxyd1	ENSRNOG00000021079
14992	ENSRNOT00000103603	1.47395	3.05867	18.7135	1.51906e-05	0.00376074	Pum1	ENSRNOG00000011709
3186	ENSRNOT00000016341	-1.08884	4.0434	18.5934	1.61782e-05	0.00395517	Golga2	ENSRNOG00000011884
10508	ENSRNOT00000080524	1.39991	2.40628	18.4256	1.76673e-05	0.00426589	Stk11ip	ENSRNOG00000020107
11649	ENSRNOT00000088391	1.00962	6.36942	18.2484	1.93892e-05	0.00462456	Nedd4	ENSRNOG00000058898
9533	ENSRNOT00000073687	1.14277	5.33036	18.1921	1.99706e-05	0.00470584	Casd1	ENSRNOG00000047453
9313	ENSRNOT00000071728	-1.54763	3.10921	18.123	2.07081e-05	0.00482153	Fcgr2a-ps1	ENSRNOG00000046663
260	ENSRNOT00000001409	1.13712	4.19623	18.0549	2.14622e-05	0.00493833	Timm44	ENSRNOG00000001058
13189	ENSRNOT00000096831	-1.43154	3.21872	17.8559	2.38279e-05	0.0054189	Chka	ENSRNOG00000016791
13775	ENSRNOT00000099027	1.95515	0.986085	17.7217	2.55687e-05	0.00571114	Spata18	ENSRNOG00000002120
15342	ENSRNOT00000104823	1.65032	0.862702	17.7122	2.56969e-05	0.00571114	Lrrk2	ENSRNOG00000004048
2186	ENSRNOT00000011450	1.81568	1.78448	17.6872	2.60368e-05	0.00572166	Cfap45	ENSRNOG00000008492
5080	ENSRNOT00000025325	1.2728	4.82899	17.6433	2.66447e-05	0.0057902	Wdr7	ENSRNOG00000018387
11079	ENSRNOT00000084521	0.865392	4.65077	17.5922	2.73713e-05	0.00588272	Ccdc39	ENSRNOG00000011440
5243	ENSRNOT00000025983	-1.69169	1.91784	17.5022	2.86975e-05	0.0061007	Ggta1	ENSRNOG00000019179
7273	ENSRNOT00000043535	0.716509	5.69082	17.2489	3.27882e-05	0.00689539	Ankrd34a	ENSRNOG00000033741
8845	ENSRNOT00000066024	1.50193	1.26861	17.0032	3.73172e-05	0.00768262	Lrrc7	ENSRNOG00000011980
10872	ENSRNOT00000083156	0.95213	7.34768	17.0123	3.71377e-05	0.00768262	Tuba1a	ENSRNOG00000053468
1183	ENSRNOT00000006005	-1.26034	3.65171	16.886	3.96929e-05	0.00800323	Dcaf5	ENSRNOG00000004556
16075	ENSRNOT00000107421	-1.87892	1.50533	16.9028	3.93425e-05	0.00800323	Phactr1	ENSRNOG00000014264
7064	ENSRNOT00000040736	-1.13211	6.22663	16.8557	4.03316e-05	0.00804904	Sgk1	ENSRNOG00000011815
6183	ENSRNOT00000030919	-0.557412	11.2389	16.7511	4.26176e-05	0.00841934	Fth1	ENSRNOG00000022619
14225	ENSRNOT00000100640	-1.79797	2.22069	16.6915	4.39782e-05	0.00860125	Rtel1	ENSRNOG00000027513
14353	ENSRNOT00000101129	1.20226	4.61683	16.5189	4.81673e-05	0.0093273	Dnm1l	ENSRNOG00000001813
8929	ENSRNOT00000066723	0.796294	4.89331	16.1445	5.86876e-05	0.0112373	Setd5	ENSRNOG00000007472
14898	ENSRNOT00000103260	-1.48538	1.48743	16.1104	5.97545e-05	0.0112373	Lgals1	ENSRNOG00000009884
15079	ENSRNOT00000103864	-1.10179	4.58276	16.117	5.95486e-05	0.0112373	Fcer1g	ENSRNOG00000024159
9804	ENSRNOT00000075928	-1.49053	3.82446	16.0387	6.20611e-05	0.0114997	Cfb	ENSRNOG00000051235
19430	ENSRNOT00000119964	-1.13258	3.86453	16.0306	6.23256e-05	0.0114997	Cp	ENSRNOG00000011913
17134	ENSRNOT00000111282	-0.78207	7.31029	15.9832	6.39071e-05	0.0116813	Pkp4	ENSRNOG00000005504
10432	ENSRNOT00000080012	1.30632	3.86795	15.8918	6.70679e-05	0.0121455	Scamp5	ENSRNOG00000054008
8020	ENSRNOT00000055194	-0.637871	7.07576	15.7939	7.06291e-05	0.0126731	Dusp3	ENSRNOG00000036798
4362	ENSRNOT00000022095	-1.00585	8.32547	15.7517	7.2224e-05	0.0128414	Clu	ENSRNOG00000016460
5589	ENSRNOT00000027340	0.948631	4.07386	15.7152	7.36311e-05	0.0129737	Pcdha5	ENSRNOG00000020119
3365	ENSRNOT00000017232	-1.48429	1.95565	15.5979	7.83397e-05	0.0136801	Fgl2	ENSRNOG00000012881
5085	ENSRNOT00000025343	-0.753278	8.66153	15.4961	8.26754e-05	0.0140606	Mobp	ENSRNOG00000018700
6640	ENSRNOT00000036092	1.37354	2.04855	15.4974	8.26181e-05	0.0140606	Zdhhc2	ENSRNOG00000022686
17375	ENSRNOT00000112129	-0.922036	5.93936	15.5232	8.14996e-05	0.0140606	Gsn	ENSRNOG00000018991
4394	ENSRNOT00000022246	1.22442	3.46302	15.353	8.91812e-05	0.0150363	Gabrd	ENSRNOG00000016385
18908	ENSRNOT00000117979	-0.792892	6.84946	15.3335	9.01059e-05	0.0150623	Pkp4	ENSRNOG00000005504
3118	ENSRNOT00000016076	-0.664902	6.92415	15.2364	9.48597e-05	0.0157226	Npc2	ENSRNOG00000012062
3127	ENSRNOT00000016121	-1.31891	3.47093	15.2195	9.57082e-05	0.0157299	Sgk1	ENSRNOG00000011815
19132	ENSRNOT00000118798	-2.42665	2.68655	15.139	9.98787e-05	0.0162786	Pgm1	ENSRNOG00000009889
9048	ENSRNOT00000067663	-0.675086	5.97442	15.1032	0.000101791	0.0163182	Col16a1	ENSRNOG00000031475
19000	ENSRNOT00000118307	-1.47099	1.6289	15.1174	0.000101027	0.0163182	Igf1	ENSRNOG00000004517
11929	ENSRNOT00000090273	0.890425	5.17219	15.0315	0.000105729	0.0168118	Ank3	ENSRNOG00000053288
16267	ENSRNOT00000108231	1.7357	2.2136	14.998	0.000107622	0.0169748	Sap30bp	ENSRNOG00000005482
10429	ENSRNOT00000079993	0.666139	6.61825	14.963	0.000109641	0.0171548	Ahcyl1	ENSRNOG00000018569
16657	ENSRNOT00000109623	0.797822	4.8159	14.8691	0.000115237	0.0178873	Rarb	ENSRNOG00000024061
16837	ENSRNOT00000110286	-1.0042	5.02597	14.822	0.000118152	0.0181954	Socs7	ENSRNOG00000059008
15672	ENSRNOT00000106009	-0.764686	4.42107	14.7571	0.000122288	0.0186852	Polr2c	ENSRNOG00000015720
13504	ENSRNOT00000097996	-1.94104	1.66198	14.6768	0.000127606	0.0193466	Ddx27	ENSRNOG00000008081
13127	ENSRNOT00000096628	1.50546	2.11507	14.5538	0.000136215	0.0204931	Tymp	ENSRNOG00000066458
12984	ENSRNOT00000096060	-1.34154	2.39738	14.5299	0.000137952	0.0205959	Anxa1	ENSRNOG00000017469
17982	ENSRNOT00000114504	-1.48159	1.37059	14.3539	0.000151466	0.0224422	Sec23b	ENSRNOG00000008411
13628	ENSRNOT00000098466	0.713239	5.07896	14.2697	0.000158392	0.023292	Kif21b	ENSRNOG00000008471
183	ENSRNOT00000001079	-0.723705	5.39682	14.2446	0.000160519	0.0234286	Fabp7	ENSRNOG00000000814
7427	ENSRNOT00000045356	-1.43939	0.927647	14.1271	0.000170866	0.0242871	Zbtb16	ENSRNOG00000029980
9756	ENSRNOT00000075531	1.51165	3.76685	14.16	0.000167906	0.0242871	Mms19	ENSRNOG00000046769
10555	ENSRNOT00000080846	-1.31736	1.5756	14.1173	0.000171761	0.0242871	Bicc1	ENSRNOG00000000614
16058	ENSRNOT00000107378	-0.693104	6.92902	14.108	0.00017261	0.0242871	Ctsd	ENSRNOG00000020206
17222	ENSRNOT00000111613	0.723228	5.1129	14.1349	0.000170159	0.0242871	Madd	ENSRNOG00000012568
5718	ENSRNOT00000027842	1.57036	1.0983	14.0895	0.000174312	0.0243315	Fen1	ENSRNOG00000020531
8296	ENSRNOT00000058453	0.937089	5.20974	14.0777	0.000175414	0.0243315	Cd200	ENSRNOG00000002141
11525	ENSRNOT00000087458	-0.773239	6.69547	14.0575	0.000177309	0.0244212	Trak2	ENSRNOG00000010881
7344	ENSRNOT00000044313	-1.28732	2.55595	14.0224	0.000180649	0.0245357	Slc39a12	ENSRNOG00000025639
14394	ENSRNOT00000101312	1.45672	2.02425	14.0274	0.000180162	0.0245357	Dnah5	ENSRNOG00000048363
7630	ENSRNOT00000048001	1.5604	1.15774	13.9979	0.000183016	0.0246233	Frmpd2	ENSRNOG00000029131
15962	ENSRNOT00000107007	-1.16342	2.61563	13.9897	0.000183812	0.0246233	Cd44	ENSRNOG00000006094
3971	ENSRNOT00000020141	1.46705	1.46642	13.9201	0.000190752	0.0250388	Dnai3	ENSRNOG00000014893
9564	ENSRNOT00000073971	-1.59079	3.9108	13.9356	0.000189178	0.0250388	Arhgef10	ENSRNOG00000012561
18347	ENSRNOT00000115872	-0.783849	6.72851	13.92	0.000190755	0.0250388	Bcas1	ENSRNOG00000012906
4900	ENSRNOT00000024529	0.803233	4.70225	13.9052	0.000192264	0.0250687	Rbm5	ENSRNOG00000018153
6222	ENSRNOT00000031261	0.775449	5.4833	13.8852	0.000194325	0.0251696	Fam117b	ENSRNOG00000022066
5040	ENSRNOT00000025162	1.45891	1.15626	13.8568	0.000197278	0.0253839	Unc13a	ENSRNOG00000018452
12024	ENSRNOT00000090872	-1.19415	2.78972	13.8116	0.00020208	0.0258318	Plaat3	ENSRNOG00000021206
1433	ENSRNOT00000007339	1.43915	0.45264	13.7387	0.000210076	0.0266797	Lrrc9	ENSRNOG00000005409
17525	ENSRNOT00000112705	-1.00567	3.36617	13.7213	0.000212035	0.0267547	Edem2	ENSRNOG00000019299
4017	ENSRNOT00000020363	1.65101	1.8712	13.5898	0.000227419	0.0282326	Ccdc78	ENSRNOG00000022331
8946	ENSRNOT00000066834	-1.31285	0.95399	13.5844	0.000228078	0.0282326	Cd37	ENSRNOG00000020699
12401	ENSRNOT00000093802	-0.684589	9.146	13.5959	0.00022668	0.0282326	Psap	ENSRNOG00000000571
16537	ENSRNOT00000109173	1.30413	3.338	13.5547	0.000231713	0.0285022	Stx1b	ENSRNOG00000019193
5232	ENSRNOT00000025936	1.14771	2.78495	13.5022	0.000238283	0.0291271	Wtap	ENSRNOG00000019091
8758	ENSRNOT00000065293	1.2991	4.18373	13.4718	0.000242177	0.0292765	Htr2c	ENSRNOG00000030877
11383	ENSRNOT00000086549	1.23042	3.21677	13.4349	0.000246989	0.0292765	Ift122	ENSRNOG00000010952
14149	ENSRNOT00000100361	0.732149	5.34115	13.4423	0.000246015	0.0292765	Rimbp2	ENSRNOG00000022893
14270	ENSRNOT00000100800	-1.41168	2.78908	13.4393	0.000246407	0.0292765	Ss18	ENSRNOG00000016800
15980	ENSRNOT00000107098	-0.639919	12.1861	13.4362	0.000246819	0.0292765	Mbp	ENSRNOG00000016516
12365	ENSRNOT00000093561	-1.68116	1.78119	13.4206	0.000248874	0.0293221	Ogn	ENSRNOG00000029792
7937	ENSRNOT00000052275	1.58267	2.72835	13.3882	0.000253209	0.0296543	Dlec1	ENSRNOG00000032085
1695	ENSRNOT00000008985	1.17879	5.81499	13.3766	0.000254789	0.0296617	Nell2	ENSRNOG00000006235
6907	ENSRNOT00000038852	1.40738	0.554685	13.2933	0.000266356	0.0306271	Dnai2	ENSRNOG00000024523
10494	ENSRNOT00000080452	1.84768	1.65798	13.2883	0.000267072	0.0306271	C14h1orf146	ENSRNOG00000047876
13505	ENSRNOT00000098005	1.09907	3.6758	13.2833	0.00026778	0.0306271	Tmem30a	ENSRNOG00000010895
17883	ENSRNOT00000114141	-0.550128	6.23723	13.2678	0.00027	0.0307015	RGD1560398	ENSRNOG00000069648
5272	ENSRNOT00000026120	1.32708	2.31929	13.2275	0.000275878	0.0311886	Edem2	ENSRNOG00000019299
18519	ENSRNOT00000116530	0.881305	5.96521	13.205	0.000279201	0.0313828	Srrm2	ENSRNOG00000058561
11480	ENSRNOT00000087150	1.82894	3.12137	13.1773	0.000283362	0.0316685	Sncg	ENSRNOG00000058006
8475	ENSRNOT00000061157	1.90248	2.42418	13.1074	0.00029413	0.0317204	Sgk1	ENSRNOG00000011815
9712	ENSRNOT00000075188	1.47229	1.37666	13.1407	0.000288952	0.0317204	Armc3	ENSRNOG00000016716
12333	ENSRNOT00000093295	-0.8763	4.84323	13.1073	0.000294141	0.0317204	Cd200	ENSRNOG00000002141
15230	ENSRNOT00000104474	-0.9029	4.72774	13.1371	0.000289499	0.0317204	Ypel3	ENSRNOG00000019721
16283	ENSRNOT00000108296	-1.76723	1.71748	13.1535	0.000286976	0.0317204	Trip10	ENSRNOG00000055524
17018	ENSRNOT00000110900	1.91737	2.57934	13.1043	0.000294618	0.0317204	Arhgap21	ENSRNOG00000008659
17623	ENSRNOT00000113171	0.77376	4.8897	13.1007	0.000295179	0.0317204	Pcdh1	ENSRNOG00000060410
3571	ENSRNOT00000018167	0.896445	4.52781	13.0781	0.000298762	0.0317564	Pex14	ENSRNOG00000013498
8074	ENSRNOT00000055805	1.42348	2.69059	13.0797	0.000298513	0.0317564	Odf3b	ENSRNOG00000037060
2860	ENSRNOT00000014807	-1.33983	1.74787	13.0599	0.00030168	0.0318933	Igfbp6	ENSRNOG00000010977
15297	ENSRNOT00000104683	-1.23629	2.80765	13.0384	0.000305174	0.0320892	Fen1	ENSRNOG00000020531
[truncated: 19,372 more rows]

## Sheet: Ventral Midbrain Scr1 vs ASO3
	Transcript stable ID	logFC	logCPM	LR	PValue	FDR	Gene name	Gene stable ID
[truncated: 20,548 more rows]
