# Supplementary material for: Brain region-resolved pharmacodynamics of a human SNCA 3′UTR-targeting antisense oligonucleotide in BAC-hSNCA rats
Source: Research Square preprint supplement (doi:10.21203/rs.3.rs-8521036/v1), 2026-01-21
Supplement: Supplementary file 2 [file d4c72adcba0ae3da9c3ab93d.xlsx]

## Sheet: Table title
Data S2. Overrepresented Gene Ontology biological processes and corresponding differentially expressed genes identified by ClueGO analysis.

## Sheet: Olfactory bulb
ID	Term	Term PValue	Term PValue Corrected with Bonferroni step down	Group PValue	Group PValue Corrected with Bonferroni step down	GOLevels	GOGroups	% Associated Genes	Nr. Genes	Cluster	Genes Cluster #1	Genes Cluster #2	%Genes Cluster #1	%Genes Cluster #2	%Genes Cluster #1.adjusted.to.input.list.size	%Genes Cluster #2.adjusted.to.input.list.size	Associated Genes Found
GO:0006091	generation of precursor metabolites and energy	3.27443e-06	0.000684356	3.27443e-06	3.92932e-05	[3]	Group00	6.23656	29	Specific for Cluster #1	[Aco2, Aldoc, Atp5mg, COX2, Cfh, Cox4i1, Eno3, Gapdh, Gnas, Gnpda1, Gpd1, Mt3, Ncor1, Ndufv1, Nipsnap2, Oxa1l, Pfkp, Sdhd, Slc25a23, Tpi1]	[Cfh, Hk1, Il6st, LOC108351137, Ncor1, Ndufa10, Ndufs2, Ppp1ca, Slc1a3, Sorbs1, Tcf7l2]	64.5161	35.4839	65.3385	34.6615	[Aco2, Aldoc, Atp5mg, COX2, Cfh, Cox4i1, Eno3, Gapdh, Gnas, Gnpda1, Gpd1, Hk1, Il6st, LOC108351137, Mt3, Ncor1, Ndufa10, Ndufs2, Ndufv1, Nipsnap2, Oxa1l, Pfkp, Ppp1ca, Sdhd, Slc1a3, Slc25a23, Sorbs1, Tcf7l2, Tpi1]
GO:0006106	fumarate metabolic process	5.5012e-05	0.0107273	5.5012e-05	0.00027506	[7]	Group01	75	3	Specific for Cluster #2	[Cfh]	[Cfh, Got1, Got2]	25	75	25.6833	74.3167	[Cfh, Got1, Got2]
GO:0072659	protein localization to plasma membrane	0.000250738	0.0461358	0.000250738	0.000501476	[5, 6]	Group02	6.03175	19	Specific for Cluster #2	[Actb, Camk2g, Cib1, Fcer1g, Hectd1, Myo5b, Slmap, Stx4]	[Acsl3, Actb, Cd81, Cdh2, Cltc, Dpp6, Flna, Hectd1, Myo5b, Rock1, Scarb2, Slmap, Sorbs1, Stx3, Tspan5]	34.7826	65.2174	35.6063	64.3937	[Acsl3, Actb, Camk2g, Cd81, Cdh2, Cib1, Cltc, Dpp6, Fcer1g, Flna, Hectd1, Myo5b, Rock1, Scarb2, Slmap, Sorbs1, Stx3, Stx4, Tspan5]
GO:1902430	negative regulation of amyloid-beta formation	5.30889e-05	0.0104054	5.30889e-05	0.000318534	[4, 5, 6, 7, 8, 9]	Group03	27.7778	5	Specific for Cluster #2	[Apoe]	[Clu, Rock1, Rtn3, Rtn4]	20	80	20.5841	79.4159	[Apoe, Clu, Rock1, Rtn3, Rtn4]
GO:2000010	positive regulation of protein localization to cell surface	1.50646e-06	0.000319369	1.50646e-06	2.10904e-05	[4, 5, 6, 7]	Group04	28	7	None Specific Cluster	[Agap2, Fcer1g, Stx4, Tm9sf4]	[Hnrnpk, Hsp90ab1, Stx3]	57.1429	42.8571	58.0249	41.9751	[Agap2, Fcer1g, Hnrnpk, Hsp90ab1, Stx3, Stx4, Tm9sf4]
GO:0009449	gamma-aminobutyric acid biosynthetic process	0.000265269	0.0485442	0.000265269	0.000265269	[5, 6, 7, 8]	Group05	50	3	Specific for Cluster #2	[]	[Gad1, Slc1a3, Slc38a1]	0	100	0	100	[Gad1, Slc1a3, Slc38a1]
GO:0032984	protein-containing complex disassembly	0.000196542	0.0367533	0.000196542	0.000786166	[5]	Group06	6.56371	17	Specific for Cluster #2	[Add1, Carmil1, Cfl1, Cib1, Gabarap]	[Arid1a, Cltc, Hspa8, Lamp2, Napa, Nav3, Oga, Sh3gl1, Shroom2, Swap70, Vipas39, Vps16]	29.4118	70.5882	30.1671	69.8329	[Add1, Arid1a, Carmil1, Cfl1, Cib1, Cltc, Gabarap, Hspa8, Lamp2, Napa, Nav3, Oga, Sh3gl1, Shroom2, Swap70, Vipas39, Vps16]
GO:0060560	developmental growth involved in morphogenesis	0.000225867	0.0417853	0.000225867	0.0006776	[3, 4]	Group07	6.27178	18	Specific for Cluster #2	[Apoe, Bmp4, Cfl1, Mapt, Mt3, Myo5b, Trim28]	[Dcx, Draxin, Ednrb, Eif2ak4, Eif4g2, Fgfr2, Hnrnpk, Myo5b, Postn, Rtn4, Slc12a2, Tnc]	36.8421	63.1579	37.6864	62.3136	[Apoe, Bmp4, Cfl1, Dcx, Draxin, Ednrb, Eif2ak4, Eif4g2, Fgfr2, Hnrnpk, Mapt, Mt3, Myo5b, Postn, Rtn4, Slc12a2, Tnc, Trim28]
GO:0072594	establishment of protein localization to organelle	3.30372e-06	0.000687174	3.30372e-06	3.63409e-05	[4, 6]	Group08	6.36364	28	Specific for Cluster #2	[Bmp4, Cfl1, Mapt, Oxa1l, Sec61a2, Srp72, Timm13, Trim28, Vps28]	[Cct3, Cct4, Cct8, Clu, Ddx5, Flna, Hacl1, Hgs, Hk1, Hsp90ab1, Hspa4, Hspa8, Lamp2, Mapk1, Pttg1ip, Scarb2, Tcp1, Ubl4a, Ywhaz]	32.1429	67.8571	32.9356	67.0644	[Bmp4, Cct3, Cct4, Cct8, Cfl1, Clu, Ddx5, Flna, Hacl1, Hgs, Hk1, Hsp90ab1, Hspa4, Hspa8, Lamp2, Mapk1, Mapt, Oxa1l, Pttg1ip, Scarb2, Sec61a2, Srp72, Tcp1, Timm13, Trim28, Ubl4a, Vps28, Ywhaz]
GO:0050808	synapse organization	1.06444e-06	0.000226726	1.06444e-06	1.59666e-05	[5]	Group09	5.76324	37	Specific for Cluster #2	[Actb, Actn4, Adgrl3, Apoe, Camk1, Camkv, Cfl1, Dmpk, Gpm6a, Mapt, Mark2, Myo5b, Psd, Sorbs2]	[Actb, Actg1, Asic2, Cdh2, Dhx36, Dnm1l, Drp2, Fgfr2, Flna, Glrb, Gpm6a, Gria1, Hnrnpk, Hnrnpm, Hspa8, Myo5b, Nptn, Nrxn2, Rock1, Sdc2, Setd5, Sncg, Sorbs1, Sybu, Tnc, Ywhaz]	35	65	35.826	64.174	[Actb, Actg1, Actn4, Adgrl3, Apoe, Asic2, Camk1, Camkv, Cdh2, Cfl1, Dhx36, Dmpk, Dnm1l, Drp2, Fgfr2, Flna, Glrb, Gpm6a, Gria1, Hnrnpk, Hnrnpm, Hspa8, Mapt, Mark2, Myo5b, Nptn, Nrxn2, Psd, Rock1, Sdc2, Setd5, Sncg, Sorbs1, Sorbs2, Sybu, Tnc, Ywhaz]
GO:0099173	postsynapse organization	0.000103042	0.0196811	1.06444e-06	1.59666e-05	[4, 6]	Group09	6.46258	19	None Specific Cluster	[Actb, Actn4, Adgrl3, Apoe, Cfl1, Mark2, Myo5b, Psd, Sorbs2]	[Actb, Actg1, Cdh2, Dhx36, Dnm1l, Glrb, Hnrnpk, Hnrnpm, Hspa8, Myo5b, Nrxn2, Sorbs1]	42.8571	57.1429	43.7438	56.2562	[Actb, Actg1, Actn4, Adgrl3, Apoe, Cdh2, Cfl1, Dhx36, Dnm1l, Glrb, Hnrnpk, Hnrnpm, Hspa8, Mark2, Myo5b, Nrxn2, Psd, Sorbs1, Sorbs2]
GO:0031346	positive regulation of cell projection organization	4.20602e-06	0.000870645	4.20602e-06	4.20602e-05	[4, 5, 6]	Group10	6.15711	29	Specific for Cluster #2	[Apoe, Bbs4, Bmp4, Camk1, Carmil1, Cbfa2t2, Cfl1, Dzip1, Gpm6a, Mapt, Mark2, Myo5b]	[Acsl6, Clip1, Cx3cl1, Dcx, Dhx36, Dnm1l, Dpysl3, Eif4g2, Flna, Fnbp1l, Gpm6a, Hnrnpk, Myo5b, Ndrg4, Nptn, Qk, Scarb2, Tubb2b, Wls]	38.7097	61.2903	39.5699	60.4301	[Acsl6, Apoe, Bbs4, Bmp4, Camk1, Carmil1, Cbfa2t2, Cfl1, Clip1, Cx3cl1, Dcx, Dhx36, Dnm1l, Dpysl3, Dzip1, Eif4g2, Flna, Fnbp1l, Gpm6a, Hnrnpk, Mapt, Mark2, Myo5b, Ndrg4, Nptn, Qk, Scarb2, Tubb2b, Wls]
GO:0010976	positive regulation of neuron projection development	5.88103e-06	0.00121149	4.20602e-06	4.20602e-05	[5, 6, 7, 8, 9, 10, 11, 12]	Group10	7.94979	19	Specific for Cluster #2	[Apoe, Bmp4, Camk1, Cbfa2t2, Mapt, Mark2]	[Acsl6, Clip1, Cx3cl1, Dhx36, Dnm1l, Dpysl3, Flna, Hnrnpk, Ndrg4, Nptn, Qk, Scarb2, Tubb2b]	31.5789	68.4211	32.3644	67.6356	[Acsl6, Apoe, Bmp4, Camk1, Cbfa2t2, Clip1, Cx3cl1, Dhx36, Dnm1l, Dpysl3, Flna, Hnrnpk, Mapt, Mark2, Ndrg4, Nptn, Qk, Scarb2, Tubb2b]
GO:0050684	regulation of mRNA processing	1.65067e-06	0.000348291	1.65067e-06	2.14587e-05	[6, 7, 8, 9]	Group11	10.6383	15	None Specific Cluster	[Acin1, Celf4, Hdac7, Khdrbs3, Safb2, Snrnp70]	[Ahcyl1, Ddx5, Dhx36, Hnrnpk, Hspa8, Qk, Rbm39, Srsf3, Wtap]	40	60	40.8698	59.1302	[Acin1, Ahcyl1, Celf4, Ddx5, Dhx36, Hdac7, Hnrnpk, Hspa8, Khdrbs3, Qk, Rbm39, Safb2, Snrnp70, Srsf3, Wtap]
GO:0048024	regulation of mRNA splicing, via spliceosome	0.000115889	0.0220189	1.65067e-06	2.14587e-05	[6, 7, 8, 9, 10, 11, 12]	Group11	9.48276	11	Specific for Cluster #2	[Acin1, Celf4, Khdrbs3, Snrnp70]	[Ddx5, Hnrnpk, Hspa8, Qk, Rbm39, Srsf3, Wtap]	36.3636	63.6364	37.2034	62.7966	[Acin1, Celf4, Ddx5, Hnrnpk, Hspa8, Khdrbs3, Qk, Rbm39, Snrnp70, Srsf3, Wtap]
GO:0061621	canonical glycolysis	1.34367e-05	0.00271422	1.39727e-05	9.78091e-05	[7, 8, 9, 10, 11, 12, 13, 14, 15]	Group12	35.7143	5	Specific for Cluster #1	[Eno3, Gapdh, Pfkp, Tpi1]	[Hk1]	80	20	80.5716	19.4284	[Eno3, Gapdh, Hk1, Pfkp, Tpi1]
GO:0006734	NADH metabolic process	1.39727e-05	0.00280852	1.39727e-05	9.78091e-05	[7, 8, 9, 10, 11]	Group12	20.5882	7	Specific for Cluster #1	[Eno3, Gapdh, Gpd1, Pc, Pfkp, Tpi1]	[Hk1]	85.7143	14.2857	86.1508	13.8492	[Eno3, Gapdh, Gpd1, Hk1, Pc, Pfkp, Tpi1]
GO:0061684	chaperone-mediated autophagy	8.81243e-06	0.00180655	8.81243e-06	7.04995e-05	[4, 5, 6]	Group13	38.4615	5	Specific for Cluster #2	[Ctsa]	[Clu, Hsp90ab1, Hspa8, Lamp2]	20	80	20.5841	79.4159	[Clu, Ctsa, Hsp90ab1, Hspa8, Lamp2]
GO:0061740	protein targeting to lysosome involved in chaperone-mediated autophagy	1.4005e-05	0.00280099	8.81243e-06	7.04995e-05	[5, 6, 7, 8, 9, 10]	Group13	100	3	Specific for Cluster #2	[]	[Clu, Hspa8, Lamp2]	0	100	0	100	[Clu, Hspa8, Lamp2]
GO:0042063	gliogenesis	7.80239e-05	0.0149806	7.74412e-07	1.23906e-05	[5, 6, 7]	Group14	5.77367	25	Specific for Cluster #2	[Apoe, Bmp4, Cd9, Mobp, Ptpn11]	[Apcdd1, Cdh2, Cers6, Clu, Cx3cl1, Dcx, Hapln1, Hexb, Il6st, Mal, Mapk1, Ndufs2, Nfe2l1, Notch2, Ptpra, Qk, Raf1, Rtn4, Sirt2, Tcf7l2]	20	80	20.5841	79.4159	[Apcdd1, Apoe, Bmp4, Cd9, Cdh2, Cers6, Clu, Cx3cl1, Dcx, Hapln1, Hexb, Il6st, Mal, Mapk1, Mobp, Ndufs2, Nfe2l1, Notch2, Ptpn11, Ptpra, Qk, Raf1, Rtn4, Sirt2, Tcf7l2]
GO:0010001	glial cell differentiation	0.000117105	0.0221328	7.74412e-07	1.23906e-05	[4, 6, 7, 8]	Group14	6.21118	20	Specific for Cluster #2	[Apoe, Bmp4, Cd9, Mobp, Ptpn11]	[Cdh2, Cers6, Clu, Hapln1, Il6st, Mal, Mapk1, Nfe2l1, Notch2, Ptpra, Qk, Raf1, Rtn4, Sirt2, Tcf7l2]	25	75	25.6833	74.3167	[Apoe, Bmp4, Cd9, Cdh2, Cers6, Clu, Hapln1, Il6st, Mal, Mapk1, Mobp, Nfe2l1, Notch2, Ptpn11, Ptpra, Qk, Raf1, Rtn4, Sirt2, Tcf7l2]
GO:0042552	myelination	6.2559e-07	0.000134502	7.74412e-07	1.23906e-05	[4, 7, 8]	Group14	9.67742	18	Specific for Cluster #2	[Bcas1, Cd9, Mbp, Mobp, Pikfyve]	[Atrn, Cdh2, Clu, Hexb, Hnrnpk, Mal, Mapk1, Psap, Qk, Raf1, Scn3a, Sirt2, Tcf7l2]	27.7778	72.2222	28.5081	71.4919	[Atrn, Bcas1, Cd9, Cdh2, Clu, Hexb, Hnrnpk, Mal, Mapk1, Mbp, Mobp, Pikfyve, Psap, Qk, Raf1, Scn3a, Sirt2, Tcf7l2]
GO:0048709	oligodendrocyte differentiation	0.000224927	0.0418364	7.74412e-07	1.23906e-05	[5, 6, 7, 8, 9]	Group14	8.21918	12	Specific for Cluster #2	[Apoe, Bmp4, Cd9, Mobp]	[Cers6, Clu, Mal, Ptpra, Qk, Rtn4, Sirt2, Tcf7l2]	33.3333	66.6667	34.1407	65.8593	[Apoe, Bmp4, Cd9, Cers6, Clu, Mal, Mobp, Ptpra, Qk, Rtn4, Sirt2, Tcf7l2]
GO:0099003	vesicle-mediated transport in synapse	8.15585e-07	0.000174535	1.55744e-09	2.64765e-08	[3, 5]	Group15	7.82313	23	Specific for Cluster #2	[Actb, Ap2s1, Atp6v0d1, Atp6v1c1, Atp6v1e1, Myo5b, Prkcg, Stx4]	[Actb, Actg1, Cdh2, Cltc, Ctbp1, Dnm1l, Hspa8, Myo5b, Napa, Ppp3cb, Prkar1b, Rock1, Sh3gl1, Sirt2, Sncg, Stx3, Syt11]	32	68	32.7909	67.2091	[Actb, Actg1, Ap2s1, Atp6v0d1, Atp6v1c1, Atp6v1e1, Cdh2, Cltc, Ctbp1, Dnm1l, Hspa8, Myo5b, Napa, Ppp3cb, Prkar1b, Prkcg, Rock1, Sh3gl1, Sirt2, Sncg, Stx3, Stx4, Syt11]
GO:0006898	receptor-mediated endocytosis	1.07797e-05	0.00218828	1.55744e-09	2.64765e-08	[4, 6]	Group15	7.35294	20	Specific for Cluster #2	[Ap2s1, Apoe, Arrb1, Cd63, Cd9, Fcer1g, Pikfyve, Tbc1d5]	[Calcrl, Cd81, Cltc, Clu, Fnbp1l, Gria1, Hgs, Hnrnpk, Scarb2, Sirt2, Smap1, Syt11, Tbc1d5]	38.0952	61.9048	38.9505	61.0495	[Ap2s1, Apoe, Arrb1, Calcrl, Cd63, Cd81, Cd9, Cltc, Clu, Fcer1g, Fnbp1l, Gria1, Hgs, Hnrnpk, Pikfyve, Scarb2, Sirt2, Smap1, Syt11, Tbc1d5]
GO:0030100	regulation of endocytosis	3.18804e-05	0.00628044	1.55744e-09	2.64765e-08	[4, 5, 6]	Group15	6.43275	22	None Specific Cluster	[Actb, Actn4, Add1, Apoe, Arrb1, Cd63, Fcer1g, Prkcg, Tbc1d5, Vps28]	[Actb, Actg1, Clu, Dcx, Dnm1l, Hnrnpk, Hspa8, Ppp3cb, Rock1, Sh3gl1, Sirt2, Smap1, Syt11, Tbc1d5]	41.6667	58.3333	42.547	57.453	[Actb, Actg1, Actn4, Add1, Apoe, Arrb1, Cd63, Clu, Dcx, Dnm1l, Fcer1g, Hnrnpk, Hspa8, Ppp3cb, Prkcg, Rock1, Sh3gl1, Sirt2, Smap1, Syt11, Tbc1d5, Vps28]
GO:0036465	synaptic vesicle recycling	5.18082e-07	0.000111906	1.55744e-09	2.64765e-08	[4, 5, 7]	Group15	13.5417	13	Specific for Cluster #2	[Actb, Ap2s1, Myo5b]	[Actb, Actg1, Cltc, Ctbp1, Dnm1l, Hspa8, Myo5b, Ppp3cb, Rock1, Sh3gl1, Sncg, Syt11]	20	80	20.5841	79.4159	[Actb, Actg1, Ap2s1, Cltc, Ctbp1, Dnm1l, Hspa8, Myo5b, Ppp3cb, Rock1, Sh3gl1, Sncg, Syt11]
GO:1900242	regulation of synaptic vesicle endocytosis	9.1144e-06	0.00185934	1.55744e-09	2.64765e-08	[5, 6, 7, 8, 9]	Group15	21.875	7	Specific for Cluster #2	[Actb]	[Actb, Actg1, Dnm1l, Ppp3cb, Rock1, Sh3gl1, Syt11]	12.5	87.5	12.9004	87.0996	[Actb, Actg1, Dnm1l, Ppp3cb, Rock1, Sh3gl1, Syt11]
GO:0032880	regulation of protein localization	4.83183e-12	1.05817e-09	4.83183e-12	8.69729e-11	[4, 5]	Group16	6.23742	62	Specific for Cluster #2	[Actb, Agap2, Apoe, Arrb1, Bmp4, Camk1, Camk2g, Cfl1, Cib1, Dzip1, Fcer1g, Gnas, Hectd1, Map4k4, Mapt, Myo5b, Pias4, Ptpn11, Rbp4, Sorbs2, Stx4, Tm9sf4, Trim28, Vps28]	[Acsl3, Actb, Cct3, Cct4, Cct8, Cd81, Cdh2, Cltc, Clu, Dclk2, Dnm1l, Dpp6, Ednrb, Epb41, Flna, Gdi2, Hcfc1, Hectd1, Hnrnpk, Hnrnpm, Hsp90ab1, Mapk1, Myo5b, Nptn, Nucb1, Oga, Ppp3cb, Rnf4, Rptor, Rtn4, Slc12a2, Sorbs1, Stx3, Swap70, Sybu, Syt11, Tcf7l2, Tcp1, Tm7sf3, Wls, Ywhaz]	36.9231	63.0769	37.7681	62.2319	[Acsl3, Actb, Agap2, Apoe, Arrb1, Bmp4, Camk1, Camk2g, Cct3, Cct4, Cct8, Cd81, Cdh2, Cfl1, Cib1, Cltc, Clu, Dclk2, Dnm1l, Dpp6, Dzip1, Ednrb, Epb41, Fcer1g, Flna, Gdi2, Gnas, Hcfc1, Hectd1, Hnrnpk, Hnrnpm, Hsp90ab1, Map4k4, Mapk1, Mapt, Myo5b, Nptn, Nucb1, Oga, Pias4, Ppp3cb, Ptpn11, Rbp4, Rnf4, Rptor, Rtn4, Slc12a2, Sorbs1, Sorbs2, Stx3, Stx4, Swap70, Sybu, Syt11, Tcf7l2, Tcp1, Tm7sf3, Tm9sf4, T…
GO:1903829	positive regulation of protein localization	7.39587e-12	1.6123e-09	4.83183e-12	8.69729e-11	[3, 4, 5, 6]	Group16	7.91897	43	Specific for Cluster #2	[Agap2, Arrb1, Bmp4, Camk1, Cfl1, Cib1, Dzip1, Fcer1g, Gnas, Mapt, Myo5b, Rbp4, Stx4, Tm9sf4, Trim28, Vps28]	[Acsl3, Cct3, Cct4, Cct8, Cd81, Clu, Dnm1l, Dpp6, Epb41, Flna, Hcfc1, Hnrnpk, Hnrnpm, Hsp90ab1, Mapk1, Myo5b, Nptn, Oga, Ppp3cb, Rtn4, Sorbs1, Stx3, Sybu, Syt11, Tcf7l2, Tcp1, Tm7sf3, Wls]	36.3636	63.6364	37.2034	62.7966	[Acsl3, Agap2, Arrb1, Bmp4, Camk1, Cct3, Cct4, Cct8, Cd81, Cfl1, Cib1, Clu, Dnm1l, Dpp6, Dzip1, Epb41, Fcer1g, Flna, Gnas, Hcfc1, Hnrnpk, Hnrnpm, Hsp90ab1, Mapk1, Mapt, Myo5b, Nptn, Oga, Ppp3cb, Rbp4, Rtn4, Sorbs1, Stx3, Stx4, Sybu, Syt11, Tcf7l2, Tcp1, Tm7sf3, Tm9sf4, Trim28, Vps28, Wls]
GO:0051222	positive regulation of protein transport	1.8171e-06	0.000381591	4.83183e-12	8.69729e-11	[3, 4, 5, 6, 7, 8]	Group16	7.46753	23	Specific for Cluster #2	[Arrb1, Camk1, Gnas, Rbp4, Stx4, Tm9sf4, Trim28, Vps28]	[Acsl3, Cd81, Clu, Dnm1l, Flna, Hcfc1, Hnrnpm, Hsp90ab1, Mapk1, Oga, Ppp3cb, Sybu, Tcf7l2, Tm7sf3, Wls]	34.7826	65.2174	35.6063	64.3937	[Acsl3, Arrb1, Camk1, Cd81, Clu, Dnm1l, Flna, Gnas, Hcfc1, Hnrnpm, Hsp90ab1, Mapk1, Oga, Ppp3cb, Rbp4, Stx4, Sybu, Tcf7l2, Tm7sf3, Tm9sf4, Trim28, Vps28, Wls]
GO:1904951	positive regulation of establishment of protein localization	9.71142e-08	2.10738e-05	4.83183e-12	8.69729e-11	[4, 5, 6, 7]	Group16	7.58808	28	Specific for Cluster #2	[Arrb1, Camk1, Cib1, Gnas, Rbp4, Stx4, Tm9sf4, Trim28, Vps28]	[Acsl3, Cct3, Cct4, Cct8, Cd81, Clu, Dnm1l, Flna, Hcfc1, Hnrnpm, Hsp90ab1, Mapk1, Oga, Ppp3cb, Sybu, Tcf7l2, Tcp1, Tm7sf3, Wls]	32.1429	67.8571	32.9356	67.0644	[Acsl3, Arrb1, Camk1, Cct3, Cct4, Cct8, Cd81, Cib1, Clu, Dnm1l, Flna, Gnas, Hcfc1, Hnrnpm, Hsp90ab1, Mapk1, Oga, Ppp3cb, Rbp4, Stx4, Sybu, Tcf7l2, Tcp1, Tm7sf3, Tm9sf4, Trim28, Vps28, Wls]
GO:0032024	positive regulation of insulin secretion	0.000181855	0.0341887	4.83183e-12	8.69729e-11	[5, 6, 7, 8, 9, 10, 11]	Group16	9.01639	11	Specific for Cluster #2	[Arrb1, Gnas, Rbp4, Stx4]	[Clu, Hcfc1, Oga, Ppp3cb, Sybu, Tcf7l2, Tm7sf3]	36.3636	63.6364	37.2034	62.7966	[Arrb1, Clu, Gnas, Hcfc1, Oga, Ppp3cb, Rbp4, Stx4, Sybu, Tcf7l2, Tm7sf3]
GO:0031647	regulation of protein stability	2.47891e-05	0.00493304	7.71556e-06	6.944e-05	[3]	Group17	6.73077	21	Specific for Cluster #2	[Ctsa, Gapdh, Mt3, Ncor1, Rpl11]	[Cct3, Cct4, Cct8, Cd81, Clu, Cog3, Flna, Hcfc1, Hsp90ab1, Hspa8, Lamp2, Mapk1, Ncor1, Rtn4, Tcp1, Ubl4a, Usp4]	22.7273	77.2727	23.3678	76.6322	[Cct3, Cct4, Cct8, Cd81, Clu, Cog3, Ctsa, Flna, Gapdh, Hcfc1, Hsp90ab1, Hspa8, Lamp2, Mapk1, Mt3, Ncor1, Rpl11, Rtn4, Tcp1, Ubl4a, Usp4]
GO:0050821	protein stabilization	7.25896e-05	0.0140098	7.71556e-06	6.944e-05	[4]	Group17	7.77202	15	Specific for Cluster #2	[Gapdh, Mt3, Ncor1, Rpl11]	[Cct3, Cct4, Cct8, Clu, Cog3, Flna, Hcfc1, Hsp90ab1, Lamp2, Ncor1, Rtn4, Tcp1]	25	75	25.6833	74.3167	[Cct3, Cct4, Cct8, Clu, Cog3, Flna, Gapdh, Hcfc1, Hsp90ab1, Lamp2, Mt3, Ncor1, Rpl11, Rtn4, Tcp1]
GO:0140662	ATP-dependent protein folding chaperone	1.39727e-05	0.00280852	7.71556e-06	6.944e-05	[4, 7, 8, 9]	Group17	20.5882	7	Specific for Cluster #2	[]	[Cct3, Cct4, Cct8, Hsp90ab1, Hspa4, Hspa8, Tcp1]	0	100	0	100	[Cct3, Cct4, Cct8, Hsp90ab1, Hspa4, Hspa8, Tcp1]
GO:1904851	positive regulation of establishment of protein localization to telomere	6.28374e-05	0.0121904	7.71556e-06	6.944e-05	[5, 6, 7, 8, 9, 10]	Group17	40	4	Specific for Cluster #2	[]	[Cct3, Cct4, Cct8, Tcp1]	0	100	0	100	[Cct3, Cct4, Cct8, Tcp1]
GO:1904358	positive regulation of telomere maintenance via telomere lengthening	2.51215e-05	0.00497405	7.71556e-06	6.944e-05	[6, 7, 8, 9, 10]	Group17	18.9189	7	Specific for Cluster #2	[Mapk15]	[Cct3, Cct4, Cct8, Dhx36, Mapk1, Tcp1]	14.2857	85.7143	14.7337	85.2663	[Cct3, Cct4, Cct8, Dhx36, Mapk1, Mapk15, Tcp1]

## Sheet: Prefrontal Cortex
ID	Term	Term PValue	Term PValue Corrected with Bonferroni step down	Group PValue	Group PValue Corrected with Bonferroni step down	GOLevels	GOGroups	% Associated Genes	Nr. Genes	Cluster	Genes Cluster #1	Genes Cluster #2	%Genes Cluster #1	%Genes Cluster #2	%Genes Cluster #1.adjusted.to.input.list.size	%Genes Cluster #2.adjusted.to.input.list.size	Associated Genes Found
GO:0090717	adaptive immune memory response involving T cells and B cells	0.00191388	0.030622	0.00191388	0.00382775	[4, 5]	Group0	100	1	Specific for Cluster #1	[Ebag9]	[]	100	0	100	0	[Ebag9]
GO:1900022	regulation of D-erythro-sphingosine kinase activity	0.00191388	0.030622	0.00191388	0.00382775	[7, 9, 10]	Group1	100	1	Specific for Cluster #1	[Eef1a1]	[]	100	0	100	0	[Eef1a1]
GO:1902746	regulation of lens fiber cell differentiation	0.000158169	0.00268887	0.000158169	0.000474506	[5, 6, 7, 9, 10, 11]	Group2	20	2	None Specific Cluster	[Zeb2]	[Spry2]	50	50	42.1053	57.8947	[Spry2, Zeb2]
GO:0006185	dGDP biosynthetic process	0.00191388	0.030622	0.00191388	0.00382775	[8, 9, 10, 11, 12]	Group3	100	1	Specific for Cluster #1	[Guk1]	[]	100	0	100	0	[Guk1]
GO:0046711	GDP biosynthetic process	0.00191388	0.030622	0.00191388	0.00382775	[8, 9, 10, 11]	Group3	100	1	Specific for Cluster #1	[Guk1]	[]	100	0	100	0	[Guk1]
GO:1901254	positive regulation of intracellular transport of viral material	0.00191388	0.030622	0.0394546	0.0394546	[4, 5, 6]	Group4	100	1	Specific for Cluster #2	[]	[Fmr1]	0	100	0	100	[Fmr1]
GO:0010955	negative regulation of protein processing	0.0394546	0.0394546	0.0394546	0.0394546	[6, 7, 8, 9, 10]	Group4	4.7619	1	Specific for Cluster #2	[]	[Fmr1]	0	100	0	100	[Fmr1]

## Sheet: Striatum
ID	Term	Term PValue	Term PValue Corrected with Bonferroni step down	Group PValue	Group PValue Corrected with Bonferroni step down	GOLevels	GOGroups	% Associated Genes	Nr. Genes	Cluster	Genes Cluster #1	Genes Cluster #2	%Genes Cluster #1	%Genes Cluster #2	%Genes Cluster #1.adjusted.to.input.list.size	%Genes Cluster #2.adjusted.to.input.list.size	Associated Genes Found
GO:0002028	regulation of sodium ion transport	0.000594747	0.0113002	0.000594747	0.00237899	[6, 7, 8]	Group00	7.46269	5	Specific for Cluster #2	[Fxyd1, Sgk1]	[Ahcyl1, Ank3, Nedd4, Sgk1]	33.3333	66.6667	33.8673	66.1327	[Ahcyl1, Ank3, Fxyd1, Nedd4, Sgk1]
GO:1900407	regulation of cellular response to oxidative stress	0.00342679	0.0342679	0.00342679	0.00685358	[4, 5, 6]	Group01	10	3	Specific for Cluster #1	[Clu, Hspb1, Oxr1]	[]	100	0	100	0	[Clu, Hspb1, Oxr1]
GO:0042104	positive regulation of activated T cell proliferation	0.00252447	0.0302937	0.00252447	0.00757342	[7, 8, 9, 10]	Group02	11.1111	3	Specific for Cluster #1	[Igf1, Igf2, Igfbp2]	[]	100	0	100	0	[Igf1, Igf2, Igfbp2]
GO:0046628	positive regulation of insulin receptor signaling pathway	0.000261954	0.00785861	0.000261954	0.00183368	[4, 5, 6, 7, 8, 9, 10]	Group03	12.9032	4	Specific for Cluster #1	[Ctsd, Igf2, Ptpn11]	[Osbpl8]	75	25	75.4461	24.554	[Ctsd, Igf2, Osbpl8, Ptpn11]
GO:0050775	positive regulation of dendrite morphogenesis	0.0307966	0.0307966	0.0307966	0.0307966	[5, 6, 7, 8, 9, 10, 11, 12, 13, 14]	Group04	4.47761	3	Specific for Cluster #2	[Sgk1]	[Dnm1l, Ptprs, Sgk1]	25	75	25.4514	74.5486	[Dnm1l, Ptprs, Sgk1]
GO:0071709	membrane assembly	2.64249e-05	0.00097772	2.64249e-05	0.000290673	[5]	Group05	10.3448	6	Specific for Cluster #2	[Psap]	[Ank3, Lrp4, Nlgn3, Ptprs, Stx1b]	16.6667	83.3333	17.0017	82.9983	[Ank3, Lrp4, Nlgn3, Psap, Ptprs, Stx1b]
GO:0097105	presynaptic membrane assembly	8.29314e-05	0.0029026	2.64249e-05	0.000290673	[6, 7, 8]	Group05	33.3333	3	Specific for Cluster #2	[]	[Lrp4, Nlgn3, Ptprs]	0	100	0	100	[Lrp4, Nlgn3, Ptprs]
GO:0071621	granulocyte chemotaxis	0.000262217	0.00760428	0.000116971	0.00105274	[4, 5, 6, 7]	Group06	5.69106	7	Specific for Cluster #1	[Anxa1, Fcer1g, Itgb2, Lgals3, Ptk2, Spp1]	[Dnm1l]	85.7143	14.2857	86.0048	13.9952	[Anxa1, Dnm1l, Fcer1g, Itgb2, Lgals3, Ptk2, Spp1]
GO:0099024	plasma membrane invagination	0.00620455	0.0434319	0.000116971	0.00105274	[6]	Group06	5.55556	4	Specific for Cluster #1	[Fcer1g, Gsn, Itgb2]	[Aurkb]	75	25	75.4461	24.554	[Aurkb, Fcer1g, Gsn, Itgb2]
GO:0030593	neutrophil chemotaxis	0.00203351	0.0284692	0.000116971	0.00105274	[5, 6, 7, 8]	Group06	5.68182	5	Specific for Cluster #1	[Fcer1g, Itgb2, Lgals3, Spp1]	[Dnm1l]	80	20	80.3802	19.6198	[Dnm1l, Fcer1g, Itgb2, Lgals3, Spp1]
GO:0099111	microtubule-based transport	6.02609e-07	2.772e-05	6.02609e-07	7.83392e-06	[4]	Group07	5.70175	13	Specific for Cluster #2	[Hspb1, Trak2]	[Ank3, Arhgap21, Ccdc39, Cfap45, Dnah5, Ift122, Klc1, Madd, Pex14, Ttc21a, Tuba1b]	15.3846	84.6154	15.6988	84.3013	[Ank3, Arhgap21, Ccdc39, Cfap45, Dnah5, Hspb1, Ift122, Klc1, Madd, Pex14, Trak2, Ttc21a, Tuba1b]
GO:0010970	transport along microtubule	2.07873e-05	0.000810705	6.02609e-07	7.83392e-06	[4, 5, 6]	Group07	5.37634	10	Specific for Cluster #2	[Hspb1, Trak2]	[Ank3, Arhgap21, Ift122, Klc1, Madd, Pex14, Ttc21a, Tuba1b]	20	80	20.3857	79.6143	[Ank3, Arhgap21, Hspb1, Ift122, Klc1, Madd, Pex14, Trak2, Ttc21a, Tuba1b]
GO:0072384	organelle transport along microtubule	0.00224455	0.0291792	6.02609e-07	7.83392e-06	[4, 5, 6, 7]	Group07	5.55556	5	Specific for Cluster #2	[Trak2]	[Arhgap21, Madd, Pex14, Tuba1b]	20	80	20.3857	79.6143	[Arhgap21, Madd, Pex14, Trak2, Tuba1b]
GO:0098876	vesicle-mediated transport to the plasma membrane	0.00161068	0.0257709	0.000236803	0.00189442	[3, 4, 5]	Group08	4.19162	7	Specific for Cluster #2	[]	[Ank3, Clstn1, Lrrc7, Macf1, Stx1b, Vps26c, Zdhhc2]	0	100	0	100	[Ank3, Clstn1, Lrrc7, Macf1, Stx1b, Vps26c, Zdhhc2]
GO:0035418	protein localization to synapse	0.000123872	0.00421164	0.000236803	0.00189442	[6]	Group08	6.42202	7	Specific for Cluster #2	[Hspb1]	[Clstn1, Klc1, Lrrc7, Nlgn3, Stx1b, Zdhhc2]	14.2857	85.7143	14.5813	85.4187	[Clstn1, Hspb1, Klc1, Lrrc7, Nlgn3, Stx1b, Zdhhc2]
GO:1903539	protein localization to postsynaptic membrane	0.00784916	0.047095	0.000236803	0.00189442	[5, 6, 8]	Group08	5.19481	4	Specific for Cluster #2	[]	[Clstn1, Lrrc7, Stx1b, Zdhhc2]	0	100	0	100	[Clstn1, Lrrc7, Stx1b, Zdhhc2]
GO:0030317	flagellated sperm motility	0.00172403	0.0258605	0.000438895	0.00219447	[3, 4, 5, 6]	Group09	4.14201	7	Specific for Cluster #2	[]	[Armc3, Ccdc39, Cfap45, Cfap65, Dnah5, Drc7, Ttc21a]	0	100	0	100	[Armc3, Ccdc39, Cfap45, Cfap65, Dnah5, Drc7, Ttc21a]
GO:0035082	axoneme assembly	0.000491824	0.0103283	0.000438895	0.00219447	[5, 7, 8]	Group09	6.12245	6	Specific for Cluster #2	[]	[Ccdc39, Cfap65, Dnah5, Dnai2, Drc7, Wdr78]	0	100	0	100	[Ccdc39, Cfap65, Dnah5, Dnai2, Drc7, Wdr78]
GO:0070286	axonemal dynein complex assembly	0.000335321	0.00905366	0.000438895	0.00219447	[6, 8, 9]	Group09	12.1212	4	Specific for Cluster #2	[]	[Ccdc39, Dnah5, Dnai2, Wdr78]	0	100	0	100	[Ccdc39, Dnah5, Dnai2, Wdr78]
GO:0010977	negative regulation of neuron projection development	9.37207e-10	4.40487e-08	2.60748e-09	3.91121e-08	[5, 6, 7, 8, 9, 10, 11, 12]	Group10	8.75	14	Specific for Cluster #1	[Draxin, Gfap, Lgals1, Map4k4, Mbp, Ptk2, Spp1, Trak2, Vim]	[Lrp4, Lrrk2, Nlgn3, Ptprs, Stx1b]	64.2857	35.7143	64.8333	35.1667	[Draxin, Gfap, Lgals1, Lrp4, Lrrk2, Map4k4, Mbp, Nlgn3, Ptk2, Ptprs, Spp1, Stx1b, Trak2, Vim]
GO:0050770	regulation of axonogenesis	2.08452e-06	9.38034e-05	2.60748e-09	3.91121e-08	[4, 5, 6, 7, 8, 9, 10, 11, 12, 13]	Group10	6.17978	11	Specific for Cluster #1	[Draxin, Golga2, Mbp, Ptk2, Spp1, Trak2, Vim, Zeb2]	[Lrp4, Macf1, Ptprs]	72.7273	27.2727	73.1994	26.8006	[Draxin, Golga2, Lrp4, Macf1, Mbp, Ptk2, Ptprs, Spp1, Trak2, Vim, Zeb2]
GO:0050771	negative regulation of axonogenesis	2.1703e-06	9.54931e-05	2.60748e-09	3.91121e-08	[5, 6, 7, 8, 9, 10, 11, 12, 13, 14]	Group10	11.8644	7	Specific for Cluster #1	[Draxin, Mbp, Ptk2, Spp1, Trak2]	[Lrp4, Ptprs]	71.4286	28.5714	71.9145	28.0855	[Draxin, Lrp4, Mbp, Ptk2, Ptprs, Spp1, Trak2]
GO:0051588	regulation of neurotransmitter transport	0.000461695	0.010619	0.000312867	0.0018772	[4, 5]	Group11	5.18518	7	Specific for Cluster #2	[Gfap]	[Dnm1l, Htr2c, Lrrk2, Sncg, Stx1b, Unc13a]	14.2857	85.7143	14.5813	85.4187	[Dnm1l, Gfap, Htr2c, Lrrk2, Sncg, Stx1b, Unc13a]
GO:0036465	synaptic vesicle recycling	0.000440438	0.0105705	0.000312867	0.0018772	[4, 5, 7]	Group11	6.25	6	Specific for Cluster #2	[]	[Dnm1l, Lrrk2, Nlgn3, Scamp5, Sncg, Stx1b]	0	100	0	100	[Dnm1l, Lrrk2, Nlgn3, Scamp5, Sncg, Stx1b]
GO:1903421	regulation of synaptic vesicle recycling	0.000708605	0.0127549	0.000312867	0.0018772	[4, 5, 6, 8]	Group11	10	4	Specific for Cluster #2	[]	[Dnm1l, Lrrk2, Scamp5, Stx1b]	0	100	0	100	[Dnm1l, Lrrk2, Scamp5, Stx1b]
GO:0001956	positive regulation of neurotransmitter secretion	0.00012949	0.00427317	0.000312867	0.0018772	[4, 5, 6, 7, 8, 9, 10, 11]	Group11	15.3846	4	Specific for Cluster #2	[]	[Dnm1l, Htr2c, Stx1b, Unc13a]	0	100	0	100	[Dnm1l, Htr2c, Stx1b, Unc13a]
GO:0010613	positive regulation of cardiac muscle hypertrophy	0.000934498	0.0158865	1.74427e-05	0.000209312	[4, 5, 6, 7, 8]	Group12	9.30233	4	Specific for Cluster #1	[Gsn, Igf1, Ptk2, Trip10]	[]	100	0	100	0	[Gsn, Igf1, Ptk2, Trip10]
GO:0021782	glial cell development	0.000204859	0.0065555	1.74427e-05	0.000209312	[4, 5, 7, 8, 9]	Group12	5.09554	8	Specific for Cluster #1	[Arhgef10, Clu, Gfap, Gsn, Mobp, Vim, Zeb2]	[Ldlr]	87.5	12.5	87.7594	12.2406	[Arhgef10, Clu, Gfap, Gsn, Ldlr, Mobp, Vim, Zeb2]
GO:0048708	astrocyte differentiation	0.00354564	0.0319108	1.74427e-05	0.000209312	[5, 6, 7, 8, 9]	Group12	5	5	Specific for Cluster #1	[Gfap, Ptpn11, Vim, Zeb2]	[Ldlr]	80	20	80.3802	19.6198	[Gfap, Ldlr, Ptpn11, Vim, Zeb2]
GO:0060252	positive regulation of glial cell proliferation	0.000377037	0.00942591	1.74427e-05	0.000209312	[4, 5, 6, 7, 8, 9, 10]	Group12	11.7647	4	Specific for Cluster #1	[Gfap, Igf1, Ptk2, Vim]	[]	100	0	100	0	[Gfap, Igf1, Ptk2, Vim]
GO:0060020	Bergmann glial cell differentiation	0.000212371	0.0065835	1.74427e-05	0.000209312	[6, 7, 8, 9, 10]	Group12	25	3	Specific for Cluster #1	[Gfap, Ptpn11, Vim]	[]	100	0	100	0	[Gfap, Ptpn11, Vim]
GO:0150117	positive regulation of cell-substrate junction organization	0.000581444	0.0116289	2.98505e-05	0.000298505	[4, 5, 6, 7]	Group13	10.5263	4	Specific for Cluster #1	[Col16a1, Dusp3, Map4k4, Ptpn11]	[]	100	0	100	0	[Col16a1, Dusp3, Map4k4, Ptpn11]
GO:0048041	focal adhesion assembly	0.000310988	0.00870767	2.98505e-05	0.000298505	[5, 7]	Group13	6.66667	6	Specific for Cluster #1	[Col16a1, Dusp3, Map4k4, Ptk2, Ptpn11]	[Macf1]	83.3333	16.6667	83.6631	16.3369	[Col16a1, Dusp3, Macf1, Map4k4, Ptk2, Ptpn11]
GO:0050709	negative regulation of protein secretion	0.000371318	0.00965426	2.98505e-05	0.000298505	[4, 5, 6, 7, 8, 9]	Group13	6.45161	6	Specific for Cluster #1	[Anxa1, Cd200, Eny2, Map4k4, Ptpn11]	[Cd200, Madd]	71.4286	28.5714	71.9145	28.0855	[Anxa1, Cd200, Eny2, Madd, Map4k4, Ptpn11]
GO:0051893	regulation of focal adhesion assembly	6.04184e-05	0.00217506	2.98505e-05	0.000298505	[6, 7, 8]	Group13	8.95522	6	Specific for Cluster #1	[Col16a1, Dusp3, Map4k4, Ptk2, Ptpn11]	[Macf1]	83.3333	16.6667	83.6631	16.3369	[Col16a1, Dusp3, Macf1, Map4k4, Ptk2, Ptpn11]
GO:0090278	negative regulation of peptide hormone secretion	0.00590581	0.0472465	2.98505e-05	0.000298505	[4, 5, 6, 7, 8, 9, 10]	Group13	5.6338	4	Specific for Cluster #1	[Eny2, Map4k4, Ptpn11]	[Madd]	75	25	75.4461	24.554	[Eny2, Madd, Map4k4, Ptpn11]
GO:0007162	negative regulation of cell adhesion	2.44078e-05	0.000927495	4.31811e-07	6.04536e-06	[3, 4, 5]	Group14	4.0625	13	Specific for Cluster #1	[Anxa1, Cd37, Cd44, Dusp3, Fgl2, Gpnmb, Hspb1, Lgals1, Lgals3, Mbp, Ptk2, Ptpn11, Tnfaip8l2]	[]	100	0	100	0	[Anxa1, Cd37, Cd44, Dusp3, Fgl2, Gpnmb, Hspb1, Lgals1, Lgals3, Mbp, Ptk2, Ptpn11, Tnfaip8l2]
GO:0002695	negative regulation of leukocyte activation	1.21832e-05	0.000511693	4.31811e-07	6.04536e-06	[3, 4, 5, 6]	Group14	5.14019	11	Specific for Cluster #1	[Anxa1, Cd200, Cd37, Cd44, Dusp3, Fgl2, Gpnmb, Hspb1, Lgals3, Tnfaip8l2]	[Cd200, Ldlr]	83.3333	16.6667	83.6631	16.3369	[Anxa1, Cd200, Cd37, Cd44, Dusp3, Fgl2, Gpnmb, Hspb1, Ldlr, Lgals3, Tnfaip8l2]
GO:0022408	negative regulation of cell-cell adhesion	1.32948e-05	0.000545089	4.31811e-07	6.04536e-06	[4, 5, 6]	Group14	5.09259	11	Specific for Cluster #1	[Anxa1, Cd37, Cd44, Dusp3, Fgl2, Gpnmb, Hspb1, Lgals3, Mbp, Ptk2, Tnfaip8l2]	[]	100	0	100	0	[Anxa1, Cd37, Cd44, Dusp3, Fgl2, Gpnmb, Hspb1, Lgals3, Mbp, Ptk2, Tnfaip8l2]
GO:0030850	prostate gland development	0.000481178	0.0105859	4.31811e-07	6.04536e-06	[4, 5, 6, 7]	Group14	7.8125	5	Specific for Cluster #1	[Anxa1, Cd44, Igf1, Psap, Serpinf1]	[]	100	0	100	0	[Anxa1, Cd44, Igf1, Psap, Serpinf1]
GO:1903037	regulation of leukocyte cell-cell adhesion	3.90862e-06	0.00016807	4.31811e-07	6.04536e-06	[5, 6]	Group14	4.18994	15	Specific for Cluster #1	[Anxa1, Cd37, Cd44, Dusp3, Fgl2, Gpnmb, Hspb1, Igf1, Igf2, Igfbp2, Itgb2, Lgals1, Lgals3, Tnfaip8l2, Zbtb16]	[]	100	0	100	0	[Anxa1, Cd37, Cd44, Dusp3, Fgl2, Gpnmb, Hspb1, Igf1, Igf2, Igfbp2, Itgb2, Lgals1, Lgals3, Tnfaip8l2, Zbtb16]
GO:0050868	negative regulation of T cell activation	1.94737e-05	0.000778949	4.31811e-07	6.04536e-06	[5, 6, 7, 8]	Group14	6.12245	9	Specific for Cluster #1	[Anxa1, Cd37, Cd44, Dusp3, Fgl2, Gpnmb, Hspb1, Lgals3, Tnfaip8l2]	[]	100	0	100	0	[Anxa1, Cd37, Cd44, Dusp3, Fgl2, Gpnmb, Hspb1, Lgals3, Tnfaip8l2]
GO:0045581	negative regulation of T cell differentiation	0.00267918	0.029471	4.31811e-07	6.04536e-06	[6, 7, 8, 9, 10, 11]	Group14	7.01754	4	Specific for Cluster #1	[Anxa1, Cd44, Fgl2, Hspb1]	[]	100	0	100	0	[Anxa1, Cd44, Fgl2, Hspb1]

## Sheet: Ventral Midbrain
ID	Term	Term PValue	Term PValue Corrected with Bonferroni step down	Group PValue	Group PValue Corrected with Bonferroni step down	GOLevels	GOGroups	% Associated Genes	Nr. Genes	Cluster	Genes Cluster #1	Genes Cluster #2	%Genes Cluster #1	%Genes Cluster #2	%Genes Cluster #1.adjusted.to.input.list.size	%Genes Cluster #2.adjusted.to.input.list.size	Associated Genes Found
GO:0051093	negative regulation of developmental process	1.62462e-05	0.027261	1.62462e-05	6.49846e-05	[2, 3, 4]	Group0	12.5127	123	None Specific Cluster	[Ascl1, Atf2, Atxn2, Brinp1, Cbln1, Cd86, Creb3l1, Egfr, Flcn, Foxo3, Frs2, Fzr1, Gadd45a, Gja1, Grin3a, Hdac2, Kcnk2, Lmx1a, Mapt, Mark1, Meis1, Ncoa3, Nkx6-1, Nme2, Pax6, Pi16, Prdx2, Prox1, Rcan1, Rgs4, Rtn4, Serpinf1, Sgpp1, Sox9, Spag9, Syngap1, Tcf15, Trib2, Tsc22d1, Wnt3, Yap1, Ybx3, Yy1]	[Adamts1, Adipor1, Ahr, Atp2b4, Bcl6, Bcr, Btg2, Calr, Cd160, Cd24, Cdc73, Cdk5rap2, Chad, Chadl, Chrd, Cited1, Col5a2, Crim1, Cst3, Daxx, Dlk1, Dnajb11, Dusp10, Efemp1, Fbln5, Fbxo7, Flt1, Gper1, Gsk3b, Gtf2i, Hdac8, Hes1, Hlx, Idua, Itgav, Itpkb, Limd1, Mapk1, Med28, Myc, N4bp2l2, Ncor2, Nfe2l2, Nlgn3, Nme1, Notch4, Ntn1, Ofd1, Olig2, Parp1, Plac8, Ppp2ca, RT1-M3-1, Rc3h1, Rest, Rgs2, Rtn4, Ruf…	34.6774	65.3226	40.28	59.72	[Adamts1, Adipor1, Ahr, Ascl1, Atf2, Atp2b4, Atxn2, Bcl6, Bcr, Brinp1, Btg2, Calr, Cbln1, Cd160, Cd24, Cd86, Cdc73, Cdk5rap2, Chad, Chadl, Chrd, Cited1, Col5a2, Creb3l1, Crim1, Cst3, Daxx, Dlk1, Dnajb11, Dusp10, Efemp1, Egfr, Fbln5, Fbxo7, Flcn, Flt1, Foxo3, Frs2, Fzr1, Gadd45a, Gja1, Gper1, Grin3a, Gsk3b, Gtf2i, Hdac2, Hdac8, Hes1, Hlx, Idua, Itgav, Itpkb, Kcnk2, Limd1, Lmx1a, Mapk1, Mapt, Mark1…
GO:0051726	regulation of cell cycle	1.98e-05	0.0331849	1.98e-05	3.96001e-05	[3, 4]	Group1	12.3876	124	Specific for Cluster #2	[Aatf, Abraxas1, Acvr1, Adarb1, Aif1, Ascl1, Atf2, Azin1, Bak1, Baz1b, Brinp1, Cdk17, Cep131, Cep97, Chmp2b, Creb3l1, Egfr, Flcn, Foxn3, Fzd9, Fzr1, Gadd45a, Gipc1, Gja1, Ing3, Map3k20, Map3k7, Mapk14, Nek7, Nupr2, Pggt1b, Prkca, Prox1, Rnf112, Rnf167, Rpl23, Sox9, Tfap4, Trim39, Yy1]	[Adamts1, Ahr, Aif1, Anapc4, Anapc5, Anapc7, Angel2, Atp2b4, Babam2, Bcr, Birc6, Brinp2, Brinp3, Btg1, Btg2, Btg3, Calr, Ccng2, Cdc27, Cdc73, Cdk5rap2, Cdkl1, Cenpv, Cep295nl, Chmp6, Cltc, Ctc1, Dynlt3, Dyrk3, Fbxo7, Fhl1, Gen1, Gper1, Hes1, Hus1, Ier3, Ints7, Klhl21, Lsm11, Mad1l1, Mad2l1, Mapk14, Morf4l2, Mtbp, Myc, Myo19, Nsmce2, Numa1, Pafah1b1, Pebp1, Pes1, Pkd2, Pkmyt1, Plpp2, Pnpt1, Ppp2ca…	31.746	68.254	37.1443	62.8557	[Aatf, Abraxas1, Acvr1, Adamts1, Adarb1, Ahr, Aif1, Anapc4, Anapc5, Anapc7, Angel2, Ascl1, Atf2, Atp2b4, Azin1, Babam2, Bak1, Baz1b, Bcr, Birc6, Brinp1, Brinp2, Brinp3, Btg1, Btg2, Btg3, Calr, Ccng2, Cdc27, Cdc73, Cdk17, Cdk5rap2, Cdkl1, Cenpv, Cep131, Cep295nl, Cep97, Chmp2b, Chmp6, Cltc, Creb3l1, Ctc1, Dynlt3, Dyrk3, Egfr, Fbxo7, Fhl1, Flcn, Foxn3, Fzd9, Fzr1, Gadd45a, Gen1, Gipc1, Gja1, Gper1,…
GO:0033554	cellular response to stress	1.51988e-05	0.0255187	1.51988e-05	7.59939e-05	[3]	Group2	11.275	214	Specific for Cluster #2	[Aatf, Abi3, Abraxas1, Aif1, Ap1s1, Atf2, Bag6, Bak1, Baz1b, Bfar, Ccdc88c, Cdip1, Creb3l1, Dnajb9, Egfr, Etv5, Fam129a, Fance, Flcn, Flot1, Flywch1, Foxn3, Foxo3, Fzr1, Gad1, Gadd45a, Get4, Grb2, Hdac2, Hmga1, Ing3, Kcnk2, Lamp2, Lrrk2, Map3k20, Map3k7, Mapk14, Mapt, Mcm4, Mcm9, Mta1, Ndel1, Ndp, Nme2, Nuak2, Nudt16l1, Nupr2, Ppp2r5c, Prdx2, Prelp, Prr5l, Pttg1, Recql5, Rfc2, Rnf167, Rtn4, Scn3a…	[Actr2, Aif1, Arid2, Asf1a, Asl, Atf3, Atf6b, Atp2a2, Avpr1a, Babam2, Bach1, Bcl6, Btg2, Calr, Cblb, Chst3, Clcn2, Clgn, Cntn1, Cst3, Ctc1, Daxx, Derl1, Dusp10, Dyrk3, Egln3, Eif2ak1, Eif2b5, Endov, Erp29, Erp44, Fancb, Fbln5, Fh, Fis1, Flt1, Foxred2, Fyn, Gap43, Gcn1, Gen1, Gpr37, Gsk3b, Gtf2h3, Hsph1, Hus1, Ier3, Insig2, Ints7, Jkamp, Map2k6, Mapk1, Mapk14, Mapk9, Mapkapk5, Marcks, Mcm7, Morf4l…	33.6406	66.3594	39.1761	60.8239	[Aatf, Abi3, Abraxas1, Actr2, Aif1, Ap1s1, Arid2, Asf1a, Asl, Atf2, Atf3, Atf6b, Atp2a2, Avpr1a, Babam2, Bach1, Bag6, Bak1, Baz1b, Bcl6, Bfar, Btg2, Calr, Cblb, Ccdc88c, Cdip1, Chst3, Clcn2, Clgn, Cntn1, Creb3l1, Cst3, Ctc1, Daxx, Derl1, Dnajb9, Dusp10, Dyrk3, Egfr, Egln3, Eif2ak1, Eif2b5, Endov, Erp29, Erp44, Etv5, Fam129a, Fancb, Fance, Fbln5, Fh, Fis1, Flcn, Flot1, Flt1, Flywch1, Foxn3, Foxo3,…
GO:0035556	intracellular signal transduction	7.74456e-06	0.0130418	7.74456e-06	5.42119e-05	[3, 4, 5]	Group3	10.8804	283	Specific for Cluster #2	[Abraxas1, Acvr1, Acvr2a, Adora2b, Aif1, Akap6, Ap1s1, Arfgef1, Atf2, Bag6, Bak1, C1qtnf2, Ccdc88c, Cd86, Cdip1, Creb3l1, Crk, Dnajc27, Dock4, Egfr, Fibin, Flcn, Flot1, Foxn3, Foxo3, Frs2, Fzr1, Gadd45a, Gpat3, Grb2, Hcls1, Hdac2, Heg1, Hmga1, Irak3, Kcnc2, Llgl1, Lrrk2, Map3k20, Map3k7, Mapk14, Mapt, Mark1, Ndp, Nelfe, Nfkbil1, Nuak2, Oxtr, P2rx4, P2rx7, Pde9a, Phlpp1, Ppp2r5c, Prdx2, Prkca, Pro…	[Adcy3, Adipor1, Adora1, Ahr, Aif1, Aip, Akap1, Angpt1, Arhgap30, Arhgap31, Arhgap44, Arhgdib, Arhgef6, Atf3, Atp1b1, Atp2a2, Atp2b4, Atp6ap2, Avpr1a, Babam2, Bcl6, Bcr, Bmx, Calr, Car8, Cblb, Cd160, Cd24, Cdc42bpa, Cdk5rap2, Cited1, Cntn1, Col3a1, Col6a1, Col6a2, Crhr1, Crkl, Csnk2b, Cxcr4, Cyth1, Cyth3, Daxx, Dhx15, Drd5, Dstyk, Dusp10, Dvl3, Dyrk3, Eif2ak1, Erp29, Fbxo7, Fis1, Flt1, Fyn, G2e3,…	30.662	69.338	35.9731	64.0269	[Abraxas1, Acvr1, Acvr2a, Adcy3, Adipor1, Adora1, Adora2b, Ahr, Aif1, Aip, Akap1, Akap6, Angpt1, Ap1s1, Arfgef1, Arhgap30, Arhgap31, Arhgap44, Arhgdib, Arhgef6, Atf2, Atf3, Atp1b1, Atp2a2, Atp2b4, Atp6ap2, Avpr1a, Babam2, Bag6, Bak1, Bcl6, Bcr, Bmx, C1qtnf2, Calr, Car8, Cblb, Ccdc88c, Cd160, Cd24, Cd86, Cdc42bpa, Cdip1, Cdk5rap2, Cited1, Cntn1, Col3a1, Col6a1, Col6a2, Creb3l1, Crhr1, Crk, Crkl, C…
GO:0048731	system development	9.87264e-06	0.0166058	9.87264e-06	5.92358e-05	[3, 4]	Group4	10.2003	443	Specific for Cluster #2	[Abi3, Acvr1, Acvr2a, Adarb1, Adgre5, Aif1, Akap6, Arfgef1, Ascl1, Atf2, Atp5f1b, Atxn2, Bag6, Baiap2, Bak1, Bbx, Boc, Brinp1, C1ql1, Cbln1, Cd86, Clec3b, Commd5, Coro1c, Creb3l1, Crk, Disp1, Dock4, Ebp, Egfr, Ehhadh, Elk3, Enpp2, Ess2, Etv5, Fjx1, Flcn, Flot1, Flrt3, Foxn3, Foxo3, Frs2, Fryl, Ftsj1, Fzd6, Fzd9, Fzr1, Gadd45a, Gatm, Gja1, Grb2, Grin3a, Gzf1, Hdac2, Heg1, Hmga1, Hnrnpd, Hoxd1, Hsd…	[Aard, Aatk, Abat, Actl6b, Actr2, Adam1a, Adamts1, Adora2a, Ahr, Aif1, Aimp2, Ak2, Alcam, Aldh9a1, Anapc7, Angpt1, Apln, Arhgap44, Arid2, Arl6, Asl, Astn1, Atat1, Atp2b4, Atp6ap2, Avpr1a, B9d1, Bace2, Bcl6, Bcr, Bdh1, Bfsp1, Brd2, Brinp2, Brinp3, Btg1, Btg2, Cacybp, Calr, Cblb, Cbln4, Cd160, Cd24, Cd38, Cdk5rap2, Cdkl1, Chad, Chadl, Chrd, Chrdl1, Chst3, Cited1, Clcn2, Clip1, Cntn1, Col3a1, Col5a2…	33.0357	66.9643	38.5295	61.4705	[Aard, Aatk, Abat, Abi3, Actl6b, Actr2, Acvr1, Acvr2a, Adam1a, Adamts1, Adarb1, Adgre5, Adora2a, Ahr, Aif1, Aimp2, Ak2, Akap6, Alcam, Aldh9a1, Anapc7, Angpt1, Apln, Arfgef1, Arhgap44, Arid2, Arl6, Ascl1, Asl, Astn1, Atat1, Atf2, Atp2b4, Atp5f1b, Atp6ap2, Atxn2, Avpr1a, B9d1, Bace2, Bag6, Baiap2, Bak1, Bbx, Bcl6, Bcr, Bdh1, Bfsp1, Boc, Brd2, Brinp1, Brinp2, Brinp3, Btg1, Btg2, C1ql1, Cacybp, Calr,…
GO:0007399	nervous system development	4.3884e-06	0.00739885	9.87264e-06	5.92358e-05	[4, 5]	Group4	10.8849	294	Specific for Cluster #2	[Abi3, Adarb1, Adgre5, Aif1, Arfgef1, Ascl1, Atf2, Atxn2, Bag6, Baiap2, Boc, Brinp1, C1ql1, Cbln1, Coro1c, Crk, Dock4, Egfr, Enpp2, Ess2, Etv5, Flot1, Flrt3, Foxo3, Frs2, Fryl, Ftsj1, Fzd6, Fzd9, Fzr1, Gja1, Grb2, Grin3a, Hdac2, Hmga1, Hnrnpd, Hoxd1, Ipmk, Kcnc2, Kif5a, Lgr4, Lgr6, Llgl1, Lmx1a, Lpin1, Lrrk2, Map3k7, Mapt, Mark1, Meis1, Mpst, Myo1d, Napa, Ncoa3, Ndel1, Ndp, Nkx6-1, Nme2, Nptxr, O…	[Aatk, Abat, Actl6b, Actr2, Adamts1, Adora2a, Aif1, Alcam, Anapc7, Arhgap44, Arl6, Astn1, Atat1, Atp2b4, Atp6ap2, Avpr1a, Bace2, Bcl6, Bcr, Brd2, Brinp2, Brinp3, Btg2, Calr, Cbln4, Cd24, Cd38, Cdk5rap2, Chrd, Chrdl1, Chst3, Cited1, Clcn2, Clip1, Cntn1, Col3a1, Col6a1, Cpne5, Crhr1, Crkl, Cthrc1, Ctnna2, Cux2, Cxcr4, Degs1, Dnah11, Dnajb11, Dscam, Dusp10, Dvl3, Edc4, Efemp1, Eif2b5, Etv6, Fabp7, F…	32.8859	67.1141	38.3691	61.6309	[Aatk, Abat, Abi3, Actl6b, Actr2, Adamts1, Adarb1, Adgre5, Adora2a, Aif1, Alcam, Anapc7, Arfgef1, Arhgap44, Arl6, Ascl1, Astn1, Atat1, Atf2, Atp2b4, Atp6ap2, Atxn2, Avpr1a, Bace2, Bag6, Baiap2, Bcl6, Bcr, Boc, Brd2, Brinp1, Brinp2, Brinp3, Btg2, C1ql1, Calr, Cbln1, Cbln4, Cd24, Cd38, Cdk5rap2, Chrd, Chrdl1, Chst3, Cited1, Clcn2, Clip1, Cntn1, Col3a1, Col6a1, Coro1c, Cpne5, Crhr1, Crk, Crkl, Cthrc…
GO:1901698	response to nitrogen compound	2.43642e-05	0.0407857	2.43642e-05	2.43642e-05	[3]	Group5	11.5923	174	Specific for Cluster #2	[Adora2b, Aif1, Akap6, Ascl1, Atf2, Atp5f1b, Atp5po, Bag6, Baiap2, Cd55, Crk, Dnajb9, Egfr, Flot1, Foxo3, Fzr1, Gad1, Gatm, Get4, Gja1, Grb2, Hdac2, Hmga1, Hnrnpd, Irak3, Kcnc2, Leprot, Lpin1, Lrrk2, Lta4h, Map3k7, Mapk14, Myo1d, Ndel1, Nkx6-1, Nme2, Oxtr, P2rx4, P2rx7, Pax6, Prkca, Psmb9, Recql5, Rgs4, Rgs8, Rpl23, Rplp0, Rtfdc1, Sox9, Srsf5, Taf1, Trim41, Ubxn4, Usp25, Zcchc2]	[Abat, Abcc5, Actr2, Adamts13, Adipor1, Adora1, Adora2a, Adss, Ahr, Aif1, Akap1, Asl, Atp2b4, Bdh1, Btg1, Btg2, Cacnb1, Cacng4, Cacybp, Calr, Chrne, Cited1, Clgn, Cntn1, Col3a1, Col6a1, Crhr1, Crkl, Cxcr4, Daxx, Derl1, Dhx15, Drd5, Eif2b5, Fancb, Foxred2, Fundc1, Fyn, Gabra1, Gabrb1, Gabrg2, Gna11, Gna12, Gna15, Gper1, Gsk3b, Hdac8, Hes1, Hnmt, Hnrnpd, Insig2, Irs3, Itgb2, Jkamp, Kcnc2, Kcnq3, Ly…	30.8989	69.1011	36.2296	63.7704	[Abat, Abcc5, Actr2, Adamts13, Adipor1, Adora1, Adora2a, Adora2b, Adss, Ahr, Aif1, Akap1, Akap6, Ascl1, Asl, Atf2, Atp2b4, Atp5f1b, Atp5po, Bag6, Baiap2, Bdh1, Btg1, Btg2, Cacnb1, Cacng4, Cacybp, Calr, Cd55, Chrne, Cited1, Clgn, Cntn1, Col3a1, Col6a1, Crhr1, Crk, Crkl, Cxcr4, Daxx, Derl1, Dhx15, Dnajb9, Drd5, Egfr, Eif2b5, Fancb, Flot1, Foxo3, Foxred2, Fundc1, Fyn, Fzr1, Gabra1, Gabrb1, Gabrg2, G…
GO:0010243	response to organonitrogen compound	1.27598e-05	0.0214493	2.43642e-05	2.43642e-05	[4]	Group5	11.828	165	Specific for Cluster #2	[Adora2b, Aif1, Akap6, Ascl1, Atf2, Atp5f1b, Atp5po, Bag6, Baiap2, Cd55, Crk, Dnajb9, Egfr, Foxo3, Fzr1, Gad1, Gatm, Get4, Gja1, Grb2, Hdac2, Hmga1, Hnrnpd, Irak3, Kcnc2, Leprot, Lpin1, Lrrk2, Lta4h, Map3k7, Mapk14, Myo1d, Ndel1, Nkx6-1, Nme2, Oxtr, P2rx4, P2rx7, Pax6, Prkca, Psmb9, Recql5, Rgs4, Rgs8, Rpl23, Rplp0, Sox9, Srsf5, Taf1, Trim41, Ubxn4, Usp25, Zcchc2]	[Abat, Abcc5, Actr2, Adamts13, Adipor1, Adora1, Adora2a, Adss, Ahr, Aif1, Akap1, Asl, Bdh1, Btg1, Btg2, Cacnb1, Cacng4, Cacybp, Calr, Cited1, Clgn, Cntn1, Col3a1, Col6a1, Crhr1, Cxcr4, Derl1, Dhx15, Drd5, Eif2b5, Fancb, Foxred2, Fundc1, Fyn, Gabra1, Gabrb1, Gabrg2, Gna11, Gna12, Gna15, Gper1, Gsk3b, Hdac8, Hes1, Hnmt, Hnrnpd, Insig2, Irs3, Itgb2, Jkamp, Kcnc2, Mapk1, Mapk14, Mapk9, Marcks, Mgst3,…	31.3609	68.6391	36.729	63.271	[Abat, Abcc5, Actr2, Adamts13, Adipor1, Adora1, Adora2a, Adora2b, Adss, Ahr, Aif1, Akap1, Akap6, Ascl1, Asl, Atf2, Atp5f1b, Atp5po, Bag6, Baiap2, Bdh1, Btg1, Btg2, Cacnb1, Cacng4, Cacybp, Calr, Cd55, Cited1, Clgn, Cntn1, Col3a1, Col6a1, Crhr1, Crk, Cxcr4, Derl1, Dhx15, Dnajb9, Drd5, Egfr, Eif2b5, Fancb, Foxo3, Foxred2, Fundc1, Fyn, Fzr1, Gabra1, Gabrb1, Gabrg2, Gad1, Gatm, Get4, Gja1, Gna11, Gna1…
GO:0043412	macromolecule modification	1.83024e-05	0.0306931	1.83024e-05	5.49072e-05	[4]	Group6	11.0396	240	Specific for Cluster #2	[Acvr1, Acvr2a, Adarb1, Aif1, Akap6, Ap1s1, Arfgef1, Atf2, B3galt2, B4galt3, B4galt4, Bag6, Bak1, Baz1b, Bfar, Ccdc88c, Cops6, Coro1c, Desi1, Egfr, Enpp2, Fam129a, Flcn, Flot1, Ftsj1, Fzr1, Gadd45a, Hcls1, Hdac2, Hnrnpab, Klhdc2, Lmf1, Lrrk2, Map3k20, Map3k7, Mapt, Mark1, Mettl16, Mgat2, Mta1, Ndp, Nek7, Nelfe, Nme2, Nmt1, Nuak2, Nus1, P2rx7, Pax6, Pggt1b, Phlpp1, Pmm1, Ppp1r11, Prkca, Prr5l, RT1…	[Adora1, Aif1, Aimp2, Akap1, Anapc16, Anapc4, Anapc5, Anapc7, Angpt1, Ankib1, Arel1, Atat1, Atg3, Atp2b4, B3galt4, Cblb, Cd24, Cd80, Cdc27, Cdc42bpa, Cdk2ap1, Cntn1, Cog3, Cops4, Crkl, Cxcr4, Daxx, Dcaf5, Derl1, Dlg3, Dnajb11, Dohh, Dusp18, Dvl3, Dyrk3, Efemp1, Eif2ak1, Emp2, Erp29, Fam20a, Fbxo28, Fbxo7, Flt1, Fyn, G2e3, Galnt10, Galnt16, Gnl3l, Gper1, Gsk3b, Gskip, Gstt1, Hace1, Hdac8, Hes1, Hu…	31.9502	68.0498	37.3642	62.6358	[Acvr1, Acvr2a, Adarb1, Adora1, Aif1, Aimp2, Akap1, Akap6, Anapc16, Anapc4, Anapc5, Anapc7, Angpt1, Ankib1, Ap1s1, Arel1, Arfgef1, Atat1, Atf2, Atg3, Atp2b4, B3galt2, B3galt4, B4galt3, B4galt4, Bag6, Bak1, Baz1b, Bfar, Cblb, Ccdc88c, Cd24, Cd80, Cdc27, Cdc42bpa, Cdk2ap1, Cntn1, Cog3, Cops4, Cops6, Coro1c, Crkl, Cxcr4, Daxx, Dcaf5, Derl1, Desi1, Dlg3, Dnajb11, Dohh, Dusp18, Dvl3, Dyrk3, Efemp1, Eg…
GO:0036211	protein modification process	9.27632e-06	0.015612	1.83024e-05	5.49072e-05	[4, 5]	Group6	11.2494	226	Specific for Cluster #2	[Acvr1, Acvr2a, Adarb1, Aif1, Akap6, Ap1s1, Arfgef1, Atf2, B3galt2, B4galt3, B4galt4, Bag6, Bak1, Baz1b, Bfar, Ccdc88c, Cops6, Coro1c, Desi1, Egfr, Enpp2, Fam129a, Flcn, Flot1, Fzr1, Gadd45a, Hcls1, Hdac2, Klhdc2, Lmf1, Lrrk2, Map3k20, Map3k7, Mapt, Mark1, Mgat2, Mta1, Ndp, Nek7, Nelfe, Nme2, Nmt1, Nuak2, Nus1, P2rx7, Pax6, Pggt1b, Phlpp1, Pmm1, Ppp1r11, Prkca, Prr5l, RT1-Db1, Rab3gap1, Rab3gap2,…	[Adora1, Aif1, Aimp2, Akap1, Anapc16, Anapc4, Anapc5, Anapc7, Angpt1, Ankib1, Arel1, Atat1, Atg3, Atp2b4, B3galt4, Cblb, Cd24, Cd80, Cdc27, Cdc42bpa, Cdk2ap1, Cntn1, Cog3, Cops4, Crkl, Cxcr4, Daxx, Dcaf5, Derl1, Dlg3, Dohh, Dusp18, Dvl3, Dyrk3, Efemp1, Eif2ak1, Emp2, Erp29, Fam20a, Fbxo28, Fbxo7, Flt1, Fyn, G2e3, Galnt10, Galnt16, Gnl3l, Gper1, Gsk3b, Gskip, Hace1, Hdac8, Hes1, Hus1, Il23a, Itgb2…	31.7181	68.2819	37.1142	62.8858	[Acvr1, Acvr2a, Adarb1, Adora1, Aif1, Aimp2, Akap1, Akap6, Anapc16, Anapc4, Anapc5, Anapc7, Angpt1, Ankib1, Ap1s1, Arel1, Arfgef1, Atat1, Atf2, Atg3, Atp2b4, B3galt2, B3galt4, B4galt3, B4galt4, Bag6, Bak1, Baz1b, Bfar, Cblb, Ccdc88c, Cd24, Cd80, Cdc27, Cdc42bpa, Cdk2ap1, Cntn1, Cog3, Cops4, Cops6, Coro1c, Crkl, Cxcr4, Daxx, Dcaf5, Derl1, Desi1, Dlg3, Dohh, Dusp18, Dvl3, Dyrk3, Efemp1, Egfr, Eif2a…
GO:0070727	cellular macromolecule localization	6.72072e-10	1.1358e-06	3.87143e-09	3.09714e-08	[3]	Group7	11.8292	302	Specific for Cluster #2	[Abcg1, Abi3, Akap10, Ap1s1, Ap4m1, Arf2, Arfgef1, Arl1, Atf2, Bag6, Baiap2, Cbln1, Cep131, Champ1, Chmp2b, Cog1, Coro1c, Cox18, Crk, Cuta, Desi1, Dnajc27, Egfr, Etv5, Flcn, Flot1, Fzd9, Fzr1, Get4, Gipc1, Gja1, Guk1, Hcls1, Heg1, Hmga1, Hnrnpab, Jakmip1, Kif5a, Kpna6, Lamp2, Leprot, Lmf1, Lrrk2, Lsg1, Mapk14, Mapt, Mcm9, Mon2, Myo1d, Napa, Ndel1, Ndp, Nectin3, Nkx6-1, Nmt1, Nptxr, Nsf, Nuak2, Nu…	[Abat, Adora1, Adora2a, Ahr, Aip, Akap1, Angpt1, Ankrd13a, Arhgap44, Arl6, Atg3, Atp1b1, Atp2b4, B9d1, Bcl6, Bcr, Brd2, Cabp1, Cacna1e, Cacnb1, Cacng4, Cacng5, Cadm3, Calr, Cbln4, Ccdc91, Ccdc93, Cct6a, Cct8, Cd24, Cd38, Cep350, Chrd, Chrdl1, Clip1, Cltc, Cnst, Cog3, Crkl, Daxx, Derl1, Dlg3, Dnah11, Dnajc1, Dpp10, Dvl3, Elavl1, Emc4, Emp2, Erp29, Fbln5, Fbxo7, Fis1, Fyn, Gcc2, Gdap1, Glis2, Gna11…	34.2105	65.7895	39.7836	60.2164	[Abat, Abcg1, Abi3, Adora1, Adora2a, Ahr, Aip, Akap1, Akap10, Angpt1, Ankrd13a, Ap1s1, Ap4m1, Arf2, Arfgef1, Arhgap44, Arl1, Arl6, Atf2, Atg3, Atp1b1, Atp2b4, B9d1, Bag6, Baiap2, Bcl6, Bcr, Brd2, Cabp1, Cacna1e, Cacnb1, Cacng4, Cacng5, Cadm3, Calr, Cbln1, Cbln4, Ccdc91, Ccdc93, Cct6a, Cct8, Cd24, Cd38, Cep131, Cep350, Champ1, Chmp2b, Chrd, Chrdl1, Clip1, Cltc, Cnst, Cog1, Cog3, Coro1c, Cox18, Crk…
GO:0046907	intracellular transport	5.84315e-07	0.000986324	3.87143e-09	3.09714e-08	[3, 4]	Group7	12.3887	167	None Specific Cluster	[Abcg1, Ap1s1, Ap4m1, Arf2, Arl1, Atf2, Ccdc88c, Cep131, Chmp2b, Coro1c, Desi1, Dnajc27, Fzr1, Hcls1, Hnrnpd, Kif5a, Kpna6, Lamp2, Leprot, Lmf1, Lrrk2, Lsg1, Mapk14, Mapt, Mon2, Myo1d, Napa, Ndel1, Ndp, Nsf, Nup54, Nus1, Nxt1, Pax6, Pdzk1, Pom121, Prr5l, RGD1310429, Rab21, Rhot1, Rilp, Sar1a, Sec24a, Sgpp1, Snupn, Snx8, Spag9, Sqstm1, Syt7, Tap2, Tmed4, Trappc5, Trip11, Ttc21b, Vapb, Vps37b, Wdr1…	[Actr2, Akap1, Angpt1, Arhgap44, Arl6, Atp2a2, Bcr, Cabp1, Cacng4, Cacng5, Calr, Ccdc91, Ccdc93, Cd24, Cdc42bpa, Chmp6, Cited1, Clip1, Cltc, Cnih4, Cog3, Ddx39b, Derl1, Dync2li1, Elavl1, Emp2, Ergic1, Erp29, Gcc2, Gnptab, Gosr2, Gper1, Grip1, Gsk3b, Hnrnpd, Ier3, Ift57, Kcnq3, Kdelr2, Kif1bp, Kif5c, Klhl12, Ldlrap1, Mapk1, Mapk14, Marcks, Mgrn1, Mlxip, Mtch1, Myo19, Napb, Neurod1, Nrde2, Ntn1, Nu…	34.9112	65.0888	40.5282	59.4718	[Abcg1, Actr2, Akap1, Angpt1, Ap1s1, Ap4m1, Arf2, Arhgap44, Arl1, Arl6, Atf2, Atp2a2, Bcr, Cabp1, Cacng4, Cacng5, Calr, Ccdc88c, Ccdc91, Ccdc93, Cd24, Cdc42bpa, Cep131, Chmp2b, Chmp6, Cited1, Clip1, Cltc, Cnih4, Cog3, Coro1c, Ddx39b, Derl1, Desi1, Dnajc27, Dync2li1, Elavl1, Emp2, Ergic1, Erp29, Fzr1, Gcc2, Gnptab, Gosr2, Gper1, Grip1, Gsk3b, Hcls1, Hnrnpd, Ier3, Ift57, Kcnq3, Kdelr2, Kif1bp, Kif5…
GO:0045184	establishment of protein localization	8.27992e-10	1.39848e-06	3.87143e-09	3.09714e-08	[3, 5]	Group7	12.7865	212	None Specific Cluster	[Abcg1, Ap1s1, Ap4m1, Arf2, Arfgef1, Arl1, Atf2, Bag6, Cbln1, Cep131, Chmp2b, Cog1, Coro1c, Cox18, Desi1, Dnajc27, Egfr, Fzr1, Get4, Gipc1, Gja1, Guk1, Hcls1, Hmga1, Jakmip1, Kif5a, Kpna6, Lamp2, Lmf1, Lrrk2, Lsg1, Mapk14, Mapt, Mon2, Myo1d, Napa, Ndel1, Ndp, Nectin3, Nkx6-1, Nsf, Nup54, Nxt1, P2rx7, Pclo, Pdzk1, Pfkl, Pom121, Prkca, Prr5l, Ptprn2, RGD1310429, RT1-Db1, Rab21, Rab3gap1, Rab3gap2, …	[Abat, Adora1, Adora2a, Aip, Akap1, Angpt1, Arhgap44, Arl6, Atg3, Bcr, Cabp1, Cacna1e, Cacnb1, Cacng4, Cacng5, Calr, Cbln4, Ccdc91, Ccdc93, Cct6a, Cct8, Cd24, Cd38, Chrd, Clip1, Cltc, Cnst, Cog3, Derl1, Dnajc1, Elavl1, Emc4, Erp29, Fbxo7, Fis1, Fyn, Gcc2, Gdap1, Gna11, Gnaz, Gnptab, Gosr2, Gper1, Gpm6b, Grip1, Gsk3b, Hps4, Hpse, Hsph1, Idua, Immp1l, Kcnq3, Kdelr2, Kif5c, Lamp5, Lrwd1, Mapk1, Mapk…	34.7418	65.2582	40.3483	59.6517	[Abat, Abcg1, Adora1, Adora2a, Aip, Akap1, Angpt1, Ap1s1, Ap4m1, Arf2, Arfgef1, Arhgap44, Arl1, Arl6, Atf2, Atg3, Bag6, Bcr, Cabp1, Cacna1e, Cacnb1, Cacng4, Cacng5, Calr, Cbln1, Cbln4, Ccdc91, Ccdc93, Cct6a, Cct8, Cd24, Cd38, Cep131, Chmp2b, Chrd, Clip1, Cltc, Cnst, Cog1, Cog3, Coro1c, Cox18, Derl1, Desi1, Dnajc1, Dnajc27, Egfr, Elavl1, Emc4, Erp29, Fbxo7, Fis1, Fyn, Fzr1, Gcc2, Gdap1, Get4, Gipc…
GO:0071705	nitrogen compound transport	1.43852e-05	0.0241672	3.87143e-09	3.09714e-08	[4]	Group7	11.2937	213	None Specific Cluster	[Abcg1, Adora2b, Ap1s1, Ap4m1, Arf2, Arfgef1, Arl1, Atf2, Atp13a4, Azin1, Cbln1, Cep131, Chmp2b, Cog1, Desi1, Disp1, Dnajc27, Egfr, Flot1, Fzr1, Gipc1, Gja1, Guk1, Hcls1, Hmga1, Jakmip1, Kif5a, Kpna6, Lamp2, Lmf1, Lrrk2, Lsg1, Mapk14, Mapt, Mon2, Myo1d, Napa, Ndel1, Ndp, Nkx6-1, Nsf, Nup54, Nxt1, Oxtr, P2rx7, Pclo, Pdzk1, Pfkl, Pom121, Prr5l, Ptprn2, RGD1310429, RT1-Db1, Rab21, Rab3gap1, Rabif, R…	[Abat, Abcc5, Adora1, Adora2a, Akap1, Angpt1, Apln, Arhgap44, Arl6, Atg3, Avpr1a, Bcr, Cabp1, Cacna1e, Cacng4, Cacng5, Calr, Cbln4, Ccdc91, Ccdc93, Cd24, Cd38, Chrd, Clip1, Cltc, Cnst, Cog3, Crhr1, Ddx39b, Derl1, Dnajc1, Elavl1, Erp29, Gcc2, Gna11, Gnaz, Gnptab, Gosr2, Gper1, Gpm6b, Grip1, Gsk3b, Hpse, Idua, Kcnq3, Kdelr2, Kif5c, Lrrc8b, Mapk1, Mapk14, Marcks, Mpc2, Mtch1, Mtx2, Nagpa, Napb, Neur…	36.7442	63.2558	42.4636	57.5364	[Abat, Abcc5, Abcg1, Adora1, Adora2a, Adora2b, Akap1, Angpt1, Ap1s1, Ap4m1, Apln, Arf2, Arfgef1, Arhgap44, Arl1, Arl6, Atf2, Atg3, Atp13a4, Avpr1a, Azin1, Bcr, Cabp1, Cacna1e, Cacng4, Cacng5, Calr, Cbln1, Cbln4, Ccdc91, Ccdc93, Cd24, Cd38, Cep131, Chmp2b, Chrd, Clip1, Cltc, Cnst, Cog1, Cog3, Crhr1, Ddx39b, Derl1, Desi1, Disp1, Dnajc1, Dnajc27, Egfr, Elavl1, Erp29, Flot1, Fzr1, Gcc2, Gipc1, Gja1, …
GO:0015031	protein transport	1.36452e-06	0.00230194	3.87143e-09	3.09714e-08	[4, 5, 6]	Group7	12.1934	169	None Specific Cluster	[Abcg1, Ap1s1, Ap4m1, Arf2, Arfgef1, Arl1, Atf2, Cbln1, Cep131, Chmp2b, Cog1, Desi1, Dnajc27, Egfr, Fzr1, Gja1, Guk1, Hcls1, Hmga1, Jakmip1, Kif5a, Kpna6, Lamp2, Lmf1, Lrrk2, Lsg1, Mapk14, Mon2, Myo1d, Napa, Ndel1, Ndp, Nkx6-1, Nsf, Nup54, Nxt1, P2rx7, Pclo, Pfkl, Pom121, Prr5l, Ptprn2, RGD1310429, RT1-Db1, Rab21, Rabif, Sar1a, Sec24a, Slc15a4, Snap29, Snupn, Snx8, Sqstm1, Syt7, Tap2, Tmed4, Tomm…	[Abat, Adora2a, Akap1, Angpt1, Arhgap44, Arl6, Atg3, Bcr, Cabp1, Cacna1e, Cacng4, Cacng5, Calr, Cbln4, Ccdc91, Ccdc93, Cd24, Cd38, Chrd, Clip1, Cltc, Cnst, Cog3, Derl1, Dnajc1, Elavl1, Erp29, Gcc2, Gna11, Gnaz, Gnptab, Gosr2, Gper1, Gpm6b, Grip1, Gsk3b, Hpse, Idua, Kcnq3, Kdelr2, Kif5c, Mapk1, Mapk14, Marcks, Mpc2, Mtch1, Mtx2, Nagpa, Napb, Neurod1, Nos1, Nup153, Nup85, Orai1, Pafah1b1, Pam16, Pk…	35.2941	64.7059	40.9339	59.0661	[Abat, Abcg1, Adora2a, Akap1, Angpt1, Ap1s1, Ap4m1, Arf2, Arfgef1, Arhgap44, Arl1, Arl6, Atf2, Atg3, Bcr, Cabp1, Cacna1e, Cacng4, Cacng5, Calr, Cbln1, Cbln4, Ccdc91, Ccdc93, Cd24, Cd38, Cep131, Chmp2b, Chrd, Clip1, Cltc, Cnst, Cog1, Cog3, Derl1, Desi1, Dnajc1, Dnajc27, Egfr, Elavl1, Erp29, Fzr1, Gcc2, Gja1, Gna11, Gnaz, Gnptab, Gosr2, Gper1, Gpm6b, Grip1, Gsk3b, Guk1, Hcls1, Hmga1, Hpse, Idua, Ja…
GO:0033365	protein localization to organelle	2.10293e-05	0.035224	3.87143e-09	3.09714e-08	[5]	Group7	12.4363	122	Specific for Cluster #2	[Ap4m1, Arl1, Atf2, Bag6, Cep131, Champ1, Cox18, Flcn, Fzr1, Get4, Gja1, Hcls1, Kpna6, Lamp2, Lrrk2, Mapk14, Mapt, Mcm9, Ndp, Nptxr, Nuak2, Nup54, Pax6, Pom121, Rab3gap1, Rab3gap2, Rtn4, Skp1, Snupn, Sox9, Sqstm1, Srp72, Supt7l, Tomm40l, Ttc21b, Tulp3, Utp25, Vps37b, Wdr19, Yap1, Zdhhc3]	[Ahr, Aip, Akap1, Angpt1, Ankrd13a, Arl6, Brd2, Cabp1, Cacng4, Cacng5, Calr, Cct6a, Cct8, Cep350, Cog3, Daxx, Dnah11, Elavl1, Emc4, Fbxo7, Fis1, Fyn, Gcc2, Gdap1, Glis2, Gnl3l, Gnptab, Golgb1, Gpc4, Gper1, Gsk3b, Hsph1, Immp1l, Insig2, Iqce, Kcnq3, Kdelr2, Klhl21, Lamp5, Lrwd1, Mapk1, Mapk14, Mapk9, Mtbp, Mtch1, Naca, Ncln, Nin, Nptx1, Nptx2, Numa1, Nup153, Nup85, Nvl, Ogt, Pam16, Parp1, Pes1, Pp…	33.0645	66.9355	38.5603	61.4397	[Ahr, Aip, Akap1, Angpt1, Ankrd13a, Ap4m1, Arl1, Arl6, Atf2, Bag6, Brd2, Cabp1, Cacng4, Cacng5, Calr, Cct6a, Cct8, Cep131, Cep350, Champ1, Cog3, Cox18, Daxx, Dnah11, Elavl1, Emc4, Fbxo7, Fis1, Flcn, Fyn, Fzr1, Gcc2, Gdap1, Get4, Gja1, Glis2, Gnl3l, Gnptab, Golgb1, Gpc4, Gper1, Gsk3b, Hcls1, Hsph1, Immp1l, Insig2, Iqce, Kcnq3, Kdelr2, Klhl21, Kpna6, Lamp2, Lamp5, Lrrk2, Lrwd1, Mapk1, Mapk14, Mapk9…
GO:0006886	intracellular protein transport	5.69762e-06	0.00960049	3.87143e-09	3.09714e-08	[4, 5, 6, 7]	Group7	13.6905	92	Specific for Cluster #2	[Ap1s1, Ap4m1, Arf2, Arl1, Atf2, Cep131, Desi1, Dnajc27, Fzr1, Hcls1, Kif5a, Kpna6, Lamp2, Lrrk2, Mapk14, Napa, Ndel1, Ndp, Nsf, Nup54, Nxt1, Pom121, Prr5l, RGD1310429, Rab21, Sar1a, Sec24a, Snupn, Snx8, Sqstm1, Tmed4, Vps37b]	[Akap1, Angpt1, Arhgap44, Arl6, Bcr, Cabp1, Cacng4, Cacng5, Calr, Cd24, Clip1, Cltc, Cog3, Derl1, Elavl1, Erp29, Gcc2, Gnptab, Gper1, Grip1, Gsk3b, Kcnq3, Kif5c, Mapk1, Mapk14, Marcks, Mtch1, Napb, Nup153, Nup85, Ppp2ca, Ptgs2, Pttg1ip, Ran, Rangrf, Rhob, Rilpl1, Rilpl2, Rims2, Rph3a, Rufy3, Sar1b, Sec23a, Sec61g, Sel1l, Slu7, Snx13, Snx6, Stx17, Stx8, Stxbp2, Timm44, Tmed2, Tmed7, Tnpo2, Tomm70,…	34.4086	65.5914	39.9943	60.0057	[Akap1, Angpt1, Ap1s1, Ap4m1, Arf2, Arhgap44, Arl1, Arl6, Atf2, Bcr, Cabp1, Cacng4, Cacng5, Calr, Cd24, Cep131, Clip1, Cltc, Cog3, Derl1, Desi1, Dnajc27, Elavl1, Erp29, Fzr1, Gcc2, Gnptab, Gper1, Grip1, Gsk3b, Hcls1, Kcnq3, Kif5a, Kif5c, Kpna6, Lamp2, Lrrk2, Mapk1, Mapk14, Marcks, Mtch1, Napa, Napb, Ndel1, Ndp, Nsf, Nup153, Nup54, Nup85, Nxt1, Pom121, Ppp2ca, Prr5l, Ptgs2, Pttg1ip, RGD1310429, Ra…
