# Supplementary material for: Brain region-resolved pharmacodynamics of a human SNCA 3′UTR-targeting antisense oligonucleotide in BAC-hSNCA rats
Source: Research Square preprint supplement (doi:10.21203/rs.3.rs-8521036/v1), 2026-01-21
Supplement: Supplementary file 3 [file facc1e3e95a2a9e46eb84875.xlsx]

## Sheet: Table title
Data S3. Results of Gene Set Enrichment Analysis (GSEA) on the mouse Gene Ontology - Biological Process gene set collection.

## Sheet: Olfactory Bulb
		Enriched in ASO samples											Enriched in Control samples
		GS	SIZE	ES	NES	NOM p-val	FDR q-val	FWER p-val	RANK AT MAX	LEADING EDGE			GS	SIZE	ES	NES	NOM p-val	FDR q-val	FWER p-val	RANK AT MAX	LEADING EDGE
	1	GOBP_EPOXYGENASE_P450_PATHWAY	21	0.68	2.69	0	0.001	0.001	1822	tags=48%, list=10%, signal=53%		1	GOBP_REGULATION_OF_LACTATION	21	-0.75	-1.93	0	0.003	0.013	87	tags=5%, list=0%, signal=5%
	2	GOBP_KERATINIZATION	48	0.48	2.11	0	0.02	0.044	956	tags=21%, list=5%, signal=22%		2	GOBP_NITRIC_OXIDE_SYNTHASE_BIOSYNTHETIC_PROCESS	26	-0.65	-1.72	0	0.148	0.574	4949	tags=62%, list=26%, signal=83%
	3	GOBP_RETROTRANSPOSON_SILENCING_BY_HETEROCHROMATIN_FORMATION	15	0.58	1.96	0.011	0.045	0.136	341	tags=27%, list=2%, signal=27%		3	GOBP_INNERVATION	32	-0.62	-1.7	0	0.169	0.682	3131	tags=50%, list=16%, signal=60%
	4	GOBP_MITOCHONDRIAL_ELECTRON_TRANSPORT_CYTOCHROME_C_TO_OXYGEN	17	0.5	1.91	0	0.046	0.181	1725	tags=35%, list=9%, signal=39%		4	GOBP_GAMMA_AMINOBUTYRIC_ACID_SIGNALING_PATHWAY	31	-0.63	-1.7	0	0.151	0.691	2178	tags=42%, list=11%, signal=47%
	5	GOBP_INNATE_IMMUNE_RESPONSE_IN_MUCOSA	19	0.44	1.73	0	0.128	0.504	970	tags=16%, list=5%, signal=17%		5	GOBP_RENAL_SYSTEM_PROCESS_INVOLVED_IN_REGULATION_OF_SYSTEMIC_ARTERIAL_BLOOD_PRESSURE	27	-0.65	-1.7	0.002	0.142	0.713	2566	tags=41%, list=13%, signal=47%
	6	GOBP_TRANSLATION_AT_SYNAPSE	43	0.34	1.66	0	0.165	0.664	11769	tags=98%, list=61%, signal=252%		6	GOBP_ADRENERGIC_RECEPTOR_SIGNALING_PATHWAY	31	-0.62	-1.69	0.002	0.156	0.787	1340	tags=39%, list=7%, signal=42%
	7	GOBP_XENOBIOTIC_METABOLIC_PROCESS	89	0.31	1.62	0	0.189	0.774	1695	tags=25%, list=9%, signal=27%		7	GOBP_LEUKOCYTE_TETHERING_OR_ROLLING	36	-0.61	-1.68	0	0.15	0.807	2216	tags=39%, list=12%, signal=44%
	8	GOBP_REVERSE_CHOLESTEROL_TRANSPORT	15	0.43	1.61	0.026	0.171	0.789	2138	tags=47%, list=11%, signal=52%		8	GOBP_NEGATIVE_REGULATION_OF_CARDIAC_MUSCLE_CELL_PROLIFERATION	16	-0.68	-1.68	0	0.139	0.815	4250	tags=69%, list=22%, signal=88%
	9	GOBP_PIRNA_PROCESSING	23	0.39	1.55	0	0.227	0.912	613	tags=22%, list=3%, signal=22%		9	GOBP_ESTABLISHMENT_OF_BLOOD_BRAIN_BARRIER	18	-0.67	-1.68	0.002	0.133	0.828	5478	tags=78%, list=29%, signal=109%
	10	GOBP_ARACHIDONIC_ACID_SECRETION	34	0.34	1.54	0	0.217	0.92	718	tags=24%, list=4%, signal=24%		10	GOBP_RESPONSE_TO_GONADOTROPIN	19	-0.67	-1.67	0.001	0.149	0.869	2473	tags=47%, list=13%, signal=54%
	11	GOBP_RIBOSOMAL_SMALL_SUBUNIT_ASSEMBLY	18	0.42	1.49	0.069	0.269	0.96	1367	tags=28%, list=7%, signal=30%		11	GOBP_PHOTORECEPTOR_CELL_MAINTENANCE	44	-0.59	-1.65	0	0.18	0.927	2888	tags=48%, list=15%, signal=56%
	12	GOBP_NEGATIVE_REGULATION_OF_INTERLEUKIN_10_PRODUCTION	20	0.37	1.48	0.067	0.267	0.969	818	tags=35%, list=4%, signal=37%		12	GOBP_PERICARDIUM_DEVELOPMENT	28	-0.62	-1.65	0	0.17	0.93	2733	tags=43%, list=14%, signal=50%
	13	GOBP_ANTIMICROBIAL_HUMORAL_IMMUNE_RESPONSE_MEDIATED_BY_ANTIMICROBIAL_PEPTIDE	83	0.23	1.46	0	0.274	0.977	1291	tags=19%, list=7%, signal=21%		13	GOBP_OVULATION	21	-0.64	-1.65	0.002	0.168	0.942	1791	tags=43%, list=9%, signal=47%
	14	GOBP_SPERM_DNA_CONDENSATION	16	0.39	1.46	0.053	0.257	0.98	1220	tags=25%, list=6%, signal=27%		14	GOBP_REGULATION_OF_SYSTEMIC_ARTERIAL_BLOOD_PRESSURE_BY_CIRCULATORY_RENIN_ANGIOTENSIN	17	-0.67	-1.64	0.002	0.176	0.968	2421	tags=47%, list=13%, signal=54%
	15	GOBP_AMIDE_CATABOLIC_PROCESS	22	0.35	1.44	0.04	0.261	0.989	1638	tags=32%, list=9%, signal=35%		15	GOBP_GASTRULATION_WITH_MOUTH_FORMING_SECOND	36	-0.6	-1.64	0	0.172	0.969	3424	tags=47%, list=18%, signal=57%
	16	GOBP_G_PROTEIN_COUPLED_RECEPTOR_INTERNALIZATION	19	0.38	1.43	0.018	0.258	0.991	1468	tags=26%, list=8%, signal=28%		16	GOBP_PERK_MEDIATED_UNFOLDED_PROTEIN_RESPONSE	15	-0.68	-1.63	0.004	0.208	0.985	3143	tags=47%, list=16%, signal=56%
	17	GOBP_ANTIBACTERIAL_HUMORAL_RESPONSE	61	0.27	1.41	0.1	0.286	0.993	1520	tags=26%, list=8%, signal=28%		17	GOBP_REGULATION_OF_CATECHOLAMINE_METABOLIC_PROCESS	25	-0.62	-1.62	0.001	0.215	0.992	3788	tags=52%, list=20%, signal=65%
	18	GOBP_INTERMEDIATE_FILAMENT_ORGANIZATION	65	0.26	1.4	0	0.271	0.993	1071	tags=17%, list=6%, signal=18%		18	GOBP_PRESYNAPTIC_MODULATION_OF_CHEMICAL_SYNAPTIC_TRANSMISSION	61	-0.55	-1.62	0	0.224	0.993	3726	tags=46%, list=19%, signal=57%
	19	GOBP_INTERLEUKIN_5_PRODUCTION	21	0.35	1.38	0.067	0.303	0.998	1470	tags=33%, list=8%, signal=36%		19	GOBP_POSITIVE_REGULATION_OF_NITRIC_OXIDE_SYNTHASE_BIOSYNTHETIC_PROCESS	20	-0.64	-1.61	0.003	0.22	0.993	4949	tags=65%, list=26%, signal=88%
	20	GOBP_ORGAN_OR_TISSUE_SPECIFIC_IMMUNE_RESPONSE	36	0.32	1.36	0.045	0.32	0.998	970	tags=19%, list=5%, signal=20%		20	GOBP_CHLORIDE_TRANSMEMBRANE_TRANSPORT	66	-0.55	-1.61	0	0.218	0.993	3633	tags=39%, list=19%, signal=48%
	21	GOBP_PHOSPHOLIPID_EFFLUX	15	0.36	1.32	0.113	0.384	1	631	tags=20%, list=3%, signal=21%		21	GOBP_NEGATIVE_REGULATION_OF_SMOOTH_MUSCLE_CELL_APOPTOTIC_PROCESS	15	-0.66	-1.6	0.004	0.267	0.999	3351	tags=47%, list=17%, signal=57%
	22	GOBP_AEROBIC_ELECTRON_TRANSPORT_CHAIN	61	0.25	1.32	0	0.371	1	1911	tags=30%, list=10%, signal=33%		22	GOBP_EMBRYONIC_HEMOPOIESIS	32	-0.59	-1.59	0.002	0.268	0.999	4733	tags=50%, list=25%, signal=66%
	23	GOBP_REGULATION_OF_RESPONSE_TO_FOOD	22	0.33	1.3	0.114	0.399	1	1010	tags=27%, list=5%, signal=29%		23	GOBP_SYNAPTIC_TRANSMISSION_GABAERGIC	70	-0.54	-1.59	0	0.269	0.999	2967	tags=40%, list=15%, signal=47%
	24	GOBP_RESPONSE_TO_PHEROMONE	42	0.27	1.29	0.077	0.411	1	1588	tags=14%, list=8%, signal=16%		24	GOBP_REGULATION_OF_LONG_TERM_NEURONAL_SYNAPTIC_PLASTICITY	36	-0.58	-1.59	0.001	0.268	0.999	4848	tags=56%, list=25%, signal=74%
	25	GOBP_PROTON_MOTIVE_FORCE_DRIVEN_ATP_SYNTHESIS	67	0.27	1.27	0	0.426	1	2315	tags=37%, list=12%, signal=42%		25	GOBP_GLIAL_CELL_MIGRATION	71	-0.54	-1.59	0	0.261	0.999	7043	tags=69%, list=37%, signal=109%
	26	GOBP_REGULATION_OF_BILE_ACID_METABOLIC_PROCESS	15	0.37	1.26	0.162	0.435	1	1866	tags=40%, list=10%, signal=44%		26	GOBP_GLOMERULAR_EPITHELIUM_DEVELOPMENT	19	-0.63	-1.58	0.002	0.267	0.999	1396	tags=32%, list=7%, signal=34%
	27	GOBP_REGULATION_OF_HETEROTYPIC_CELL_CELL_ADHESION	24	0.32	1.24	0.171	0.476	1	1533	tags=33%, list=8%, signal=36%		27	GOBP_POSITIVE_REGULATION_OF_CYTOKINE_PRODUCTION_INVOLVED_IN_INFLAMMATORY_RESPONSE	29	-0.6	-1.58	0.002	0.259	0.999	5238	tags=48%, list=27%, signal=66%
	28	GOBP_NEGATIVE_REGULATION_OF_CYTOKINE_PRODUCTION_INVOLVED_IN_IMMUNE_RESPONSE	33	0.28	1.23	0.147	0.476	1	818	tags=18%, list=4%, signal=19%		28	GOBP_POSITIVE_REGULATION_OF_RESPONSE_TO_CYTOKINE_STIMULUS	62	-0.54	-1.58	0	0.252	0.999	5590	tags=58%, list=29%, signal=82%
	29	GOBP_MESODERMAL_CELL_FATE_COMMITMENT	17	0.34	1.22	0.203	0.5	1	671	tags=18%, list=3%, signal=18%		29	GOBP_REGULATION_OF_VIRAL_INDUCED_CYTOPLASMIC_PATTERN_RECOGNITION_RECEPTOR_SIGNALING_PATHWAY	86	-0.53	-1.58	0	0.247	0.999	5886	tags=56%, list=31%, signal=80%
	30	GOBP_NEGATIVE_REGULATION_OF_T_CELL_RECEPTOR_SIGNALING_PATHWAY	22	0.29	1.21	0.196	0.512	1	907	tags=14%, list=5%, signal=14%		30	GOBP_REGULATION_OF_BLOOD_VESSEL_ENDOTHELIAL_CELL_PROLIFERATION_INVOLVED_IN_SPROUTING_ANGIOGENESIS	17	-0.64	-1.58	0.007	0.246	0.999	3366	tags=47%, list=18%, signal=57%
	31	GOBP_NEGATIVE_REGULATION_OF_MYOTUBE_DIFFERENTIATION	17	0.32	1.2	0.141	0.504	1	2366	tags=41%, list=12%, signal=47%		31	GOBP_FIBROBLAST_ACTIVATION	21	-0.62	-1.57	0.002	0.259	0.999	754	tags=29%, list=4%, signal=30%
	32	GOBP_ARACHIDONIC_ACID_METABOLIC_PROCESS	56	0.25	1.18	0	0.568	1	610	tags=11%, list=3%, signal=11%		32	GOBP_POSITIVE_REGULATION_OF_MEIOTIC_CELL_CYCLE	32	-0.58	-1.57	0.003	0.255	0.999	3341	tags=41%, list=17%, signal=49%
	33	GOBP_NEGATIVE_REGULATION_OF_B_CELL_APOPTOTIC_PROCESS	21	0.31	1.18	0.208	0.551	1	1410	tags=19%, list=7%, signal=21%		33	GOBP_POSITIVE_REGULATION_OF_VASCULAR_ASSOCIATED_SMOOTH_MUSCLE_CELL_MIGRATION	21	-0.62	-1.57	0.01	0.271	1	4976	tags=62%, list=26%, signal=84%
	34	GOBP_POSITIVE_REGULATION_OF_CIRCADIAN_RHYTHM	27	0.27	1.17	0.156	0.544	1	792	tags=19%, list=4%, signal=19%		34	GOBP_CHONDROITIN_SULFATE_METABOLIC_PROCESS	26	-0.59	-1.56	0.008	0.273	1	4545	tags=62%, list=24%, signal=81%
	35	GOBP_FOREBRAIN_REGIONALIZATION	27	0.27	1.16	0.174	0.581	1	842	tags=15%, list=4%, signal=15%		35	GOBP_SMOOTH_MUSCLE_CELL_APOPTOTIC_PROCESS	32	-0.57	-1.56	0.002	0.273	1	3537	tags=38%, list=18%, signal=46%
	36	GOBP_ATP_SYNTHESIS_COUPLED_ELECTRON_TRANSPORT	75	0.22	1.15	0	0.572	1	2305	tags=32%, list=12%, signal=36%		36	GOBP_CHONDROITIN_SULFATE_PROTEOGLYCAN_METABOLIC_PROCESS	33	-0.57	-1.56	0.005	0.271	1	6261	tags=70%, list=33%, signal=103%
	37	GOBP_POSITIVE_REGULATION_OF_MONOCYTE_CHEMOTACTIC_PROTEIN_1_PRODUCTION	18	0.31	1.15	0.192	0.561	1	2360	tags=44%, list=12%, signal=51%		37	GOBP_ER_NUCLEUS_SIGNALING_PATHWAY	43	-0.56	-1.55	0.001	0.297	1	4962	tags=53%, list=26%, signal=72%
	38	GOBP_NEGATIVE_REGULATION_OF_ACTIVATED_T_CELL_PROLIFERATION	15	0.33	1.14	0.181	0.572	1	495	tags=20%, list=3%, signal=21%		38	GOBP_HEPATIC_STELLATE_CELL_ACTIVATION	15	-0.65	-1.55	0.007	0.296	1	4919	tags=60%, list=26%, signal=81%
	39	GOBP_AXONEMAL_DYNEIN_COMPLEX_ASSEMBLY	35	0.25	1.14	0.227	0.564	1	2205	tags=34%, list=11%, signal=39%		39	GOBP_CENTRAL_NERVOUS_SYSTEM_PROJECTION_NEURON_AXONOGENESIS	31	-0.58	-1.55	0.004	0.294	1	5609	tags=61%, list=29%, signal=86%
	40	GOBP_TRANSPOSITION	32	0.28	1.14	0.185	0.559	1	341	tags=13%, list=2%, signal=13%		40	GOBP_GLYCEROL_METABOLIC_PROCESS	21	-0.6	-1.55	0.007	0.291	1	4578	tags=38%, list=24%, signal=50%
	41	GOBP_MESODERMAL_CELL_DIFFERENTIATION	24	0.29	1.14	0.222	0.551	1	671	tags=17%, list=3%, signal=17%		41	GOBP_BASEMENT_MEMBRANE_ORGANIZATION	40	-0.55	-1.55	0.001	0.288	1	7079	tags=70%, list=37%, signal=111%
	42	GOBP_MEDIUM_CHAIN_FATTY_ACID_METABOLIC_PROCESS	16	0.32	1.13	0.232	0.565	1	1381	tags=25%, list=7%, signal=27%		42	GOBP_POSITIVE_REGULATION_OF_PATTERN_RECOGNITION_RECEPTOR_SIGNALING_PATHWAY	65	-0.53	-1.55	0.001	0.286	1	5282	tags=52%, list=28%, signal=72%
	43	GOBP_CELL_CYCLE_PHASE	26	0.28	1.12	0.256	0.559	1	1826	tags=31%, list=10%, signal=34%		43	GOBP_GLYCEROL_ETHER_METABOLIC_PROCESS	20	-0.62	-1.55	0.006	0.283	1	3853	tags=50%, list=20%, signal=63%
	44	GOBP_OUTER_DYNEIN_ARM_ASSEMBLY	22	0.28	1.12	0.154	0.555	1	2205	tags=32%, list=11%, signal=36%		44	GOBP_NEGATIVE_REGULATION_OF_PROTEIN_IMPORT_INTO_NUCLEUS	18	-0.62	-1.55	0.014	0.281	1	5282	tags=67%, list=28%, signal=92%
	45	GOBP_NEGATIVE_REGULATION_OF_DIGESTIVE_SYSTEM_PROCESS	18	0.29	1.12	0.277	0.547	1	326	tags=11%, list=2%, signal=11%		45	GOBP_BRANCHING_INVOLVED_IN_SALIVARY_GLAND_MORPHOGENESIS	28	-0.58	-1.55	0.005	0.278	1	5197	tags=57%, list=27%, signal=78%
	46	GOBP_BILE_ACID_AND_BILE_SALT_TRANSPORT	27	0.27	1.12	0.303	0.542	1	1178	tags=19%, list=6%, signal=20%		46	GOBP_ETHER_METABOLIC_PROCESS	24	-0.58	-1.55	0.009	0.274	1	2796	tags=42%, list=15%, signal=49%
	47	GOBP_SEQUESTERING_OF_METAL_ION	15	0.32	1.11	0.321	0.562	1	1458	tags=20%, list=8%, signal=22%		47	GOBP_RENAL_SYSTEM_PROCESS_INVOLVED_IN_REGULATION_OF_BLOOD_VOLUME	16	-0.63	-1.54	0.011	0.289	1	3765	tags=50%, list=20%, signal=62%
	48	GOBP_SKELETAL_MUSCLE_CONTRACTION	41	0.24	1.11	0.143	0.551	1	793	tags=17%, list=4%, signal=18%		48	GOBP_SALIVARY_GLAND_DEVELOPMENT	40	-0.55	-1.54	0.006	0.285	1	7281	tags=68%, list=38%, signal=109%
	49	GOBP_BENZENE_CONTAINING_COMPOUND_METABOLIC_PROCESS	20	0.29	1.1	0.273	0.556	1	915	tags=20%, list=5%, signal=21%		49	GOBP_POSITIVE_REGULATION_OF_BMP_SIGNALING_PATHWAY	40	-0.55	-1.54	0.005	0.28	1	4137	tags=48%, list=22%, signal=60%
	50	GOBP_HYDROGEN_PEROXIDE_CATABOLIC_PROCESS	25	0.27	1.09	0.359	0.588	1	2131	tags=36%, list=11%, signal=40%		50	GOBP_MAST_CELL_MIGRATION	17	-0.62	-1.54	0.011	0.276	1	1940	tags=35%, list=10%, signal=39%
	51	GOBP_CELLULAR_RESPONSE_TO_COLD	17	0.31	1.08	0.274	0.597	1	1576	tags=35%, list=8%, signal=38%		51	GOBP_RESPONSE_TO_AMYLOID_BETA	42	-0.55	-1.54	0.001	0.275	1	5347	tags=55%, list=28%, signal=76%
	52	GOBP_RESPONSE_TO_FOOD	38	0.24	1.07	0.278	0.61	1	1079	tags=18%, list=6%, signal=19%		52	GOBP_REGULATION_OF_DEFENSE_RESPONSE_TO_BACTERIUM	20	-0.6	-1.54	0.011	0.272	1	4064	tags=50%, list=21%, signal=63%
	53	GOBP_REGULATION_OF_CHOLESTEROL_STORAGE	18	0.28	1.07	0.333	0.61	1	1381	tags=33%, list=7%, signal=36%		53	GOBP_POSITIVE_REGULATION_OF_NEUROBLAST_PROLIFERATION	43	-0.55	-1.53	0.001	0.274	1	4427	tags=49%, list=23%, signal=63%
	54	GOBP_POSITIVE_REGULATION_OF_DIGESTIVE_SYSTEM_PROCESS	17	0.3	1.03	0.308	0.693	1	2215	tags=35%, list=12%, signal=40%		54	GOBP_CALCIUM_DEPENDENT_CELL_CELL_ADHESION_VIA_PLASMA_MEMBRANE_CELL_ADHESION_MOLECULES	36	-0.55	-1.53	0.003	0.276	1	6756	tags=72%, list=35%, signal=111%
	55	GOBP_NEGATIVE_REGULATION_OF_PRODUCTION_OF_MOLECULAR_MEDIATOR_OF_IMMUNE_RESPONSE	46	0.2	1	0.545	0.812	1	1322	tags=17%, list=7%, signal=19%		55	GOBP_TOLL_LIKE_RECEPTOR_3_SIGNALING_PATHWAY	28	-0.57	-1.53	0.007	0.275	1	5560	tags=64%, list=29%, signal=90%
	56	GOBP_CD8_POSITIVE_ALPHA_BETA_T_CELL_DIFFERENTIATION	20	0.25	0.99	0.418	0.801	1	967	tags=20%, list=5%, signal=21%		56	GOBP_ADHERENS_JUNCTION_ORGANIZATION	57	-0.53	-1.53	0	0.275	1	6444	tags=63%, list=34%, signal=95%
	57	GOBP_TRNA_5_END_PROCESSING	15	0.27	0.99	0.446	0.788	1	9429	tags=93%, list=49%, signal=183%		57	GOBP_INORGANIC_ANION_TRANSMEMBRANE_TRANSPORT	89	-0.51	-1.53	0	0.281	1	3633	tags=36%, list=19%, signal=44%
	58	GOBP_NEGATIVE_REGULATION_OF_ANTIGEN_RECEPTOR_MEDIATED_SIGNALING_PATHWAY	28	0.23	0.99	0.464	0.8	1	221	tags=7%, list=1%, signal=7%		58	GOBP_PROTEIN_K48_LINKED_DEUBIQUITINATION	29	-0.57	-1.53	0.006	0.28	1	7376	tags=83%, list=38%, signal=134%
	59	GOBP_ICOSANOID_BIOSYNTHETIC_PROCESS	44	0.24	0.97	0.545	0.826	1	831	tags=18%, list=4%, signal=19%		59	GOBP_MONOATOMIC_ANION_TRANSMEMBRANE_TRANSPORT	90	-0.51	-1.53	0	0.278	1	3633	tags=36%, list=19%, signal=44%
	60	GOBP_POSITIVE_REGULATION_OF_CHOLESTEROL_METABOLIC_PROCESS	16	0.28	0.97	0.5	0.815	1	1381	tags=25%, list=7%, signal=27%		60	GOBP_EXOCRINE_SYSTEM_DEVELOPMENT	53	-0.53	-1.53	0.001	0.276	1	7523	tags=64%, list=39%, signal=105%
	61	GOBP_REGULATORY_T_CELL_DIFFERENTIATION	40	0.23	0.97	0.577	0.803	1	818	tags=13%, list=4%, signal=13%		61	GOBP_POST_EMBRYONIC_ANIMAL_ORGAN_DEVELOPMENT	20	-0.6	-1.53	0.009	0.272	1	3222	tags=45%, list=17%, signal=54%
	62	GOBP_LONG_CHAIN_FATTY_ACID_TRANSPORT	66	0.2	0.97	0.667	0.793	1	718	tags=14%, list=4%, signal=14%		62	GOBP_POSITIVE_REGULATION_OF_RESPONSE_TO_ENDOPLASMIC_RETICULUM_STRESS	35	-0.56	-1.52	0.01	0.271	1	5269	tags=54%, list=27%, signal=75%
	63	GOBP_DENDRITIC_CELL_CHEMOTAXIS	19	0.24	0.97	0.556	0.786	1	462	tags=11%, list=2%, signal=11%		63	GOBP_NEURON_PROJECTION_ARBORIZATION	32	-0.56	-1.52	0.005	0.282	1	5152	tags=56%, list=27%, signal=77%
	64	GOBP_REGULATION_OF_RESPONSE_TO_EXTRACELLULAR_STIMULUS	36	0.22	0.96	0.529	0.792	1	1051	tags=19%, list=5%, signal=21%		64	GOBP_BRANCHING_INVOLVED_IN_BLOOD_VESSEL_MORPHOGENESIS	45	-0.54	-1.52	0.002	0.281	1	6646	tags=60%, list=35%, signal=92%
	65	GOBP_ACUTE_PHASE_RESPONSE	34	0.23	0.96	0.538	0.787	1	713	tags=15%, list=4%, signal=15%		65	GOBP_REGULATION_OF_SYNAPTIC_TRANSMISSION_CHOLINERGIC	15	-0.63	-1.52	0.014	0.291	1	2967	tags=40%, list=15%, signal=47%
	66	GOBP_PROGESTERONE_METABOLIC_PROCESS	17	0.26	0.94	0.508	0.826	1	14262	tags=100%, list=74%, signal=390%		66	GOBP_NUCLEOPHAGY	19	-0.61	-1.52	0.007	0.288	1	4048	tags=58%, list=21%, signal=73%
	67	GOBP_INTERMEDIATE_FILAMENT_BASED_PROCESS	86	0.19	0.9	1	0.934	1	1071	tags=15%, list=6%, signal=16%		67	GOBP_ENDOPLASMIC_RETICULUM_TUBULAR_NETWORK_ORGANIZATION	21	-0.59	-1.51	0.011	0.29	1	5722	tags=67%, list=30%, signal=95%
	68	GOBP_PEPTIDE_CROSS_LINKING	26	0.22	0.9	0.548	0.921	1	992	tags=19%, list=5%, signal=20%		68	GOBP_ENDOLYSOSOMAL_TOLL_LIKE_RECEPTOR_SIGNALING_PATHWAY	47	-0.53	-1.51	0.001	0.287	1	5657	tags=55%, list=29%, signal=78%
	69	GOBP_REGULATION_OF_MAST_CELL_ACTIVATION	57	0.18	0.9	0.8	0.911	1	1606	tags=18%, list=8%, signal=19%		69	GOBP_COCHLEA_DEVELOPMENT	50	-0.53	-1.51	0.002	0.292	1	4137	tags=42%, list=22%, signal=53%
	70	GOBP_POSITIVE_REGULATION_OF_ICOSANOID_SECRETION	20	0.24	0.9	0.625	0.903	1	2091	tags=35%, list=11%, signal=39%		70	GOBP_REGULATION_OF_GLIAL_CELL_MIGRATION	26	-0.56	-1.51	0.014	0.291	1	6988	tags=73%, list=36%, signal=115%
	71	GOBP_POSITIVE_REGULATION_OF_EPIDERMIS_DEVELOPMENT	26	0.23	0.9	0.682	0.896	1	1051	tags=19%, list=5%, signal=20%		71	GOBP_DOPAMINE_SECRETION	47	-0.54	-1.51	0.002	0.288	1	3191	tags=40%, list=17%, signal=48%
	72	GOBP_INNER_DYNEIN_ARM_ASSEMBLY	15	0.25	0.89	0.58	0.905	1	1248	tags=27%, list=7%, signal=29%		72	GOBP_CATECHOL_CONTAINING_COMPOUND_METABOLIC_PROCESS	63	-0.51	-1.51	0	0.285	1	5051	tags=48%, list=26%, signal=64%
	73	GOBP_PROTEIN_ACTIVATION_CASCADE	20	0.23	0.88	0.688	0.911	1	589	tags=15%, list=3%, signal=15%		73	GOBP_RETINA_HOMEOSTASIS	57	-0.52	-1.51	0.002	0.293	1	2927	tags=40%, list=15%, signal=47%
	74	GOBP_THYROID_GLAND_DEVELOPMENT	34	0.21	0.88	0.759	0.902	1	1351	tags=15%, list=7%, signal=16%		74	GOBP_L_GLUTAMATE_TRANSMEMBRANE_TRANSPORT	28	-0.57	-1.51	0.013	0.292	1	7850	tags=82%, list=41%, signal=139%
	75	GOBP_NEGATIVE_REGULATION_OF_ANDROGEN_RECEPTOR_SIGNALING_PATHWAY	17	0.25	0.88	0.623	0.895	1	14431	tags=100%, list=75%, signal=404%		75	GOBP_REGULATION_OF_INTRINSIC_APOPTOTIC_SIGNALING_PATHWAY_BY_P53_CLASS_MEDIATOR	36	-0.55	-1.51	0.002	0.289	1	3426	tags=39%, list=18%, signal=47%
	76	GOBP_POSITIVE_REGULATION_OF_REGULATORY_T_CELL_DIFFERENTIATION	20	0.23	0.87	0.706	0.91	1	818	tags=10%, list=4%, signal=10%		76	GOBP_ESTABLISHMENT_OF_ENDOTHELIAL_BARRIER	49	-0.53	-1.51	0.002	0.287	1	6078	tags=63%, list=32%, signal=92%
	77	GOBP_SPERM_AXONEME_ASSEMBLY	31	0.21	0.86	0.735	0.918	1	832	tags=13%, list=4%, signal=13%		77	GOBP_REGULATION_OF_PRESYNAPSE_ORGANIZATION	42	-0.54	-1.51	0.007	0.284	1	5802	tags=67%, list=30%, signal=95%
	78	GOBP_GRANULOCYTE_MACROPHAGE_COLONY_STIMULATING_FACTOR_PRODUCTION	16	0.24	0.86	0.641	0.918	1	1897	tags=31%, list=10%, signal=35%		78	GOBP_CHONDROITIN_SULFATE_PROTEOGLYCAN_BIOSYNTHETIC_PROCESS	22	-0.59	-1.51	0.013	0.282	1	6261	tags=77%, list=33%, signal=115%
	79	GOBP_POSITIVE_REGULATION_OF_EPIDERMAL_CELL_DIFFERENTIATION	22	0.21	0.86	0.729	0.909	1	1051	tags=18%, list=5%, signal=19%		79	GOBP_PEROXISOMAL_TRANSPORT	24	-0.58	-1.5	0.008	0.288	1	6445	tags=71%, list=34%, signal=107%
	80	GOBP_POSITIVE_REGULATION_OF_HISTONE_METHYLATION	17	0.22	0.84	0.781	0.932	1	9	tags=6%, list=0%, signal=6%		80	GOBP_POSITIVE_REGULATION_OF_CELL_MIGRATION_INVOLVED_IN_SPROUTING_ANGIOGENESIS	21	-0.59	-1.5	0.015	0.29	1	3366	tags=48%, list=18%, signal=58%
	81	GOBP_RIBOSOMAL_LARGE_SUBUNIT_ASSEMBLY	25	0.2	0.81	0.872	0.986	1	723	tags=12%, list=4%, signal=12%		81	GOBP_POSITIVE_REGULATION_OF_PROTEIN_AUTOPHOSPHORYLATION	26	-0.57	-1.5	0.009	0.292	1	4373	tags=54%, list=23%, signal=70%
	82	GOBP_REGULATION_OF_HISTONE_METHYLATION	20	0.2	0.76	0.94	1	1	9	tags=5%, list=0%, signal=5%		82	GOBP_CHONDROITIN_SULFATE_BIOSYNTHETIC_PROCESS	15	-0.63	-1.5	0.022	0.292	1	6261	tags=87%, list=33%, signal=129%
	83	GOBP_NEGATIVE_REGULATION_OF_CIRCADIAN_RHYTHM	15	0.22	0.76	0.869	1	1	21	tags=7%, list=0%, signal=7%		83	GOBP_POSITIVE_REGULATION_OF_RESPONSE_TO_TUMOR_CELL	18	-0.6	-1.5	0.016	0.289	1	2681	tags=39%, list=14%, signal=45%
	84	GOBP_NEGATIVE_REGULATION_OF_CALCINEURIN_MEDIATED_SIGNALING	15	0.23	0.76	0.807	1	1	1619	tags=20%, list=8%, signal=22%		84	GOBP_AUDITORY_RECEPTOR_CELL_DEVELOPMENT	36	-0.54	-1.5	0.004	0.291	1	5229	tags=47%, list=27%, signal=65%
	85	GOBP_REGULATION_OF_RESPIRATORY_GASEOUS_EXCHANGE	26	0.18	0.75	0.969	1	1	1029	tags=15%, list=5%, signal=16%		85	GOBP_REGULATION_OF_CLATHRIN_DEPENDENT_ENDOCYTOSIS	20	-0.59	-1.5	0.023	0.288	1	3654	tags=50%, list=19%, signal=62%
	86	GOBP_REGULATION_OF_LIPOPROTEIN_PARTICLE_CLEARANCE	21	0.19	0.75	0.917	1	1	1522	tags=19%, list=8%, signal=21%		86	GOBP_NEGATIVE_REGULATION_OF_CELL_MATRIX_ADHESION	36	-0.54	-1.5	0.007	0.285	1	4709	tags=50%, list=25%, signal=66%
	87	GOBP_CATECHOLAMINE_UPTAKE	18	0.2	0.74	0.924	1	1	1083	tags=22%, list=6%, signal=24%		87	GOBP_VENTRICULAR_SEPTUM_MORPHOGENESIS	51	-0.52	-1.5	0.003	0.284	1	6722	tags=65%, list=35%, signal=99%
	88	GOBP_POSITIVE_REGULATION_OF_LYMPHOCYTE_CHEMOTAXIS	18	0.2	0.74	0.867	1	1	914	tags=17%, list=5%, signal=17%		88	GOBP_POSITIVE_REGULATION_OF_TYPE_I_INTERFERON_MEDIATED_SIGNALING_PATHWAY	20	-0.59	-1.5	0.015	0.282	1	6341	tags=60%, list=33%, signal=90%
	89	GOBP_REGULATION_OF_SENSORY_PERCEPTION	21	0.19	0.73	1	1	1	447	tags=10%, list=2%, signal=10%		89	GOBP_NEURON_REMODELING	18	-0.6	-1.5	0.02	0.281	1	3883	tags=50%, list=20%, signal=63%
	90	GOBP_SARCOMERE_ORGANIZATION	49	0.16	0.71	1	1	1	1890	tags=22%, list=10%, signal=25%		90	GOBP_BASIC_AMINO_ACID_TRANSPORT	17	-0.6	-1.49	0.024	0.282	1	6395	tags=65%, list=33%, signal=97%
	91	GOBP_DENDRITIC_CELL_MIGRATION	26	0.16	0.7	0.927	1	1	462	tags=8%, list=2%, signal=8%		91	GOBP_CYTOSOLIC_PATTERN_RECOGNITION_RECEPTOR_SIGNALING_PATHWAY	138	-0.49	-1.49	0	0.28	1	6005	tags=52%, list=31%, signal=75%
	92	GOBP_POSITIVE_REGULATION_OF_FATTY_ACID_TRANSPORT	25	0.17	0.69	0.925	1	1	2091	tags=28%, list=11%, signal=31%		92	GOBP_ENDOTHELIAL_CELL_DEVELOPMENT	70	-0.5	-1.49	0	0.283	1	6457	tags=59%, list=34%, signal=88%
	93	GOBP_LOW_DENSITY_LIPOPROTEIN_PARTICLE_CLEARANCE	24	0.16	0.67	0.977	1	1	1256	tags=13%, list=7%, signal=13%		93	GOBP_PROTEIN_TARGETING_TO_PEROXISOME	20	-0.6	-1.49	0.014	0.28	1	6445	tags=75%, list=34%, signal=113%
	94	GOBP_PLASMA_LIPOPROTEIN_PARTICLE_CLEARANCE	37	0.15	0.67	1	1	1	1522	tags=16%, list=8%, signal=18%		94	GOBP_I_KAPPAB_PHOSPHORYLATION	18	-0.6	-1.49	0.009	0.284	1	5577	tags=56%, list=29%, signal=78%
	95	GOBP_NEGATIVE_REGULATION_OF_SODIUM_ION_TRANSMEMBRANE_TRANSPORT	16	0.19	0.67	0.971	0.997	1	15559	tags=100%, list=81%, signal=529%		95	GOBP_REGULATION_OF_CYTOPLASMIC_TRANSLATION	30	-0.56	-1.49	0.01	0.282	1	7270	tags=77%, list=38%, signal=123%
	96	GOBP_GLYCOLYTIC_PROCESS_THROUGH_GLUCOSE_6_PHOSPHATE	19	0.16	0.59	0.976	1	1	16186	tags=100%, list=84%, signal=640%		96	GOBP_ANTIGEN_PROCESSING_AND_PRESENTATION_OF_PEPTIDE_ANTIGEN	48	-0.52	-1.49	0.003	0.281	1	5334	tags=56%, list=28%, signal=78%
	97	GOBP_GLYCOLYTIC_PROCESS_THROUGH_FRUCTOSE_6_PHOSPHATE	25	0.13	0.54	1	1	1	1542	tags=16%, list=8%, signal=17%		97	GOBP_RESPONSE_TO_STEROL_DEPLETION	16	-0.62	-1.49	0.026	0.283	1	5623	tags=69%, list=29%, signal=97%
	98	GOBP_REGULATION_OF_LOW_DENSITY_LIPOPROTEIN_PARTICLE_CLEARANCE	15	0.16	0.52	1	0.999	1	1256	tags=13%, list=7%, signal=14%		98	GOBP_REGULATION_OF_PROTEIN_IMPORT_INTO_NUCLEUS	78	-0.5	-1.49	0	0.282	1	6714	tags=65%, list=35%, signal=100%
	99	GOBP_ANTIMICROBIAL_HUMORAL_RESPONSE	120	0.22	---	---	1	0	1520	tags=21%, list=8%, signal=22%		99	GOBP_REGULATION_OF_ENDOTHELIAL_CELL_DEVELOPMENT	18	-0.6	-1.49	0.021	0.281	1	5197	tags=67%, list=27%, signal=91%
	100	GOBP_DETECTION_OF_CHEMICAL_STIMULUS_INVOLVED_IN_SENSORY_PERCEPTION_OF_SMELL	419	0.34931	---	---	1	0	1999	tags=22%, list=10%, signal=24%		100	GOBP_DOPAMINE_METABOLIC_PROCESS	48	-0.53	-1.49	0.003	0.282	1	5051	tags=48%, list=26%, signal=65%
	101	GOBP_ELECTRON_TRANSPORT_CHAIN	106	0.132173	---	---	1	0	1911	tags=22%, list=10%, signal=24%		101	GOBP_CELLULAR_RESPONSE_TO_INTERFERON_ALPHA	16	-0.61	-1.49	0.019	0.284	1	2361	tags=44%, list=12%, signal=50%
	102	GOBP_OXIDATIVE_PHOSPHORYLATION	139	0.15439	---	---	1	0	1912	tags=24%, list=10%, signal=26%		102	GOBP_RESPONSE_TO_DIETARY_EXCESS	43	-0.53	-1.48	0.002	0.285	1	4396	tags=49%, list=23%, signal=63%
												103	GOBP_INTEGRATED_STRESS_RESPONSE_SIGNALING	22	-0.58	-1.48	0.018	0.29	1	3143	tags=41%, list=16%, signal=49%
												104	GOBP_REGULATION_OF_INFLAMMASOME_MEDIATED_SIGNALING_PATHWAY	36	-0.54	-1.48	0.009	0.291	1	5282	tags=53%, list=28%, signal=73%
												105	GOBP_MEMBRANE_BIOGENESIS	58	-0.51	-1.48	0.002	0.292	1	5885	tags=55%, list=31%, signal=79%
												106	GOBP_REGULATION_OF_CELLULAR_RESPONSE_TO_HYPOXIA	25	-0.56	-1.48	0.014	0.294	1	4295	tags=52%, list=22%, signal=67%
												107	GOBP_NEURONAL_STEM_CELL_POPULATION_MAINTENANCE	25	-0.55	-1.48	0.014	0.295	1	5609	tags=52%, list=29%, signal=73%
												108	GOBP_RELAXATION_OF_CARDIAC_MUSCLE	16	-0.6	-1.48	0.02	0.294	1	5984	tags=69%, list=31%, signal=100%
												109	GOBP_VASCULAR_ASSOCIATED_SMOOTH_MUSCLE_CELL_MIGRATION	39	-0.53	-1.48	0.004	0.291	1	4435	tags=49%, list=23%, signal=63%
												110	GOBP_POSITIVE_REGULATION_OF_LONG_TERM_SYNAPTIC_POTENTIATION	31	-0.55	-1.48	0.013	0.294	1	5979	tags=58%, list=31%, signal=84%
												111	GOBP_BLOOD_VESSEL_ENDOTHELIAL_CELL_PROLIFERATION_INVOLVED_IN_SPROUTING_ANGIOGENESIS	23	-0.57	-1.48	0.016	0.293	1	3539	tags=48%, list=18%, signal=59%
												112	GOBP_POSITIVE_REGULATION_OF_INFLAMMASOME_MEDIATED_SIGNALING_PATHWAY	21	-0.58	-1.48	0.018	0.29	1	5282	tags=62%, list=28%, signal=85%
												113	GOBP_POSITIVE_REGULATION_OF_MACROAUTOPHAGY	77	-0.5	-1.47	0.001	0.29	1	6367	tags=58%, list=33%, signal=87%
												114	GOBP_MUCUS_SECRETION	23	-0.57	-1.47	0.018	0.292	1	2918	tags=39%, list=15%, signal=46%
												115	GOBP_NUCLEOTIDE_SUGAR_BIOSYNTHETIC_PROCESS	17	-0.6	-1.47	0.029	0.295	1	3634	tags=53%, list=19%, signal=65%
												116	GOBP_MAGNESIUM_ION_TRANSPORT	17	-0.59	-1.47	0.031	0.293	1	7229	tags=88%, list=38%, signal=141%
												117	GOBP_NEGATIVE_REGULATION_OF_SIGNAL_TRANSDUCTION_BY_P53_CLASS_MEDIATOR	32	-0.54	-1.47	0.011	0.292	1	4748	tags=44%, list=25%, signal=58%
												118	GOBP_REGULATION_OF_CELL_SUBSTRATE_JUNCTION_ORGANIZATION	69	-0.5	-1.47	0	0.29	1	7242	tags=65%, list=38%, signal=104%
												119	GOBP_NEGATIVE_REGULATION_OF_SMOOTH_MUSCLE_CONTRACTION	19	-0.58	-1.47	0.018	0.289	1	6501	tags=74%, list=34%, signal=111%
												120	GOBP_MESENCHYMAL_CELL_APOPTOTIC_PROCESS	17	-0.59	-1.47	0.027	0.291	1	3343	tags=41%, list=17%, signal=50%
												121	GOBP_NEGATIVE_REGULATION_OF_STEROID_METABOLIC_PROCESS	27	-0.55	-1.47	0.014	0.29	1	3448	tags=44%, list=18%, signal=54%
												122	GOBP_GLIAL_CELL_APOPTOTIC_PROCESS	20	-0.58	-1.47	0.02	0.288	1	3946	tags=55%, list=21%, signal=69%
												123	GOBP_AORTA_MORPHOGENESIS	37	-0.53	-1.47	0.004	0.29	1	5566	tags=54%, list=29%, signal=76%
												124	GOBP_NEGATIVE_REGULATION_OF_DNA_REPLICATION	22	-0.58	-1.47	0.013	0.292	1	4360	tags=50%, list=23%, signal=65%
												125	GOBP_FOREBRAIN_NEURON_DEVELOPMENT	30	-0.54	-1.46	0.012	0.297	1	4976	tags=50%, list=26%, signal=67%
												126	GOBP_ACTIVATION_OF_JANUS_KINASE_ACTIVITY	15	-0.61	-1.46	0.013	0.299	1	2579	tags=33%, list=13%, signal=38%
												127	GOBP_NEGATIVE_REGULATION_OF_PEPTIDYL_SERINE_PHOSPHORYLATION	30	-0.54	-1.46	0.012	0.298	1	6164	tags=63%, list=32%, signal=93%
												128	GOBP_REGULATION_OF_AUTOPHAGOSOME_MATURATION	16	-0.6	-1.46	0.029	0.303	1	6011	tags=69%, list=31%, signal=100%
												129	GOBP_GONADOTROPIN_SECRETION	18	-0.58	-1.46	0.022	0.306	1	3773	tags=50%, list=20%, signal=62%
												130	GOBP_SEROTONIN_RECEPTOR_SIGNALING_PATHWAY	15	-0.6	-1.46	0.034	0.304	1	2926	tags=53%, list=15%, signal=63%
												131	GOBP_REGULATION_OF_EXTRACELLULAR_MATRIX_DISASSEMBLY	16	-0.6	-1.46	0.027	0.308	1	5188	tags=56%, list=27%, signal=77%
												132	GOBP_INNER_EAR_RECEPTOR_CELL_DEVELOPMENT	67	-0.5	-1.46	0	0.312	1	4152	tags=39%, list=22%, signal=49%
												133	GOBP_L_GLUTAMATE_IMPORT	39	-0.52	-1.46	0.013	0.312	1	7850	tags=77%, list=41%, signal=130%
												134	GOBP_REGULATION_OF_PROTEIN_AUTOPHOSPHORYLATION	45	-0.51	-1.46	0.01	0.311	1	4373	tags=47%, list=23%, signal=60%
												135	GOBP_CLATHRIN_DEPENDENT_ENDOCYTOSIS	48	-0.51	-1.46	0.006	0.31	1	3654	tags=44%, list=19%, signal=54%
												136	GOBP_PROTEIN_DESTABILIZATION	53	-0.51	-1.45	0.004	0.309	1	5921	tags=51%, list=31%, signal=73%
												137	GOBP_MICROGLIA_DIFFERENTIATION	15	-0.61	-1.45	0.036	0.308	1	6425	tags=93%, list=34%, signal=140%
												138	GOBP_ADENYLATE_CYCLASE_ACTIVATING_ADRENERGIC_RECEPTOR_SIGNALING_PATHWAY	25	-0.56	-1.45	0.014	0.307	1	1340	tags=32%, list=7%, signal=34%
												139	GOBP_LACTATION	52	-0.51	-1.45	0.003	0.306	1	6943	tags=38%, list=36%, signal=60%
												140	GOBP_ACTIVATION_OF_ADENYLATE_CYCLASE_ACTIVITY	21	-0.57	-1.45	0.02	0.305	1	3616	tags=52%, list=19%, signal=64%
												141	GOBP_PROTEIN_LOCALIZATION_TO_LYSOSOME	54	-0.5	-1.45	0.004	0.304	1	6378	tags=63%, list=33%, signal=94%
												142	GOBP_POSITIVE_REGULATION_OF_PROTEIN_CONTAINING_COMPLEX_DISASSEMBLY	36	-0.52	-1.45	0.008	0.302	1	6409	tags=64%, list=33%, signal=96%
												143	GOBP_NUCLEOTIDE_BINDING_OLIGOMERIZATION_DOMAIN_CONTAINING_2_SIGNALING_PATHWAY	18	-0.59	-1.45	0.021	0.303	1	4602	tags=50%, list=24%, signal=66%
												144	GOBP_LEUKOCYTE_ADHESION_TO_VASCULAR_ENDOTHELIAL_CELL	52	-0.51	-1.45	0.008	0.301	1	2828	tags=37%, list=15%, signal=43%
												145	GOBP_NEGATIVE_REGULATION_OF_NOTCH_SIGNALING_PATHWAY	36	-0.53	-1.45	0.011	0.301	1	6067	tags=58%, list=32%, signal=85%
												146	GOBP_PRESYNAPSE_ORGANIZATION	60	-0.5	-1.45	0.004	0.299	1	5802	tags=58%, list=30%, signal=83%
												147	GOBP_CHLORIDE_TRANSPORT	107	-0.48	-1.45	0.001	0.298	1	5306	tags=46%, list=28%, signal=63%
												148	GOBP_SECONDARY_PALATE_DEVELOPMENT	27	-0.54	-1.45	0.017	0.296	1	5478	tags=63%, list=29%, signal=88%
												149	GOBP_POSITIVE_REGULATION_OF_PROTEIN_IMPORT_INTO_NUCLEUS	53	-0.5	-1.45	0.007	0.302	1	6701	tags=62%, list=35%, signal=95%
												150	GOBP_EPITHELIAL_CELL_MORPHOGENESIS	46	-0.52	-1.45	0.007	0.301	1	5014	tags=48%, list=26%, signal=65%
												151	GOBP_GLYCOSYLCERAMIDE_METABOLIC_PROCESS	16	-0.6	-1.45	0.032	0.3	1	6774	tags=75%, list=35%, signal=116%
												152	GOBP_CELLULAR_RESPONSE_TO_TOPOLOGICALLY_INCORRECT_PROTEIN	102	-0.48	-1.45	0.001	0.3	1	5424	tags=50%, list=28%, signal=69%
												153	GOBP_PROTEIN_LOCALIZATION_TO_GOLGI_APPARATUS	29	-0.55	-1.45	0.017	0.299	1	6095	tags=66%, list=32%, signal=96%
												154	GOBP_BLASTOCYST_FORMATION	59	-0.5	-1.45	0.005	0.298	1	5566	tags=49%, list=29%, signal=69%
												155	GOBP_RESPONSE_TO_HEPATOCYTE_GROWTH_FACTOR	17	-0.59	-1.45	0.024	0.299	1	5094	tags=59%, list=27%, signal=80%
												156	GOBP_NON_CANONICAL_WNT_SIGNALING_PATHWAY	58	-0.5	-1.45	0.003	0.298	1	7505	tags=72%, list=39%, signal=119%
												157	GOBP_CELL_CELL_ADHESION_MEDIATED_BY_INTEGRIN	18	-0.59	-1.45	0.027	0.297	1	2866	tags=39%, list=15%, signal=46%
												158	GOBP_PROTEIN_AUTOUBIQUITINATION	76	-0.49	-1.45	0.005	0.296	1	6456	tags=62%, list=34%, signal=93%
												159	GOBP_REGULATION_OF_RECEPTOR_CLUSTERING	22	-0.56	-1.45	0.027	0.294	1	5794	tags=59%, list=30%, signal=85%
												160	GOBP_SMOOTH_MUSCLE_CELL_MIGRATION	114	-0.47	-1.45	0.001	0.296	1	5695	tags=50%, list=30%, signal=71%
												161	GOBP_VIRAL_TRANSCRIPTION	54	-0.5	-1.44	0.006	0.296	1	5571	tags=52%, list=29%, signal=73%
												162	GOBP_REGULATION_OF_EXTRACELLULAR_MATRIX_ORGANIZATION	60	-0.5	-1.44	0.002	0.295	1	5392	tags=47%, list=28%, signal=65%
												163	GOBP_PEROXISOME_ORGANIZATION	38	-0.52	-1.44	0.012	0.294	1	6445	tags=61%, list=34%, signal=91%
												164	GOBP_CELL_CELL_SIGNALING_INVOLVED_IN_CARDIAC_CONDUCTION	27	-0.55	-1.44	0.017	0.294	1	4164	tags=44%, list=22%, signal=57%
												165	GOBP_PLATELET_DERIVED_GROWTH_FACTOR_RECEPTOR_SIGNALING_PATHWAY	62	-0.49	-1.44	0.004	0.293	1	4488	tags=44%, list=23%, signal=57%
												166	GOBP_ANTIFUNGAL_INNATE_IMMUNE_RESPONSE	21	-0.57	-1.44	0.022	0.292	1	3052	tags=29%, list=16%, signal=34%
												167	GOBP_ARTERY_MORPHOGENESIS	81	-0.49	-1.44	0	0.29	1	5566	tags=49%, list=29%, signal=69%
												168	GOBP_NERVE_DEVELOPMENT	98	-0.48	-1.44	0.003	0.29	1	3131	tags=34%, list=16%, signal=40%
												169	GOBP_REGULATION_OF_DNA_TEMPLATED_DNA_REPLICATION	39	-0.51	-1.44	0.017	0.288	1	5993	tags=51%, list=31%, signal=74%
												170	GOBP_POSITIVE_REGULATION_OF_NEURON_PROJECTION_DEVELOPMENT	233	-0.46	-1.44	0	0.288	1	6203	tags=51%, list=32%, signal=74%
												171	GOBP_HEART_VALVE_FORMATION	15	-0.6	-1.44	0.036	0.288	1	2473	tags=40%, list=13%, signal=46%
												172	GOBP_ROOF_OF_MOUTH_DEVELOPMENT	98	-0.48	-1.44	0.002	0.286	1	6069	tags=55%, list=32%, signal=80%
												173	GOBP_MALE_GENITALIA_DEVELOPMENT	22	-0.56	-1.44	0.024	0.286	1	6990	tags=64%, list=36%, signal=100%
												174	GOBP_VENTRICULAR_SEPTUM_DEVELOPMENT	86	-0.49	-1.44	0.001	0.288	1	7087	tags=58%, list=37%, signal=92%
												175	GOBP_POSITIVE_REGULATION_OF_VASCULAR_ASSOCIATED_SMOOTH_MUSCLE_CELL_PROLIFERATION	43	-0.52	-1.44	0.006	0.289	1	4386	tags=44%, list=23%, signal=57%
												176	GOBP_RELAXATION_OF_MUSCLE	34	-0.53	-1.44	0.016	0.289	1	6164	tags=56%, list=32%, signal=82%
												177	GOBP_REGULATION_OF_MACROAUTOPHAGY	116	-0.47	-1.44	0	0.29	1	6472	tags=56%, list=34%, signal=84%
												178	GOBP_FOCAL_ADHESION_ASSEMBLY	86	-0.48	-1.44	0.001	0.289	1	7215	tags=60%, list=38%, signal=96%
												179	GOBP_RETINAL_GANGLION_CELL_AXON_GUIDANCE	22	-0.56	-1.44	0.023	0.288	1	5081	tags=59%, list=26%, signal=80%
												180	GOBP_NECROPTOTIC_PROCESS	37	-0.52	-1.44	0.006	0.29	1	2177	tags=35%, list=11%, signal=40%
												181	GOBP_POSITIVE_REGULATION_OF_TRANSCRIPTION_BY_RNA_POLYMERASE_III	18	-0.57	-1.44	0.047	0.289	1	5385	tags=56%, list=28%, signal=77%
												182	GOBP_REGULATION_OF_PLATELET_DERIVED_GROWTH_FACTOR_RECEPTOR_SIGNALING_PATHWAY	24	-0.55	-1.44	0.023	0.288	1	4488	tags=46%, list=23%, signal=60%
												183	GOBP_NEGATIVE_REGULATION_OF_CARDIAC_MUSCLE_TISSUE_GROWTH	30	-0.53	-1.44	0.015	0.29	1	4250	tags=50%, list=22%, signal=64%
												184	GOBP_PROTEIN_K63_LINKED_DEUBIQUITINATION	30	-0.53	-1.43	0.014	0.291	1	7376	tags=73%, list=38%, signal=119%
												185	GOBP_NEGATIVE_REGULATION_OF_MUSCLE_CONTRACTION	30	-0.52	-1.43	0.018	0.29	1	6501	tags=60%, list=34%, signal=91%
												186	GOBP_RESPONSE_TO_CATECHOLAMINE	72	-0.48	-1.43	0.002	0.29	1	4786	tags=46%, list=25%, signal=61%
												187	GOBP_EPHRIN_RECEPTOR_SIGNALING_PATHWAY	38	-0.52	-1.43	0.013	0.295	1	7215	tags=66%, list=38%, signal=105%
												188	GOBP_HAIR_CELL_DIFFERENTIATION	70	-0.49	-1.43	0.007	0.295	1	3368	tags=37%, list=18%, signal=45%
												189	GOBP_SODIUM_ION_IMPORT_ACROSS_PLASMA_MEMBRANE	22	-0.56	-1.43	0.029	0.294	1	3550	tags=41%, list=19%, signal=50%
												190	GOBP_COLLAGEN_ACTIVATED_SIGNALING_PATHWAY	17	-0.58	-1.43	0.03	0.295	1	5212	tags=59%, list=27%, signal=81%
												191	GOBP_CELLULAR_RESPONSE_TO_TYPE_II_INTERFERON	106	-0.47	-1.43	0	0.295	1	5231	tags=46%, list=27%, signal=63%
												192	GOBP_PROTEOGLYCAN_BIOSYNTHETIC_PROCESS	62	-0.49	-1.43	0.001	0.298	1	7098	tags=66%, list=37%, signal=105%
												193	GOBP_REGULATION_OF_AMINE_METABOLIC_PROCESS	39	-0.51	-1.43	0.009	0.298	1	4079	tags=38%, list=21%, signal=49%
												194	GOBP_TROPHECTODERMAL_CELL_DIFFERENTIATION	25	-0.54	-1.43	0.026	0.297	1	5566	tags=52%, list=29%, signal=73%
												195	GOBP_POSITIVE_REGULATION_OF_MACROPHAGE_CYTOKINE_PRODUCTION	28	-0.54	-1.43	0.021	0.296	1	5741	tags=61%, list=30%, signal=87%
												196	GOBP_ANATOMICAL_STRUCTURE_ARRANGEMENT	21	-0.56	-1.43	0.027	0.295	1	4942	tags=57%, list=26%, signal=77%
												197	GOBP_DIGESTIVE_TRACT_MORPHOGENESIS	54	-0.49	-1.43	0.01	0.296	1	7576	tags=56%, list=40%, signal=92%
												198	GOBP_NEGATIVE_REGULATION_OF_JNK_CASCADE	37	-0.51	-1.43	0.013	0.295	1	4857	tags=43%, list=25%, signal=58%
												199	GOBP_MITOCHONDRIAL_DNA_REPLICATION	15	-0.59	-1.43	0.028	0.294	1	4992	tags=53%, list=26%, signal=72%
												200	GOBP_REGULATION_OF_DNA_REPLICATION	122	-0.47	-1.43	0	0.295	1	5385	tags=46%, list=28%, signal=63%
												201	GOBP_DETECTION_OF_MECHANICAL_STIMULUS_INVOLVED_IN_SENSORY_PERCEPTION_OF_SOUND	22	-0.55	-1.43	0.033	0.297	1	3368	tags=36%, list=18%, signal=44%
												202	GOBP_INHIBITORY_SYNAPSE_ASSEMBLY	20	-0.57	-1.43	0.031	0.296	1	1125	tags=35%, list=6%, signal=37%
												203	GOBP_L_GLUTAMATE_IMPORT_ACROSS_PLASMA_MEMBRANE	17	-0.59	-1.43	0.036	0.296	1	7850	tags=94%, list=41%, signal=159%
												204	GOBP_REGULATION_OF_TRANSCRIPTION_INVOLVED_IN_G1_S_TRANSITION_OF_MITOTIC_CELL_CYCLE	18	-0.57	-1.42	0.04	0.297	1	7006	tags=72%, list=37%, signal=114%
												205	GOBP_ALDITOL_METABOLIC_PROCESS	25	-0.53	-1.42	0.033	0.296	1	4578	tags=36%, list=24%, signal=47%
												206	GOBP_INFLAMMASOME_MEDIATED_SIGNALING_PATHWAY	41	-0.51	-1.42	0.012	0.298	1	5282	tags=49%, list=28%, signal=67%
												207	GOBP_REGULATION_OF_CENTRIOLE_REPLICATION	20	-0.56	-1.42	0.038	0.297	1	4485	tags=50%, list=23%, signal=65%
												208	GOBP_VENTRICULAR_CARDIAC_MUSCLE_CELL_MEMBRANE_REPOLARIZATION	24	-0.54	-1.42	0.028	0.296	1	4927	tags=50%, list=26%, signal=67%
												209	GOBP_PEPTIDE_CATABOLIC_PROCESS	23	-0.55	-1.42	0.033	0.295	1	4760	tags=57%, list=25%, signal=75%
												210	GOBP_OUTFLOW_TRACT_MORPHOGENESIS	88	-0.47	-1.42	0.002	0.296	1	5459	tags=51%, list=28%, signal=71%
												211	GOBP_VASCULAR_ASSOCIATED_SMOOTH_MUSCLE_CELL_PROLIFERATION	80	-0.48	-1.42	0.005	0.295	1	4386	tags=39%, list=23%, signal=50%
												212	GOBP_POSITIVE_REGULATION_OF_MITOCHONDRIAL_FISSION	22	-0.56	-1.42	0.032	0.294	1	6339	tags=68%, list=33%, signal=102%
												213	GOBP_ENDODERM_FORMATION	42	-0.51	-1.42	0.018	0.296	1	3903	tags=45%, list=20%, signal=57%
												214	GOBP_ANTIGEN_PROCESSING_AND_PRESENTATION_OF_EXOGENOUS_ANTIGEN	37	-0.51	-1.42	0.019	0.294	1	5849	tags=59%, list=30%, signal=85%
												215	GOBP_MEMBRANE_PROTEIN_ECTODOMAIN_PROTEOLYSIS	45	-0.5	-1.42	0.011	0.295	1	5741	tags=58%, list=30%, signal=82%
												216	GOBP_POSITIVE_REGULATION_OF_TRANSCRIPTION_FROM_RNA_POLYMERASE_II_PROMOTER_INVOLVED_IN_CELLULAR_RESPONSE_TO_CHEMICAL_STIMULUS	16	-0.59	-1.42	0.046	0.294	1	3736	tags=50%, list=19%, signal=62%
												217	GOBP_REGULATION_OF_NEUROBLAST_PROLIFERATION	65	-0.49	-1.42	0.006	0.298	1	4477	tags=43%, list=23%, signal=56%
												218	GOBP_ESTABLISHMENT_OF_PLANAR_POLARITY_OF_EMBRYONIC_EPITHELIUM	18	-0.56	-1.42	0.046	0.298	1	6581	tags=72%, list=34%, signal=110%
												219	GOBP_MORPHOGENESIS_OF_AN_EPITHELIAL_SHEET	61	-0.49	-1.42	0.005	0.299	1	6617	tags=57%, list=35%, signal=87%
												220	GOBP_POSITIVE_REGULATION_OF_CELL_JUNCTION_ASSEMBLY	125	-0.46	-1.42	0	0.298	1	7215	tags=57%, list=38%, signal=90%
												221	GOBP_VASCULAR_ENDOTHELIAL_GROWTH_FACTOR_PRODUCTION	37	-0.51	-1.42	0.028	0.301	1	3444	tags=43%, list=18%, signal=53%
												222	GOBP_MORPHOGENESIS_OF_A_BRANCHING_STRUCTURE	252	-0.45	-1.42	0	0.299	1	7385	tags=56%, list=39%, signal=89%
												223	GOBP_NEGATIVE_REGULATION_OF_ENDOTHELIAL_CELL_PROLIFERATION	46	-0.5	-1.42	0.012	0.298	1	3077	tags=39%, list=16%, signal=46%
												224	GOBP_MANNOSYLATION	22	-0.54	-1.42	0.035	0.298	1	8192	tags=82%, list=43%, signal=143%
												225	GOBP_REGULATION_OF_DENDRITIC_SPINE_MAINTENANCE	16	-0.58	-1.42	0.032	0.297	1	2968	tags=44%, list=15%, signal=52%
												226	GOBP_HIPPO_SIGNALING	39	-0.51	-1.42	0.013	0.298	1	4949	tags=54%, list=26%, signal=72%
												227	GOBP_PROTEIN_K63_LINKED_UBIQUITINATION	60	-0.49	-1.42	0.011	0.297	1	6454	tags=53%, list=34%, signal=80%
												228	GOBP_ENDOPLASMIC_RETICULUM_UNFOLDED_PROTEIN_RESPONSE	70	-0.48	-1.42	0.007	0.296	1	5292	tags=49%, list=28%, signal=67%
												229	GOBP_CELL_CYCLE_DNA_REPLICATION	41	-0.5	-1.41	0.018	0.298	1	7168	tags=61%, list=37%, signal=97%
												230	GOBP_POSITIVE_REGULATION_OF_PROTEIN_LOCALIZATION_TO_CELL_PERIPHERY	74	-0.49	-1.41	0.004	0.297	1	6129	tags=55%, list=32%, signal=81%
												231	GOBP_SYNAPTONEMAL_COMPLEX_ORGANIZATION	28	-0.53	-1.41	0.026	0.299	1	1316	tags=21%, list=7%, signal=23%
												232	GOBP_MICROTUBULE_NUCLEATION	35	-0.51	-1.41	0.02	0.297	1	7185	tags=71%, list=37%, signal=114%
												233	GOBP_REGULATION_OF_NOTCH_SIGNALING_PATHWAY	88	-0.47	-1.41	0.003	0.297	1	6265	tags=57%, list=33%, signal=84%
												234	GOBP_REGULATION_OF_SYSTEMIC_ARTERIAL_BLOOD_PRESSURE_BY_RENIN_ANGIOTENSIN	29	-0.52	-1.41	0.02	0.296	1	2431	tags=38%, list=13%, signal=43%
												235	GOBP_NEUROTRANSMITTER_GATED_ION_CHANNEL_CLUSTERING	22	-0.55	-1.41	0.027	0.297	1	7297	tags=68%, list=38%, signal=110%
												236	GOBP_NEGATIVE_REGULATION_OF_ALPHA_BETA_T_CELL_PROLIFERATION	16	-0.58	-1.41	0.046	0.298	1	3610	tags=50%, list=19%, signal=62%
												237	GOBP_HEMOGLOBIN_METABOLIC_PROCESS	22	-0.55	-1.41	0.033	0.297	1	3424	tags=45%, list=18%, signal=55%
												238	GOBP_ASTROCYTE_DEVELOPMENT	36	-0.52	-1.41	0.017	0.296	1	6145	tags=61%, list=32%, signal=90%
												239	GOBP_DETECTION_OF_MECHANICAL_STIMULUS_INVOLVED_IN_SENSORY_PERCEPTION_OF_PAIN	26	-0.54	-1.41	0.031	0.295	1	2334	tags=35%, list=12%, signal=39%
												240	GOBP_POSITIVE_REGULATION_OF_POTASSIUM_ION_TRANSPORT	51	-0.49	-1.41	0.01	0.295	1	5246	tags=45%, list=27%, signal=62%
												241	GOBP_G_PROTEIN_COUPLED_RECEPTOR_SIGNALING_PATHWAY_INVOLVED_IN_HEART_PROCESS	15	-0.58	-1.41	0.04	0.294	1	4503	tags=47%, list=23%, signal=61%
												242	GOBP_CELLULAR_RESPONSE_TO_UNFOLDED_PROTEIN	82	-0.48	-1.41	0.002	0.294	1	4795	tags=46%, list=25%, signal=62%
												243	GOBP_GAP_JUNCTION_ASSEMBLY	17	-0.56	-1.41	0.048	0.294	1	4936	tags=53%, list=26%, signal=71%
												244	GOBP_NEGATIVE_REGULATION_OF_VASCULAR_PERMEABILITY	18	-0.57	-1.41	0.04	0.293	1	5387	tags=67%, list=28%, signal=93%
												245	GOBP_CELL_SUBSTRATE_JUNCTION_ORGANIZATION	104	-0.46	-1.41	0	0.293	1	7242	tags=60%, list=38%, signal=95%
												246	GOBP_CELLULAR_RESPONSE_TO_GLUCOSE_STARVATION	50	-0.5	-1.41	0.01	0.293	1	6608	tags=60%, list=34%, signal=91%
												247	GOBP_REGULATION_OF_NEURON_MIGRATION	58	-0.49	-1.41	0.008	0.292	1	5190	tags=50%, list=27%, signal=68%
												248	GOBP_REGULATION_OF_VIRAL_TRANSCRIPTION	24	-0.54	-1.41	0.039	0.292	1	5571	tags=58%, list=29%, signal=82%
												249	GOBP_REGULATION_OF_CARDIAC_MUSCLE_CELL_ACTION_POTENTIAL	26	-0.53	-1.41	0.031	0.292	1	6488	tags=62%, list=34%, signal=93%
												250	GOBP_PROTEIN_O_LINKED_GLYCOSYLATION	80	-0.47	-1.41	0.006	0.292	1	4857	tags=49%, list=25%, signal=65%
												251	GOBP_VENTRICULAR_CARDIAC_MUSCLE_CELL_ACTION_POTENTIAL	29	-0.52	-1.41	0.038	0.291	1	6488	tags=59%, list=34%, signal=88%
												252	GOBP_CELL_CELL_ADHESION_MEDIATED_BY_CADHERIN	44	-0.51	-1.41	0.011	0.291	1	6444	tags=64%, list=34%, signal=96%
												253	GOBP_POSITIVE_REGULATION_OF_TRANSLATIONAL_INITIATION	23	-0.54	-1.41	0.029	0.293	1	3567	tags=48%, list=19%, signal=59%
												254	GOBP_DIGESTIVE_SYSTEM_DEVELOPMENT	141	-0.46	-1.41	0	0.292	1	7090	tags=51%, list=37%, signal=80%
												255	GOBP_RESPONSE_TO_PLATELET_DERIVED_GROWTH_FACTOR	23	-0.55	-1.41	0.025	0.291	1	2647	tags=39%, list=14%, signal=45%
												256	GOBP_GLUTAMATE_METABOLIC_PROCESS	29	-0.52	-1.41	0.025	0.29	1	6264	tags=52%, list=33%, signal=77%
												257	GOBP_GLYCOPROTEIN_BIOSYNTHETIC_PROCESS	279	-0.45	-1.41	0	0.29	1	7186	tags=60%, list=37%, signal=94%
												258	GOBP_AXON_ENSHEATHMENT_IN_CENTRAL_NERVOUS_SYSTEM	29	-0.52	-1.41	0.031	0.289	1	5647	tags=55%, list=29%, signal=78%
												259	GOBP_POSITIVE_REGULATION_OF_HEART_RATE	30	-0.52	-1.41	0.025	0.29	1	4748	tags=43%, list=25%, signal=58%
												260	GOBP_PROTEOGLYCAN_METABOLIC_PROCESS	89	-0.47	-1.41	0.002	0.292	1	7108	tags=63%, list=37%, signal=100%
												261	GOBP_POSITIVE_REGULATION_OF_SMOOTH_MUSCLE_CELL_PROLIFERATION	115	-0.46	-1.41	0	0.291	1	4410	tags=41%, list=23%, signal=53%
												262	GOBP_RETINA_VASCULATURE_DEVELOPMENT_IN_CAMERA_TYPE_EYE	25	-0.53	-1.4	0.04	0.29	1	7326	tags=64%, list=38%, signal=103%
												263	GOBP_CELL_REDOX_HOMEOSTASIS	30	-0.51	-1.4	0.03	0.29	1	5888	tags=57%, list=31%, signal=82%
												264	GOBP_POSITIVE_REGULATION_OF_NERVOUS_SYSTEM_DEVELOPMENT	380	-0.44	-1.4	0	0.289	1	7326	tags=54%, list=38%, signal=86%
												265	GOBP_OLIGOSACCHARIDE_METABOLIC_PROCESS	51	-0.49	-1.4	0.011	0.289	1	5346	tags=51%, list=28%, signal=70%
												266	GOBP_MUSCLE_CELL_MIGRATION	129	-0.46	-1.4	0.001	0.289	1	5695	tags=47%, list=30%, signal=67%
												267	GOBP_POSITIVE_REGULATION_OF_SMOOTH_MUSCLE_CELL_MIGRATION	67	-0.48	-1.4	0.008	0.29	1	5695	tags=49%, list=30%, signal=70%
												268	GOBP_PHAGOSOME_MATURATION	28	-0.54	-1.4	0.027	0.29	1	6018	tags=68%, list=31%, signal=99%
												269	GOBP_POSITIVE_REGULATION_BY_HOST_OF_VIRAL_TRANSCRIPTION	17	-0.57	-1.4	0.042	0.289	1	4274	tags=47%, list=22%, signal=61%
												270	GOBP_T_CELL_MEDIATED_CYTOTOXICITY	48	-0.49	-1.4	0.011	0.29	1	6808	tags=60%, list=35%, signal=93%
												271	GOBP_SYNAPSE_ASSEMBLY	217	-0.45	-1.4	0	0.291	1	5081	tags=44%, list=26%, signal=59%
												272	GOBP_SUBSTRATE_DEPENDENT_CELL_MIGRATION	30	-0.53	-1.4	0.031	0.291	1	6292	tags=60%, list=33%, signal=89%
												273	GOBP_NEGATIVE_REGULATION_OF_MUSCLE_CELL_APOPTOTIC_PROCESS	66	-0.48	-1.4	0.006	0.293	1	5372	tags=45%, list=28%, signal=63%
												274	GOBP_CARDIAC_MUSCLE_CELL_CONTRACTION	70	-0.48	-1.4	0.007	0.292	1	2513	tags=33%, list=13%, signal=38%
												275	GOBP_RESPONSE_TO_AMINO_ACID_STARVATION	52	-0.49	-1.4	0.024	0.292	1	4191	tags=44%, list=22%, signal=56%
												276	GOBP_GLYCOPROTEIN_METABOLIC_PROCESS	344	-0.44	-1.4	0	0.292	1	7186	tags=58%, list=37%, signal=91%
												277	GOBP_POSITIVE_REGULATION_OF_SYNAPSE_ASSEMBLY	79	-0.47	-1.4	0.001	0.291	1	7141	tags=58%, list=37%, signal=92%
												278	GOBP_ACROSOME_REACTION	38	-0.51	-1.4	0.017	0.291	1	3693	tags=37%, list=19%, signal=46%
												279	GOBP_POSITIVE_REGULATION_OF_NEUROGENESIS	319	-0.44	-1.4	0	0.29	1	7326	tags=54%, list=38%, signal=86%
												280	GOBP_REGULATION_OF_CELL_CELL_ADHESION_MEDIATED_BY_CADHERIN	17	-0.56	-1.4	0.047	0.29	1	5277	tags=59%, list=28%, signal=81%
												281	GOBP_CARDIAC_SEPTUM_MORPHOGENESIS	83	-0.47	-1.4	0.008	0.291	1	7111	tags=58%, list=37%, signal=92%
												282	GOBP_POSITIVE_REGULATION_OF_POTASSIUM_ION_TRANSMEMBRANE_TRANSPORT	42	-0.5	-1.4	0.02	0.29	1	5178	tags=45%, list=27%, signal=62%
												283	GOBP_AMINOGLYCAN_BIOSYNTHETIC_PROCESS	59	-0.48	-1.4	0.009	0.289	1	7026	tags=61%, list=37%, signal=96%
												284	GOBP_NUCLEOBASE_METABOLIC_PROCESS	41	-0.5	-1.4	0.014	0.293	1	6079	tags=51%, list=32%, signal=75%
												285	GOBP_ATRIOVENTRICULAR_VALVE_DEVELOPMENT	30	-0.52	-1.4	0.026	0.292	1	7326	tags=70%, list=38%, signal=113%
												286	GOBP_DETECTION_OF_MECHANICAL_STIMULUS_INVOLVED_IN_SENSORY_PERCEPTION	55	-0.48	-1.4	0.007	0.292	1	3368	tags=33%, list=18%, signal=40%
												287	GOBP_PROTEIN_LOCALIZATION_TO_CHROMOSOME_CENTROMERIC_REGION	22	-0.54	-1.4	0.039	0.292	1	5908	tags=59%, list=31%, signal=85%
												288	GOBP_VASODILATION	65	-0.48	-1.4	0.006	0.291	1	7170	tags=63%, list=37%, signal=100%
												289	GOBP_CELL_COMMUNICATION_INVOLVED_IN_CARDIAC_CONDUCTION	40	-0.5	-1.4	0.024	0.291	1	6488	tags=58%, list=34%, signal=87%
												290	GOBP_REGULATION_OF_PATTERN_RECOGNITION_RECEPTOR_SIGNALING_PATHWAY	134	-0.46	-1.4	0	0.291	1	5886	tags=49%, list=31%, signal=69%
												291	GOBP_HEART_VALVE_DEVELOPMENT	65	-0.48	-1.4	0.013	0.29	1	7087	tags=62%, list=37%, signal=97%
												292	GOBP_TYPE_II_INTERFERON_MEDIATED_SIGNALING_PATHWAY	22	-0.53	-1.4	0.048	0.291	1	7110	tags=68%, list=37%, signal=108%
												293	GOBP_DEVELOPMENTAL_CELL_GROWTH	282	-0.44	-1.4	0	0.29	1	7065	tags=57%, list=37%, signal=89%
												294	GOBP_CORTICAL_CYTOSKELETON_ORGANIZATION	52	-0.49	-1.4	0.013	0.289	1	6412	tags=50%, list=33%, signal=75%
												295	GOBP_REGULATION_OF_DELAYED_RECTIFIER_POTASSIUM_CHANNEL_ACTIVITY	19	-0.55	-1.39	0.047	0.289	1	2100	tags=32%, list=11%, signal=35%
												296	GOBP_FOLIC_ACID_CONTAINING_COMPOUND_METABOLIC_PROCESS	24	-0.54	-1.39	0.041	0.288	1	7196	tags=71%, list=38%, signal=113%
												297	GOBP_NEGATIVE_REGULATION_OF_ORGAN_GROWTH	42	-0.51	-1.39	0.011	0.288	1	4290	tags=45%, list=22%, signal=58%
												298	GOBP_RETINAL_METABOLIC_PROCESS	18	-0.56	-1.39	0.054	0.288	1	2863	tags=33%, list=15%, signal=39%
												299	GOBP_TOLL_LIKE_RECEPTOR_4_SIGNALING_PATHWAY	55	-0.49	-1.39	0.008	0.288	1	6706	tags=55%, list=35%, signal=84%
												300	GOBP_POSITIVE_REGULATION_OF_PROTEIN_LOCALIZATION_TO_PLASMA_MEMBRANE	62	-0.48	-1.39	0.002	0.288	1	6002	tags=53%, list=31%, signal=77%
												301	GOBP_ANTIGEN_PROCESSING_AND_PRESENTATION_OF_EXOGENOUS_PEPTIDE_ANTIGEN_VIA_MHC_CLASS_II	19	-0.56	-1.39	0.048	0.288	1	2894	tags=47%, list=15%, signal=56%
												302	GOBP_SYNAPTIC_VESICLE_MATURATION	27	-0.52	-1.39	0.038	0.288	1	4363	tags=48%, list=23%, signal=62%
												303	GOBP_NEGATIVE_REGULATION_OF_VIRAL_INDUCED_CYTOPLASMIC_PATTERN_RECOGNITION_RECEPTOR_SIGNALING_PATHWAY	35	-0.5	-1.39	0.029	0.288	1	5886	tags=49%, list=31%, signal=70%
												304	GOBP_L_ALPHA_AMINO_ACID_TRANSMEMBRANE_TRANSPORT	69	-0.47	-1.39	0.008	0.288	1	7850	tags=64%, list=41%, signal=108%
												305	GOBP_REGULATION_OF_CALCIUM_ION_IMPORT_ACROSS_PLASMA_MEMBRANE	19	-0.55	-1.39	0.048	0.287	1	2121	tags=32%, list=11%, signal=35%
												306	GOBP_POSITIVE_REGULATION_OF_FIBROBLAST_MIGRATION	25	-0.53	-1.39	0.038	0.289	1	6530	tags=64%, list=34%, signal=97%
												307	GOBP_REGULATION_OF_ENDOPLASMIC_RETICULUM_UNFOLDED_PROTEIN_RESPONSE	25	-0.53	-1.39	0.026	0.288	1	4772	tags=44%, list=25%, signal=58%
												308	GOBP_NUCLEOTIDE_BINDING_DOMAIN_LEUCINE_RICH_REPEAT_CONTAINING_RECEPTOR_SIGNALING_PATHWAY	22	-0.55	-1.39	0.036	0.288	1	4602	tags=50%, list=24%, signal=66%
												309	GOBP_POSITIVE_REGULATION_OF_FAT_CELL_DIFFERENTIATION	71	-0.48	-1.39	0.008	0.288	1	6125	tags=51%, list=32%, signal=74%
												310	GOBP_MAMMARY_GLAND_EPITHELIAL_CELL_DIFFERENTIATION	15	-0.58	-1.39	0.052	0.288	1	1429	tags=33%, list=7%, signal=36%
												311	GOBP_MRNA_POLYADENYLATION	20	-0.54	-1.39	0.046	0.288	1	4522	tags=50%, list=24%, signal=65%
												312	GOBP_POSITIVE_REGULATION_OF_FATTY_ACID_BIOSYNTHETIC_PROCESS	27	-0.53	-1.39	0.031	0.288	1	4986	tags=48%, list=26%, signal=65%
												313	GOBP_MEMBRANE_PROTEIN_PROTEOLYSIS	59	-0.48	-1.39	0.008	0.288	1	7219	tags=64%, list=38%, signal=103%
												314	GOBP_NEURON_PROJECTION_EXTENSION	209	-0.45	-1.39	0	0.289	1	7065	tags=57%, list=37%, signal=89%
												315	GOBP_NUCLEOTIDE_SUGAR_METABOLIC_PROCESS	34	-0.51	-1.39	0.03	0.29	1	6031	tags=56%, list=31%, signal=81%
												316	GOBP_SELECTIVE_AUTOPHAGY	94	-0.46	-1.39	0.003	0.289	1	6583	tags=54%, list=34%, signal=82%
												317	GOBP_CELLULAR_RESPONSE_TO_OXYGEN_LEVELS	141	-0.45	-1.39	0.001	0.289	1	4748	tags=40%, list=25%, signal=52%
												318	GOBP_RENAL_SYSTEM_VASCULATURE_DEVELOPMENT	28	-0.51	-1.39	0.035	0.288	1	4180	tags=46%, list=22%, signal=59%
												319	GOBP_NEGATIVE_REGULATION_OF_OXIDATIVE_STRESS_INDUCED_INTRINSIC_APOPTOTIC_SIGNALING_PATHWAY	26	-0.52	-1.39	0.04	0.289	1	4748	tags=42%, list=25%, signal=56%
												320	GOBP_PROTEIN_TARGETING_TO_LYSOSOME	29	-0.52	-1.39	0.044	0.289	1	6378	tags=69%, list=33%, signal=103%
												321	GOBP_REGULATION_OF_BMP_SIGNALING_PATHWAY	107	-0.46	-1.39	0.001	0.295	1	6207	tags=50%, list=32%, signal=74%
												322	GOBP_REGULATION_OF_PROTEIN_STABILITY	305	-0.44	-1.39	0	0.294	1	6081	tags=49%, list=32%, signal=70%
												323	GOBP_PTERIDINE_CONTAINING_COMPOUND_METABOLIC_PROCESS	28	-0.52	-1.38	0.031	0.295	1	7196	tags=71%, list=38%, signal=114%
												324	GOBP_POSITIVE_REGULATION_OF_MEIOTIC_NUCLEAR_DIVISION	21	-0.54	-1.38	0.057	0.295	1	3341	tags=38%, list=17%, signal=46%
												325	GOBP_PROTEIN_STABILIZATION	194	-0.44	-1.38	0	0.295	1	6862	tags=56%, list=36%, signal=86%
												326	GOBP_REGULATION_OF_POSTSYNAPTIC_MEMBRANE_POTENTIAL	128	-0.45	-1.38	0.002	0.298	1	6164	tags=48%, list=32%, signal=71%
												327	GOBP_ENDOTHELIUM_DEVELOPMENT	137	-0.45	-1.38	0	0.297	1	5383	tags=49%, list=28%, signal=68%
												328	GOBP_NEUROTRANSMITTER_RECEPTOR_LOCALIZATION_TO_POSTSYNAPTIC_SPECIALIZATION_MEMBRANE	41	-0.49	-1.38	0.018	0.297	1	7248	tags=63%, list=38%, signal=102%
												329	GOBP_REGULATION_OF_SYNAPTIC_VESICLE_EXOCYTOSIS	59	-0.48	-1.38	0.015	0.296	1	7321	tags=66%, list=38%, signal=107%
												330	GOBP_SYNAPTIC_TRANSMISSION_CHOLINERGIC	31	-0.51	-1.38	0.035	0.296	1	3726	tags=32%, list=19%, signal=40%
												331	GOBP_REGULATION_OF_STRESS_ACTIVATED_PROTEIN_KINASE_SIGNALING_CASCADE	198	-0.44	-1.38	0	0.297	1	5538	tags=46%, list=29%, signal=64%
												332	GOBP_POSITIVE_REGULATION_OF_PEPTIDYL_LYSINE_ACETYLATION	20	-0.54	-1.38	0.056	0.297	1	6854	tags=75%, list=36%, signal=117%
												333	GOBP_REGULATION_OF_ERAD_PATHWAY	24	-0.53	-1.38	0.045	0.297	1	5989	tags=58%, list=31%, signal=85%
												334	GOBP_ANGIOTENSIN_ACTIVATED_SIGNALING_PATHWAY	19	-0.55	-1.38	0.054	0.297	1	3023	tags=32%, list=16%, signal=37%
												335	GOBP_NUCLEAR_MEMBRANE_REASSEMBLY	19	-0.55	-1.38	0.048	0.298	1	4688	tags=53%, list=24%, signal=70%
												336	GOBP_MALE_SEX_DETERMINATION	16	-0.57	-1.38	0.062	0.299	1	975	tags=25%, list=5%, signal=26%
												337	GOBP_BONE_REMODELING	108	-0.46	-1.38	0.002	0.3	1	6318	tags=49%, list=33%, signal=73%
												338	GOBP_SUCKLING_BEHAVIOR	17	-0.56	-1.38	0.066	0.301	1	4767	tags=47%, list=25%, signal=63%
												339	GOBP_CARDIAC_SEPTUM_DEVELOPMENT	127	-0.45	-1.38	0	0.301	1	7111	tags=55%, list=37%, signal=87%
												340	GOBP_MEMBRANE_REPOLARIZATION	48	-0.48	-1.38	0.016	0.3	1	5178	tags=46%, list=27%, signal=63%
												341	GOBP_EMBRYONIC_PLACENTA_MORPHOGENESIS	31	-0.51	-1.38	0.037	0.299	1	8137	tags=74%, list=42%, signal=129%
												342	GOBP_DEFENSE_RESPONSE_TO_SYMBIONT	290	-0.44	-1.38	0	0.3	1	6690	tags=51%, list=35%, signal=77%
												343	GOBP_RESPONSE_TO_GROWTH_HORMONE	20	-0.54	-1.38	0.053	0.301	1	7569	tags=75%, list=39%, signal=124%
												344	GOBP_SEX_DETERMINATION	25	-0.53	-1.38	0.051	0.301	1	1521	tags=24%, list=8%, signal=26%
												345	GOBP_NEGATIVE_REGULATION_OF_FATTY_ACID_BIOSYNTHETIC_PROCESS	18	-0.56	-1.38	0.052	0.301	1	2276	tags=39%, list=12%, signal=44%
												346	GOBP_CARDIAC_CONDUCTION	65	-0.47	-1.38	0.016	0.301	1	6488	tags=52%, list=34%, signal=79%
												347	GOBP_VASCULAR_ASSOCIATED_SMOOTH_MUSCLE_CONTRACTION	29	-0.51	-1.38	0.046	0.301	1	6851	tags=55%, list=36%, signal=86%
												348	GOBP_PYRIMIDINE_NUCLEOBASE_METABOLIC_PROCESS	19	-0.55	-1.38	0.044	0.301	1	4881	tags=53%, list=25%, signal=71%
												349	GOBP_SKELETAL_MUSCLE_CELL_PROLIFERATION	22	-0.54	-1.38	0.05	0.303	1	7108	tags=73%, list=37%, signal=115%
												350	GOBP_REGULATION_OF_NEURONAL_SYNAPTIC_PLASTICITY	72	-0.47	-1.38	0.012	0.302	1	4507	tags=43%, list=24%, signal=56%
												351	GOBP_PROTEIN_LOCALIZATION_TO_CELL_JUNCTION	132	-0.45	-1.37	0.001	0.305	1	7248	tags=58%, list=38%, signal=93%
												352	GOBP_REGULATION_OF_CELL_JUNCTION_ASSEMBLY	241	-0.44	-1.37	0	0.304	1	5569	tags=45%, list=29%, signal=63%
												353	GOBP_CELL_CELL_JUNCTION_MAINTENANCE	22	-0.54	-1.37	0.052	0.304	1	3085	tags=36%, list=16%, signal=43%
												354	GOBP_POSITIVE_REGULATION_OF_CANONICAL_NF_KAPPAB_SIGNAL_TRANSDUCTION	129	-0.45	-1.37	0	0.304	1	7677	tags=61%, list=40%, signal=101%
												355	GOBP_REGULATION_OF_CENTROSOME_DUPLICATION	43	-0.49	-1.37	0.029	0.303	1	4748	tags=49%, list=25%, signal=65%
												356	GOBP_RESPONSE_TO_UNFOLDED_PROTEIN	111	-0.46	-1.37	0.003	0.303	1	4795	tags=43%, list=25%, signal=57%
												357	GOBP_NEURON_RECOGNITION	47	-0.48	-1.37	0.02	0.303	1	6091	tags=53%, list=32%, signal=78%
												358	GOBP_RESPONSE_TO_ESTROGEN	57	-0.48	-1.37	0.018	0.302	1	6391	tags=47%, list=33%, signal=71%
												359	GOBP_EXCITATORY_SYNAPSE_ASSEMBLY	38	-0.49	-1.37	0.032	0.304	1	5802	tags=50%, list=30%, signal=72%
												360	GOBP_NEGATIVE_REGULATION_OF_INTRINSIC_APOPTOTIC_SIGNALING_PATHWAY_BY_P53_CLASS_MEDIATOR	22	-0.54	-1.37	0.056	0.303	1	2847	tags=36%, list=15%, signal=43%
												361	GOBP_MEMBRANE_DOCKING	87	-0.46	-1.37	0.006	0.305	1	7526	tags=62%, list=39%, signal=102%
												362	GOBP_CELL_MIGRATION_IN_HINDBRAIN	23	-0.52	-1.37	0.047	0.305	1	5576	tags=57%, list=29%, signal=80%
												363	GOBP_REGULATION_OF_RESPONSE_TO_ENDOPLASMIC_RETICULUM_STRESS	79	-0.46	-1.37	0.006	0.305	1	5269	tags=42%, list=27%, signal=57%
												364	GOBP_POSITIVE_REGULATION_OF_DNA_REPLICATION	48	-0.48	-1.37	0.018	0.306	1	5993	tags=54%, list=31%, signal=79%
												365	GOBP_TISSUE_REMODELING	212	-0.44	-1.37	0	0.305	1	6641	tags=49%, list=35%, signal=73%
												366	GOBP_POSITIVE_REGULATION_OF_INTERLEUKIN_1_BETA_PRODUCTION	55	-0.47	-1.37	0.016	0.306	1	7897	tags=67%, list=41%, signal=114%
												367	GOBP_AUTOPHAGOSOME_ORGANIZATION	120	-0.45	-1.37	0.002	0.305	1	7361	tags=61%, list=38%, signal=98%
												368	GOBP_NEGATIVE_REGULATION_OF_DEVELOPMENTAL_GROWTH	126	-0.45	-1.37	0	0.305	1	4290	tags=40%, list=22%, signal=52%
												369	GOBP_CELL_JUNCTION_ASSEMBLY	462	-0.43	-1.37	0	0.305	1	7170	tags=53%, list=37%, signal=82%
												370	GOBP_POSITIVE_REGULATION_OF_RESPONSE_TO_BIOTIC_STIMULUS	352	-0.43	-1.37	0	0.304	1	7157	tags=51%, list=37%, signal=81%
												371	GOBP_REGULATION_OF_CATION_CHANNEL_ACTIVITY	141	-0.45	-1.37	0	0.303	1	4194	tags=35%, list=22%, signal=45%
												372	GOBP_PROTEIN_N_LINKED_GLYCOSYLATION_VIA_ASPARAGINE	15	-0.57	-1.37	0.078	0.304	1	6245	tags=80%, list=33%, signal=119%
												373	GOBP_NUCLEAR_ENVELOPE_ORGANIZATION	48	-0.48	-1.37	0.022	0.303	1	4688	tags=42%, list=24%, signal=55%
												374	GOBP_POSITIVE_REGULATION_OF_AUTOPHAGY	149	-0.45	-1.37	0.001	0.305	1	6415	tags=51%, list=33%, signal=76%
												375	GOBP_ANTIGEN_PROCESSING_AND_PRESENTATION_OF_PEPTIDE_ANTIGEN_VIA_MHC_CLASS_I	26	-0.52	-1.37	0.043	0.306	1	5334	tags=58%, list=28%, signal=80%
												376	GOBP_NEGATIVE_REGULATION_OF_AUTOPHAGY	80	-0.46	-1.37	0.005	0.307	1	7541	tags=61%, list=39%, signal=101%
												377	GOBP_POSITIVE_REGULATION_OF_PHOSPHATIDYLINOSITOL_3_KINASE_PROTEIN_KINASE_B_SIGNAL_TRANSDUCTION	182	-0.44	-1.37	0.001	0.306	1	5347	tags=42%, list=28%, signal=58%
												378	GOBP_PHAGOLYSOSOME_ASSEMBLY	16	-0.56	-1.37	0.065	0.306	1	5741	tags=69%, list=30%, signal=98%
												379	GOBP_CEREBRAL_CORTEX_RADIALLY_ORIENTED_CELL_MIGRATION	40	-0.49	-1.37	0.032	0.306	1	7043	tags=65%, list=37%, signal=103%
												380	GOBP_CELLULAR_RESPONSE_TO_CAMP	38	-0.49	-1.37	0.032	0.306	1	2657	tags=37%, list=14%, signal=43%
												381	GOBP_REGULATION_OF_MITOTIC_SISTER_CHROMATID_SEGREGATION	55	-0.47	-1.37	0.022	0.305	1	6277	tags=56%, list=33%, signal=84%
												382	GOBP_POSITIVE_REGULATION_OF_CALCIUM_ION_IMPORT_ACROSS_PLASMA_MEMBRANE	16	-0.57	-1.37	0.055	0.305	1	65	tags=19%, list=0%, signal=19%
												383	GOBP_RESPONSE_TO_OXYGEN_LEVELS	275	-0.44	-1.37	0	0.304	1	5378	tags=39%, list=28%, signal=53%
												384	GOBP_MUCOPOLYSACCHARIDE_METABOLIC_PROCESS	80	-0.46	-1.37	0.006	0.305	1	6718	tags=58%, list=35%, signal=88%
												385	GOBP_POSITIVE_REGULATION_OF_OSSIFICATION	64	-0.46	-1.36	0.015	0.307	1	7745	tags=70%, list=40%, signal=118%
												386	GOBP_REGULATION_OF_MEIOTIC_NUCLEAR_DIVISION	38	-0.5	-1.36	0.035	0.308	1	3341	tags=34%, list=17%, signal=41%
												387	GOBP_REGULATION_OF_PROTEIN_EXIT_FROM_ENDOPLASMIC_RETICULUM	22	-0.52	-1.36	0.052	0.307	1	2055	tags=36%, list=11%, signal=41%
												388	GOBP_REGULATION_OF_JNK_CASCADE	142	-0.45	-1.36	0.002	0.306	1	5318	tags=44%, list=28%, signal=60%
												389	GOBP_POSITIVE_REGULATION_OF_ERAD_PATHWAY	18	-0.55	-1.36	0.055	0.306	1	5245	tags=56%, list=27%, signal=76%
												390	GOBP_RESPONSE_TO_TOPOLOGICALLY_INCORRECT_PROTEIN	133	-0.45	-1.36	0.001	0.307	1	6910	tags=54%, list=36%, signal=84%
												391	GOBP_DEVELOPMENTAL_GROWTH_INVOLVED_IN_MORPHOGENESIS	287	-0.43	-1.36	0	0.307	1	7065	tags=56%, list=37%, signal=87%
												392	GOBP_POSITIVE_REGULATION_OF_TOR_SIGNALING	68	-0.46	-1.36	0.014	0.308	1	7295	tags=60%, list=38%, signal=97%
												393	GOBP_POSITIVE_REGULATION_OF_INTERLEUKIN_1_PRODUCTION	64	-0.46	-1.36	0.013	0.309	1	7897	tags=64%, list=41%, signal=109%
												394	GOBP_INTERSTRAND_CROSS_LINK_REPAIR	30	-0.51	-1.36	0.036	0.309	1	6887	tags=60%, list=36%, signal=93%
												395	GOBP_CORPUS_CALLOSUM_DEVELOPMENT	26	-0.52	-1.36	0.041	0.309	1	5609	tags=50%, list=29%, signal=71%
												396	GOBP_NEGATIVE_REGULATION_OF_VIRAL_LIFE_CYCLE	30	-0.51	-1.36	0.041	0.309	1	3801	tags=37%, list=20%, signal=46%
												397	GOBP_ANTIGEN_PROCESSING_AND_PRESENTATION_OF_ENDOGENOUS_ANTIGEN	20	-0.54	-1.36	0.058	0.308	1	7335	tags=80%, list=38%, signal=129%
												398	GOBP_POSITIVE_REGULATION_OF_RECEPTOR_RECYCLING	17	-0.55	-1.36	0.064	0.308	1	4786	tags=41%, list=25%, signal=55%
												399	GOBP_NEURONAL_ACTION_POTENTIAL	59	-0.47	-1.36	0.022	0.307	1	5741	tags=47%, list=30%, signal=68%
												400	GOBP_RESPONSE_TO_TYPE_II_INTERFERON	131	-0.45	-1.36	0.002	0.307	1	5627	tags=47%, list=29%, signal=67%
												401	GOBP_REGULATION_OF_STEM_CELL_DIVISION	15	-0.57	-1.36	0.072	0.306	1	3903	tags=47%, list=20%, signal=59%
												402	GOBP_ARTERY_DEVELOPMENT	118	-0.45	-1.36	0.002	0.307	1	7326	tags=57%, list=38%, signal=91%
												403	GOBP_PROTEIN_LOCALIZATION_TO_VACUOLE	78	-0.46	-1.36	0.007	0.306	1	6747	tags=58%, list=35%, signal=89%
												404	GOBP_UBIQUITIN_DEPENDENT_ERAD_PATHWAY	83	-0.46	-1.36	0.009	0.306	1	6852	tags=55%, list=36%, signal=86%
												405	GOBP_NUCLEAR_MEMBRANE_ORGANIZATION	32	-0.5	-1.36	0.043	0.309	1	4688	tags=44%, list=24%, signal=58%
												406	GOBP_REACTIVE_NITROGEN_SPECIES_METABOLIC_PROCESS	87	-0.46	-1.36	0.006	0.31	1	6862	tags=59%, list=36%, signal=91%
												407	GOBP_POSITIVE_REGULATION_OF_GLYCOLYTIC_PROCESS	27	-0.51	-1.36	0.05	0.309	1	6183	tags=56%, list=32%, signal=82%
												408	GOBP_POTASSIUM_ION_IMPORT_ACROSS_PLASMA_MEMBRANE	46	-0.48	-1.36	0.03	0.309	1	3480	tags=35%, list=18%, signal=42%
												409	GOBP_REGULATION_OF_NEURAL_PRECURSOR_CELL_PROLIFERATION	134	-0.45	-1.36	0.001	0.31	1	6092	tags=51%, list=32%, signal=74%
												410	GOBP_MODULATION_BY_SYMBIONT_OF_ENTRY_INTO_HOST	49	-0.48	-1.36	0.024	0.31	1	4094	tags=39%, list=21%, signal=49%
												411	GOBP_DENDRITE_MORPHOGENESIS	189	-0.44	-1.36	0	0.31	1	5576	tags=45%, list=29%, signal=63%
												412	GOBP_GLYCOLIPID_BIOSYNTHETIC_PROCESS	66	-0.46	-1.36	0.01	0.309	1	7553	tags=62%, list=39%, signal=102%
												413	GOBP_CELL_MIGRATION_INVOLVED_IN_GASTRULATION	17	-0.55	-1.36	0.067	0.309	1	6360	tags=53%, list=33%, signal=79%
												414	GOBP_AORTA_DEVELOPMENT	72	-0.46	-1.36	0.008	0.308	1	6217	tags=50%, list=32%, signal=74%
												415	GOBP_CELLULAR_RESPONSE_TO_NUTRIENT	37	-0.49	-1.36	0.032	0.31	1	6803	tags=59%, list=35%, signal=92%
												416	GOBP_REGULATION_OF_EXTENT_OF_CELL_GROWTH	128	-0.44	-1.36	0	0.309	1	7022	tags=57%, list=37%, signal=89%
												417	GOBP_PROTEIN_LOCALIZATION_TO_CONDENSED_CHROMOSOME	15	-0.57	-1.36	0.061	0.309	1	5908	tags=60%, list=31%, signal=87%
												418	GOBP_REGULATION_OF_CAMP_DEPENDENT_PROTEIN_KINASE_ACTIVITY	17	-0.54	-1.36	0.055	0.309	1	2156	tags=35%, list=11%, signal=40%
												419	GOBP_NEURAL_PRECURSOR_CELL_PROLIFERATION	221	-0.44	-1.36	0	0.31	1	6101	tags=49%, list=32%, signal=71%
												420	GOBP_NK_T_CELL_ACTIVATION	15	-0.56	-1.36	0.06	0.31	1	4962	tags=53%, list=26%, signal=72%
												421	GOBP_CELLULAR_OXIDANT_DETOXIFICATION	29	-0.51	-1.36	0.054	0.309	1	5556	tags=55%, list=29%, signal=78%
												422	GOBP_REGULATION_OF_SKELETAL_MUSCLE_CELL_PROLIFERATION	16	-0.56	-1.36	0.077	0.311	1	7108	tags=81%, list=37%, signal=129%
												423	GOBP_RESPONSE_TO_TRANSFORMING_GROWTH_FACTOR_BETA	247	-0.43	-1.35	0	0.312	1	4748	tags=40%, list=25%, signal=53%
												424	GOBP_BRANCHING_MORPHOGENESIS_OF_AN_EPITHELIAL_TUBE	194	-0.43	-1.35	0	0.312	1	7079	tags=52%, list=37%, signal=82%
												425	GOBP_GLAND_MORPHOGENESIS	157	-0.44	-1.35	0.001	0.312	1	7065	tags=54%, list=37%, signal=84%
												426	GOBP_HEART_VALVE_MORPHOGENESIS	54	-0.47	-1.35	0.035	0.312	1	7006	tags=61%, list=37%, signal=96%
												427	GOBP_PROTEIN_DEUBIQUITINATION	101	-0.45	-1.35	0.008	0.312	1	7376	tags=62%, list=38%, signal=101%
												428	GOBP_CELL_JUNCTION_DISASSEMBLY	26	-0.52	-1.35	0.05	0.313	1	3200	tags=42%, list=17%, signal=51%
												429	GOBP_REGULATION_OF_COLLATERAL_SPROUTING	23	-0.52	-1.35	0.046	0.313	1	4435	tags=48%, list=23%, signal=62%
												430	GOBP_REGULATION_OF_AUTOPHAGY	286	-0.43	-1.35	0	0.313	1	6472	tags=50%, list=34%, signal=74%
												431	GOBP_NEGATIVE_REGULATION_OF_AXONOGENESIS	71	-0.46	-1.35	0.017	0.313	1	5488	tags=49%, list=29%, signal=69%
												432	GOBP_HOMOPHILIC_CELL_ADHESION_VIA_PLASMA_MEMBRANE_ADHESION_MOLECULES	100	-0.45	-1.35	0.005	0.312	1	7718	tags=61%, list=40%, signal=102%
												433	GOBP_PEPTIDYL_L_CYSTEINE_S_PALMITOYLATION	24	-0.52	-1.35	0.047	0.312	1	6172	tags=58%, list=32%, signal=86%
												434	GOBP_PROTEASOME_MEDIATED_UBIQUITIN_DEPENDENT_PROTEIN_CATABOLIC_PROCESS	427	-0.43	-1.35	0	0.313	1	7163	tags=55%, list=37%, signal=86%
												435	GOBP_MACROAUTOPHAGY	263	-0.43	-1.35	0	0.314	1	6472	tags=52%, list=34%, signal=78%
												436	GOBP_DENDRITIC_SPINE_DEVELOPMENT	132	-0.44	-1.35	0.004	0.314	1	7017	tags=55%, list=37%, signal=87%
												437	GOBP_MEMBRANE_RAFT_ORGANIZATION	22	-0.53	-1.35	0.066	0.314	1	6002	tags=59%, list=31%, signal=86%
												438	GOBP_POTASSIUM_ION_TRANSPORT	246	-0.43	-1.35	0	0.314	1	6132	tags=47%, list=32%, signal=68%
												439	GOBP_LABYRINTHINE_LAYER_MORPHOGENESIS	27	-0.51	-1.35	0.055	0.313	1	8137	tags=74%, list=42%, signal=128%
												440	GOBP_REGULATION_OF_CELL_MATRIX_ADHESION	125	-0.45	-1.35	0.002	0.313	1	7241	tags=54%, list=38%, signal=87%
												441	GOBP_SPINDLE_CHECKPOINT_SIGNALING	51	-0.47	-1.35	0.021	0.313	1	6146	tags=53%, list=32%, signal=78%
												442	GOBP_FOREBRAIN_CELL_MIGRATION	70	-0.46	-1.35	0.017	0.313	1	7043	tags=63%, list=37%, signal=99%
												443	GOBP_AMYLOID_BETA_METABOLIC_PROCESS	54	-0.47	-1.35	0.021	0.313	1	7543	tags=65%, list=39%, signal=107%
												444	GOBP_PROTEIN_LOCALIZATION_TO_POSTSYNAPSE	67	-0.46	-1.35	0.015	0.312	1	6036	tags=51%, list=31%, signal=74%
												445	GOBP_LEARNING	186	-0.44	-1.35	0	0.312	1	5647	tags=45%, list=29%, signal=63%
												446	GOBP_REGULATION_OF_PROTEIN_LOCALIZATION_TO_NUCLEUS	160	-0.44	-1.35	0.003	0.312	1	7280	tags=60%, list=38%, signal=96%
												447	GOBP_TRANSLESION_SYNTHESIS	20	-0.53	-1.35	0.065	0.311	1	4446	tags=40%, list=23%, signal=52%
												448	GOBP_ATRIAL_CARDIAC_MUSCLE_CELL_TO_AV_NODE_CELL_COMMUNICATION	15	-0.56	-1.35	0.075	0.312	1	4164	tags=53%, list=22%, signal=68%
												449	GOBP_REGULATION_OF_RESPONSE_TO_BIOTIC_STIMULUS	495	-0.42	-1.35	0	0.312	1	7157	tags=50%, list=37%, signal=78%
												450	GOBP_VACUOLE_ORGANIZATION	217	-0.43	-1.35	0	0.311	1	6415	tags=54%, list=33%, signal=80%
												451	GOBP_REGULATION_OF_CELL_SUBSTRATE_ADHESION	224	-0.43	-1.35	0	0.311	1	5392	tags=44%, list=28%, signal=60%
												452	GOBP_EMBRYONIC_PLACENTA_DEVELOPMENT	112	-0.45	-1.35	0.004	0.31	1	7443	tags=54%, list=39%, signal=87%
												453	GOBP_MONOATOMIC_ANION_TRANSPORT	153	-0.44	-1.35	0.001	0.311	1	5306	tags=40%, list=28%, signal=55%
												454	GOBP_ANGIOGENESIS_INVOLVED_IN_WOUND_HEALING	25	-0.51	-1.35	0.062	0.31	1	6799	tags=68%, list=35%, signal=105%
												455	GOBP_VESICLE_DOCKING	64	-0.46	-1.35	0.012	0.311	1	7526	tags=64%, list=39%, signal=105%
												456	GOBP_POSITIVE_REGULATION_OF_BROWN_FAT_CELL_DIFFERENTIATION	17	-0.54	-1.35	0.074	0.312	1	6867	tags=71%, list=36%, signal=110%
												457	GOBP_PROTEIN_POLYUBIQUITINATION	237	-0.43	-1.35	0	0.311	1	6624	tags=53%, list=35%, signal=80%
												458	GOBP_ERAD_PATHWAY	107	-0.45	-1.35	0.005	0.313	1	6852	tags=53%, list=36%, signal=82%
												459	GOBP_NEGATIVE_REGULATION_OF_PHAGOCYTOSIS	26	-0.51	-1.35	0.051	0.312	1	5684	tags=54%, list=30%, signal=76%
												460	GOBP_NEGATIVE_REGULATION_OF_NUCLEOCYTOPLASMIC_TRANSPORT	28	-0.51	-1.35	0.054	0.312	1	6146	tags=54%, list=32%, signal=79%
												461	GOBP_RETINA_MORPHOGENESIS_IN_CAMERA_TYPE_EYE	81	-0.45	-1.35	0.012	0.311	1	7714	tags=63%, list=40%, signal=105%
												462	GOBP_ACTIVATION_OF_INNATE_IMMUNE_RESPONSE	252	-0.43	-1.35	0	0.312	1	7157	tags=51%, list=37%, signal=80%
												463	GOBP_POSITIVE_REGULATION_OF_GLIAL_CELL_PROLIFERATION	29	-0.49	-1.35	0.055	0.312	1	5538	tags=48%, list=29%, signal=68%
												464	GOBP_REGULATION_OF_PROTEIN_CONTAINING_COMPLEX_DISASSEMBLY	133	-0.44	-1.35	0.002	0.311	1	6617	tags=53%, list=35%, signal=81%
												465	GOBP_POSTSYNAPTIC_SPECIALIZATION_ASSEMBLY	38	-0.48	-1.35	0.056	0.311	1	2769	tags=34%, list=14%, signal=40%
												466	GOBP_REGULATION_OF_HEMATOPOIETIC_STEM_CELL_PROLIFERATION	18	-0.54	-1.35	0.07	0.311	1	4534	tags=50%, list=24%, signal=65%
												467	GOBP_IMMATURE_B_CELL_DIFFERENTIATION	20	-0.53	-1.35	0.065	0.312	1	1958	tags=25%, list=10%, signal=28%
												468	GOBP_SYNAPTIC_MEMBRANE_ADHESION	36	-0.49	-1.35	0.048	0.311	1	7514	tags=67%, list=39%, signal=109%
												469	GOBP_RENAL_FILTRATION	30	-0.5	-1.35	0.045	0.311	1	4021	tags=43%, list=21%, signal=55%
												470	GOBP_REGULATION_OF_SIGNAL_TRANSDUCTION_BY_P53_CLASS_MEDIATOR	83	-0.45	-1.34	0.013	0.31	1	7642	tags=55%, list=40%, signal=92%
												471	GOBP_LIPOSACCHARIDE_METABOLIC_PROCESS	94	-0.45	-1.34	0.014	0.31	1	7553	tags=57%, list=39%, signal=94%
												472	GOBP_AXON_EXTENSION	143	-0.44	-1.34	0.001	0.31	1	7022	tags=57%, list=37%, signal=89%
												473	GOBP_PARENTAL_BEHAVIOR	18	-0.54	-1.34	0.083	0.311	1	4064	tags=50%, list=21%, signal=63%
												474	GOBP_POSITIVE_REGULATION_OF_STRESS_ACTIVATED_PROTEIN_KINASE_SIGNALING_CASCADE	131	-0.44	-1.34	0.003	0.311	1	5646	tags=47%, list=29%, signal=67%
												475	GOBP_SERTOLI_CELL_DEVELOPMENT	22	-0.52	-1.34	0.072	0.31	1	6008	tags=45%, list=31%, signal=66%
												476	GOBP_POSITIVE_REGULATION_OF_CYCLASE_ACTIVITY	39	-0.48	-1.34	0.049	0.31	1	6340	tags=59%, list=33%, signal=88%
												477	GOBP_PURINE_NUCLEOBASE_METABOLIC_PROCESS	23	-0.52	-1.34	0.068	0.311	1	6079	tags=52%, list=32%, signal=76%
												478	GOBP_CAMP_MEDIATED_SIGNALING	67	-0.46	-1.34	0.022	0.31	1	3416	tags=37%, list=18%, signal=45%
												479	GOBP_MYOBLAST_FUSION	49	-0.47	-1.34	0.034	0.313	1	5569	tags=47%, list=29%, signal=66%
												480	GOBP_ENERGY_HOMEOSTASIS	97	-0.45	-1.34	0.01	0.313	1	5428	tags=41%, list=28%, signal=57%
												481	GOBP_CELLULAR_RESPONSE_TO_EXTERNAL_STIMULUS	301	-0.43	-1.34	0	0.312	1	6643	tags=49%, list=35%, signal=73%
												482	GOBP_ACTIN_MEDIATED_CELL_CONTRACTION	98	-0.44	-1.34	0.011	0.312	1	2566	tags=32%, list=13%, signal=36%
												483	GOBP_INORGANIC_ANION_TRANSPORT	152	-0.44	-1.34	0.002	0.312	1	6010	tags=42%, list=31%, signal=61%
												484	GOBP_CAMERA_TYPE_EYE_MORPHOGENESIS	153	-0.44	-1.34	0.003	0.311	1	7714	tags=61%, list=40%, signal=102%
												485	GOBP_REGULATION_OF_LEUKOCYTE_TETHERING_OR_ROLLING	20	-0.53	-1.34	0.073	0.312	1	2216	tags=30%, list=12%, signal=34%
												486	GOBP_TELENCEPHALON_GLIAL_CELL_MIGRATION	28	-0.5	-1.34	0.061	0.312	1	7043	tags=64%, list=37%, signal=101%
												487	GOBP_AMYLOID_PRECURSOR_PROTEIN_METABOLIC_PROCESS	73	-0.45	-1.34	0.017	0.312	1	7543	tags=63%, list=39%, signal=103%
												488	GOBP_CELL_SURFACE_PATTERN_RECOGNITION_RECEPTOR_SIGNALING_PATHWAY	66	-0.46	-1.34	0.014	0.312	1	6706	tags=52%, list=35%, signal=79%
												489	GOBP_PROTEIN_MODIFICATION_BY_SMALL_PROTEIN_REMOVAL	122	-0.44	-1.34	0.004	0.313	1	7391	tags=61%, list=39%, signal=99%
												490	GOBP_PROGRAMMED_CELL_DEATH_IN_RESPONSE_TO_REACTIVE_OXYGEN_SPECIES	18	-0.55	-1.34	0.074	0.313	1	2433	tags=39%, list=13%, signal=44%
												491	GOBP_REGULATION_OF_REACTIVE_OXYGEN_SPECIES_BIOSYNTHETIC_PROCESS	50	-0.47	-1.34	0.023	0.312	1	5663	tags=48%, list=30%, signal=68%
												492	GOBP_MECHANORECEPTOR_DIFFERENTIATION	96	-0.44	-1.34	0.013	0.313	1	6439	tags=48%, list=34%, signal=72%
												493	GOBP_MOTOR_NEURON_MIGRATION	15	-0.55	-1.34	0.092	0.313	1	2255	tags=40%, list=12%, signal=45%
												494	GOBP_REGULATION_OF_NEUROTRANSMITTER_RECEPTOR_LOCALIZATION_TO_POSTSYNAPTIC_SPECIALIZATION_MEMBRANE	19	-0.53	-1.34	0.075	0.314	1	7248	tags=74%, list=38%, signal=118%
												495	GOBP_NEGATIVE_REGULATION_OF_CYCLIN_DEPENDENT_PROTEIN_KINASE_ACTIVITY	27	-0.5	-1.34	0.063	0.314	1	4064	tags=44%, list=21%, signal=56%
												496	GOBP_MRNA_TRANSCRIPTION	50	-0.47	-1.34	0.028	0.315	1	6697	tags=58%, list=35%, signal=89%
												497	GOBP_LYTIC_VACUOLE_ORGANIZATION	97	-0.45	-1.34	0.008	0.315	1	6391	tags=57%, list=33%, signal=85%
												498	GOBP_AUTOPHAGOSOME_MATURATION	52	-0.47	-1.34	0.033	0.315	1	6378	tags=58%, list=33%, signal=86%
												499	GOBP_TRANSFORMING_GROWTH_FACTOR_BETA_RECEPTOR_SIGNALING_PATHWAY	201	-0.43	-1.34	0.001	0.315	1	4748	tags=40%, list=25%, signal=53%
												500	GOBP_SNRNA_TRANSCRIPTION_BY_RNA_POLYMERASE_II	15	-0.56	-1.34	0.079	0.315	1	5481	tags=67%, list=29%, signal=93%
												501	GOBP_POSITIVE_REGULATION_OF_PROTEIN_ACETYLATION	29	-0.5	-1.34	0.046	0.314	1	6854	tags=66%, list=36%, signal=102%
												502	GOBP_PROTEIN_HYDROXYLATION	27	-0.5	-1.34	0.065	0.314	1	5232	tags=52%, list=27%, signal=71%
												503	GOBP_MICROTUBULE_ORGANIZING_CENTER_LOCALIZATION	33	-0.49	-1.34	0.047	0.314	1	6863	tags=61%, list=36%, signal=94%
												504	GOBP_SERTOLI_CELL_DIFFERENTIATION	29	-0.5	-1.34	0.065	0.314	1	6008	tags=45%, list=31%, signal=65%
												505	GOBP_SYNAPSE_MATURATION	39	-0.48	-1.34	0.041	0.314	1	7405	tags=64%, list=39%, signal=104%
												506	GOBP_RETINAL_CONE_CELL_DIFFERENTIATION	19	-0.53	-1.34	0.069	0.313	1	2450	tags=32%, list=13%, signal=36%
												507	GOBP_SURFACTANT_HOMEOSTASIS	27	-0.5	-1.34	0.068	0.313	1	3750	tags=37%, list=20%, signal=46%
												508	GOBP_PROTEIN_K48_LINKED_UBIQUITINATION	68	-0.46	-1.34	0.022	0.314	1	7483	tags=62%, list=39%, signal=101%
												509	GOBP_DNA_SYNTHESIS_INVOLVED_IN_DNA_REPAIR	35	-0.49	-1.34	0.062	0.313	1	4748	tags=40%, list=25%, signal=53%
												510	GOBP_POSITIVE_REGULATION_OF_PROTEIN_CATABOLIC_PROCESS	201	-0.43	-1.34	0	0.313	1	7131	tags=55%, list=37%, signal=86%
												511	GOBP_POSITIVE_REGULATION_OF_ENDOTHELIAL_CELL_CHEMOTAXIS	17	-0.54	-1.34	0.071	0.313	1	3887	tags=53%, list=20%, signal=66%
												512	GOBP_REGULATION_OF_SYNAPTIC_PLASTICITY	302	-0.42	-1.33	0	0.318	1	5866	tags=39%, list=31%, signal=55%
												513	GOBP_POSITIVE_REGULATION_OF_PROTEIN_CONTAINING_COMPLEX_ASSEMBLY	207	-0.43	-1.33	0.002	0.319	1	6854	tags=49%, list=36%, signal=75%
												514	GOBP_LONG_TERM_SYNAPTIC_POTENTIATION	171	-0.43	-1.33	0	0.318	1	7592	tags=41%, list=40%, signal=67%
												515	GOBP_CARDIAC_EPITHELIAL_TO_MESENCHYMAL_TRANSITION	36	-0.48	-1.33	0.045	0.318	1	4661	tags=47%, list=24%, signal=62%
												516	GOBP_REGULATION_OF_INNATE_IMMUNE_RESPONSE	402	-0.42	-1.33	0	0.321	1	7157	tags=50%, list=37%, signal=77%
												517	GOBP_RESPONSE_TO_DECREASED_OXYGEN_LEVELS	237	-0.43	-1.33	0	0.32	1	6335	tags=46%, list=33%, signal=67%
												518	GOBP_POSITIVE_REGULATION_OF_SYNAPTIC_TRANSMISSION	258	-0.43	-1.33	0	0.32	1	7592	tags=45%, list=40%, signal=73%
												519	GOBP_MULTIVESICULAR_BODY_SORTING_PATHWAY	34	-0.49	-1.33	0.051	0.32	1	7389	tags=68%, list=39%, signal=110%
												520	GOBP_INTERFERON_MEDIATED_SIGNALING_PATHWAY	77	-0.45	-1.33	0.018	0.321	1	6740	tags=49%, list=35%, signal=76%
												521	GOBP_FAT_CELL_DIFFERENTIATION	259	-0.42	-1.33	0	0.322	1	7457	tags=53%, list=39%, signal=86%
												522	GOBP_POSITIVE_REGULATION_OF_ADENYLATE_CYCLASE_ACTIVITY	31	-0.49	-1.33	0.056	0.322	1	6340	tags=58%, list=33%, signal=87%
												523	GOBP_ACTION_POTENTIAL	156	-0.44	-1.33	0.002	0.322	1	6089	tags=47%, list=32%, signal=69%
												524	GOBP_REGULATION_OF_FAT_CELL_DIFFERENTIATION	148	-0.43	-1.33	0.002	0.322	1	6125	tags=47%, list=32%, signal=68%
												525	GOBP_REGULATION_OF_MORPHOGENESIS_OF_A_BRANCHING_STRUCTURE	66	-0.45	-1.33	0.025	0.322	1	6845	tags=50%, list=36%, signal=77%
												526	GOBP_DETERMINATION_OF_ADULT_LIFESPAN	48	-0.47	-1.33	0.033	0.322	1	6639	tags=56%, list=35%, signal=86%
												527	GOBP_L_AMINO_ACID_TRANSPORT	87	-0.45	-1.33	0.015	0.321	1	7851	tags=61%, list=41%, signal=103%
												528	GOBP_PROTEIN_TARGETING_TO_VACUOLE	45	-0.47	-1.33	0.036	0.321	1	6378	tags=58%, list=33%, signal=86%
												529	GOBP_VASCULAR_WOUND_HEALING	18	-0.54	-1.33	0.067	0.32	1	4093	tags=50%, list=21%, signal=64%
												530	GOBP_NEGATIVE_REGULATION_OF_CELL_SUBSTRATE_ADHESION	59	-0.46	-1.33	0.025	0.32	1	6617	tags=53%, list=35%, signal=80%
												531	GOBP_MAMMARY_GLAND_DUCT_MORPHOGENESIS	41	-0.48	-1.33	0.048	0.32	1	6799	tags=61%, list=35%, signal=94%
												532	GOBP_NATURAL_KILLER_CELL_PROLIFERATION	21	-0.53	-1.33	0.074	0.32	1	5334	tags=48%, list=28%, signal=66%
												533	GOBP_REGULATION_OF_EXTRACELLULAR_MATRIX_ASSEMBLY	17	-0.54	-1.33	0.084	0.32	1	6862	tags=65%, list=36%, signal=101%
												534	GOBP_FIBROBLAST_MIGRATION	70	-0.45	-1.33	0.03	0.32	1	7170	tags=54%, list=37%, signal=86%
												535	GOBP_MUSCLE_CELL_PROLIFERATION	266	-0.43	-1.33	0	0.32	1	7326	tags=53%, list=38%, signal=85%
												536	GOBP_NEUROBLAST_PROLIFERATION	97	-0.44	-1.33	0.007	0.32	1	5577	tags=45%, list=29%, signal=64%
												537	GOBP_DEMETHYLATION	51	-0.47	-1.33	0.029	0.32	1	5865	tags=51%, list=31%, signal=73%
												538	GOBP_REGULATION_OF_PROTEIN_CATABOLIC_PROCESS	356	-0.42	-1.33	0	0.32	1	7131	tags=52%, list=37%, signal=82%
												539	GOBP_AXONAL_FASCICULATION	24	-0.52	-1.33	0.06	0.32	1	7129	tags=67%, list=37%, signal=106%
												540	GOBP_OVULATION_CYCLE_PROCESS	53	-0.46	-1.33	0.029	0.32	1	7621	tags=57%, list=40%, signal=94%
												541	GOBP_TRIPARTITE_REGIONAL_SUBDIVISION	19	-0.53	-1.33	0.079	0.321	1	5676	tags=42%, list=30%, signal=60%
												542	GOBP_TRANSFORMING_GROWTH_FACTOR_BETA_PRODUCTION	40	-0.47	-1.33	0.055	0.321	1	6862	tags=63%, list=36%, signal=97%
												543	GOBP_POSITIVE_REGULATION_OF_EXTRACELLULAR_MATRIX_ORGANIZATION	30	-0.49	-1.33	0.06	0.322	1	7006	tags=53%, list=37%, signal=84%
												544	GOBP_OLIGODENDROCYTE_DEVELOPMENT	48	-0.47	-1.33	0.051	0.321	1	5647	tags=48%, list=29%, signal=68%
												545	GOBP_RESPONSE_TO_STEROL	28	-0.49	-1.33	0.077	0.321	1	2055	tags=32%, list=11%, signal=36%
												546	GOBP_POSITIVE_REGULATION_OF_BLOOD_VESSEL_ENDOTHELIAL_CELL_MIGRATION	57	-0.46	-1.33	0.031	0.321	1	7090	tags=60%, list=37%, signal=94%
												547	GOBP_CELLULAR_RESPONSE_TO_METAL_ION	181	-0.43	-1.33	0.001	0.32	1	6808	tags=48%, list=35%, signal=73%
												548	GOBP_CENTRAL_NERVOUS_SYSTEM_NEURON_AXONOGENESIS	44	-0.47	-1.33	0.052	0.32	1	5609	tags=50%, list=29%, signal=71%
												549	GOBP_ADULT_LOCOMOTORY_BEHAVIOR	110	-0.44	-1.33	0.007	0.32	1	4049	tags=35%, list=21%, signal=44%
												550	GOBP_HEART_TRABECULA_FORMATION	15	-0.55	-1.33	0.081	0.321	1	2863	tags=40%, list=15%, signal=47%
												551	GOBP_REGULATION_OF_B_CELL_PROLIFERATION	70	-0.45	-1.33	0.018	0.321	1	3458	tags=36%, list=18%, signal=43%
												552	GOBP_VASCULAR_ENDOTHELIAL_GROWTH_FACTOR_SIGNALING_PATHWAY	42	-0.47	-1.33	0.047	0.321	1	6909	tags=57%, list=36%, signal=89%
												553	GOBP_RETINA_DEVELOPMENT_IN_CAMERA_TYPE_EYE	180	-0.42	-1.33	0.002	0.32	1	7714	tags=56%, list=40%, signal=92%
												554	GOBP_MIDDLE_EAR_MORPHOGENESIS	25	-0.51	-1.33	0.077	0.32	1	4032	tags=48%, list=21%, signal=61%
												555	GOBP_REGULATION_OF_MEIOTIC_CELL_CYCLE	59	-0.46	-1.33	0.021	0.32	1	3341	tags=31%, list=17%, signal=37%
												556	GOBP_NEURON_PROJECTION_REGENERATION	65	-0.46	-1.33	0.02	0.32	1	5309	tags=51%, list=28%, signal=70%
												557	GOBP_INCLUSION_BODY_ASSEMBLY	26	-0.5	-1.33	0.067	0.32	1	4761	tags=46%, list=25%, signal=61%
												558	GOBP_INNATE_IMMUNE_RESPONSE_ACTIVATING_SIGNALING_PATHWAY	230	-0.43	-1.33	0	0.32	1	7157	tags=50%, list=37%, signal=79%
												559	GOBP_DNA_METHYLATION	42	-0.48	-1.33	0.048	0.32	1	4715	tags=40%, list=25%, signal=54%
												560	GOBP_REGULATION_OF_FATTY_ACID_BIOSYNTHETIC_PROCESS	50	-0.46	-1.32	0.039	0.321	1	4986	tags=44%, list=26%, signal=59%
												561	GOBP_MRNA_METHYLATION	17	-0.53	-1.32	0.08	0.321	1	4335	tags=47%, list=23%, signal=61%
												562	GOBP_REGULATION_OF_FIBROBLAST_MIGRATION	50	-0.47	-1.32	0.032	0.321	1	6625	tags=54%, list=35%, signal=82%
												563	GOBP_REGULATION_OF_CARDIAC_MUSCLE_CELL_CONTRACTION	38	-0.48	-1.32	0.055	0.321	1	6488	tags=61%, list=34%, signal=91%
												564	GOBP_DENDRITE_DEVELOPMENT	319	-0.42	-1.32	0	0.321	1	7718	tags=56%, list=40%, signal=92%
												565	GOBP_ATRIAL_SEPTUM_DEVELOPMENT	24	-0.5	-1.32	0.069	0.32	1	7897	tags=63%, list=41%, signal=106%
												566	GOBP_REGULATION_OF_NUCLEAR_TRANSCRIBED_MRNA_CATABOLIC_PROCESS_DEADENYLATION_DEPENDENT_DECAY	26	-0.5	-1.32	0.076	0.32	1	7014	tags=69%, list=37%, signal=109%
												567	GOBP_BIOGENIC_AMINE_METABOLIC_PROCESS	106	-0.44	-1.32	0.011	0.32	1	5051	tags=41%, list=26%, signal=55%
												568	GOBP_REGULATION_OF_VASOCONSTRICTION	88	-0.44	-1.32	0.011	0.32	1	6670	tags=53%, list=35%, signal=82%
												569	GOBP_REGULATION_OF_TOLL_LIKE_RECEPTOR_4_SIGNALING_PATHWAY	26	-0.5	-1.32	0.064	0.321	1	6652	tags=58%, list=35%, signal=88%
												570	GOBP_FIBROBLAST_APOPTOTIC_PROCESS	31	-0.49	-1.32	0.07	0.321	1	6122	tags=55%, list=32%, signal=80%
												571	GOBP_POSITIVE_REGULATION_OF_BONE_MINERALIZATION	47	-0.46	-1.32	0.041	0.32	1	7745	tags=70%, list=40%, signal=117%
												572	GOBP_NEUROMUSCULAR_PROCESS_CONTROLLING_BALANCE	70	-0.45	-1.32	0.021	0.32	1	9019	tags=66%, list=47%, signal=124%
												573	GOBP_REGULATION_OF_MYOBLAST_FUSION	24	-0.5	-1.32	0.084	0.319	1	8313	tags=71%, list=43%, signal=125%
												574	GOBP_POSITIVE_REGULATION_OF_GLYCOPROTEIN_METABOLIC_PROCESS	26	-0.51	-1.32	0.07	0.319	1	7185	tags=62%, list=37%, signal=98%
												575	GOBP_POSITIVE_REGULATION_OF_RECEPTOR_SIGNALING_PATHWAY_VIA_STAT	68	-0.45	-1.32	0.023	0.318	1	5197	tags=31%, list=27%, signal=42%
												576	GOBP_POSITIVE_REGULATION_OF_CELL_MORPHOGENESIS	64	-0.45	-1.32	0.031	0.318	1	7319	tags=58%, list=38%, signal=93%
												577	GOBP_BLOOD_VESSEL_ENDOTHELIAL_CELL_MIGRATION	123	-0.43	-1.32	0.004	0.318	1	7090	tags=57%, list=37%, signal=90%
												578	GOBP_AXIS_SPECIFICATION	101	-0.44	-1.32	0.006	0.32	1	6265	tags=50%, list=33%, signal=73%
												579	GOBP_POSTSYNAPSE_ASSEMBLY	49	-0.46	-1.32	0.043	0.32	1	2968	tags=33%, list=15%, signal=39%
												580	GOBP_LYSOSOMAL_TRANSPORT	124	-0.43	-1.32	0.007	0.32	1	6494	tags=55%, list=34%, signal=82%
												581	GOBP_CELLULAR_RESPONSE_TO_EXTRACELLULAR_STIMULUS	256	-0.42	-1.32	0	0.32	1	7298	tags=54%, list=38%, signal=85%
												582	GOBP_INORGANIC_ION_IMPORT_ACROSS_PLASMA_MEMBRANE	124	-0.44	-1.32	0.009	0.32	1	5178	tags=40%, list=27%, signal=55%
												583	GOBP_OLIGOSACCHARIDE_BIOSYNTHETIC_PROCESS	20	-0.52	-1.32	0.081	0.32	1	4092	tags=45%, list=21%, signal=57%
												584	GOBP_RESPONSE_TO_ANGIOTENSIN	31	-0.49	-1.32	0.072	0.32	1	6721	tags=55%, list=35%, signal=84%
												585	GOBP_LIPOPROTEIN_BIOSYNTHETIC_PROCESS	101	-0.44	-1.32	0.017	0.32	1	7632	tags=60%, list=40%, signal=100%
												586	GOBP_MICROTUBULE_POLYMERIZATION	88	-0.45	-1.32	0.013	0.319	1	7279	tags=57%, list=38%, signal=91%
												587	GOBP_DOPAMINE_TRANSPORT	64	-0.46	-1.32	0.03	0.319	1	3191	tags=33%, list=17%, signal=39%
												588	GOBP_GLIAL_CELL_DEVELOPMENT	135	-0.43	-1.32	0.005	0.319	1	6837	tags=53%, list=36%, signal=81%
												589	GOBP_POSITIVE_REGULATION_OF_BIOMINERAL_TISSUE_DEVELOPMENT	57	-0.46	-1.32	0.028	0.318	1	7745	tags=68%, list=40%, signal=114%
												590	GOBP_GLYCOSPHINGOLIPID_METABOLIC_PROCESS	52	-0.46	-1.32	0.045	0.318	1	6774	tags=52%, list=35%, signal=80%
												591	GOBP_REGULATION_OF_NEUROGENESIS	483	-0.41	-1.32	0.001	0.318	1	7326	tags=53%, list=38%, signal=84%
												592	GOBP_EXPLORATION_BEHAVIOR	41	-0.47	-1.32	0.056	0.317	1	7167	tags=61%, list=37%, signal=97%
												593	GOBP_EYELID_DEVELOPMENT_IN_CAMERA_TYPE_EYE	16	-0.53	-1.32	0.094	0.318	1	5566	tags=63%, list=29%, signal=88%
												594	GOBP_POSITIVE_REGULATION_OF_CELLULAR_CATABOLIC_PROCESS	329	-0.42	-1.32	0	0.318	1	7075	tags=52%, list=37%, signal=80%
												595	GOBP_REGULATION_OF_NON_CANONICAL_WNT_SIGNALING_PATHWAY	25	-0.5	-1.32	0.083	0.318	1	7505	tags=76%, list=39%, signal=125%
												596	GOBP_NEGATIVE_REGULATION_OF_AXON_EXTENSION	50	-0.46	-1.32	0.027	0.318	1	5488	tags=50%, list=29%, signal=70%
												597	GOBP_CRANIOFACIAL_SUTURE_MORPHOGENESIS	17	-0.54	-1.32	0.097	0.318	1	2816	tags=35%, list=15%, signal=41%
												598	GOBP_POSITIVE_REGULATION_OF_LYASE_ACTIVITY	40	-0.48	-1.32	0.041	0.318	1	6340	tags=55%, list=33%, signal=82%
												599	GOBP_B_CELL_PROLIFERATION	99	-0.44	-1.32	0.02	0.318	1	4166	tags=35%, list=22%, signal=45%
												600	GOBP_SECRETORY_GRANULE_LOCALIZATION	20	-0.52	-1.32	0.093	0.317	1	2914	tags=40%, list=15%, signal=47%
												601	GOBP_SPHINGOMYELIN_METABOLIC_PROCESS	22	-0.52	-1.32	0.071	0.317	1	7008	tags=64%, list=37%, signal=100%
												602	GOBP_SMOOTH_MUSCLE_CELL_PROLIFERATION	194	-0.43	-1.32	0	0.318	1	7326	tags=52%, list=38%, signal=83%
												603	GOBP_ANTERIOR_POSTERIOR_AXIS_SPECIFICATION	63	-0.46	-1.32	0.024	0.317	1	3773	tags=37%, list=20%, signal=45%
												604	GOBP_NUCLEAR_TRANSCRIBED_MRNA_CATABOLIC_PROCESS_DEADENYLATION_DEPENDENT_DECAY	60	-0.45	-1.32	0.029	0.319	1	8823	tags=68%, list=46%, signal=126%
												605	GOBP_GLUTAMATE_RECEPTOR_SIGNALING_PATHWAY	50	-0.47	-1.32	0.037	0.319	1	4199	tags=44%, list=22%, signal=56%
												606	GOBP_REGULATION_OF_DENDRITIC_SPINE_DEVELOPMENT	84	-0.44	-1.32	0.015	0.32	1	7712	tags=58%, list=40%, signal=97%
												607	GOBP_CORONARY_VASCULATURE_MORPHOGENESIS	32	-0.48	-1.32	0.055	0.319	1	7459	tags=69%, list=39%, signal=112%
												608	GOBP_ENDOSOME_TO_LYSOSOME_TRANSPORT_VIA_MULTIVESICULAR_BODY_SORTING_PATHWAY	16	-0.54	-1.32	0.109	0.32	1	5919	tags=69%, list=31%, signal=99%
												609	GOBP_INTRINSIC_APOPTOTIC_SIGNALING_PATHWAY_IN_RESPONSE_TO_OXIDATIVE_STRESS	58	-0.46	-1.32	0.029	0.319	1	6643	tags=52%, list=35%, signal=79%
												610	GOBP_MAMMARY_GLAND_EPITHELIUM_DEVELOPMENT	76	-0.45	-1.32	0.022	0.319	1	6799	tags=54%, list=35%, signal=83%
												611	GOBP_REGULATION_OF_COAGULATION	69	-0.45	-1.32	0.026	0.32	1	3430	tags=35%, list=18%, signal=42%
												612	GOBP_ESTABLISHMENT_OF_PROTEIN_LOCALIZATION_TO_VACUOLE	58	-0.45	-1.32	0.04	0.321	1	6565	tags=55%, list=34%, signal=84%
												613	GOBP_AMINOGLYCAN_METABOLIC_PROCESS	112	-0.44	-1.32	0.008	0.32	1	6807	tags=54%, list=35%, signal=83%
												614	GOBP_ESTABLISHMENT_OF_PLANAR_POLARITY_INVOLVED_IN_NEURAL_TUBE_CLOSURE	16	-0.54	-1.32	0.102	0.32	1	6581	tags=69%, list=34%, signal=105%
												615	GOBP_REGULATION_OF_MEMBRANE_LIPID_DISTRIBUTION	57	-0.45	-1.32	0.033	0.321	1	6133	tags=46%, list=32%, signal=67%
												616	GOBP_POSITIVE_REGULATION_OF_B_CELL_PROLIFERATION	46	-0.47	-1.32	0.051	0.32	1	1702	tags=26%, list=9%, signal=29%
												617	GOBP_ESTABLISHMENT_OF_MITOTIC_SPINDLE_LOCALIZATION	40	-0.47	-1.32	0.062	0.32	1	2555	tags=30%, list=13%, signal=35%
												618	GOBP_POSITIVE_REGULATION_OF_CELL_SUBSTRATE_JUNCTION_ORGANIZATION	35	-0.47	-1.31	0.074	0.321	1	7242	tags=66%, list=38%, signal=105%
												619	GOBP_CEREBRAL_CORTEX_CELL_MIGRATION	54	-0.45	-1.31	0.037	0.321	1	7043	tags=65%, list=37%, signal=102%
												620	GOBP_PROCESS_UTILIZING_AUTOPHAGIC_MECHANISM	484	-0.41	-1.31	0	0.321	1	6425	tags=49%, list=34%, signal=72%
												621	GOBP_OLFACTORY_BULB_INTERNEURON_DIFFERENTIATION	16	-0.54	-1.31	0.092	0.321	1	5449	tags=56%, list=28%, signal=79%
												622	GOBP_GPI_ANCHOR_METABOLIC_PROCESS	34	-0.48	-1.31	0.067	0.32	1	7553	tags=65%, list=39%, signal=107%
												623	GOBP_VESICLE_TARGETING	59	-0.45	-1.31	0.036	0.32	1	7584	tags=66%, list=40%, signal=109%
												624	GOBP_STRIATUM_DEVELOPMENT	18	-0.53	-1.31	0.088	0.319	1	2890	tags=39%, list=15%, signal=46%
												625	GOBP_CARDIAC_MUSCLE_CELL_ACTION_POTENTIAL_INVOLVED_IN_CONTRACTION	43	-0.47	-1.31	0.05	0.319	1	6488	tags=51%, list=34%, signal=77%
												626	GOBP_GLUCOSAMINE_CONTAINING_COMPOUND_METABOLIC_PROCESS	24	-0.5	-1.31	0.079	0.319	1	3348	tags=38%, list=17%, signal=45%
												627	GOBP_NEGATIVE_REGULATION_OF_DEFENSE_RESPONSE_TO_VIRUS	48	-0.46	-1.31	0.037	0.319	1	5886	tags=48%, list=31%, signal=69%
												628	GOBP_REGULATION_OF_AXONOGENESIS	185	-0.42	-1.31	0.001	0.319	1	7326	tags=55%, list=38%, signal=87%
												629	GOBP_POSITIVE_REGULATION_OF_CELL_PROJECTION_ORGANIZATION	449	-0.41	-1.31	0	0.318	1	7431	tags=52%, list=39%, signal=83%
												630	GOBP_ZINC_ION_TRANSPORT	31	-0.48	-1.31	0.065	0.318	1	5858	tags=58%, list=31%, signal=83%
												631	GOBP_AMYLOID_PRECURSOR_PROTEIN_CATABOLIC_PROCESS	58	-0.45	-1.31	0.039	0.318	1	7543	tags=62%, list=39%, signal=102%
												632	GOBP_MEMBRANE_REPOLARIZATION_DURING_ACTION_POTENTIAL	20	-0.52	-1.31	0.088	0.318	1	5860	tags=55%, list=31%, signal=79%
												633	GOBP_NEGATIVE_REGULATION_OF_ANOIKIS	15	-0.54	-1.31	0.082	0.318	1	4518	tags=60%, list=24%, signal=78%
												634	GOBP_REGULATION_OF_BROWN_FAT_CELL_DIFFERENTIATION	27	-0.5	-1.31	0.07	0.318	1	6867	tags=63%, list=36%, signal=98%
												635	GOBP_STRESS_ACTIVATED_PROTEIN_KINASE_SIGNALING_CASCADE	247	-0.42	-1.31	0.001	0.317	1	5538	tags=44%, list=29%, signal=61%
												636	GOBP_PALLIUM_DEVELOPMENT	175	-0.43	-1.31	0.002	0.317	1	7730	tags=60%, list=40%, signal=100%
												637	GOBP_REGULATION_OF_NITRIC_OXIDE_METABOLIC_PROCESS	71	-0.44	-1.31	0.031	0.317	1	6862	tags=55%, list=36%, signal=85%
												638	GOBP_MUSCLE_CELL_APOPTOTIC_PROCESS	115	-0.43	-1.31	0.011	0.317	1	5372	tags=40%, list=28%, signal=55%
												639	GOBP_PULMONARY_VALVE_MORPHOGENESIS	19	-0.52	-1.31	0.075	0.318	1	6831	tags=74%, list=36%, signal=114%
												640	GOBP_CELL_SUBSTRATE_ADHESION	360	-0.41	-1.31	0	0.318	1	6656	tags=48%, list=35%, signal=72%
												641	GOBP_LOCOMOTORY_BEHAVIOR	268	-0.42	-1.31	0.001	0.317	1	6423	tags=46%, list=33%, signal=69%
												642	GOBP_POSITIVE_REGULATION_OF_MACROPHAGE_MIGRATION	30	-0.49	-1.31	0.063	0.318	1	6530	tags=57%, list=34%, signal=86%
												643	GOBP_REGULATION_OF_GLIAL_CELL_APOPTOTIC_PROCESS	15	-0.54	-1.31	0.101	0.317	1	3946	tags=47%, list=21%, signal=59%
												644	GOBP_CARDIAC_MUSCLE_CELL_MEMBRANE_REPOLARIZATION	31	-0.49	-1.31	0.076	0.317	1	5178	tags=45%, list=27%, signal=62%
												645	GOBP_CELL_MATRIX_ADHESION	228	-0.42	-1.31	0.001	0.317	1	5590	tags=41%, list=29%, signal=57%
												646	GOBP_VESICLE_TETHERING	31	-0.48	-1.31	0.08	0.319	1	7584	tags=68%, list=40%, signal=112%
												647	GOBP_SPLEEN_DEVELOPMENT	48	-0.46	-1.31	0.05	0.319	1	4838	tags=44%, list=25%, signal=58%
												648	GOBP_POST_GOLGI_VESICLE_MEDIATED_TRANSPORT	96	-0.44	-1.31	0.016	0.319	1	7556	tags=61%, list=39%, signal=101%
												649	GOBP_LABYRINTHINE_LAYER_DEVELOPMENT	59	-0.46	-1.31	0.031	0.319	1	8137	tags=64%, list=42%, signal=112%
												650	GOBP_REGULATION_OF_POSTSYNAPTIC_MEMBRANE_NEUROTRANSMITTER_RECEPTOR_LEVELS	132	-0.43	-1.31	0.011	0.32	1	7521	tags=58%, list=39%, signal=95%
												651	GOBP_EPITHELIAL_CELL_DIFFERENTIATION_INVOLVED_IN_KIDNEY_DEVELOPMENT	40	-0.47	-1.31	0.071	0.319	1	3670	tags=30%, list=19%, signal=37%
												652	GOBP_REGULATION_OF_NEUROTROPHIN_TRK_RECEPTOR_SIGNALING_PATHWAY	17	-0.53	-1.31	0.094	0.32	1	2232	tags=35%, list=12%, signal=40%
												653	GOBP_HINDLIMB_MORPHOGENESIS	47	-0.46	-1.31	0.056	0.319	1	6022	tags=53%, list=31%, signal=77%
												654	GOBP_NEGATIVE_REGULATION_OF_PROTEIN_LOCALIZATION_TO_NUCLEUS	44	-0.46	-1.31	0.061	0.319	1	6675	tags=64%, list=35%, signal=97%
												655	GOBP_POSITIVE_REGULATION_OF_INTERFERON_ALPHA_PRODUCTION	28	-0.48	-1.31	0.077	0.319	1	2582	tags=29%, list=13%, signal=33%
												656	GOBP_ENDOPLASMIC_RETICULUM_CALCIUM_ION_HOMEOSTASIS	28	-0.5	-1.31	0.088	0.319	1	5245	tags=50%, list=27%, signal=69%
												657	GOBP_REGENERATION	161	-0.43	-1.31	0.006	0.319	1	7108	tags=55%, list=37%, signal=86%
												658	GOBP_REGULATION_OF_RIG_I_SIGNALING_PATHWAY	17	-0.53	-1.31	0.094	0.319	1	5527	tags=59%, list=29%, signal=83%
												659	GOBP_CYTOPLASMIC_TRANSLATIONAL_INITIATION	25	-0.5	-1.31	0.09	0.319	1	6211	tags=60%, list=32%, signal=89%
												660	GOBP_CATECHOL_CONTAINING_COMPOUND_BIOSYNTHETIC_PROCESS	27	-0.5	-1.31	0.078	0.319	1	3558	tags=37%, list=19%, signal=45%
												661	GOBP_VIRAL_GENOME_REPLICATION	112	-0.43	-1.31	0.014	0.318	1	7579	tags=57%, list=40%, signal=94%
												662	GOBP_DETECTION_OF_MECHANICAL_STIMULUS	70	-0.45	-1.31	0.016	0.318	1	3368	tags=30%, list=18%, signal=36%
												663	GOBP_CELLULAR_RESPONSE_TO_CORTICOSTEROID_STIMULUS	57	-0.45	-1.31	0.043	0.319	1	2299	tags=25%, list=12%, signal=28%
												664	GOBP_AMINO_SUGAR_METABOLIC_PROCESS	43	-0.47	-1.31	0.051	0.318	1	3547	tags=37%, list=18%, signal=46%
												665	GOBP_REGULATION_OF_SYNAPSE_MATURATION	23	-0.5	-1.31	0.088	0.318	1	3108	tags=39%, list=16%, signal=47%
												666	GOBP_REGULATION_OF_OXIDATIVE_STRESS_INDUCED_INTRINSIC_APOPTOTIC_SIGNALING_PATHWAY	38	-0.47	-1.31	0.074	0.318	1	5745	tags=45%, list=30%, signal=64%
												667	GOBP_LIPOPROTEIN_METABOLIC_PROCESS	135	-0.43	-1.31	0.004	0.318	1	7007	tags=53%, list=37%, signal=83%
												668	GOBP_CELL_PROLIFERATION_INVOLVED_IN_HEART_MORPHOGENESIS	23	-0.51	-1.31	0.088	0.318	1	4137	tags=43%, list=22%, signal=55%
												669	GOBP_REGULATION_OF_CENTROSOME_CYCLE	52	-0.45	-1.31	0.052	0.317	1	4748	tags=44%, list=25%, signal=59%
												670	GOBP_FAT_SOLUBLE_VITAMIN_METABOLIC_PROCESS	35	-0.47	-1.31	0.075	0.317	1	6020	tags=49%, list=31%, signal=71%
												671	GOBP_REGULATION_OF_TISSUE_REMODELING	87	-0.44	-1.31	0.021	0.316	1	3191	tags=31%, list=17%, signal=37%
												672	GOBP_EMBRYONIC_AXIS_SPECIFICATION	46	-0.47	-1.31	0.04	0.316	1	6171	tags=48%, list=32%, signal=70%
												673	GOBP_REGULATION_OF_MEMBRANE_PROTEIN_ECTODOMAIN_PROTEOLYSIS	23	-0.51	-1.31	0.09	0.316	1	7219	tags=61%, list=38%, signal=97%
												674	GOBP_MOTOR_BEHAVIOR	26	-0.49	-1.31	0.07	0.316	1	6391	tags=62%, list=33%, signal=92%
												675	GOBP_REGULATION_OF_BONE_REMODELING	64	-0.45	-1.31	0.036	0.316	1	6231	tags=47%, list=32%, signal=69%
												676	GOBP_SUBPALLIUM_DEVELOPMENT	24	-0.5	-1.31	0.089	0.316	1	7423	tags=63%, list=39%, signal=102%
												677	GOBP_PEPTIDYL_CYSTEINE_MODIFICATION	48	-0.46	-1.31	0.046	0.315	1	7700	tags=60%, list=40%, signal=101%
												678	GOBP_POSITIVE_REGULATION_OF_MICROTUBULE_POLYMERIZATION_OR_DEPOLYMERIZATION	35	-0.48	-1.31	0.067	0.315	1	6385	tags=51%, list=33%, signal=77%
												679	GOBP_POST_EMBRYONIC_DEVELOPMENT	127	-0.43	-1.31	0.01	0.315	1	7630	tags=56%, list=40%, signal=92%
												680	GOBP_EYE_MORPHOGENESIS	182	-0.42	-1.31	0.003	0.315	1	7714	tags=59%, list=40%, signal=97%
												681	GOBP_ENDOTHELIAL_CELL_MORPHOGENESIS	15	-0.54	-1.31	0.115	0.316	1	4402	tags=47%, list=23%, signal=61%
												682	GOBP_MITOTIC_SISTER_CHROMATID_SEPARATION	60	-0.45	-1.31	0.03	0.316	1	6146	tags=52%, list=32%, signal=76%
												683	GOBP_VITAMIN_METABOLIC_PROCESS	90	-0.44	-1.31	0.015	0.316	1	6233	tags=46%, list=33%, signal=67%
												684	GOBP_CARDIAC_MUSCLE_CELL_ACTION_POTENTIAL	59	-0.45	-1.31	0.043	0.316	1	6488	tags=51%, list=34%, signal=77%
												685	GOBP_IRE1_MEDIATED_UNFOLDED_PROTEIN_RESPONSE	15	-0.54	-1.31	0.11	0.317	1	7847	tags=80%, list=41%, signal=135%
												686	GOBP_NEUROINFLAMMATORY_RESPONSE	80	-0.44	-1.31	0.027	0.316	1	6163	tags=51%, list=32%, signal=75%
												687	GOBP_ENDOSOME_ORGANIZATION	66	-0.44	-1.3	0.042	0.318	1	6198	tags=53%, list=32%, signal=78%
												688	GOBP_REGULATION_OF_NEUROTRANSMITTER_SECRETION	103	-0.43	-1.3	0.018	0.318	1	7462	tags=59%, list=39%, signal=96%
												689	GOBP_POSITIVE_REGULATION_OF_PROTEIN_LOCALIZATION_TO_CELL_SURFACE	24	-0.5	-1.3	0.094	0.318	1	6026	tags=54%, list=31%, signal=79%
												690	GOBP_POSITIVE_REGULATION_OF_SKELETAL_MUSCLE_TISSUE_DEVELOPMENT	24	-0.5	-1.3	0.095	0.318	1	5407	tags=54%, list=28%, signal=75%
												691	GOBP_AMINO_ACID_TRANSMEMBRANE_TRANSPORT	99	-0.44	-1.3	0.014	0.318	1	7851	tags=59%, list=41%, signal=99%
												692	GOBP_CEREBRAL_CORTEX_DEVELOPMENT	120	-0.43	-1.3	0.009	0.317	1	7425	tags=60%, list=39%, signal=97%
												693	GOBP_AMINE_BIOSYNTHETIC_PROCESS	41	-0.47	-1.3	0.075	0.317	1	4976	tags=41%, list=26%, signal=56%
												694	GOBP_RESPONSE_TO_ENDOPLASMIC_RETICULUM_STRESS	262	-0.41	-1.3	0	0.318	1	6910	tags=50%, list=36%, signal=78%
												695	GOBP_REGULATION_OF_RENAL_SYSTEM_PROCESS	23	-0.5	-1.3	0.097	0.318	1	2566	tags=39%, list=13%, signal=45%
												696	GOBP_EPIBOLY	35	-0.47	-1.3	0.058	0.317	1	5950	tags=51%, list=31%, signal=74%
												697	GOBP_NEGATIVE_REGULATION_OF_INTRINSIC_APOPTOTIC_SIGNALING_PATHWAY_IN_RESPONSE_TO_DNA_DAMAGE	26	-0.49	-1.3	0.088	0.317	1	2399	tags=27%, list=13%, signal=31%
												698	GOBP_GLIOGENESIS	390	-0.41	-1.3	0	0.317	1	7313	tags=55%, list=38%, signal=86%
												699	GOBP_RESPONSE_TO_ATP	30	-0.48	-1.3	0.08	0.317	1	6063	tags=47%, list=32%, signal=68%
												700	GOBP_RESPONSE_TO_INTERFERON_ALPHA	25	-0.5	-1.3	0.095	0.317	1	2853	tags=36%, list=15%, signal=42%
												701	GOBP_POSITIVE_REGULATION_OF_APOPTOTIC_SIGNALING_PATHWAY	169	-0.42	-1.3	0.004	0.317	1	6685	tags=49%, list=35%, signal=74%
												702	GOBP_VIRAL_GENE_EXPRESSION	74	-0.44	-1.3	0.028	0.317	1	5969	tags=49%, list=31%, signal=70%
												703	GOBP_SYNAPTIC_VESICLE_EXOCYTOSIS	114	-0.43	-1.3	0.008	0.317	1	7502	tags=58%, list=39%, signal=95%
												704	GOBP_INTRACELLULAR_RECEPTOR_SIGNALING_PATHWAY	311	-0.41	-1.3	0	0.317	1	7141	tags=51%, list=37%, signal=81%
												705	GOBP_POSITIVE_REGULATION_OF_DENDRITIC_SPINE_MORPHOGENESIS	28	-0.49	-1.3	0.084	0.317	1	7712	tags=64%, list=40%, signal=107%
												706	GOBP_POSITIVE_REGULATION_OF_REPRODUCTIVE_PROCESS	107	-0.43	-1.3	0.019	0.317	1	3693	tags=32%, list=19%, signal=39%
												707	GOBP_PEPTIDYL_TYROSINE_AUTOPHOSPHORYLATION	26	-0.49	-1.3	0.075	0.317	1	7170	tags=65%, list=37%, signal=104%
												708	GOBP_NATURAL_KILLER_CELL_DIFFERENTIATION	35	-0.47	-1.3	0.07	0.317	1	8435	tags=69%, list=44%, signal=122%
												709	GOBP_DETECTION_OF_TEMPERATURE_STIMULUS	30	-0.48	-1.3	0.089	0.316	1	1553	tags=30%, list=8%, signal=33%
												710	GOBP_POSITIVE_REGULATION_OF_SIGNAL_TRANSDUCTION_BY_P53_CLASS_MEDIATOR	32	-0.48	-1.3	0.066	0.318	1	7112	tags=56%, list=37%, signal=89%
												711	GOBP_TRANSITION_METAL_ION_TRANSPORT	100	-0.43	-1.3	0.02	0.317	1	6899	tags=54%, list=36%, signal=84%
												712	GOBP_NEGATIVE_REGULATION_OF_CELL_JUNCTION_ASSEMBLY	35	-0.48	-1.3	0.067	0.317	1	6632	tags=51%, list=35%, signal=78%
												713	GOBP_REGULATION_OF_SYNAPSE_STRUCTURE_OR_ACTIVITY	311	-0.41	-1.3	0	0.317	1	5197	tags=41%, list=27%, signal=56%
												714	GOBP_NEGATIVE_REGULATION_OF_BMP_SIGNALING_PATHWAY	59	-0.45	-1.3	0.045	0.317	1	6122	tags=51%, list=32%, signal=74%
												715	GOBP_ESTABLISHMENT_OF_TISSUE_POLARITY	65	-0.44	-1.3	0.038	0.317	1	6581	tags=57%, list=34%, signal=86%
												716	GOBP_IMPORT_INTO_NUCLEUS	181	-0.42	-1.3	0.003	0.317	1	6816	tags=51%, list=36%, signal=79%
												717	GOBP_COLLATERAL_SPROUTING	33	-0.48	-1.3	0.075	0.316	1	6784	tags=58%, list=35%, signal=89%
												718	GOBP_MRNA_3_END_PROCESSING	52	-0.45	-1.3	0.055	0.316	1	7838	tags=62%, list=41%, signal=104%
												719	GOBP_CELLULAR_RESPONSE_TO_MECHANICAL_STIMULUS	46	-0.46	-1.3	0.054	0.316	1	6457	tags=41%, list=34%, signal=62%
												720	GOBP_POSITIVE_REGULATION_OF_NEURAL_PRECURSOR_CELL_PROLIFERATION	81	-0.44	-1.3	0.027	0.317	1	5976	tags=48%, list=31%, signal=70%
												721	GOBP_PROTEIN_QUALITY_CONTROL_FOR_MISFOLDED_OR_INCOMPLETELY_SYNTHESIZED_PROTEINS	28	-0.48	-1.3	0.086	0.317	1	6649	tags=57%, list=35%, signal=87%
												722	GOBP_REGULATION_OF_MEMBRANE_REPOLARIZATION	35	-0.47	-1.3	0.091	0.317	1	2121	tags=29%, list=11%, signal=32%
												723	GOBP_NEGATIVE_REGULATION_OF_VASCULATURE_DEVELOPMENT	109	-0.43	-1.3	0.013	0.317	1	6828	tags=52%, list=36%, signal=81%
												724	GOBP_NEGATIVE_REGULATION_OF_ACTIN_FILAMENT_BUNDLE_ASSEMBLY	39	-0.47	-1.3	0.069	0.317	1	4709	tags=46%, list=25%, signal=61%
												725	GOBP_DEVELOPMENTAL_PIGMENTATION	54	-0.45	-1.3	0.044	0.317	1	4518	tags=44%, list=24%, signal=58%
												726	GOBP_DOPAMINE_BIOSYNTHETIC_PROCESS	16	-0.54	-1.3	0.1	0.316	1	2968	tags=38%, list=15%, signal=44%
												727	GOBP_MITOCHONDRIAL_FISSION	48	-0.46	-1.3	0.056	0.316	1	7344	tags=60%, list=38%, signal=98%
												728	GOBP_PROTEIN_LOCALIZATION_TO_SYNAPSE	99	-0.43	-1.3	0.015	0.316	1	7563	tags=55%, list=39%, signal=90%
												729	GOBP_POSTSYNAPTIC_DENSITY_ASSEMBLY	27	-0.49	-1.3	0.083	0.317	1	2601	tags=33%, list=14%, signal=39%
												730	GOBP_NEGATIVE_REGULATION_OF_AMIDE_METABOLIC_PROCESS	212	-0.42	-1.3	0.004	0.317	1	7141	tags=50%, list=37%, signal=78%
												731	GOBP_REGULATION_OF_GLIAL_CELL_PROLIFERATION	55	-0.45	-1.3	0.042	0.317	1	7649	tags=60%, list=40%, signal=100%
												732	GOBP_NEGATIVE_REGULATION_OF_PROTEIN_CATABOLIC_PROCESS	112	-0.43	-1.3	0.015	0.317	1	7244	tags=54%, list=38%, signal=86%
												733	GOBP_VIRAL_PROCESS	302	-0.41	-1.3	0	0.317	1	6367	tags=46%, list=33%, signal=68%
												734	GOBP_SEMI_LUNAR_VALVE_DEVELOPMENT	40	-0.47	-1.3	0.064	0.318	1	7326	tags=65%, list=38%, signal=105%
												735	GOBP_REGULATION_OF_CELL_MIGRATION_INVOLVED_IN_SPROUTING_ANGIOGENESIS	39	-0.46	-1.3	0.079	0.318	1	2443	tags=31%, list=13%, signal=35%
												736	GOBP_VESICLE_DOCKING_INVOLVED_IN_EXOCYTOSIS	45	-0.46	-1.3	0.058	0.319	1	7526	tags=69%, list=39%, signal=113%
												737	GOBP_REGULATION_OF_CARDIAC_MUSCLE_CELL_PROLIFERATION	49	-0.46	-1.3	0.043	0.32	1	4250	tags=43%, list=22%, signal=55%
												738	GOBP_PIGMENT_CELL_DIFFERENTIATION	39	-0.46	-1.3	0.063	0.319	1	4518	tags=46%, list=24%, signal=60%
												739	GOBP_STRIATED_MUSCLE_CELL_PROLIFERATION	83	-0.44	-1.3	0.022	0.319	1	5081	tags=46%, list=26%, signal=62%
												740	GOBP_REGULATION_OF_ANIMAL_ORGAN_MORPHOGENESIS	133	-0.42	-1.3	0.008	0.319	1	6646	tags=51%, list=35%, signal=78%
												741	GOBP_XENOPHAGY	15	-0.54	-1.3	0.106	0.318	1	4795	tags=60%, list=25%, signal=80%
												742	GOBP_NEGATIVE_REGULATION_OF_STEM_CELL_DIFFERENTIATION	30	-0.48	-1.3	0.088	0.318	1	5822	tags=53%, list=30%, signal=76%
												743	GOBP_REGULATION_OF_PROTEIN_LOCALIZATION_TO_SYNAPSE	29	-0.49	-1.3	0.083	0.318	1	7248	tags=66%, list=38%, signal=105%
												744	GOBP_POSITIVE_REGULATION_OF_PROTEIN_LOCALIZATION_TO_NUCLEUS	101	-0.43	-1.3	0.015	0.318	1	7735	tags=61%, list=40%, signal=102%
												745	GOBP_OLFACTORY_LOBE_DEVELOPMENT	45	-0.46	-1.3	0.065	0.318	1	7796	tags=64%, list=41%, signal=108%
												746	GOBP_CENTRAL_NERVOUS_SYSTEM_NEURON_DEVELOPMENT	95	-0.43	-1.3	0.017	0.317	1	6428	tags=52%, list=34%, signal=77%
												747	GOBP_NEGATIVE_REGULATION_OF_CELLULAR_RESPONSE_TO_HYPOXIA	17	-0.53	-1.3	0.099	0.317	1	3510	tags=41%, list=18%, signal=50%
												748	GOBP_LIMBIC_SYSTEM_DEVELOPMENT	112	-0.43	-1.3	0.01	0.318	1	8635	tags=67%, list=45%, signal=121%
												749	GOBP_CYTOKINE_PRODUCTION_INVOLVED_IN_INFLAMMATORY_RESPONSE	66	-0.44	-1.3	0.036	0.317	1	5238	tags=39%, list=27%, signal=54%
												750	GOBP_GLUTAMINE_FAMILY_AMINO_ACID_METABOLIC_PROCESS	68	-0.44	-1.3	0.029	0.317	1	6468	tags=49%, list=34%, signal=73%
												751	GOBP_PROTEIN_DEGLYCOSYLATION	15	-0.54	-1.29	0.104	0.32	1	5630	tags=60%, list=29%, signal=85%
												752	GOBP_PHOSPHOLIPID_BIOSYNTHETIC_PROCESS	219	-0.42	-1.29	0	0.319	1	7184	tags=53%, list=37%, signal=84%
												753	GOBP_FEMALE_SEX_DIFFERENTIATION	140	-0.42	-1.29	0.012	0.32	1	7750	tags=55%, list=40%, signal=92%
												754	GOBP_RETROGRADE_TRANSPORT_ENDOSOME_TO_GOLGI	88	-0.43	-1.29	0.026	0.32	1	5851	tags=52%, list=31%, signal=75%
												755	GOBP_POSITIVE_REGULATION_OF_MUSCLE_TISSUE_DEVELOPMENT	29	-0.48	-1.29	0.089	0.32	1	7409	tags=66%, list=39%, signal=107%
												756	GOBP_BLOOD_VESSEL_REMODELING	61	-0.44	-1.29	0.052	0.32	1	7601	tags=52%, list=40%, signal=87%
												757	GOBP_REGULATION_OF_CELL_SIZE	220	-0.42	-1.29	0.003	0.319	1	7022	tags=53%, list=37%, signal=82%
												758	GOBP_VASCULAR_ENDOTHELIAL_GROWTH_FACTOR_RECEPTOR_SIGNALING_PATHWAY	50	-0.45	-1.29	0.057	0.32	1	3849	tags=40%, list=20%, signal=50%
												759	GOBP_SERINE_FAMILY_AMINO_ACID_BIOSYNTHETIC_PROCESS	15	-0.54	-1.29	0.114	0.321	1	6847	tags=67%, list=36%, signal=104%
												760	GOBP_REGULATION_OF_GONAD_DEVELOPMENT	18	-0.52	-1.29	0.108	0.321	1	1812	tags=22%, list=9%, signal=25%
												761	GOBP_POSITIVE_REGULATION_OF_RELEASE_OF_SEQUESTERED_CALCIUM_ION_INTO_CYTOSOL	39	-0.46	-1.29	0.081	0.321	1	2485	tags=31%, list=13%, signal=35%
												762	GOBP_POSTSYNAPSE_ORGANIZATION	249	-0.41	-1.29	0.002	0.321	1	7604	tags=56%, list=40%, signal=91%
												763	GOBP_PEPTIDYL_THREONINE_DEPHOSPHORYLATION	15	-0.53	-1.29	0.124	0.321	1	4645	tags=53%, list=24%, signal=70%
												764	GOBP_PROGRAMMED_NECROTIC_CELL_DEATH	49	-0.45	-1.29	0.037	0.321	1	2690	tags=31%, list=14%, signal=36%
												765	GOBP_GLYCOSYLATION	217	-0.41	-1.29	0.001	0.321	1	7186	tags=55%, list=37%, signal=87%
												766	GOBP_REGULATION_OF_BIOLOGICAL_PROCESS_INVOLVED_IN_SYMBIOTIC_INTERACTION	59	-0.45	-1.29	0.043	0.32	1	4094	tags=36%, list=21%, signal=45%
												767	GOBP_VASCULOGENESIS	98	-0.44	-1.29	0.014	0.32	1	7601	tags=57%, list=40%, signal=94%
												768	GOBP_GLIAL_CELL_ACTIVATION	56	-0.45	-1.29	0.051	0.32	1	6145	tags=54%, list=32%, signal=79%
												769	GOBP_REGULATION_OF_VIRAL_PROCESS	162	-0.42	-1.29	0.007	0.32	1	6367	tags=46%, list=33%, signal=69%
												770	GOBP_RNA_DECAPPING	18	-0.51	-1.29	0.112	0.32	1	8823	tags=83%, list=46%, signal=154%
												771	GOBP_POSITIVE_REGULATION_OF_NITRIC_OXIDE_METABOLIC_PROCESS	48	-0.46	-1.29	0.055	0.32	1	6862	tags=56%, list=36%, signal=87%
												772	GOBP_CELLULAR_RESPONSE_TO_KETONE	125	-0.42	-1.29	0.012	0.32	1	6557	tags=38%, list=34%, signal=57%
												773	GOBP_REGULATION_OF_STORE_OPERATED_CALCIUM_ENTRY	19	-0.51	-1.29	0.101	0.321	1	5011	tags=42%, list=26%, signal=57%
												774	GOBP_RIBONUCLEOSIDE_DIPHOSPHATE_METABOLIC_PROCESS	24	-0.5	-1.29	0.096	0.321	1	4500	tags=42%, list=23%, signal=54%
												775	GOBP_MODULATION_BY_HOST_OF_VIRAL_PROCESS	45	-0.45	-1.29	0.07	0.322	1	7579	tags=64%, list=40%, signal=106%
												776	GOBP_CALCIUM_ION_REGULATED_EXOCYTOSIS_OF_NEUROTRANSMITTER	25	-0.49	-1.29	0.087	0.322	1	5741	tags=56%, list=30%, signal=80%
												777	GOBP_CELLULAR_RESPONSE_TO_SALT	190	-0.42	-1.29	0.002	0.321	1	6799	tags=46%, list=35%, signal=71%
												778	GOBP_TOR_SIGNALING	168	-0.42	-1.29	0.002	0.321	1	7361	tags=57%, list=38%, signal=91%
												779	GOBP_EXTRACELLULAR_STRUCTURE_ORGANIZATION	318	-0.41	-1.29	0.002	0.321	1	5459	tags=41%, list=28%, signal=56%
												780	GOBP_RESPONSE_TO_INTERFERON_BETA	48	-0.45	-1.29	0.057	0.321	1	2651	tags=29%, list=14%, signal=34%
												781	GOBP_TORC1_SIGNALING	94	-0.43	-1.29	0.025	0.321	1	7361	tags=60%, list=38%, signal=96%
												782	GOBP_SKELETAL_MUSCLE_TISSUE_REGENERATION	47	-0.45	-1.29	0.056	0.322	1	7108	tags=53%, list=37%, signal=84%
												783	GOBP_ESTABLISHMENT_OR_MAINTENANCE_OF_CELL_POLARITY	229	-0.41	-1.29	0.002	0.322	1	7304	tags=53%, list=38%, signal=85%
												784	GOBP_MEMBRANE_LIPID_BIOSYNTHETIC_PROCESS	132	-0.42	-1.29	0.014	0.322	1	7553	tags=56%, list=39%, signal=92%
												785	GOBP_BONE_RESORPTION	81	-0.44	-1.29	0.024	0.322	1	3170	tags=31%, list=17%, signal=37%
												786	GOBP_REGULATION_OF_SYNAPSE_ASSEMBLY	141	-0.42	-1.29	0.005	0.321	1	6086	tags=47%, list=32%, signal=68%
												787	GOBP_HEMOGLOBIN_BIOSYNTHETIC_PROCESS	15	-0.53	-1.29	0.101	0.321	1	6828	tags=67%, list=36%, signal=103%
												788	GOBP_ASSOCIATIVE_LEARNING	118	-0.42	-1.29	0.016	0.321	1	5647	tags=42%, list=29%, signal=60%
												789	GOBP_NEURON_PROJECTION_ORGANIZATION	116	-0.42	-1.29	0.019	0.321	1	5647	tags=46%, list=29%, signal=64%
												790	GOBP_AMINO_ACID_IMPORT_ACROSS_PLASMA_MEMBRANE	55	-0.45	-1.29	0.06	0.321	1	5357	tags=51%, list=28%, signal=70%
												791	GOBP_TERPENOID_METABOLIC_PROCESS	67	-0.44	-1.29	0.039	0.321	1	4900	tags=43%, list=26%, signal=58%
												792	GOBP_ECTODERMAL_PLACODE_DEVELOPMENT	18	-0.52	-1.29	0.105	0.321	1	3773	tags=33%, list=20%, signal=41%
												793	GOBP_PROTEIN_LOCALIZATION_TO_CELL_SURFACE	71	-0.44	-1.29	0.034	0.321	1	6265	tags=51%, list=33%, signal=75%
												794	GOBP_FC_RECEPTOR_MEDIATED_STIMULATORY_SIGNALING_PATHWAY	16	-0.52	-1.29	0.112	0.321	1	6092	tags=63%, list=32%, signal=92%
												795	GOBP_GOLGI_TO_PLASMA_MEMBRANE_TRANSPORT	57	-0.44	-1.29	0.051	0.323	1	7526	tags=60%, list=39%, signal=98%
												796	GOBP_ENSHEATHMENT_OF_NEURONS	179	-0.42	-1.29	0.005	0.323	1	6473	tags=50%, list=34%, signal=74%
												797	GOBP_LAMELLIPODIUM_ASSEMBLY	73	-0.44	-1.29	0.042	0.322	1	5362	tags=40%, list=28%, signal=55%
												798	GOBP_INFLAMMATORY_CELL_APOPTOTIC_PROCESS	27	-0.49	-1.29	0.095	0.322	1	7291	tags=70%, list=38%, signal=113%
												799	GOBP_NEGATIVE_REGULATION_OF_B_CELL_PROLIFERATION	20	-0.5	-1.29	0.125	0.322	1	4064	tags=50%, list=21%, signal=63%
												800	GOBP_REGULATION_OF_RECEPTOR_RECYCLING	30	-0.48	-1.29	0.11	0.322	1	4940	tags=47%, list=26%, signal=63%
												801	GOBP_NOTCH_SIGNALING_PATHWAY	180	-0.42	-1.29	0.004	0.322	1	4843	tags=41%, list=25%, signal=54%
												802	GOBP_RESPONSE_TO_ARSENIC_CONTAINING_SUBSTANCE	26	-0.48	-1.29	0.097	0.322	1	4908	tags=38%, list=26%, signal=52%
												803	GOBP_CELLULAR_RESPONSE_TO_INORGANIC_SUBSTANCE	228	-0.41	-1.29	0.002	0.323	1	6808	tags=42%, list=35%, signal=65%
												804	GOBP_POSITIVE_REGULATION_OF_FILOPODIUM_ASSEMBLY	34	-0.47	-1.29	0.085	0.322	1	5566	tags=41%, list=29%, signal=58%
												805	GOBP_GLYCOSPHINGOLIPID_BIOSYNTHETIC_PROCESS	30	-0.48	-1.29	0.095	0.322	1	1977	tags=30%, list=10%, signal=33%
												806	GOBP_REGULATION_OF_TUBE_SIZE	185	-0.42	-1.29	0.003	0.323	1	7347	tags=55%, list=38%, signal=88%
												807	GOBP_CARDIAC_LEFT_VENTRICLE_MORPHOGENESIS	21	-0.5	-1.29	0.119	0.323	1	2797	tags=38%, list=15%, signal=45%
												808	GOBP_REGULATION_OF_NUCLEOCYTOPLASMIC_TRANSPORT	131	-0.42	-1.29	0.018	0.323	1	7513	tags=59%, list=39%, signal=96%
												809	GOBP_SMOOTH_MUSCLE_CONTRACTION	119	-0.42	-1.29	0.021	0.323	1	6127	tags=47%, list=32%, signal=69%
												810	GOBP_REGULATION_OF_AUTOPHAGY_OF_MITOCHONDRION	31	-0.48	-1.29	0.087	0.323	1	6339	tags=52%, list=33%, signal=77%
												811	GOBP_CELL_CELL_JUNCTION_ASSEMBLY	156	-0.42	-1.29	0.007	0.323	1	6514	tags=48%, list=34%, signal=72%
												812	GOBP_NEGATIVE_REGULATION_OF_PROTEIN_UBIQUITINATION	80	-0.43	-1.29	0.025	0.324	1	4679	tags=38%, list=24%, signal=49%
												813	GOBP_EPITHELIAL_CELL_DEVELOPMENT	238	-0.41	-1.29	0.001	0.324	1	6078	tags=42%, list=32%, signal=61%
												814	GOBP_OUTFLOW_TRACT_SEPTUM_MORPHOGENESIS	28	-0.49	-1.29	0.09	0.323	1	1876	tags=32%, list=10%, signal=36%
												815	GOBP_RADIAL_GLIAL_CELL_DIFFERENTIATION	18	-0.52	-1.29	0.102	0.323	1	7089	tags=78%, list=37%, signal=123%
												816	GOBP_C4_DICARBOXYLATE_TRANSPORT	28	-0.48	-1.29	0.099	0.323	1	7850	tags=61%, list=41%, signal=103%
												817	GOBP_POSITIVE_REGULATION_OF_RHO_PROTEIN_SIGNAL_TRANSDUCTION	34	-0.47	-1.29	0.08	0.323	1	4652	tags=47%, list=24%, signal=62%
												818	GOBP_BICARBONATE_TRANSPORT	19	-0.51	-1.29	0.112	0.323	1	3990	tags=53%, list=21%, signal=66%
												819	GOBP_TRANSCRIPTION_BY_RNA_POLYMERASE_III	47	-0.45	-1.28	0.066	0.322	1	7793	tags=55%, list=41%, signal=93%
												820	GOBP_IMMUNE_RESPONSE_TO_TUMOR_CELL	28	-0.48	-1.28	0.097	0.322	1	6942	tags=57%, list=36%, signal=89%
												821	GOBP_POSITIVE_REGULATION_OF_NUCLEOCYTOPLASMIC_TRANSPORT	75	-0.43	-1.28	0.041	0.322	1	7053	tags=57%, list=37%, signal=90%
												822	GOBP_POSITIVE_REGULATION_OF_AXONOGENESIS	100	-0.43	-1.28	0.017	0.322	1	8639	tags=63%, list=45%, signal=114%
												823	GOBP_NEGATIVE_REGULATION_OF_DEPHOSPHORYLATION	45	-0.45	-1.28	0.061	0.324	1	5235	tags=47%, list=27%, signal=64%
												824	GOBP_RESPONSE_TO_VIRUS	341	-0.41	-1.28	0	0.323	1	6879	tags=48%, list=36%, signal=74%
												825	GOBP_PROTEIN_O_LINKED_MANNOSYLATION	16	-0.53	-1.28	0.116	0.323	1	8192	tags=81%, list=43%, signal=142%
												826	GOBP_POSITIVE_REGULATION_OF_DEFENSE_RESPONSE	453	-0.4	-1.28	0	0.324	1	7674	tags=51%, list=40%, signal=83%
												827	GOBP_REGULATION_OF_RRNA_PROCESSING	15	-0.54	-1.28	0.124	0.324	1	3657	tags=40%, list=19%, signal=49%
												828	GOBP_NEURON_PROJECTION_EXTENSION_INVOLVED_IN_NEURON_PROJECTION_GUIDANCE	37	-0.47	-1.28	0.079	0.324	1	8319	tags=70%, list=43%, signal=124%
												829	GOBP_LYMPH_VESSEL_DEVELOPMENT	32	-0.47	-1.28	0.089	0.324	1	6352	tags=53%, list=33%, signal=79%
												830	GOBP_OVULATION_CYCLE	66	-0.44	-1.28	0.047	0.323	1	7988	tags=58%, list=42%, signal=98%
												831	GOBP_SIGNALING_RECEPTOR_LIGAND_PRECURSOR_PROCESSING	32	-0.47	-1.28	0.103	0.323	1	8208	tags=75%, list=43%, signal=131%
												832	GOBP_CELLULAR_RESPONSE_TO_SALT_STRESS	16	-0.53	-1.28	0.123	0.323	1	6696	tags=44%, list=35%, signal=67%
												833	GOBP_POSITIVE_REGULATION_OF_JNK_CASCADE	94	-0.43	-1.28	0.024	0.323	1	5646	tags=45%, list=29%, signal=63%
												834	GOBP_LEUKOCYTE_ACTIVATION_INVOLVED_IN_INFLAMMATORY_RESPONSE	51	-0.45	-1.28	0.065	0.323	1	3135	tags=37%, list=16%, signal=44%
												835	GOBP_NEGATIVE_REGULATION_OF_ENDOCYTOSIS	71	-0.43	-1.28	0.042	0.323	1	5684	tags=44%, list=30%, signal=62%
												836	GOBP_UROGENITAL_SYSTEM_DEVELOPMENT	67	-0.44	-1.28	0.044	0.324	1	6646	tags=51%, list=35%, signal=77%
												837	GOBP_POSITIVE_REGULATION_OF_NOTCH_SIGNALING_PATHWAY	44	-0.45	-1.28	0.082	0.324	1	4827	tags=48%, list=25%, signal=64%
												838	GOBP_RETINA_LAYER_FORMATION	22	-0.5	-1.28	0.113	0.324	1	9268	tags=86%, list=48%, signal=167%
												839	GOBP_PLASMA_MEMBRANE_TUBULATION	18	-0.51	-1.28	0.12	0.324	1	6133	tags=61%, list=32%, signal=90%
												840	GOBP_VACUOLAR_TRANSPORT	160	-0.42	-1.28	0.008	0.323	1	6565	tags=52%, list=34%, signal=79%
												841	GOBP_EPITHELIAL_TUBE_MORPHOGENESIS	394	-0.4	-1.28	0	0.323	1	7207	tags=52%, list=38%, signal=81%
												842	GOBP_LYMPH_VESSEL_MORPHOGENESIS	24	-0.49	-1.28	0.12	0.323	1	5978	tags=50%, list=31%, signal=73%
												843	GOBP_REGULATION_OF_MORPHOGENESIS_OF_AN_EPITHELIUM	73	-0.44	-1.28	0.047	0.322	1	6646	tags=48%, list=35%, signal=73%
												844	GOBP_GENITALIA_DEVELOPMENT	50	-0.45	-1.28	0.067	0.322	1	7545	tags=54%, list=39%, signal=89%
												845	GOBP_THIOESTER_BIOSYNTHETIC_PROCESS	27	-0.48	-1.28	0.107	0.324	1	8696	tags=78%, list=45%, signal=142%
												846	GOBP_PYRIMIDINE_CONTAINING_COMPOUND_CATABOLIC_PROCESS	27	-0.48	-1.28	0.09	0.324	1	4881	tags=41%, list=25%, signal=55%
												847	GOBP_ALPHA_BETA_T_CELL_PROLIFERATION	59	-0.44	-1.28	0.059	0.324	1	5334	tags=49%, list=28%, signal=68%
												848	GOBP_PROTEIN_DEMETHYLATION	17	-0.52	-1.28	0.101	0.323	1	5692	tags=59%, list=30%, signal=84%
												849	GOBP_WALKING_BEHAVIOR	53	-0.45	-1.28	0.066	0.323	1	6423	tags=51%, list=33%, signal=76%
												850	GOBP_REGULATION_OF_CARDIAC_MUSCLE_CELL_MEMBRANE_REPOLARIZATION	26	-0.49	-1.28	0.094	0.323	1	4927	tags=42%, list=26%, signal=57%
												851	GOBP_REGULATION_OF_MEMBRANE_POTENTIAL	484	-0.4	-1.28	0	0.323	1	6164	tags=43%, list=32%, signal=61%
												852	GOBP_MEMBRANE_FISSION	29	-0.48	-1.28	0.085	0.323	1	7825	tags=72%, list=41%, signal=122%
												853	GOBP_MOTOR_NEURON_APOPTOTIC_PROCESS	26	-0.49	-1.28	0.098	0.323	1	7409	tags=62%, list=39%, signal=100%
												854	GOBP_REGULATION_OF_PROTEIN_KINASE_C_SIGNALING	20	-0.5	-1.28	0.116	0.322	1	7101	tags=65%, list=37%, signal=103%
												855	GOBP_LOCOMOTORY_EXPLORATION_BEHAVIOR	21	-0.5	-1.28	0.104	0.322	1	6140	tags=57%, list=32%, signal=84%
												856	GOBP_MITOTIC_SISTER_CHROMATID_SEGREGATION	169	-0.41	-1.28	0.006	0.322	1	7825	tags=59%, list=41%, signal=99%
												857	GOBP_REGULATION_OF_DEFENSE_RESPONSE_TO_VIRUS	98	-0.43	-1.28	0.026	0.322	1	6641	tags=46%, list=35%, signal=70%
												858	GOBP_SPROUTING_ANGIOGENESIS	129	-0.42	-1.28	0.013	0.322	1	7417	tags=56%, list=39%, signal=90%
												859	GOBP_REGULATION_OF_POTASSIUM_ION_TRANSMEMBRANE_TRANSPORTER_ACTIVITY	67	-0.43	-1.28	0.037	0.321	1	4927	tags=42%, list=26%, signal=56%
												860	GOBP_MHC_CLASS_II_BIOSYNTHETIC_PROCESS	17	-0.52	-1.28	0.127	0.323	1	8074	tags=65%, list=42%, signal=112%
												861	GOBP_REGULATION_OF_TRANSLATIONAL_INITIATION_IN_RESPONSE_TO_STRESS	15	-0.53	-1.28	0.122	0.323	1	3567	tags=47%, list=19%, signal=57%
												862	GOBP_POSITIVE_REGULATION_OF_WNT_SIGNALING_PATHWAY	140	-0.42	-1.28	0.017	0.322	1	9331	tags=71%, list=49%, signal=138%
												863	GOBP_POSITIVE_REGULATION_OF_T_CELL_MEDIATED_IMMUNITY	59	-0.45	-1.28	0.064	0.322	1	7342	tags=63%, list=38%, signal=101%
												864	GOBP_REGULATION_OF_PROTEIN_LOCALIZATION_TO_CELL_PERIPHERY	151	-0.42	-1.28	0.005	0.322	1	6976	tags=52%, list=36%, signal=82%
												865	GOBP_POSITIVE_REGULATION_OF_LEUKOCYTE_APOPTOTIC_PROCESS	32	-0.47	-1.28	0.095	0.322	1	6424	tags=56%, list=33%, signal=84%
												866	GOBP_CELL_CELL_SIGNALING_BY_WNT	448	-0.4	-1.28	0	0.321	1	7594	tags=54%, list=40%, signal=87%
												867	GOBP_CELLULAR_RESPONSE_TO_LEPTIN_STIMULUS	16	-0.52	-1.28	0.133	0.322	1	5533	tags=69%, list=29%, signal=97%
												868	GOBP_RESPONSE_TO_STARVATION	195	-0.41	-1.28	0.005	0.322	1	7440	tags=55%, list=39%, signal=89%
												869	GOBP_RESPONSE_TO_PURINE_CONTAINING_COMPOUND	112	-0.42	-1.28	0.022	0.322	1	5741	tags=42%, list=30%, signal=60%
												870	GOBP_REGULATION_OF_ESTABLISHMENT_OR_MAINTENANCE_OF_CELL_POLARITY	27	-0.48	-1.28	0.101	0.322	1	7167	tags=70%, list=37%, signal=112%
												871	GOBP_POSITIVE_REGULATION_OF_TRANSCRIPTION_FROM_RNA_POLYMERASE_II_PROMOTER_IN_RESPONSE_TO_STRESS	20	-0.5	-1.28	0.109	0.322	1	3143	tags=40%, list=16%, signal=48%
												872	GOBP_MITOCHONDRIAL_TRANSCRIPTION	21	-0.51	-1.28	0.116	0.322	1	1919	tags=29%, list=10%, signal=32%
												873	GOBP_ASPARTATE_TRANSMEMBRANE_TRANSPORT	20	-0.5	-1.28	0.123	0.322	1	7850	tags=70%, list=41%, signal=118%
												874	GOBP_REGULATION_OF_PROTEIN_LOCALIZATION_TO_PLASMA_MEMBRANE	116	-0.42	-1.28	0.026	0.321	1	6976	tags=52%, list=36%, signal=81%
												875	GOBP_REGULATION_OF_PHOSPHATIDYLINOSITOL_3_KINASE_PROTEIN_KINASE_B_SIGNAL_TRANSDUCTION	254	-0.41	-1.28	0.004	0.321	1	7290	tags=50%, list=38%, signal=80%
												876	GOBP_G_PROTEIN_COUPLED_GLUTAMATE_RECEPTOR_SIGNALING_PATHWAY	15	-0.53	-1.28	0.129	0.321	1	2157	tags=40%, list=11%, signal=45%
												877	GOBP_POSITIVE_REGULATION_OF_INTRACELLULAR_PROTEIN_TRANSPORT	147	-0.41	-1.28	0.019	0.321	1	7043	tags=52%, list=37%, signal=82%
												878	GOBP_DETECTION_OF_CHEMICAL_STIMULUS_INVOLVED_IN_SENSORY_PERCEPTION_OF_TASTE	45	-0.45	-1.28	0.085	0.321	1	868	tags=7%, list=5%, signal=7%
												879	GOBP_REGULATION_OF_EXCITATORY_SYNAPSE_ASSEMBLY	20	-0.5	-1.28	0.111	0.321	1	1666	tags=30%, list=9%, signal=33%
												880	GOBP_MITOCHONDRIAL_GENOME_MAINTENANCE	34	-0.47	-1.28	0.09	0.321	1	7341	tags=59%, list=38%, signal=95%
												881	GOBP_STRESS_GRANULE_ASSEMBLY	32	-0.47	-1.28	0.088	0.321	1	7401	tags=69%, list=39%, signal=112%
												882	GOBP_EXOCYTIC_PROCESS	101	-0.42	-1.28	0.015	0.321	1	7526	tags=58%, list=39%, signal=96%
												883	GOBP_RESPONSE_TO_DOPAMINE	55	-0.44	-1.28	0.056	0.321	1	4786	tags=44%, list=25%, signal=58%
												884	GOBP_RESPONSE_TO_MUSCLE_ACTIVITY	16	-0.52	-1.28	0.128	0.321	1	6668	tags=50%, list=35%, signal=77%
												885	GOBP_REGULATION_OF_POSTSYNAPTIC_DENSITY_ASSEMBLY	15	-0.53	-1.28	0.132	0.321	1	1666	tags=33%, list=9%, signal=36%
												886	GOBP_DNA_REPLICATION_INITIATION	33	-0.47	-1.28	0.071	0.32	1	4264	tags=42%, list=22%, signal=54%
												887	GOBP_REGULATION_OF_LYASE_ACTIVITY	59	-0.44	-1.28	0.059	0.321	1	6340	tags=49%, list=33%, signal=73%
												888	GOBP_POSITIVE_REGULATION_OF_PROTEIN_LOCALIZATION_TO_MEMBRANE	113	-0.42	-1.28	0.02	0.32	1	6982	tags=52%, list=36%, signal=82%
												889	GOBP_REGULATION_OF_HEART_RATE_BY_CARDIAC_CONDUCTION	36	-0.47	-1.28	0.073	0.321	1	6488	tags=53%, list=34%, signal=80%
												890	GOBP_RESPONSE_TO_CHOLESTEROL	23	-0.49	-1.28	0.102	0.321	1	4570	tags=43%, list=24%, signal=57%
												891	GOBP_NEGATIVE_REGULATION_OF_REACTIVE_OXYGEN_SPECIES_BIOSYNTHETIC_PROCESS	21	-0.5	-1.28	0.116	0.321	1	5372	tags=52%, list=28%, signal=73%
												892	GOBP_JNK_CASCADE	169	-0.41	-1.28	0.007	0.321	1	5318	tags=41%, list=28%, signal=57%
												893	GOBP_REGULATION_OF_PHOSPHATASE_ACTIVITY	76	-0.43	-1.28	0.046	0.322	1	8480	tags=64%, list=44%, signal=115%
												894	GOBP_REGULATION_OF_PROTEIN_LOCALIZATION_TO_MEMBRANE	206	-0.41	-1.28	0.002	0.322	1	7600	tags=55%, list=40%, signal=90%
												895	GOBP_POSITIVE_REGULATION_OF_MACROPHAGE_DERIVED_FOAM_CELL_DIFFERENTIATION	15	-0.53	-1.28	0.138	0.322	1	2796	tags=27%, list=15%, signal=31%
												896	GOBP_NEUROTRANSMITTER_SECRETION	171	-0.41	-1.28	0.008	0.323	1	7502	tags=55%, list=39%, signal=89%
												897	GOBP_REGULATION_OF_T_CELL_MEDIATED_CYTOTOXICITY	35	-0.47	-1.28	0.08	0.322	1	6808	tags=63%, list=35%, signal=97%
												898	GOBP_HEAD_MORPHOGENESIS	46	-0.45	-1.28	0.066	0.322	1	7649	tags=65%, list=40%, signal=108%
												899	GOBP_GLIAL_CELL_PROLIFERATION	78	-0.43	-1.28	0.041	0.322	1	7649	tags=56%, list=40%, signal=93%
												900	GOBP_TELENCEPHALON_DEVELOPMENT	264	-0.41	-1.27	0.003	0.322	1	7850	tags=58%, list=41%, signal=97%
												901	GOBP_NEGATIVE_REGULATION_OF_NEURON_PROJECTION_DEVELOPMENT	162	-0.42	-1.27	0.011	0.322	1	5511	tags=45%, list=29%, signal=63%
												902	GOBP_REGULATION_OF_LONG_TERM_SYNAPTIC_POTENTIATION	57	-0.44	-1.27	0.062	0.322	1	6131	tags=51%, list=32%, signal=75%
												903	GOBP_MEMBRANE_HYPERPOLARIZATION	19	-0.51	-1.27	0.113	0.322	1	8579	tags=74%, list=45%, signal=133%
												904	GOBP_CELL_CELL_JUNCTION_ORGANIZATION	218	-0.41	-1.27	0.006	0.322	1	6514	tags=46%, list=34%, signal=69%
												905	GOBP_REGULATION_OF_WNT_SIGNALING_PATHWAY_PLANAR_CELL_POLARITY_PATHWAY	15	-0.53	-1.27	0.128	0.322	1	4013	tags=53%, list=21%, signal=67%
												906	GOBP_POSITIVE_REGULATION_OF_EPITHELIAL_CELL_MIGRATION	161	-0.41	-1.27	0.007	0.322	1	7326	tags=56%, list=38%, signal=90%
												907	GOBP_SEMAPHORIN_PLEXIN_SIGNALING_PATHWAY_INVOLVED_IN_NEURON_PROJECTION_GUIDANCE	17	-0.52	-1.27	0.129	0.323	1	2950	tags=41%, list=15%, signal=49%
												908	GOBP_POSITIVE_REGULATION_OF_PEPTIDYL_TYROSINE_PHOSPHORYLATION	185	-0.41	-1.27	0.011	0.323	1	5384	tags=41%, list=28%, signal=57%
												909	GOBP_KIDNEY_MORPHOGENESIS	105	-0.42	-1.27	0.017	0.323	1	6646	tags=46%, list=35%, signal=70%
												910	GOBP_REGULATION_OF_ACTION_POTENTIAL	69	-0.43	-1.27	0.049	0.322	1	6488	tags=51%, list=34%, signal=76%
												911	GOBP_CYTOKINETIC_PROCESS	40	-0.45	-1.27	0.087	0.322	1	5775	tags=43%, list=30%, signal=61%
												912	GOBP_CELLULAR_RESPONSE_TO_HYPOXIA	117	-0.42	-1.27	0.014	0.322	1	4518	tags=38%, list=24%, signal=50%
												913	GOBP_REGULATION_OF_CHROMATIN_BINDING	24	-0.49	-1.27	0.118	0.322	1	7313	tags=67%, list=38%, signal=108%
												914	GOBP_REGULATION_OF_MICROTUBULE_CYTOSKELETON_ORGANIZATION	156	-0.41	-1.27	0.008	0.322	1	7401	tags=53%, list=39%, signal=85%
												915	GOBP_REGULATION_OF_DEVELOPMENTAL_GROWTH	392	-0.4	-1.27	0	0.322	1	7811	tags=56%, list=41%, signal=92%
												916	GOBP_REGULATION_OF_ADENYLATE_CYCLASE_ACTIVITY	47	-0.45	-1.27	0.076	0.322	1	6340	tags=51%, list=33%, signal=76%
												917	GOBP_MORPHOGENESIS_OF_AN_ENDOTHELIUM	19	-0.51	-1.27	0.116	0.322	1	3127	tags=37%, list=16%, signal=44%
												918	GOBP_SULFUR_COMPOUND_BIOSYNTHETIC_PROCESS	115	-0.42	-1.27	0.026	0.323	1	8702	tags=67%, list=45%, signal=122%
												919	GOBP_RESPONSE_TO_TYPE_I_INTERFERON	67	-0.44	-1.27	0.035	0.323	1	7596	tags=52%, list=40%, signal=86%
												920	GOBP_REGULATION_OF_GRANULOCYTE_CHEMOTAXIS	56	-0.44	-1.27	0.063	0.323	1	7207	tags=55%, list=38%, signal=88%
												921	GOBP_CELLULAR_RESPONSE_TO_DSRNA	20	-0.51	-1.27	0.121	0.323	1	6005	tags=50%, list=31%, signal=73%
												922	GOBP_POSITIVE_REGULATION_OF_VIRAL_PROCESS	66	-0.44	-1.27	0.062	0.323	1	7499	tags=56%, list=39%, signal=92%
												923	GOBP_EXTRACELLULAR_MATRIX_DISASSEMBLY	36	-0.46	-1.27	0.099	0.324	1	2537	tags=31%, list=13%, signal=35%
												924	GOBP_REGULATION_OF_PEPTIDYL_SERINE_PHOSPHORYLATION	134	-0.42	-1.27	0.013	0.324	1	6428	tags=49%, list=34%, signal=72%
												925	GOBP_RESPONSE_TO_PROTOZOAN	36	-0.47	-1.27	0.085	0.323	1	7078	tags=50%, list=37%, signal=79%
												926	GOBP_CELLULAR_RESPONSE_TO_DEXAMETHASONE_STIMULUS	26	-0.48	-1.27	0.1	0.324	1	2109	tags=27%, list=11%, signal=30%
												927	GOBP_AMINE_METABOLIC_PROCESS	124	-0.42	-1.27	0.016	0.324	1	5051	tags=38%, list=26%, signal=51%
												928	GOBP_POSITIVE_REGULATION_OF_SODIUM_ION_TRANSMEMBRANE_TRANSPORTER_ACTIVITY	19	-0.51	-1.27	0.121	0.324	1	4138	tags=37%, list=22%, signal=47%
												929	GOBP_BRANCHING_INVOLVED_IN_MAMMARY_GLAND_DUCT_MORPHOGENESIS	29	-0.47	-1.27	0.1	0.324	1	6799	tags=62%, list=35%, signal=96%
												930	GOBP_REGULATION_OF_DENDRITE_MORPHOGENESIS	96	-0.42	-1.27	0.03	0.324	1	7367	tags=51%, list=38%, signal=82%
												931	GOBP_GLOMERULUS_DEVELOPMENT	67	-0.44	-1.27	0.05	0.324	1	7220	tags=58%, list=38%, signal=93%
												932	GOBP_CHROMOSOME_SEPARATION	81	-0.43	-1.27	0.036	0.324	1	6194	tags=48%, list=32%, signal=71%
												933	GOBP_DEVELOPMENT_OF_PRIMARY_FEMALE_SEXUAL_CHARACTERISTICS	123	-0.42	-1.27	0.016	0.323	1	7750	tags=55%, list=40%, signal=92%
												934	GOBP_POSTSYNAPTIC_MEMBRANE_ORGANIZATION	47	-0.45	-1.27	0.086	0.323	1	7297	tags=53%, list=38%, signal=86%
												935	GOBP_REGULATION_OF_BLOOD_CIRCULATION	264	-0.4	-1.27	0.006	0.323	1	6557	tags=48%, list=34%, signal=72%
												936	GOBP_TROPHOBLAST_GIANT_CELL_DIFFERENTIATION	19	-0.51	-1.27	0.132	0.323	1	7346	tags=53%, list=38%, signal=85%
												937	GOBP_RETICULOPHAGY	17	-0.51	-1.27	0.135	0.323	1	8281	tags=76%, list=43%, signal=134%
												938	GOBP_NEGATIVE_REGULATION_OF_ENDOTHELIAL_CELL_APOPTOTIC_PROCESS	32	-0.46	-1.27	0.098	0.323	1	5309	tags=47%, list=28%, signal=65%
												939	GOBP_OOCYTE_DIFFERENTIATION	66	-0.43	-1.27	0.055	0.323	1	7168	tags=56%, list=37%, signal=89%
												940	GOBP_POSITIVE_REGULATION_OF_MESENCHYMAL_CELL_PROLIFERATION	32	-0.47	-1.27	0.095	0.324	1	4919	tags=41%, list=26%, signal=55%
												941	GOBP_BODY_MORPHOGENESIS	62	-0.44	-1.27	0.061	0.324	1	7834	tags=65%, list=41%, signal=109%
												942	GOBP_HINDBRAIN_RADIAL_GLIA_GUIDED_CELL_MIGRATION	15	-0.52	-1.27	0.131	0.324	1	5576	tags=60%, list=29%, signal=85%
												943	GOBP_REGULATION_OF_MICROTUBULE_DEPOLYMERIZATION	39	-0.46	-1.27	0.095	0.323	1	6617	tags=59%, list=35%, signal=90%
												944	GOBP_PROTEIN_PALMITOYLATION	33	-0.47	-1.27	0.099	0.323	1	7521	tags=58%, list=39%, signal=95%
												945	GOBP_MAINTENANCE_OF_CELL_NUMBER	211	-0.41	-1.27	0.001	0.323	1	6891	tags=47%, list=36%, signal=73%
												946	GOBP_DENDRITIC_SPINE_MORPHOGENESIS	74	-0.43	-1.27	0.049	0.323	1	5502	tags=46%, list=29%, signal=64%
												947	GOBP_POSTSYNAPTIC_MODULATION_OF_CHEMICAL_SYNAPTIC_TRANSMISSION	37	-0.46	-1.27	0.093	0.323	1	7244	tags=65%, list=38%, signal=104%
												948	GOBP_CLATHRIN_COAT_ASSEMBLY	19	-0.5	-1.27	0.129	0.323	1	4845	tags=47%, list=25%, signal=63%
												949	GOBP_DNA_DOUBLE_STRAND_BREAK_PROCESSING	19	-0.51	-1.27	0.122	0.323	1	5243	tags=58%, list=27%, signal=80%
												950	GOBP_NEGATIVE_REGULATION_OF_NEURON_APOPTOTIC_PROCESS	205	-0.41	-1.27	0.009	0.323	1	7480	tags=53%, list=39%, signal=86%
												951	GOBP_ENDOSOME_TO_LYSOSOME_TRANSPORT	70	-0.43	-1.27	0.043	0.323	1	6378	tags=53%, list=33%, signal=79%
												952	GOBP_RESPONSE_TO_LEUKEMIA_INHIBITORY_FACTOR	188	-0.41	-1.27	0.007	0.323	1	7727	tags=38%, list=40%, signal=64%
												953	GOBP_REGULATION_OF_POSTSYNAPTIC_SPECIALIZATION_ASSEMBLY	20	-0.51	-1.27	0.118	0.323	1	1756	tags=30%, list=9%, signal=33%
												954	GOBP_SENSORY_PERCEPTION_OF_MECHANICAL_STIMULUS	248	-0.41	-1.27	0.006	0.324	1	3887	tags=27%, list=20%, signal=33%
												955	GOBP_GLYCOPROTEIN_CATABOLIC_PROCESS	32	-0.47	-1.27	0.101	0.324	1	4545	tags=38%, list=24%, signal=49%
												956	GOBP_REGULATION_OF_MITOCHONDRIAL_FISSION	35	-0.46	-1.27	0.104	0.325	1	6702	tags=57%, list=35%, signal=88%
												957	GOBP_PROSTAGLANDIN_TRANSPORT	29	-0.47	-1.27	0.103	0.325	1	5741	tags=41%, list=30%, signal=59%
												958	GOBP_CELL_DIFFERENTIATION_INVOLVED_IN_KIDNEY_DEVELOPMENT	51	-0.44	-1.27	0.078	0.325	1	7118	tags=49%, list=37%, signal=78%
												959	GOBP_NEGATIVE_REGULATION_OF_PLATELET_ACTIVATION	15	-0.52	-1.27	0.145	0.327	1	3266	tags=40%, list=17%, signal=48%
												960	GOBP_KIDNEY_EPITHELIUM_DEVELOPMENT	153	-0.41	-1.27	0.012	0.326	1	6722	tags=46%, list=35%, signal=71%
												961	GOBP_NEGATIVE_REGULATION_OF_NUCLEAR_DIVISION	67	-0.43	-1.27	0.053	0.326	1	6358	tags=52%, list=33%, signal=78%
												962	GOBP_INTESTINAL_EPITHELIAL_CELL_DIFFERENTIATION	28	-0.47	-1.27	0.111	0.326	1	3222	tags=29%, list=17%, signal=34%
												963	GOBP_N_ACETYLGLUCOSAMINE_METABOLIC_PROCESS	16	-0.52	-1.27	0.14	0.326	1	3348	tags=38%, list=17%, signal=45%
												964	GOBP_NEGATIVE_REGULATION_OF_SMALL_GTPASE_MEDIATED_SIGNAL_TRANSDUCTION	62	-0.43	-1.27	0.052	0.326	1	5387	tags=47%, list=28%, signal=65%
												965	GOBP_TOLL_LIKE_RECEPTOR_SIGNALING_PATHWAY	65	-0.43	-1.27	0.066	0.326	1	6878	tags=49%, list=36%, signal=76%
												966	GOBP_HEART_TRABECULA_MORPHOGENESIS	37	-0.46	-1.27	0.097	0.326	1	2911	tags=35%, list=15%, signal=41%
												967	GOBP_HEART_PROCESS	246	-0.4	-1.27	0.003	0.326	1	4949	tags=38%, list=26%, signal=50%
												968	GOBP_AXON_REGENERATION	55	-0.44	-1.27	0.082	0.326	1	5309	tags=51%, list=28%, signal=70%
												969	GOBP_MICROTUBULE_ANCHORING	25	-0.48	-1.27	0.109	0.326	1	4646	tags=44%, list=24%, signal=58%
												970	GOBP_ODONTOGENESIS	128	-0.41	-1.27	0.021	0.326	1	6425	tags=48%, list=34%, signal=72%
												971	GOBP_MEMBRANE_LIPID_METABOLIC_PROCESS	185	-0.41	-1.27	0.011	0.326	1	7553	tags=55%, list=39%, signal=89%
												972	GOBP_MESONEPHROS_DEVELOPMENT	113	-0.42	-1.27	0.024	0.326	1	6657	tags=46%, list=35%, signal=70%
												973	GOBP_ASTROCYTE_DIFFERENTIATION	91	-0.43	-1.27	0.032	0.326	1	7215	tags=58%, list=38%, signal=93%
												974	GOBP_POSITIVE_REGULATION_OF_GLIOGENESIS	90	-0.42	-1.27	0.045	0.326	1	5558	tags=43%, list=29%, signal=61%
												975	GOBP_REGULATION_OF_VASCULOGENESIS	15	-0.52	-1.26	0.158	0.326	1	5265	tags=53%, list=27%, signal=73%
												976	GOBP_ENDOCYTIC_RECYCLING	87	-0.43	-1.26	0.039	0.326	1	5949	tags=51%, list=31%, signal=73%
												977	GOBP_MITOCHONDRIAL_DNA_METABOLIC_PROCESS	25	-0.48	-1.26	0.109	0.326	1	7341	tags=60%, list=38%, signal=97%
												978	GOBP_NEGATIVE_REGULATION_OF_VIRAL_PROCESS	90	-0.43	-1.26	0.031	0.326	1	6348	tags=46%, list=33%, signal=68%
												979	GOBP_REGULATION_OF_AMYLOID_BETA_FORMATION	36	-0.46	-1.26	0.104	0.326	1	7505	tags=61%, list=39%, signal=100%
												980	GOBP_VASOCONSTRICTION	110	-0.42	-1.26	0.023	0.326	1	7347	tags=55%, list=38%, signal=88%
												981	GOBP_REGULATION_OF_ENDOTHELIAL_CELL_DIFFERENTIATION	41	-0.46	-1.26	0.078	0.326	1	5197	tags=51%, list=27%, signal=70%
												982	GOBP_AMINO_ACID_TRANSPORT	169	-0.41	-1.26	0.016	0.325	1	5357	tags=42%, list=28%, signal=58%
												983	GOBP_REGULATION_OF_POSTSYNAPSE_ORGANIZATION	137	-0.41	-1.26	0.018	0.326	1	7712	tags=56%, list=40%, signal=93%
												984	GOBP_RESPONSE_TO_SALT	324	-0.4	-1.26	0.001	0.326	1	7008	tags=47%, list=37%, signal=73%
												985	GOBP_COENZYME_A_METABOLIC_PROCESS	20	-0.49	-1.26	0.132	0.327	1	7755	tags=70%, list=40%, signal=117%
												986	GOBP_REGULATION_OF_PROTEIN_MODIFICATION_BY_SMALL_PROTEIN_CONJUGATION_OR_REMOVAL	238	-0.4	-1.26	0.007	0.327	1	7782	tags=56%, list=41%, signal=93%
												987	GOBP_NEGATIVE_REGULATION_OF_MULTICELLULAR_ORGANISM_GROWTH	16	-0.52	-1.26	0.132	0.326	1	1850	tags=31%, list=10%, signal=35%
												988	GOBP_REGULATION_OF_NEURON_PROJECTION_REGENERATION	40	-0.45	-1.26	0.096	0.326	1	7267	tags=63%, list=38%, signal=100%
												989	GOBP_CARDIAC_MUSCLE_CELL_PROLIFERATION	62	-0.43	-1.26	0.058	0.327	1	4919	tags=44%, list=26%, signal=58%
												990	GOBP_RENAL_SODIUM_ION_TRANSPORT	15	-0.52	-1.26	0.134	0.327	1	4301	tags=47%, list=22%, signal=60%
												991	GOBP_POSITIVE_REGULATION_OF_CELL_CYCLE_G2_M_PHASE_TRANSITION	32	-0.47	-1.26	0.106	0.328	1	4527	tags=41%, list=24%, signal=53%
												992	GOBP_MITOTIC_G2_DNA_DAMAGE_CHECKPOINT_SIGNALING	40	-0.46	-1.26	0.102	0.328	1	6296	tags=50%, list=33%, signal=74%
												993	GOBP_DETECTION_OF_TEMPERATURE_STIMULUS_INVOLVED_IN_SENSORY_PERCEPTION_OF_PAIN	23	-0.49	-1.26	0.126	0.328	1	1553	tags=30%, list=8%, signal=33%
												994	GOBP_REGULATION_OF_TRANSCRIPTION_REGULATORY_REGION_DNA_BINDING	51	-0.44	-1.26	0.083	0.328	1	7523	tags=59%, list=39%, signal=97%
												995	GOBP_CYTOSOLIC_TRANSPORT	165	-0.41	-1.26	0.009	0.328	1	6902	tags=54%, list=36%, signal=84%
												996	GOBP_RESPONSE_TO_MECHANICAL_STIMULUS	171	-0.41	-1.26	0.011	0.328	1	6063	tags=42%, list=32%, signal=60%
												997	GOBP_REGULATION_OF_VASCULAR_ENDOTHELIAL_GROWTH_FACTOR_RECEPTOR_SIGNALING_PATHWAY	32	-0.47	-1.26	0.123	0.327	1	2167	tags=34%, list=11%, signal=39%
												998	GOBP_POSITIVE_REGULATION_BY_HOST_OF_VIRAL_PROCESS	22	-0.49	-1.26	0.138	0.327	1	7579	tags=73%, list=40%, signal=120%
												999	GOBP_RESPONSE_TO_LITHIUM_ION	16	-0.52	-1.26	0.137	0.327	1	4548	tags=50%, list=24%, signal=65%
												1000	GOBP_REGULATION_OF_INTRINSIC_APOPTOTIC_SIGNALING_PATHWAY_IN_RESPONSE_TO_DNA_DAMAGE_BY_P53_CLASS_MEDIATOR	16	-0.51	-1.26	0.153	0.327	1	5469	tags=44%, list=29%, signal=61%
												1001	GOBP_SMALL_GTPASE_MEDIATED_SIGNAL_TRANSDUCTION	419	-0.4	-1.26	0.001	0.327	1	7313	tags=54%, list=38%, signal=85%
												1002	GOBP_REGULATION_OF_ANOIKIS	22	-0.49	-1.26	0.117	0.326	1	4518	tags=45%, list=24%, signal=59%
												1003	GOBP_REGULATION_OF_MYELINATION	61	-0.43	-1.26	0.058	0.326	1	6329	tags=48%, list=33%, signal=71%
												1004	GOBP_IRON_ION_TRANSPORT	57	-0.43	-1.26	0.076	0.326	1	6899	tags=53%, list=36%, signal=82%
												1005	GOBP_REGULATION_OF_ERYTHROCYTE_DIFFERENTIATION	50	-0.44	-1.26	0.074	0.326	1	6893	tags=54%, list=36%, signal=84%
												1006	GOBP_GOLGI_VESICLE_TRANSPORT	274	-0.4	-1.26	0.001	0.327	1	7584	tags=57%, list=40%, signal=92%
												1007	GOBP_FEEDING_BEHAVIOR	128	-0.41	-1.26	0.03	0.327	1	2913	tags=25%, list=15%, signal=29%
												1008	GOBP_CELLULAR_RESPONSE_TO_ETHANOL	17	-0.51	-1.26	0.136	0.328	1	5867	tags=41%, list=31%, signal=59%
												1009	GOBP_POSITIVE_REGULATION_OF_REACTIVE_OXYGEN_SPECIES_BIOSYNTHETIC_PROCESS	24	-0.49	-1.26	0.122	0.328	1	1840	tags=29%, list=10%, signal=32%
												1010	GOBP_EXTRACELLULAR_VESICLE_BIOGENESIS	24	-0.48	-1.26	0.122	0.328	1	3503	tags=38%, list=18%, signal=46%
												1011	GOBP_RESPONSE_TO_TUMOR_CELL	41	-0.45	-1.26	0.11	0.328	1	6976	tags=56%, list=36%, signal=88%
												1012	GOBP_PEPTIDYL_ARGININE_MODIFICATION	16	-0.52	-1.26	0.137	0.328	1	7081	tags=69%, list=37%, signal=109%
												1013	GOBP_PEPTIDYL_SERINE_MODIFICATION	314	-0.4	-1.26	0.001	0.328	1	7744	tags=54%, list=40%, signal=90%
												1014	GOBP_REGULATION_OF_LIPOPROTEIN_METABOLIC_PROCESS	19	-0.51	-1.26	0.119	0.328	1	3464	tags=37%, list=18%, signal=45%
												1015	GOBP_NEGATIVE_REGULATION_OF_DNA_DAMAGE_RESPONSE_SIGNAL_TRANSDUCTION_BY_P53_CLASS_MEDIATOR	15	-0.53	-1.26	0.149	0.328	1	2088	tags=27%, list=11%, signal=30%
												1016	GOBP_REACTIVE_OXYGEN_SPECIES_BIOSYNTHETIC_PROCESS	62	-0.43	-1.26	0.066	0.328	1	5663	tags=42%, list=30%, signal=59%
												1017	GOBP_VIRAL_LIFE_CYCLE	228	-0.4	-1.26	0.003	0.328	1	7579	tags=53%, list=40%, signal=86%
												1018	GOBP_RESPONSE_TO_FORSKOLIN	44	-0.45	-1.26	0.098	0.328	1	3627	tags=18%, list=19%, signal=22%
												1019	GOBP_PHENOL_CONTAINING_COMPOUND_METABOLIC_PROCESS	124	-0.41	-1.26	0.022	0.328	1	5051	tags=37%, list=26%, signal=50%
												1020	GOBP_REGULATION_OF_ERBB_SIGNALING_PATHWAY	68	-0.43	-1.26	0.06	0.329	1	8604	tags=63%, list=45%, signal=114%
												1021	GOBP_SYNAPTIC_TRANSMISSION_GLUTAMATERGIC	128	-0.41	-1.26	0.018	0.329	1	5620	tags=43%, list=29%, signal=60%
												1022	GOBP_NEUROEPITHELIAL_CELL_DIFFERENTIATION	46	-0.44	-1.26	0.081	0.329	1	5976	tags=50%, list=31%, signal=72%
												1023	GOBP_STEROID_HORMONE_MEDIATED_SIGNALING_PATHWAY	119	-0.42	-1.26	0.027	0.33	1	7315	tags=55%, list=38%, signal=88%
												1024	GOBP_NEGATIVE_REGULATION_OF_TOR_SIGNALING	68	-0.43	-1.26	0.073	0.33	1	6608	tags=53%, list=34%, signal=80%
												1025	GOBP_POSITIVE_REGULATION_OF_MEMBRANE_PROTEIN_ECTODOMAIN_PROTEOLYSIS	16	-0.51	-1.26	0.143	0.33	1	6999	tags=63%, list=36%, signal=98%
												1026	GOBP_CELLULAR_RESPONSE_TO_BIOTIC_STIMULUS	257	-0.4	-1.26	0.002	0.33	1	5719	tags=36%, list=30%, signal=50%
												1027	GOBP_NEGATIVE_REGULATION_OF_MICROTUBULE_POLYMERIZATION_OR_DEPOLYMERIZATION	49	-0.44	-1.26	0.084	0.329	1	6617	tags=55%, list=35%, signal=84%
												1028	GOBP_REPRODUCTIVE_BEHAVIOR	60	-0.43	-1.26	0.064	0.33	1	6986	tags=50%, list=36%, signal=78%
												1029	GOBP_CARDIAC_NEURAL_CREST_CELL_DEVELOPMENT_INVOLVED_IN_OUTFLOW_TRACT_MORPHOGENESIS	15	-0.52	-1.26	0.139	0.33	1	2406	tags=40%, list=13%, signal=46%
												1030	GOBP_SYNAPTIC_VESICLE_LUMEN_ACIDIFICATION	17	-0.51	-1.26	0.129	0.33	1	4363	tags=47%, list=23%, signal=61%
												1031	GOBP_RESPONSE_TO_DEXAMETHASONE	31	-0.47	-1.26	0.115	0.33	1	7311	tags=58%, list=38%, signal=94%
												1032	GOBP_POSITIVE_REGULATION_OF_MYELOID_LEUKOCYTE_CYTOKINE_PRODUCTION_INVOLVED_IN_IMMUNE_RESPONSE	40	-0.45	-1.26	0.102	0.331	1	5741	tags=50%, list=30%, signal=71%
												1033	GOBP_REGULATION_OF_INTRACELLULAR_PROTEIN_TRANSPORT	225	-0.4	-1.26	0.006	0.331	1	6854	tags=52%, list=36%, signal=79%
												1034	GOBP_REGULATION_OF_VASCULATURE_DEVELOPMENT	299	-0.4	-1.26	0	0.331	1	6909	tags=46%, list=36%, signal=72%
												1035	GOBP_MYOTUBE_DIFFERENTIATION	138	-0.41	-1.26	0.019	0.332	1	5569	tags=41%, list=29%, signal=57%
												1036	GOBP_REGULATION_OF_CARDIAC_MUSCLE_CONTRACTION	68	-0.43	-1.26	0.054	0.332	1	6488	tags=53%, list=34%, signal=80%
												1037	GOBP_REGULATION_OF_UBIQUITIN_DEPENDENT_PROTEIN_CATABOLIC_PROCESS	166	-0.41	-1.26	0.014	0.332	1	7170	tags=52%, list=37%, signal=82%
												1038	GOBP_VASCULAR_PROCESS_IN_CIRCULATORY_SYSTEM	242	-0.4	-1.26	0.004	0.332	1	7347	tags=54%, list=38%, signal=86%
												1039	GOBP_REGULATION_OF_CAMP_MEDIATED_SIGNALING	46	-0.45	-1.26	0.078	0.332	1	3416	tags=37%, list=18%, signal=45%
												1040	GOBP_TETRAHYDROFOLATE_METABOLIC_PROCESS	16	-0.51	-1.26	0.158	0.332	1	7196	tags=69%, list=38%, signal=110%
												1041	GOBP_REGULATION_OF_CALCIUM_ION_IMPORT	33	-0.46	-1.26	0.134	0.332	1	4532	tags=48%, list=24%, signal=63%
												1042	GOBP_CANONICAL_WNT_SIGNALING_PATHWAY	299	-0.4	-1.26	0.001	0.332	1	7712	tags=54%, list=40%, signal=89%
												1043	GOBP_REGULATION_OF_SKELETAL_MUSCLE_TISSUE_DEVELOPMENT	32	-0.46	-1.26	0.121	0.332	1	5407	tags=50%, list=28%, signal=70%
												1044	GOBP_CELLULAR_EXTRAVASATION	76	-0.43	-1.26	0.052	0.332	1	5259	tags=42%, list=27%, signal=58%
												1045	GOBP_POSITIVE_REGULATION_OF_DNA_DAMAGE_RESPONSE_SIGNAL_TRANSDUCTION_BY_P53_CLASS_MEDIATOR	15	-0.52	-1.26	0.145	0.331	1	7112	tags=67%, list=37%, signal=106%
												1046	GOBP_RESPONSE_TO_CALCIUM_ION	142	-0.41	-1.26	0.021	0.331	1	6756	tags=47%, list=35%, signal=72%
												1047	GOBP_EMBRYONIC_HEART_TUBE_MORPHOGENESIS	70	-0.42	-1.26	0.054	0.331	1	7087	tags=56%, list=37%, signal=88%
												1048	GOBP_POSITIVE_REGULATION_OF_INTERFERON_BETA_PRODUCTION	47	-0.44	-1.26	0.086	0.331	1	7476	tags=57%, list=39%, signal=94%
												1049	GOBP_RNA_DESTABILIZATION	96	-0.42	-1.26	0.041	0.331	1	6131	tags=48%, list=32%, signal=70%
												1050	GOBP_IMPORT_ACROSS_PLASMA_MEMBRANE	206	-0.4	-1.26	0.007	0.331	1	6799	tags=50%, list=35%, signal=76%
												1051	GOBP_CELL_MIGRATION_INVOLVED_IN_SPROUTING_ANGIOGENESIS	54	-0.44	-1.25	0.077	0.331	1	3619	tags=35%, list=19%, signal=43%
												1052	GOBP_REGULATION_OF_PROGRAMMED_NECROTIC_CELL_DEATH	28	-0.47	-1.25	0.13	0.332	1	2121	tags=29%, list=11%, signal=32%
												1053	GOBP_CELLULAR_RESPONSE_TO_VASCULAR_ENDOTHELIAL_GROWTH_FACTOR_STIMULUS	59	-0.44	-1.25	0.08	0.332	1	6909	tags=53%, list=36%, signal=82%
												1054	GOBP_NEGATIVE_REGULATION_OF_VIRAL_TRANSCRIPTION	17	-0.51	-1.25	0.142	0.332	1	5571	tags=59%, list=29%, signal=83%
												1055	GOBP_ENTRY_INTO_HOST	94	-0.42	-1.25	0.041	0.332	1	4508	tags=34%, list=24%, signal=44%
												1056	GOBP_PHOSPHATIDYLETHANOLAMINE_METABOLIC_PROCESS	26	-0.47	-1.25	0.133	0.333	1	6222	tags=54%, list=32%, signal=80%
												1057	GOBP_RESPONSE_TO_LEPTIN	19	-0.5	-1.25	0.147	0.334	1	7805	tags=84%, list=41%, signal=142%
												1058	GOBP_REGULATION_OF_HEART_CONTRACTION	193	-0.4	-1.25	0.019	0.334	1	4946	tags=38%, list=26%, signal=51%
												1059	GOBP_RESPONSE_TO_UV_A	16	-0.52	-1.25	0.123	0.334	1	7219	tags=50%, list=38%, signal=80%
												1060	GOBP_REGULATION_OF_INTEGRIN_MEDIATED_SIGNALING_PATHWAY	21	-0.49	-1.25	0.141	0.334	1	5160	tags=52%, list=27%, signal=72%
												1061	GOBP_PROTEIN_REFOLDING	21	-0.49	-1.25	0.137	0.333	1	6568	tags=57%, list=34%, signal=87%
												1062	GOBP_NEGATIVE_REGULATION_OF_CELL_PROJECTION_ORGANIZATION	217	-0.4	-1.25	0.005	0.333	1	5511	tags=42%, list=29%, signal=59%
												1063	GOBP_NEURON_MIGRATION	207	-0.41	-1.25	0.007	0.333	1	6485	tags=51%, list=34%, signal=76%
												1064	GOBP_REFLEX	30	-0.46	-1.25	0.115	0.334	1	4440	tags=40%, list=23%, signal=52%
												1065	GOBP_SEMINIFEROUS_TUBULE_DEVELOPMENT	21	-0.49	-1.25	0.149	0.334	1	6148	tags=52%, list=32%, signal=77%
												1066	GOBP_POSITIVE_REGULATION_OF_PROTEIN_TYROSINE_KINASE_ACTIVITY	38	-0.45	-1.25	0.11	0.334	1	6976	tags=63%, list=36%, signal=99%
												1067	GOBP_RIG_I_SIGNALING_PATHWAY	24	-0.48	-1.25	0.115	0.335	1	5527	tags=50%, list=29%, signal=70%
												1068	GOBP_NEGATIVE_REGULATION_OF_SMOOTH_MUSCLE_CELL_MIGRATION	36	-0.45	-1.25	0.12	0.335	1	7108	tags=61%, list=37%, signal=97%
												1069	GOBP_NUCLEAR_BODY_ORGANIZATION	17	-0.5	-1.25	0.128	0.334	1	1713	tags=29%, list=9%, signal=32%
												1070	GOBP_NEGATIVE_REGULATION_OF_EXTRINSIC_APOPTOTIC_SIGNALING_PATHWAY_VIA_DEATH_DOMAIN_RECEPTORS	27	-0.47	-1.25	0.127	0.336	1	3267	tags=33%, list=17%, signal=40%
												1071	GOBP_PHOTORECEPTOR_CELL_DIFFERENTIATION	83	-0.42	-1.25	0.05	0.336	1	7562	tags=53%, list=39%, signal=87%
												1072	GOBP_REGULATION_OF_RELAXATION_OF_MUSCLE	17	-0.51	-1.25	0.155	0.337	1	7178	tags=47%, list=37%, signal=75%
												1073	GOBP_NEGATIVE_REGULATION_OF_PHOSPHATASE_ACTIVITY	33	-0.46	-1.25	0.119	0.336	1	7684	tags=61%, list=40%, signal=101%
												1074	GOBP_POSITIVE_REGULATION_OF_LEUKOCYTE_MEDIATED_IMMUNITY	149	-0.41	-1.25	0.015	0.336	1	6942	tags=50%, list=36%, signal=77%
												1075	GOBP_RENAL_TUBULE_DEVELOPMENT	111	-0.41	-1.25	0.033	0.336	1	3127	tags=28%, list=16%, signal=33%
												1076	GOBP_RENAL_TUBULE_MORPHOGENESIS	91	-0.42	-1.25	0.041	0.336	1	3127	tags=27%, list=16%, signal=33%
												1077	GOBP_EATING_BEHAVIOR	52	-0.44	-1.25	0.068	0.336	1	2628	tags=27%, list=14%, signal=31%
												1078	GOBP_POSITIVE_REGULATION_OF_TRANSPORTER_ACTIVITY	130	-0.41	-1.25	0.022	0.336	1	4194	tags=34%, list=22%, signal=43%
												1079	GOBP_POSITIVE_REGULATION_OF_MAP_KINASE_ACTIVITY	129	-0.41	-1.25	0.03	0.336	1	6967	tags=53%, list=36%, signal=83%
												1080	GOBP_EYE_PHOTORECEPTOR_CELL_DEVELOPMENT	44	-0.44	-1.25	0.09	0.336	1	2588	tags=27%, list=13%, signal=31%
												1081	GOBP_CEREBELLAR_PURKINJE_CELL_LAYER_DEVELOPMENT	39	-0.45	-1.25	0.096	0.336	1	7209	tags=62%, list=38%, signal=98%
												1082	GOBP_DEOXYRIBONUCLEOTIDE_BIOSYNTHETIC_PROCESS	17	-0.52	-1.25	0.153	0.336	1	7181	tags=65%, list=37%, signal=103%
												1083	GOBP_AMYLOID_BETA_CLEARANCE	36	-0.45	-1.25	0.125	0.336	1	5566	tags=50%, list=29%, signal=70%
												1084	GOBP_EXTRACELLULAR_MATRIX_ASSEMBLY	43	-0.44	-1.25	0.098	0.335	1	6862	tags=56%, list=36%, signal=87%
												1085	GOBP_REGULATION_OF_FIBROBLAST_APOPTOTIC_PROCESS	24	-0.48	-1.25	0.127	0.335	1	6122	tags=50%, list=32%, signal=73%
												1086	GOBP_CELLULAR_RESPONSE_TO_OSMOTIC_STRESS	54	-0.44	-1.25	0.09	0.335	1	4021	tags=31%, list=21%, signal=40%
												1087	GOBP_NEGATIVE_REGULATION_OF_RHO_PROTEIN_SIGNAL_TRANSDUCTION	25	-0.48	-1.25	0.123	0.335	1	9034	tags=84%, list=47%, signal=159%
												1088	GOBP_NEGATIVE_REGULATION_OF_CELL_DIVISION	15	-0.52	-1.25	0.165	0.335	1	5910	tags=53%, list=31%, signal=77%
												1089	GOBP_ENDOCARDIAL_CUSHION_DEVELOPMENT	54	-0.44	-1.25	0.084	0.335	1	7409	tags=59%, list=39%, signal=96%
												1090	GOBP_CATECHOLAMINE_SECRETION	78	-0.42	-1.25	0.055	0.335	1	3423	tags=35%, list=18%, signal=42%
												1091	GOBP_ENDOCARDIAL_CUSHION_MORPHOGENESIS	42	-0.44	-1.25	0.115	0.335	1	2911	tags=33%, list=15%, signal=39%
												1092	GOBP_MULTICELLULAR_ORGANISMAL_LEVEL_CHEMICAL_HOMEOSTASIS	82	-0.42	-1.25	0.046	0.335	1	4101	tags=34%, list=21%, signal=43%
												1093	GOBP_TELOMERE_MAINTENANCE_VIA_RECOMBINATION	15	-0.52	-1.25	0.154	0.334	1	7168	tags=53%, list=37%, signal=85%
												1094	GOBP_REGULATION_OF_EPITHELIAL_CELL_MIGRATION	246	-0.4	-1.25	0.006	0.335	1	7090	tags=53%, list=37%, signal=83%
												1095	GOBP_CALCIUM_ION_REGULATED_EXOCYTOSIS	76	-0.42	-1.25	0.067	0.334	1	4412	tags=41%, list=23%, signal=53%
												1096	GOBP_TOLL_LIKE_RECEPTOR_2_SIGNALING_PATHWAY	17	-0.51	-1.25	0.162	0.335	1	7596	tags=65%, list=40%, signal=107%
												1097	GOBP_NEGATIVE_REGULATION_OF_CELL_SUBSTRATE_JUNCTION_ORGANIZATION	16	-0.52	-1.25	0.157	0.335	1	4709	tags=44%, list=25%, signal=58%
												1098	GOBP_MAGNESIUM_ION_HOMEOSTASIS	16	-0.51	-1.25	0.165	0.335	1	6213	tags=56%, list=32%, signal=83%
												1099	GOBP_PROSTAGLANDIN_SECRETION	20	-0.49	-1.25	0.154	0.335	1	5741	tags=45%, list=30%, signal=64%
												1100	GOBP_CELL_JUNCTION_MAINTENANCE	52	-0.43	-1.25	0.088	0.334	1	4936	tags=40%, list=26%, signal=54%
												1101	GOBP_REGULATION_OF_DNA_TEMPLATED_TRANSCRIPTION_INITIATION	82	-0.42	-1.25	0.054	0.334	1	6773	tags=50%, list=35%, signal=77%
												1102	GOBP_SENSORY_ORGAN_MORPHOGENESIS	319	-0.39	-1.25	0	0.335	1	7714	tags=53%, list=40%, signal=87%
												1103	GOBP_LIPID_DROPLET_ORGANIZATION	36	-0.45	-1.25	0.125	0.335	1	6634	tags=56%, list=35%, signal=85%
												1104	GOBP_RESPONSE_TO_HISTAMINE	16	-0.51	-1.25	0.164	0.335	1	1125	tags=19%, list=6%, signal=20%
												1105	GOBP_REGULATION_OF_CANONICAL_NF_KAPPAB_SIGNAL_TRANSDUCTION	196	-0.4	-1.25	0.008	0.335	1	7677	tags=57%, list=40%, signal=93%
												1106	GOBP_REGULATION_OF_PROTEASOMAL_UBIQUITIN_DEPENDENT_PROTEIN_CATABOLIC_PROCESS	135	-0.41	-1.25	0.026	0.337	1	7131	tags=53%, list=37%, signal=83%
												1107	GOBP_NUCLEOSIDE_DIPHOSPHATE_METABOLIC_PROCESS	30	-0.47	-1.25	0.117	0.337	1	4500	tags=40%, list=23%, signal=52%
												1108	GOBP_CORTICOSTEROID_HORMONE_SECRETION	22	-0.49	-1.25	0.144	0.337	1	140	tags=14%, list=1%, signal=14%
												1109	GOBP_TRANSMEMBRANE_RECEPTOR_PROTEIN_SERINE_THREONINE_KINASE_SIGNALING_PATHWAY	388	-0.39	-1.25	0	0.337	1	4748	tags=36%, list=25%, signal=46%
												1110	GOBP_RESPONSE_TO_ALKALOID	76	-0.42	-1.25	0.059	0.336	1	7133	tags=51%, list=37%, signal=81%
												1111	GOBP_ORGANELLE_DISASSEMBLY	135	-0.41	-1.25	0.025	0.337	1	6634	tags=52%, list=35%, signal=79%
												1112	GOBP_SEMAPHORIN_PLEXIN_SIGNALING_PATHWAY	48	-0.44	-1.25	0.099	0.337	1	8694	tags=63%, list=45%, signal=114%
												1113	GOBP_CARDIAC_NEURAL_CREST_CELL_DIFFERENTIATION_INVOLVED_IN_HEART_DEVELOPMENT	19	-0.49	-1.25	0.151	0.337	1	2406	tags=37%, list=13%, signal=42%
												1114	GOBP_REGULATION_OF_HEART_RATE	108	-0.41	-1.25	0.043	0.338	1	7347	tags=50%, list=38%, signal=81%
												1115	GOBP_INNATE_IMMUNE_RESPONSE_ACTIVATING_CELL_SURFACE_RECEPTOR_SIGNALING_PATHWAY	78	-0.42	-1.25	0.062	0.338	1	6706	tags=46%, list=35%, signal=71%
												1116	GOBP_REGULATION_OF_DENDRITE_DEVELOPMENT	140	-0.4	-1.25	0.024	0.338	1	7367	tags=52%, list=38%, signal=84%
												1117	GOBP_VASCULAR_ENDOTHELIAL_CELL_PROLIFERATION	30	-0.46	-1.25	0.122	0.338	1	5347	tags=43%, list=28%, signal=60%
												1118	GOBP_AUDITORY_RECEPTOR_CELL_MORPHOGENESIS	29	-0.47	-1.25	0.126	0.338	1	5229	tags=38%, list=27%, signal=52%
												1119	GOBP_REGULATION_OF_GLYCOPROTEIN_METABOLIC_PROCESS	47	-0.44	-1.25	0.104	0.339	1	7185	tags=55%, list=37%, signal=88%
												1120	GOBP_MORPHOGENESIS_OF_A_POLARIZED_EPITHELIUM	90	-0.41	-1.25	0.057	0.339	1	7488	tags=58%, list=39%, signal=94%
												1121	GOBP_MELANOCYTE_DIFFERENTIATION	28	-0.47	-1.25	0.138	0.339	1	4518	tags=50%, list=24%, signal=65%
												1122	GOBP_REGULATION_OF_CELLULAR_RESPONSE_TO_OXIDATIVE_STRESS	27	-0.47	-1.25	0.124	0.338	1	5597	tags=63%, list=29%, signal=89%
												1123	GOBP_NEGATIVE_REGULATION_OF_TRANSMEMBRANE_RECEPTOR_PROTEIN_SERINE_THREONINE_KINASE_SIGNALING_PATHWAY	145	-0.41	-1.25	0.027	0.338	1	6857	tags=52%, list=36%, signal=80%
												1124	GOBP_MESENCHYMAL_CELL_PROLIFERATION	55	-0.43	-1.25	0.086	0.338	1	4477	tags=38%, list=23%, signal=50%
												1125	GOBP_MITOTIC_METAPHASE_CHROMOSOME_ALIGNMENT	50	-0.44	-1.24	0.1	0.338	1	8753	tags=70%, list=46%, signal=128%
												1126	GOBP_LAMELLIPODIUM_ORGANIZATION	91	-0.42	-1.24	0.045	0.338	1	6428	tags=43%, list=34%, signal=64%
												1127	GOBP_MODIFICATION_OF_SYNAPTIC_STRUCTURE	42	-0.44	-1.24	0.126	0.338	1	7170	tags=57%, list=37%, signal=91%
												1128	GOBP_REGULATION_OF_DNA_DAMAGE_RESPONSE_SIGNAL_TRANSDUCTION_BY_P53_CLASS_MEDIATOR	37	-0.45	-1.24	0.113	0.338	1	7642	tags=54%, list=40%, signal=90%
												1129	GOBP_MICROTUBULE_POLYMERIZATION_OR_DEPOLYMERIZATION	134	-0.41	-1.24	0.024	0.34	1	7279	tags=52%, list=38%, signal=84%
												1130	GOBP_POSITIVE_REGULATION_OF_NF_KAPPAB_TRANSCRIPTION_FACTOR_ACTIVITY	145	-0.41	-1.24	0.022	0.34	1	7820	tags=59%, list=41%, signal=98%
												1131	GOBP_SULFUR_COMPOUND_TRANSPORT	43	-0.44	-1.24	0.1	0.34	1	6012	tags=47%, list=31%, signal=68%
												1132	GOBP_EAR_DEVELOPMENT	254	-0.4	-1.24	0.006	0.34	1	7056	tags=48%, list=37%, signal=74%
												1133	GOBP_ORGANELLE_MEMBRANE_FUSION	125	-0.41	-1.24	0.039	0.34	1	7825	tags=59%, list=41%, signal=99%
												1134	GOBP_COGNITION	357	-0.39	-1.24	0.002	0.34	1	7612	tags=52%, list=40%, signal=85%
												1135	GOBP_POSITIVE_REGULATION_OF_TORC1_SIGNALING	51	-0.44	-1.24	0.094	0.34	1	7295	tags=61%, list=38%, signal=98%
												1136	GOBP_NEPHRON_EPITHELIUM_DEVELOPMENT	118	-0.41	-1.24	0.035	0.341	1	3127	tags=26%, list=16%, signal=31%
												1137	GOBP_ANTIGEN_PROCESSING_AND_PRESENTATION_OF_PEPTIDE_OR_POLYSACCHARIDE_ANTIGEN_VIA_MHC_CLASS_II	25	-0.47	-1.24	0.157	0.34	1	6568	tags=60%, list=34%, signal=91%
												1138	GOBP_REGULATION_OF_PROTEOLYSIS_INVOLVED_IN_PROTEIN_CATABOLIC_PROCESS	221	-0.4	-1.24	0.006	0.341	1	7170	tags=51%, list=37%, signal=80%
												1139	GOBP_POSITIVE_REGULATION_OF_INTRACELLULAR_STEROID_HORMONE_RECEPTOR_SIGNALING_PATHWAY	16	-0.5	-1.24	0.155	0.342	1	9498	tags=88%, list=50%, signal=173%
												1140	GOBP_CELLULAR_RESPONSE_TO_HEAT	50	-0.43	-1.24	0.098	0.342	1	6428	tags=54%, list=34%, signal=81%
												1141	GOBP_RESPONSE_TO_NERVE_GROWTH_FACTOR	41	-0.44	-1.24	0.116	0.342	1	7827	tags=68%, list=41%, signal=115%
												1142	GOBP_POSITIVE_REGULATION_OF_ERBB_SIGNALING_PATHWAY	26	-0.47	-1.24	0.142	0.343	1	8604	tags=65%, list=45%, signal=118%
												1143	GOBP_NERVOUS_SYSTEM_PROCESS_INVOLVED_IN_REGULATION_OF_SYSTEMIC_ARTERIAL_BLOOD_PRESSURE	21	-0.49	-1.24	0.133	0.343	1	4243	tags=33%, list=22%, signal=43%
												1144	GOBP_POSITIVE_REGULATION_OF_MONOATOMIC_ION_TRANSPORT	265	-0.4	-1.24	0.007	0.343	1	4194	tags=32%, list=22%, signal=41%
												1145	GOBP_PRESYNAPTIC_ENDOCYTOSIS	80	-0.42	-1.24	0.066	0.343	1	5125	tags=40%, list=27%, signal=54%
												1146	GOBP_POSITIVE_REGULATION_OF_INTERLEUKIN_8_PRODUCTION	57	-0.43	-1.24	0.086	0.343	1	5197	tags=37%, list=27%, signal=50%
												1147	GOBP_REGULATION_OF_ESTABLISHMENT_OF_PLANAR_POLARITY	43	-0.44	-1.24	0.118	0.343	1	6581	tags=56%, list=34%, signal=85%
												1148	GOBP_DNA_TEMPLATED_TRANSCRIPTION_INITIATION	131	-0.4	-1.24	0.029	0.343	1	6815	tags=50%, list=36%, signal=76%
												1149	GOBP_FOREBRAIN_GENERATION_OF_NEURONS	65	-0.43	-1.24	0.075	0.343	1	4976	tags=45%, list=26%, signal=60%
												1150	GOBP_REGULATION_OF_PROTEIN_DEPOLYMERIZATION	96	-0.41	-1.24	0.05	0.343	1	6617	tags=50%, list=35%, signal=76%
												1151	GOBP_LEUKOCYTE_MEDIATED_CYTOTOXICITY	131	-0.41	-1.24	0.029	0.343	1	7601	tags=53%, list=40%, signal=87%
												1152	GOBP_ADENYLATE_CYCLASE_INHIBITING_G_PROTEIN_COUPLED_RECEPTOR_SIGNALING_PATHWAY	73	-0.42	-1.24	0.066	0.343	1	3627	tags=34%, list=19%, signal=42%
												1153	GOBP_REGULATION_OF_CELL_MORPHOGENESIS	265	-0.39	-1.24	0.003	0.343	1	6863	tags=48%, list=36%, signal=74%
												1154	GOBP_ENDOTHELIAL_CELL_PROLIFERATION	170	-0.4	-1.24	0.012	0.344	1	5362	tags=41%, list=28%, signal=57%
												1155	GOBP_BROWN_FAT_CELL_DIFFERENTIATION	63	-0.43	-1.24	0.088	0.344	1	5979	tags=46%, list=31%, signal=67%
												1156	GOBP_POSITIVE_REGULATION_OF_DEVELOPMENTAL_GROWTH	217	-0.4	-1.24	0.007	0.344	1	6292	tags=45%, list=33%, signal=66%
												1157	GOBP_NEURON_APOPTOTIC_PROCESS	351	-0.39	-1.24	0.001	0.344	1	7006	tags=48%, list=37%, signal=74%
												1158	GOBP_REGULATION_OF_VIRAL_GENOME_REPLICATION	80	-0.42	-1.24	0.058	0.344	1	7360	tags=52%, list=38%, signal=85%
												1159	GOBP_REGULATION_OF_DEFENSE_RESPONSE_TO_VIRUS_BY_HOST	45	-0.44	-1.24	0.103	0.345	1	6873	tags=42%, list=36%, signal=66%
												1160	GOBP_CALCIUM_MEDIATED_SIGNALING_USING_INTRACELLULAR_CALCIUM_SOURCE	22	-0.49	-1.24	0.133	0.345	1	2076	tags=27%, list=11%, signal=31%
												1161	GOBP_CANONICAL_NF_KAPPAB_SIGNAL_TRANSDUCTION	235	-0.4	-1.24	0.004	0.344	1	7677	tags=55%, list=40%, signal=91%
												1162	GOBP_RNA_LOCALIZATION	162	-0.4	-1.24	0.026	0.344	1	9032	tags=65%, list=47%, signal=121%
												1163	GOBP_REGULATION_OF_SMOOTH_MUSCLE_CONTRACTION	69	-0.43	-1.24	0.078	0.344	1	6127	tags=49%, list=32%, signal=72%
												1164	GOBP_RESPONSE_TO_METAL_ION	304	-0.39	-1.24	0.001	0.344	1	6808	tags=46%, list=35%, signal=71%
												1165	GOBP_NEGATIVE_REGULATION_OF_GTPASE_ACTIVITY	31	-0.46	-1.24	0.156	0.344	1	5241	tags=42%, list=27%, signal=58%
												1166	GOBP_NEGATIVE_REGULATION_OF_UBIQUITIN_DEPENDENT_PROTEIN_CATABOLIC_PROCESS	54	-0.42	-1.24	0.095	0.344	1	7410	tags=54%, list=39%, signal=87%
												1167	GOBP_MITOTIC_CELL_CYCLE_PHASE_TRANSITION	440	-0.39	-1.24	0	0.344	1	6828	tags=45%, list=36%, signal=69%
												1168	GOBP_CELLULAR_RESPONSE_TO_GLUCOCORTICOID_STIMULUS	48	-0.44	-1.24	0.089	0.345	1	2299	tags=25%, list=12%, signal=28%
												1169	GOBP_TYPE_I_INTERFERON_PRODUCTION	127	-0.41	-1.24	0.034	0.344	1	7632	tags=55%, list=40%, signal=91%
												1170	GOBP_REGULATION_OF_RYANODINE_SENSITIVE_CALCIUM_RELEASE_CHANNEL_ACTIVITY	16	-0.51	-1.24	0.163	0.344	1	1665	tags=31%, list=9%, signal=34%
												1171	GOBP_METHYLGUANOSINE_CAP_DECAPPING	15	-0.52	-1.24	0.169	0.344	1	8823	tags=93%, list=46%, signal=173%
												1172	GOBP_SKELETAL_MUSCLE_SATELLITE_CELL_PROLIFERATION	17	-0.5	-1.24	0.146	0.344	1	7108	tags=65%, list=37%, signal=103%
												1173	GOBP_REGULATION_OF_AMINO_ACID_TRANSMEMBRANE_TRANSPORT	20	-0.49	-1.24	0.15	0.345	1	5357	tags=55%, list=28%, signal=76%
												1174	GOBP_GOLGI_ORGANIZATION	135	-0.41	-1.24	0.024	0.345	1	6670	tags=50%, list=35%, signal=77%
												1175	GOBP_DE_NOVO_PROTEIN_FOLDING	35	-0.45	-1.24	0.13	0.345	1	5326	tags=49%, list=28%, signal=67%
												1176	GOBP_POSITIVE_REGULATION_OF_DEFENSE_RESPONSE_TO_VIRUS_BY_HOST	33	-0.45	-1.24	0.125	0.345	1	6873	tags=45%, list=36%, signal=71%
												1177	GOBP_MAMMARY_GLAND_MORPHOGENESIS	60	-0.43	-1.24	0.09	0.345	1	7043	tags=57%, list=37%, signal=89%
												1178	GOBP_HINDBRAIN_DEVELOPMENT	174	-0.4	-1.24	0.024	0.345	1	7215	tags=51%, list=38%, signal=80%
												1179	GOBP_REGULATION_OF_WNT_SIGNALING_PATHWAY	320	-0.39	-1.24	0.003	0.345	1	7712	tags=54%, list=40%, signal=88%
												1180	GOBP_SYNAPTIC_VESICLE_PRIMING	27	-0.47	-1.24	0.153	0.345	1	7462	tags=63%, list=39%, signal=103%
												1181	GOBP_HYPEROSMOTIC_RESPONSE	24	-0.47	-1.24	0.161	0.345	1	6799	tags=46%, list=35%, signal=71%
												1182	GOBP_RECEPTOR_LOCALIZATION_TO_SYNAPSE	86	-0.42	-1.24	0.06	0.345	1	6837	tags=52%, list=36%, signal=81%
												1183	GOBP_NEGATIVE_REGULATION_OF_AXON_EXTENSION_INVOLVED_IN_AXON_GUIDANCE	27	-0.46	-1.24	0.142	0.345	1	8030	tags=67%, list=42%, signal=115%
												1184	GOBP_SPINDLE_ASSEMBLY	119	-0.41	-1.24	0.036	0.345	1	7307	tags=55%, list=38%, signal=88%
												1185	GOBP_PROTEIN_AUTOPHOSPHORYLATION	238	-0.4	-1.24	0.009	0.345	1	7668	tags=52%, list=40%, signal=86%
												1186	GOBP_HEART_MORPHOGENESIS	290	-0.39	-1.24	0.008	0.345	1	7118	tags=51%, list=37%, signal=79%
												1187	GOBP_RESPONSE_TO_INORGANIC_SUBSTANCE	494	-0.39	-1.24	0	0.345	1	6808	tags=44%, list=35%, signal=66%
												1188	GOBP_NEGATIVE_REGULATION_OF_STRESS_ACTIVATED_PROTEIN_KINASE_SIGNALING_CASCADE	46	-0.44	-1.24	0.123	0.345	1	6122	tags=43%, list=32%, signal=64%
												1189	GOBP_POSITIVE_REGULATION_OF_VACUOLE_ORGANIZATION	24	-0.47	-1.24	0.144	0.345	1	7544	tags=67%, list=39%, signal=110%
												1190	GOBP_POSITIVE_REGULATION_OF_CANONICAL_WNT_SIGNALING_PATHWAY	107	-0.41	-1.24	0.03	0.345	1	9331	tags=71%, list=49%, signal=138%
												1191	GOBP_ENDODERM_DEVELOPMENT	78	-0.42	-1.24	0.07	0.345	1	3526	tags=35%, list=18%, signal=42%
												1192	GOBP_ANTIGEN_PROCESSING_AND_PRESENTATION	96	-0.41	-1.24	0.054	0.345	1	6568	tags=48%, list=34%, signal=73%
												1193	GOBP_IMP_METABOLIC_PROCESS	24	-0.47	-1.24	0.164	0.344	1	6676	tags=50%, list=35%, signal=77%
												1194	GOBP_FOREBRAIN_DEVELOPMENT	407	-0.39	-1.24	0	0.345	1	7850	tags=56%, list=41%, signal=93%
												1195	GOBP_ESTABLISHMENT_OF_RNA_LOCALIZATION	137	-0.4	-1.24	0.034	0.345	1	9032	tags=66%, list=47%, signal=125%
												1196	GOBP_RAS_PROTEIN_SIGNAL_TRANSDUCTION	334	-0.39	-1.24	0.003	0.346	1	7359	tags=54%, list=38%, signal=86%
												1197	GOBP_REGULATION_OF_TYPE_I_INTERFERON_MEDIATED_SIGNALING_PATHWAY	42	-0.44	-1.24	0.111	0.346	1	6683	tags=45%, list=35%, signal=69%
												1198	GOBP_PROSTATE_GLAND_DEVELOPMENT	53	-0.43	-1.23	0.093	0.346	1	6933	tags=53%, list=36%, signal=83%
												1199	GOBP_TRANS_SYNAPTIC_SIGNALING_MODULATING_SYNAPTIC_TRANSMISSION	15	-0.51	-1.23	0.17	0.346	1	3255	tags=40%, list=17%, signal=48%
												1200	GOBP_POSITIVE_REGULATION_OF_VASCULAR_ENDOTHELIAL_GROWTH_FACTOR_PRODUCTION	26	-0.47	-1.23	0.138	0.346	1	3164	tags=38%, list=16%, signal=46%
												1201	GOBP_REGULATION_OF_BLOOD_VESSEL_ENDOTHELIAL_CELL_MIGRATION	95	-0.41	-1.23	0.065	0.346	1	7090	tags=54%, list=37%, signal=85%
												1202	GOBP_AUTOPHAGY_OF_MITOCHONDRION	89	-0.42	-1.23	0.06	0.346	1	6583	tags=51%, list=34%, signal=77%
												1203	GOBP_MITOTIC_CYTOKINESIS	80	-0.41	-1.23	0.07	0.347	1	7526	tags=54%, list=39%, signal=88%
												1204	GOBP_REGULATION_OF_FILOPODIUM_ASSEMBLY	55	-0.43	-1.23	0.104	0.346	1	6756	tags=45%, list=35%, signal=70%
												1205	GOBP_NEGATIVE_REGULATION_OF_PEPTIDYL_THREONINE_PHOSPHORYLATION	18	-0.5	-1.23	0.171	0.347	1	2977	tags=33%, list=16%, signal=39%
												1206	GOBP_MYELOID_CELL_APOPTOTIC_PROCESS	45	-0.43	-1.23	0.111	0.347	1	7569	tags=64%, list=39%, signal=106%
												1207	GOBP_NUCLEOSIDE_BISPHOSPHATE_BIOSYNTHETIC_PROCESS	39	-0.45	-1.23	0.129	0.347	1	8696	tags=72%, list=45%, signal=131%
												1208	GOBP_PROTEIN_LOCALIZATION_TO_ENDOSOME	28	-0.46	-1.23	0.135	0.347	1	6863	tags=57%, list=36%, signal=89%
												1209	GOBP_OVARIAN_FOLLICLE_DEVELOPMENT	74	-0.42	-1.23	0.083	0.347	1	7523	tags=58%, list=39%, signal=95%
												1210	GOBP_MODULATION_BY_HOST_OF_VIRAL_GENOME_REPLICATION	22	-0.48	-1.23	0.142	0.347	1	9459	tags=91%, list=49%, signal=179%
												1211	GOBP_GOLGI_TO_VACUOLE_TRANSPORT	21	-0.48	-1.23	0.164	0.347	1	9136	tags=86%, list=48%, signal=164%
												1212	GOBP_EMBRYONIC_APPENDAGE_MORPHOGENESIS	143	-0.4	-1.23	0.029	0.347	1	6022	tags=45%, list=31%, signal=66%
												1213	GOBP_REGULATION_OF_RESPONSE_TO_CYTOKINE_STIMULUS	143	-0.4	-1.23	0.024	0.347	1	6828	tags=50%, list=36%, signal=78%
												1214	GOBP_NEGATIVE_REGULATION_OF_NEURON_DIFFERENTIATION	90	-0.41	-1.23	0.066	0.347	1	6069	tags=47%, list=32%, signal=68%
												1215	GOBP_SENSORY_SYSTEM_DEVELOPMENT	421	-0.39	-1.23	0.002	0.347	1	7714	tags=51%, list=40%, signal=83%
												1216	GOBP_NEGATIVE_REGULATION_OF_LIPID_BIOSYNTHETIC_PROCESS	63	-0.42	-1.23	0.092	0.347	1	5657	tags=41%, list=29%, signal=58%
												1217	GOBP_INTRACELLULAR_ESTROGEN_RECEPTOR_SIGNALING_PATHWAY	47	-0.43	-1.23	0.104	0.348	1	7897	tags=60%, list=41%, signal=101%
												1218	GOBP_POSITIVE_REGULATION_OF_EXTRINSIC_APOPTOTIC_SIGNALING_PATHWAY	60	-0.42	-1.23	0.092	0.348	1	6685	tags=55%, list=35%, signal=84%
												1219	GOBP_POSITIVE_REGULATION_OF_MYOBLAST_FUSION	18	-0.5	-1.23	0.149	0.348	1	8313	tags=78%, list=43%, signal=137%
												1220	GOBP_PHOSPHATIDYLINOSITOL_3_KINASE_PROTEIN_KINASE_B_SIGNAL_TRANSDUCTION	304	-0.39	-1.23	0.006	0.348	1	7290	tags=51%, list=38%, signal=80%
												1221	GOBP_POSITIVE_REGULATION_OF_TYPE_I_INTERFERON_PRODUCTION	76	-0.42	-1.23	0.073	0.348	1	7798	tags=55%, list=41%, signal=93%
												1222	GOBP_REGULATION_OF_MAMMARY_GLAND_EPITHELIAL_CELL_PROLIFERATION	19	-0.5	-1.23	0.164	0.348	1	3030	tags=32%, list=16%, signal=37%
												1223	GOBP_PROTEIN_MONOUBIQUITINATION	57	-0.43	-1.23	0.081	0.348	1	4088	tags=39%, list=21%, signal=49%
												1224	GOBP_REGULATION_OF_CYSTEINE_TYPE_ENDOPEPTIDASE_ACTIVITY_INVOLVED_IN_APOPTOTIC_SIGNALING_PATHWAY	17	-0.5	-1.23	0.166	0.348	1	6862	tags=53%, list=36%, signal=82%
												1225	GOBP_AXIS_ELONGATION	35	-0.44	-1.23	0.139	0.348	1	6646	tags=54%, list=35%, signal=83%
												1226	GOBP_ARGININE_METABOLIC_PROCESS	19	-0.49	-1.23	0.181	0.35	1	6468	tags=58%, list=34%, signal=87%
												1227	GOBP_REGULATION_OF_CELL_KILLING	110	-0.41	-1.23	0.042	0.35	1	7721	tags=54%, list=40%, signal=89%
												1228	GOBP_GLYCEROPHOSPHOLIPID_BIOSYNTHETIC_PROCESS	165	-0.4	-1.23	0.014	0.35	1	7553	tags=54%, list=39%, signal=88%
												1229	GOBP_NEGATIVE_REGULATION_OF_PEPTIDE_SECRETION	71	-0.42	-1.23	0.082	0.349	1	4748	tags=41%, list=25%, signal=54%
												1230	GOBP_NEGATIVE_REGULATION_OF_GROWTH	255	-0.39	-1.23	0.012	0.349	1	5488	tags=40%, list=29%, signal=55%
												1231	GOBP_ESTABLISHMENT_OF_PROTEIN_LOCALIZATION_TO_PLASMA_MEMBRANE	66	-0.42	-1.23	0.1	0.349	1	5562	tags=47%, list=29%, signal=66%
												1232	GOBP_MAMMARY_GLAND_DEVELOPMENT	154	-0.4	-1.23	0.029	0.349	1	7043	tags=44%, list=37%, signal=68%
												1233	GOBP_NEGATIVE_REGULATION_OF_MEMBRANE_POTENTIAL	18	-0.49	-1.23	0.175	0.349	1	5357	tags=50%, list=28%, signal=69%
												1234	GOBP_INTERNAL_PROTEIN_AMINO_ACID_ACETYLATION	66	-0.42	-1.23	0.094	0.349	1	7243	tags=52%, list=38%, signal=82%
												1235	GOBP_CORTICAL_ACTIN_CYTOSKELETON_ORGANIZATION	41	-0.44	-1.23	0.112	0.351	1	6168	tags=41%, list=32%, signal=61%
												1236	GOBP_POSITIVE_REGULATION_OF_BLOOD_PRESSURE	55	-0.43	-1.23	0.104	0.35	1	4373	tags=33%, list=23%, signal=42%
												1237	GOBP_REGULATION_OF_CELL_SHAPE	136	-0.4	-1.23	0.031	0.35	1	6863	tags=49%, list=36%, signal=75%
												1238	GOBP_PARAXIAL_MESODERM_DEVELOPMENT	24	-0.47	-1.23	0.161	0.352	1	8584	tags=75%, list=45%, signal=136%
												1239	GOBP_FOREBRAIN_NEURON_DIFFERENTIATION	53	-0.43	-1.23	0.086	0.352	1	4976	tags=45%, list=26%, signal=61%
												1240	GOBP_NEUROMUSCULAR_SYNAPTIC_TRANSMISSION	33	-0.45	-1.23	0.131	0.352	1	2840	tags=30%, list=15%, signal=36%
												1241	GOBP_NUCLEAR_TRANSCRIBED_MRNA_POLY_A_TAIL_SHORTENING	27	-0.46	-1.23	0.152	0.351	1	8004	tags=63%, list=42%, signal=108%
												1242	GOBP_POSITIVE_REGULATION_OF_SODIUM_ION_TRANSMEMBRANE_TRANSPORT	25	-0.47	-1.23	0.173	0.351	1	4503	tags=40%, list=23%, signal=52%
												1243	GOBP_REGULATION_OF_MITOPHAGY	18	-0.5	-1.23	0.161	0.351	1	4534	tags=39%, list=24%, signal=51%
												1244	GOBP_CORTICOSTEROID_RECEPTOR_SIGNALING_PATHWAY	17	-0.5	-1.23	0.172	0.351	1	7141	tags=59%, list=37%, signal=94%
												1245	GOBP_REGULATION_OF_GTP_BINDING	21	-0.48	-1.23	0.159	0.351	1	2532	tags=33%, list=13%, signal=38%
												1246	GOBP_INNER_EAR_RECEPTOR_CELL_STEREOCILIUM_ORGANIZATION	48	-0.44	-1.23	0.115	0.351	1	4152	tags=33%, list=22%, signal=42%
												1247	GOBP_HIPPOCAMPUS_DEVELOPMENT	82	-0.41	-1.23	0.074	0.351	1	8635	tags=67%, list=45%, signal=121%
												1248	GOBP_METENCEPHALON_DEVELOPMENT	123	-0.4	-1.23	0.047	0.351	1	7215	tags=52%, list=38%, signal=83%
												1249	GOBP_PHARYNGEAL_SYSTEM_DEVELOPMENT	32	-0.45	-1.23	0.129	0.351	1	2950	tags=34%, list=15%, signal=41%
												1250	GOBP_PROTEIN_INSERTION_INTO_MEMBRANE	61	-0.43	-1.23	0.102	0.351	1	3033	tags=28%, list=16%, signal=33%
												1251	GOBP_GLAND_DEVELOPMENT	471	-0.38	-1.23	0	0.351	1	7118	tags=45%, list=37%, signal=70%
												1252	GOBP_ESTABLISHMENT_OF_CELL_POLARITY	161	-0.4	-1.23	0.026	0.351	1	7304	tags=50%, list=38%, signal=81%
												1253	GOBP_NEGATIVE_REGULATION_OF_EPITHELIAL_CELL_APOPTOTIC_PROCESS	75	-0.41	-1.23	0.09	0.351	1	5407	tags=41%, list=28%, signal=57%
												1254	GOBP_NEGATIVE_REGULATION_OF_SMOOTH_MUSCLE_CELL_PROLIFERATION	68	-0.42	-1.23	0.09	0.351	1	7326	tags=50%, list=38%, signal=81%
												1255	GOBP_GLIAL_CELL_DIFFERENTIATION	285	-0.39	-1.23	0.002	0.351	1	7295	tags=54%, list=38%, signal=85%
												1256	GOBP_ENDOSOMAL_TRANSPORT	235	-0.39	-1.23	0.013	0.351	1	5949	tags=47%, list=31%, signal=68%
												1257	GOBP_ACTIN_FILAMENT_BASED_MOVEMENT	127	-0.4	-1.23	0.046	0.351	1	3801	tags=33%, list=20%, signal=41%
												1258	GOBP_MULTICELLULAR_ORGANISM_GROWTH	215	-0.39	-1.23	0.011	0.351	1	7850	tags=53%, list=41%, signal=89%
												1259	GOBP_REGULATION_OF_PROTEASOMAL_PROTEIN_CATABOLIC_PROCESS	186	-0.4	-1.23	0.018	0.351	1	7131	tags=51%, list=37%, signal=80%
												1260	GOBP_POSITIVE_REGULATION_OF_MONOATOMIC_ION_TRANSMEMBRANE_TRANSPORT	199	-0.4	-1.23	0.013	0.351	1	4194	tags=31%, list=22%, signal=39%
												1261	GOBP_NADPH_REGENERATION	21	-0.47	-1.23	0.167	0.351	1	6183	tags=52%, list=32%, signal=77%
												1262	GOBP_EMBRYONIC_HINDLIMB_MORPHOGENESIS	35	-0.44	-1.23	0.149	0.352	1	6022	tags=54%, list=31%, signal=79%
												1263	GOBP_POSITIVE_REGULATION_OF_PROTEIN_UBIQUITINATION	111	-0.41	-1.23	0.049	0.353	1	6886	tags=52%, list=36%, signal=81%
												1264	GOBP_REGULATION_OF_GTPASE_ACTIVITY	338	-0.39	-1.23	0.007	0.352	1	7434	tags=49%, list=39%, signal=79%
												1265	GOBP_NEGATIVE_REGULATION_OF_PROTEOLYSIS_INVOLVED_IN_PROTEIN_CATABOLIC_PROCESS	69	-0.42	-1.23	0.088	0.353	1	7127	tags=54%, list=37%, signal=85%
												1266	GOBP_BRAIN_MORPHOGENESIS	46	-0.44	-1.23	0.109	0.353	1	5006	tags=41%, list=26%, signal=56%
												1267	GOBP_SUBSTRATE_ADHESION_DEPENDENT_CELL_SPREADING	102	-0.41	-1.23	0.054	0.353	1	3286	tags=32%, list=17%, signal=39%
												1268	GOBP_REGULATION_OF_TRANSLATIONAL_INITIATION	60	-0.42	-1.23	0.103	0.353	1	3708	tags=35%, list=19%, signal=43%
												1269	GOBP_CELLULAR_RESPONSE_TO_OXYGEN_RADICAL	20	-0.48	-1.23	0.181	0.353	1	7003	tags=70%, list=37%, signal=110%
												1270	GOBP_LATE_ENDOSOME_TO_VACUOLE_TRANSPORT	26	-0.47	-1.23	0.156	0.353	1	8750	tags=73%, list=46%, signal=134%
												1271	GOBP_WOUND_HEALING_SPREADING_OF_EPIDERMAL_CELLS	20	-0.48	-1.23	0.166	0.353	1	5478	tags=50%, list=29%, signal=70%
												1272	GOBP_RESPONSE_TO_DSRNA	44	-0.44	-1.23	0.124	0.353	1	6218	tags=45%, list=32%, signal=67%
												1273	GOBP_INNER_EAR_MORPHOGENESIS	123	-0.4	-1.23	0.037	0.353	1	4365	tags=30%, list=23%, signal=39%
												1274	GOBP_REGULATION_OF_MICROTUBULE_BASED_PROCESS	258	-0.39	-1.23	0.011	0.353	1	7465	tags=52%, list=39%, signal=83%
												1275	GOBP_NEPHRON_DEVELOPMENT	160	-0.4	-1.23	0.021	0.354	1	7220	tags=49%, list=38%, signal=78%
												1276	GOBP_POSITIVE_REGULATION_OF_MYOBLAST_PROLIFERATION	16	-0.5	-1.23	0.182	0.354	1	7953	tags=75%, list=41%, signal=128%
												1277	GOBP_PEPTIDYL_TYROSINE_MODIFICATION	315	-0.39	-1.22	0.006	0.354	1	8098	tags=56%, list=42%, signal=95%
												1278	GOBP_MODIFIED_AMINO_ACID_TRANSPORT	46	-0.43	-1.22	0.113	0.354	1	2406	tags=24%, list=13%, signal=27%
												1279	GOBP_NEURAL_RETINA_DEVELOPMENT	86	-0.41	-1.22	0.074	0.354	1	7714	tags=57%, list=40%, signal=95%
												1280	GOBP_POSITIVE_REGULATION_OF_AXON_EXTENSION	54	-0.43	-1.22	0.11	0.354	1	7782	tags=57%, list=41%, signal=96%
												1281	GOBP_REGULATION_OF_MITOCHONDRIAL_MEMBRANE_POTENTIAL	89	-0.41	-1.22	0.068	0.354	1	5800	tags=39%, list=30%, signal=56%
												1282	GOBP_LACTATE_METABOLIC_PROCESS	22	-0.48	-1.22	0.173	0.354	1	7547	tags=55%, list=39%, signal=90%
												1283	GOBP_SMOOTHENED_SIGNALING_PATHWAY	166	-0.4	-1.22	0.026	0.354	1	9115	tags=66%, list=48%, signal=124%
												1284	GOBP_RENAL_SYSTEM_DEVELOPMENT	342	-0.39	-1.22	0.004	0.354	1	7319	tags=49%, list=38%, signal=78%
												1285	GOBP_MODIFICATION_OF_POSTSYNAPTIC_STRUCTURE	34	-0.45	-1.22	0.132	0.354	1	7170	tags=59%, list=37%, signal=94%
												1286	GOBP_AUTONOMIC_NERVOUS_SYSTEM_DEVELOPMENT	50	-0.43	-1.22	0.113	0.354	1	4942	tags=40%, list=26%, signal=54%
												1287	GOBP_NEGATIVE_REGULATION_OF_RESPONSE_TO_ENDOPLASMIC_RETICULUM_STRESS	41	-0.44	-1.22	0.131	0.354	1	5989	tags=41%, list=31%, signal=60%
												1288	GOBP_ESTABLISHMENT_OF_PROTEIN_LOCALIZATION_TO_ENDOPLASMIC_RETICULUM	43	-0.44	-1.22	0.132	0.354	1	6066	tags=53%, list=32%, signal=78%
												1289	GOBP_PULMONARY_VALVE_DEVELOPMENT	23	-0.47	-1.22	0.157	0.354	1	2033	tags=35%, list=11%, signal=39%
												1290	GOBP_REGULATION_OF_PEPTIDYL_TYROSINE_PHOSPHORYLATION	259	-0.39	-1.22	0.005	0.354	1	6618	tags=46%, list=35%, signal=70%
												1291	GOBP_POSITIVE_REGULATION_OF_CELLULAR_RESPONSE_TO_INSULIN_STIMULUS	35	-0.44	-1.22	0.132	0.354	1	7313	tags=60%, list=38%, signal=97%
												1292	GOBP_NEGATIVE_REGULATION_OF_SYNAPTIC_TRANSMISSION	72	-0.42	-1.22	0.079	0.354	1	8370	tags=65%, list=44%, signal=115%
												1293	GOBP_POSITIVE_REGULATION_OF_ERYTHROCYTE_DIFFERENTIATION	28	-0.46	-1.22	0.156	0.354	1	8334	tags=68%, list=43%, signal=120%
												1294	GOBP_G_PROTEIN_COUPLED_RECEPTOR_SIGNALING_PATHWAY_COUPLED_TO_CYCLIC_NUCLEOTIDE_SECOND_MESSENGER	34	-0.45	-1.22	0.145	0.354	1	3448	tags=35%, list=18%, signal=43%
												1295	GOBP_REGULATION_OF_VACUOLE_ORGANIZATION	55	-0.43	-1.22	0.114	0.354	1	5363	tags=45%, list=28%, signal=63%
												1296	GOBP_IMP_BIOSYNTHETIC_PROCESS	15	-0.5	-1.22	0.181	0.354	1	6676	tags=60%, list=35%, signal=92%
												1297	GOBP_NOSE_DEVELOPMENT	16	-0.5	-1.22	0.188	0.355	1	3166	tags=38%, list=17%, signal=45%
												1298	GOBP_POSITIVE_REGULATION_OF_CATION_TRANSMEMBRANE_TRANSPORT	168	-0.4	-1.22	0.022	0.354	1	4194	tags=31%, list=22%, signal=39%
												1299	GOBP_REGULATION_OF_CANONICAL_WNT_SIGNALING_PATHWAY	247	-0.39	-1.22	0.015	0.354	1	7771	tags=54%, list=41%, signal=90%
												1300	GOBP_NATURAL_KILLER_CELL_MEDIATED_IMMUNITY	78	-0.41	-1.22	0.086	0.354	1	7601	tags=51%, list=40%, signal=85%
												1301	GOBP_MICROTUBULE_BASED_PROTEIN_TRANSPORT	16	-0.5	-1.22	0.17	0.355	1	5885	tags=56%, list=31%, signal=81%
												1302	GOBP_REGULATION_OF_TRANSMEMBRANE_RECEPTOR_PROTEIN_SERINE_THREONINE_KINASE_SIGNALING_PATHWAY	258	-0.39	-1.22	0.006	0.355	1	6862	tags=47%, list=36%, signal=73%
												1303	GOBP_PROTEIN_LOCALIZATION_TO_CELL_PERIPHERY	388	-0.38	-1.22	0.003	0.354	1	6036	tags=42%, list=31%, signal=60%
												1304	GOBP_VESICLE_MEDIATED_TRANSPORT_TO_THE_PLASMA_MEMBRANE	150	-0.4	-1.22	0.041	0.354	1	7722	tags=58%, list=40%, signal=96%
												1305	GOBP_REGULATION_OF_BONE_RESORPTION	54	-0.43	-1.22	0.11	0.354	1	4124	tags=33%, list=22%, signal=42%
												1306	GOBP_SOMATIC_STEM_CELL_POPULATION_MAINTENANCE	86	-0.41	-1.22	0.067	0.355	1	7649	tags=53%, list=40%, signal=89%
												1307	GOBP_THYMUS_DEVELOPMENT	57	-0.42	-1.22	0.115	0.355	1	6670	tags=49%, list=35%, signal=75%
												1308	GOBP_EAR_MORPHOGENESIS	146	-0.4	-1.22	0.039	0.356	1	6660	tags=42%, list=35%, signal=65%
												1309	GOBP_TRABECULA_FORMATION	30	-0.45	-1.22	0.177	0.357	1	6566	tags=57%, list=34%, signal=86%
												1310	GOBP_TRANSMISSION_OF_NERVE_IMPULSE	102	-0.41	-1.22	0.063	0.357	1	6089	tags=42%, list=32%, signal=61%
												1311	GOBP_REGULATION_OF_SISTER_CHROMATID_COHESION	17	-0.49	-1.22	0.18	0.357	1	5993	tags=59%, list=31%, signal=85%
												1312	GOBP_REGULATION_OF_OSSIFICATION	139	-0.4	-1.22	0.04	0.358	1	7576	tags=55%, list=40%, signal=91%
												1313	GOBP_REGULATION_OF_MRNA_CATABOLIC_PROCESS	175	-0.39	-1.22	0.026	0.358	1	7075	tags=49%, list=37%, signal=77%
												1314	GOBP_POSITIVE_REGULATION_OF_VASCULATURE_DEVELOPMENT	173	-0.39	-1.22	0.035	0.358	1	5417	tags=38%, list=28%, signal=53%
												1315	GOBP_NEGATIVE_REGULATION_OF_CATION_CHANNEL_ACTIVITY	42	-0.43	-1.22	0.131	0.358	1	4123	tags=36%, list=21%, signal=45%
												1316	GOBP_POSITIVE_REGULATION_OF_EXCITATORY_POSTSYNAPTIC_POTENTIAL	42	-0.44	-1.22	0.151	0.358	1	6791	tags=50%, list=35%, signal=77%
												1317	GOBP_BODY_FLUID_SECRETION	108	-0.4	-1.22	0.051	0.358	1	2918	tags=23%, list=15%, signal=27%
												1318	GOBP_PHOSPHATIDYLSERINE_METABOLIC_PROCESS	19	-0.49	-1.22	0.177	0.36	1	7392	tags=53%, list=39%, signal=86%
												1319	GOBP_POSITIVE_REGULATION_OF_VIRAL_GENOME_REPLICATION	28	-0.46	-1.22	0.185	0.361	1	7269	tags=61%, list=38%, signal=98%
												1320	GOBP_POSITIVE_REGULATION_OF_KINASE_ACTIVITY	404	-0.38	-1.22	0.003	0.361	1	7601	tags=53%, list=40%, signal=86%
												1321	GOBP_REPRODUCTIVE_SYSTEM_DEVELOPMENT	324	-0.39	-1.22	0.006	0.361	1	6990	tags=46%, list=36%, signal=71%
												1322	GOBP_MACROPHAGE_MIGRATION	65	-0.41	-1.22	0.102	0.361	1	6791	tags=46%, list=35%, signal=71%
												1323	GOBP_TISSUE_MIGRATION	323	-0.39	-1.22	0.006	0.361	1	7809	tags=56%, list=41%, signal=92%
												1324	GOBP_MRNA_TRANSPORT	106	-0.4	-1.22	0.063	0.361	1	8699	tags=64%, list=45%, signal=117%
												1325	GOBP_MESONEPHRIC_TUBULE_MORPHOGENESIS	78	-0.41	-1.22	0.072	0.36	1	6646	tags=42%, list=35%, signal=64%
												1326	GOBP_SIGNAL_TRANSDUCTION_BY_P53_CLASS_MEDIATOR	151	-0.4	-1.22	0.041	0.36	1	7465	tags=49%, list=39%, signal=80%
												1327	GOBP_POSITIVE_REGULATION_OF_PROTEIN_MODIFICATION_BY_SMALL_PROTEIN_CONJUGATION_OR_REMOVAL	136	-0.4	-1.22	0.033	0.36	1	6454	tags=50%, list=34%, signal=75%
												1328	GOBP_PROTEIN_EXIT_FROM_ENDOPLASMIC_RETICULUM	41	-0.44	-1.22	0.133	0.36	1	6818	tags=51%, list=36%, signal=79%
												1329	GOBP_ORGAN_GROWTH	211	-0.39	-1.22	0.018	0.361	1	6782	tags=46%, list=35%, signal=71%
												1330	GOBP_STEM_CELL_DIVISION	43	-0.43	-1.22	0.149	0.361	1	5493	tags=49%, list=29%, signal=68%
												1331	GOBP_POSITIVE_REGULATION_OF_SODIUM_ION_TRANSPORT	44	-0.44	-1.22	0.124	0.361	1	4503	tags=34%, list=23%, signal=44%
												1332	GOBP_CELLULAR_RESPONSE_TO_VIRUS	47	-0.43	-1.22	0.133	0.361	1	6862	tags=49%, list=36%, signal=76%
												1333	GOBP_REGULATION_OF_ODONTOGENESIS	22	-0.47	-1.22	0.17	0.361	1	3113	tags=36%, list=16%, signal=43%
												1334	GOBP_NEGATIVE_REGULATION_OF_LOCOMOTION	347	-0.38	-1.22	0.004	0.362	1	7022	tags=51%, list=37%, signal=79%
												1335	GOBP_ADENYLATE_CYCLASE_MODULATING_G_PROTEIN_COUPLED_RECEPTOR_SIGNALING_PATHWAY	235	-0.39	-1.22	0.021	0.362	1	3883	tags=31%, list=20%, signal=38%
												1336	GOBP_REGULATION_OF_PROTEIN_LOCALIZATION_TO_ENDOSOME	15	-0.51	-1.22	0.186	0.362	1	6863	tags=60%, list=36%, signal=93%
												1337	GOBP_REGULATION_OF_SYNAPTIC_VESICLE_MEMBRANE_ORGANIZATION	18	-0.49	-1.22	0.194	0.362	1	7456	tags=61%, list=39%, signal=100%
												1338	GOBP_NUCLEIC_ACID_PHOSPHODIESTER_BOND_HYDROLYSIS	20	-0.48	-1.22	0.19	0.362	1	2040	tags=30%, list=11%, signal=34%
												1339	GOBP_ATRIAL_SEPTUM_MORPHOGENESIS	17	-0.49	-1.22	0.187	0.362	1	7897	tags=59%, list=41%, signal=100%
												1340	GOBP_ANTIGEN_PROCESSING_AND_PRESENTATION_VIA_MHC_CLASS_IB	17	-0.49	-1.22	0.186	0.362	1	7335	tags=76%, list=38%, signal=124%
												1341	GOBP_PRODUCTION_OF_MOLECULAR_MEDIATOR_INVOLVED_IN_INFLAMMATORY_RESPONSE	100	-0.4	-1.22	0.077	0.363	1	6855	tags=46%, list=36%, signal=71%
												1342	GOBP_NEGATIVE_REGULATION_OF_CATABOLIC_PROCESS	341	-0.38	-1.22	0.002	0.363	1	7440	tags=51%, list=39%, signal=82%
												1343	GOBP_POSITIVE_REGULATION_OF_ALPHA_BETA_T_CELL_PROLIFERATION	32	-0.45	-1.22	0.152	0.363	1	5334	tags=47%, list=28%, signal=65%
												1344	GOBP_EMBRYONIC_PATTERN_SPECIFICATION	83	-0.41	-1.22	0.085	0.363	1	6265	tags=45%, list=33%, signal=66%
												1345	GOBP_POSITIVE_REGULATION_OF_CELL_SUBSTRATE_ADHESION	138	-0.4	-1.22	0.034	0.362	1	6599	tags=48%, list=34%, signal=72%
												1346	GOBP_SYNCYTIUM_FORMATION	68	-0.42	-1.22	0.102	0.362	1	5569	tags=41%, list=29%, signal=58%
												1347	GOBP_REGULATION_OF_TRANSPORTER_ACTIVITY	297	-0.38	-1.22	0.015	0.363	1	4518	tags=34%, list=24%, signal=43%
												1348	GOBP_EPITHELIAL_TO_MESENCHYMAL_TRANSITION	165	-0.4	-1.22	0.035	0.363	1	7224	tags=54%, list=38%, signal=86%
												1349	GOBP_CEREBELLAR_CORTEX_DEVELOPMENT	69	-0.41	-1.22	0.095	0.363	1	7215	tags=55%, list=38%, signal=88%
												1350	GOBP_NEGATIVE_REGULATION_OF_WNT_SIGNALING_PATHWAY	168	-0.39	-1.22	0.03	0.363	1	5459	tags=40%, list=28%, signal=55%
												1351	GOBP_PROTEIN_CONTAINING_COMPLEX_LOCALIZATION	241	-0.39	-1.22	0.014	0.362	1	7502	tags=53%, list=39%, signal=86%
												1352	GOBP_NEUROENDOCRINE_CELL_DIFFERENTIATION	16	-0.5	-1.21	0.18	0.364	1	5976	tags=50%, list=31%, signal=73%
												1353	GOBP_CELLULAR_RESPONSE_TO_CHEMICAL_STRESS	298	-0.39	-1.21	0.005	0.364	1	6698	tags=47%, list=35%, signal=71%
												1354	GOBP_TYROSINE_METABOLIC_PROCESS	15	-0.5	-1.21	0.196	0.365	1	758	tags=20%, list=4%, signal=21%
												1355	GOBP_BONE_MATURATION	30	-0.45	-1.21	0.169	0.365	1	2040	tags=23%, list=11%, signal=26%
												1356	GOBP_MESENCHYME_MORPHOGENESIS	59	-0.41	-1.21	0.117	0.364	1	7225	tags=54%, list=38%, signal=87%
												1357	GOBP_REGULATION_OF_NEUROTRANSMITTER_TRANSPORT	123	-0.4	-1.21	0.039	0.364	1	7462	tags=56%, list=39%, signal=91%
												1358	GOBP_REGULATION_OF_NUCLEOTIDE_METABOLIC_PROCESS	53	-0.42	-1.21	0.137	0.364	1	8161	tags=62%, list=43%, signal=108%
												1359	GOBP_GANGLIOSIDE_METABOLIC_PROCESS	27	-0.46	-1.21	0.166	0.365	1	3462	tags=30%, list=18%, signal=36%
												1360	GOBP_REGULATION_OF_MAP_KINASE_ACTIVITY	190	-0.39	-1.21	0.024	0.364	1	7008	tags=51%, list=37%, signal=80%
												1361	GOBP_SISTER_CHROMATID_SEGREGATION	210	-0.39	-1.21	0.011	0.364	1	7825	tags=56%, list=41%, signal=93%
												1362	GOBP_RESPONSE_TO_MOLECULE_OF_BACTERIAL_ORIGIN	322	-0.38	-1.21	0.008	0.364	1	5741	tags=37%, list=30%, signal=52%
												1363	GOBP_PROTEIN_ACYLATION	154	-0.39	-1.21	0.031	0.365	1	8753	tags=60%, list=46%, signal=109%
												1364	GOBP_RESPONSE_TO_NUTRIENT	76	-0.41	-1.21	0.096	0.365	1	6803	tags=51%, list=35%, signal=79%
												1365	GOBP_POSITIVE_REGULATION_OF_GROWTH	309	-0.38	-1.21	0.006	0.365	1	6863	tags=48%, list=36%, signal=73%
												1366	GOBP_NEGATIVE_REGULATION_OF_NERVOUS_SYSTEM_DEVELOPMENT	182	-0.39	-1.21	0.023	0.364	1	7649	tags=57%, list=40%, signal=93%
												1367	GOBP_POSITIVE_REGULATION_OF_LEUKOCYTE_TETHERING_OR_ROLLING	15	-0.51	-1.21	0.178	0.364	1	2216	tags=27%, list=12%, signal=30%
												1368	GOBP_PROTEIN_DEPHOSPHORYLATION	226	-0.39	-1.21	0.021	0.364	1	9485	tags=68%, list=49%, signal=132%
												1369	GOBP_VESICLE_MEDIATED_TRANSPORT_IN_SYNAPSE	266	-0.39	-1.21	0.008	0.365	1	7502	tags=53%, list=39%, signal=86%
												1370	GOBP_REGULATION_OF_DENDRITIC_SPINE_MORPHOGENESIS	57	-0.42	-1.21	0.107	0.364	1	4064	tags=35%, list=21%, signal=44%
												1371	GOBP_ACTIVATION_OF_CYSTEINE_TYPE_ENDOPEPTIDASE_ACTIVITY_INVOLVED_IN_APOPTOTIC_PROCESS	75	-0.41	-1.21	0.095	0.364	1	7674	tags=56%, list=40%, signal=93%
												1372	GOBP_POSITIVE_REGULATION_OF_CELL_SIZE	19	-0.48	-1.21	0.188	0.365	1	8516	tags=79%, list=44%, signal=142%
												1373	GOBP_RECOMBINATIONAL_REPAIR	168	-0.39	-1.21	0.032	0.364	1	7168	tags=48%, list=37%, signal=76%
												1374	GOBP_PEPTIDYL_LYSINE_ACETYLATION	80	-0.41	-1.21	0.086	0.365	1	9564	tags=68%, list=50%, signal=134%
												1375	GOBP_VIRAL_RNA_GENOME_REPLICATION	26	-0.47	-1.21	0.161	0.365	1	3728	tags=42%, list=19%, signal=52%
												1376	GOBP_VASCULAR_ASSOCIATED_SMOOTH_MUSCLE_CELL_DIFFERENTIATION	41	-0.43	-1.21	0.146	0.365	1	6481	tags=56%, list=34%, signal=85%
												1377	GOBP_RESPONSE_TO_EXTRACELLULAR_STIMULUS	434	-0.38	-1.21	0.003	0.365	1	7454	tags=49%, list=39%, signal=79%
												1378	GOBP_CARDIAC_CHAMBER_DEVELOPMENT	197	-0.39	-1.21	0.028	0.364	1	7111	tags=49%, list=37%, signal=77%
												1379	GOBP_NEGATIVE_REGULATION_OF_FIBROBLAST_GROWTH_FACTOR_RECEPTOR_SIGNALING_PATHWAY	19	-0.49	-1.21	0.194	0.364	1	2232	tags=32%, list=12%, signal=36%
												1380	GOBP_POSITIVE_REGULATION_OF_DNA_TEMPLATED_TRANSCRIPTION_INITIATION	71	-0.41	-1.21	0.108	0.365	1	6715	tags=48%, list=35%, signal=73%
												1381	GOBP_METANEPHROS_DEVELOPMENT	91	-0.41	-1.21	0.081	0.365	1	7538	tags=55%, list=39%, signal=90%
												1382	GOBP_AORTIC_VALVE_DEVELOPMENT	34	-0.45	-1.21	0.147	0.367	1	2824	tags=35%, list=15%, signal=41%
												1383	GOBP_MAINTENANCE_OF_SYNAPSE_STRUCTURE	28	-0.46	-1.21	0.17	0.366	1	7809	tags=64%, list=41%, signal=108%
												1384	GOBP_EXTRINSIC_APOPTOTIC_SIGNALING_PATHWAY_VIA_DEATH_DOMAIN_RECEPTORS	80	-0.41	-1.21	0.084	0.366	1	6731	tags=50%, list=35%, signal=77%
												1385	GOBP_CARDIOCYTE_DIFFERENTIATION	189	-0.39	-1.21	0.021	0.367	1	6613	tags=47%, list=34%, signal=71%
												1386	GOBP_RHO_PROTEIN_SIGNAL_TRANSDUCTION	136	-0.4	-1.21	0.042	0.367	1	9040	tags=66%, list=47%, signal=124%
												1387	GOBP_PHOTORECEPTOR_CELL_DEVELOPMENT	64	-0.41	-1.21	0.116	0.368	1	7423	tags=48%, list=39%, signal=79%
												1388	GOBP_NEGATIVE_REGULATION_OF_INSULIN_SECRETION_INVOLVED_IN_CELLULAR_RESPONSE_TO_GLUCOSE_STIMULUS	17	-0.5	-1.21	0.188	0.368	1	7337	tags=65%, list=38%, signal=105%
												1389	GOBP_ORGANIC_ACID_TRANSMEMBRANE_TRANSPORT	142	-0.39	-1.21	0.048	0.368	1	7851	tags=55%, list=41%, signal=92%
												1390	GOBP_S_ADENOSYLMETHIONINE_METABOLIC_PROCESS	16	-0.5	-1.21	0.204	0.368	1	5756	tags=56%, list=30%, signal=80%
												1391	GOBP_REGULATION_OF_CELLULAR_PH	88	-0.41	-1.21	0.074	0.368	1	4916	tags=38%, list=26%, signal=50%
												1392	GOBP_POSITIVE_REGULATION_OF_CYTOKINESIS	43	-0.43	-1.21	0.147	0.368	1	4573	tags=37%, list=24%, signal=49%
												1393	GOBP_EMBRYONIC_HEART_TUBE_DEVELOPMENT	94	-0.41	-1.21	0.067	0.368	1	6862	tags=51%, list=36%, signal=79%
												1394	GOBP_PROTEIN_TARGETING_TO_MEMBRANE	120	-0.4	-1.21	0.048	0.369	1	6982	tags=49%, list=36%, signal=77%
												1395	GOBP_TRANSCRIPTION_INITIATION_AT_RNA_POLYMERASE_II_PROMOTER	96	-0.4	-1.21	0.076	0.369	1	6200	tags=47%, list=32%, signal=69%
												1396	GOBP_PROTEIN_CATABOLIC_PROCESS_IN_THE_VACUOLE	22	-0.47	-1.21	0.205	0.369	1	7399	tags=64%, list=39%, signal=103%
												1397	GOBP_RESPONSE_TO_OXYGEN_RADICAL	24	-0.47	-1.21	0.179	0.369	1	6225	tags=58%, list=32%, signal=86%
												1398	GOBP_MEMBRANE_FUSION	165	-0.39	-1.21	0.04	0.368	1	8649	tags=60%, list=45%, signal=108%
												1399	GOBP_REGULATION_OF_PH	105	-0.4	-1.21	0.068	0.369	1	4916	tags=35%, list=26%, signal=47%
												1400	GOBP_ENDOCARDIAL_CUSHION_FORMATION	31	-0.45	-1.21	0.164	0.368	1	7087	tags=61%, list=37%, signal=97%
												1401	GOBP_MICROTUBULE_DEPOLYMERIZATION	59	-0.42	-1.21	0.113	0.369	1	7651	tags=56%, list=40%, signal=93%
												1402	GOBP_PROTEIN_CONTAINING_COMPLEX_DISASSEMBLY	245	-0.39	-1.21	0.02	0.37	1	7262	tags=50%, list=38%, signal=79%
												1403	GOBP_FATTY_ACID_DERIVATIVE_CATABOLIC_PROCESS	18	-0.49	-1.21	0.187	0.37	1	7755	tags=61%, list=40%, signal=103%
												1404	GOBP_CRANIAL_NERVE_DEVELOPMENT	57	-0.42	-1.21	0.116	0.37	1	7954	tags=56%, list=41%, signal=96%
												1405	GOBP_ESTABLISHMENT_OF_PROTEIN_LOCALIZATION_TO_ORGANELLE	432	-0.38	-1.21	0.003	0.37	1	6816	tags=47%, list=36%, signal=71%
												1406	GOBP_POSITIVE_REGULATION_OF_DENDRITE_DEVELOPMENT	22	-0.47	-1.21	0.173	0.37	1	6990	tags=59%, list=36%, signal=93%
												1407	GOBP_AMEBOIDAL_TYPE_CELL_MIGRATION	459	-0.38	-1.21	0.003	0.371	1	7242	tags=51%, list=38%, signal=80%
												1408	GOBP_TISSUE_REGENERATION	70	-0.41	-1.21	0.106	0.371	1	6784	tags=49%, list=35%, signal=75%
												1409	GOBP_CARDIAC_VENTRICLE_DEVELOPMENT	150	-0.39	-1.21	0.046	0.372	1	6831	tags=48%, list=36%, signal=74%
												1410	GOBP_PROTEIN_TRANSMEMBRANE_TRANSPORT	55	-0.42	-1.21	0.119	0.372	1	6356	tags=47%, list=33%, signal=71%
												1411	GOBP_POSITIVE_REGULATION_OF_SMALL_GTPASE_MEDIATED_SIGNAL_TRANSDUCTION	75	-0.41	-1.21	0.101	0.373	1	7242	tags=56%, list=38%, signal=90%
												1412	GOBP_REGULATION_OF_OSTEOBLAST_DIFFERENTIATION	149	-0.39	-1.21	0.042	0.373	1	7189	tags=50%, list=37%, signal=79%
												1413	GOBP_REGULATION_OF_SMOOTHENED_SIGNALING_PATHWAY	99	-0.4	-1.21	0.073	0.374	1	8968	tags=67%, list=47%, signal=125%
												1414	GOBP_ADENYLATE_CYCLASE_ACTIVATING_G_PROTEIN_COUPLED_RECEPTOR_SIGNALING_PATHWAY	158	-0.39	-1.21	0.037	0.373	1	4623	tags=35%, list=24%, signal=46%
												1415	GOBP_POSITIVE_REGULATION_OF_DENDRITIC_SPINE_DEVELOPMENT	64	-0.41	-1.21	0.109	0.373	1	7712	tags=53%, list=40%, signal=89%
												1416	GOBP_APPENDAGE_MORPHOGENESIS	175	-0.39	-1.21	0.041	0.373	1	6022	tags=43%, list=31%, signal=63%
												1417	GOBP_TRNA_WOBBLE_BASE_MODIFICATION	19	-0.48	-1.21	0.185	0.374	1	7271	tags=63%, list=38%, signal=102%
												1418	GOBP_SEX_DIFFERENTIATION	296	-0.38	-1.21	0.01	0.375	1	6990	tags=45%, list=36%, signal=70%
												1419	GOBP_ENDOTHELIAL_CELL_CHEMOTAXIS	31	-0.44	-1.21	0.176	0.375	1	3887	tags=35%, list=20%, signal=44%
												1420	GOBP_NEGATIVE_REGULATION_OF_CELLULAR_RESPONSE_TO_GROWTH_FACTOR_STIMULUS	105	-0.4	-1.21	0.072	0.375	1	6546	tags=49%, list=34%, signal=73%
												1421	GOBP_OSTEOBLAST_DIFFERENTIATION	213	-0.39	-1.21	0.029	0.375	1	7189	tags=49%, list=37%, signal=77%
												1422	GOBP_REGULATION_OF_PROTEIN_CONTAINING_COMPLEX_ASSEMBLY	420	-0.38	-1.21	0.005	0.375	1	7478	tags=47%, list=39%, signal=75%
												1423	GOBP_RUFFLE_ASSEMBLY	43	-0.43	-1.21	0.161	0.375	1	4762	tags=37%, list=25%, signal=49%
												1424	GOBP_VENTRICULAR_CARDIAC_MUSCLE_TISSUE_DEVELOPMENT	68	-0.41	-1.21	0.108	0.374	1	6425	tags=47%, list=34%, signal=71%
												1425	GOBP_NEGATIVE_REGULATION_OF_OSTEOBLAST_DIFFERENTIATION	61	-0.42	-1.21	0.114	0.375	1	6122	tags=44%, list=32%, signal=65%
												1426	GOBP_POSITIVE_REGULATION_OF_TRANSCRIPTION_REGULATORY_REGION_DNA_BINDING	25	-0.46	-1.21	0.171	0.375	1	7523	tags=60%, list=39%, signal=99%
												1427	GOBP_MUSCLE_CELL_CELLULAR_HOMEOSTASIS	26	-0.46	-1.21	0.175	0.375	1	6425	tags=62%, list=34%, signal=92%
												1428	GOBP_CHONDROCYTE_DEVELOPMENT	35	-0.44	-1.21	0.165	0.375	1	4690	tags=40%, list=24%, signal=53%
												1429	GOBP_POSITIVE_REGULATION_OF_NUCLEAR_TRANSCRIBED_MRNA_CATABOLIC_PROCESS_DEADENYLATION_DEPENDENT_DECAY	15	-0.5	-1.21	0.197	0.374	1	5506	tags=60%, list=29%, signal=84%
												1430	GOBP_REGULATION_OF_POTASSIUM_ION_TRANSMEMBRANE_TRANSPORT	94	-0.4	-1.21	0.09	0.374	1	4123	tags=33%, list=21%, signal=42%
												1431	GOBP_NOREPINEPHRINE_METABOLIC_PROCESS	19	-0.49	-1.2	0.197	0.374	1	3558	tags=37%, list=19%, signal=45%
												1432	GOBP_REGULATION_OF_MICROTUBULE_POLYMERIZATION_OR_DEPOLYMERIZATION	92	-0.41	-1.2	0.092	0.375	1	6617	tags=48%, list=35%, signal=73%
												1433	GOBP_EYE_PHOTORECEPTOR_CELL_DIFFERENTIATION	61	-0.42	-1.2	0.091	0.374	1	6145	tags=44%, list=32%, signal=65%
												1434	GOBP_REGULATION_OF_PROTEIN_SERINE_THREONINE_KINASE_ACTIVITY	328	-0.38	-1.2	0.012	0.375	1	7024	tags=49%, list=37%, signal=76%
												1435	GOBP_REGULATION_OF_APOPTOTIC_SIGNALING_PATHWAY	420	-0.38	-1.2	0.003	0.375	1	6685	tags=45%, list=35%, signal=68%
												1436	GOBP_MALE_SEX_DIFFERENTIATION	163	-0.39	-1.2	0.048	0.376	1	6318	tags=42%, list=33%, signal=62%
												1437	GOBP_NEGATIVE_REGULATION_OF_CANONICAL_WNT_SIGNALING_PATHWAY	133	-0.4	-1.2	0.052	0.375	1	5459	tags=40%, list=28%, signal=55%
												1438	GOBP_STARTLE_RESPONSE	40	-0.44	-1.2	0.145	0.375	1	4064	tags=38%, list=21%, signal=47%
												1439	GOBP_POSITIVE_REGULATION_OF_MYELINATION	25	-0.46	-1.2	0.179	0.375	1	5469	tags=44%, list=29%, signal=61%
												1440	GOBP_P_BODY_ASSEMBLY	19	-0.48	-1.2	0.211	0.375	1	8823	tags=74%, list=46%, signal=136%
												1441	GOBP_NEGATIVE_REGULATION_OF_VASCULAR_ASSOCIATED_SMOOTH_MUSCLE_CELL_PROLIFERATION	33	-0.45	-1.2	0.17	0.375	1	4093	tags=33%, list=21%, signal=42%
												1442	GOBP_NEGATIVE_REGULATION_OF_SUPRAMOLECULAR_FIBER_ORGANIZATION	176	-0.39	-1.2	0.033	0.375	1	7135	tags=49%, list=37%, signal=77%
												1443	GOBP_RESPONSE_TO_AXON_INJURY	75	-0.4	-1.2	0.12	0.375	1	6999	tags=57%, list=36%, signal=90%
												1444	GOBP_RECEPTOR_METABOLIC_PROCESS	83	-0.4	-1.2	0.11	0.375	1	6425	tags=51%, list=34%, signal=76%
												1445	GOBP_POSITIVE_REGULATION_OF_SMOOTHENED_SIGNALING_PATHWAY	44	-0.43	-1.2	0.147	0.375	1	8158	tags=59%, list=43%, signal=103%
												1446	GOBP_POSITIVE_REGULATION_OF_MRNA_METABOLIC_PROCESS	130	-0.39	-1.2	0.067	0.375	1	7075	tags=49%, list=37%, signal=77%
												1447	GOBP_INFLAMMATORY_RESPONSE_TO_WOUNDING	33	-0.44	-1.2	0.179	0.374	1	5197	tags=39%, list=27%, signal=54%
												1448	GOBP_POLYOL_METABOLIC_PROCESS	105	-0.4	-1.2	0.085	0.374	1	5903	tags=42%, list=31%, signal=60%
												1449	GOBP_CELLULAR_COMPONENT_MAINTENANCE	84	-0.41	-1.2	0.106	0.374	1	4514	tags=36%, list=24%, signal=47%
												1450	GOBP_POSITIVE_REGULATION_OF_PROTEIN_SERINE_THREONINE_KINASE_ACTIVITY	195	-0.39	-1.2	0.029	0.374	1	7077	tags=51%, list=37%, signal=80%
												1451	GOBP_REGULATION_OF_KERATINOCYTE_PROLIFERATION	49	-0.43	-1.2	0.153	0.374	1	6810	tags=57%, list=36%, signal=88%
												1452	GOBP_PHOSPHATIDYLINOSITOL_BIOSYNTHETIC_PROCESS	101	-0.4	-1.2	0.074	0.374	1	7553	tags=55%, list=39%, signal=91%
												1453	GOBP_GOLGI_TO_PLASMA_MEMBRANE_PROTEIN_TRANSPORT	37	-0.43	-1.2	0.19	0.374	1	5389	tags=46%, list=28%, signal=64%
												1454	GOBP_POSITIVE_CHEMOTAXIS	44	-0.43	-1.2	0.156	0.374	1	6265	tags=43%, list=33%, signal=64%
												1455	GOBP_SPHINGOLIPID_METABOLIC_PROCESS	141	-0.39	-1.2	0.046	0.374	1	6878	tags=48%, list=36%, signal=75%
												1456	GOBP_MYELOID_DENDRITIC_CELL_DIFFERENTIATION	22	-0.46	-1.2	0.194	0.373	1	6605	tags=50%, list=34%, signal=76%
												1457	GOBP_NONRIBOSOMAL_PEPTIDE_BIOSYNTHETIC_PROCESS	16	-0.5	-1.2	0.2	0.374	1	3143	tags=38%, list=16%, signal=45%
												1458	GOBP_POSITIVE_REGULATION_OF_MUSCLE_HYPERTROPHY	41	-0.43	-1.2	0.165	0.374	1	7170	tags=59%, list=37%, signal=93%
												1459	GOBP_POSITIVE_REGULATION_OF_BLOOD_CIRCULATION	45	-0.42	-1.2	0.155	0.374	1	4748	tags=40%, list=25%, signal=53%
												1460	GOBP_POSITIVE_REGULATION_OF_NEURON_PROJECTION_REGENERATION	15	-0.5	-1.2	0.194	0.373	1	5802	tags=60%, list=30%, signal=86%
												1461	GOBP_RESPONSE_TO_REACTIVE_OXYGEN_SPECIES	194	-0.39	-1.2	0.033	0.373	1	6798	tags=46%, list=35%, signal=71%
												1462	GOBP_VITAMIN_BIOSYNTHETIC_PROCESS	25	-0.45	-1.2	0.195	0.373	1	6012	tags=48%, list=31%, signal=70%
												1463	GOBP_NEGATIVE_REGULATION_OF_TRANSFORMING_GROWTH_FACTOR_BETA_RECEPTOR_SIGNALING_PATHWAY	92	-0.4	-1.2	0.078	0.373	1	6765	tags=52%, list=35%, signal=80%
												1464	GOBP_CERAMIDE_METABOLIC_PROCESS	98	-0.4	-1.2	0.072	0.373	1	6774	tags=47%, list=35%, signal=72%
												1465	GOBP_REGULATION_OF_CHROMATIN_ORGANIZATION	51	-0.42	-1.2	0.143	0.373	1	8753	tags=67%, list=46%, signal=122%
												1466	GOBP_DRINKING_BEHAVIOR	17	-0.49	-1.2	0.213	0.373	1	2431	tags=24%, list=13%, signal=27%
												1467	GOBP_REGULATION_OF_ESTABLISHMENT_OF_CELL_POLARITY	22	-0.47	-1.2	0.186	0.372	1	7167	tags=68%, list=37%, signal=109%
												1468	GOBP_REGULATION_OF_SMALL_GTPASE_MEDIATED_SIGNAL_TRANSDUCTION	224	-0.39	-1.2	0.024	0.373	1	7488	tags=54%, list=39%, signal=87%
												1469	GOBP_POSITIVE_REGULATION_OF_PHOSPHATASE_ACTIVITY	31	-0.45	-1.2	0.167	0.372	1	9441	tags=71%, list=49%, signal=140%
												1470	GOBP_MITOTIC_SPINDLE_ASSEMBLY	66	-0.41	-1.2	0.116	0.372	1	7518	tags=59%, list=39%, signal=97%
												1471	GOBP_CELLULAR_RESPONSE_TO_STEROID_HORMONE_STIMULUS	175	-0.39	-1.2	0.031	0.373	1	7315	tags=50%, list=38%, signal=80%
												1472	GOBP_HEPARAN_SULFATE_PROTEOGLYCAN_BIOSYNTHETIC_PROCESS	31	-0.44	-1.2	0.184	0.372	1	5003	tags=42%, list=26%, signal=57%
												1473	GOBP_OOCYTE_MATURATION	37	-0.43	-1.2	0.17	0.372	1	7168	tags=54%, list=37%, signal=86%
												1474	GOBP_PROTEIN_POLYMERIZATION	273	-0.38	-1.2	0.017	0.373	1	7303	tags=47%, list=38%, signal=74%
												1475	GOBP_REGULATION_OF_POST_TRANSLATIONAL_PROTEIN_MODIFICATION	282	-0.38	-1.2	0.01	0.373	1	7782	tags=54%, list=41%, signal=90%
												1476	GOBP_NEGATIVE_REGULATION_OF_TORC1_SIGNALING	38	-0.43	-1.2	0.158	0.373	1	7127	tags=58%, list=37%, signal=92%
												1477	GOBP_TRICARBOXYLIC_ACID_CYCLE	32	-0.44	-1.2	0.197	0.374	1	8135	tags=63%, list=42%, signal=108%
												1478	GOBP_MULTICELLULAR_ORGANISMAL_LEVEL_IRON_ION_HOMEOSTASIS	30	-0.44	-1.2	0.18	0.374	1	6844	tags=53%, list=36%, signal=83%
												1479	GOBP_POST_EMBRYONIC_ANIMAL_MORPHOGENESIS	20	-0.47	-1.2	0.197	0.374	1	3048	tags=35%, list=16%, signal=42%
												1480	GOBP_LONG_TERM_SYNAPTIC_DEPRESSION	38	-0.44	-1.2	0.158	0.374	1	8370	tags=68%, list=44%, signal=121%
												1481	GOBP_CARDIAC_MUSCLE_CONTRACTION	129	-0.4	-1.2	0.051	0.374	1	6488	tags=47%, list=34%, signal=70%
												1482	GOBP_CELL_VOLUME_HOMEOSTASIS	39	-0.43	-1.2	0.161	0.374	1	5989	tags=41%, list=31%, signal=60%
												1483	GOBP_CARDIAC_CELL_DEVELOPMENT	114	-0.4	-1.2	0.068	0.374	1	6613	tags=47%, list=34%, signal=72%
												1484	GOBP_RESPONSE_TO_OSMOTIC_STRESS	83	-0.4	-1.2	0.109	0.375	1	7157	tags=46%, list=37%, signal=73%
												1485	GOBP_PLACENTA_DEVELOPMENT	176	-0.39	-1.2	0.039	0.375	1	7459	tags=49%, list=39%, signal=80%
												1486	GOBP_PLASMA_MEMBRANE_ORGANIZATION	161	-0.39	-1.2	0.048	0.374	1	6217	tags=42%, list=32%, signal=62%
												1487	GOBP_FATTY_ACID_DERIVATIVE_BIOSYNTHETIC_PROCESS	19	-0.47	-1.2	0.202	0.374	1	9667	tags=84%, list=50%, signal=170%
												1488	GOBP_POSITIVE_REGULATION_OF_VESICLE_FUSION	19	-0.48	-1.2	0.191	0.375	1	7600	tags=63%, list=40%, signal=105%
												1489	GOBP_GLUTAMINE_METABOLIC_PROCESS	23	-0.46	-1.2	0.188	0.375	1	6264	tags=52%, list=33%, signal=77%
												1490	GOBP_NEGATIVE_REGULATION_OF_DNA_RECOMBINATION	49	-0.42	-1.2	0.158	0.375	1	9034	tags=63%, list=47%, signal=119%
												1491	GOBP_NEGATIVE_REGULATION_OF_CARTILAGE_DEVELOPMENT	33	-0.44	-1.2	0.173	0.375	1	3921	tags=36%, list=20%, signal=46%
												1492	GOBP_POSITIVE_REGULATION_OF_GTPASE_ACTIVITY	249	-0.38	-1.2	0.018	0.375	1	7488	tags=49%, list=39%, signal=80%
												1493	GOBP_REGULATION_OF_CELL_GROWTH	436	-0.38	-1.2	0.006	0.375	1	7782	tags=52%, list=41%, signal=86%
												1494	GOBP_POSITIVE_REGULATION_OF_PROTEOLYSIS_INVOLVED_IN_PROTEIN_CATABOLIC_PROCESS	126	-0.39	-1.2	0.055	0.375	1	7170	tags=51%, list=37%, signal=81%
												1495	GOBP_REGULATION_OF_NATURAL_KILLER_CELL_MEDIATED_IMMUNITY	58	-0.41	-1.2	0.137	0.376	1	7601	tags=50%, list=40%, signal=83%
												1496	GOBP_POSITIVE_REGULATION_OF_T_CELL_RECEPTOR_SIGNALING_PATHWAY	18	-0.48	-1.2	0.203	0.376	1	6909	tags=56%, list=36%, signal=87%
												1497	GOBP_POTASSIUM_ION_EXPORT_ACROSS_PLASMA_MEMBRANE	19	-0.48	-1.2	0.188	0.376	1	3423	tags=32%, list=18%, signal=38%
												1498	GOBP_POSITIVE_REGULATION_OF_INTRACELLULAR_TRANSPORT	188	-0.39	-1.2	0.029	0.376	1	7640	tags=53%, list=40%, signal=87%
												1499	GOBP_DIET_INDUCED_THERMOGENESIS	16	-0.49	-1.2	0.217	0.376	1	6092	tags=63%, list=32%, signal=92%
												1500	GOBP_REGULATION_OF_ACTIN_FILAMENT_BUNDLE_ASSEMBLY	113	-0.4	-1.2	0.079	0.376	1	5577	tags=42%, list=29%, signal=60%
												1501	GOBP_NEGATIVE_REGULATION_OF_VIRAL_GENOME_REPLICATION	50	-0.42	-1.2	0.147	0.376	1	3224	tags=28%, list=17%, signal=34%
												1502	GOBP_GASTRULATION	183	-0.39	-1.2	0.039	0.376	1	5613	tags=41%, list=29%, signal=57%
												1503	GOBP_NEGATIVE_REGULATION_OF_ORGANELLE_ORGANIZATION	378	-0.38	-1.2	0.01	0.376	1	7735	tags=52%, list=40%, signal=86%
												1504	GOBP_REGULATION_OF_LIPOPOLYSACCHARIDE_MEDIATED_SIGNALING_PATHWAY	24	-0.46	-1.2	0.188	0.376	1	7082	tags=54%, list=37%, signal=86%
												1505	GOBP_FILOPODIUM_ASSEMBLY	74	-0.41	-1.2	0.113	0.376	1	5126	tags=35%, list=27%, signal=48%
												1506	GOBP_WATER_SOLUBLE_VITAMIN_METABOLIC_PROCESS	47	-0.42	-1.2	0.152	0.376	1	7665	tags=53%, list=40%, signal=88%
												1507	GOBP_POSITIVE_REGULATION_OF_CELL_GROWTH	195	-0.39	-1.2	0.036	0.377	1	6183	tags=45%, list=32%, signal=66%
												1508	GOBP_REGULATION_OF_CELLULAR_COMPONENT_SIZE	401	-0.38	-1.2	0.011	0.377	1	7022	tags=47%, list=37%, signal=72%
												1509	GOBP_NEGATIVE_REGULATION_OF_PROTEIN_SERINE_THREONINE_KINASE_ACTIVITY	104	-0.4	-1.2	0.087	0.378	1	7008	tags=49%, list=37%, signal=77%
												1510	GOBP_POSITIVE_REGULATION_OF_TRANSMEMBRANE_RECEPTOR_PROTEIN_SERINE_THREONINE_KINASE_SIGNALING_PATHWAY	101	-0.4	-1.2	0.091	0.379	1	2846	tags=26%, list=15%, signal=30%
												1511	GOBP_LUNG_MORPHOGENESIS	72	-0.41	-1.2	0.118	0.379	1	7197	tags=50%, list=38%, signal=80%
												1512	GOBP_PHYSIOLOGICAL_CARDIAC_MUSCLE_HYPERTROPHY	43	-0.43	-1.2	0.159	0.379	1	6613	tags=51%, list=34%, signal=78%
												1513	GOBP_REGULATION_OF_POTASSIUM_ION_TRANSPORT	115	-0.4	-1.2	0.06	0.379	1	5615	tags=41%, list=29%, signal=57%
												1514	GOBP_ORGANELLE_FUSION	164	-0.39	-1.2	0.054	0.379	1	7722	tags=55%, list=40%, signal=91%
												1515	GOBP_POSITIVE_REGULATION_OF_VASOCONSTRICTION	53	-0.42	-1.2	0.137	0.381	1	6426	tags=51%, list=34%, signal=76%
												1516	GOBP_CYTOKINESIS	176	-0.39	-1.2	0.045	0.381	1	7534	tags=51%, list=39%, signal=83%
												1517	GOBP_RESPONSE_TO_BMP	175	-0.39	-1.2	0.042	0.381	1	4675	tags=34%, list=24%, signal=45%
												1518	GOBP_POSITIVE_REGULATION_OF_CATECHOLAMINE_SECRETION	19	-0.48	-1.2	0.203	0.381	1	6164	tags=53%, list=32%, signal=77%
												1519	GOBP_HEPATOCYTE_APOPTOTIC_PROCESS	24	-0.45	-1.2	0.218	0.382	1	9458	tags=79%, list=49%, signal=156%
												1520	GOBP_ODONTOGENESIS_OF_DENTIN_CONTAINING_TOOTH	94	-0.4	-1.19	0.102	0.382	1	6698	tags=48%, list=35%, signal=73%
												1521	GOBP_PROTEIN_LOCALIZATION_TO_NUCLEUS	325	-0.38	-1.19	0.017	0.382	1	7762	tags=52%, list=40%, signal=85%
												1522	GOBP_BLASTODERM_SEGMENTATION	30	-0.44	-1.19	0.197	0.382	1	5676	tags=43%, list=30%, signal=61%
												1523	GOBP_NEGATIVE_REGULATION_OF_AMYLOID_PRECURSOR_PROTEIN_CATABOLIC_PROCESS	20	-0.47	-1.19	0.22	0.383	1	9167	tags=70%, list=48%, signal=134%
												1524	GOBP_NEGATIVE_REGULATION_OF_POST_TRANSLATIONAL_PROTEIN_MODIFICATION	96	-0.4	-1.19	0.093	0.383	1	4679	tags=34%, list=24%, signal=45%
												1525	GOBP_COCHLEA_MORPHOGENESIS	28	-0.45	-1.19	0.193	0.383	1	3921	tags=32%, list=20%, signal=40%
												1526	GOBP_ENDOPLASMIC_RETICULUM_ORGANIZATION	93	-0.4	-1.19	0.097	0.383	1	7546	tags=54%, list=39%, signal=88%
												1527	GOBP_POSTREPLICATION_REPAIR	27	-0.45	-1.19	0.187	0.383	1	4670	tags=37%, list=24%, signal=49%
												1528	GOBP_FACE_DEVELOPMENT	62	-0.41	-1.19	0.132	0.383	1	7649	tags=58%, list=40%, signal=96%
												1529	GOBP_REGULATION_OF_CELLULAR_RESPONSE_TO_GROWTH_FACTOR_STIMULUS	318	-0.38	-1.19	0.012	0.384	1	6909	tags=47%, list=36%, signal=72%
												1530	GOBP_PROTON_TRANSPORTING_TWO_SECTOR_ATPASE_COMPLEX_ASSEMBLY	16	-0.5	-1.19	0.209	0.384	1	6510	tags=63%, list=34%, signal=95%
												1531	GOBP_LENS_MORPHOGENESIS_IN_CAMERA_TYPE_EYE	28	-0.44	-1.19	0.197	0.384	1	6045	tags=46%, list=32%, signal=68%
												1532	GOBP_REGULATION_OF_VIRAL_LIFE_CYCLE	136	-0.39	-1.19	0.06	0.384	1	7555	tags=49%, list=39%, signal=81%
												1533	GOBP_INTERNEURON_MIGRATION	16	-0.49	-1.19	0.223	0.384	1	1309	tags=31%, list=7%, signal=34%
												1534	GOBP_CELLULAR_RESPONSE_TO_REACTIVE_OXYGEN_SPECIES	144	-0.39	-1.19	0.062	0.385	1	6798	tags=49%, list=35%, signal=75%
												1535	GOBP_POSITIVE_REGULATION_OF_PROTEASOMAL_UBIQUITIN_DEPENDENT_PROTEIN_CATABOLIC_PROCESS	87	-0.4	-1.19	0.114	0.385	1	6649	tags=49%, list=35%, signal=75%
												1536	GOBP_HORMONE_MEDIATED_SIGNALING_PATHWAY	164	-0.39	-1.19	0.05	0.385	1	7315	tags=52%, list=38%, signal=84%
												1537	GOBP_ONE_CARBON_METABOLIC_PROCESS	39	-0.42	-1.19	0.187	0.386	1	7779	tags=51%, list=41%, signal=86%
												1538	GOBP_REGULATION_OF_NATURAL_KILLER_CELL_PROLIFERATION	17	-0.48	-1.19	0.218	0.386	1	5334	tags=41%, list=28%, signal=57%
												1539	GOBP_BIOLOGICAL_PROCESS_INVOLVED_IN_INTERACTION_WITH_HOST	142	-0.39	-1.19	0.064	0.386	1	8239	tags=54%, list=43%, signal=94%
												1540	GOBP_TOLL_LIKE_RECEPTOR_9_SIGNALING_PATHWAY	16	-0.49	-1.19	0.217	0.386	1	4408	tags=44%, list=23%, signal=57%
												1541	GOBP_POSITIVE_REGULATION_OF_CATION_CHANNEL_ACTIVITY	68	-0.41	-1.19	0.107	0.386	1	4194	tags=32%, list=22%, signal=41%
												1542	GOBP_CYTOSKELETON_DEPENDENT_CYTOKINESIS	107	-0.4	-1.19	0.084	0.386	1	7526	tags=52%, list=39%, signal=86%
												1543	GOBP_CELLULAR_RESPONSE_TO_ALCOHOL	122	-0.39	-1.19	0.071	0.386	1	5469	tags=31%, list=29%, signal=43%
												1544	GOBP_MEMBRANE_LIPID_CATABOLIC_PROCESS	36	-0.43	-1.19	0.169	0.386	1	7113	tags=56%, list=37%, signal=88%
												1545	GOBP_POSITIVE_REGULATION_OF_ADAPTIVE_IMMUNE_RESPONSE	132	-0.39	-1.19	0.055	0.387	1	6926	tags=47%, list=36%, signal=73%
												1546	GOBP_ANATOMICAL_STRUCTURE_REGRESSION	19	-0.47	-1.19	0.207	0.387	1	6101	tags=47%, list=32%, signal=69%
												1547	GOBP_REGULATION_OF_RESPONSE_TO_WOUNDING	169	-0.39	-1.19	0.04	0.389	1	6862	tags=49%, list=36%, signal=75%
												1548	GOBP_REGULATION_OF_MACROPHAGE_MIGRATION	48	-0.42	-1.19	0.149	0.389	1	6791	tags=50%, list=35%, signal=77%
												1549	GOBP_CYCLIC_NUCLEOTIDE_MEDIATED_SIGNALING	98	-0.39	-1.19	0.103	0.389	1	5669	tags=42%, list=30%, signal=59%
												1550	GOBP_REGULATION_OF_BIOMINERAL_TISSUE_DEVELOPMENT	103	-0.39	-1.19	0.107	0.39	1	6870	tags=51%, list=36%, signal=80%
												1551	GOBP_MODULATION_OF_EXCITATORY_POSTSYNAPTIC_POTENTIAL	62	-0.4	-1.19	0.147	0.39	1	6791	tags=50%, list=35%, signal=77%
												1552	GOBP_PROTEIN_FOLDING	163	-0.39	-1.19	0.057	0.39	1	7815	tags=52%, list=41%, signal=86%
												1553	GOBP_REGULATION_OF_ENDOCRINE_PROCESS	55	-0.42	-1.19	0.142	0.389	1	1764	tags=22%, list=9%, signal=24%
												1554	GOBP_NEGATIVE_REGULATION_OF_SYSTEMIC_ARTERIAL_BLOOD_PRESSURE	31	-0.44	-1.19	0.201	0.389	1	7423	tags=68%, list=39%, signal=110%
												1555	GOBP_NEGATIVE_REGULATION_OF_SYNAPSE_ORGANIZATION	18	-0.48	-1.19	0.222	0.39	1	7170	tags=61%, list=37%, signal=98%
												1556	GOBP_MYELOID_LEUKOCYTE_DIFFERENTIATION	254	-0.38	-1.19	0.02	0.39	1	6605	tags=46%, list=34%, signal=69%
												1557	GOBP_TRANSCRIPTION_PREINITIATION_COMPLEX_ASSEMBLY	63	-0.41	-1.19	0.138	0.389	1	7793	tags=56%, list=41%, signal=93%
												1558	GOBP_DNA_TEMPLATED_DNA_REPLICATION	146	-0.39	-1.19	0.058	0.389	1	5243	tags=38%, list=27%, signal=52%
												1559	GOBP_CHAPERONE_COFACTOR_DEPENDENT_PROTEIN_REFOLDING	29	-0.45	-1.19	0.195	0.389	1	5236	tags=45%, list=27%, signal=62%
												1560	GOBP_NUCLEOBASE_BIOSYNTHETIC_PROCESS	17	-0.48	-1.19	0.224	0.389	1	5713	tags=53%, list=30%, signal=75%
												1561	GOBP_REGULATION_OF_ACTOMYOSIN_STRUCTURE_ORGANIZATION	112	-0.39	-1.19	0.094	0.39	1	5414	tags=42%, list=28%, signal=58%
												1562	GOBP_NUCLEAR_TRANSPORT	339	-0.38	-1.19	0.011	0.391	1	7762	tags=54%, list=40%, signal=89%
												1563	GOBP_POSITIVE_REGULATION_OF_PROTEIN_DEPOLYMERIZATION	18	-0.48	-1.19	0.214	0.391	1	5071	tags=50%, list=26%, signal=68%
												1564	GOBP_LENS_DEVELOPMENT_IN_CAMERA_TYPE_EYE	89	-0.4	-1.19	0.114	0.391	1	3383	tags=29%, list=18%, signal=35%
												1565	GOBP_LIGAND_GATED_ION_CHANNEL_SIGNALING_PATHWAY	32	-0.44	-1.19	0.193	0.392	1	4194	tags=38%, list=22%, signal=48%
												1566	GOBP_PROTEIN_TARGETING	290	-0.38	-1.19	0.021	0.393	1	7600	tags=54%, list=40%, signal=88%
												1567	GOBP_POSITIVE_REGULATION_OF_MONOCYTE_CHEMOTAXIS	25	-0.45	-1.19	0.209	0.393	1	3474	tags=28%, list=18%, signal=34%
												1568	GOBP_NEGATIVE_REGULATION_OF_FATTY_ACID_METABOLIC_PROCESS	38	-0.43	-1.19	0.203	0.393	1	2800	tags=26%, list=15%, signal=31%
												1569	GOBP_RESPONSE_TO_IRON_ION	21	-0.47	-1.19	0.216	0.393	1	6808	tags=62%, list=35%, signal=96%
												1570	GOBP_T_CELL_MEDIATED_IMMUNITY	129	-0.39	-1.19	0.075	0.393	1	7342	tags=51%, list=38%, signal=82%
												1571	GOBP_REGULATION_OF_SPROUTING_ANGIOGENESIS	42	-0.43	-1.19	0.161	0.393	1	8495	tags=67%, list=44%, signal=119%
												1572	GOBP_CELLULAR_COMPONENT_DISASSEMBLY	457	-0.37	-1.19	0.002	0.394	1	6634	tags=45%, list=35%, signal=67%
												1573	GOBP_LIPOPOLYSACCHARIDE_MEDIATED_SIGNALING_PATHWAY	52	-0.42	-1.19	0.144	0.394	1	7596	tags=54%, list=40%, signal=89%
												1574	GOBP_CELL_DIFFERENTIATION_INVOLVED_IN_EMBRYONIC_PLACENTA_DEVELOPMENT	31	-0.44	-1.19	0.191	0.394	1	3222	tags=29%, list=17%, signal=35%
												1575	GOBP_REGULATION_OF_PROTEIN_POLYUBIQUITINATION	29	-0.44	-1.19	0.195	0.394	1	6886	tags=55%, list=36%, signal=86%
												1576	GOBP_REGULATION_OF_AMYLOID_BETA_CLEARANCE	18	-0.47	-1.19	0.226	0.394	1	5566	tags=50%, list=29%, signal=70%
												1577	GOBP_DENTATE_GYRUS_DEVELOPMENT	25	-0.46	-1.19	0.212	0.394	1	7480	tags=52%, list=39%, signal=85%
												1578	GOBP_VENTRICULAR_CARDIAC_MUSCLE_CELL_DIFFERENTIATION	18	-0.47	-1.19	0.22	0.394	1	2934	tags=33%, list=15%, signal=39%
												1579	GOBP_AMINO_ACID_ACTIVATION	44	-0.42	-1.19	0.164	0.393	1	7529	tags=57%, list=39%, signal=93%
												1580	GOBP_CELLULAR_RESPONSE_TO_OXIDATIVE_STRESS	238	-0.38	-1.19	0.034	0.394	1	6698	tags=48%, list=35%, signal=73%
												1581	GOBP_CELLULAR_RESPONSE_TO_ACID_CHEMICAL	118	-0.39	-1.19	0.084	0.394	1	7280	tags=37%, list=38%, signal=60%
												1582	GOBP_POSITIVE_REGULATION_OF_POST_TRANSLATIONAL_PROTEIN_MODIFICATION	168	-0.38	-1.19	0.059	0.394	1	7211	tags=54%, list=38%, signal=86%
												1583	GOBP_ANOIKIS	31	-0.44	-1.19	0.201	0.395	1	7721	tags=58%, list=40%, signal=97%
												1584	GOBP_POSITIVE_REGULATION_OF_CALCIUM_ION_TRANSMEMBRANE_TRANSPORTER_ACTIVITY	40	-0.42	-1.19	0.177	0.396	1	3557	tags=33%, list=19%, signal=40%
												1585	GOBP_POSITIVE_REGULATION_OF_TRANSFERASE_ACTIVITY	484	-0.37	-1.19	0.004	0.396	1	7847	tags=53%, list=41%, signal=88%
												1586	GOBP_POSITIVE_REGULATION_OF_MULTICELLULAR_ORGANISM_GROWTH	42	-0.42	-1.19	0.176	0.396	1	7798	tags=67%, list=41%, signal=112%
												1587	GOBP_AMP_METABOLIC_PROCESS	29	-0.44	-1.19	0.195	0.396	1	6980	tags=48%, list=36%, signal=76%
												1588	GOBP_REGULATION_OF_RESPONSE_TO_OSMOTIC_STRESS	17	-0.48	-1.19	0.236	0.396	1	7067	tags=53%, list=37%, signal=84%
												1589	GOBP_REGULATION_OF_RNA_STABILITY	174	-0.38	-1.18	0.05	0.397	1	7173	tags=49%, list=37%, signal=77%
												1590	GOBP_REGULATION_OF_ACTIN_FILAMENT_BASED_PROCESS	391	-0.37	-1.18	0.01	0.397	1	7488	tags=50%, list=39%, signal=81%
												1591	GOBP_NEGATIVE_REGULATION_OF_CHROMOSOME_ORGANIZATION	94	-0.39	-1.18	0.103	0.398	1	6146	tags=45%, list=32%, signal=65%
												1592	GOBP_ADULT_BEHAVIOR	188	-0.38	-1.18	0.055	0.398	1	4936	tags=33%, list=26%, signal=44%
												1593	GOBP_EPITHELIAL_CELL_MATURATION	27	-0.45	-1.18	0.218	0.398	1	6425	tags=48%, list=34%, signal=72%
												1594	GOBP_PHENOL_CONTAINING_COMPOUND_BIOSYNTHETIC_PROCESS	54	-0.41	-1.18	0.173	0.398	1	3558	tags=30%, list=19%, signal=36%
												1595	GOBP_POSITIVE_REGULATION_OF_SYNAPTIC_TRANSMISSION_GABAERGIC	20	-0.47	-1.18	0.224	0.398	1	8852	tags=75%, list=46%, signal=139%
												1596	GOBP_3_UTR_MEDIATED_MRNA_STABILIZATION	21	-0.46	-1.18	0.23	0.398	1	6203	tags=57%, list=32%, signal=84%
												1597	GOBP_SOMITOGENESIS	76	-0.4	-1.18	0.131	0.398	1	4757	tags=39%, list=25%, signal=52%
												1598	GOBP_ANTIVIRAL_INNATE_IMMUNE_RESPONSE	47	-0.42	-1.18	0.17	0.398	1	3714	tags=32%, list=19%, signal=39%
												1599	GOBP_REGULATION_OF_ACTIVIN_RECEPTOR_SIGNALING_PATHWAY	28	-0.45	-1.18	0.198	0.398	1	7871	tags=61%, list=41%, signal=103%
												1600	GOBP_POSITIVE_REGULATION_OF_AMIDE_METABOLIC_PROCESS	165	-0.38	-1.18	0.074	0.399	1	7646	tags=56%, list=40%, signal=92%
												1601	GOBP_REGULATION_OF_CYCLIN_DEPENDENT_PROTEIN_KINASE_ACTIVITY	72	-0.4	-1.18	0.141	0.399	1	5243	tags=39%, list=27%, signal=53%
												1602	GOBP_POSITIVE_REGULATION_OF_NATURAL_KILLER_CELL_ACTIVATION	34	-0.44	-1.18	0.173	0.399	1	6250	tags=50%, list=33%, signal=74%
												1603	GOBP_NUCLEOLUS_ORGANIZATION	17	-0.49	-1.18	0.214	0.4	1	7503	tags=65%, list=39%, signal=106%
												1604	GOBP_PROTEIN_N_LINKED_GLYCOSYLATION	60	-0.41	-1.18	0.16	0.401	1	7109	tags=63%, list=37%, signal=100%
												1605	GOBP_REGULATION_OF_REACTIVE_OXYGEN_SPECIES_METABOLIC_PROCESS	162	-0.38	-1.18	0.054	0.4	1	6611	tags=43%, list=34%, signal=65%
												1606	GOBP_NEGATIVE_REGULATION_OF_ERK1_AND_ERK2_CASCADE	77	-0.4	-1.18	0.13	0.401	1	8462	tags=60%, list=44%, signal=106%
												1607	GOBP_POSITIVE_REGULATION_OF_ESTABLISHMENT_OF_PROTEIN_LOCALIZATION	351	-0.38	-1.18	0.013	0.402	1	7640	tags=52%, list=40%, signal=85%
												1608	GOBP_PURINERGIC_NUCLEOTIDE_RECEPTOR_SIGNALING_PATHWAY	15	-0.49	-1.18	0.238	0.402	1	5741	tags=53%, list=30%, signal=76%
												1609	GOBP_REGULATION_OF_POSITIVE_CHEMOTAXIS	27	-0.44	-1.18	0.217	0.402	1	1940	tags=22%, list=10%, signal=25%
												1610	GOBP_POSITIVE_REGULATION_OF_MITOTIC_CELL_CYCLE_PHASE_TRANSITION	95	-0.39	-1.18	0.106	0.402	1	6553	tags=43%, list=34%, signal=65%
												1611	GOBP_POSITIVE_REGULATION_OF_VOLTAGE_GATED_POTASSIUM_CHANNEL_ACTIVITY	16	-0.49	-1.18	0.231	0.402	1	4770	tags=44%, list=25%, signal=58%
												1612	GOBP_REGULATION_OF_WOUND_HEALING	123	-0.39	-1.18	0.089	0.403	1	3444	tags=31%, list=18%, signal=37%
												1613	GOBP_POSITIVE_REGULATION_OF_CYTOSKELETON_ORGANIZATION	190	-0.38	-1.18	0.054	0.403	1	6183	tags=43%, list=32%, signal=63%
												1614	GOBP_CHAPERONE_MEDIATED_PROTEIN_FOLDING	60	-0.4	-1.18	0.159	0.403	1	6032	tags=43%, list=31%, signal=63%
												1615	GOBP_POSITIVE_REGULATION_OF_MYELOID_CELL_DIFFERENTIATION	113	-0.39	-1.18	0.101	0.403	1	6683	tags=42%, list=35%, signal=63%
												1616	GOBP_NEGATIVE_REGULATION_OF_RESPONSE_TO_BIOTIC_STIMULUS	147	-0.39	-1.18	0.064	0.403	1	7690	tags=48%, list=40%, signal=79%
												1617	GOBP_SPHINGOLIPID_BIOSYNTHETIC_PROCESS	96	-0.4	-1.18	0.116	0.403	1	6698	tags=47%, list=35%, signal=72%
												1618	GOBP_BONE_GROWTH	40	-0.42	-1.18	0.181	0.403	1	3977	tags=30%, list=21%, signal=38%
												1619	GOBP_POSITIVE_REGULATION_OF_PROTEIN_POLYMERIZATION	90	-0.4	-1.18	0.12	0.403	1	6854	tags=46%, list=36%, signal=71%
												1620	GOBP_COLLAGEN_CATABOLIC_PROCESS	39	-0.42	-1.18	0.181	0.403	1	3208	tags=26%, list=17%, signal=31%
												1621	GOBP_REGULATION_OF_CYTOKINESIS	85	-0.4	-1.18	0.136	0.403	1	8161	tags=55%, list=43%, signal=96%
												1622	GOBP_REGULATION_OF_LEUKOCYTE_ADHESION_TO_VASCULAR_ENDOTHELIAL_CELL	34	-0.43	-1.18	0.203	0.403	1	2759	tags=29%, list=14%, signal=34%
												1623	GOBP_ENDOTHELIAL_CELL_MIGRATION	225	-0.38	-1.18	0.038	0.404	1	7809	tags=55%, list=41%, signal=91%
												1624	GOBP_RESPONSE_TO_COCAINE	43	-0.42	-1.18	0.183	0.403	1	2743	tags=26%, list=14%, signal=30%
												1625	GOBP_REGULATION_OF_MUSCLE_ADAPTATION	100	-0.39	-1.18	0.109	0.403	1	7416	tags=55%, list=39%, signal=89%
												1626	GOBP_MYELOID_CELL_DIFFERENTIATION	451	-0.37	-1.18	0.013	0.404	1	6893	tags=46%, list=36%, signal=71%
												1627	GOBP_POSITIVE_REGULATION_OF_TRANSMEMBRANE_TRANSPORT	268	-0.38	-1.18	0.028	0.404	1	4194	tags=31%, list=22%, signal=39%
												1628	GOBP_EMBRYONIC_BRAIN_DEVELOPMENT	26	-0.44	-1.18	0.222	0.404	1	5459	tags=38%, list=28%, signal=54%
												1629	GOBP_MESENCHYMAL_CELL_DIFFERENTIATION	253	-0.38	-1.18	0.03	0.404	1	7224	tags=51%, list=38%, signal=81%
												1630	GOBP_VESICLE_ORGANIZATION	349	-0.37	-1.18	0.016	0.404	1	5917	tags=43%, list=31%, signal=61%
												1631	GOBP_MEMBRANE_DEPOLARIZATION	96	-0.39	-1.18	0.113	0.404	1	4555	tags=32%, list=24%, signal=42%
												1632	GOBP_SNRNA_TRANSCRIPTION	18	-0.47	-1.18	0.221	0.405	1	5481	tags=56%, list=29%, signal=78%
												1633	GOBP_REGULATION_OF_RELEASE_OF_SEQUESTERED_CALCIUM_ION_INTO_CYTOSOL	77	-0.4	-1.18	0.132	0.405	1	8368	tags=60%, list=44%, signal=106%
												1634	GOBP_REGULATION_OF_STRIATED_MUSCLE_CONTRACTION	84	-0.39	-1.18	0.139	0.405	1	6488	tags=50%, list=34%, signal=75%
												1635	GOBP_MRNA_CATABOLIC_PROCESS	237	-0.38	-1.18	0.024	0.405	1	6870	tags=46%, list=36%, signal=71%
												1636	GOBP_POSITIVE_REGULATION_OF_OSTEOBLAST_DIFFERENTIATION	73	-0.4	-1.18	0.142	0.405	1	7326	tags=53%, list=38%, signal=86%
												1637	GOBP_T_CELL_DIFFERENTIATION_IN_THYMUS	105	-0.39	-1.18	0.11	0.405	1	7400	tags=52%, list=39%, signal=85%
												1638	GOBP_RNA_3_END_PROCESSING	96	-0.39	-1.18	0.125	0.406	1	7614	tags=52%, list=40%, signal=86%
												1639	GOBP_REGULATION_OF_EXTRINSIC_APOPTOTIC_SIGNALING_PATHWAY	161	-0.38	-1.18	0.061	0.406	1	6685	tags=49%, list=35%, signal=75%
												1640	GOBP_NEUROTRANSMITTER_METABOLIC_PROCESS	28	-0.44	-1.18	0.204	0.405	1	3572	tags=36%, list=19%, signal=44%
												1641	GOBP_POSITIVE_REGULATION_OF_UBIQUITIN_DEPENDENT_PROTEIN_CATABOLIC_PROCESS	102	-0.39	-1.18	0.108	0.405	1	7170	tags=51%, list=37%, signal=81%
												1642	GOBP_RESPONSE_TO_PEPTIDE	436	-0.37	-1.18	0.007	0.406	1	7634	tags=50%, list=40%, signal=81%
												1643	GOBP_CELL_CYCLE_G2_M_PHASE_TRANSITION	149	-0.38	-1.18	0.069	0.405	1	4231	tags=34%, list=22%, signal=43%
												1644	GOBP_POSITIVE_REGULATION_OF_ENDOTHELIAL_CELL_PROLIFERATION	99	-0.39	-1.18	0.119	0.406	1	5017	tags=37%, list=26%, signal=50%
												1645	GOBP_POSITIVE_REGULATION_OF_TRANSFORMING_GROWTH_FACTOR_BETA_PRODUCTION	19	-0.47	-1.18	0.23	0.406	1	6862	tags=58%, list=36%, signal=90%
												1646	GOBP_NEGATIVE_REGULATION_OF_CYTOSOLIC_CALCIUM_ION_CONCENTRATION	24	-0.45	-1.18	0.232	0.407	1	8642	tags=75%, list=45%, signal=136%
												1647	GOBP_DEVELOPMENT_OF_PRIMARY_SEXUAL_CHARACTERISTICS	241	-0.38	-1.18	0.028	0.407	1	6164	tags=40%, list=32%, signal=58%
												1648	GOBP_DENDRITIC_SPINE_MAINTENANCE	28	-0.43	-1.18	0.24	0.407	1	7167	tags=54%, list=37%, signal=85%
												1649	GOBP_NEGATIVE_REGULATION_OF_DENDRITIC_SPINE_DEVELOPMENT	17	-0.48	-1.18	0.232	0.407	1	4514	tags=47%, list=24%, signal=61%
												1650	GOBP_REGULATED_EXOCYTOSIS	256	-0.37	-1.18	0.047	0.407	1	7822	tags=53%, list=41%, signal=89%
												1651	GOBP_TRANSLATIONAL_INITIATION	103	-0.39	-1.18	0.108	0.406	1	6815	tags=49%, list=36%, signal=75%
												1652	GOBP_REGULATION_OF_MACROPHAGE_ACTIVATION	57	-0.41	-1.18	0.157	0.407	1	7419	tags=58%, list=39%, signal=94%
												1653	GOBP_POSITIVE_REGULATION_OF_CELL_KILLING	75	-0.4	-1.18	0.152	0.406	1	7569	tags=53%, list=39%, signal=88%
												1654	GOBP_NEGATIVE_REGULATION_OF_CALCIUM_ION_TRANSPORT	70	-0.4	-1.18	0.14	0.407	1	5316	tags=46%, list=28%, signal=63%
												1655	GOBP_SPONTANEOUS_SYNAPTIC_TRANSMISSION	18	-0.47	-1.18	0.239	0.408	1	6799	tags=61%, list=35%, signal=95%
												1656	GOBP_GLYCEROLIPID_BIOSYNTHETIC_PROCESS	211	-0.38	-1.18	0.045	0.409	1	7553	tags=51%, list=39%, signal=84%
												1657	GOBP_REGULATION_OF_PROTEIN_TYROSINE_KINASE_ACTIVITY	69	-0.4	-1.18	0.138	0.409	1	6618	tags=57%, list=35%, signal=86%
												1658	GOBP_EPITHELIAL_CELL_CELL_ADHESION	16	-0.48	-1.18	0.246	0.408	1	5566	tags=50%, list=29%, signal=70%
												1659	GOBP_NEGATIVE_REGULATION_OF_CYSTEINE_TYPE_ENDOPEPTIDASE_ACTIVITY	84	-0.39	-1.18	0.123	0.408	1	9697	tags=64%, list=51%, signal=129%
												1660	GOBP_MITRAL_VALVE_DEVELOPMENT	15	-0.49	-1.18	0.212	0.408	1	6247	tags=67%, list=33%, signal=99%
												1661	GOBP_PROTEIN_LOCALIZATION_TO_CHROMOSOME	108	-0.39	-1.18	0.108	0.408	1	7603	tags=51%, list=40%, signal=84%
												1662	GOBP_COPII_COATED_VESICLE_BUDDING	35	-0.43	-1.18	0.197	0.408	1	7584	tags=54%, list=40%, signal=90%
												1663	GOBP_POSITIVE_REGULATION_OF_ENDOTHELIAL_CELL_MIGRATION	109	-0.39	-1.18	0.103	0.409	1	6909	tags=50%, list=36%, signal=78%
												1664	GOBP_REGULATION_OF_NATURAL_KILLER_CELL_DIFFERENTIATION	19	-0.46	-1.18	0.231	0.408	1	7895	tags=58%, list=41%, signal=98%
												1665	GOBP_REGULATION_OF_MITOTIC_CELL_CYCLE_PHASE_TRANSITION	334	-0.37	-1.18	0.019	0.409	1	6828	tags=44%, list=36%, signal=67%
												1666	GOBP_NUCLEUS_ORGANIZATION	135	-0.38	-1.17	0.081	0.41	1	5819	tags=40%, list=30%, signal=57%
												1667	GOBP_CARDIAC_CHAMBER_MORPHOGENESIS	149	-0.39	-1.17	0.085	0.41	1	6557	tags=46%, list=34%, signal=70%
												1668	GOBP_RESPONSE_TO_EPIDERMAL_GROWTH_FACTOR	41	-0.42	-1.17	0.187	0.41	1	2647	tags=29%, list=14%, signal=34%
												1669	GOBP_REGULATION_OF_HIPPO_SIGNALING	21	-0.46	-1.17	0.229	0.41	1	9235	tags=81%, list=48%, signal=156%
												1670	GOBP_CYTOPLASMIC_MICROTUBULE_ORGANIZATION	62	-0.4	-1.17	0.153	0.41	1	7039	tags=53%, list=37%, signal=84%
												1671	GOBP_LEUKOCYTE_AGGREGATION	18	-0.47	-1.17	0.24	0.41	1	5231	tags=33%, list=27%, signal=46%
												1672	GOBP_ACIDIC_AMINO_ACID_TRANSPORT	74	-0.4	-1.17	0.144	0.41	1	7850	tags=65%, list=41%, signal=109%
												1673	GOBP_EPITHELIAL_CELL_DIFFERENTIATION_INVOLVED_IN_PROSTATE_GLAND_DEVELOPMENT	15	-0.49	-1.17	0.241	0.411	1	6250	tags=53%, list=33%, signal=79%
												1674	GOBP_REGULATION_OF_MUSCLE_HYPERTROPHY	78	-0.4	-1.17	0.141	0.411	1	7416	tags=58%, list=39%, signal=94%
												1675	GOBP_MITOTIC_NUCLEAR_DIVISION	257	-0.38	-1.17	0.034	0.411	1	7825	tags=52%, list=41%, signal=86%
												1676	GOBP_INTERFERON_BETA_PRODUCTION	67	-0.4	-1.17	0.131	0.411	1	7632	tags=54%, list=40%, signal=89%
												1677	GOBP_CELLULAR_RESPONSE_TO_TOXIC_SUBSTANCE	55	-0.41	-1.17	0.173	0.411	1	7775	tags=53%, list=41%, signal=88%
												1678	GOBP_REGULATION_OF_TRANSCRIPTION_BY_RNA_POLYMERASE_III	25	-0.45	-1.17	0.227	0.411	1	5385	tags=40%, list=28%, signal=56%
												1679	GOBP_REGULATION_OF_MULTICELLULAR_ORGANISM_GROWTH	87	-0.39	-1.17	0.121	0.411	1	7811	tags=59%, list=41%, signal=98%
												1680	GOBP_SYNAPTIC_VESICLE_RECYCLING	89	-0.39	-1.17	0.125	0.411	1	5125	tags=38%, list=27%, signal=52%
												1681	GOBP_ACTIN_FILAMENT_ORGANIZATION	458	-0.37	-1.17	0.012	0.411	1	7126	tags=45%, list=37%, signal=70%
												1682	GOBP_GLYCOLIPID_CATABOLIC_PROCESS	16	-0.48	-1.17	0.239	0.411	1	7113	tags=56%, list=37%, signal=89%
												1683	GOBP_REGULATION_OF_MYOBLAST_PROLIFERATION	21	-0.46	-1.17	0.238	0.411	1	7953	tags=62%, list=41%, signal=106%
												1684	GOBP_VASCULOGENESIS_INVOLVED_IN_CORONARY_VASCULAR_MORPHOGENESIS	16	-0.48	-1.17	0.243	0.411	1	2733	tags=38%, list=14%, signal=44%
												1685	GOBP_CELLULAR_RESPONSE_TO_ALKALOID	29	-0.44	-1.17	0.23	0.411	1	7850	tags=62%, list=41%, signal=105%
												1686	GOBP_NEGATIVE_REGULATION_OF_CELL_DEVELOPMENT	305	-0.37	-1.17	0.028	0.411	1	7690	tags=53%, list=40%, signal=87%
												1687	GOBP_NEGATIVE_REGULATION_OF_LIPID_METABOLIC_PROCESS	113	-0.39	-1.17	0.106	0.411	1	5660	tags=38%, list=30%, signal=54%
												1688	GOBP_HEMATOPOIETIC_STEM_CELL_HOMEOSTASIS	29	-0.44	-1.17	0.206	0.411	1	4759	tags=41%, list=25%, signal=55%
												1689	GOBP_NEGATIVE_REGULATION_OF_CELL_GROWTH	199	-0.38	-1.17	0.063	0.411	1	5488	tags=39%, list=29%, signal=54%
												1690	GOBP_RESPONSE_TO_NITRIC_OXIDE	17	-0.47	-1.17	0.24	0.411	1	6530	tags=59%, list=34%, signal=89%
												1691	GOBP_SEGMENTATION	118	-0.39	-1.17	0.099	0.411	1	4942	tags=37%, list=26%, signal=50%
												1692	GOBP_REGULATION_OF_NEURON_APOPTOTIC_PROCESS	302	-0.37	-1.17	0.025	0.412	1	5577	tags=38%, list=29%, signal=52%
												1693	GOBP_POSITIVE_REGULATION_OF_MACROPHAGE_CHEMOTAXIS	24	-0.45	-1.17	0.216	0.412	1	7170	tags=54%, list=37%, signal=86%
												1694	GOBP_POSITIVE_REGULATION_OF_INFLAMMATORY_RESPONSE	140	-0.38	-1.17	0.079	0.412	1	7621	tags=48%, list=40%, signal=79%
												1695	GOBP_MORPHOGENESIS_OF_AN_EPITHELIAL_BUD	18	-0.47	-1.17	0.245	0.412	1	7468	tags=72%, list=39%, signal=118%
												1696	GOBP_POSITIVE_REGULATION_OF_SMOOTH_MUSCLE_CELL_DIFFERENTIATION	15	-0.49	-1.17	0.234	0.412	1	6646	tags=60%, list=35%, signal=92%
												1697	GOBP_MOLTING_CYCLE_PROCESS	117	-0.39	-1.17	0.122	0.413	1	6658	tags=48%, list=35%, signal=73%
												1698	GOBP_REGULATION_OF_FLAGELLATED_SPERM_MOTILITY	22	-0.45	-1.17	0.235	0.413	1	3180	tags=32%, list=17%, signal=38%
												1699	GOBP_POSITIVE_REGULATION_OF_CALCIUM_ION_TRANSPORT	142	-0.38	-1.17	0.086	0.413	1	4194	tags=32%, list=22%, signal=41%
												1700	GOBP_DNA_REPLICATION	270	-0.37	-1.17	0.033	0.413	1	5385	tags=37%, list=28%, signal=51%
												1701	GOBP_LAYER_FORMATION_IN_CEREBRAL_CORTEX	16	-0.48	-1.17	0.241	0.413	1	7822	tags=69%, list=41%, signal=116%
												1702	GOBP_REGULATION_OF_SYSTEMIC_ARTERIAL_BLOOD_PRESSURE_MEDIATED_BY_A_CHEMICAL_SIGNAL	53	-0.41	-1.17	0.191	0.413	1	4373	tags=36%, list=23%, signal=46%
												1703	GOBP_NEGATIVE_REGULATION_OF_EPITHELIAL_CELL_PROLIFERATION	162	-0.38	-1.17	0.085	0.413	1	8187	tags=56%, list=43%, signal=96%
												1704	GOBP_INTERLEUKIN_8_PRODUCTION	75	-0.4	-1.17	0.153	0.413	1	6909	tags=44%, list=36%, signal=69%
												1705	GOBP_POSITIVE_REGULATION_OF_MITOTIC_CELL_CYCLE	129	-0.39	-1.17	0.105	0.413	1	8489	tags=58%, list=44%, signal=104%
												1706	GOBP_POSITIVE_REGULATION_OF_LYMPHOCYTE_APOPTOTIC_PROCESS	21	-0.46	-1.17	0.226	0.413	1	5741	tags=48%, list=30%, signal=68%
												1707	GOBP_REGULATION_OF_NUCLEOTIDE_BIOSYNTHETIC_PROCESS	36	-0.43	-1.17	0.202	0.413	1	8161	tags=67%, list=43%, signal=116%
												1708	GOBP_REGULATION_OF_NEURON_DIFFERENTIATION	234	-0.38	-1.17	0.043	0.414	1	6122	tags=43%, list=32%, signal=63%
												1709	GOBP_REGULATION_OF_ENDOTHELIAL_CELL_CHEMOTAXIS	23	-0.45	-1.17	0.236	0.414	1	3887	tags=39%, list=20%, signal=49%
												1710	GOBP_REGULATION_OF_MICROTUBULE_POLYMERIZATION	55	-0.41	-1.17	0.177	0.414	1	7279	tags=49%, list=38%, signal=79%
												1711	GOBP_REGULATION_OF_CHEMOTAXIS	230	-0.37	-1.17	0.044	0.414	1	7633	tags=47%, list=40%, signal=77%
												1712	GOBP_REGULATION_OF_CALCIUM_ION_DEPENDENT_EXOCYTOSIS	50	-0.41	-1.17	0.204	0.413	1	3806	tags=36%, list=20%, signal=45%
												1713	GOBP_VESICLE_CARGO_LOADING	24	-0.45	-1.17	0.229	0.414	1	3041	tags=33%, list=16%, signal=40%
												1714	GOBP_ACTIN_FILAMENT_BUNDLE_ORGANIZATION	177	-0.38	-1.17	0.075	0.414	1	7167	tags=47%, list=37%, signal=74%
												1715	GOBP_NEGATIVE_REGULATION_OF_EXOCYTOSIS	37	-0.43	-1.17	0.196	0.413	1	6501	tags=51%, list=34%, signal=78%
												1716	GOBP_REGULATION_OF_NUCLEAR_TRANSCRIBED_MRNA_POLY_A_TAIL_SHORTENING	15	-0.49	-1.17	0.237	0.414	1	7480	tags=73%, list=39%, signal=120%
												1717	GOBP_REGULATION_OF_VESICLE_FUSION	32	-0.43	-1.17	0.214	0.414	1	8649	tags=69%, list=45%, signal=125%
												1718	GOBP_REGULATION_OF_HEMATOPOIETIC_PROGENITOR_CELL_DIFFERENTIATION	42	-0.42	-1.17	0.199	0.413	1	9539	tags=74%, list=50%, signal=147%
												1719	GOBP_PROTEIN_LOCALIZATION_TO_EXTRACELLULAR_REGION	424	-0.37	-1.17	0.017	0.413	1	7588	tags=51%, list=40%, signal=82%
												1720	GOBP_NEGATIVE_REGULATION_OF_GLIAL_CELL_PROLIFERATION	23	-0.45	-1.17	0.232	0.413	1	9228	tags=83%, list=48%, signal=159%
												1721	GOBP_INTESTINAL_ABSORPTION	41	-0.42	-1.17	0.196	0.413	1	6863	tags=49%, list=36%, signal=76%
												1722	GOBP_NEGATIVE_REGULATION_OF_EXTRINSIC_APOPTOTIC_SIGNALING_PATHWAY	95	-0.39	-1.17	0.124	0.414	1	6265	tags=45%, list=33%, signal=67%
												1723	GOBP_RENAL_SYSTEM_PROCESS	125	-0.38	-1.17	0.11	0.414	1	4301	tags=32%, list=22%, signal=41%
												1724	GOBP_LIVER_MORPHOGENESIS	35	-0.42	-1.17	0.227	0.414	1	8700	tags=63%, list=45%, signal=115%
												1725	GOBP_EPITHELIAL_CELL_APOPTOTIC_PROCESS	159	-0.38	-1.17	0.089	0.414	1	5672	tags=42%, list=30%, signal=58%
												1726	GOBP_REGULATION_OF_GLIOGENESIS	140	-0.38	-1.17	0.089	0.414	1	8489	tags=61%, list=44%, signal=108%
												1727	GOBP_SIGNAL_TRANSDUCTION_IN_RESPONSE_TO_DNA_DAMAGE	179	-0.38	-1.17	0.06	0.415	1	9464	tags=61%, list=49%, signal=119%
												1728	GOBP_POSITIVE_REGULATION_OF_VIRAL_LIFE_CYCLE	26	-0.44	-1.17	0.231	0.416	1	2551	tags=27%, list=13%, signal=31%
												1729	GOBP_CELLULAR_RESPONSE_TO_PEPTIDE	334	-0.37	-1.17	0.021	0.416	1	7634	tags=51%, list=40%, signal=84%
												1730	GOBP_HISTONE_MRNA_METABOLIC_PROCESS	20	-0.46	-1.17	0.223	0.416	1	7504	tags=70%, list=39%, signal=115%
												1731	GOBP_CELL_CELL_ADHESION_VIA_PLASMA_MEMBRANE_ADHESION_MOLECULES	200	-0.38	-1.17	0.063	0.415	1	6838	tags=50%, list=36%, signal=77%
												1732	GOBP_OSSIFICATION	435	-0.37	-1.17	0.016	0.416	1	7235	tags=45%, list=38%, signal=71%
												1733	GOBP_DEVELOPMENT_OF_PRIMARY_MALE_SEXUAL_CHARACTERISTICS	137	-0.38	-1.17	0.093	0.415	1	6148	tags=39%, list=32%, signal=58%
												1734	GOBP_COLLAGEN_FIBRIL_ORGANIZATION	59	-0.4	-1.17	0.168	0.415	1	5392	tags=41%, list=28%, signal=56%
												1735	GOBP_POSITIVE_REGULATION_OF_CHEMOTAXIS	154	-0.38	-1.17	0.079	0.415	1	7326	tags=47%, list=38%, signal=75%
												1736	GOBP_DICARBOXYLIC_ACID_TRANSPORT	100	-0.39	-1.17	0.129	0.415	1	8247	tags=61%, list=43%, signal=106%
												1737	GOBP_CERAMIDE_BIOSYNTHETIC_PROCESS	67	-0.4	-1.17	0.18	0.415	1	6698	tags=46%, list=35%, signal=71%
												1738	GOBP_REGULATION_OF_STEM_CELL_POPULATION_MAINTENANCE	75	-0.39	-1.17	0.156	0.415	1	6891	tags=41%, list=36%, signal=64%
												1739	GOBP_CALCIUM_ION_IMPORT	55	-0.41	-1.17	0.173	0.415	1	4532	tags=40%, list=24%, signal=52%
												1740	GOBP_REGULATION_OF_BONE_MINERALIZATION	84	-0.39	-1.17	0.136	0.415	1	7745	tags=57%, list=40%, signal=95%
												1741	GOBP_CONNECTIVE_TISSUE_DEVELOPMENT	309	-0.37	-1.17	0.034	0.416	1	7457	tags=48%, list=39%, signal=77%
												1742	GOBP_POSITIVE_REGULATION_OF_NEURON_MIGRATION	24	-0.45	-1.17	0.232	0.416	1	6485	tags=54%, list=34%, signal=82%
												1743	GOBP_RUFFLE_ORGANIZATION	54	-0.41	-1.17	0.171	0.416	1	4762	tags=37%, list=25%, signal=49%
												1744	GOBP_RESPONSE_TO_CADMIUM_ION	40	-0.42	-1.17	0.205	0.416	1	4481	tags=35%, list=23%, signal=46%
												1745	GOBP_CELL_CYCLE_G1_S_PHASE_TRANSITION	254	-0.37	-1.17	0.055	0.417	1	6552	tags=42%, list=34%, signal=63%
												1746	GOBP_REGULATION_OF_PROTEIN_DEPHOSPHORYLATION	81	-0.39	-1.17	0.143	0.417	1	9485	tags=70%, list=49%, signal=139%
												1747	GOBP_TRNA_WOBBLE_URIDINE_MODIFICATION	16	-0.48	-1.17	0.252	0.417	1	7271	tags=63%, list=38%, signal=101%
												1748	GOBP_REGULATION_OF_SPINDLE_ORGANIZATION	41	-0.42	-1.17	0.2	0.417	1	6146	tags=44%, list=32%, signal=64%
												1749	GOBP_CAMERA_TYPE_EYE_PHOTORECEPTOR_CELL_DIFFERENTIATION	41	-0.42	-1.17	0.222	0.417	1	5658	tags=44%, list=30%, signal=62%
												1750	GOBP_NEGATIVE_REGULATION_OF_ERBB_SIGNALING_PATHWAY	32	-0.43	-1.17	0.221	0.417	1	9709	tags=75%, list=51%, signal=152%
												1751	GOBP_BLASTOCYST_GROWTH	30	-0.43	-1.17	0.221	0.418	1	3135	tags=30%, list=16%, signal=36%
												1752	GOBP_RESPONSE_TO_MISFOLDED_PROTEIN	24	-0.45	-1.17	0.242	0.418	1	5424	tags=50%, list=28%, signal=70%
												1753	GOBP_MORPHOGENESIS_OF_EMBRYONIC_EPITHELIUM	184	-0.38	-1.17	0.061	0.417	1	7423	tags=53%, list=39%, signal=85%
												1754	GOBP_PROTEIN_DEPOLYMERIZATION	129	-0.38	-1.17	0.102	0.418	1	6139	tags=43%, list=32%, signal=62%
												1755	GOBP_REGULATION_OF_AUTOPHAGOSOME_ASSEMBLY	45	-0.41	-1.17	0.2	0.418	1	7544	tags=56%, list=39%, signal=91%
												1756	GOBP_POSITIVE_REGULATION_OF_AUTOPHAGOSOME_ASSEMBLY	19	-0.46	-1.17	0.247	0.419	1	7544	tags=63%, list=39%, signal=104%
												1757	GOBP_MISMATCH_REPAIR	24	-0.44	-1.17	0.23	0.419	1	8631	tags=67%, list=45%, signal=121%
												1758	GOBP_THYMOCYTE_APOPTOTIC_PROCESS	25	-0.45	-1.17	0.243	0.419	1	2927	tags=36%, list=15%, signal=42%
												1759	GOBP_REGULATION_OF_AMYLOID_PRECURSOR_PROTEIN_CATABOLIC_PROCESS	43	-0.42	-1.17	0.203	0.419	1	7505	tags=58%, list=39%, signal=95%
												1760	GOBP_POSITIVE_REGULATION_OF_MIRNA_METABOLIC_PROCESS	59	-0.41	-1.16	0.169	0.419	1	7136	tags=54%, list=37%, signal=86%
												1761	GOBP_CALCIUM_ION_IMPORT_ACROSS_PLASMA_MEMBRANE	42	-0.41	-1.16	0.206	0.419	1	2791	tags=26%, list=15%, signal=31%
												1762	GOBP_TRABECULA_MORPHOGENESIS	57	-0.4	-1.16	0.187	0.42	1	6566	tags=51%, list=34%, signal=77%
												1763	GOBP_CIRCADIAN_REGULATION_OF_GENE_EXPRESSION	73	-0.4	-1.16	0.155	0.42	1	8439	tags=62%, list=44%, signal=110%
												1764	GOBP_CD4_POSITIVE_ALPHA_BETA_T_CELL_PROLIFERATION	27	-0.43	-1.16	0.228	0.42	1	4534	tags=48%, list=24%, signal=63%
												1765	GOBP_POSITIVE_REGULATION_OF_PEPTIDASE_ACTIVITY	184	-0.38	-1.16	0.073	0.42	1	4541	tags=35%, list=24%, signal=46%
												1766	GOBP_SODIUM_ION_TRANSMEMBRANE_TRANSPORT	165	-0.38	-1.16	0.089	0.42	1	3620	tags=26%, list=19%, signal=32%
												1767	GOBP_CELLULAR_RESPONSE_TO_LIPOPROTEIN_PARTICLE_STIMULUS	33	-0.42	-1.16	0.233	0.42	1	2694	tags=33%, list=14%, signal=39%
												1768	GOBP_PHOSPHATIDYLINOSITOL_METABOLIC_PROCESS	144	-0.38	-1.16	0.089	0.42	1	7553	tags=53%, list=39%, signal=86%
												1769	GOBP_REGULATION_OF_T_CELL_MEDIATED_IMMUNITY	86	-0.39	-1.16	0.141	0.42	1	7342	tags=56%, list=38%, signal=90%
												1770	GOBP_POSITIVE_REGULATION_OF_AMINE_TRANSPORT	55	-0.4	-1.16	0.189	0.42	1	6164	tags=49%, list=32%, signal=72%
												1771	GOBP_RESPONSE_TO_HYDROGEN_PEROXIDE	92	-0.39	-1.16	0.157	0.42	1	7095	tags=47%, list=37%, signal=74%
												1772	GOBP_CELLULAR_SENESCENCE	87	-0.39	-1.16	0.129	0.42	1	9034	tags=63%, list=47%, signal=119%
												1773	GOBP_MOVEMENT_IN_HOST	113	-0.38	-1.16	0.104	0.42	1	4508	tags=33%, list=24%, signal=43%
												1774	GOBP_POSTSYNAPTIC_SPECIALIZATION_ORGANIZATION	56	-0.4	-1.16	0.21	0.42	1	5802	tags=43%, list=30%, signal=61%
												1775	GOBP_NEGATIVE_REGULATION_OF_ESTABLISHMENT_OF_PROTEIN_LOCALIZATION	151	-0.38	-1.16	0.086	0.42	1	7337	tags=51%, list=38%, signal=82%
												1776	GOBP_B_CELL_ACTIVATION	287	-0.37	-1.16	0.036	0.42	1	6611	tags=44%, list=34%, signal=65%
												1777	GOBP_NEUROTRANSMITTER_TRANSPORT	226	-0.37	-1.16	0.063	0.42	1	7889	tags=53%, list=41%, signal=88%
												1778	GOBP_CELLULAR_RESPONSE_TO_STEROL	22	-0.45	-1.16	0.252	0.42	1	2055	tags=27%, list=11%, signal=31%
												1779	GOBP_NEGATIVE_REGULATION_OF_SMOOTHENED_SIGNALING_PATHWAY	40	-0.41	-1.16	0.215	0.42	1	9617	tags=75%, list=50%, signal=150%
												1780	GOBP_CELLULAR_RESPONSE_TO_CALCIUM_ION	87	-0.39	-1.16	0.148	0.42	1	6756	tags=43%, list=35%, signal=65%
												1781	GOBP_APOPTOTIC_PROCESS_INVOLVED_IN_DEVELOPMENT	45	-0.41	-1.16	0.194	0.42	1	6641	tags=44%, list=35%, signal=68%
												1782	GOBP_MITOTIC_CYTOKINETIC_PROCESS	24	-0.44	-1.16	0.23	0.42	1	4429	tags=38%, list=23%, signal=49%
												1783	GOBP_NEURON_INTRINSIC_APOPTOTIC_SIGNALING_PATHWAY_IN_RESPONSE_TO_OXIDATIVE_STRESS	20	-0.46	-1.16	0.238	0.42	1	7003	tags=50%, list=37%, signal=79%
												1784	GOBP_REGULATION_OF_INCLUSION_BODY_ASSEMBLY	18	-0.47	-1.16	0.257	0.42	1	10001	tags=78%, list=52%, signal=162%
												1785	GOBP_CERAMIDE_CATABOLIC_PROCESS	20	-0.46	-1.16	0.234	0.42	1	3121	tags=35%, list=16%, signal=42%
												1786	GOBP_DEVELOPMENTAL_MATURATION	372	-0.37	-1.16	0.024	0.42	1	7255	tags=46%, list=38%, signal=73%
												1787	GOBP_POSITIVE_REGULATION_OF_ACTIN_FILAMENT_BUNDLE_ASSEMBLY	67	-0.4	-1.16	0.186	0.421	1	3757	tags=33%, list=20%, signal=41%
												1788	GOBP_NEGATIVE_REGULATION_OF_REACTIVE_OXYGEN_SPECIES_METABOLIC_PROCESS	53	-0.41	-1.16	0.194	0.421	1	5372	tags=42%, list=28%, signal=58%
												1789	GOBP_RHYTHMIC_PROCESS	308	-0.37	-1.16	0.027	0.421	1	7157	tags=49%, list=37%, signal=77%
												1790	GOBP_ADIPOSE_TISSUE_DEVELOPMENT	66	-0.4	-1.16	0.161	0.421	1	7457	tags=50%, list=39%, signal=82%
												1791	GOBP_NEGATIVE_REGULATION_OF_PHOSPHORUS_METABOLIC_PROCESS	413	-0.36	-1.16	0.011	0.421	1	7008	tags=46%, list=37%, signal=71%
												1792	GOBP_POSITIVE_REGULATION_OF_P38MAPK_CASCADE	29	-0.43	-1.16	0.225	0.421	1	3060	tags=31%, list=16%, signal=37%
												1793	GOBP_REGULATION_OF_MITOCHONDRIAL_DEPOLARIZATION	23	-0.45	-1.16	0.232	0.422	1	5741	tags=43%, list=30%, signal=62%
												1794	GOBP_NEGATIVE_REGULATION_OF_BINDING	159	-0.37	-1.16	0.082	0.423	1	5699	tags=41%, list=30%, signal=58%
												1795	GOBP_RESPONSE_TO_ORGANOPHOSPHORUS	95	-0.39	-1.16	0.136	0.423	1	5741	tags=38%, list=30%, signal=54%
												1796	GOBP_REGULATION_OF_PHOSPHOLIPID_BIOSYNTHETIC_PROCESS	21	-0.45	-1.16	0.248	0.422	1	5657	tags=52%, list=29%, signal=74%
												1797	GOBP_MACROPHAGE_ACTIVATION	103	-0.38	-1.16	0.144	0.423	1	7483	tags=52%, list=39%, signal=86%
												1798	GOBP_REGULATION_OF_PROTEIN_SECRETION	316	-0.37	-1.16	0.026	0.423	1	7499	tags=52%, list=39%, signal=84%
												1799	GOBP_NEGATIVE_REGULATION_OF_MITOTIC_CELL_CYCLE_PHASE_TRANSITION	177	-0.37	-1.16	0.081	0.423	1	6828	tags=45%, list=36%, signal=69%
												1800	GOBP_REGULATION_OF_REGULATED_SECRETORY_PATHWAY	156	-0.38	-1.16	0.084	0.423	1	7822	tags=53%, list=41%, signal=89%
												1801	GOBP_MYOTUBE_CELL_DEVELOPMENT	47	-0.41	-1.16	0.191	0.423	1	5347	tags=38%, list=28%, signal=53%
												1802	GOBP_SYNAPTIC_VESICLE_CLUSTERING	20	-0.46	-1.16	0.235	0.423	1	7721	tags=70%, list=40%, signal=117%
												1803	GOBP_REGULATION_OF_ORGANELLE_ASSEMBLY	221	-0.37	-1.16	0.055	0.423	1	7544	tags=48%, list=39%, signal=79%
												1804	GOBP_TRIGLYCERIDE_BIOSYNTHETIC_PROCESS	45	-0.41	-1.16	0.202	0.423	1	7311	tags=51%, list=38%, signal=82%
												1805	GOBP_POSITIVE_REGULATION_OF_DNA_BIOSYNTHETIC_PROCESS	75	-0.39	-1.16	0.177	0.423	1	6909	tags=48%, list=36%, signal=75%
												1806	GOBP_POSITIVE_REGULATION_OF_CALCIUM_ION_TRANSMEMBRANE_TRANSPORT	102	-0.39	-1.16	0.138	0.423	1	3557	tags=28%, list=19%, signal=35%
												1807	GOBP_REGULATION_OF_SUPRAMOLECULAR_FIBER_ORGANIZATION	384	-0.37	-1.16	0.023	0.423	1	7488	tags=48%, list=39%, signal=77%
												1808	GOBP_NEGATIVE_REGULATION_OF_SIGNAL_TRANSDUCTION_IN_ABSENCE_OF_LIGAND	31	-0.43	-1.16	0.225	0.423	1	6265	tags=48%, list=33%, signal=72%
												1809	GOBP_REGULATION_OF_NEUTROPHIL_CHEMOTAXIS	34	-0.42	-1.16	0.232	0.424	1	6652	tags=50%, list=35%, signal=76%
												1810	GOBP_NEGATIVE_REGULATION_OF_CELLULAR_CATABOLIC_PROCESS	193	-0.37	-1.16	0.065	0.424	1	7440	tags=50%, list=39%, signal=80%
												1811	GOBP_REGULATION_OF_SUBSTRATE_ADHESION_DEPENDENT_CELL_SPREADING	59	-0.4	-1.16	0.195	0.423	1	3286	tags=32%, list=17%, signal=39%
												1812	GOBP_EMBRYO_IMPLANTATION	69	-0.4	-1.16	0.172	0.424	1	4493	tags=26%, list=23%, signal=34%
												1813	GOBP_DETECTION_OF_STIMULUS_INVOLVED_IN_SENSORY_PERCEPTION_OF_PAIN	40	-0.42	-1.16	0.229	0.424	1	2334	tags=28%, list=12%, signal=31%
												1814	GOBP_REGULATION_OF_NMDA_RECEPTOR_ACTIVITY	28	-0.43	-1.16	0.237	0.423	1	7806	tags=61%, list=41%, signal=102%
												1815	GOBP_POSITIVE_REGULATION_OF_PEPTIDYL_SERINE_PHOSPHORYLATION	101	-0.39	-1.16	0.12	0.423	1	5309	tags=40%, list=28%, signal=54%
												1816	GOBP_REGULATION_OF_RECEPTOR_SIGNALING_PATHWAY_VIA_STAT	119	-0.38	-1.16	0.125	0.423	1	5197	tags=29%, list=27%, signal=39%
												1817	GOBP_PROTEIN_LOCALIZATION_TO_PLASMA_MEMBRANE	305	-0.37	-1.16	0.037	0.423	1	7827	tags=51%, list=41%, signal=85%
												1818	GOBP_CEREBELLAR_CORTEX_FORMATION	33	-0.42	-1.16	0.227	0.423	1	7215	tags=55%, list=38%, signal=87%
												1819	GOBP_CHROMOSOME_LOCALIZATION	107	-0.38	-1.16	0.125	0.423	1	7209	tags=50%, list=38%, signal=79%
												1820	GOBP_PHOSPHOLIPASE_C_ACTIVATING_G_PROTEIN_COUPLED_RECEPTOR_SIGNALING_PATHWAY	105	-0.38	-1.16	0.135	0.423	1	7487	tags=51%, list=39%, signal=84%
												1821	GOBP_REGULATION_OF_EMBRYONIC_DEVELOPMENT	90	-0.39	-1.16	0.151	0.423	1	5507	tags=37%, list=29%, signal=51%
												1822	GOBP_POSITIVE_REGULATION_OF_CAMP_MEDIATED_SIGNALING	30	-0.43	-1.16	0.228	0.424	1	3416	tags=37%, list=18%, signal=45%
												1823	GOBP_HYALURONAN_METABOLIC_PROCESS	40	-0.41	-1.16	0.223	0.424	1	6718	tags=48%, list=35%, signal=73%
												1824	GOBP_RESPONSE_TO_ACID_CHEMICAL	141	-0.38	-1.16	0.109	0.424	1	7980	tags=43%, list=42%, signal=72%
												1825	GOBP_NEGATIVE_REGULATION_OF_INSULIN_SECRETION	58	-0.4	-1.16	0.194	0.424	1	4741	tags=40%, list=25%, signal=53%
												1826	GOBP_REGULATION_OF_CYSTEINE_TYPE_ENDOPEPTIDASE_ACTIVITY	229	-0.37	-1.16	0.06	0.424	1	7522	tags=50%, list=39%, signal=81%
												1827	GOBP_NEGATIVE_REGULATION_OF_PROGRAMMED_NECROTIC_CELL_DEATH	18	-0.46	-1.16	0.259	0.424	1	2121	tags=28%, list=11%, signal=31%
												1828	GOBP_NEGATIVE_REGULATION_OF_RECEPTOR_MEDIATED_ENDOCYTOSIS	29	-0.43	-1.16	0.236	0.424	1	3184	tags=34%, list=17%, signal=41%
												1829	GOBP_REGULATION_OF_DEPHOSPHORYLATION	119	-0.38	-1.16	0.119	0.425	1	8574	tags=60%, list=45%, signal=107%
												1830	GOBP_REGULATION_OF_DENDRITE_EXTENSION	33	-0.43	-1.16	0.236	0.424	1	5469	tags=45%, list=29%, signal=63%
												1831	GOBP_CHAPERONE_MEDIATED_PROTEIN_COMPLEX_ASSEMBLY	18	-0.47	-1.16	0.255	0.425	1	6428	tags=56%, list=34%, signal=83%
												1832	GOBP_REGULATION_OF_SYNAPTIC_VESICLE_CYCLE	17	-0.47	-1.16	0.255	0.425	1	9237	tags=88%, list=48%, signal=170%
												1833	GOBP_CELLULAR_RESPONSE_TO_HYDROGEN_PEROXIDE	62	-0.4	-1.16	0.188	0.426	1	6698	tags=47%, list=35%, signal=72%
												1834	GOBP_DNA_MODIFICATION	79	-0.4	-1.16	0.166	0.426	1	6008	tags=42%, list=31%, signal=61%
												1835	GOBP_RESPONSE_TO_CORTICOSTEROID	100	-0.38	-1.16	0.152	0.426	1	6991	tags=44%, list=36%, signal=69%
												1836	GOBP_PROTEIN_LOCALIZATION_TO_ENDOPLASMIC_RETICULUM	72	-0.39	-1.16	0.186	0.426	1	7525	tags=56%, list=39%, signal=91%
												1837	GOBP_CALCIUM_ION_TRANSPORT	448	-0.36	-1.16	0.023	0.426	1	5042	tags=34%, list=26%, signal=46%
												1838	GOBP_EMBRYONIC_ORGAN_MORPHOGENESIS	330	-0.37	-1.16	0.031	0.426	1	6907	tags=42%, list=36%, signal=65%
												1839	GOBP_RESPIRATORY_SYSTEM_DEVELOPMENT	265	-0.37	-1.16	0.061	0.426	1	7326	tags=49%, list=38%, signal=78%
												1840	GOBP_REGULATION_OF_STEM_CELL_DIFFERENTIATION	84	-0.39	-1.16	0.18	0.426	1	5506	tags=40%, list=29%, signal=57%
												1841	GOBP_TISSUE_HOMEOSTASIS	273	-0.37	-1.16	0.045	0.426	1	4180	tags=31%, list=22%, signal=39%
												1842	GOBP_EPIDERMAL_GROWTH_FACTOR_RECEPTOR_SIGNALING_PATHWAY	104	-0.38	-1.16	0.144	0.426	1	8604	tags=56%, list=45%, signal=101%
												1843	GOBP_POSITIVE_REGULATION_OF_TRANSLATION	135	-0.38	-1.16	0.114	0.426	1	7646	tags=56%, list=40%, signal=92%
												1844	GOBP_REGULATION_OF_EPITHELIAL_CELL_DIFFERENTIATION_INVOLVED_IN_KIDNEY_DEVELOPMENT	17	-0.47	-1.16	0.245	0.426	1	3127	tags=29%, list=16%, signal=35%
												1845	GOBP_REGULATION_OF_REPRODUCTIVE_PROCESS	220	-0.37	-1.16	0.064	0.426	1	3467	tags=26%, list=18%, signal=32%
												1846	GOBP_HOMOLOGOUS_CHROMOSOME_PAIRING_AT_MEIOSIS	56	-0.4	-1.16	0.19	0.427	1	3115	tags=20%, list=16%, signal=23%
												1847	GOBP_STRIATED_MUSCLE_CELL_APOPTOTIC_PROCESS	72	-0.4	-1.16	0.184	0.427	1	7465	tags=50%, list=39%, signal=82%
												1848	GOBP_REGULATION_OF_ORGAN_GROWTH	117	-0.38	-1.16	0.135	0.427	1	4290	tags=33%, list=22%, signal=43%
												1849	GOBP_STEROID_HORMONE_SECRETION	32	-0.43	-1.16	0.237	0.427	1	7541	tags=53%, list=39%, signal=87%
												1850	GOBP_HEMATOPOIETIC_STEM_CELL_DIFFERENTIATION	35	-0.42	-1.16	0.232	0.429	1	6122	tags=49%, list=32%, signal=71%
												1851	GOBP_ESTABLISHMENT_OF_SPINDLE_ORIENTATION	42	-0.41	-1.16	0.222	0.429	1	2555	tags=26%, list=13%, signal=30%
												1852	GOBP_REGULATION_OF_POSTSYNAPTIC_DENSITY_ORGANIZATION	19	-0.46	-1.16	0.252	0.429	1	1666	tags=26%, list=9%, signal=29%
												1853	GOBP_REGULATION_OF_GLIAL_CELL_DIFFERENTIATION	96	-0.39	-1.16	0.134	0.429	1	8474	tags=63%, list=44%, signal=111%
												1854	GOBP_PROTEIN_NITROSYLATION	15	-0.49	-1.16	0.266	0.429	1	7416	tags=60%, list=39%, signal=98%
												1855	GOBP_CEREBELLAR_CORTEX_MORPHOGENESIS	46	-0.41	-1.16	0.217	0.429	1	7215	tags=52%, list=38%, signal=83%
												1856	GOBP_CELL_PROLIFERATION_IN_FOREBRAIN	38	-0.42	-1.15	0.224	0.429	1	8701	tags=66%, list=45%, signal=120%
												1857	GOBP_ENDOPLASMIC_RETICULUM_TO_CYTOSOL_TRANSPORT	26	-0.44	-1.15	0.251	0.429	1	6818	tags=54%, list=36%, signal=83%
												1858	GOBP_HEART_GROWTH	115	-0.38	-1.15	0.135	0.429	1	6782	tags=49%, list=35%, signal=75%
												1859	GOBP_NEGATIVE_REGULATION_OF_GENE_EXPRESSION_EPIGENETIC	114	-0.38	-1.15	0.136	0.43	1	7669	tags=51%, list=40%, signal=84%
												1860	GOBP_POSITIVE_REGULATION_OF_CELL_CYCLE	351	-0.36	-1.15	0.042	0.43	1	7890	tags=49%, list=41%, signal=82%
												1861	GOBP_POSITIVE_REGULATION_OF_REACTIVE_OXYGEN_SPECIES_METABOLIC_PROCESS	81	-0.39	-1.15	0.146	0.43	1	3143	tags=25%, list=16%, signal=29%
												1862	GOBP_REGULATION_OF_CALCIUM_ION_TRANSPORT	285	-0.37	-1.15	0.058	0.43	1	5658	tags=38%, list=30%, signal=53%
												1863	GOBP_NEGATIVE_REGULATION_OF_STEM_CELL_POPULATION_MAINTENANCE	25	-0.44	-1.15	0.258	0.43	1	9859	tags=72%, list=51%, signal=148%
												1864	GOBP_ISOTYPE_SWITCHING_TO_IGG_ISOTYPES	17	-0.47	-1.15	0.26	0.43	1	3370	tags=35%, list=18%, signal=43%
												1865	GOBP_POSITIVE_REGULATION_OF_DNA_BINDING_TRANSCRIPTION_FACTOR_ACTIVITY	258	-0.37	-1.15	0.056	0.43	1	8101	tags=55%, list=42%, signal=95%
												1866	GOBP_PYROPTOSIS	36	-0.42	-1.15	0.244	0.43	1	5085	tags=36%, list=27%, signal=49%
												1867	GOBP_POSITIVE_REGULATION_OF_MYOTUBE_DIFFERENTIATION	15	-0.48	-1.15	0.264	0.43	1	5982	tags=53%, list=31%, signal=77%
												1868	GOBP_AXON_GUIDANCE	242	-0.37	-1.15	0.065	0.43	1	7255	tags=51%, list=38%, signal=81%
												1869	GOBP_REGULATION_OF_PHOSPHOPROTEIN_PHOSPHATASE_ACTIVITY	49	-0.4	-1.15	0.208	0.43	1	9460	tags=71%, list=49%, signal=141%
												1870	GOBP_POSITIVE_REGULATION_OF_PROTEOLYSIS	352	-0.36	-1.15	0.041	0.431	1	7379	tags=49%, list=38%, signal=78%
												1871	GOBP_RETINOIC_ACID_METABOLIC_PROCESS	29	-0.43	-1.15	0.274	0.431	1	6023	tags=45%, list=31%, signal=65%
												1872	GOBP_DNA_METHYLATION_DEPENDENT_HETEROCHROMATIN_FORMATION	32	-0.42	-1.15	0.243	0.431	1	9980	tags=66%, list=52%, signal=137%
												1873	GOBP_REGULATION_OF_TRANSLATION_IN_RESPONSE_TO_STRESS	23	-0.45	-1.15	0.24	0.431	1	4116	tags=43%, list=21%, signal=55%
												1874	GOBP_STORE_OPERATED_CALCIUM_ENTRY	26	-0.44	-1.15	0.254	0.432	1	5011	tags=38%, list=26%, signal=52%
												1875	GOBP_ADRENAL_GLAND_DEVELOPMENT	25	-0.44	-1.15	0.256	0.432	1	2255	tags=32%, list=12%, signal=36%
												1876	GOBP_RESPONSE_TO_ACETYLCHOLINE	41	-0.41	-1.15	0.237	0.432	1	4194	tags=37%, list=22%, signal=47%
												1877	GOBP_NEGATIVE_REGULATION_OF_REPRODUCTIVE_PROCESS	78	-0.39	-1.15	0.17	0.432	1	7281	tags=46%, list=38%, signal=74%
												1878	GOBP_REGULATION_OF_FEEDING_BEHAVIOR	40	-0.41	-1.15	0.227	0.432	1	4846	tags=35%, list=25%, signal=47%
												1879	GOBP_SOMITE_DEVELOPMENT	94	-0.38	-1.15	0.157	0.432	1	3775	tags=33%, list=20%, signal=41%
												1880	GOBP_RECEPTOR_CLUSTERING	73	-0.39	-1.15	0.176	0.432	1	7484	tags=52%, list=39%, signal=85%
												1881	GOBP_POSITIVE_REGULATION_OF_CYTOSOLIC_CALCIUM_ION_CONCENTRATION	192	-0.37	-1.15	0.078	0.432	1	7347	tags=45%, list=38%, signal=73%
												1882	GOBP_NEGATIVE_REGULATION_OF_ALPHA_BETA_T_CELL_ACTIVATION	46	-0.41	-1.15	0.23	0.432	1	5160	tags=41%, list=27%, signal=56%
												1883	GOBP_POSITIVE_REGULATION_OF_DEPHOSPHORYLATION	55	-0.4	-1.15	0.225	0.432	1	9485	tags=69%, list=49%, signal=136%
												1884	GOBP_POSITIVE_REGULATION_OF_POTASSIUM_ION_TRANSMEMBRANE_TRANSPORTER_ACTIVITY	27	-0.43	-1.15	0.246	0.432	1	4927	tags=44%, list=26%, signal=60%
												1885	GOBP_FEAR_RESPONSE	63	-0.39	-1.15	0.194	0.432	1	2977	tags=25%, list=16%, signal=30%
												1886	GOBP_REGULATION_OF_PROTEIN_BINDING	219	-0.37	-1.15	0.078	0.432	1	7185	tags=49%, list=37%, signal=77%
												1887	GOBP_POSITIVE_REGULATION_OF_CYSTEINE_TYPE_ENDOPEPTIDASE_ACTIVITY	143	-0.38	-1.15	0.104	0.432	1	7674	tags=53%, list=40%, signal=88%
												1888	GOBP_METAPHASE_CHROMOSOME_ALIGNMENT	86	-0.39	-1.15	0.171	0.432	1	8865	tags=60%, list=46%, signal=112%
												1889	GOBP_NUCLEAR_TRANSCRIBED_MRNA_CATABOLIC_PROCESS	120	-0.38	-1.15	0.128	0.432	1	9004	tags=61%, list=47%, signal=114%
												1890	GOBP_ERYTHROCYTE_MATURATION	20	-0.45	-1.15	0.251	0.432	1	6893	tags=65%, list=36%, signal=101%
												1891	GOBP_ENDOPLASMIC_RETICULUM_TO_GOLGI_VESICLE_MEDIATED_TRANSPORT	120	-0.38	-1.15	0.125	0.432	1	8478	tags=59%, list=44%, signal=105%
												1892	GOBP_FEMALE_GENITALIA_DEVELOPMENT	18	-0.46	-1.15	0.248	0.432	1	6831	tags=56%, list=36%, signal=86%
												1893	GOBP_FORMATION_OF_PRIMARY_GERM_LAYER	107	-0.38	-1.15	0.145	0.432	1	3166	tags=29%, list=17%, signal=35%
												1894	GOBP_SYMPATHETIC_NERVOUS_SYSTEM_DEVELOPMENT	24	-0.44	-1.15	0.265	0.432	1	4942	tags=50%, list=26%, signal=67%
												1895	GOBP_REGULATION_OF_JUN_KINASE_ACTIVITY	71	-0.39	-1.15	0.203	0.432	1	6967	tags=49%, list=36%, signal=77%
												1896	GOBP_REGULATION_OF_MUSCLE_SYSTEM_PROCESS	250	-0.37	-1.15	0.065	0.432	1	6670	tags=46%, list=35%, signal=70%
												1897	GOBP_EXTRINSIC_APOPTOTIC_SIGNALING_PATHWAY	229	-0.37	-1.15	0.072	0.433	1	6731	tags=47%, list=35%, signal=72%
												1898	GOBP_POSITIVE_REGULATION_OF_PROTEIN_BINDING	100	-0.38	-1.15	0.149	0.433	1	7167	tags=55%, list=37%, signal=87%
												1899	GOBP_REGULATION_OF_ENDOPLASMIC_RETICULUM_STRESS_INDUCED_INTRINSIC_APOPTOTIC_SIGNALING_PATHWAY	31	-0.43	-1.15	0.259	0.433	1	5694	tags=42%, list=30%, signal=60%
												1900	GOBP_POSITIVE_REGULATION_OF_SMOOTH_MUSCLE_CONTRACTION	35	-0.42	-1.15	0.221	0.434	1	2443	tags=29%, list=13%, signal=33%
												1901	GOBP_NEGATIVE_REGULATION_OF_DOUBLE_STRAND_BREAK_REPAIR_VIA_HOMOLOGOUS_RECOMBINATION	22	-0.45	-1.15	0.256	0.434	1	8753	tags=59%, list=46%, signal=109%
												1902	GOBP_OLIGOSACCHARIDE_CATABOLIC_PROCESS	16	-0.48	-1.15	0.254	0.434	1	5061	tags=44%, list=26%, signal=59%
												1903	GOBP_NUCLEOTIDE_TRANSMEMBRANE_TRANSPORT	21	-0.45	-1.15	0.249	0.434	1	4505	tags=43%, list=23%, signal=56%
												1904	GOBP_MORPHOGENESIS_OF_AN_EPITHELIAL_FOLD	29	-0.43	-1.15	0.248	0.435	1	7468	tags=62%, list=39%, signal=101%
												1905	GOBP_ERK1_AND_ERK2_CASCADE	354	-0.36	-1.15	0.037	0.435	1	7621	tags=50%, list=40%, signal=81%
												1906	GOBP_CELL_COMMUNICATION_BY_ELECTRICAL_COUPLING	19	-0.46	-1.15	0.263	0.435	1	4770	tags=42%, list=25%, signal=56%
												1907	GOBP_EPITHELIAL_CELL_FATE_COMMITMENT	17	-0.46	-1.15	0.264	0.435	1	3062	tags=35%, list=16%, signal=42%
												1908	GOBP_ESTABLISHMENT_OF_PROTEIN_LOCALIZATION_TO_MEMBRANE	259	-0.37	-1.15	0.05	0.435	1	6083	tags=42%, list=32%, signal=60%
												1909	GOBP_AMINE_TRANSPORT	132	-0.38	-1.15	0.123	0.434	1	6799	tags=51%, list=35%, signal=78%
												1910	GOBP_REGULATION_OF_PIGMENTATION	16	-0.48	-1.15	0.256	0.435	1	824	tags=25%, list=4%, signal=26%
												1911	GOBP_PROTEIN_LOCALIZATION_TO_CELL_CELL_JUNCTION	24	-0.45	-1.15	0.265	0.435	1	7110	tags=67%, list=37%, signal=106%
												1912	GOBP_SPLICEOSOMAL_COMPLEX_ASSEMBLY	45	-0.4	-1.15	0.237	0.435	1	9671	tags=69%, list=50%, signal=139%
												1913	GOBP_RESPONSE_TO_TUMOR_NECROSIS_FACTOR	184	-0.37	-1.15	0.08	0.435	1	6791	tags=44%, list=35%, signal=68%
												1914	GOBP_POSITIVE_REGULATION_OF_CELL_ADHESION	500	-0.36	-1.15	0.012	0.435	1	7342	tags=47%, list=38%, signal=74%
												1915	GOBP_POSITIVE_REGULATION_OF_SYNAPTIC_TRANSMISSION_GLUTAMATERGIC	42	-0.41	-1.15	0.22	0.435	1	7816	tags=57%, list=41%, signal=96%
												1916	GOBP_NUCLEOBASE_CONTAINING_COMPOUND_TRANSPORT	190	-0.37	-1.15	0.086	0.435	1	8443	tags=58%, list=44%, signal=102%
												1917	GOBP_NEGATIVE_REGULATION_OF_GLUCOSE_IMPORT	20	-0.46	-1.15	0.262	0.435	1	6164	tags=50%, list=32%, signal=74%
												1918	GOBP_NEGATIVE_REGULATION_OF_BLOOD_CIRCULATION	26	-0.44	-1.15	0.272	0.435	1	7267	tags=62%, list=38%, signal=99%
												1919	GOBP_EMBRYONIC_DIGIT_MORPHOGENESIS	71	-0.39	-1.15	0.181	0.435	1	5478	tags=44%, list=29%, signal=61%
												1920	GOBP_NEGATIVE_REGULATION_OF_TRANSLATIONAL_INITIATION	15	-0.48	-1.15	0.268	0.435	1	6641	tags=53%, list=35%, signal=82%
												1921	GOBP_REGULATION_OF_RESPONSE_TO_OXIDATIVE_STRESS	37	-0.41	-1.15	0.248	0.436	1	5597	tags=51%, list=29%, signal=72%
												1922	GOBP_REGULATION_OF_ENDOTHELIAL_CELL_MIGRATION	174	-0.37	-1.15	0.103	0.437	1	7809	tags=55%, list=41%, signal=91%
												1923	GOBP_MRNA_MODIFICATION	35	-0.42	-1.15	0.243	0.437	1	4716	tags=37%, list=25%, signal=49%
												1924	GOBP_REGULATION_OF_INTRINSIC_APOPTOTIC_SIGNALING_PATHWAY	189	-0.37	-1.15	0.097	0.438	1	5490	tags=37%, list=29%, signal=51%
												1925	GOBP_REGULATION_OF_NECROPTOTIC_PROCESS	23	-0.45	-1.15	0.263	0.438	1	7003	tags=48%, list=37%, signal=75%
												1926	GOBP_REGULATION_OF_CELL_CYCLE_G2_M_PHASE_TRANSITION	116	-0.38	-1.15	0.15	0.438	1	9342	tags=63%, list=49%, signal=122%
												1927	GOBP_POSITIVE_REGULATION_OF_B_CELL_ACTIVATION	88	-0.39	-1.15	0.159	0.438	1	6425	tags=41%, list=34%, signal=61%
												1928	GOBP_DOUBLE_STRAND_BREAK_REPAIR_VIA_NONHOMOLOGOUS_END_JOINING	62	-0.4	-1.15	0.204	0.438	1	6157	tags=42%, list=32%, signal=62%
												1929	GOBP_LIPID_STORAGE	94	-0.38	-1.15	0.17	0.438	1	7827	tags=52%, list=41%, signal=88%
												1930	GOBP_GAMMA_AMINOBUTYRIC_ACID_SECRETION	19	-0.45	-1.15	0.272	0.438	1	3598	tags=42%, list=19%, signal=52%
												1931	GOBP_REGULATION_OF_SYNAPTIC_TRANSMISSION_GLUTAMATERGIC	88	-0.38	-1.15	0.168	0.438	1	7612	tags=55%, list=40%, signal=90%
												1932	GOBP_CELLULAR_RESPONSE_TO_INTERLEUKIN_1	79	-0.39	-1.15	0.181	0.438	1	6738	tags=46%, list=35%, signal=70%
												1933	GOBP_CELL_PROLIFERATION_INVOLVED_IN_KIDNEY_DEVELOPMENT	22	-0.44	-1.15	0.277	0.438	1	2361	tags=32%, list=12%, signal=36%
												1934	GOBP_GLUTAMATERGIC_NEURON_DIFFERENTIATION	27	-0.44	-1.15	0.257	0.438	1	7081	tags=52%, list=37%, signal=82%
												1935	GOBP_REGULATION_OF_ASTROCYTE_DIFFERENTIATION	36	-0.42	-1.15	0.245	0.438	1	8447	tags=67%, list=44%, signal=119%
												1936	GOBP_DNA_DAMAGE_RESPONSE_SIGNAL_TRANSDUCTION_BY_P53_CLASS_MEDIATOR	68	-0.4	-1.15	0.197	0.438	1	7642	tags=49%, list=40%, signal=80%
												1937	GOBP_PHASIC_SMOOTH_MUSCLE_CONTRACTION	29	-0.43	-1.15	0.275	0.438	1	2117	tags=28%, list=11%, signal=31%
												1938	GOBP_REGULATION_OF_EXOCYTOSIS	220	-0.37	-1.15	0.069	0.438	1	8756	tags=59%, list=46%, signal=107%
												1939	GOBP_SPHINGOID_METABOLIC_PROCESS	22	-0.45	-1.15	0.257	0.438	1	4155	tags=41%, list=22%, signal=52%
												1940	GOBP_P38MAPK_CASCADE	56	-0.4	-1.15	0.215	0.438	1	5506	tags=43%, list=29%, signal=60%
												1941	GOBP_VASCULAR_ASSOCIATED_SMOOTH_MUSCLE_CELL_APOPTOTIC_PROCESS	15	-0.48	-1.15	0.299	0.439	1	3537	tags=27%, list=18%, signal=33%
												1942	GOBP_EXOCYTOSIS	381	-0.36	-1.15	0.038	0.439	1	7825	tags=53%, list=41%, signal=88%
												1943	GOBP_REGULATION_OF_MUSCLE_CONTRACTION	160	-0.37	-1.15	0.106	0.439	1	6501	tags=45%, list=34%, signal=68%
												1944	GOBP_REGULATION_OF_ACTIN_FILAMENT_ORGANIZATION	273	-0.37	-1.15	0.065	0.439	1	6205	tags=41%, list=32%, signal=60%
												1945	GOBP_REGULATION_OF_DEVELOPMENT_HETEROCHRONIC	15	-0.48	-1.15	0.278	0.439	1	4137	tags=33%, list=22%, signal=42%
												1946	GOBP_LONG_CHAIN_FATTY_ACID_BIOSYNTHETIC_PROCESS	21	-0.45	-1.15	0.264	0.439	1	3696	tags=33%, list=19%, signal=41%
												1947	GOBP_MIRNA_TRANSCRIPTION	74	-0.38	-1.14	0.198	0.442	1	7136	tags=55%, list=37%, signal=88%
												1948	GOBP_LIPID_EXPORT_FROM_CELL	56	-0.4	-1.14	0.202	0.442	1	7541	tags=48%, list=39%, signal=79%
												1949	GOBP_MYOBLAST_PROLIFERATION	26	-0.44	-1.14	0.28	0.442	1	7953	tags=58%, list=41%, signal=98%
												1950	GOBP_RESPONSE_TO_INTERLEUKIN_17	25	-0.44	-1.14	0.272	0.442	1	5719	tags=40%, list=30%, signal=57%
												1951	GOBP_NUCLEUS_LOCALIZATION	44	-0.41	-1.14	0.236	0.441	1	9060	tags=64%, list=47%, signal=120%
												1952	GOBP_NEUROBLAST_DIVISION	16	-0.47	-1.14	0.29	0.441	1	4919	tags=44%, list=26%, signal=59%
												1953	GOBP_FORELIMB_MORPHOGENESIS	47	-0.41	-1.14	0.234	0.442	1	6646	tags=51%, list=35%, signal=78%
												1954	GOBP_PROTEIN_DNA_COMPLEX_ASSEMBLY	163	-0.37	-1.14	0.116	0.442	1	7810	tags=50%, list=41%, signal=84%
												1955	GOBP_PEPTIDE_HORMONE_PROCESSING	26	-0.44	-1.14	0.293	0.443	1	8208	tags=69%, list=43%, signal=121%
												1956	GOBP_AMINO_ACID_BIOSYNTHETIC_PROCESS	67	-0.39	-1.14	0.189	0.442	1	9132	tags=61%, list=48%, signal=116%
												1957	GOBP_DOSAGE_COMPENSATION	32	-0.42	-1.14	0.248	0.442	1	3132	tags=31%, list=16%, signal=37%
												1958	GOBP_TOOTH_MINERALIZATION	32	-0.42	-1.14	0.248	0.443	1	6425	tags=53%, list=34%, signal=80%
												1959	GOBP_STRIATED_MUSCLE_TISSUE_DEVELOPMENT	289	-0.36	-1.14	0.053	0.443	1	6657	tags=44%, list=35%, signal=67%
												1960	GOBP_ACTIVATION_OF_PROTEIN_KINASE_ACTIVITY	92	-0.38	-1.14	0.179	0.444	1	4722	tags=33%, list=25%, signal=43%
												1961	GOBP_REGULATION_OF_AMIDE_METABOLIC_PROCESS	444	-0.36	-1.14	0.022	0.445	1	7559	tags=50%, list=39%, signal=80%
												1962	GOBP_POSITIVE_REGULATION_OF_ACTIN_NUCLEATION	15	-0.48	-1.14	0.27	0.445	1	6178	tags=53%, list=32%, signal=79%
												1963	GOBP_REGULATION_OF_LEUKOCYTE_APOPTOTIC_PROCESS	109	-0.38	-1.14	0.167	0.445	1	5741	tags=42%, list=30%, signal=60%
												1964	GOBP_REGULATION_OF_EPITHELIAL_TO_MESENCHYMAL_TRANSITION	102	-0.38	-1.14	0.146	0.445	1	5370	tags=41%, list=28%, signal=57%
												1965	GOBP_TRANSLATIONAL_ELONGATION	63	-0.39	-1.14	0.194	0.445	1	7025	tags=48%, list=37%, signal=75%
												1966	GOBP_CELLULAR_RESPONSE_TO_CADMIUM_ION	28	-0.42	-1.14	0.257	0.445	1	3990	tags=32%, list=21%, signal=41%
												1967	GOBP_EMBRYONIC_FORELIMB_MORPHOGENESIS	36	-0.42	-1.14	0.243	0.445	1	6646	tags=53%, list=35%, signal=81%
												1968	GOBP_SECRETION_BY_TISSUE	53	-0.4	-1.14	0.227	0.445	1	2918	tags=28%, list=15%, signal=33%
												1969	GOBP_MYELOID_CELL_HOMEOSTASIS	208	-0.37	-1.14	0.078	0.445	1	5619	tags=41%, list=29%, signal=58%
												1970	GOBP_ORGANELLE_FISSION	486	-0.36	-1.14	0.029	0.445	1	7344	tags=45%, list=38%, signal=71%
												1971	GOBP_POSITIVE_REGULATION_OF_RNA_SPLICING	46	-0.41	-1.14	0.229	0.445	1	6759	tags=50%, list=35%, signal=77%
												1972	GOBP_ALTERNATIVE_MRNA_SPLICING_VIA_SPLICEOSOME	72	-0.39	-1.14	0.196	0.445	1	8872	tags=60%, list=46%, signal=111%
												1973	GOBP_HISTAMINE_TRANSPORT	20	-0.45	-1.14	0.264	0.445	1	5538	tags=40%, list=29%, signal=56%
												1974	GOBP_NOTOCHORD_DEVELOPMENT	24	-0.44	-1.14	0.274	0.445	1	6360	tags=46%, list=33%, signal=68%
												1975	GOBP_RESPONSE_TO_CAMP	60	-0.39	-1.14	0.198	0.445	1	2657	tags=25%, list=14%, signal=29%
												1976	GOBP_NEGATIVE_REGULATION_OF_GLIOGENESIS	59	-0.39	-1.14	0.222	0.445	1	8489	tags=71%, list=44%, signal=127%
												1977	GOBP_REGULATION_OF_DNA_DAMAGE_CHECKPOINT	24	-0.44	-1.14	0.264	0.446	1	9681	tags=75%, list=50%, signal=151%
												1978	GOBP_POSITIVE_REGULATION_OF_MUSCLE_CELL_APOPTOTIC_PROCESS	40	-0.4	-1.14	0.252	0.447	1	7313	tags=45%, list=38%, signal=73%
												1979	GOBP_MAINTENANCE_OF_PROTEIN_LOCALIZATION_IN_ORGANELLE	43	-0.41	-1.14	0.242	0.447	1	8533	tags=56%, list=44%, signal=100%
												1980	GOBP_NEURAL_TUBE_DEVELOPMENT	195	-0.37	-1.14	0.102	0.447	1	8187	tags=58%, list=43%, signal=101%
												1981	GOBP_REGULATION_OF_MEMBRANE_DEPOLARIZATION	53	-0.4	-1.14	0.218	0.449	1	6568	tags=45%, list=34%, signal=69%
												1982	GOBP_REGULATION_OF_HETEROCHROMATIN_ORGANIZATION	23	-0.44	-1.14	0.271	0.449	1	8047	tags=57%, list=42%, signal=97%
												1983	GOBP_REGULATION_OF_HEART_GROWTH	84	-0.39	-1.14	0.177	0.449	1	4250	tags=36%, list=22%, signal=46%
												1984	GOBP_NEGATIVE_REGULATION_OF_GLYCOPROTEIN_METABOLIC_PROCESS	15	-0.47	-1.14	0.276	0.45	1	5308	tags=47%, list=28%, signal=64%
												1985	GOBP_POSITIVE_REGULATION_OF_PROTEIN_SECRETION	180	-0.37	-1.14	0.098	0.45	1	6579	tags=46%, list=34%, signal=69%
												1986	GOBP_PROTEIN_INSERTION_INTO_ER_MEMBRANE	27	-0.43	-1.14	0.273	0.45	1	6066	tags=48%, list=32%, signal=70%
												1987	GOBP_PROSTATE_GLAND_MORPHOGENESIS	34	-0.42	-1.14	0.26	0.45	1	7281	tags=56%, list=38%, signal=90%
												1988	GOBP_BEHAVIORAL_RESPONSE_TO_COCAINE	20	-0.45	-1.14	0.277	0.45	1	2743	tags=25%, list=14%, signal=29%
												1989	GOBP_NEURAL_TUBE_FORMATION	132	-0.37	-1.14	0.152	0.45	1	7423	tags=56%, list=39%, signal=91%
												1990	GOBP_REGULATION_OF_EXTRINSIC_APOPTOTIC_SIGNALING_PATHWAY_IN_ABSENCE_OF_LIGAND	42	-0.41	-1.14	0.238	0.45	1	6265	tags=48%, list=33%, signal=71%
												1991	GOBP_REGULATION_OF_SPINDLE_ASSEMBLY	27	-0.43	-1.14	0.271	0.451	1	7307	tags=52%, list=38%, signal=84%
												1992	GOBP_IRON_ION_TRANSMEMBRANE_TRANSPORT	28	-0.43	-1.14	0.29	0.451	1	6808	tags=50%, list=35%, signal=77%
												1993	GOBP_REGULATION_OF_GLUCOSE_IMPORT	68	-0.39	-1.14	0.212	0.451	1	9697	tags=71%, list=51%, signal=142%
												1994	GOBP_ISOPRENOID_BIOSYNTHETIC_PROCESS	35	-0.41	-1.14	0.276	0.451	1	7708	tags=57%, list=40%, signal=95%
												1995	GOBP_TIGHT_JUNCTION_ORGANIZATION	89	-0.38	-1.14	0.188	0.452	1	5566	tags=35%, list=29%, signal=49%
												1996	GOBP_POSITIVE_REGULATION_OF_EMBRYONIC_DEVELOPMENT	24	-0.43	-1.14	0.272	0.453	1	4032	tags=25%, list=21%, signal=32%
												1997	GOBP_INTRA_GOLGI_VESICLE_MEDIATED_TRANSPORT	29	-0.42	-1.14	0.273	0.454	1	7378	tags=55%, list=38%, signal=90%
												1998	GOBP_REGULATION_OF_HYDROGEN_PEROXIDE_METABOLIC_PROCESS	18	-0.45	-1.14	0.283	0.454	1	3984	tags=39%, list=21%, signal=49%
[truncated: 2,159 more rows]

## Sheet: Prefrontal Cortex
		Enriched in ASO samples											Enriched in Control samples
		GS	SIZE	ES	NES	NOM p-val	FDR q-val	FWER p-val	RANK AT MAX	LEADING EDGE			GS	SIZE	ES	NES	NOM p-val	FDR q-val	FWER p-val	RANK AT MAX	LEADING EDGE
	1	GOBP_RETINOL_METABOLIC_PROCESS	26	0.57	2.26	0	0.023	0.021	1906	tags=46%, list=10%, signal=51%		1	GOBP_ANTIGEN_PROCESSING_AND_PRESENTATION_VIA_MHC_CLASS_IB	17	-0.72	-1.79	0.002	0.112	0.281	1079	tags=35%, list=6%, signal=37%
	2	GOBP_RESPONSE_TO_PHEROMONE	42	0.53	2.13	0	0.031	0.056	1031	tags=14%, list=5%, signal=15%		2	GOBP_CELLULAR_RESPONSE_TO_VITAMIN	16	-0.72	-1.73	0.001	0.25	0.634	2045	tags=50%, list=11%, signal=56%
	3	GOBP_POSITIVE_REGULATION_OF_VASCULAR_ENDOTHELIAL_GROWTH_FACTOR_PRODUCTION	26	0.47	1.85	0	0.214	0.44	484	tags=23%, list=3%, signal=24%		3	GOBP_ANTIGEN_PROCESSING_AND_PRESENTATION_OF_ENDOGENOUS_ANTIGEN	20	-0.68	-1.69	0.002	0.341	0.828	3359	tags=45%, list=18%, signal=54%
	4	GOBP_NEGATIVE_REGULATION_OF_DIGESTIVE_SYSTEM_PROCESS	18	0.52	1.74	0	0.35	0.711	1801	tags=44%, list=9%, signal=49%		4	GOBP_REGULATION_OF_TRIGLYCERIDE_CATABOLIC_PROCESS	15	-0.71	-1.68	0.002	0.365	0.891	2917	tags=53%, list=15%, signal=63%
	5	GOBP_POSITIVE_REGULATION_OF_HUMORAL_IMMUNE_RESPONSE	20	0.44	1.54	0.01	0.993	0.988	1925	tags=45%, list=10%, signal=50%		5	GOBP_TRNA_WOBBLE_BASE_MODIFICATION	19	-0.67	-1.68	0	0.342	0.917	3909	tags=58%, list=20%, signal=73%
	6	GOBP_REGULATION_OF_ACROSOME_REACTION	15	0.48	1.51	0.055	0.989	0.995	1166	tags=27%, list=6%, signal=28%		6	GOBP_REGULATION_OF_ENDOTHELIAL_CELL_CHEMOTAXIS	23	-0.65	-1.66	0.002	0.396	0.956	1661	tags=30%, list=9%, signal=33%
	7	GOBP_CEREBELLAR_GRANULAR_LAYER_DEVELOPMENT	16	0.44	1.51	0.034	0.889	0.997	684	tags=31%, list=4%, signal=32%		7	GOBP_POLYAMINE_METABOLIC_PROCESS	22	-0.64	-1.66	0.003	0.359	0.959	6114	tags=68%, list=32%, signal=100%
	8	GOBP_MICROTUBULE_BASED_PROTEIN_TRANSPORT	16	0.46	1.48	0.057	0.918	0.998	672	tags=19%, list=4%, signal=19%		8	GOBP_LATERAL_MESODERM_DEVELOPMENT	17	-0.67	-1.66	0.003	0.327	0.959	5495	tags=71%, list=29%, signal=99%
	9	GOBP_REGULATION_OF_CELL_MATURATION	28	0.4	1.46	0.016	0.888	0.999	1572	tags=29%, list=8%, signal=31%		9	GOBP_NADP_METABOLIC_PROCESS	47	-0.57	-1.63	0.001	0.429	0.984	5171	tags=53%, list=27%, signal=73%
	10	GOBP_GRANULOCYTE_MACROPHAGE_COLONY_STIMULATING_FACTOR_PRODUCTION	16	0.45	1.46	0.03	0.811	0.999	869	tags=25%, list=5%, signal=26%		10	GOBP_INTERFERON_MEDIATED_SIGNALING_PATHWAY	77	-0.54	-1.62	0	0.478	0.994	5770	tags=51%, list=30%, signal=72%
	11	GOBP_ANTIFUNGAL_INNATE_IMMUNE_RESPONSE	21	0.42	1.45	0.039	0.771	0.999	1358	tags=24%, list=7%, signal=26%		11	GOBP_POSITIVE_REGULATION_OF_MEMBRANE_DEPOLARIZATION	16	-0.67	-1.61	0.008	0.494	0.994	3156	tags=56%, list=16%, signal=67%
	12	GOBP_NEURAL_NUCLEUS_DEVELOPMENT	26	0.38	1.45	0.055	0.734	0.999	560	tags=15%, list=3%, signal=16%		12	GOBP_POSITIVE_REGULATION_OF_EPIDERMAL_CELL_DIFFERENTIATION	22	-0.63	-1.61	0.002	0.486	0.996	1229	tags=27%, list=6%, signal=29%
	13	GOBP_POSITIVE_REGULATION_OF_SYNAPTIC_VESICLE_RECYCLING	17	0.43	1.44	0.064	0.72	0.999	645	tags=24%, list=3%, signal=24%		13	GOBP_CELL_MIGRATION_INVOLVED_IN_HEART_DEVELOPMENT	20	-0.64	-1.6	0.007	0.484	0.997	4947	tags=65%, list=26%, signal=88%
	14	GOBP_FOREBRAIN_NEURON_DIFFERENTIATION	53	0.32	1.41	0.042	0.791	1	1541	tags=25%, list=8%, signal=27%		14	GOBP_POSITIVE_REGULATION_OF_ENDOTHELIAL_CELL_CHEMOTAXIS	17	-0.66	-1.6	0.009	0.471	0.998	1661	tags=29%, list=9%, signal=32%
	15	GOBP_VASCULAR_ENDOTHELIAL_GROWTH_FACTOR_PRODUCTION	37	0.32	1.4	0.031	0.752	1	913	tags=19%, list=5%, signal=20%		15	GOBP_VASCULAR_WOUND_HEALING	18	-0.64	-1.59	0.004	0.493	0.999	1945	tags=28%, list=10%, signal=31%
	16	GOBP_CEREBROSPINAL_FLUID_CIRCULATION	19	0.4	1.39	0.057	0.775	1	317	tags=16%, list=2%, signal=16%		16	GOBP_SODIUM_INDEPENDENT_ORGANIC_ANION_TRANSPORT	16	-0.66	-1.58	0.008	0.556	1	840	tags=31%, list=4%, signal=33%
	17	GOBP_REGULATION_OF_HUMORAL_IMMUNE_RESPONSE	46	0.31	1.39	0	0.732	1	2037	tags=35%, list=11%, signal=39%		17	GOBP_NEGATIVE_REGULATION_OF_PEPTIDYL_SERINE_PHOSPHORYLATION	30	-0.58	-1.57	0.008	0.621	1	3454	tags=50%, list=18%, signal=61%
	18	GOBP_CELLULAR_RESPONSE_TO_ALDEHYDE	15	0.43	1.38	0.071	0.735	1	962	tags=27%, list=5%, signal=28%		18	GOBP_POSITIVE_REGULATION_OF_RECEPTOR_INTERNALIZATION	34	-0.58	-1.57	0.003	0.595	1	2869	tags=38%, list=15%, signal=45%
	19	GOBP_COMPLEMENT_ACTIVATION	48	0.32	1.37	0.028	0.727	1	1203	tags=27%, list=6%, signal=29%		19	GOBP_REGULATION_OF_MITOCHONDRIAL_GENE_EXPRESSION	32	-0.58	-1.57	0.009	0.581	1	5634	tags=59%, list=29%, signal=84%
	20	GOBP_COMPLEMENT_ACTIVATION_CLASSICAL_PATHWAY	28	0.35	1.37	0.078	0.695	1	1656	tags=36%, list=9%, signal=39%		20	GOBP_REGULATION_OF_MITOCHONDRIAL_DEPOLARIZATION	23	-0.6	-1.56	0.005	0.56	1	3156	tags=43%, list=16%, signal=52%
	21	GOBP_MELANOCYTE_DIFFERENTIATION	28	0.34	1.35	0	0.716	1	1623	tags=32%, list=8%, signal=35%		21	GOBP_NEGATIVE_REGULATION_OF_GLIAL_CELL_PROLIFERATION	23	-0.61	-1.56	0.005	0.542	1	2532	tags=39%, list=13%, signal=45%
	22	GOBP_ACUTE_PHASE_RESPONSE	34	0.32	1.35	0	0.692	1	2100	tags=35%, list=11%, signal=40%		22	GOBP_ATRIAL_CARDIAC_MUSCLE_CELL_TO_AV_NODE_CELL_COMMUNICATION	15	-0.66	-1.56	0.012	0.529	1	422	tags=27%, list=2%, signal=27%
	23	GOBP_POSITIVE_REGULATION_OF_CARDIOCYTE_DIFFERENTIATION	16	0.43	1.34	0.101	0.69	1	1725	tags=31%, list=9%, signal=34%		23	GOBP_RESPONSE_TO_TYPE_I_INTERFERON	67	-0.53	-1.56	0.001	0.516	1	5965	tags=52%, list=31%, signal=76%
	24	GOBP_RESPONSE_TO_MINERALOCORTICOID	15	0.41	1.33	0.074	0.713	1	962	tags=20%, list=5%, signal=21%		24	GOBP_REGULATION_OF_MITOCHONDRIAL_TRANSLATION	25	-0.6	-1.56	0.004	0.535	1	5634	tags=60%, list=29%, signal=85%
	25	GOBP_GLUTAMATERGIC_NEURON_DIFFERENTIATION	27	0.35	1.33	0.127	0.688	1	1148	tags=26%, list=6%, signal=28%		25	GOBP_NEGATIVE_REGULATION_OF_CELL_MIGRATION_INVOLVED_IN_SPROUTING_ANGIOGENESIS	16	-0.64	-1.55	0.018	0.522	1	2397	tags=50%, list=12%, signal=57%
	26	GOBP_PRIMARY_ALCOHOL_METABOLIC_PROCESS	74	0.28	1.32	0	0.695	1	2057	tags=27%, list=11%, signal=30%		26	GOBP_MITOCHONDRIAL_DEPOLARIZATION	27	-0.59	-1.55	0.009	0.516	1	3156	tags=41%, list=16%, signal=49%
	27	GOBP_THYROID_HORMONE_METABOLIC_PROCESS	32	0.32	1.31	0.065	0.721	1	597	tags=19%, list=3%, signal=19%		27	GOBP_POSITIVE_REGULATION_OF_EPIDERMIS_DEVELOPMENT	26	-0.59	-1.55	0.004	0.5	1	1229	tags=27%, list=6%, signal=29%
	28	GOBP_GABAERGIC_NEURON_DIFFERENTIATION	23	0.35	1.3	0.145	0.721	1	1026	tags=17%, list=5%, signal=18%		28	GOBP_TRNA_MODIFICATION	83	-0.51	-1.55	0	0.487	1	5246	tags=52%, list=27%, signal=71%
	29	GOBP_KERATINIZATION	48	0.29	1.3	0	0.698	1	1268	tags=19%, list=7%, signal=20%		29	GOBP_RENAL_SODIUM_ION_TRANSPORT	15	-0.64	-1.55	0.012	0.513	1	4771	tags=60%, list=25%, signal=80%
	30	GOBP_NEGATIVE_T_CELL_SELECTION	15	0.4	1.28	0.153	0.745	1	1637	tags=47%, list=9%, signal=51%		30	GOBP_PLASMA_MEMBRANE_FUSION	25	-0.6	-1.54	0.007	0.507	1	2547	tags=32%, list=13%, signal=37%
	31	GOBP_CELLULAR_RESPONSE_TO_ETHANOL	17	0.38	1.28	0.124	0.731	1	1397	tags=24%, list=7%, signal=25%		31	GOBP_WATER_SOLUBLE_VITAMIN_METABOLIC_PROCESS	47	-0.54	-1.54	0.002	0.497	1	3969	tags=49%, list=21%, signal=62%
	32	GOBP_NEURAL_RETINA_DEVELOPMENT	86	0.26	1.27	0	0.725	1	1731	tags=28%, list=9%, signal=31%		32	GOBP_SPINAL_CORD_PATTERNING	24	-0.6	-1.54	0.006	0.493	1	5105	tags=58%, list=27%, signal=79%
	33	GOBP_BONE_MINERALIZATION_INVOLVED_IN_BONE_MATURATION	15	0.39	1.27	0.118	0.706	1	1918	tags=33%, list=10%, signal=37%		33	GOBP_POST_EMBRYONIC_ANIMAL_ORGAN_DEVELOPMENT	20	-0.61	-1.54	0.016	0.482	1	3137	tags=45%, list=16%, signal=54%
	34	GOBP_FOREBRAIN_GENERATION_OF_NEURONS	65	0.27	1.27	0	0.698	1	1541	tags=23%, list=8%, signal=25%		34	GOBP_REGULATION_OF_PROGRAMMED_NECROTIC_CELL_DEATH	28	-0.57	-1.54	0.006	0.478	1	3788	tags=50%, list=20%, signal=62%
	35	GOBP_POSITIVE_REGULATION_OF_VESICLE_FUSION	19	0.37	1.26	0.103	0.729	1	1694	tags=26%, list=9%, signal=29%		35	GOBP_REGULATION_OF_NECROPTOTIC_PROCESS	23	-0.58	-1.54	0.013	0.47	1	3788	tags=52%, list=20%, signal=65%
	36	GOBP_GLIAL_CELL_FATE_COMMITMENT	18	0.36	1.25	0.168	0.73	1	1345	tags=33%, list=7%, signal=36%		36	GOBP_POSITIVE_REGULATION_OF_TRIGLYCERIDE_METABOLIC_PROCESS	28	-0.57	-1.54	0.004	0.464	1	3279	tags=46%, list=17%, signal=56%
	37	GOBP_I_KAPPAB_PHOSPHORYLATION	18	0.38	1.24	0.163	0.764	1	1246	tags=22%, list=6%, signal=24%		37	GOBP_ENDOTHELIAL_CELL_MORPHOGENESIS	15	-0.65	-1.53	0.012	0.475	1	2934	tags=60%, list=15%, signal=71%
	38	GOBP_REGULATION_OF_SYNAPTIC_VESICLE_MEMBRANE_ORGANIZATION	18	0.35	1.22	0.207	0.834	1	1694	tags=28%, list=9%, signal=30%		38	GOBP_REGULATION_OF_EATING_BEHAVIOR	15	-0.64	-1.53	0.011	0.468	1	3161	tags=40%, list=16%, signal=48%
	39	GOBP_POSITIVE_REGULATION_OF_PHOSPHATASE_ACTIVITY	31	0.33	1.21	0.235	0.837	1	1680	tags=26%, list=9%, signal=28%		39	GOBP_POSITIVE_REGULATION_OF_SPROUTING_ANGIOGENESIS	23	-0.59	-1.53	0.011	0.484	1	5241	tags=57%, list=27%, signal=78%
	40	GOBP_CELL_PROLIFERATION_IN_FOREBRAIN	38	0.3	1.21	0.125	0.817	1	1257	tags=24%, list=7%, signal=25%		40	GOBP_NEGATIVE_REGULATION_OF_RESPONSE_TO_CYTOKINE_STIMULUS	70	-0.52	-1.53	0.001	0.484	1	5368	tags=47%, list=28%, signal=65%
	41	GOBP_REGULATION_OF_FLAGELLATED_SPERM_MOTILITY	22	0.33	1.2	0.147	0.818	1	1875	tags=36%, list=10%, signal=40%		41	GOBP_CARDIAC_VASCULAR_SMOOTH_MUSCLE_CELL_DIFFERENTIATION	15	-0.64	-1.53	0.017	0.479	1	4418	tags=73%, list=23%, signal=95%
	42	GOBP_REGULATION_OF_LIPOPOLYSACCHARIDE_MEDIATED_SIGNALING_PATHWAY	24	0.33	1.2	0.239	0.822	1	1922	tags=42%, list=10%, signal=46%		42	GOBP_REGULATION_OF_TYPE_I_INTERFERON_MEDIATED_SIGNALING_PATHWAY	42	-0.55	-1.53	0.002	0.47	1	5770	tags=55%, list=30%, signal=78%
	43	GOBP_DETECTION_OF_LIGHT_STIMULUS	54	0.28	1.2	0.056	0.82	1	1986	tags=37%, list=10%, signal=41%		43	GOBP_REGULATION_OF_CD8_POSITIVE_ALPHA_BETA_T_CELL_ACTIVATION	24	-0.58	-1.52	0.011	0.485	1	1079	tags=33%, list=6%, signal=35%
	44	GOBP_DETECTION_OF_VISIBLE_LIGHT	33	0.29	1.2	0.14	0.803	1	1672	tags=36%, list=9%, signal=40%		44	GOBP_RESPONSE_TO_VITAMIN_D	16	-0.63	-1.52	0.012	0.505	1	2031	tags=38%, list=11%, signal=42%
	45	GOBP_RETINA_LAYER_FORMATION	22	0.32	1.18	0.225	0.832	1	1701	tags=32%, list=9%, signal=35%		45	GOBP_GLUCOCORTICOID_SECRETION	15	-0.63	-1.52	0.013	0.497	1	2095	tags=40%, list=11%, signal=45%
	46	GOBP_POSITIVE_REGULATION_OF_CALCIUM_ION_DEPENDENT_EXOCYTOSIS	19	0.33	1.18	0.192	0.847	1	1951	tags=37%, list=10%, signal=41%		46	GOBP_REGULATION_OF_POSITIVE_CHEMOTAXIS	27	-0.57	-1.51	0.015	0.518	1	1316	tags=26%, list=7%, signal=28%
	47	GOBP_POSITIVE_REGULATION_OF_OSTEOCLAST_DIFFERENTIATION	37	0.28	1.18	0.122	0.833	1	2380	tags=32%, list=12%, signal=37%		47	GOBP_PLASMA_MEMBRANE_REPAIR	28	-0.57	-1.51	0.01	0.521	1	3619	tags=46%, list=19%, signal=57%
	48	GOBP_FIBROBLAST_ACTIVATION	21	0.32	1.17	0.218	0.839	1	502	tags=19%, list=3%, signal=20%		48	GOBP_REGULATION_OF_CHROMATIN_BINDING	24	-0.58	-1.51	0.01	0.521	1	2105	tags=38%, list=11%, signal=42%
	49	GOBP_ACROSOME_REACTION	38	0.27	1.17	0.2	0.824	1	1166	tags=18%, list=6%, signal=20%		49	GOBP_REGULATION_OF_MEMBRANE_LIPID_DISTRIBUTION	57	-0.52	-1.51	0.004	0.513	1	4728	tags=53%, list=25%, signal=70%
	50	GOBP_UTERUS_DEVELOPMENT	27	0.3	1.17	0.216	0.822	1	1725	tags=33%, list=9%, signal=37%		50	GOBP_VASCULAR_ENDOTHELIAL_CELL_PROLIFERATION	30	-0.56	-1.51	0.01	0.506	1	5272	tags=60%, list=27%, signal=83%
	51	GOBP_CELL_CYCLE_PHASE	26	0.3	1.16	0.206	0.821	1	1917	tags=27%, list=10%, signal=30%		51	GOBP_NEGATIVE_REGULATION_OF_MACROAUTOPHAGY	30	-0.56	-1.51	0.005	0.497	1	5167	tags=63%, list=27%, signal=87%
	52	GOBP_EXTRACELLULAR_MATRIX_DISASSEMBLY	36	0.28	1.16	0.18	0.806	1	724	tags=11%, list=4%, signal=12%		52	GOBP_SIGNAL_TRANSDUCTION_INVOLVED_IN_REGULATION_OF_GENE_EXPRESSION	27	-0.57	-1.5	0.008	0.501	1	5514	tags=56%, list=29%, signal=78%
	53	GOBP_AMELOGENESIS	29	0.3	1.16	0.213	0.802	1	22	tags=7%, list=0%, signal=7%		53	GOBP_REGULATION_OF_T_CELL_MEDIATED_CYTOTOXICITY	35	-0.54	-1.5	0.005	0.521	1	3359	tags=34%, list=18%, signal=41%
	54	GOBP_REGULATION_OF_RESPIRATORY_BURST	17	0.34	1.15	0.233	0.821	1	1086	tags=18%, list=6%, signal=19%		54	GOBP_REGULATION_OF_MITOPHAGY	18	-0.61	-1.5	0.019	0.525	1	5146	tags=50%, list=27%, signal=68%
	55	GOBP_THYROID_HORMONE_GENERATION	21	0.33	1.15	0.185	0.811	1	597	tags=24%, list=3%, signal=25%		55	GOBP_NADPH_REGENERATION	21	-0.6	-1.49	0.022	0.541	1	3181	tags=43%, list=17%, signal=51%
	56	GOBP_AMACRINE_CELL_DIFFERENTIATION	16	0.34	1.15	0.268	0.798	1	1114	tags=25%, list=6%, signal=27%		56	GOBP_RESCUE_OF_STALLED_RIBOSOME	29	-0.56	-1.49	0.012	0.546	1	4630	tags=59%, list=24%, signal=77%
	57	GOBP_POSITIVE_REGULATION_OF_CALCIUM_MEDIATED_SIGNALING	47	0.29	1.15	0.167	0.792	1	1346	tags=23%, list=7%, signal=25%		57	GOBP_TRNA_WOBBLE_URIDINE_MODIFICATION	16	-0.62	-1.49	0.015	0.544	1	5056	tags=56%, list=26%, signal=76%
	58	GOBP_REGULATION_OF_CILIUM_MOVEMENT	42	0.27	1.15	0.229	0.785	1	1875	tags=26%, list=10%, signal=29%		58	GOBP_CELL_MIGRATION_INVOLVED_IN_SPROUTING_ANGIOGENESIS	54	-0.51	-1.49	0.001	0.541	1	5261	tags=46%, list=27%, signal=64%
	59	GOBP_TRANS_SYNAPTIC_SIGNALING_MODULATING_SYNAPTIC_TRANSMISSION	15	0.33	1.14	0.228	0.803	1	12807	tags=100%, list=67%, signal=301%		59	GOBP_ANGIOGENESIS_INVOLVED_IN_WOUND_HEALING	25	-0.57	-1.49	0.01	0.534	1	1945	tags=28%, list=10%, signal=31%
	60	GOBP_TERPENOID_METABOLIC_PROCESS	67	0.23	1.14	0.154	0.795	1	981	tags=15%, list=5%, signal=16%		60	GOBP_POSITIVE_REGULATION_OF_TYPE_I_INTERFERON_MEDIATED_SIGNALING_PATHWAY	20	-0.6	-1.49	0.013	0.529	1	4822	tags=60%, list=25%, signal=80%
	61	GOBP_FOREBRAIN_REGIONALIZATION	27	0.32	1.13	0.27	0.789	1	1567	tags=26%, list=8%, signal=28%		61	GOBP_TRNA_METHYLATION	36	-0.54	-1.49	0.007	0.528	1	4842	tags=47%, list=25%, signal=63%
	62	GOBP_NEGATIVE_REGULATION_OF_INTERLEUKIN_17_PRODUCTION	19	0.32	1.13	0.247	0.782	1	1502	tags=26%, list=8%, signal=29%		62	GOBP_ENDOTHELIAL_CELL_CHEMOTAXIS	31	-0.55	-1.48	0.015	0.545	1	5241	tags=45%, list=27%, signal=62%
	63	GOBP_INTERLEUKIN_12_PRODUCTION	65	0.24	1.13	0.2	0.776	1	1327	tags=20%, list=7%, signal=21%		63	GOBP_CELLULAR_RESPONSE_TO_VASCULAR_ENDOTHELIAL_GROWTH_FACTOR_STIMULUS	59	-0.5	-1.48	0.003	0.544	1	5303	tags=49%, list=28%, signal=68%
	64	GOBP_POSITIVE_REGULATION_OF_G_PROTEIN_COUPLED_RECEPTOR_SIGNALING_PATHWAY	32	0.29	1.12	0.265	0.799	1	951	tags=16%, list=5%, signal=16%		64	GOBP_SCHWANN_CELL_DIFFERENTIATION	52	-0.52	-1.48	0.004	0.549	1	4130	tags=42%, list=22%, signal=54%
	65	GOBP_SYNAPTIC_VESICLE_CLUSTERING	20	0.31	1.12	0.267	0.796	1	684	tags=15%, list=4%, signal=16%		65	GOBP_MITOTIC_DNA_REPLICATION	16	-0.62	-1.48	0.016	0.55	1	2232	tags=50%, list=12%, signal=57%
	66	GOBP_POSITIVE_REGULATION_OF_CYCLIN_DEPENDENT_PROTEIN_KINASE_ACTIVITY	25	0.3	1.12	0.272	0.793	1	106	tags=12%, list=1%, signal=12%		66	GOBP_NOTOCHORD_DEVELOPMENT	24	-0.57	-1.48	0.022	0.545	1	2031	tags=42%, list=11%, signal=47%
	67	GOBP_REGULATION_OF_PRESYNAPTIC_CYTOSOLIC_CALCIUM_ION_CONCENTRATION	21	0.3	1.12	0.232	0.783	1	2493	tags=43%, list=13%, signal=49%		67	GOBP_GLYCINE_METABOLIC_PROCESS	15	-0.62	-1.48	0.025	0.55	1	4601	tags=53%, list=24%, signal=70%
	68	GOBP_DETECTION_OF_LIGHT_STIMULUS_INVOLVED_IN_SENSORY_PERCEPTION	24	0.29	1.12	0.25	0.779	1	1970	tags=42%, list=10%, signal=46%		68	GOBP_CARDIAC_CELL_FATE_COMMITMENT	15	-0.63	-1.48	0.026	0.547	1	3551	tags=40%, list=19%, signal=49%
	69	GOBP_MAINTENANCE_OF_SYNAPSE_STRUCTURE	28	0.3	1.11	0.214	0.778	1	808	tags=14%, list=4%, signal=15%		69	GOBP_DRINKING_BEHAVIOR	17	-0.61	-1.48	0.021	0.545	1	1552	tags=24%, list=8%, signal=26%
	70	GOBP_SERTOLI_CELL_DIFFERENTIATION	29	0.29	1.11	0.319	0.769	1	1751	tags=28%, list=9%, signal=30%		70	GOBP_POSITIVE_REGULATION_OF_MITOCHONDRIAL_TRANSLATION	16	-0.61	-1.47	0.02	0.543	1	5634	tags=63%, list=29%, signal=88%
	71	GOBP_CELL_DIFFERENTIATION_IN_HINDBRAIN	31	0.28	1.11	0.263	0.769	1	684	tags=19%, list=4%, signal=20%		71	GOBP_INCLUSION_BODY_ASSEMBLY	26	-0.55	-1.47	0.012	0.552	1	7291	tags=69%, list=38%, signal=112%
	72	GOBP_POSITIVE_REGULATION_OF_CILIUM_MOVEMENT	16	0.34	1.11	0.325	0.767	1	2315	tags=38%, list=12%, signal=43%		72	GOBP_REGULATION_OF_CENTROSOME_DUPLICATION	43	-0.52	-1.47	0.008	0.55	1	4865	tags=58%, list=25%, signal=78%
	73	GOBP_LOCOMOTOR_RHYTHM	21	0.32	1.1	0.337	0.772	1	1572	tags=29%, list=8%, signal=31%		73	GOBP_NUCLEOTIDE_SUGAR_METABOLIC_PROCESS	34	-0.53	-1.47	0.018	0.552	1	6960	tags=65%, list=36%, signal=101%
	74	GOBP_REGULATION_OF_CARDIAC_MUSCLE_CELL_DIFFERENTIATION	19	0.31	1.1	0.313	0.765	1	1345	tags=26%, list=7%, signal=28%		74	GOBP_ANTIGEN_PROCESSING_AND_PRESENTATION_OF_PEPTIDE_ANTIGEN_VIA_MHC_CLASS_I	26	-0.56	-1.47	0.018	0.546	1	3359	tags=38%, list=18%, signal=47%
	75	GOBP_REGULATION_OF_COMPLEMENT_ACTIVATION	20	0.3	1.1	0.262	0.772	1	1038	tags=25%, list=5%, signal=26%		75	GOBP_ENDODERMAL_CELL_FATE_COMMITMENT	15	-0.62	-1.47	0.017	0.559	1	3448	tags=40%, list=18%, signal=49%
	76	GOBP_PROTEIN_LOCALIZATION_TO_MICROTUBULE	20	0.3	1.1	0.287	0.769	1	1103	tags=25%, list=6%, signal=26%		76	GOBP_NUCLEOTIDE_SUGAR_BIOSYNTHETIC_PROCESS	17	-0.6	-1.47	0.024	0.553	1	6626	tags=82%, list=35%, signal=126%
	77	GOBP_RETINA_MORPHOGENESIS_IN_CAMERA_TYPE_EYE	81	0.24	1.09	0.125	0.762	1	1731	tags=27%, list=9%, signal=30%		77	GOBP_RESPONSE_TO_DEXAMETHASONE	31	-0.54	-1.47	0.015	0.554	1	7134	tags=52%, list=37%, signal=82%
	78	GOBP_SUBPALLIUM_DEVELOPMENT	24	0.29	1.09	0.268	0.766	1	1257	tags=21%, list=7%, signal=22%		78	GOBP_PLATELET_DENSE_GRANULE_ORGANIZATION	21	-0.58	-1.47	0.029	0.549	1	2976	tags=43%, list=16%, signal=51%
	79	GOBP_CELL_PROLIFERATION_IN_HINDBRAIN	19	0.31	1.09	0.309	0.757	1	497	tags=21%, list=3%, signal=22%		79	GOBP_PHOSPHATIDYLCHOLINE_BIOSYNTHETIC_PROCESS	21	-0.58	-1.46	0.022	0.55	1	6093	tags=71%, list=32%, signal=105%
	80	GOBP_EYE_PHOTORECEPTOR_CELL_DEVELOPMENT	44	0.26	1.09	0.324	0.752	1	1731	tags=30%, list=9%, signal=32%		80	GOBP_ACTIVATION_OF_ADENYLATE_CYCLASE_ACTIVITY	21	-0.57	-1.46	0.014	0.566	1	5150	tags=52%, list=27%, signal=72%
	81	GOBP_BIOLOGICAL_PHASE	49	0.26	1.08	0.278	0.768	1	1964	tags=29%, list=10%, signal=32%		81	GOBP_POSITIVE_REGULATION_OF_ADENYLATE_CYCLASE_ACTIVITY	31	-0.54	-1.46	0.021	0.559	1	5605	tags=55%, list=29%, signal=77%
	82	GOBP_HIPPOCAMPUS_DEVELOPMENT	82	0.22	1.08	0.111	0.772	1	686	tags=13%, list=4%, signal=14%		82	GOBP_BRANCHING_INVOLVED_IN_BLOOD_VESSEL_MORPHOGENESIS	45	-0.51	-1.46	0.007	0.554	1	6274	tags=58%, list=33%, signal=86%
	83	GOBP_NEGATIVE_REGULATION_OF_VIRAL_LIFE_CYCLE	30	0.27	1.07	0.314	0.806	1	2112	tags=33%, list=11%, signal=37%		83	GOBP_CARDIAC_NEURAL_CREST_CELL_DEVELOPMENT_INVOLVED_IN_OUTFLOW_TRACT_MORPHOGENESIS	15	-0.61	-1.46	0.025	0.551	1	4947	tags=60%, list=26%, signal=81%
	84	GOBP_POSITIVE_REGULATION_OF_T_CELL_APOPTOTIC_PROCESS	16	0.32	1.05	0.378	0.855	1	1725	tags=31%, list=9%, signal=34%		84	GOBP_REGULATION_OF_FEEDING_BEHAVIOR	40	-0.52	-1.46	0.01	0.546	1	5425	tags=43%, list=28%, signal=59%
	85	GOBP_POSITIVE_REGULATION_OF_INTERLEUKIN_12_PRODUCTION	45	0.25	1.05	0.28	0.858	1	1166	tags=20%, list=6%, signal=21%		85	GOBP_NEGATIVE_REGULATION_OF_ORGANELLE_ASSEMBLY	45	-0.52	-1.46	0.01	0.543	1	5146	tags=51%, list=27%, signal=70%
	86	GOBP_CELL_PROLIFERATION_INVOLVED_IN_KIDNEY_DEVELOPMENT	22	0.3	1.05	0.293	0.855	1	280	tags=14%, list=1%, signal=14%		86	GOBP_CARDIAC_CONDUCTION	65	-0.49	-1.46	0.005	0.548	1	6800	tags=54%, list=35%, signal=83%
	87	GOBP_LIPOPOLYSACCHARIDE_MEDIATED_SIGNALING_PATHWAY	52	0.24	1.04	0.36	0.85	1	1662	tags=27%, list=9%, signal=29%		87	GOBP_REGULATION_OF_GLYCOGEN_METABOLIC_PROCESS	39	-0.52	-1.46	0.02	0.545	1	6111	tags=56%, list=32%, signal=83%
	88	GOBP_DISRUPTION_OF_ANATOMICAL_STRUCTURE_IN_ANOTHER_ORGANISM	90	0.22	1.04	0.2	0.85	1	1849	tags=21%, list=10%, signal=23%		88	GOBP_NEGATIVE_REGULATION_OF_VASCULAR_PERMEABILITY	18	-0.59	-1.46	0.033	0.544	1	5205	tags=67%, list=27%, signal=91%
	89	GOBP_REGULATION_OF_MYOBLAST_DIFFERENTIATION	83	0.2	1.04	0.333	0.853	1	1430	tags=18%, list=7%, signal=19%		89	GOBP_VASCULOGENESIS	98	-0.48	-1.46	0	0.544	1	7071	tags=61%, list=37%, signal=96%
	90	GOBP_POSITIVE_REGULATION_OF_PHOSPHOPROTEIN_PHOSPHATASE_ACTIVITY	17	0.31	1.04	0.37	0.846	1	888	tags=18%, list=5%, signal=18%		90	GOBP_MRNA_TRANSCRIPTION	50	-0.5	-1.46	0.012	0.54	1	6179	tags=56%, list=32%, signal=82%
	91	GOBP_REGULATION_OF_HAIR_FOLLICLE_DEVELOPMENT	20	0.3	1.04	0.376	0.839	1	1757	tags=40%, list=9%, signal=44%		91	GOBP_PURINERGIC_NUCLEOTIDE_RECEPTOR_SIGNALING_PATHWAY	15	-0.61	-1.45	0.034	0.537	1	1969	tags=40%, list=10%, signal=45%
	92	GOBP_DORSAL_SPINAL_CORD_DEVELOPMENT	20	0.29	1.04	0.341	0.83	1	841	tags=20%, list=4%, signal=21%		92	GOBP_TYPE_II_INTERFERON_MEDIATED_SIGNALING_PATHWAY	22	-0.57	-1.45	0.018	0.54	1	2818	tags=36%, list=15%, signal=43%
	93	GOBP_HYDROGEN_PEROXIDE_BIOSYNTHETIC_PROCESS	19	0.3	1.04	0.417	0.824	1	1607	tags=26%, list=8%, signal=29%		93	GOBP_RESPONSE_TO_DOPAMINE	55	-0.5	-1.45	0.004	0.55	1	4190	tags=36%, list=22%, signal=46%
	94	GOBP_KILLING_OF_CELLS_OF_ANOTHER_ORGANISM	82	0.22	1.03	0.333	0.851	1	1430	tags=17%, list=7%, signal=18%		94	GOBP_CELLULAR_RESPONSE_TO_RETINOIC_ACID	45	-0.51	-1.45	0.007	0.55	1	4565	tags=44%, list=24%, signal=58%
	95	GOBP_SECONDARY_METABOLIC_PROCESS	55	0.24	1.02	0.462	0.855	1	2170	tags=29%, list=11%, signal=33%		95	GOBP_ARTERY_DEVELOPMENT	118	-0.47	-1.45	0.001	0.549	1	6111	tags=50%, list=32%, signal=73%
	96	GOBP_CELLULAR_RESPONSE_TO_CADMIUM_ION	28	0.28	1.02	0.377	0.849	1	1120	tags=18%, list=6%, signal=19%		96	GOBP_REGULATION_OF_PROTEIN_LOCALIZATION_TO_ENDOSOME	15	-0.6	-1.45	0.031	0.548	1	3360	tags=60%, list=18%, signal=73%
	97	GOBP_NEGATIVE_REGULATION_OF_DNA_RECOMBINATION	49	0.24	1.02	0.464	0.841	1	1869	tags=22%, list=10%, signal=25%		97	GOBP_VENOUS_BLOOD_VESSEL_DEVELOPMENT	19	-0.58	-1.45	0.042	0.559	1	4286	tags=58%, list=22%, signal=74%
	98	GOBP_NEGATIVE_REGULATION_OF_STEM_CELL_POPULATION_MAINTENANCE	25	0.28	1.02	0.419	0.835	1	1041	tags=20%, list=5%, signal=21%		98	GOBP_POSITIVE_REGULATION_OF_PROTEIN_POLYUBIQUITINATION	19	-0.58	-1.44	0.022	0.569	1	2723	tags=37%, list=14%, signal=43%
	99	GOBP_DIENCEPHALON_DEVELOPMENT	75	0.22	1.01	0.571	0.861	1	1212	tags=16%, list=6%, signal=17%		99	GOBP_REGULATION_OF_INCLUSION_BODY_ASSEMBLY	18	-0.58	-1.44	0.024	0.567	1	5672	tags=61%, list=30%, signal=87%
	100	GOBP_ANTIMICROBIAL_HUMORAL_IMMUNE_RESPONSE_MEDIATED_BY_ANTIMICROBIAL_PEPTIDE	83	0.22	1.01	0.571	0.87	1	1868	tags=20%, list=10%, signal=23%		100	GOBP_MYELIN_ASSEMBLY	26	-0.55	-1.44	0.027	0.563	1	3854	tags=42%, list=20%, signal=53%
	101	GOBP_NOSE_DEVELOPMENT	16	0.31	1	0.438	0.877	1	653	tags=19%, list=3%, signal=19%		101	GOBP_MORPHOGENESIS_OF_AN_ENDOTHELIUM	19	-0.58	-1.44	0.033	0.559	1	5105	tags=53%, list=27%, signal=72%
	102	GOBP_RESPONSE_TO_CADMIUM_ION	40	0.23	1	0.413	0.875	1	1151	tags=18%, list=6%, signal=19%		102	GOBP_RESPONSE_TO_MURAMYL_DIPEPTIDE	20	-0.57	-1.44	0.036	0.573	1	2958	tags=50%, list=15%, signal=59%
	103	GOBP_REGULATION_OF_DENDRITIC_SPINE_MAINTENANCE	16	0.29	1	0.413	0.881	1	2794	tags=50%, list=15%, signal=58%		103	GOBP_REGULATION_OF_ODONTOGENESIS	22	-0.56	-1.44	0.038	0.57	1	5103	tags=55%, list=27%, signal=74%
	104	GOBP_ANTIGEN_PROCESSING_AND_PRESENTATION_OF_EXOGENOUS_PEPTIDE_ANTIGEN_VIA_MHC_CLASS_II	19	0.29	0.99	0.451	0.895	1	2711	tags=53%, list=14%, signal=61%		104	GOBP_CARDIAC_NEURAL_CREST_CELL_DIFFERENTIATION_INVOLVED_IN_HEART_DEVELOPMENT	19	-0.58	-1.44	0.029	0.566	1	5298	tags=58%, list=28%, signal=80%
	105	GOBP_REGULATION_OF_IMMATURE_T_CELL_PROLIFERATION	17	0.3	0.99	0.413	0.9	1	699	tags=18%, list=4%, signal=18%		105	GOBP_CARDIAC_CONDUCTION_SYSTEM_DEVELOPMENT	20	-0.57	-1.44	0.031	0.561	1	4612	tags=45%, list=24%, signal=59%
	106	GOBP_REGULATION_OF_CILIUM_BEAT_FREQUENCY	17	0.28	0.99	0.468	0.897	1	1175	tags=18%, list=6%, signal=19%		106	GOBP_CORONARY_VASCULATURE_MORPHOGENESIS	32	-0.53	-1.43	0.017	0.585	1	5407	tags=56%, list=28%, signal=78%
	107	GOBP_POSITIVE_REGULATION_OF_LYMPHOCYTE_APOPTOTIC_PROCESS	21	0.27	0.98	0.494	0.899	1	797	tags=19%, list=4%, signal=20%		107	GOBP_PTERIDINE_CONTAINING_COMPOUND_METABOLIC_PROCESS	28	-0.54	-1.43	0.025	0.593	1	3564	tags=43%, list=19%, signal=53%
	108	GOBP_IMMATURE_B_CELL_DIFFERENTIATION	20	0.27	0.98	0.5	0.896	1	781	tags=15%, list=4%, signal=16%		108	GOBP_NEGATIVE_REGULATION_OF_CIRCADIAN_RHYTHM	15	-0.59	-1.43	0.047	0.589	1	1925	tags=33%, list=10%, signal=37%
	109	GOBP_INTRACELLULAR_SODIUM_ION_HOMEOSTASIS	27	0.26	0.98	0.474	0.915	1	962	tags=15%, list=5%, signal=16%		109	GOBP_BLOOD_VESSEL_ENDOTHELIAL_CELL_PROLIFERATION_INVOLVED_IN_SPROUTING_ANGIOGENESIS	23	-0.55	-1.43	0.036	0.589	1	5105	tags=57%, list=27%, signal=77%
	110	GOBP_POSITIVE_REGULATION_OF_CHROMOSOME_SEGREGATION	29	0.25	0.96	0.481	0.956	1	1074	tags=21%, list=6%, signal=22%		110	GOBP_ENDOTHELIAL_CELL_DEVELOPMENT	70	-0.48	-1.43	0.005	0.585	1	5103	tags=51%, list=27%, signal=70%
	111	GOBP_CEREBELLAR_CORTEX_FORMATION	33	0.25	0.96	0.551	0.956	1	684	tags=18%, list=4%, signal=19%		111	GOBP_DOPAMINE_RECEPTOR_SIGNALING_PATHWAY	39	-0.51	-1.43	0.016	0.595	1	4190	tags=44%, list=22%, signal=56%
	112	GOBP_REGULATION_OF_PLATELET_AGGREGATION	23	0.26	0.96	0.544	0.949	1	890	tags=17%, list=5%, signal=18%		112	GOBP_BONE_CELL_DEVELOPMENT	18	-0.58	-1.43	0.032	0.594	1	6622	tags=56%, list=35%, signal=85%
	113	GOBP_REGULATION_OF_CELL_PROLIFERATION_INVOLVED_IN_KIDNEY_DEVELOPMENT	16	0.29	0.96	0.482	0.948	1	82	tags=13%, list=0%, signal=13%		113	GOBP_POSITIVE_REGULATION_OF_LEUKOCYTE_TETHERING_OR_ROLLING	15	-0.6	-1.43	0.038	0.605	1	1505	tags=33%, list=8%, signal=36%
	114	GOBP_POSITIVE_REGULATION_OF_MYOBLAST_DIFFERENTIATION	48	0.22	0.96	0.56	0.944	1	1668	tags=19%, list=9%, signal=20%		114	GOBP_REGULATION_OF_RESPONSE_TO_CYTOKINE_STIMULUS	143	-0.46	-1.43	0	0.603	1	5368	tags=45%, list=28%, signal=62%
	115	GOBP_REGULATION_OF_VESICLE_FUSION	32	0.23	0.96	0.566	0.936	1	1694	tags=19%, list=9%, signal=21%		115	GOBP_CELL_CELL_JUNCTION_MAINTENANCE	22	-0.56	-1.43	0.035	0.599	1	3467	tags=41%, list=18%, signal=50%
	116	GOBP_POSITIVE_REGULATION_OF_COLLAGEN_METABOLIC_PROCESS	40	0.23	0.95	0.682	0.944	1	190	tags=10%, list=1%, signal=10%		116	GOBP_DIOL_METABOLIC_PROCESS	29	-0.53	-1.42	0.035	0.595	1	4690	tags=59%, list=24%, signal=77%
	117	GOBP_NEUTROPHIL_CHEMOTAXIS	97	0.2	0.95	0.75	0.939	1	1849	tags=23%, list=10%, signal=25%		117	GOBP_ENERGY_RESERVE_METABOLIC_PROCESS	92	-0.46	-1.42	0.001	0.6	1	7224	tags=59%, list=38%, signal=94%
	118	GOBP_PLATELET_AGGREGATION	57	0.22	0.95	0.583	0.932	1	1401	tags=19%, list=7%, signal=21%		118	GOBP_REGULATION_OF_INTERLEUKIN_4_PRODUCTION	37	-0.52	-1.42	0.028	0.595	1	2027	tags=30%, list=11%, signal=33%
	119	GOBP_REGULATION_OF_CALCIUM_MEDIATED_SIGNALING	87	0.21	0.95	0.667	0.925	1	1918	tags=25%, list=10%, signal=28%		119	GOBP_ARTERY_MORPHOGENESIS	81	-0.48	-1.42	0.002	0.599	1	5914	tags=52%, list=31%, signal=75%
	120	GOBP_MINERALOCORTICOID_METABOLIC_PROCESS	16	0.29	0.95	0.535	0.929	1	280	tags=13%, list=1%, signal=13%		120	GOBP_RESPONSE_TO_AUDITORY_STIMULUS	28	-0.53	-1.42	0.027	0.596	1	6347	tags=54%, list=33%, signal=80%
	121	GOBP_POSITIVE_REGULATION_OF_RECEPTOR_SIGNALING_PATHWAY_VIA_STAT	68	0.21	0.94	0.75	0.934	1	913	tags=10%, list=5%, signal=11%		121	GOBP_LYMPH_VESSEL_MORPHOGENESIS	24	-0.55	-1.42	0.02	0.593	1	3039	tags=46%, list=16%, signal=54%
	122	GOBP_LENS_FIBER_CELL_DIFFERENTIATION	36	0.24	0.94	0.563	0.932	1	114	tags=8%, list=1%, signal=8%		122	GOBP_REGULATION_OF_SPROUTING_ANGIOGENESIS	42	-0.5	-1.42	0.02	0.592	1	5303	tags=48%, list=28%, signal=66%
	123	GOBP_KERATINOCYTE_MIGRATION	19	0.28	0.93	0.544	0.95	1	1687	tags=37%, list=9%, signal=40%		123	GOBP_RENAL_FILTRATION	30	-0.53	-1.42	0.032	0.606	1	3177	tags=40%, list=17%, signal=48%
	124	GOBP_REGULATION_OF_CALCINEURIN_MEDIATED_SIGNALING	41	0.23	0.93	0.606	0.948	1	1918	tags=29%, list=10%, signal=32%		124	GOBP_TRNA_PROCESSING	120	-0.46	-1.42	0.001	0.611	1	7556	tags=60%, list=39%, signal=98%
	125	GOBP_RENAL_VESICLE_DEVELOPMENT	19	0.26	0.93	0.546	0.944	1	1146	tags=21%, list=6%, signal=22%		125	GOBP_REGULATION_OF_AUTOPHAGY_OF_MITOCHONDRION	31	-0.53	-1.42	0.02	0.607	1	5989	tags=52%, list=31%, signal=75%
	126	GOBP_NEGATIVE_REGULATION_OF_CALCINEURIN_MEDIATED_SIGNALING	15	0.28	0.93	0.628	0.948	1	1781	tags=33%, list=9%, signal=37%		126	GOBP_NEGATIVE_REGULATION_OF_MYELOID_CELL_APOPTOTIC_PROCESS	24	-0.55	-1.42	0.035	0.605	1	3323	tags=38%, list=17%, signal=45%
	127	GOBP_REGULATION_OF_SECONDARY_METABOLIC_PROCESS	16	0.29	0.92	0.566	0.953	1	499	tags=13%, list=3%, signal=13%		127	GOBP_LYMPH_VESSEL_DEVELOPMENT	32	-0.53	-1.42	0.018	0.602	1	3039	tags=41%, list=16%, signal=48%
	128	GOBP_EXTRACELLULAR_TRANSPORT	48	0.22	0.92	0.545	0.962	1	351	tags=10%, list=2%, signal=11%		128	GOBP_LOW_DENSITY_LIPOPROTEIN_PARTICLE_CLEARANCE	24	-0.55	-1.41	0.031	0.603	1	5793	tags=58%, list=30%, signal=83%
	129	GOBP_SEMINIFEROUS_TUBULE_DEVELOPMENT	21	0.26	0.92	0.622	0.961	1	1751	tags=29%, list=9%, signal=31%		129	GOBP_INTRACELLULAR_STEROL_TRANSPORT	34	-0.52	-1.41	0.028	0.599	1	5848	tags=59%, list=30%, signal=84%
	130	GOBP_COLLATERAL_SPROUTING	33	0.23	0.91	0.633	0.96	1	648	tags=12%, list=3%, signal=13%		130	GOBP_RESPONSE_TO_IRON_ION	21	-0.55	-1.41	0.038	0.605	1	5939	tags=52%, list=31%, signal=76%
	131	GOBP_GLIAL_CELL_ACTIVATION	56	0.2	0.91	0.704	0.962	1	1608	tags=20%, list=8%, signal=21%		131	GOBP_POSITIVE_REGULATION_OF_FATTY_ACID_METABOLIC_PROCESS	49	-0.49	-1.41	0.034	0.613	1	2999	tags=35%, list=16%, signal=41%
	132	GOBP_REGULATION_OF_SYNAPTIC_VESICLE_RECYCLING	37	0.23	0.91	0.684	0.955	1	886	tags=14%, list=5%, signal=14%		132	GOBP_NEGATIVE_REGULATION_OF_MITOCHONDRION_ORGANIZATION	53	-0.49	-1.41	0.011	0.61	1	5146	tags=49%, list=27%, signal=67%
	133	GOBP_MELANIN_METABOLIC_PROCESS	27	0.26	0.91	0.611	0.953	1	2170	tags=30%, list=11%, signal=33%		133	GOBP_MEMBRANE_DEPOLARIZATION_DURING_CARDIAC_MUSCLE_CELL_ACTION_POTENTIAL	17	-0.58	-1.41	0.047	0.608	1	2530	tags=35%, list=13%, signal=41%
	134	GOBP_NEGATIVE_REGULATION_OF_INTERLEUKIN_6_PRODUCTION	51	0.2	0.91	0.593	0.946	1	1626	tags=25%, list=8%, signal=28%		134	GOBP_REGULATION_OF_MEMBRANE_DEPOLARIZATION	53	-0.49	-1.41	0.014	0.605	1	2530	tags=26%, list=13%, signal=30%
	135	GOBP_PIGMENT_CELL_DIFFERENTIATION	39	0.22	0.91	0.738	0.941	1	1623	tags=26%, list=8%, signal=28%		135	GOBP_GLYCOLIPID_CATABOLIC_PROCESS	16	-0.58	-1.41	0.046	0.605	1	6189	tags=63%, list=32%, signal=92%
	136	GOBP_MULTICELLULAR_ORGANISMAL_LEVEL_WATER_HOMEOSTASIS	27	0.23	0.9	0.708	0.944	1	782	tags=15%, list=4%, signal=15%		136	GOBP_REGULATION_OF_MACROAUTOPHAGY	116	-0.46	-1.41	0.001	0.602	1	5167	tags=47%, list=27%, signal=65%
	137	GOBP_SERTOLI_CELL_DEVELOPMENT	22	0.25	0.9	0.616	0.943	1	1751	tags=27%, list=9%, signal=30%		137	GOBP_NEGATIVE_REGULATION_OF_DEFENSE_RESPONSE_TO_VIRUS	48	-0.5	-1.41	0.017	0.604	1	5143	tags=44%, list=27%, signal=60%
	138	GOBP_EXTRACELLULAR_MATRIX_CONSTITUENT_SECRETION	15	0.28	0.9	0.568	0.951	1	280	tags=13%, list=1%, signal=14%		138	GOBP_NEGATIVE_REGULATION_OF_VIRAL_INDUCED_CYTOPLASMIC_PATTERN_RECOGNITION_RECEPTOR_SIGNALING_PATHWAY	35	-0.51	-1.41	0.032	0.601	1	5143	tags=46%, list=27%, signal=62%
	139	GOBP_POSITIVE_REGULATION_OF_OSTEOBLAST_PROLIFERATION	15	0.28	0.9	0.563	0.949	1	1340	tags=20%, list=7%, signal=21%		139	GOBP_NEGATIVE_REGULATION_OF_ENDOTHELIAL_CELL_PROLIFERATION	46	-0.5	-1.41	0.018	0.606	1	6344	tags=59%, list=33%, signal=87%
	140	GOBP_REGULATION_OF_CILIUM_DEPENDENT_CELL_MOTILITY	31	0.23	0.9	0.719	0.944	1	1875	tags=26%, list=10%, signal=29%		140	GOBP_VASCULAR_ENDOTHELIAL_GROWTH_FACTOR_SIGNALING_PATHWAY	42	-0.5	-1.41	0.03	0.603	1	1285	tags=24%, list=7%, signal=25%
	141	GOBP_ECTOPIC_GERM_CELL_PROGRAMMED_CELL_DEATH	21	0.26	0.89	0.64	0.944	1	1809	tags=24%, list=9%, signal=26%		141	GOBP_SPROUTING_ANGIOGENESIS	129	-0.45	-1.41	0	0.6	1	5303	tags=45%, list=28%, signal=62%
	142	GOBP_RESPONSE_TO_FUNGUS	63	0.2	0.89	0.7	0.945	1	1868	tags=21%, list=10%, signal=23%		142	GOBP_POSITIVE_REGULATION_OF_MESENCHYMAL_CELL_PROLIFERATION	32	-0.52	-1.41	0.027	0.598	1	3881	tags=47%, list=20%, signal=59%
	143	GOBP_REGULATION_OF_T_HELPER_17_TYPE_IMMUNE_RESPONSE	32	0.23	0.89	0.625	0.945	1	1171	tags=19%, list=6%, signal=20%		143	GOBP_CARDIAC_MUSCLE_CELL_CONTRACTION	70	-0.47	-1.41	0.007	0.598	1	8066	tags=64%, list=42%, signal=111%
	144	GOBP_NEGATIVE_REGULATION_OF_DOUBLE_STRAND_BREAK_REPAIR_VIA_HOMOLOGOUS_RECOMBINATION	22	0.24	0.88	0.689	0.956	1	1625	tags=23%, list=8%, signal=25%		144	GOBP_CD8_POSITIVE_ALPHA_BETA_T_CELL_ACTIVATION	36	-0.51	-1.41	0.027	0.595	1	1079	tags=25%, list=6%, signal=26%
	145	GOBP_POSITIVE_REGULATION_OF_LYMPHOCYTE_CHEMOTAXIS	18	0.26	0.88	0.654	0.954	1	1514	tags=28%, list=8%, signal=30%		145	GOBP_CELLULAR_RESPONSE_TO_DEXAMETHASONE_STIMULUS	26	-0.53	-1.41	0.034	0.591	1	7134	tags=46%, list=37%, signal=73%
	146	GOBP_IMMATURE_T_CELL_PROLIFERATION	19	0.25	0.88	0.63	0.953	1	699	tags=16%, list=4%, signal=16%		146	GOBP_MEMBRANE_RAFT_ORGANIZATION	22	-0.56	-1.41	0.027	0.592	1	2991	tags=41%, list=16%, signal=48%
	147	GOBP_REGULATION_OF_ATTACHMENT_OF_SPINDLE_MICROTUBULES_TO_KINETOCHORE	20	0.26	0.88	0.67	0.948	1	1074	tags=20%, list=6%, signal=21%		147	GOBP_CALMODULIN_DEPENDENT_KINASE_SIGNALING_PATHWAY	15	-0.59	-1.4	0.048	0.589	1	5727	tags=67%, list=30%, signal=95%
	148	GOBP_TRANSCYTOSIS	22	0.25	0.87	0.687	0.966	1	1152	tags=18%, list=6%, signal=19%		148	GOBP_REGULATION_OF_PHOSPHOLIPID_TRANSPORT	15	-0.59	-1.4	0.042	0.595	1	4576	tags=53%, list=24%, signal=70%
	149	GOBP_POSITIVE_REGULATION_OF_MONOCYTE_CHEMOTAXIS	25	0.23	0.86	0.738	0.969	1	186	tags=8%, list=1%, signal=8%		149	GOBP_MELANOSOME_ASSEMBLY	19	-0.56	-1.4	0.052	0.591	1	2976	tags=42%, list=16%, signal=50%
	150	GOBP_POSITIVE_REGULATION_OF_CELLULAR_RESPONSE_TO_TRANSFORMING_GROWTH_FACTOR_BETA_STIMULUS	30	0.22	0.86	0.754	0.971	1	288	tags=10%, list=2%, signal=10%		150	GOBP_REGULATION_OF_ADENYLATE_CYCLASE_ACTIVITY	47	-0.49	-1.4	0.024	0.591	1	5150	tags=47%, list=27%, signal=64%
	151	GOBP_REGULATION_OF_HYDROGEN_PEROXIDE_METABOLIC_PROCESS	18	0.25	0.86	0.696	0.971	1	161	tags=11%, list=1%, signal=11%		151	GOBP_CERAMIDE_CATABOLIC_PROCESS	20	-0.56	-1.4	0.031	0.587	1	5069	tags=55%, list=26%, signal=75%
	152	GOBP_INTERNEURON_MIGRATION	16	0.26	0.86	0.628	0.967	1	537	tags=13%, list=3%, signal=13%		152	GOBP_CELL_MIGRATION_INVOLVED_IN_GASTRULATION	17	-0.57	-1.4	0.039	0.59	1	5999	tags=71%, list=31%, signal=103%
	153	GOBP_REGULATION_OF_PIGMENTATION	16	0.26	0.85	0.721	0.968	1	449	tags=13%, list=2%, signal=13%		153	GOBP_REGULATION_OF_TUMOR_NECROSIS_FACTOR_MEDIATED_SIGNALING_PATHWAY	36	-0.51	-1.4	0.027	0.589	1	5675	tags=56%, list=30%, signal=79%
	154	GOBP_EPOXYGENASE_P450_PATHWAY	21	0.24	0.85	0.733	0.975	1	1766	tags=19%, list=9%, signal=21%		154	GOBP_REGULATION_OF_LIPOPROTEIN_PARTICLE_CLEARANCE	21	-0.55	-1.4	0.046	0.598	1	6907	tags=71%, list=36%, signal=112%
	155	GOBP_TYROSINE_METABOLIC_PROCESS	15	0.27	0.85	0.718	0.974	1	999	tags=20%, list=5%, signal=21%		155	GOBP_TRNA_METABOLIC_PROCESS	175	-0.45	-1.4	0.001	0.596	1	7783	tags=59%, list=41%, signal=99%
	156	GOBP_ECTODERMAL_PLACODE_DEVELOPMENT	18	0.26	0.85	0.672	0.969	1	653	tags=17%, list=3%, signal=17%		156	GOBP_PARAXIAL_MESODERM_DEVELOPMENT	24	-0.54	-1.4	0.038	0.592	1	2394	tags=38%, list=12%, signal=43%
	157	GOBP_POSITIVE_REGULATION_OF_GRANULOCYTE_CHEMOTAXIS	29	0.22	0.84	0.846	0.969	1	1834	tags=24%, list=10%, signal=27%		157	GOBP_NEGATIVE_REGULATION_OF_FAT_CELL_DIFFERENTIATION	59	-0.48	-1.4	0.009	0.589	1	6155	tags=54%, list=32%, signal=80%
	158	GOBP_REGULATION_OF_MONOATOMIC_ANION_TRANSMEMBRANE_TRANSPORT	16	0.26	0.84	0.712	0.969	1	1572	tags=25%, list=8%, signal=27%		158	GOBP_STEROL_METABOLIC_PROCESS	144	-0.45	-1.4	0.001	0.602	1	7087	tags=55%, list=37%, signal=86%
	159	GOBP_CALCINEURIN_MEDIATED_SIGNALING	50	0.19	0.84	0.846	0.964	1	1918	tags=26%, list=10%, signal=29%		159	GOBP_RENAL_TUBULAR_SECRETION	17	-0.57	-1.4	0.046	0.6	1	800	tags=24%, list=4%, signal=25%
	160	GOBP_CEREBELLAR_CORTEX_MORPHOGENESIS	46	0.2	0.84	0.861	0.959	1	684	tags=15%, list=4%, signal=16%		160	GOBP_PLASMA_MEMBRANE_ORGANIZATION	161	-0.45	-1.4	0	0.598	1	2620	tags=27%, list=14%, signal=31%
	161	GOBP_PHOSPHATE_ION_HOMEOSTASIS	23	0.24	0.83	0.696	0.964	1	1485	tags=22%, list=8%, signal=24%		161	GOBP_OUTFLOW_TRACT_SEPTUM_MORPHOGENESIS	28	-0.52	-1.4	0.048	0.598	1	7490	tags=61%, list=39%, signal=99%
	162	GOBP_PHOSPHATIDYLCHOLINE_CATABOLIC_PROCESS	15	0.26	0.83	0.731	0.968	1	1389	tags=20%, list=7%, signal=22%		162	GOBP_REGULATION_OF_ARP2_3_COMPLEX_MEDIATED_ACTIN_NUCLEATION	29	-0.52	-1.39	0.038	0.598	1	7214	tags=66%, list=38%, signal=105%
	163	GOBP_ASTROCYTE_ACTIVATION	20	0.23	0.83	0.733	0.963	1	1203	tags=15%, list=6%, signal=16%		163	GOBP_DIOL_BIOSYNTHETIC_PROCESS	21	-0.55	-1.39	0.042	0.597	1	4690	tags=62%, list=24%, signal=82%
	164	GOBP_SUCKLING_BEHAVIOR	17	0.25	0.83	0.763	0.958	1	857	tags=12%, list=4%, signal=12%		164	GOBP_MITOPHAGY	41	-0.5	-1.39	0.021	0.595	1	5313	tags=49%, list=28%, signal=67%
	165	GOBP_REGULATION_OF_HAIR_CYCLE	30	0.23	0.82	0.8	0.98	1	1757	tags=30%, list=9%, signal=33%		165	GOBP_NEGATIVE_REGULATION_OF_PROGRAMMED_NECROTIC_CELL_DEATH	18	-0.57	-1.39	0.048	0.599	1	4711	tags=56%, list=25%, signal=74%
	166	GOBP_POSITIVE_REGULATION_OF_CELL_CYCLE_CHECKPOINT	15	0.25	0.81	0.739	0.996	1	1074	tags=20%, list=6%, signal=21%		166	GOBP_NEGATIVE_REGULATION_OF_ENDOTHELIAL_CELL_APOPTOTIC_PROCESS	32	-0.51	-1.39	0.039	0.596	1	4152	tags=44%, list=22%, signal=56%
	167	GOBP_POSITIVE_REGULATION_OF_LEUKOCYTE_APOPTOTIC_PROCESS	32	0.21	0.81	0.826	0.991	1	1725	tags=22%, list=9%, signal=24%		167	GOBP_TRANSLATIONAL_ELONGATION	63	-0.48	-1.39	0.011	0.593	1	6475	tags=57%, list=34%, signal=86%
	168	GOBP_SYNAPTIC_VESICLE_MEMBRANE_ORGANIZATION	34	0.2	0.8	0.818	0.987	1	50	tags=6%, list=0%, signal=6%		168	GOBP_VENTRICULAR_CARDIAC_MUSCLE_CELL_MEMBRANE_REPOLARIZATION	24	-0.54	-1.39	0.054	0.594	1	7168	tags=67%, list=37%, signal=106%
	169	GOBP_EYELID_DEVELOPMENT_IN_CAMERA_TYPE_EYE	16	0.25	0.8	0.759	0.989	1	1663	tags=25%, list=9%, signal=27%		169	GOBP_OUTFLOW_TRACT_MORPHOGENESIS	88	-0.46	-1.39	0.006	0.591	1	5939	tags=49%, list=31%, signal=70%
	170	GOBP_GLUCOCORTICOID_BIOSYNTHETIC_PROCESS	17	0.24	0.8	0.727	0.989	1	280	tags=12%, list=1%, signal=12%		170	GOBP_REGULATION_OF_ENDOTHELIAL_CELL_DIFFERENTIATION	41	-0.49	-1.39	0.034	0.595	1	4731	tags=51%, list=25%, signal=68%
	171	GOBP_METANEPHRIC_NEPHRON_MORPHOGENESIS	22	0.22	0.79	0.763	0.988	1	1146	tags=18%, list=6%, signal=19%		171	GOBP_CORONARY_VASCULATURE_DEVELOPMENT	78	-0.46	-1.39	0.016	0.593	1	5407	tags=47%, list=28%, signal=66%
	172	GOBP_DETECTION_OF_MECHANICAL_STIMULUS_INVOLVED_IN_SENSORY_PERCEPTION_OF_PAIN	26	0.21	0.79	0.87	0.986	1	2573	tags=35%, list=13%, signal=40%		172	GOBP_POSITIVE_REGULATION_OF_BMP_SIGNALING_PATHWAY	40	-0.5	-1.39	0.031	0.59	1	7694	tags=70%, list=40%, signal=117%
	173	GOBP_WOUND_HEALING_SPREADING_OF_EPIDERMAL_CELLS	20	0.23	0.79	0.795	0.984	1	119	tags=10%, list=1%, signal=10%		173	GOBP_REGULATION_OF_BLOOD_VESSEL_ENDOTHELIAL_CELL_PROLIFERATION_INVOLVED_IN_SPROUTING_ANGIOGENESIS	17	-0.58	-1.39	0.051	0.591	1	3768	tags=47%, list=20%, signal=59%
	174	GOBP_SPERMATID_NUCLEUS_DIFFERENTIATION	29	0.21	0.79	0.873	0.988	1	816	tags=17%, list=4%, signal=18%		174	GOBP_RESPONSE_TO_INTERLEUKIN_4	33	-0.5	-1.39	0.043	0.592	1	6669	tags=55%, list=35%, signal=83%
	175	GOBP_NEUROMUSCULAR_SYNAPTIC_TRANSMISSION	33	0.22	0.78	0.863	0.986	1	1380	tags=15%, list=7%, signal=16%		175	GOBP_POSITIVE_REGULATION_OF_VASCULAR_ENDOTHELIAL_CELL_PROLIFERATION	20	-0.55	-1.39	0.055	0.598	1	5272	tags=60%, list=27%, signal=83%
	176	GOBP_CELLULAR_RESPONSE_TO_PH	24	0.21	0.78	0.864	0.992	1	396	tags=8%, list=2%, signal=8%		176	GOBP_MEMBRANE_REPOLARIZATION_DURING_ACTION_POTENTIAL	20	-0.55	-1.39	0.047	0.603	1	6852	tags=60%, list=36%, signal=93%
	177	GOBP_LUNG_CELL_DIFFERENTIATION	38	0.19	0.78	0.932	0.987	1	1058	tags=16%, list=6%, signal=17%		177	GOBP_SIGNALING_RECEPTOR_LIGAND_PRECURSOR_PROCESSING	32	-0.5	-1.39	0.042	0.606	1	4544	tags=47%, list=24%, signal=61%
	178	GOBP_REGULATION_OF_NMDA_RECEPTOR_ACTIVITY	28	0.2	0.77	0.855	0.985	1	1132	tags=14%, list=6%, signal=15%		178	GOBP_NEGATIVE_REGULATION_OF_FATTY_ACID_BIOSYNTHETIC_PROCESS	18	-0.56	-1.39	0.053	0.603	1	3781	tags=39%, list=20%, signal=48%
	179	GOBP_POSITIVE_REGULATION_OF_CHONDROCYTE_DIFFERENTIATION	22	0.22	0.77	0.828	0.983	1	1683	tags=18%, list=9%, signal=20%		179	GOBP_MITOTIC_G1_S_TRANSITION_CHECKPOINT_SIGNALING	25	-0.53	-1.39	0.043	0.6	1	7270	tags=68%, list=38%, signal=109%
	180	GOBP_RESPONSE_TO_ACIDIC_PH	22	0.23	0.77	0.838	0.982	1	1159	tags=14%, list=6%, signal=14%		180	GOBP_CGMP_MEDIATED_SIGNALING	36	-0.5	-1.38	0.036	0.608	1	4516	tags=39%, list=24%, signal=51%
	181	GOBP_CEREBELLAR_PURKINJE_CELL_LAYER_MORPHOGENESIS	25	0.21	0.77	0.839	0.977	1	497	tags=16%, list=3%, signal=16%		181	GOBP_POSITIVE_REGULATION_OF_CYCLASE_ACTIVITY	39	-0.5	-1.38	0.031	0.616	1	5605	tags=51%, list=29%, signal=72%
	182	GOBP_C21_STEROID_HORMONE_BIOSYNTHETIC_PROCESS	19	0.22	0.76	0.87	0.98	1	1471	tags=21%, list=8%, signal=23%		182	GOBP_POSITIVE_REGULATION_OF_NOTCH_SIGNALING_PATHWAY	44	-0.49	-1.38	0.024	0.613	1	2397	tags=32%, list=12%, signal=36%
	183	GOBP_NEGATIVE_REGULATION_OF_SYNAPSE_ORGANIZATION	18	0.22	0.76	0.901	0.982	1	1469	tags=22%, list=8%, signal=24%		183	GOBP_CARDIAC_MUSCLE_CELL_MEMBRANE_REPOLARIZATION	31	-0.51	-1.38	0.038	0.614	1	7168	tags=61%, list=37%, signal=98%
	184	GOBP_PROGRAMMED_CELL_DEATH_INVOLVED_IN_CELL_DEVELOPMENT	32	0.19	0.76	0.882	0.978	1	1809	tags=22%, list=9%, signal=24%		184	GOBP_INTESTINAL_ABSORPTION	41	-0.49	-1.38	0.039	0.612	1	3716	tags=37%, list=19%, signal=45%
	185	GOBP_HOMOTYPIC_CELL_CELL_ADHESION	85	0.16	0.75	1	0.975	1	1891	tags=19%, list=10%, signal=21%		185	GOBP_REGULATION_OF_INTEGRIN_MEDIATED_SIGNALING_PATHWAY	21	-0.54	-1.38	0.053	0.611	1	2620	tags=43%, list=14%, signal=50%
	186	GOBP_CALCIUM_ION_TRANSMEMBRANE_TRANSPORT_VIA_HIGH_VOLTAGE_GATED_CALCIUM_CHANNEL	16	0.23	0.75	0.88	0.973	1	14763	tags=100%, list=77%, signal=434%		186	GOBP_PLASMA_MEMBRANE_PHOSPHOLIPID_SCRAMBLING	21	-0.55	-1.38	0.047	0.612	1	2346	tags=38%, list=12%, signal=43%
	187	GOBP_REGULATION_OF_HOMOTYPIC_CELL_CELL_ADHESION	34	0.18	0.74	0.98	0.98	1	890	tags=12%, list=5%, signal=12%		187	GOBP_REGULATION_OF_ADIPOSE_TISSUE_DEVELOPMENT	19	-0.55	-1.38	0.065	0.614	1	2856	tags=26%, list=15%, signal=31%
	188	GOBP_HYALURONAN_BIOSYNTHETIC_PROCESS	15	0.23	0.74	0.849	0.979	1	1130	tags=20%, list=6%, signal=21%		188	GOBP_CYTOPLASMIC_TRANSLATIONAL_INITIATION	25	-0.53	-1.38	0.05	0.618	1	7820	tags=80%, list=41%, signal=135%
	189	GOBP_MESENCHYMAL_TO_EPITHELIAL_TRANSITION	18	0.22	0.73	0.908	0.981	1	1146	tags=17%, list=6%, signal=18%		189	GOBP_BLOOD_VESSEL_ENDOTHELIAL_CELL_MIGRATION	123	-0.45	-1.38	0.005	0.615	1	5261	tags=46%, list=27%, signal=62%
	190	GOBP_REGULATION_OF_KETONE_BIOSYNTHETIC_PROCESS	24	0.2	0.73	0.93	0.978	1	1715	tags=21%, list=9%, signal=23%		190	GOBP_HEART_TRABECULA_FORMATION	15	-0.58	-1.38	0.072	0.616	1	6801	tags=73%, list=35%, signal=114%
	191	GOBP_POSITIVE_REGULATION_OF_MITOTIC_SISTER_CHROMATID_SEPARATION	18	0.22	0.72	0.931	0.982	1	1074	tags=17%, list=6%, signal=18%		191	GOBP_SERINE_FAMILY_AMINO_ACID_METABOLIC_PROCESS	35	-0.5	-1.37	0.044	0.629	1	7369	tags=60%, list=38%, signal=97%
	192	GOBP_REGULATION_OF_DNA_METHYLATION_DEPENDENT_HETEROCHROMATIN_FORMATION	18	0.21	0.72	0.875	0.984	1	12595	tags=94%, list=66%, signal=275%		192	GOBP_GPI_ANCHOR_METABOLIC_PROCESS	34	-0.5	-1.37	0.043	0.629	1	5180	tags=50%, list=27%, signal=68%
	193	GOBP_POSITIVE_REGULATION_OF_MUSCLE_TISSUE_DEVELOPMENT	29	0.18	0.72	0.93	0.98	1	1668	tags=21%, list=9%, signal=23%		193	GOBP_VITAMIN_TRANSMEMBRANE_TRANSPORT	20	-0.55	-1.37	0.062	0.628	1	5914	tags=65%, list=31%, signal=94%
	194	GOBP_RETINAL_ROD_CELL_DIFFERENTIATION	22	0.2	0.71	0.92	0.979	1	1731	tags=27%, list=9%, signal=30%		194	GOBP_T_HELPER_1_CELL_DIFFERENTIATION	26	-0.53	-1.37	0.055	0.63	1	3222	tags=42%, list=17%, signal=51%
	195	GOBP_POSITIVE_REGULATION_OF_CHEMOKINE_C_X_C_MOTIF_LIGAND_2_PRODUCTION	15	0.22	0.71	0.896	0.979	1	1922	tags=27%, list=10%, signal=30%		195	GOBP_POSITIVE_REGULATION_OF_LYASE_ACTIVITY	40	-0.5	-1.37	0.029	0.628	1	5605	tags=48%, list=29%, signal=67%
	196	GOBP_AROMATIC_AMINO_ACID_METABOLIC_PROCESS	31	0.18	0.7	0.984	0.983	1	1543	tags=19%, list=8%, signal=21%		196	GOBP_INTRACELLULAR_LIPID_TRANSPORT	45	-0.49	-1.37	0.033	0.626	1	5848	tags=56%, list=30%, signal=80%
	197	GOBP_RESPONSE_TO_TESTOSTERONE	16	0.2	0.69	0.939	0.985	1	1763	tags=25%, list=9%, signal=28%		197	GOBP_REGULATION_OF_AUTOPHAGY_OF_MITOCHONDRION_IN_RESPONSE_TO_MITOCHONDRIAL_DEPOLARIZATION	16	-0.57	-1.37	0.056	0.624	1	5313	tags=56%, list=28%, signal=78%
	198	GOBP_METANEPHROS_MORPHOGENESIS	27	0.18	0.68	0.959	0.982	1	1146	tags=15%, list=6%, signal=16%		198	GOBP_INTRACELLULAR_MONOATOMIC_ANION_HOMEOSTASIS	16	-0.57	-1.37	0.064	0.627	1	1928	tags=31%, list=10%, signal=35%
	199	GOBP_POSITIVE_REGULATION_OF_NITRIC_OXIDE_METABOLIC_PROCESS	48	0.17	0.68	0.967	0.978	1	1093	tags=15%, list=6%, signal=15%		199	GOBP_PHOSPHATIDYLSERINE_METABOLIC_PROCESS	19	-0.55	-1.37	0.061	0.625	1	7430	tags=63%, list=39%, signal=103%
	200	GOBP_NEGATIVE_REGULATION_OF_HORMONE_METABOLIC_PROCESS	16	0.21	0.68	0.918	0.977	1	15097	tags=100%, list=79%, signal=470%		200	GOBP_MESENCHYMAL_CELL_PROLIFERATION	55	-0.47	-1.37	0.017	0.626	1	4240	tags=44%, list=22%, signal=56%
	201	GOBP_MHC_CLASS_II_BIOSYNTHETIC_PROCESS	17	0.21	0.66	0.908	0.984	1	1608	tags=24%, list=8%, signal=26%		201	GOBP_REGULATION_OF_DEFENSE_RESPONSE_TO_VIRUS	98	-0.45	-1.37	0.007	0.624	1	5176	tags=40%, list=27%, signal=54%
	202	GOBP_POSTSYNAPTIC_ACTIN_CYTOSKELETON_ORGANIZATION	23	0.18	0.63	0.973	0.99	1	1229	tags=13%, list=6%, signal=14%		202	GOBP_REGULATION_OF_CARDIAC_MUSCLE_CELL_MEMBRANE_REPOLARIZATION	26	-0.52	-1.37	0.055	0.621	1	7168	tags=65%, list=37%, signal=104%
	203	GOBP_NEGATIVE_REGULATION_OF_B_CELL_APOPTOTIC_PROCESS	21	0.16	0.6	1	0.996	1	1922	tags=14%, list=10%, signal=16%		203	GOBP_REGULATION_OF_NATURAL_KILLER_CELL_PROLIFERATION	17	-0.55	-1.37	0.065	0.624	1	2818	tags=35%, list=15%, signal=41%
	204	GOBP_REGULATION_OF_LONG_TERM_SYNAPTIC_DEPRESSION	18	0.17	0.59	0.99	0.992	1	1116	tags=11%, list=6%, signal=12%		204	GOBP_REGULATION_OF_LOW_DENSITY_LIPOPROTEIN_PARTICLE_CLEARANCE	15	-0.57	-1.37	0.073	0.622	1	6701	tags=67%, list=35%, signal=102%
	205	GOBP_HUMORAL_IMMUNE_RESPONSE	203	0.22	---	---	1	0	1868	tags=24%, list=10%, signal=26%		205	GOBP_REGULATION_OF_SODIUM_ION_TRANSMEMBRANE_TRANSPORTER_ACTIVITY	58	-0.47	-1.37	0.026	0.619	1	8064	tags=60%, list=42%, signal=104%
	206	GOBP_SPERM_MOTILITY	166	0.196878	---	---	1	0	1875	tags=22%, list=10%, signal=24%		206	GOBP_POSITIVE_REGULATION_OF_CELL_SUBSTRATE_JUNCTION_ORGANIZATION	35	-0.5	-1.37	0.04	0.617	1	5205	tags=46%, list=27%, signal=63%
												207	GOBP_PERIPHERAL_NERVOUS_SYSTEM_AXON_ENSHEATHMENT	32	-0.51	-1.37	0.059	0.615	1	6733	tags=56%, list=35%, signal=87%
												208	GOBP_NEGATIVE_REGULATION_OF_TUMOR_NECROSIS_FACTOR_MEDIATED_SIGNALING_PATHWAY	16	-0.57	-1.37	0.065	0.621	1	5368	tags=56%, list=28%, signal=78%
												209	GOBP_EMBRYONIC_HEART_TUBE_DEVELOPMENT	94	-0.45	-1.37	0.013	0.62	1	7350	tags=55%, list=38%, signal=89%
												210	GOBP_LIPOPROTEIN_CATABOLIC_PROCESS	17	-0.56	-1.37	0.076	0.617	1	4761	tags=59%, list=25%, signal=78%
												211	GOBP_GAP_JUNCTION_ASSEMBLY	17	-0.56	-1.37	0.081	0.618	1	3307	tags=35%, list=17%, signal=43%
												212	GOBP_NEGATIVE_REGULATION_OF_MACROPHAGE_ACTIVATION	15	-0.57	-1.37	0.067	0.615	1	3894	tags=47%, list=20%, signal=59%
												213	GOBP_NUCLEOSIDE_BISPHOSPHATE_BIOSYNTHETIC_PROCESS	39	-0.48	-1.37	0.043	0.616	1	7384	tags=64%, list=39%, signal=104%
												214	GOBP_TRABECULA_FORMATION	30	-0.51	-1.37	0.048	0.618	1	6801	tags=63%, list=35%, signal=98%
												215	GOBP_NEGATIVE_REGULATION_OF_ACUTE_INFLAMMATORY_RESPONSE	15	-0.58	-1.37	0.078	0.616	1	3387	tags=33%, list=18%, signal=40%
												216	GOBP_AMINE_BIOSYNTHETIC_PROCESS	41	-0.48	-1.36	0.034	0.616	1	6793	tags=51%, list=35%, signal=79%
												217	GOBP_REGULATION_OF_GLYCOGEN_BIOSYNTHETIC_PROCESS	31	-0.5	-1.36	0.052	0.614	1	4361	tags=45%, list=23%, signal=58%
												218	GOBP_INTERLEUKIN_4_PRODUCTION	45	-0.49	-1.36	0.034	0.614	1	2027	tags=29%, list=11%, signal=32%
												219	GOBP_NEGATIVE_REGULATION_OF_RESPONSE_TO_BIOTIC_STIMULUS	147	-0.44	-1.36	0	0.611	1	5143	tags=39%, list=27%, signal=54%
												220	GOBP_POLYSACCHARIDE_CATABOLIC_PROCESS	29	-0.51	-1.36	0.057	0.609	1	5241	tags=52%, list=27%, signal=71%
												221	GOBP_SURFACTANT_HOMEOSTASIS	27	-0.51	-1.36	0.071	0.61	1	1504	tags=22%, list=8%, signal=24%
												222	GOBP_REGULATION_OF_CELLULAR_RESPONSE_TO_VASCULAR_ENDOTHELIAL_GROWTH_FACTOR_STIMULUS	25	-0.52	-1.36	0.052	0.609	1	5303	tags=48%, list=28%, signal=66%
												223	GOBP_AMINO_ACID_ACTIVATION	44	-0.48	-1.36	0.032	0.607	1	7154	tags=64%, list=37%, signal=101%
												224	GOBP_REGULATION_OF_T_CELL_MEDIATED_IMMUNITY	86	-0.45	-1.36	0.01	0.605	1	3473	tags=30%, list=18%, signal=37%
												225	GOBP_REGULATION_OF_PROTEIN_SUMOYLATION	24	-0.52	-1.36	0.048	0.605	1	7113	tags=67%, list=37%, signal=106%
												226	GOBP_REGULATION_OF_POLYSACCHARIDE_METABOLIC_PROCESS	48	-0.48	-1.36	0.036	0.603	1	6111	tags=50%, list=32%, signal=73%
												227	GOBP_NEGATIVE_REGULATION_OF_INFLAMMATORY_RESPONSE_TO_ANTIGENIC_STIMULUS	18	-0.55	-1.36	0.07	0.6	1	3387	tags=39%, list=18%, signal=47%
												228	GOBP_POSITIVE_REGULATION_OF_BEHAVIOR	39	-0.49	-1.36	0.048	0.598	1	1903	tags=26%, list=10%, signal=28%
												229	GOBP_MITRAL_VALVE_DEVELOPMENT	15	-0.57	-1.36	0.069	0.597	1	5902	tags=67%, list=31%, signal=96%
												230	GOBP_NEGATIVE_REGULATION_OF_AUTOPHAGY	80	-0.46	-1.36	0.015	0.598	1	7902	tags=68%, list=41%, signal=114%
												231	GOBP_LACTATION	52	-0.47	-1.36	0.029	0.597	1	2616	tags=21%, list=14%, signal=24%
												232	GOBP_POSITIVE_REGULATION_OF_FATTY_ACID_OXIDATION	22	-0.53	-1.36	0.062	0.601	1	2999	tags=41%, list=16%, signal=48%
												233	GOBP_REGULATION_OF_CELL_MIGRATION_INVOLVED_IN_SPROUTING_ANGIOGENESIS	39	-0.49	-1.36	0.04	0.609	1	5261	tags=46%, list=27%, signal=63%
												234	GOBP_ADRENERGIC_RECEPTOR_SIGNALING_PATHWAY	31	-0.5	-1.36	0.05	0.608	1	5108	tags=48%, list=27%, signal=66%
												235	GOBP_NEGATIVE_REGULATION_OF_TYPE_I_INTERFERON_MEDIATED_SIGNALING_PATHWAY	23	-0.53	-1.36	0.059	0.606	1	5770	tags=48%, list=30%, signal=68%
												236	GOBP_POSITIVE_REGULATION_OF_TRIGLYCERIDE_BIOSYNTHETIC_PROCESS	19	-0.54	-1.36	0.071	0.604	1	3279	tags=47%, list=17%, signal=57%
												237	GOBP_EXECUTION_PHASE_OF_APOPTOSIS	73	-0.46	-1.36	0.021	0.606	1	4133	tags=40%, list=22%, signal=50%
												238	GOBP_FATTY_ACID_BETA_OXIDATION	74	-0.46	-1.36	0.015	0.604	1	8257	tags=68%, list=43%, signal=118%
												239	GOBP_ANATOMICAL_STRUCTURE_REGRESSION	19	-0.55	-1.36	0.063	0.602	1	5233	tags=53%, list=27%, signal=72%
												240	GOBP_REGULATION_OF_VASCULOGENESIS	15	-0.58	-1.36	0.074	0.603	1	2739	tags=40%, list=14%, signal=47%
												241	GOBP_MIDBODY_ABSCISSION	15	-0.57	-1.36	0.063	0.606	1	3619	tags=47%, list=19%, signal=57%
												242	GOBP_CD40_SIGNALING_PATHWAY	17	-0.55	-1.36	0.073	0.605	1	6597	tags=59%, list=34%, signal=90%
												243	GOBP_REGULATION_OF_RESPONSE_TO_EXTRACELLULAR_STIMULUS	36	-0.49	-1.36	0.048	0.606	1	1661	tags=22%, list=9%, signal=24%
												244	GOBP_POSITIVE_REGULATION_OF_PHOSPHOLIPID_METABOLIC_PROCESS	15	-0.58	-1.35	0.079	0.605	1	3612	tags=40%, list=19%, signal=49%
												245	GOBP_NITRIC_OXIDE_SYNTHASE_BIOSYNTHETIC_PROCESS	26	-0.51	-1.35	0.055	0.607	1	2255	tags=31%, list=12%, signal=35%
												246	GOBP_AORTA_DEVELOPMENT	72	-0.45	-1.35	0.012	0.604	1	7812	tags=60%, list=41%, signal=100%
												247	GOBP_REGULATION_OF_APPETITE	26	-0.51	-1.35	0.057	0.605	1	2095	tags=23%, list=11%, signal=26%
												248	GOBP_HEART_TRABECULA_MORPHOGENESIS	37	-0.49	-1.35	0.05	0.606	1	7752	tags=70%, list=40%, signal=118%
												249	GOBP_NEGATIVE_REGULATION_OF_PHOSPHATIDYLINOSITOL_3_KINASE_PROTEIN_KINASE_B_SIGNAL_TRANSDUCTION	57	-0.47	-1.35	0.033	0.605	1	5303	tags=51%, list=28%, signal=70%
												250	GOBP_POSITIVE_REGULATION_OF_STEROL_TRANSPORT	41	-0.48	-1.35	0.05	0.604	1	5901	tags=59%, list=31%, signal=84%
												251	GOBP_VITAMIN_METABOLIC_PROCESS	90	-0.44	-1.35	0.012	0.605	1	4086	tags=39%, list=21%, signal=49%
												252	GOBP_REGULATION_OF_HISTONE_METHYLATION	20	-0.54	-1.35	0.076	0.602	1	4357	tags=55%, list=23%, signal=71%
												253	GOBP_VASCULAR_ENDOTHELIAL_GROWTH_FACTOR_RECEPTOR_SIGNALING_PATHWAY	50	-0.47	-1.35	0.035	0.603	1	2916	tags=32%, list=15%, signal=38%
												254	GOBP_ACTIVATION_OF_CYSTEINE_TYPE_ENDOPEPTIDASE_ACTIVITY_INVOLVED_IN_APOPTOTIC_PROCESS	75	-0.45	-1.35	0.014	0.601	1	4846	tags=44%, list=25%, signal=59%
												255	GOBP_NEGATIVE_REGULATION_OF_HORMONE_SECRETION	95	-0.45	-1.35	0.012	0.6	1	3861	tags=33%, list=20%, signal=41%
												256	GOBP_MEMBRANE_DEPOLARIZATION	96	-0.45	-1.35	0.012	0.599	1	3430	tags=27%, list=18%, signal=33%
												257	GOBP_POSITIVE_REGULATION_OF_VACUOLE_ORGANIZATION	24	-0.52	-1.35	0.073	0.603	1	3912	tags=46%, list=20%, signal=58%
												258	GOBP_NODAL_SIGNALING_PATHWAY	19	-0.54	-1.35	0.081	0.611	1	7153	tags=63%, list=37%, signal=101%
												259	GOBP_NEGATIVE_REGULATION_OF_POTASSIUM_ION_TRANSMEMBRANE_TRANSPORT	29	-0.5	-1.35	0.068	0.613	1	1888	tags=24%, list=10%, signal=27%
												260	GOBP_NUCLEOLUS_ORGANIZATION	17	-0.55	-1.35	0.069	0.611	1	3278	tags=41%, list=17%, signal=50%
												261	GOBP_METANEPHRIC_NEPHRON_EPITHELIUM_DEVELOPMENT	20	-0.54	-1.35	0.067	0.611	1	1806	tags=30%, list=9%, signal=33%
												262	GOBP_REGULATION_OF_CENTROSOME_CYCLE	52	-0.47	-1.35	0.039	0.613	1	4865	tags=50%, list=25%, signal=67%
												263	GOBP_REGULATION_OF_MESENCHYMAL_CELL_PROLIFERATION	41	-0.48	-1.35	0.038	0.611	1	3881	tags=44%, list=20%, signal=55%
												264	GOBP_PHOSPHATIDIC_ACID_BIOSYNTHETIC_PROCESS	22	-0.53	-1.35	0.066	0.614	1	6083	tags=59%, list=32%, signal=86%
												265	GOBP_BILE_ACID_AND_BILE_SALT_TRANSPORT	27	-0.51	-1.34	0.061	0.618	1	1347	tags=30%, list=7%, signal=32%
												266	GOBP_POSITIVE_REGULATION_OF_NUCLEOTIDE_METABOLIC_PROCESS	26	-0.52	-1.34	0.067	0.618	1	3281	tags=38%, list=17%, signal=46%
												267	GOBP_ADENOHYPOPHYSIS_DEVELOPMENT	16	-0.56	-1.34	0.093	0.618	1	1945	tags=25%, list=10%, signal=28%
												268	GOBP_NATURAL_KILLER_CELL_PROLIFERATION	21	-0.52	-1.34	0.069	0.625	1	2818	tags=33%, list=15%, signal=39%
												269	GOBP_POTASSIUM_ION_HOMEOSTASIS	34	-0.49	-1.34	0.054	0.623	1	8064	tags=50%, list=42%, signal=86%
												270	GOBP_BENZENE_CONTAINING_COMPOUND_METABOLIC_PROCESS	20	-0.54	-1.34	0.07	0.621	1	4926	tags=50%, list=26%, signal=67%
												271	GOBP_REGULATION_OF_LACTATION	21	-0.53	-1.34	0.082	0.621	1	129	tags=5%, list=1%, signal=5%
												272	GOBP_ORGANOPHOSPHATE_ESTER_TRANSPORT	130	-0.44	-1.34	0.007	0.619	1	5691	tags=48%, list=30%, signal=68%
												273	GOBP_CELL_SURFACE_RECEPTOR_SIGNALING_PATHWAY_INVOLVED_IN_HEART_DEVELOPMENT	23	-0.52	-1.34	0.055	0.618	1	5298	tags=57%, list=28%, signal=78%
												274	GOBP_CELL_COMMUNICATION_BY_ELECTRICAL_COUPLING	19	-0.55	-1.34	0.07	0.618	1	6972	tags=63%, list=36%, signal=99%
												275	GOBP_TRANSEPITHELIAL_TRANSPORT	33	-0.49	-1.34	0.057	0.621	1	2426	tags=30%, list=13%, signal=35%
												276	GOBP_LIPOSACCHARIDE_METABOLIC_PROCESS	94	-0.44	-1.34	0.018	0.622	1	6707	tags=50%, list=35%, signal=77%
												277	GOBP_GLUCAN_BIOSYNTHETIC_PROCESS	47	-0.47	-1.34	0.045	0.63	1	6111	tags=51%, list=32%, signal=75%
												278	GOBP_RESPONSE_TO_RETINOIC_ACID	82	-0.45	-1.34	0.023	0.633	1	4620	tags=38%, list=24%, signal=50%
												279	GOBP_POSITIVE_REGULATION_OF_VIRAL_GENOME_REPLICATION	28	-0.5	-1.34	0.058	0.637	1	3041	tags=36%, list=16%, signal=42%
												280	GOBP_PEPTIDE_CROSS_LINKING	26	-0.5	-1.34	0.065	0.635	1	1760	tags=35%, list=9%, signal=38%
												281	GOBP_POSITIVE_REGULATION_OF_PROTEIN_SUMOYLATION	15	-0.55	-1.34	0.091	0.635	1	6859	tags=73%, list=36%, signal=114%
												282	GOBP_FOLIC_ACID_CONTAINING_COMPOUND_METABOLIC_PROCESS	24	-0.51	-1.33	0.075	0.64	1	3564	tags=42%, list=19%, signal=51%
												283	GOBP_HEME_BIOSYNTHETIC_PROCESS	26	-0.51	-1.33	0.075	0.642	1	3716	tags=42%, list=19%, signal=52%
												284	GOBP_RESPONSE_TO_NUTRIENT	76	-0.44	-1.33	0.021	0.641	1	6812	tags=57%, list=36%, signal=87%
												285	GOBP_PROGRAMMED_NECROTIC_CELL_DEATH	49	-0.47	-1.33	0.038	0.641	1	5264	tags=51%, list=27%, signal=70%
												286	GOBP_NEGATIVE_REGULATION_OF_FATTY_ACID_METABOLIC_PROCESS	38	-0.48	-1.33	0.059	0.639	1	4090	tags=34%, list=21%, signal=43%
												287	GOBP_CELL_CELL_SIGNALING_INVOLVED_IN_CARDIAC_CONDUCTION	27	-0.5	-1.33	0.07	0.641	1	4416	tags=37%, list=23%, signal=48%
												288	GOBP_PROTEIN_K11_LINKED_UBIQUITINATION	27	-0.51	-1.33	0.054	0.646	1	6996	tags=59%, list=36%, signal=93%
												289	GOBP_ENDOTHELIUM_DEVELOPMENT	137	-0.43	-1.33	0.006	0.648	1	5105	tags=47%, list=27%, signal=63%
												290	GOBP_REGULATION_OF_MITOCHONDRIAL_FISSION	35	-0.49	-1.33	0.055	0.648	1	4547	tags=46%, list=24%, signal=60%
												291	GOBP_MESENCHYME_MORPHOGENESIS	59	-0.46	-1.33	0.04	0.648	1	3934	tags=37%, list=21%, signal=47%
												292	GOBP_INDUCTION_OF_POSITIVE_CHEMOTAXIS	15	-0.56	-1.33	0.077	0.65	1	1316	tags=27%, list=7%, signal=29%
												293	GOBP_VITAMIN_TRANSPORT	46	-0.47	-1.33	0.039	0.65	1	3110	tags=35%, list=16%, signal=41%
												294	GOBP_MIDDLE_EAR_MORPHOGENESIS	25	-0.51	-1.33	0.086	0.648	1	6111	tags=56%, list=32%, signal=82%
												295	GOBP_MITOCHONDRIAL_DNA_REPLICATION	15	-0.56	-1.33	0.083	0.647	1	4102	tags=47%, list=21%, signal=59%
												296	GOBP_RNA_MODIFICATION	150	-0.43	-1.33	0.01	0.646	1	5373	tags=43%, list=28%, signal=59%
												297	GOBP_SNRNA_3_END_PROCESSING	21	-0.52	-1.33	0.092	0.644	1	5165	tags=57%, list=27%, signal=78%
												298	GOBP_SYNAPTIC_TRANSMISSION_DOPAMINERGIC	31	-0.48	-1.33	0.075	0.644	1	2166	tags=19%, list=11%, signal=22%
												299	GOBP_MESODERMAL_CELL_FATE_COMMITMENT	17	-0.54	-1.33	0.097	0.642	1	7134	tags=59%, list=37%, signal=94%
												300	GOBP_POSITIVE_REGULATION_OF_RECEPTOR_RECYCLING	17	-0.54	-1.33	0.099	0.644	1	6323	tags=65%, list=33%, signal=96%
												301	GOBP_REGULATORY_NCRNA_PROCESSING	83	-0.44	-1.33	0.015	0.642	1	8388	tags=59%, list=44%, signal=104%
												302	GOBP_CELLULAR_COMPONENT_DISASSEMBLY_INVOLVED_IN_EXECUTION_PHASE_OF_APOPTOSIS	33	-0.49	-1.33	0.055	0.649	1	4091	tags=45%, list=21%, signal=58%
												303	GOBP_CELL_COMMUNICATION_INVOLVED_IN_CARDIAC_CONDUCTION	40	-0.48	-1.33	0.067	0.649	1	4416	tags=38%, list=23%, signal=49%
												304	GOBP_POSITIVE_REGULATION_OF_NITRIC_OXIDE_SYNTHASE_BIOSYNTHETIC_PROCESS	20	-0.52	-1.33	0.093	0.65	1	2255	tags=30%, list=12%, signal=34%
												305	GOBP_HYALURONAN_CATABOLIC_PROCESS	19	-0.53	-1.33	0.101	0.648	1	5522	tags=42%, list=29%, signal=59%
												306	GOBP_ATRIAL_CARDIAC_MUSCLE_TISSUE_DEVELOPMENT	21	-0.53	-1.32	0.081	0.651	1	5613	tags=52%, list=29%, signal=74%
												307	GOBP_HIPPO_SIGNALING	39	-0.47	-1.32	0.059	0.651	1	6251	tags=54%, list=33%, signal=80%
												308	GOBP_AMYLOID_FIBRIL_FORMATION	29	-0.5	-1.32	0.071	0.649	1	6532	tags=59%, list=34%, signal=89%
												309	GOBP_NEGATIVE_REGULATION_OF_POTASSIUM_ION_TRANSMEMBRANE_TRANSPORTER_ACTIVITY	24	-0.51	-1.32	0.077	0.649	1	1888	tags=25%, list=10%, signal=28%
												310	GOBP_PEPTIDE_HORMONE_PROCESSING	26	-0.51	-1.32	0.076	0.648	1	4544	tags=46%, list=24%, signal=60%
												311	GOBP_AMINO_SUGAR_METABOLIC_PROCESS	43	-0.47	-1.32	0.048	0.646	1	6029	tags=53%, list=31%, signal=78%
												312	GOBP_MESODERM_MORPHOGENESIS	72	-0.44	-1.32	0.043	0.645	1	7694	tags=61%, list=40%, signal=102%
												313	GOBP_EMBRYONIC_HEART_TUBE_MORPHOGENESIS	70	-0.44	-1.32	0.037	0.645	1	7530	tags=56%, list=39%, signal=91%
												314	GOBP_EPITHELIAL_CELL_MATURATION	27	-0.5	-1.32	0.078	0.649	1	7051	tags=52%, list=37%, signal=82%
												315	GOBP_TRANSCRIPTION_BY_RNA_POLYMERASE_I	64	-0.45	-1.32	0.035	0.649	1	7335	tags=58%, list=38%, signal=93%
												316	GOBP_MONOSACCHARIDE_METABOLIC_PROCESS	271	-0.42	-1.32	0.003	0.649	1	6324	tags=45%, list=33%, signal=66%
												317	GOBP_FATTY_ACID_CATABOLIC_PROCESS	105	-0.43	-1.32	0.016	0.65	1	8257	tags=65%, list=43%, signal=113%
												318	GOBP_NEGATIVE_REGULATION_OF_BIOMINERAL_TISSUE_DEVELOPMENT	25	-0.51	-1.32	0.085	0.648	1	3017	tags=32%, list=16%, signal=38%
												319	GOBP_NEGATIVE_REGULATION_OF_NF_KAPPAB_TRANSCRIPTION_FACTOR_ACTIVITY	82	-0.44	-1.32	0.029	0.649	1	5179	tags=40%, list=27%, signal=55%
												320	GOBP_NEGATIVE_REGULATION_OF_EPITHELIAL_CELL_APOPTOTIC_PROCESS	75	-0.44	-1.32	0.029	0.649	1	5771	tags=43%, list=30%, signal=61%
												321	GOBP_HEART_FORMATION	34	-0.49	-1.32	0.065	0.648	1	3989	tags=41%, list=21%, signal=52%
												322	GOBP_EATING_BEHAVIOR	52	-0.46	-1.32	0.051	0.647	1	3387	tags=33%, list=18%, signal=40%
												323	GOBP_REGULATION_OF_DEFENSE_RESPONSE_TO_BACTERIUM	20	-0.53	-1.32	0.089	0.645	1	705	tags=30%, list=4%, signal=31%
												324	GOBP_NEGATIVE_REGULATION_OF_ANOIKIS	15	-0.55	-1.32	0.109	0.645	1	6911	tags=73%, list=36%, signal=115%
												325	GOBP_REGULATION_OF_MICROTUBULE_POLYMERIZATION	55	-0.45	-1.32	0.049	0.646	1	7974	tags=67%, list=42%, signal=115%
												326	GOBP_POSITIVE_REGULATION_OF_MICROTUBULE_POLYMERIZATION_OR_DEPOLYMERIZATION	35	-0.48	-1.32	0.061	0.644	1	7422	tags=66%, list=39%, signal=107%
												327	GOBP_BRANCHING_INVOLVED_IN_SALIVARY_GLAND_MORPHOGENESIS	28	-0.5	-1.32	0.068	0.644	1	3418	tags=36%, list=18%, signal=43%
												328	GOBP_REGULATION_OF_PLASMA_LIPOPROTEIN_PARTICLE_LEVELS	67	-0.44	-1.32	0.041	0.644	1	5975	tags=46%, list=31%, signal=67%
												329	GOBP_NEGATIVE_REGULATION_OF_OSSIFICATION	45	-0.46	-1.32	0.058	0.642	1	1772	tags=22%, list=9%, signal=24%
												330	GOBP_POLYSACCHARIDE_METABOLIC_PROCESS	106	-0.43	-1.32	0.015	0.641	1	6111	tags=49%, list=32%, signal=72%
												331	GOBP_T_CELL_MEDIATED_CYTOTOXICITY	48	-0.46	-1.32	0.057	0.64	1	3359	tags=31%, list=18%, signal=38%
												332	GOBP_POSITIVE_REGULATION_OF_RECEPTOR_MEDIATED_ENDOCYTOSIS	63	-0.45	-1.32	0.041	0.64	1	2869	tags=30%, list=15%, signal=35%
												333	GOBP_SNRNA_PROCESSING	25	-0.5	-1.32	0.1	0.639	1	5787	tags=60%, list=30%, signal=86%
												334	GOBP_RESPONSE_TO_OXYGEN_RADICAL	24	-0.51	-1.32	0.099	0.639	1	8092	tags=79%, list=42%, signal=137%
												335	GOBP_VASCULAR_ASSOCIATED_SMOOTH_MUSCLE_CELL_DIFFERENTIATION	41	-0.47	-1.32	0.063	0.639	1	4513	tags=44%, list=24%, signal=57%
												336	GOBP_VENTRICULAR_CARDIAC_MUSCLE_CELL_ACTION_POTENTIAL	29	-0.49	-1.32	0.076	0.639	1	5095	tags=38%, list=27%, signal=52%
												337	GOBP_NEGATIVE_REGULATION_OF_BEHAVIOR	28	-0.5	-1.32	0.074	0.639	1	3161	tags=32%, list=16%, signal=38%
												338	GOBP_POSITIVE_REGULATION_OF_GLUCOSE_METABOLIC_PROCESS	53	-0.45	-1.32	0.054	0.637	1	6251	tags=51%, list=33%, signal=75%
												339	GOBP_POSITIVE_REGULATION_OF_PROTEASOMAL_UBIQUITIN_DEPENDENT_PROTEIN_CATABOLIC_PROCESS	87	-0.44	-1.32	0.025	0.635	1	7969	tags=64%, list=42%, signal=110%
												340	GOBP_ACTIN_MEDIATED_CELL_CONTRACTION	98	-0.43	-1.32	0.016	0.634	1	6489	tags=51%, list=34%, signal=77%
												341	GOBP_CELLULAR_RESPONSE_TO_SALT_STRESS	16	-0.54	-1.32	0.102	0.636	1	5978	tags=38%, list=31%, signal=54%
												342	GOBP_INSULIN_METABOLIC_PROCESS	19	-0.52	-1.32	0.097	0.635	1	4761	tags=42%, list=25%, signal=56%
												343	GOBP_REGULATION_OF_CHOLESTEROL_METABOLIC_PROCESS	40	-0.47	-1.32	0.077	0.634	1	5211	tags=45%, list=27%, signal=62%
												344	GOBP_N_ACETYLGLUCOSAMINE_METABOLIC_PROCESS	16	-0.54	-1.31	0.109	0.635	1	4464	tags=56%, list=23%, signal=73%
												345	GOBP_NEGATIVE_REGULATION_OF_CELL_KILLING	33	-0.48	-1.31	0.066	0.633	1	2091	tags=27%, list=11%, signal=31%
												346	GOBP_POSITIVE_REGULATION_OF_RESPONSE_TO_TUMOR_CELL	18	-0.54	-1.31	0.093	0.634	1	4454	tags=39%, list=23%, signal=51%
												347	GOBP_FATTY_ACID_HOMEOSTASIS	17	-0.54	-1.31	0.1	0.634	1	4363	tags=41%, list=23%, signal=53%
												348	GOBP_POSITIVE_REGULATION_OF_DEFENSE_RESPONSE_TO_VIRUS_BY_HOST	33	-0.48	-1.31	0.073	0.638	1	3765	tags=36%, list=20%, signal=45%
												349	GOBP_REGULATION_OF_NOTCH_SIGNALING_PATHWAY	88	-0.43	-1.31	0.028	0.638	1	4444	tags=39%, list=23%, signal=50%
												350	GOBP_MONOCARBOXYLIC_ACID_CATABOLIC_PROCESS	131	-0.42	-1.31	0.016	0.636	1	8257	tags=62%, list=43%, signal=108%
												351	GOBP_REGULATION_OF_MITOCHONDRION_ORGANIZATION	142	-0.42	-1.31	0.016	0.635	1	5193	tags=43%, list=27%, signal=58%
												352	GOBP_BRANCHED_CHAIN_AMINO_ACID_METABOLIC_PROCESS	24	-0.5	-1.31	0.088	0.633	1	8539	tags=75%, list=45%, signal=135%
												353	GOBP_REGULATION_OF_CARDIAC_MUSCLE_CELL_CONTRACTION	38	-0.47	-1.31	0.063	0.634	1	8066	tags=66%, list=42%, signal=113%
												354	GOBP_POSITIVE_REGULATION_OF_PROTEIN_CATABOLIC_PROCESS	201	-0.41	-1.31	0.003	0.635	1	7969	tags=61%, list=42%, signal=104%
												355	GOBP_TETRAPYRROLE_BIOSYNTHETIC_PROCESS	31	-0.49	-1.31	0.067	0.634	1	4281	tags=45%, list=22%, signal=58%
												356	GOBP_AUTOPHAGOSOME_ORGANIZATION	120	-0.42	-1.31	0.023	0.634	1	7853	tags=63%, list=41%, signal=105%
												357	GOBP_STEROL_BIOSYNTHETIC_PROCESS	58	-0.45	-1.31	0.045	0.633	1	7521	tags=59%, list=39%, signal=96%
												358	GOBP_PHOSPHOLIPID_HOMEOSTASIS	17	-0.54	-1.31	0.106	0.633	1	5529	tags=53%, list=29%, signal=74%
												359	GOBP_POSITIVE_REGULATION_OF_GLUCONEOGENESIS	26	-0.51	-1.31	0.091	0.632	1	4462	tags=46%, list=23%, signal=60%
												360	GOBP_ANOIKIS	31	-0.49	-1.31	0.073	0.632	1	7368	tags=71%, list=38%, signal=115%
												361	GOBP_NEGATIVE_REGULATION_OF_ACTIVIN_RECEPTOR_SIGNALING_PATHWAY	15	-0.55	-1.31	0.112	0.631	1	5698	tags=53%, list=30%, signal=76%
												362	GOBP_INTRACILIARY_RETROGRADE_TRANSPORT	16	-0.54	-1.31	0.112	0.632	1	7111	tags=69%, list=37%, signal=109%
												363	GOBP_RESPONSE_TO_MUSCLE_STRETCH	21	-0.52	-1.31	0.107	0.634	1	498	tags=19%, list=3%, signal=20%
												364	GOBP_IMMUNE_RESPONSE_TO_TUMOR_CELL	28	-0.49	-1.31	0.082	0.634	1	5241	tags=43%, list=27%, signal=59%
												365	GOBP_MOTOR_BEHAVIOR	26	-0.5	-1.31	0.105	0.633	1	7853	tags=69%, list=41%, signal=117%
												366	GOBP_REGULATION_OF_MYOBLAST_PROLIFERATION	21	-0.52	-1.31	0.096	0.636	1	3768	tags=33%, list=20%, signal=41%
												367	GOBP_SPHINGOID_METABOLIC_PROCESS	22	-0.51	-1.31	0.099	0.636	1	4690	tags=59%, list=24%, signal=78%
												368	GOBP_PROTEIN_LOCALIZATION_TO_CELL_SURFACE	71	-0.44	-1.31	0.049	0.637	1	8626	tags=66%, list=45%, signal=120%
												369	GOBP_RESPONSE_TO_INTERFERON_ALPHA	25	-0.5	-1.31	0.084	0.636	1	6153	tags=52%, list=32%, signal=76%
												370	GOBP_NEGATIVE_REGULATION_OF_REACTIVE_OXYGEN_SPECIES_BIOSYNTHETIC_PROCESS	21	-0.51	-1.31	0.103	0.635	1	3281	tags=33%, list=17%, signal=40%
												371	GOBP_REGULATION_OF_CENTRIOLE_REPLICATION	20	-0.52	-1.31	0.085	0.634	1	4526	tags=55%, list=24%, signal=72%
												372	GOBP_POSITIVE_REGULATION_OF_MULTICELLULAR_ORGANISM_GROWTH	42	-0.46	-1.31	0.06	0.632	1	4140	tags=38%, list=22%, signal=48%
												373	GOBP_NEGATIVE_REGULATION_OF_PROTEIN_SECRETION	88	-0.43	-1.31	0.028	0.633	1	4964	tags=38%, list=26%, signal=50%
												374	GOBP_BASIC_AMINO_ACID_TRANSPORT	17	-0.54	-1.31	0.096	0.633	1	2203	tags=41%, list=11%, signal=46%
												375	GOBP_EPIGENETIC_PROGRAMMING_IN_THE_ZYGOTIC_PRONUCLEI	16	-0.54	-1.31	0.11	0.637	1	2367	tags=25%, list=12%, signal=28%
												376	GOBP_SPECIFICATION_OF_SYMMETRY	145	-0.42	-1.3	0.018	0.64	1	5698	tags=46%, list=30%, signal=64%
												377	GOBP_MEMBRANE_LIPID_CATABOLIC_PROCESS	36	-0.47	-1.3	0.073	0.643	1	6189	tags=50%, list=32%, signal=74%
												378	GOBP_MYOBLAST_PROLIFERATION	26	-0.49	-1.3	0.098	0.642	1	3768	tags=35%, list=20%, signal=43%
												379	GOBP_PYRIMIDINE_NUCLEOBASE_METABOLIC_PROCESS	19	-0.52	-1.3	0.111	0.641	1	5897	tags=58%, list=31%, signal=84%
												380	GOBP_NEUTROPHIL_EXTRAVASATION	15	-0.54	-1.3	0.123	0.641	1	6176	tags=60%, list=32%, signal=88%
												381	GOBP_CARDIAC_MUSCLE_CELL_ACTION_POTENTIAL_INVOLVED_IN_CONTRACTION	43	-0.47	-1.3	0.052	0.644	1	5866	tags=44%, list=31%, signal=64%
												382	GOBP_ACETYL_COA_METABOLIC_PROCESS	34	-0.48	-1.3	0.087	0.644	1	5181	tags=47%, list=27%, signal=64%
												383	GOBP_REGULATION_OF_GLIAL_CELL_PROLIFERATION	55	-0.44	-1.3	0.06	0.643	1	2983	tags=31%, list=16%, signal=36%
												384	GOBP_MIRNA_PROCESSING	45	-0.47	-1.3	0.055	0.647	1	8388	tags=67%, list=44%, signal=118%
												385	GOBP_RESPONSE_TO_VITAMIN	34	-0.47	-1.3	0.089	0.649	1	2554	tags=32%, list=13%, signal=37%
												386	GOBP_PROTEIN_SUMOYLATION	42	-0.46	-1.3	0.074	0.649	1	7483	tags=62%, list=39%, signal=101%
												387	GOBP_REGULATION_OF_CARDIAC_MUSCLE_CONTRACTION	68	-0.44	-1.3	0.051	0.648	1	5450	tags=43%, list=28%, signal=59%
												388	GOBP_RESPONSE_TO_FOOD	38	-0.47	-1.3	0.062	0.647	1	4140	tags=34%, list=22%, signal=44%
												389	GOBP_STORE_OPERATED_CALCIUM_ENTRY	26	-0.5	-1.3	0.092	0.646	1	2477	tags=31%, list=13%, signal=35%
												390	GOBP_LIPID_OXIDATION	121	-0.42	-1.3	0.021	0.644	1	8257	tags=62%, list=43%, signal=108%
												391	GOBP_NEGATIVE_REGULATION_OF_FATTY_ACID_OXIDATION	18	-0.53	-1.3	0.109	0.648	1	4798	tags=44%, list=25%, signal=59%
												392	GOBP_POSITIVE_REGULATION_OF_HISTONE_METHYLATION	17	-0.53	-1.3	0.107	0.647	1	4147	tags=53%, list=22%, signal=67%
												393	GOBP_ENDOCRINE_HORMONE_SECRETION	68	-0.44	-1.3	0.043	0.649	1	2706	tags=32%, list=14%, signal=38%
												394	GOBP_EMBRYO_IMPLANTATION	69	-0.44	-1.3	0.043	0.648	1	6774	tags=42%, list=35%, signal=65%
												395	GOBP_GLYCOSAMINOGLYCAN_CATABOLIC_PROCESS	31	-0.49	-1.3	0.081	0.647	1	5522	tags=45%, list=29%, signal=63%
												396	GOBP_POSITIVE_REGULATION_OF_AMIDE_METABOLIC_PROCESS	165	-0.41	-1.3	0.009	0.646	1	7113	tags=52%, list=37%, signal=82%
												397	GOBP_BONE_GROWTH	40	-0.47	-1.3	0.067	0.649	1	6550	tags=55%, list=34%, signal=83%
												398	GOBP_POSITIVE_REGULATION_OF_CHOLESTEROL_EFFLUX	28	-0.49	-1.3	0.106	0.648	1	3272	tags=43%, list=17%, signal=52%
												399	GOBP_RESPONSE_TO_MITOCHONDRIAL_DEPOLARISATION	23	-0.5	-1.3	0.114	0.65	1	5313	tags=52%, list=28%, signal=72%
												400	GOBP_RESPONSE_TO_INTERFERON_BETA	48	-0.45	-1.3	0.055	0.649	1	3765	tags=38%, list=20%, signal=47%
												401	GOBP_NEGATIVE_REGULATION_OF_INNATE_IMMUNE_RESPONSE	96	-0.43	-1.3	0.031	0.647	1	5143	tags=40%, list=27%, signal=54%
												402	GOBP_BROWN_FAT_CELL_DIFFERENTIATION	63	-0.44	-1.3	0.058	0.648	1	6811	tags=51%, list=36%, signal=79%
												403	GOBP_REGULATION_OF_FATTY_ACID_BIOSYNTHETIC_PROCESS	50	-0.45	-1.3	0.07	0.648	1	3781	tags=32%, list=20%, signal=40%
												404	GOBP_EPITHELIAL_CELL_CELL_ADHESION	16	-0.53	-1.3	0.122	0.651	1	5061	tags=56%, list=26%, signal=76%
												405	GOBP_REGULATION_OF_MEMBRANE_REPOLARIZATION	35	-0.48	-1.29	0.078	0.65	1	7168	tags=54%, list=37%, signal=87%
												406	GOBP_POSITIVE_REGULATION_OF_TRANSLATION	135	-0.42	-1.29	0.022	0.649	1	7026	tags=53%, list=37%, signal=84%
												407	GOBP_TETRAPYRROLE_METABOLIC_PROCESS	52	-0.44	-1.29	0.059	0.649	1	4281	tags=44%, list=22%, signal=57%
												408	GOBP_GANGLIOSIDE_METABOLIC_PROCESS	27	-0.49	-1.29	0.094	0.65	1	6624	tags=52%, list=35%, signal=79%
												409	GOBP_REGULATION_OF_LYASE_ACTIVITY	59	-0.45	-1.29	0.056	0.648	1	6615	tags=51%, list=34%, signal=77%
												410	GOBP_INNER_MITOCHONDRIAL_MEMBRANE_ORGANIZATION	33	-0.47	-1.29	0.088	0.647	1	7147	tags=64%, list=37%, signal=101%
												411	GOBP_STEROL_TRANSPORT	118	-0.42	-1.29	0.02	0.646	1	5931	tags=48%, list=31%, signal=70%
												412	GOBP_POSITIVE_REGULATION_OF_MYELOID_LEUKOCYTE_MEDIATED_IMMUNITY	31	-0.48	-1.29	0.091	0.648	1	2225	tags=32%, list=12%, signal=36%
												413	GOBP_VIRION_ASSEMBLY	25	-0.5	-1.29	0.097	0.651	1	4363	tags=48%, list=23%, signal=62%
												414	GOBP_REGULATION_OF_PHOSPHOLIPID_BIOSYNTHETIC_PROCESS	21	-0.51	-1.29	0.112	0.653	1	3854	tags=43%, list=20%, signal=54%
												415	GOBP_VASCULOGENESIS_INVOLVED_IN_CORONARY_VASCULAR_MORPHOGENESIS	16	-0.54	-1.29	0.117	0.652	1	5407	tags=56%, list=28%, signal=78%
												416	GOBP_NCRNA_PROCESSING	404	-0.4	-1.29	0	0.651	1	7631	tags=53%, list=40%, signal=87%
												417	GOBP_EPITHELIAL_TO_MESENCHYMAL_TRANSITION_INVOLVED_IN_ENDOCARDIAL_CUSHION_FORMATION	18	-0.53	-1.29	0.116	0.65	1	7715	tags=72%, list=40%, signal=121%
												418	GOBP_CELLULAR_RESPONSE_TO_OXYGEN_RADICAL	20	-0.51	-1.29	0.105	0.649	1	8092	tags=80%, list=42%, signal=138%
												419	GOBP_LIPOPROTEIN_LOCALIZATION	18	-0.52	-1.29	0.122	0.65	1	4516	tags=44%, list=24%, signal=58%
												420	GOBP_REGULATION_OF_AUTOPHAGOSOME_MATURATION	16	-0.53	-1.29	0.122	0.65	1	5856	tags=63%, list=31%, signal=90%
												421	GOBP_CARDIAC_MUSCLE_CELL_PROLIFERATION	62	-0.43	-1.29	0.057	0.651	1	6106	tags=48%, list=32%, signal=71%
												422	GOBP_NEGATIVE_REGULATION_OF_INSULIN_SECRETION	58	-0.45	-1.29	0.063	0.651	1	4113	tags=33%, list=21%, signal=42%
												423	GOBP_RESPONSE_TO_TUMOR_CELL	41	-0.46	-1.29	0.084	0.653	1	5241	tags=41%, list=27%, signal=57%
												424	GOBP_AORTA_MORPHOGENESIS	37	-0.47	-1.29	0.079	0.653	1	5863	tags=51%, list=31%, signal=74%
												425	GOBP_NEGATIVE_REGULATION_OF_TRANSCRIPTION_ELONGATION_BY_RNA_POLYMERASE_II	15	-0.54	-1.29	0.119	0.653	1	8370	tags=87%, list=44%, signal=154%
												426	GOBP_RESPONSE_TO_CATECHOLAMINE	72	-0.43	-1.29	0.053	0.652	1	4190	tags=32%, list=22%, signal=41%
												427	GOBP_NEGATIVE_REGULATION_OF_ESTABLISHMENT_OF_PROTEIN_LOCALIZATION	151	-0.41	-1.29	0.016	0.652	1	4363	tags=34%, list=23%, signal=44%
												428	GOBP_GLYCOSPHINGOLIPID_METABOLIC_PROCESS	52	-0.45	-1.29	0.074	0.651	1	6707	tags=52%, list=35%, signal=80%
												429	GOBP_NEGATIVE_REGULATION_OF_CATECHOLAMINE_SECRETION	19	-0.52	-1.29	0.113	0.65	1	800	tags=26%, list=4%, signal=27%
												430	GOBP_REGULATION_OF_VASCULAR_ENDOTHELIAL_GROWTH_FACTOR_RECEPTOR_SIGNALING_PATHWAY	32	-0.48	-1.29	0.105	0.65	1	7139	tags=59%, list=37%, signal=94%
												431	GOBP_REGULATION_OF_POLYSACCHARIDE_BIOSYNTHETIC_PROCESS	40	-0.46	-1.29	0.088	0.649	1	4450	tags=40%, list=23%, signal=52%
												432	GOBP_REGULATION_OF_PROTEIN_KINASE_C_SIGNALING	20	-0.51	-1.29	0.104	0.648	1	5705	tags=55%, list=30%, signal=78%
												433	GOBP_PROTEIN_LOCALIZATION_TO_ENDOSOME	28	-0.48	-1.29	0.107	0.647	1	4947	tags=57%, list=26%, signal=77%
												434	GOBP_STRIATED_MUSCLE_CONTRACTION	171	-0.41	-1.29	0.016	0.649	1	5866	tags=40%, list=31%, signal=58%
												435	GOBP_NEGATIVE_REGULATION_OF_CELL_FATE_COMMITMENT	15	-0.55	-1.29	0.118	0.65	1	483	tags=20%, list=3%, signal=21%
												436	GOBP_SUBSTRATE_DEPENDENT_CELL_MIGRATION	30	-0.48	-1.29	0.1	0.652	1	5703	tags=50%, list=30%, signal=71%
												437	GOBP_CELLULAR_RESPONSE_TO_UNFOLDED_PROTEIN	82	-0.43	-1.29	0.049	0.651	1	8560	tags=65%, list=45%, signal=116%
												438	GOBP_POSITIVE_REGULATION_OF_NATURAL_KILLER_CELL_ACTIVATION	34	-0.47	-1.29	0.102	0.65	1	2868	tags=35%, list=15%, signal=41%
												439	GOBP_NEGATIVE_REGULATION_OF_GLYCOPROTEIN_METABOLIC_PROCESS	15	-0.54	-1.29	0.112	0.65	1	2216	tags=40%, list=12%, signal=45%
												440	GOBP_POSITIVE_REGULATION_OF_MYOBLAST_PROLIFERATION	16	-0.53	-1.29	0.126	0.651	1	3768	tags=44%, list=20%, signal=54%
												441	GOBP_MEMBRANE_DEPOLARIZATION_DURING_ACTION_POTENTIAL	31	-0.48	-1.29	0.084	0.651	1	4983	tags=39%, list=26%, signal=52%
												442	GOBP_ORGANELLE_DISASSEMBLY	135	-0.41	-1.29	0.02	0.65	1	7651	tags=60%, list=40%, signal=99%
												443	GOBP_REGULATORY_NCRNA_MEDIATED_GENE_SILENCING	165	-0.41	-1.29	0.013	0.649	1	8388	tags=46%, list=44%, signal=81%
												444	GOBP_EMBRYONIC_FORELIMB_MORPHOGENESIS	36	-0.46	-1.29	0.112	0.649	1	6989	tags=58%, list=36%, signal=92%
												445	GOBP_NEGATIVE_REGULATION_OF_RHO_PROTEIN_SIGNAL_TRANSDUCTION	25	-0.49	-1.28	0.108	0.649	1	7849	tags=72%, list=41%, signal=122%
												446	GOBP_THIOESTER_BIOSYNTHETIC_PROCESS	27	-0.49	-1.28	0.117	0.651	1	7384	tags=63%, list=39%, signal=102%
												447	GOBP_GOLGI_ORGANIZATION	135	-0.41	-1.28	0.031	0.65	1	8615	tags=71%, list=45%, signal=128%
												448	GOBP_NEGATIVE_REGULATION_OF_SYSTEMIC_ARTERIAL_BLOOD_PRESSURE	31	-0.48	-1.28	0.088	0.651	1	2791	tags=32%, list=15%, signal=38%
												449	GOBP_PYRIMIDINE_RIBONUCLEOTIDE_METABOLIC_PROCESS	27	-0.48	-1.28	0.114	0.65	1	5922	tags=52%, list=31%, signal=75%
												450	GOBP_POSITIVE_REGULATION_OF_UBIQUITIN_DEPENDENT_PROTEIN_CATABOLIC_PROCESS	102	-0.42	-1.28	0.033	0.656	1	7969	tags=63%, list=42%, signal=107%
												451	GOBP_SKELETAL_MUSCLE_CONTRACTION	41	-0.46	-1.28	0.093	0.657	1	5866	tags=44%, list=31%, signal=63%
												452	GOBP_TRABECULA_MORPHOGENESIS	57	-0.44	-1.28	0.062	0.658	1	7752	tags=63%, list=40%, signal=106%
												453	GOBP_POSITIVE_REGULATION_OF_MACROAUTOPHAGY	77	-0.43	-1.28	0.044	0.658	1	5167	tags=42%, list=27%, signal=57%
												454	GOBP_HEME_METABOLIC_PROCESS	36	-0.46	-1.28	0.091	0.657	1	4199	tags=42%, list=22%, signal=53%
												455	GOBP_NEGATIVE_REGULATION_OF_POTASSIUM_ION_TRANSPORT	40	-0.46	-1.28	0.081	0.657	1	3687	tags=28%, list=19%, signal=34%
												456	GOBP_REGULATION_OF_TOLL_LIKE_RECEPTOR_4_SIGNALING_PATHWAY	26	-0.49	-1.28	0.115	0.656	1	5486	tags=50%, list=29%, signal=70%
												457	GOBP_POSITIVE_REGULATION_OF_PROTEOLYSIS_INVOLVED_IN_PROTEIN_CATABOLIC_PROCESS	126	-0.41	-1.28	0.024	0.655	1	7969	tags=61%, list=42%, signal=104%
												458	GOBP_RESPONSE_TO_UV_B	21	-0.5	-1.28	0.117	0.655	1	8188	tags=71%, list=43%, signal=125%
												459	GOBP_PYRIDINE_CONTAINING_COMPOUND_METABOLIC_PROCESS	87	-0.43	-1.28	0.037	0.655	1	5171	tags=41%, list=27%, signal=56%
												460	GOBP_CHOLESTEROL_STORAGE	24	-0.5	-1.28	0.118	0.658	1	4826	tags=50%, list=25%, signal=67%
												461	GOBP_REGULATION_OF_ACTIVIN_RECEPTOR_SIGNALING_PATHWAY	28	-0.48	-1.28	0.116	0.658	1	7153	tags=54%, list=37%, signal=85%
												462	GOBP_ANTIVIRAL_INNATE_IMMUNE_RESPONSE	47	-0.45	-1.28	0.079	0.658	1	7280	tags=62%, list=38%, signal=99%
												463	GOBP_MACROAUTOPHAGY	263	-0.4	-1.28	0.003	0.658	1	8192	tags=62%, list=43%, signal=106%
												464	GOBP_HEART_MORPHOGENESIS	290	-0.4	-1.28	0.001	0.658	1	5939	tags=43%, list=31%, signal=61%
												465	GOBP_REGULATION_OF_BLOOD_VESSEL_ENDOTHELIAL_CELL_MIGRATION	95	-0.42	-1.28	0.052	0.657	1	5261	tags=44%, list=27%, signal=61%
												466	GOBP_ENDOPLASMIC_RETICULUM_UNFOLDED_PROTEIN_RESPONSE	70	-0.43	-1.28	0.062	0.657	1	8560	tags=67%, list=45%, signal=121%
												467	GOBP_REGULATION_OF_PROTEIN_LOCALIZATION_TO_NUCLEUS	160	-0.41	-1.28	0.018	0.658	1	5034	tags=37%, list=26%, signal=50%
												468	GOBP_EPIDERMIS_MORPHOGENESIS	42	-0.45	-1.28	0.076	0.66	1	5997	tags=50%, list=31%, signal=73%
												469	GOBP_REGULATION_OF_PHOSPHOLIPID_METABOLIC_PROCESS	39	-0.46	-1.28	0.086	0.66	1	4058	tags=41%, list=21%, signal=52%
												470	GOBP_PHOSPHOLIPID_TRANSPORT	89	-0.43	-1.28	0.035	0.659	1	5557	tags=46%, list=29%, signal=65%
												471	GOBP_CELLULAR_RESPONSE_TO_TOPOLOGICALLY_INCORRECT_PROTEIN	102	-0.42	-1.28	0.038	0.658	1	8560	tags=63%, list=45%, signal=113%
												472	GOBP_RIG_I_SIGNALING_PATHWAY	24	-0.49	-1.28	0.124	0.659	1	2497	tags=29%, list=13%, signal=33%
												473	GOBP_CYCLIC_NUCLEOTIDE_BIOSYNTHETIC_PROCESS	22	-0.5	-1.28	0.103	0.659	1	5150	tags=50%, list=27%, signal=68%
												474	GOBP_NEUROBLAST_DIVISION	16	-0.54	-1.28	0.139	0.66	1	5298	tags=56%, list=28%, signal=78%
												475	GOBP_PSEUDOPODIUM_ORGANIZATION	15	-0.53	-1.28	0.131	0.663	1	4916	tags=53%, list=26%, signal=72%
												476	GOBP_REGULATION_OF_HEART_RATE	108	-0.42	-1.27	0.032	0.665	1	6031	tags=42%, list=31%, signal=60%
												477	GOBP_REGULATION_OF_URINE_VOLUME	27	-0.49	-1.27	0.116	0.664	1	3363	tags=37%, list=18%, signal=45%
												478	GOBP_ACETYL_COA_BIOSYNTHETIC_PROCESS	19	-0.52	-1.27	0.13	0.663	1	7384	tags=63%, list=39%, signal=103%
												479	GOBP_MONOATOMIC_ANION_HOMEOSTASIS	27	-0.48	-1.27	0.121	0.664	1	1928	tags=26%, list=10%, signal=29%
												480	GOBP_CARDIAC_RIGHT_VENTRICLE_MORPHOGENESIS	20	-0.5	-1.27	0.132	0.67	1	7337	tags=60%, list=38%, signal=97%
												481	GOBP_MESODERM_DEVELOPMENT	121	-0.41	-1.27	0.031	0.671	1	7694	tags=59%, list=40%, signal=97%
												482	GOBP_REGULATION_OF_CARDIAC_MUSCLE_CELL_PROLIFERATION	49	-0.44	-1.27	0.085	0.671	1	6454	tags=51%, list=34%, signal=77%
												483	GOBP_POSITIVE_REGULATION_OF_PROTEIN_LOCALIZATION_TO_NUCLEUS	101	-0.42	-1.27	0.038	0.671	1	5034	tags=36%, list=26%, signal=48%
												484	GOBP_NEUROENDOCRINE_CELL_DIFFERENTIATION	16	-0.52	-1.27	0.137	0.671	1	1945	tags=31%, list=10%, signal=35%
												485	GOBP_POSITIVE_REGULATION_OF_MITOCHONDRIAL_FISSION	22	-0.49	-1.27	0.128	0.672	1	5146	tags=45%, list=27%, signal=62%
												486	GOBP_PULMONARY_VALVE_DEVELOPMENT	23	-0.5	-1.27	0.125	0.672	1	7752	tags=65%, list=40%, signal=109%
												487	GOBP_NEGATIVE_REGULATION_OF_PEPTIDE_SECRETION	71	-0.43	-1.27	0.054	0.671	1	4113	tags=31%, list=21%, signal=39%
												488	GOBP_RELEASE_OF_SEQUESTERED_CALCIUM_ION_INTO_CYTOSOL_BY_ENDOPLASMIC_RETICULUM	23	-0.49	-1.27	0.129	0.672	1	3764	tags=35%, list=20%, signal=43%
												489	GOBP_POSITIVE_REGULATION_OF_T_CELL_MEDIATED_IMMUNITY	59	-0.43	-1.27	0.061	0.672	1	3359	tags=31%, list=18%, signal=37%
												490	GOBP_RNA_METHYLATION	71	-0.42	-1.27	0.067	0.672	1	4946	tags=37%, list=26%, signal=49%
												491	GOBP_REGULATION_OF_DIGESTIVE_SYSTEM_PROCESS	46	-0.44	-1.27	0.084	0.672	1	1306	tags=17%, list=7%, signal=19%
												492	GOBP_VIRAL_RELEASE_FROM_HOST_CELL	23	-0.49	-1.27	0.134	0.672	1	3619	tags=43%, list=19%, signal=54%
												493	GOBP_GTP_METABOLIC_PROCESS	24	-0.5	-1.27	0.118	0.671	1	6574	tags=63%, list=34%, signal=95%
												494	GOBP_BASEMENT_MEMBRANE_ORGANIZATION	40	-0.46	-1.27	0.084	0.672	1	5939	tags=58%, list=31%, signal=83%
												495	GOBP_INTRACELLULAR_ZINC_ION_HOMEOSTASIS	28	-0.48	-1.27	0.116	0.673	1	3900	tags=32%, list=20%, signal=40%
												496	GOBP_REGULATION_OF_VASCULAR_PERMEABILITY	46	-0.44	-1.27	0.106	0.672	1	5205	tags=52%, list=27%, signal=71%
												497	GOBP_DEOXYRIBONUCLEOTIDE_METABOLIC_PROCESS	47	-0.45	-1.27	0.103	0.672	1	7109	tags=64%, list=37%, signal=101%
												498	GOBP_REGULATION_OF_INFLAMMATORY_RESPONSE_TO_ANTIGENIC_STIMULUS	43	-0.45	-1.27	0.088	0.673	1	3387	tags=33%, list=18%, signal=39%
												499	GOBP_GASTRULATION	183	-0.4	-1.27	0.016	0.673	1	8035	tags=60%, list=42%, signal=102%
												500	GOBP_BIOGENIC_AMINE_METABOLIC_PROCESS	106	-0.41	-1.27	0.057	0.673	1	6144	tags=42%, list=32%, signal=61%
												501	GOBP_POTASSIUM_ION_EXPORT_ACROSS_PLASMA_MEMBRANE	19	-0.5	-1.27	0.136	0.673	1	5661	tags=47%, list=30%, signal=67%
												502	GOBP_NCRNA_CATABOLIC_PROCESS	44	-0.45	-1.27	0.099	0.672	1	7763	tags=57%, list=40%, signal=95%
												503	GOBP_ADULT_HEART_DEVELOPMENT	16	-0.52	-1.27	0.138	0.673	1	6106	tags=44%, list=32%, signal=64%
												504	GOBP_PYRIMIDINE_NUCLEOSIDE_TRIPHOSPHATE_METABOLIC_PROCESS	19	-0.5	-1.27	0.156	0.672	1	6940	tags=63%, list=36%, signal=99%
												505	GOBP_NEGATIVE_REGULATION_OF_NON_CANONICAL_NF_KAPPAB_SIGNAL_TRANSDUCTION	26	-0.48	-1.27	0.134	0.678	1	5261	tags=46%, list=27%, signal=64%
												506	GOBP_REGULATION_OF_STEROL_TRANSPORT	65	-0.43	-1.27	0.071	0.68	1	5931	tags=49%, list=31%, signal=71%
												507	GOBP_CELLULAR_RESPONSE_TO_UV	93	-0.42	-1.27	0.043	0.679	1	8837	tags=61%, list=46%, signal=113%
												508	GOBP_SECRETORY_GRANULE_ORGANIZATION	67	-0.43	-1.26	0.064	0.679	1	3115	tags=30%, list=16%, signal=36%
												509	GOBP_NEGATIVE_REGULATION_OF_CELLULAR_CATABOLIC_PROCESS	193	-0.4	-1.26	0.011	0.678	1	6568	tags=51%, list=34%, signal=77%
												510	GOBP_PHOSPHATIDIC_ACID_METABOLIC_PROCESS	27	-0.48	-1.26	0.117	0.678	1	6083	tags=52%, list=32%, signal=76%
												511	GOBP_CELLULAR_OXIDANT_DETOXIFICATION	29	-0.48	-1.26	0.113	0.677	1	8092	tags=76%, list=42%, signal=131%
												512	GOBP_GLUCOSE_METABOLIC_PROCESS	211	-0.4	-1.26	0.011	0.677	1	6324	tags=43%, list=33%, signal=64%
												513	GOBP_POSITIVE_REGULATION_OF_BLOOD_VESSEL_ENDOTHELIAL_CELL_MIGRATION	57	-0.44	-1.26	0.092	0.676	1	5261	tags=46%, list=27%, signal=63%
												514	GOBP_REGULATION_OF_KERATINOCYTE_DIFFERENTIATION	35	-0.46	-1.26	0.104	0.677	1	1229	tags=23%, list=6%, signal=24%
												515	GOBP_CARDIAC_CHAMBER_MORPHOGENESIS	149	-0.41	-1.26	0.03	0.683	1	6035	tags=44%, list=31%, signal=63%
												516	GOBP_REGULATION_OF_GLUCOSE_METABOLIC_PROCESS	114	-0.41	-1.26	0.031	0.684	1	7697	tags=55%, list=40%, signal=92%
												517	GOBP_INTESTINAL_EPITHELIAL_CELL_DEVELOPMENT	20	-0.5	-1.26	0.133	0.683	1	3431	tags=40%, list=18%, signal=49%
												518	GOBP_REGULATION_OF_INSULIN_LIKE_GROWTH_FACTOR_RECEPTOR_SIGNALING_PATHWAY	25	-0.48	-1.26	0.12	0.681	1	3555	tags=44%, list=19%, signal=54%
												519	GOBP_CYTOCHROME_COMPLEX_ASSEMBLY	30	-0.47	-1.26	0.121	0.68	1	4588	tags=47%, list=24%, signal=61%
												520	GOBP_REGULATION_OF_GLUCONEOGENESIS	55	-0.43	-1.26	0.091	0.687	1	7345	tags=58%, list=38%, signal=94%
												521	GOBP_VACUOLE_ORGANIZATION	217	-0.4	-1.26	0.009	0.686	1	8733	tags=66%, list=46%, signal=120%
												522	GOBP_CARDIAC_MUSCLE_CONTRACTION	129	-0.41	-1.26	0.024	0.688	1	8066	tags=54%, list=42%, signal=93%
												523	GOBP_GLOMERULAR_EPITHELIUM_DEVELOPMENT	19	-0.5	-1.26	0.156	0.69	1	6574	tags=53%, list=34%, signal=80%
												524	GOBP_MITOCHONDRION_DISTRIBUTION	25	-0.48	-1.26	0.12	0.69	1	4715	tags=44%, list=25%, signal=58%
												525	GOBP_RADIAL_GLIAL_CELL_DIFFERENTIATION	18	-0.51	-1.26	0.152	0.689	1	3281	tags=39%, list=17%, signal=47%
												526	GOBP_REGULATION_OF_DEFENSE_RESPONSE_TO_VIRUS_BY_HOST	45	-0.45	-1.26	0.101	0.688	1	3765	tags=33%, list=20%, signal=41%
												527	GOBP_RESPONSE_TO_INTERLEUKIN_17	25	-0.48	-1.26	0.136	0.688	1	4450	tags=44%, list=23%, signal=57%
												528	GOBP_REGULATION_OF_PROTEIN_IMPORT_INTO_NUCLEUS	78	-0.43	-1.26	0.057	0.688	1	7192	tags=51%, list=38%, signal=82%
												529	GOBP_CELL_VOLUME_HOMEOSTASIS	39	-0.45	-1.26	0.116	0.688	1	4366	tags=38%, list=23%, signal=50%
												530	GOBP_REGULATION_OF_HISTONE_MODIFICATION	43	-0.45	-1.26	0.109	0.687	1	4414	tags=42%, list=23%, signal=54%
												531	GOBP_CARBOHYDRATE_DERIVATIVE_TRANSPORT	73	-0.42	-1.26	0.066	0.686	1	7473	tags=58%, list=39%, signal=94%
												532	GOBP_PLASMA_LIPOPROTEIN_PARTICLE_ASSEMBLY	20	-0.5	-1.26	0.141	0.689	1	1106	tags=25%, list=6%, signal=27%
												533	GOBP_REGULATION_OF_CALCIUM_ION_IMPORT	33	-0.46	-1.26	0.115	0.688	1	4418	tags=30%, list=23%, signal=39%
												534	GOBP_RESPONSE_TO_COLD	45	-0.44	-1.26	0.098	0.687	1	5531	tags=44%, list=29%, signal=62%
												535	GOBP_ENDOTHELIAL_CELL_PROLIFERATION	170	-0.4	-1.26	0.021	0.687	1	6344	tags=48%, list=33%, signal=71%
												536	GOBP_CELL_PROLIFERATION_INVOLVED_IN_HEART_MORPHOGENESIS	23	-0.49	-1.26	0.14	0.685	1	8708	tags=65%, list=45%, signal=119%
												537	GOBP_RESPONSE_TO_UV	155	-0.4	-1.26	0.026	0.684	1	8837	tags=61%, list=46%, signal=113%
												538	GOBP_DEFENSE_RESPONSE_TO_SYMBIONT	290	-0.4	-1.26	0.005	0.684	1	3936	tags=31%, list=21%, signal=39%
												539	GOBP_REGULATION_OF_ENDOCRINE_PROCESS	55	-0.44	-1.26	0.095	0.683	1	2706	tags=29%, list=14%, signal=34%
												540	GOBP_CARDIAC_MUSCLE_CELL_ACTION_POTENTIAL	59	-0.43	-1.26	0.084	0.682	1	8028	tags=61%, list=42%, signal=105%
												541	GOBP_GLYCEROPHOSPHOLIPID_BIOSYNTHETIC_PROCESS	165	-0.4	-1.26	0.018	0.681	1	6093	tags=47%, list=32%, signal=68%
												542	GOBP_AUTOPHAGY_OF_MITOCHONDRION	89	-0.41	-1.26	0.059	0.682	1	6030	tags=48%, list=31%, signal=70%
												543	GOBP_GLYCOPROTEIN_CATABOLIC_PROCESS	32	-0.46	-1.26	0.127	0.683	1	6313	tags=53%, list=33%, signal=79%
												544	GOBP_REGULATION_OF_CARBOHYDRATE_BIOSYNTHETIC_PROCESS	111	-0.41	-1.26	0.034	0.685	1	6266	tags=47%, list=33%, signal=69%
												545	GOBP_RESPONSE_TO_MAGNESIUM_ION	16	-0.52	-1.26	0.123	0.685	1	8881	tags=69%, list=46%, signal=128%
												546	GOBP_PYRIMIDINE_NUCLEOTIDE_METABOLIC_PROCESS	40	-0.44	-1.26	0.113	0.686	1	6037	tags=50%, list=31%, signal=73%
												547	GOBP_SMOOTH_MUSCLE_CELL_DIFFERENTIATION	79	-0.43	-1.26	0.05	0.685	1	4513	tags=38%, list=24%, signal=49%
												548	GOBP_CELL_FATE_COMMITMENT_INVOLVED_IN_FORMATION_OF_PRIMARY_GERM_LAYER	31	-0.47	-1.26	0.139	0.684	1	4065	tags=32%, list=21%, signal=41%
												549	GOBP_COLLAGEN_FIBRIL_ORGANIZATION	59	-0.43	-1.26	0.088	0.683	1	8092	tags=61%, list=42%, signal=105%
												550	GOBP_CARBOHYDRATE_DERIVATIVE_CATABOLIC_PROCESS	159	-0.4	-1.26	0.015	0.682	1	6436	tags=48%, list=34%, signal=71%
												551	GOBP_PROTEIN_KINASE_C_SIGNALING	37	-0.46	-1.25	0.114	0.682	1	5964	tags=51%, list=31%, signal=74%
												552	GOBP_PSEUDOURIDINE_SYNTHESIS	18	-0.51	-1.25	0.144	0.681	1	7631	tags=72%, list=40%, signal=120%
												553	GOBP_GROWTH_HORMONE_SECRETION	22	-0.49	-1.25	0.137	0.68	1	4484	tags=41%, list=23%, signal=53%
												554	GOBP_GLYCERALDEHYDE_3_PHOSPHATE_METABOLIC_PROCESS	16	-0.52	-1.25	0.146	0.68	1	5839	tags=50%, list=30%, signal=72%
												555	GOBP_PHASIC_SMOOTH_MUSCLE_CONTRACTION	29	-0.47	-1.25	0.12	0.68	1	1994	tags=21%, list=10%, signal=23%
												556	GOBP_REGULATION_OF_RESPIRATORY_SYSTEM_PROCESS	16	-0.52	-1.25	0.149	0.68	1	6480	tags=56%, list=34%, signal=85%
												557	GOBP_PROTEIN_LOCALIZATION_TO_PHAGOPHORE_ASSEMBLY_SITE	16	-0.52	-1.25	0.14	0.68	1	8174	tags=88%, list=43%, signal=152%
												558	GOBP_ENDOTHELIAL_CELL_APOPTOTIC_PROCESS	60	-0.43	-1.25	0.084	0.681	1	4152	tags=35%, list=22%, signal=45%
												559	GOBP_SNRNA_METABOLIC_PROCESS	51	-0.44	-1.25	0.094	0.68	1	7763	tags=63%, list=40%, signal=105%
												560	GOBP_REGULATION_OF_LIPOPROTEIN_METABOLIC_PROCESS	19	-0.5	-1.25	0.16	0.682	1	5667	tags=58%, list=30%, signal=82%
												561	GOBP_NEGATIVE_REGULATION_OF_EPITHELIAL_CELL_MIGRATION	73	-0.42	-1.25	0.061	0.682	1	6015	tags=48%, list=31%, signal=70%
												562	GOBP_LIPOPROTEIN_METABOLIC_PROCESS	135	-0.4	-1.25	0.034	0.683	1	5180	tags=41%, list=27%, signal=56%
												563	GOBP_MITOCHONDRIAL_FUSION	32	-0.46	-1.25	0.125	0.682	1	8770	tags=78%, list=46%, signal=144%
												564	GOBP_POSITIVE_REGULATION_OF_POST_TRANSLATIONAL_PROTEIN_MODIFICATION	168	-0.4	-1.25	0.014	0.682	1	6996	tags=50%, list=36%, signal=78%
												565	GOBP_PLASMA_LIPOPROTEIN_PARTICLE_CLEARANCE	37	-0.45	-1.25	0.128	0.682	1	5793	tags=54%, list=30%, signal=77%
												566	GOBP_CELLULAR_RESPONSE_TO_HYDROGEN_PEROXIDE	62	-0.43	-1.25	0.082	0.684	1	7638	tags=53%, list=40%, signal=88%
												567	GOBP_PHOSPHATE_ION_TRANSPORT	28	-0.47	-1.25	0.141	0.688	1	3630	tags=32%, list=19%, signal=40%
												568	GOBP_ENDOPLASMIC_RETICULUM_ORGANIZATION	93	-0.41	-1.25	0.062	0.687	1	9503	tags=71%, list=50%, signal=140%
												569	GOBP_REGULATION_OF_EXTRACELLULAR_MATRIX_ASSEMBLY	17	-0.51	-1.25	0.151	0.688	1	3025	tags=47%, list=16%, signal=56%
												570	GOBP_LIPOPROTEIN_BIOSYNTHETIC_PROCESS	101	-0.41	-1.25	0.06	0.689	1	5180	tags=42%, list=27%, signal=57%
												571	GOBP_REGULATION_OF_PROTEASOMAL_UBIQUITIN_DEPENDENT_PROTEIN_CATABOLIC_PROCESS	135	-0.4	-1.25	0.037	0.689	1	9503	tags=73%, list=50%, signal=144%
												572	GOBP_URETER_DEVELOPMENT	20	-0.49	-1.25	0.157	0.688	1	2364	tags=35%, list=12%, signal=40%
												573	GOBP_CELLULAR_RESPONSE_TO_GLUCOSE_STARVATION	50	-0.44	-1.25	0.096	0.688	1	8814	tags=70%, list=46%, signal=129%
												574	GOBP_INORGANIC_ANION_TRANSMEMBRANE_TRANSPORT	89	-0.41	-1.25	0.057	0.687	1	3630	tags=33%, list=19%, signal=40%
												575	GOBP_DNA_TEMPLATED_DNA_REPLICATION	146	-0.4	-1.25	0.024	0.691	1	5132	tags=42%, list=27%, signal=58%
												576	GOBP_PYRIMIDINE_CONTAINING_COMPOUND_METABOLIC_PROCESS	63	-0.43	-1.25	0.091	0.692	1	6037	tags=49%, list=31%, signal=72%
												577	GOBP_MIDBRAIN_DEVELOPMENT	48	-0.44	-1.25	0.11	0.691	1	5298	tags=42%, list=28%, signal=57%
												578	GOBP_SNO_S_RNA_METABOLIC_PROCESS	19	-0.5	-1.25	0.157	0.691	1	7131	tags=53%, list=37%, signal=84%
												579	GOBP_PHOSPHOLIPID_BIOSYNTHETIC_PROCESS	219	-0.39	-1.25	0.009	0.691	1	8710	tags=64%, list=45%, signal=116%
												580	GOBP_POSITIVE_REGULATION_OF_CELL_KILLING	75	-0.42	-1.25	0.087	0.694	1	3359	tags=24%, list=18%, signal=29%
												581	GOBP_BRANCHED_CHAIN_AMINO_ACID_CATABOLIC_PROCESS	20	-0.5	-1.25	0.168	0.693	1	8539	tags=75%, list=45%, signal=135%
												582	GOBP_DORSAL_VENTRAL_NEURAL_TUBE_PATTERNING	33	-0.46	-1.25	0.136	0.692	1	7134	tags=55%, list=37%, signal=87%
												583	GOBP_ORGANIC_ACID_CATABOLIC_PROCESS	231	-0.4	-1.25	0.013	0.691	1	7461	tags=53%, list=39%, signal=85%
												584	GOBP_PULMONARY_VALVE_MORPHOGENESIS	19	-0.5	-1.25	0.161	0.691	1	7752	tags=63%, list=40%, signal=106%
												585	GOBP_CARDIAC_CHAMBER_DEVELOPMENT	197	-0.39	-1.25	0.021	0.694	1	6074	tags=44%, list=32%, signal=63%
												586	GOBP_CELLULAR_RESPONSE_TO_NUTRIENT	37	-0.45	-1.25	0.128	0.693	1	4896	tags=43%, list=26%, signal=58%
												587	GOBP_REGULATION_OF_CYTOPLASMIC_TRANSPORT	31	-0.46	-1.25	0.133	0.693	1	7275	tags=71%, list=38%, signal=114%
												588	GOBP_ANIMAL_ORGAN_FORMATION	76	-0.42	-1.25	0.079	0.694	1	5863	tags=41%, list=31%, signal=59%
												589	GOBP_NECROPTOTIC_PROCESS	37	-0.45	-1.25	0.138	0.693	1	5264	tags=49%, list=27%, signal=67%
												590	GOBP_INTERNAL_PROTEIN_AMINO_ACID_ACETYLATION	66	-0.42	-1.25	0.099	0.692	1	7263	tags=55%, list=38%, signal=87%
												591	GOBP_ENDONUCLEOLYTIC_CLEAVAGE_OF_TRICISTRONIC_RRNA_TRANSCRIPT_SSU_RRNA_5_8S_RRNA_LSU_RRNA	16	-0.51	-1.25	0.161	0.691	1	5780	tags=56%, list=30%, signal=80%
												592	GOBP_REGULATION_OF_PROTEIN_LOCALIZATION_TO_CELL_SURFACE	44	-0.44	-1.25	0.137	0.69	1	3854	tags=34%, list=20%, signal=43%
												593	GOBP_PEPTIDYL_LYSINE_MODIFICATION	217	-0.39	-1.25	0.02	0.689	1	7762	tags=59%, list=40%, signal=97%
												594	GOBP_SARCOMERE_ORGANIZATION	49	-0.43	-1.24	0.101	0.691	1	6765	tags=49%, list=35%, signal=75%
												595	GOBP_POSITIVE_REGULATION_OF_PROTEIN_UBIQUITINATION	111	-0.41	-1.24	0.05	0.693	1	5010	tags=39%, list=26%, signal=52%
												596	GOBP_PRIMARY_MIRNA_PROCESSING	17	-0.51	-1.24	0.148	0.692	1	7265	tags=65%, list=38%, signal=104%
												597	GOBP_REGULATION_OF_SODIUM_ION_TRANSMEMBRANE_TRANSPORT	70	-0.42	-1.24	0.086	0.692	1	8064	tags=56%, list=42%, signal=96%
												598	GOBP_RESPIRATORY_CHAIN_COMPLEX_IV_ASSEMBLY	21	-0.49	-1.24	0.159	0.694	1	3845	tags=43%, list=20%, signal=54%
												599	GOBP_PROTEIN_DEMETHYLATION	17	-0.5	-1.24	0.162	0.694	1	6239	tags=65%, list=33%, signal=96%
												600	GOBP_REGULATION_OF_CALCIUM_ION_TRANSMEMBRANE_TRANSPORTER_ACTIVITY	85	-0.41	-1.24	0.072	0.693	1	8073	tags=55%, list=42%, signal=95%
												601	GOBP_PROTEIN_QUALITY_CONTROL_FOR_MISFOLDED_OR_INCOMPLETELY_SYNTHESIZED_PROTEINS	28	-0.47	-1.24	0.137	0.695	1	7834	tags=64%, list=41%, signal=109%
												602	GOBP_ONE_CARBON_METABOLIC_PROCESS	39	-0.45	-1.24	0.135	0.697	1	5220	tags=41%, list=27%, signal=56%
												603	GOBP_EXTRACELLULAR_VESICLE_BIOGENESIS	24	-0.48	-1.24	0.146	0.699	1	6777	tags=63%, list=35%, signal=97%
												604	GOBP_NEGATIVE_REGULATION_OF_DNA_TEMPLATED_TRANSCRIPTION_ELONGATION	18	-0.5	-1.24	0.136	0.702	1	8370	tags=78%, list=44%, signal=138%
												605	GOBP_REGULATION_OF_NUCLEASE_ACTIVITY	25	-0.48	-1.24	0.149	0.701	1	6463	tags=48%, list=34%, signal=72%
												606	GOBP_POSITIVE_REGULATION_OF_LEUKOCYTE_DEGRANULATION	33	-0.46	-1.24	0.133	0.703	1	1991	tags=30%, list=10%, signal=34%
												607	GOBP_RESPONSE_TO_HYDROGEN_PEROXIDE	92	-0.41	-1.24	0.061	0.702	1	7113	tags=50%, list=37%, signal=79%
												608	GOBP_REGULATION_OF_CELLULAR_RESPONSE_TO_HYPOXIA	25	-0.47	-1.24	0.155	0.702	1	5555	tags=56%, list=29%, signal=79%
												609	GOBP_RESPONSE_TO_DIETARY_EXCESS	43	-0.44	-1.24	0.138	0.701	1	5501	tags=49%, list=29%, signal=68%
												610	GOBP_MEMBRANE_REPOLARIZATION	48	-0.43	-1.24	0.114	0.701	1	7168	tags=48%, list=37%, signal=76%
												611	GOBP_NEGATIVE_REGULATION_OF_BLOOD_PRESSURE	67	-0.42	-1.24	0.085	0.704	1	5902	tags=43%, list=31%, signal=62%
												612	GOBP_REGULATION_OF_HEART_RATE_BY_CARDIAC_CONDUCTION	36	-0.45	-1.24	0.129	0.703	1	6531	tags=44%, list=34%, signal=67%
												613	GOBP_POSITIVE_REGULATION_OF_RESPONSE_TO_CYTOKINE_STIMULUS	62	-0.42	-1.24	0.101	0.702	1	5001	tags=40%, list=26%, signal=54%
												614	GOBP_ORGANIC_HYDROXY_COMPOUND_TRANSPORT	304	-0.39	-1.24	0.008	0.702	1	5951	tags=41%, list=31%, signal=59%
												615	GOBP_NEGATIVE_REGULATION_OF_GLIOGENESIS	59	-0.43	-1.24	0.115	0.702	1	4357	tags=36%, list=23%, signal=46%
												616	GOBP_ACTIN_FILAMENT_BASED_MOVEMENT	127	-0.4	-1.24	0.053	0.706	1	6852	tags=47%, list=36%, signal=73%
												617	GOBP_REGULATION_OF_PROTON_TRANSPORT	30	-0.46	-1.24	0.133	0.706	1	4190	tags=33%, list=22%, signal=43%
												618	GOBP_POSITIVE_REGULATION_OF_PROTEIN_MODIFICATION_BY_SMALL_PROTEIN_CONJUGATION_OR_REMOVAL	136	-0.4	-1.24	0.042	0.711	1	6996	tags=50%, list=36%, signal=78%
												619	GOBP_UBIQUINONE_METABOLIC_PROCESS	19	-0.5	-1.24	0.181	0.711	1	7781	tags=74%, list=41%, signal=124%
												620	GOBP_POLYSACCHARIDE_BIOSYNTHETIC_PROCESS	67	-0.42	-1.24	0.095	0.711	1	6111	tags=46%, list=32%, signal=68%
												621	GOBP_NEGATIVE_REGULATION_OF_DEFENSE_RESPONSE	285	-0.39	-1.24	0.012	0.712	1	5290	tags=35%, list=28%, signal=48%
												622	GOBP_INTEGRATED_STRESS_RESPONSE_SIGNALING	22	-0.48	-1.24	0.169	0.715	1	8444	tags=73%, list=44%, signal=130%
												623	GOBP_ASPARTATE_FAMILY_AMINO_ACID_METABOLIC_PROCESS	40	-0.44	-1.23	0.132	0.716	1	5700	tags=43%, list=30%, signal=60%
												624	GOBP_POSITIVE_REGULATION_OF_DIGESTIVE_SYSTEM_PROCESS	17	-0.51	-1.23	0.163	0.716	1	370	tags=18%, list=2%, signal=18%
												625	GOBP_REGULATION_OF_POTASSIUM_ION_TRANSMEMBRANE_TRANSPORT	94	-0.41	-1.23	0.081	0.715	1	1972	tags=20%, list=10%, signal=22%
												626	GOBP_NEGATIVE_REGULATION_OF_PROTEIN_IMPORT_INTO_NUCLEUS	18	-0.5	-1.23	0.172	0.715	1	7192	tags=61%, list=38%, signal=98%
												627	GOBP_MRNA_EXPORT_FROM_NUCLEUS	61	-0.42	-1.23	0.109	0.715	1	5777	tags=46%, list=30%, signal=65%
												628	GOBP_REGULATION_OF_VIRAL_GENOME_REPLICATION	80	-0.41	-1.23	0.065	0.716	1	3375	tags=33%, list=18%, signal=39%
												629	GOBP_POSITIVE_REGULATION_OF_CELL_MIGRATION_INVOLVED_IN_SPROUTING_ANGIOGENESIS	21	-0.48	-1.23	0.167	0.715	1	5261	tags=43%, list=27%, signal=59%
												630	GOBP_REGULATION_OF_EMBRYONIC_DEVELOPMENT	90	-0.41	-1.23	0.067	0.715	1	8129	tags=57%, list=42%, signal=98%
												631	GOBP_POSITIVE_REGULATION_OF_CALCIUM_ION_IMPORT_ACROSS_PLASMA_MEMBRANE	16	-0.51	-1.23	0.169	0.714	1	6112	tags=63%, list=32%, signal=92%
												632	GOBP_REGULATION_OF_FATTY_ACID_METABOLIC_PROCESS	109	-0.4	-1.23	0.07	0.715	1	3793	tags=30%, list=20%, signal=38%
												633	GOBP_SEMI_LUNAR_VALVE_DEVELOPMENT	40	-0.44	-1.23	0.133	0.715	1	7752	tags=63%, list=40%, signal=105%
												634	GOBP_CELLULAR_RESPONSE_TO_CHOLESTEROL	17	-0.51	-1.23	0.168	0.716	1	3565	tags=41%, list=19%, signal=51%
												635	GOBP_REGULATION_OF_FATTY_ACID_OXIDATION	45	-0.44	-1.23	0.126	0.717	1	4090	tags=36%, list=21%, signal=45%
												636	GOBP_PROTEIN_DEACETYLATION	64	-0.42	-1.23	0.095	0.717	1	8263	tags=61%, list=43%, signal=107%
												637	GOBP_RRNA_TRANSCRIPTION	34	-0.45	-1.23	0.159	0.72	1	8628	tags=62%, list=45%, signal=112%
												638	GOBP_PRE_MIRNA_PROCESSING	16	-0.51	-1.23	0.179	0.721	1	4003	tags=44%, list=21%, signal=55%
												639	GOBP_AUTOPHAGOSOME_MATURATION	52	-0.43	-1.23	0.117	0.72	1	5195	tags=50%, list=27%, signal=68%
												640	GOBP_PROTEIN_HYDROXYLATION	27	-0.47	-1.23	0.15	0.719	1	9111	tags=85%, list=48%, signal=162%
												641	GOBP_MULTICELLULAR_ORGANISMAL_LEVEL_IRON_ION_HOMEOSTASIS	30	-0.46	-1.23	0.164	0.719	1	5618	tags=50%, list=29%, signal=71%
												642	GOBP_NEGATIVE_REGULATION_OF_TOLL_LIKE_RECEPTOR_SIGNALING_PATHWAY	18	-0.5	-1.23	0.186	0.718	1	2172	tags=33%, list=11%, signal=38%
												643	GOBP_QUINONE_BIOSYNTHETIC_PROCESS	17	-0.51	-1.23	0.164	0.718	1	7781	tags=76%, list=41%, signal=129%
												644	GOBP_POSITIVE_REGULATION_OF_SMOOTH_MUSCLE_CELL_MIGRATION	67	-0.42	-1.23	0.102	0.717	1	8667	tags=57%, list=45%, signal=103%
												645	GOBP_REGULATION_OF_STRIATED_MUSCLE_CONTRACTION	84	-0.41	-1.23	0.084	0.717	1	9129	tags=65%, list=48%, signal=124%
												646	GOBP_PROCESS_UTILIZING_AUTOPHAGIC_MECHANISM	484	-0.38	-1.23	0.002	0.719	1	8192	tags=60%, list=43%, signal=102%
												647	GOBP_LYMPHOCYTE_COSTIMULATION	33	-0.46	-1.23	0.146	0.72	1	2912	tags=30%, list=15%, signal=36%
												648	GOBP_CELLULAR_RESPONSE_TO_LIPOPROTEIN_PARTICLE_STIMULUS	33	-0.45	-1.23	0.151	0.722	1	5181	tags=48%, list=27%, signal=66%
												649	GOBP_DIET_INDUCED_THERMOGENESIS	16	-0.51	-1.23	0.163	0.721	1	5501	tags=56%, list=29%, signal=79%
												650	GOBP_ESTABLISHMENT_OF_SKIN_BARRIER	36	-0.44	-1.23	0.152	0.721	1	2231	tags=28%, list=12%, signal=31%
												651	GOBP_RESPONSE_TO_CHOLESTEROL	23	-0.47	-1.23	0.171	0.721	1	3565	tags=35%, list=19%, signal=43%
												652	GOBP_MAMMARY_GLAND_MORPHOGENESIS	60	-0.42	-1.23	0.12	0.722	1	7190	tags=55%, list=37%, signal=88%
												653	GOBP_SULFUR_COMPOUND_BIOSYNTHETIC_PROCESS	115	-0.4	-1.23	0.064	0.721	1	8124	tags=59%, list=42%, signal=102%
												654	GOBP_ATP_TRANSPORT	19	-0.49	-1.23	0.163	0.723	1	6106	tags=53%, list=32%, signal=77%
												655	GOBP_TRNA_CATABOLIC_PROCESS	15	-0.52	-1.23	0.165	0.722	1	4611	tags=40%, list=24%, signal=53%
												656	GOBP_PROTEIN_TRANSMEMBRANE_IMPORT_INTO_INTRACELLULAR_ORGANELLE	35	-0.45	-1.23	0.145	0.721	1	5858	tags=46%, list=31%, signal=66%
												657	GOBP_POSITIVE_REGULATION_OF_VIRAL_PROCESS	66	-0.42	-1.23	0.1	0.72	1	6211	tags=44%, list=32%, signal=65%
												658	GOBP_GAS_TRANSPORT	18	-0.49	-1.23	0.184	0.719	1	5402	tags=39%, list=28%, signal=54%
												659	GOBP_MYOBLAST_FUSION	49	-0.43	-1.23	0.137	0.719	1	3048	tags=31%, list=16%, signal=36%
												660	GOBP_EXTRACELLULAR_MATRIX_ASSEMBLY	43	-0.43	-1.23	0.139	0.718	1	4375	tags=40%, list=23%, signal=51%
												661	GOBP_DOUBLE_STRAND_BREAK_REPAIR_VIA_NONHOMOLOGOUS_END_JOINING	62	-0.42	-1.23	0.122	0.72	1	5134	tags=40%, list=27%, signal=55%
												662	GOBP_INNATE_IMMUNE_RESPONSE_IN_MUCOSA	19	-0.5	-1.23	0.174	0.719	1	719	tags=16%, list=4%, signal=16%
												663	GOBP_NEGATIVE_REGULATION_OF_TORC1_SIGNALING	38	-0.44	-1.23	0.16	0.718	1	8931	tags=74%, list=47%, signal=138%
												664	GOBP_POSITIVE_REGULATION_OF_OSTEOBLAST_DIFFERENTIATION	73	-0.41	-1.23	0.097	0.718	1	6132	tags=47%, list=32%, signal=68%
												665	GOBP_REGULATION_OF_PROTEIN_CATABOLIC_PROCESS	356	-0.38	-1.23	0.005	0.719	1	7969	tags=56%, list=42%, signal=95%
												666	GOBP_POSITIVE_REGULATION_OF_INTERFERON_BETA_PRODUCTION	47	-0.43	-1.23	0.134	0.718	1	5241	tags=43%, list=27%, signal=58%
												667	GOBP_MITOCHONDRION_LOCALIZATION	55	-0.42	-1.23	0.131	0.717	1	5243	tags=44%, list=27%, signal=60%
												668	GOBP_NUCLEAR_ENVELOPE_ORGANIZATION	48	-0.43	-1.23	0.148	0.716	1	8773	tags=73%, list=46%, signal=134%
												669	GOBP_POSITIVE_REGULATION_OF_VASCULAR_ASSOCIATED_SMOOTH_MUSCLE_CELL_MIGRATION	21	-0.48	-1.23	0.177	0.716	1	5141	tags=52%, list=27%, signal=71%
												670	GOBP_REGULATION_OF_TYPE_2_IMMUNE_RESPONSE	34	-0.45	-1.23	0.137	0.716	1	2675	tags=26%, list=14%, signal=31%
												671	GOBP_POSITIVE_REGULATION_OF_BLOOD_CIRCULATION	45	-0.44	-1.23	0.14	0.718	1	2116	tags=24%, list=11%, signal=27%
												672	GOBP_TRANSLATION_AT_SYNAPSE	43	-0.43	-1.22	0.13	0.721	1	4225	tags=30%, list=22%, signal=39%
												673	GOBP_AMINO_ACID_METABOLIC_PROCESS	265	-0.38	-1.22	0.008	0.72	1	6486	tags=44%, list=34%, signal=66%
												674	GOBP_AUDITORY_RECEPTOR_CELL_MORPHOGENESIS	29	-0.45	-1.22	0.17	0.719	1	8495	tags=69%, list=44%, signal=124%
												675	GOBP_PROTEIN_PROCESSING	247	-0.38	-1.22	0.014	0.719	1	5176	tags=37%, list=27%, signal=50%
												676	GOBP_SPLICEOSOMAL_COMPLEX_ASSEMBLY	45	-0.43	-1.22	0.147	0.721	1	7324	tags=53%, list=38%, signal=86%
												677	GOBP_NEURON_PROJECTION_REGENERATION	65	-0.41	-1.22	0.118	0.72	1	9146	tags=68%, list=48%, signal=129%
												678	GOBP_DNA_UNWINDING_INVOLVED_IN_DNA_REPLICATION	20	-0.49	-1.22	0.169	0.719	1	6546	tags=50%, list=34%, signal=76%
												679	GOBP_MATERNAL_PLACENTA_DEVELOPMENT	35	-0.45	-1.22	0.165	0.723	1	8394	tags=60%, list=44%, signal=107%
												680	GOBP_REGULATION_OF_EXOSOMAL_SECRETION	17	-0.5	-1.22	0.193	0.724	1	6478	tags=65%, list=34%, signal=98%
												681	GOBP_PROTEASOME_MEDIATED_UBIQUITIN_DEPENDENT_PROTEIN_CATABOLIC_PROCESS	427	-0.38	-1.22	0	0.724	1	8651	tags=61%, list=45%, signal=108%
												682	GOBP_NUCLEAR_MEMBRANE_ORGANIZATION	32	-0.45	-1.22	0.155	0.724	1	4427	tags=47%, list=23%, signal=61%
												683	GOBP_PEPTIDYL_LYSINE_ACETYLATION	80	-0.4	-1.22	0.105	0.723	1	7263	tags=54%, list=38%, signal=86%
												684	GOBP_IMPORT_INTO_NUCLEUS	181	-0.39	-1.22	0.028	0.724	1	7192	tags=48%, list=38%, signal=76%
												685	GOBP_EMBRYONIC_HEMOPOIESIS	32	-0.45	-1.22	0.158	0.723	1	6801	tags=47%, list=35%, signal=73%
												686	GOBP_CONVERGENT_EXTENSION	15	-0.51	-1.22	0.174	0.725	1	5298	tags=53%, list=28%, signal=74%
												687	GOBP_REGULATION_OF_AUTOPHAGY	286	-0.38	-1.22	0.011	0.724	1	8192	tags=60%, list=43%, signal=103%
												688	GOBP_MYOTUBE_CELL_DEVELOPMENT	47	-0.43	-1.22	0.137	0.723	1	3901	tags=36%, list=20%, signal=45%
												689	GOBP_CARBOHYDRATE_PHOSPHORYLATION	18	-0.5	-1.22	0.187	0.723	1	8804	tags=67%, list=46%, signal=123%
												690	GOBP_MATURATION_OF_SSU_RRNA	47	-0.43	-1.22	0.134	0.722	1	8751	tags=66%, list=46%, signal=121%
												691	GOBP_TRIGLYCERIDE_BIOSYNTHETIC_PROCESS	45	-0.43	-1.22	0.142	0.722	1	3677	tags=36%, list=19%, signal=44%
												692	GOBP_CELL_REDOX_HOMEOSTASIS	30	-0.46	-1.22	0.177	0.723	1	7778	tags=73%, list=41%, signal=123%
												693	GOBP_POSITIVE_REGULATION_OF_RNA_SPLICING	46	-0.43	-1.22	0.151	0.723	1	9264	tags=63%, list=48%, signal=122%
												694	GOBP_GLYCOSYLATION	217	-0.39	-1.22	0.02	0.724	1	7837	tags=56%, list=41%, signal=93%
												695	GOBP_FEMALE_PREGNANCY	158	-0.39	-1.22	0.039	0.724	1	7327	tags=39%, list=38%, signal=63%
												696	GOBP_POSITIVE_REGULATION_OF_MRNA_PROCESSING	35	-0.44	-1.22	0.15	0.724	1	3572	tags=31%, list=19%, signal=39%
												697	GOBP_RENAL_SYSTEM_PROCESS	125	-0.4	-1.22	0.066	0.723	1	6189	tags=40%, list=32%, signal=59%
												698	GOBP_INTERFERON_BETA_PRODUCTION	67	-0.41	-1.22	0.12	0.722	1	5241	tags=42%, list=27%, signal=57%
												699	GOBP_POSITIVE_REGULATION_OF_CARDIAC_MUSCLE_CELL_PROLIFERATION	30	-0.45	-1.22	0.158	0.721	1	5450	tags=47%, list=28%, signal=65%
												700	GOBP_NEGATIVE_REGULATION_OF_NUCLEOCYTOPLASMIC_TRANSPORT	28	-0.46	-1.22	0.179	0.72	1	3334	tags=32%, list=17%, signal=39%
												701	GOBP_MUSCLE_CELL_DEVELOPMENT	221	-0.39	-1.22	0.02	0.72	1	6311	tags=43%, list=33%, signal=64%
												702	GOBP_STRIATED_MUSCLE_CELL_PROLIFERATION	83	-0.41	-1.22	0.106	0.721	1	6454	tags=49%, list=34%, signal=74%
												703	GOBP_GLYCEROL_METABOLIC_PROCESS	21	-0.48	-1.22	0.187	0.72	1	5585	tags=43%, list=29%, signal=60%
												704	GOBP_PROTEIN_REFOLDING	21	-0.47	-1.22	0.188	0.72	1	7484	tags=62%, list=39%, signal=101%
												705	GOBP_RESPONSE_TO_VIRUS	341	-0.38	-1.22	0.008	0.721	1	3936	tags=30%, list=21%, signal=37%
												706	GOBP_PEROXISOMAL_TRANSPORT	24	-0.47	-1.22	0.177	0.72	1	3470	tags=38%, list=18%, signal=46%
												707	GOBP_NEGATIVE_REGULATION_OF_CARDIAC_MUSCLE_CELL_PROLIFERATION	16	-0.5	-1.22	0.182	0.721	1	6454	tags=63%, list=34%, signal=94%
												708	GOBP_ENDOPLASMIC_RETICULUM_TUBULAR_NETWORK_ORGANIZATION	21	-0.49	-1.22	0.17	0.724	1	8077	tags=76%, list=42%, signal=131%
												709	GOBP_NUCLEAR_TRANSCRIBED_MRNA_CATABOLIC_PROCESS_EXONUCLEOLYTIC	17	-0.5	-1.22	0.187	0.725	1	5814	tags=59%, list=30%, signal=84%
												710	GOBP_NEGATIVE_REGULATION_OF_PROTEIN_LOCALIZATION_TO_NUCLEUS	44	-0.43	-1.22	0.144	0.724	1	3666	tags=34%, list=19%, signal=42%
												711	GOBP_REGULATION_OF_RENAL_SYSTEM_PROCESS	23	-0.48	-1.22	0.186	0.723	1	4694	tags=52%, list=24%, signal=69%
												712	GOBP_POSITIVE_CHEMOTAXIS	44	-0.43	-1.22	0.15	0.723	1	5241	tags=39%, list=27%, signal=53%
												713	GOBP_PERIPHERAL_NERVOUS_SYSTEM_DEVELOPMENT	84	-0.41	-1.22	0.086	0.722	1	4130	tags=33%, list=22%, signal=42%
												714	GOBP_PROTEIN_DEACYLATION	76	-0.41	-1.22	0.094	0.722	1	8263	tags=61%, list=43%, signal=106%
												715	GOBP_ORGANELLE_INHERITANCE	15	-0.51	-1.22	0.199	0.722	1	7991	tags=87%, list=42%, signal=148%
												716	GOBP_MITOCHONDRIAL_TRANSLATION	125	-0.4	-1.22	0.077	0.723	1	7191	tags=46%, list=37%, signal=74%
												717	GOBP_PYRIMIDINE_RIBONUCLEOTIDE_BIOSYNTHETIC_PROCESS	17	-0.5	-1.22	0.178	0.723	1	5897	tags=53%, list=31%, signal=76%
												718	GOBP_REGULATION_OF_CELL_KILLING	110	-0.39	-1.22	0.098	0.722	1	3061	tags=22%, list=16%, signal=26%
												719	GOBP_POSITIVE_REGULATION_OF_TYPE_2_IMMUNE_RESPONSE	18	-0.49	-1.22	0.21	0.724	1	1424	tags=22%, list=7%, signal=24%
												720	GOBP_LIPID_MODIFICATION	198	-0.39	-1.22	0.026	0.723	1	8817	tags=62%, list=46%, signal=114%
												721	GOBP_REGULATION_OF_INTRACELLULAR_TRANSPORT	333	-0.38	-1.22	0.01	0.726	1	7437	tags=51%, list=39%, signal=82%
												722	GOBP_MEMBRANE_BIOGENESIS	58	-0.42	-1.21	0.145	0.726	1	3619	tags=33%, list=19%, signal=40%
												723	GOBP_SELECTIVE_AUTOPHAGY	94	-0.4	-1.21	0.085	0.728	1	5313	tags=44%, list=28%, signal=60%
												724	GOBP_POSITIVE_REGULATION_OF_GLYCOGEN_METABOLIC_PROCESS	20	-0.48	-1.21	0.194	0.728	1	5421	tags=50%, list=28%, signal=70%
												725	GOBP_REGULATION_OF_NUCLEOTIDE_METABOLIC_PROCESS	53	-0.42	-1.21	0.147	0.727	1	3281	tags=30%, list=17%, signal=36%
												726	GOBP_RESPONSE_TO_LEPTIN	19	-0.48	-1.21	0.185	0.727	1	7195	tags=58%, list=38%, signal=93%
												727	GOBP_REGULATION_OF_RRNA_PROCESSING	15	-0.51	-1.21	0.19	0.727	1	7365	tags=73%, list=38%, signal=119%
												728	GOBP_MODIFIED_AMINO_ACID_TRANSPORT	46	-0.42	-1.21	0.171	0.726	1	3283	tags=33%, list=17%, signal=39%
												729	GOBP_PROTEIN_POLYUBIQUITINATION	237	-0.38	-1.21	0.017	0.726	1	6597	tags=46%, list=34%, signal=69%
												730	GOBP_VIRAL_BUDDING	17	-0.5	-1.21	0.214	0.727	1	5256	tags=53%, list=27%, signal=73%
												731	GOBP_VESICLE_DOCKING_INVOLVED_IN_EXOCYTOSIS	45	-0.43	-1.21	0.139	0.726	1	7971	tags=67%, list=42%, signal=114%
												732	GOBP_RESPONSE_TO_ESTROGEN	57	-0.41	-1.21	0.134	0.726	1	7866	tags=51%, list=41%, signal=86%
												733	GOBP_POSITIVE_REGULATION_OF_VOLTAGE_GATED_CALCIUM_CHANNEL_ACTIVITY	15	-0.51	-1.21	0.206	0.725	1	4702	tags=33%, list=25%, signal=44%
												734	GOBP_HEART_GROWTH	115	-0.39	-1.21	0.079	0.726	1	6158	tags=44%, list=32%, signal=65%
												735	GOBP_MATURATION_OF_SSU_RRNA_FROM_TRICISTRONIC_RRNA_TRANSCRIPT_SSU_RRNA_5_8S_RRNA_LSU_RRNA	33	-0.44	-1.21	0.171	0.726	1	6055	tags=52%, list=32%, signal=75%
												736	GOBP_NEGATIVE_REGULATION_OF_ACTIN_FILAMENT_BUNDLE_ASSEMBLY	39	-0.44	-1.21	0.166	0.725	1	3604	tags=36%, list=19%, signal=44%
												737	GOBP_NEGATIVE_REGULATION_OF_FEEDING_BEHAVIOR	17	-0.5	-1.21	0.186	0.727	1	3161	tags=29%, list=16%, signal=35%
												738	GOBP_REGULATION_OF_CHOLESTEROL_EFFLUX	39	-0.44	-1.21	0.156	0.726	1	5931	tags=49%, list=31%, signal=70%
												739	GOBP_CELLULAR_METABOLIC_COMPOUND_SALVAGE	34	-0.44	-1.21	0.171	0.727	1	7871	tags=59%, list=41%, signal=100%
												740	GOBP_ATRIOVENTRICULAR_VALVE_DEVELOPMENT	30	-0.45	-1.21	0.168	0.727	1	5902	tags=50%, list=31%, signal=72%
												741	GOBP_NEGATIVE_REGULATION_OF_INSULIN_SECRETION_INVOLVED_IN_CELLULAR_RESPONSE_TO_GLUCOSE_STIMULUS	17	-0.49	-1.21	0.177	0.727	1	7842	tags=59%, list=41%, signal=99%
												742	GOBP_NUCLEOSIDE_MONOPHOSPHATE_METABOLIC_PROCESS	66	-0.41	-1.21	0.124	0.727	1	7601	tags=61%, list=40%, signal=100%
												743	GOBP_CARDIAC_SEPTUM_MORPHOGENESIS	83	-0.4	-1.21	0.106	0.727	1	5924	tags=42%, list=31%, signal=61%
												744	GOBP_AUDITORY_RECEPTOR_CELL_DEVELOPMENT	36	-0.44	-1.21	0.167	0.727	1	7627	tags=58%, list=40%, signal=97%
												745	GOBP_ZINC_ION_TRANSPORT	31	-0.45	-1.21	0.179	0.726	1	7953	tags=61%, list=41%, signal=105%
												746	GOBP_REGULATION_OF_POTASSIUM_ION_TRANSPORT	115	-0.39	-1.21	0.087	0.728	1	1972	tags=20%, list=10%, signal=22%
												747	GOBP_REGULATION_OF_PROTEIN_POLYUBIQUITINATION	29	-0.45	-1.21	0.186	0.728	1	6301	tags=48%, list=33%, signal=72%
												748	GOBP_ENDOSOME_TO_LYSOSOME_TRANSPORT_VIA_MULTIVESICULAR_BODY_SORTING_PATHWAY	16	-0.51	-1.21	0.176	0.728	1	6930	tags=69%, list=36%, signal=108%
												749	GOBP_REGULATION_OF_CHOLESTEROL_BIOSYNTHETIC_PROCESS	20	-0.49	-1.21	0.194	0.728	1	6601	tags=50%, list=34%, signal=76%
												750	GOBP_DETERMINATION_OF_ADULT_LIFESPAN	48	-0.43	-1.21	0.15	0.728	1	8276	tags=63%, list=43%, signal=110%
												751	GOBP_REGULATION_OF_CYSTEINE_TYPE_ENDOPEPTIDASE_ACTIVITY	229	-0.38	-1.21	0.021	0.727	1	5495	tags=39%, list=29%, signal=54%
												752	GOBP_NEGATIVE_REGULATION_OF_CELLULAR_RESPONSE_TO_HYPOXIA	17	-0.5	-1.21	0.196	0.727	1	5303	tags=59%, list=28%, signal=81%
												753	GOBP_RESPONSE_TO_NITRIC_OXIDE	17	-0.5	-1.21	0.194	0.728	1	3479	tags=41%, list=18%, signal=50%
												754	GOBP_GLYCOLIPID_BIOSYNTHETIC_PROCESS	66	-0.41	-1.21	0.125	0.728	1	6354	tags=44%, list=33%, signal=65%
												755	GOBP_POSITIVE_REGULATION_OF_ENDOTHELIAL_CELL_PROLIFERATION	99	-0.4	-1.21	0.1	0.728	1	4032	tags=32%, list=21%, signal=41%
												756	GOBP_TELOMERE_MAINTENANCE_VIA_TELOMERE_LENGTHENING	73	-0.41	-1.21	0.121	0.728	1	8502	tags=60%, list=44%, signal=108%
												757	GOBP_POSITIVE_REGULATION_OF_CYSTEINE_TYPE_ENDOPEPTIDASE_ACTIVITY	143	-0.39	-1.21	0.063	0.731	1	5241	tags=40%, list=27%, signal=54%
												758	GOBP_PROTEOGLYCAN_METABOLIC_PROCESS	89	-0.4	-1.21	0.107	0.73	1	6495	tags=45%, list=34%, signal=68%
												759	GOBP_GLYCEROLIPID_BIOSYNTHETIC_PROCESS	211	-0.38	-1.21	0.048	0.733	1	6148	tags=45%, list=32%, signal=66%
												760	GOBP_REGULATION_OF_AUTOPHAGOSOME_ASSEMBLY	45	-0.43	-1.21	0.147	0.734	1	5696	tags=47%, list=30%, signal=66%
												761	GOBP_ER_NUCLEUS_SIGNALING_PATHWAY	43	-0.43	-1.21	0.146	0.733	1	5769	tags=44%, list=30%, signal=63%
												762	GOBP_ALANINE_TRANSPORT	17	-0.49	-1.21	0.2	0.733	1	3603	tags=47%, list=19%, signal=58%
												763	GOBP_RESPONSE_TO_STARVATION	195	-0.39	-1.21	0.043	0.732	1	9276	tags=65%, list=48%, signal=124%
												764	GOBP_POSITIVE_REGULATION_OF_MONOOXYGENASE_ACTIVITY	28	-0.46	-1.21	0.18	0.732	1	1373	tags=21%, list=7%, signal=23%
												765	GOBP_NUCLEOTIDE_SALVAGE	24	-0.47	-1.21	0.186	0.736	1	7871	tags=71%, list=41%, signal=120%
												766	GOBP_NUCLEAR_MEMBRANE_REASSEMBLY	19	-0.49	-1.21	0.202	0.739	1	9077	tags=89%, list=47%, signal=170%
												767	GOBP_ORGANISM_EMERGENCE_FROM_PROTECTIVE_STRUCTURE	38	-0.43	-1.21	0.175	0.738	1	8263	tags=53%, list=43%, signal=92%
												768	GOBP_REGULATION_OF_RECEPTOR_INTERNALIZATION	82	-0.4	-1.2	0.117	0.739	1	6936	tags=44%, list=36%, signal=68%
												769	GOBP_REGULATION_OF_DNA_DAMAGE_CHECKPOINT	24	-0.47	-1.2	0.191	0.739	1	4247	tags=42%, list=22%, signal=53%
												770	GOBP_POSITIVE_REGULATION_OF_POST_TRANSCRIPTIONAL_GENE_SILENCING	17	-0.48	-1.2	0.202	0.739	1	9265	tags=82%, list=48%, signal=159%
												771	GOBP_REGULATION_OF_PROTEASOMAL_PROTEIN_CATABOLIC_PROCESS	186	-0.38	-1.2	0.045	0.739	1	9361	tags=68%, list=49%, signal=132%
												772	GOBP_REGULATION_OF_HEART_CONTRACTION	193	-0.38	-1.2	0.043	0.74	1	5887	tags=39%, list=31%, signal=56%
												773	GOBP_CELLULAR_COMPONENT_ASSEMBLY_INVOLVED_IN_MORPHOGENESIS	133	-0.39	-1.2	0.053	0.742	1	6765	tags=45%, list=35%, signal=69%
												774	GOBP_POSITIVE_REGULATION_OF_VASCULAR_ASSOCIATED_SMOOTH_MUSCLE_CELL_PROLIFERATION	43	-0.43	-1.2	0.166	0.741	1	4124	tags=40%, list=22%, signal=50%
												775	GOBP_ADENYLATE_CYCLASE_ACTIVATING_G_PROTEIN_COUPLED_RECEPTOR_SIGNALING_PATHWAY	158	-0.39	-1.2	0.059	0.741	1	5526	tags=38%, list=29%, signal=53%
												776	GOBP_PEPTIDYL_ARGININE_MODIFICATION	16	-0.51	-1.2	0.208	0.741	1	7780	tags=63%, list=41%, signal=105%
												777	GOBP_REGULATION_OF_ENDOTHELIAL_CELL_MIGRATION	174	-0.38	-1.2	0.053	0.74	1	6344	tags=44%, list=33%, signal=66%
												778	GOBP_REGULATION_OF_ATP_METABOLIC_PROCESS	28	-0.45	-1.2	0.193	0.74	1	4022	tags=36%, list=21%, signal=45%
												779	GOBP_APOPTOTIC_PROCESS_INVOLVED_IN_MORPHOGENESIS	32	-0.45	-1.2	0.191	0.74	1	3106	tags=31%, list=16%, signal=37%
												780	GOBP_REGULATION_OF_VACUOLE_ORGANIZATION	55	-0.42	-1.2	0.149	0.741	1	9347	tags=71%, list=49%, signal=138%
												781	GOBP_POSITIVE_REGULATION_OF_TELOMERE_MAINTENANCE_VIA_TELOMERE_LENGTHENING	36	-0.44	-1.2	0.166	0.741	1	8472	tags=64%, list=44%, signal=114%
												782	GOBP_REGULATION_OF_INTRACELLULAR_PROTEIN_TRANSPORT	225	-0.38	-1.2	0.034	0.741	1	7553	tags=50%, list=39%, signal=82%
												783	GOBP_POSITIVE_REGULATION_OF_LIPID_METABOLIC_PROCESS	165	-0.39	-1.2	0.05	0.745	1	4826	tags=35%, list=25%, signal=47%
												784	GOBP_PROTEIN_AUTOPROCESSING	26	-0.45	-1.2	0.189	0.744	1	3048	tags=38%, list=16%, signal=46%
												785	GOBP_NEGATIVE_REGULATION_OF_COLD_INDUCED_THERMOGENESIS	46	-0.43	-1.2	0.153	0.744	1	7362	tags=57%, list=38%, signal=92%
												786	GOBP_IRE1_MEDIATED_UNFOLDED_PROTEIN_RESPONSE	15	-0.51	-1.2	0.208	0.745	1	8478	tags=80%, list=44%, signal=143%
												787	GOBP_REGULATION_OF_ACTION_POTENTIAL	69	-0.4	-1.2	0.13	0.745	1	8028	tags=54%, list=42%, signal=92%
												788	GOBP_REGULATION_OF_MICROTUBULE_POLYMERIZATION_OR_DEPOLYMERIZATION	92	-0.4	-1.2	0.097	0.746	1	8035	tags=59%, list=42%, signal=101%
												789	GOBP_PURINE_NUCLEOTIDE_TRANSPORT	31	-0.45	-1.2	0.177	0.745	1	6447	tags=52%, list=34%, signal=78%
												790	GOBP_NUCLEOTIDE_TRANSPORT	36	-0.43	-1.2	0.179	0.747	1	6447	tags=50%, list=34%, signal=75%
												791	GOBP_POSITIVE_REGULATION_OF_SMOOTH_MUSCLE_CELL_DIFFERENTIATION	15	-0.51	-1.2	0.195	0.747	1	4439	tags=47%, list=23%, signal=61%
												792	GOBP_POSITIVE_REGULATION_OF_INTERLEUKIN_10_PRODUCTION	43	-0.43	-1.2	0.191	0.753	1	3281	tags=26%, list=17%, signal=31%
												793	GOBP_PROTEIN_MODIFICATION_BY_SMALL_PROTEIN_REMOVAL	122	-0.38	-1.2	0.093	0.753	1	5637	tags=39%, list=29%, signal=55%
												794	GOBP_NEGATIVE_REGULATION_OF_CELL_GROWTH	199	-0.38	-1.2	0.046	0.753	1	8829	tags=59%, list=46%, signal=109%
												795	GOBP_APPENDAGE_DEVELOPMENT	208	-0.38	-1.2	0.035	0.752	1	7677	tags=52%, list=40%, signal=86%
												796	GOBP_LOCOMOTION_INVOLVED_IN_LOCOMOTORY_BEHAVIOR	16	-0.49	-1.2	0.205	0.753	1	6931	tags=69%, list=36%, signal=108%
												797	GOBP_POSITIVE_REGULATION_OF_VASCULAR_PERMEABILITY	21	-0.48	-1.2	0.193	0.753	1	4731	tags=52%, list=25%, signal=69%
												798	GOBP_RETINA_VASCULATURE_DEVELOPMENT_IN_CAMERA_TYPE_EYE	25	-0.47	-1.2	0.177	0.756	1	7506	tags=60%, list=39%, signal=98%
												799	GOBP_REGULATION_OF_MYELOID_CELL_APOPTOTIC_PROCESS	38	-0.43	-1.2	0.18	0.755	1	5368	tags=39%, list=28%, signal=55%
												800	GOBP_PEROXISOME_ORGANIZATION	38	-0.43	-1.2	0.17	0.754	1	4022	tags=39%, list=21%, signal=50%
												801	GOBP_CIRCADIAN_SLEEP_WAKE_CYCLE_PROCESS	33	-0.43	-1.2	0.174	0.753	1	1903	tags=21%, list=10%, signal=24%
												802	GOBP_NEUTRAL_LIPID_BIOSYNTHETIC_PROCESS	54	-0.42	-1.2	0.17	0.754	1	3677	tags=33%, list=19%, signal=41%
												803	GOBP_RESPONSE_TO_HISTAMINE	16	-0.5	-1.2	0.204	0.754	1	4400	tags=38%, list=23%, signal=49%
												804	GOBP_DNA_INTEGRITY_CHECKPOINT_SIGNALING	125	-0.39	-1.2	0.078	0.753	1	7452	tags=52%, list=39%, signal=84%
												805	GOBP_CORTICOSTEROID_HORMONE_SECRETION	22	-0.47	-1.2	0.214	0.752	1	6143	tags=50%, list=32%, signal=73%
												806	GOBP_EPITHELIAL_CELL_MORPHOGENESIS	46	-0.42	-1.2	0.191	0.755	1	5103	tags=43%, list=27%, signal=59%
												807	GOBP_CARDIAC_ATRIUM_DEVELOPMENT	41	-0.43	-1.2	0.181	0.758	1	6035	tags=49%, list=31%, signal=71%
												808	GOBP_PYRIMIDINE_NUCLEOSIDE_MONOPHOSPHATE_METABOLIC_PROCESS	22	-0.47	-1.2	0.221	0.759	1	5822	tags=50%, list=30%, signal=72%
												809	GOBP_RAB_PROTEIN_SIGNAL_TRANSDUCTION	18	-0.48	-1.19	0.202	0.76	1	3151	tags=39%, list=16%, signal=46%
												810	GOBP_NEGATIVE_REGULATION_OF_ALPHA_BETA_T_CELL_ACTIVATION	46	-0.43	-1.19	0.166	0.761	1	1769	tags=22%, list=9%, signal=24%
												811	GOBP_POSITIVE_REGULATION_OF_VIRAL_LIFE_CYCLE	26	-0.46	-1.19	0.209	0.76	1	5965	tags=46%, list=31%, signal=67%
												812	GOBP_RECEPTOR_INTERNALIZATION	146	-0.38	-1.19	0.072	0.759	1	4900	tags=33%, list=26%, signal=44%
												813	GOBP_DIACYLGLYCEROL_METABOLIC_PROCESS	26	-0.45	-1.19	0.222	0.759	1	3279	tags=42%, list=17%, signal=51%
												814	GOBP_LYSOSOMAL_TRANSPORT	124	-0.39	-1.19	0.087	0.759	1	9350	tags=65%, list=49%, signal=127%
												815	GOBP_MITOCHONDRION_MORPHOGENESIS	26	-0.46	-1.19	0.2	0.758	1	7690	tags=62%, list=40%, signal=103%
												816	GOBP_ALDITOL_METABOLIC_PROCESS	25	-0.46	-1.19	0.209	0.759	1	5585	tags=44%, list=29%, signal=62%
												817	GOBP_POSITIVE_REGULATION_OF_CALCIUM_ION_TRANSMEMBRANE_TRANSPORT	102	-0.39	-1.19	0.119	0.761	1	7470	tags=52%, list=39%, signal=85%
												818	GOBP_REGULATION_OF_ATP_BIOSYNTHETIC_PROCESS	23	-0.47	-1.19	0.21	0.76	1	3281	tags=35%, list=17%, signal=42%
												819	GOBP_G1_TO_G0_TRANSITION	18	-0.48	-1.19	0.218	0.762	1	4601	tags=39%, list=24%, signal=51%
												820	GOBP_MULTICELLULAR_ORGANISMAL_LEVEL_CHEMICAL_HOMEOSTASIS	82	-0.4	-1.19	0.13	0.761	1	5773	tags=41%, list=30%, signal=59%
												821	GOBP_REGULATION_OF_GONAD_DEVELOPMENT	18	-0.49	-1.19	0.226	0.761	1	8787	tags=56%, list=46%, signal=102%
												822	GOBP_VACUOLAR_TRANSPORT	160	-0.38	-1.19	0.081	0.761	1	9353	tags=64%, list=49%, signal=125%
												823	GOBP_NEGATIVE_REGULATION_OF_INTRACELLULAR_ESTROGEN_RECEPTOR_SIGNALING_PATHWAY	15	-0.5	-1.19	0.229	0.76	1	6805	tags=67%, list=35%, signal=103%
												824	GOBP_PROTEIN_LIPID_COMPLEX_ASSEMBLY	24	-0.46	-1.19	0.209	0.76	1	1106	tags=21%, list=6%, signal=22%
												825	GOBP_NEGATIVE_REGULATION_OF_CARDIAC_MUSCLE_TISSUE_GROWTH	30	-0.44	-1.19	0.196	0.759	1	6454	tags=47%, list=34%, signal=70%
												826	GOBP_POSITIVE_REGULATION_OF_MITOCHONDRION_ORGANIZATION	76	-0.4	-1.19	0.147	0.759	1	5193	tags=38%, list=27%, signal=52%
												827	GOBP_TUBULIN_DEACETYLATION	23	-0.46	-1.19	0.216	0.758	1	7128	tags=65%, list=37%, signal=104%
												828	GOBP_REGULATION_OF_TRANSCRIPTION_BY_RNA_POLYMERASE_I	45	-0.42	-1.19	0.175	0.759	1	8628	tags=64%, list=45%, signal=117%
												829	GOBP_REGULATION_OF_CARDIAC_MUSCLE_CELL_ACTION_POTENTIAL	26	-0.45	-1.19	0.224	0.759	1	4793	tags=38%, list=25%, signal=51%
												830	GOBP_CANONICAL_WNT_SIGNALING_PATHWAY	299	-0.37	-1.19	0.028	0.758	1	9323	tags=64%, list=49%, signal=122%
												831	GOBP_CELLULAR_RESPONSE_TO_LIGHT_STIMULUS	114	-0.39	-1.19	0.107	0.758	1	7205	tags=46%, list=38%, signal=73%
												832	GOBP_CYTOPLASMIC_TRANSLATION	134	-0.38	-1.19	0.082	0.758	1	6556	tags=46%, list=34%, signal=69%
												833	GOBP_NEGATIVE_REGULATION_OF_BLOOD_VESSEL_ENDOTHELIAL_CELL_MIGRATION	36	-0.44	-1.19	0.184	0.758	1	6344	tags=50%, list=33%, signal=75%
												834	GOBP_FEMALE_MEIOTIC_NUCLEAR_DIVISION	44	-0.42	-1.19	0.168	0.759	1	2199	tags=25%, list=11%, signal=28%
												835	GOBP_FORMATION_OF_PRIMARY_GERM_LAYER	107	-0.39	-1.19	0.099	0.759	1	7694	tags=54%, list=40%, signal=90%
												836	GOBP_REGULATION_OF_ANTIGEN_PROCESSING_AND_PRESENTATION	21	-0.48	-1.19	0.21	0.759	1	1373	tags=24%, list=7%, signal=26%
												837	GOBP_SKELETAL_MUSCLE_TISSUE_REGENERATION	47	-0.42	-1.19	0.166	0.759	1	8752	tags=62%, list=46%, signal=113%
												838	GOBP_PORPHYRIN_CONTAINING_COMPOUND_METABOLIC_PROCESS	43	-0.42	-1.19	0.185	0.758	1	4281	tags=42%, list=22%, signal=54%
												839	GOBP_REGULATION_OF_PEPTIDYL_SERINE_PHOSPHORYLATION	134	-0.38	-1.19	0.085	0.757	1	4227	tags=32%, list=22%, signal=41%
												840	GOBP_TRANSLESION_SYNTHESIS	20	-0.47	-1.19	0.207	0.757	1	6699	tags=55%, list=35%, signal=84%
												841	GOBP_GLUTAMINE_FAMILY_AMINO_ACID_CATABOLIC_PROCESS	22	-0.46	-1.19	0.219	0.759	1	4001	tags=41%, list=21%, signal=52%
												842	GOBP_AMINE_METABOLIC_PROCESS	124	-0.39	-1.19	0.101	0.758	1	6144	tags=40%, list=32%, signal=58%
												843	GOBP_REGULATION_OF_UBIQUITIN_DEPENDENT_PROTEIN_CATABOLIC_PROCESS	166	-0.38	-1.19	0.06	0.757	1	9425	tags=69%, list=49%, signal=134%
												844	GOBP_INTERSTRAND_CROSS_LINK_REPAIR	30	-0.44	-1.19	0.201	0.758	1	7170	tags=57%, list=37%, signal=90%
												845	GOBP_RETINOIC_ACID_METABOLIC_PROCESS	29	-0.45	-1.19	0.213	0.757	1	1138	tags=24%, list=6%, signal=26%
												846	GOBP_CHLORIDE_TRANSMEMBRANE_TRANSPORT	66	-0.4	-1.19	0.155	0.757	1	4400	tags=35%, list=23%, signal=45%
												847	GOBP_DICARBOXYLIC_ACID_CATABOLIC_PROCESS	16	-0.49	-1.19	0.221	0.757	1	7897	tags=69%, list=41%, signal=117%
												848	GOBP_CARDIAC_EPITHELIAL_TO_MESENCHYMAL_TRANSITION	36	-0.43	-1.19	0.196	0.757	1	8706	tags=75%, list=45%, signal=137%
												849	GOBP_NEGATIVE_REGULATION_OF_BINDING	159	-0.38	-1.19	0.083	0.757	1	6701	tags=45%, list=35%, signal=69%
												850	GOBP_NEGATIVE_REGULATION_OF_TUMOR_NECROSIS_FACTOR_SUPERFAMILY_CYTOKINE_PRODUCTION	65	-0.4	-1.19	0.157	0.756	1	3473	tags=28%, list=18%, signal=34%
												851	GOBP_RESPONSE_TO_PROGESTERONE	20	-0.48	-1.19	0.218	0.755	1	1888	tags=25%, list=10%, signal=28%
												852	GOBP_REGULATION_OF_LIPID_KINASE_ACTIVITY	38	-0.43	-1.19	0.197	0.756	1	5771	tags=42%, list=30%, signal=60%
												853	GOBP_REGULATION_OF_REACTIVE_OXYGEN_SPECIES_BIOSYNTHETIC_PROCESS	50	-0.41	-1.19	0.191	0.758	1	3562	tags=30%, list=19%, signal=37%
												854	GOBP_POSITIVE_REGULATION_OF_SMOOTHENED_SIGNALING_PATHWAY	44	-0.42	-1.19	0.169	0.758	1	4976	tags=36%, list=26%, signal=49%
												855	GOBP_VESICLE_TRANSPORT_ALONG_MICROTUBULE	47	-0.42	-1.19	0.199	0.758	1	8973	tags=68%, list=47%, signal=128%
												856	GOBP_REGULATION_OF_LEUKOCYTE_DEGRANULATION	52	-0.41	-1.19	0.175	0.758	1	1991	tags=25%, list=10%, signal=28%
												857	GOBP_DICARBOXYLIC_ACID_METABOLIC_PROCESS	92	-0.39	-1.19	0.131	0.757	1	7419	tags=49%, list=39%, signal=79%
												858	GOBP_CARDIAC_SEPTUM_DEVELOPMENT	127	-0.38	-1.19	0.099	0.757	1	7812	tags=52%, list=41%, signal=87%
												859	GOBP_INTERLEUKIN_13_PRODUCTION	27	-0.45	-1.19	0.203	0.756	1	2755	tags=30%, list=14%, signal=35%
												860	GOBP_REGULATION_OF_ACTIN_NUCLEATION	38	-0.42	-1.19	0.209	0.755	1	7214	tags=50%, list=38%, signal=80%
												861	GOBP_NEGATIVE_REGULATION_OF_VASCULATURE_DEVELOPMENT	109	-0.38	-1.19	0.11	0.755	1	6196	tags=44%, list=32%, signal=65%
												862	GOBP_INTESTINAL_EPITHELIAL_CELL_DIFFERENTIATION	28	-0.45	-1.19	0.199	0.754	1	6251	tags=54%, list=33%, signal=79%
												863	GOBP_LAMELLIPODIUM_MORPHOGENESIS	16	-0.49	-1.19	0.218	0.755	1	6251	tags=50%, list=33%, signal=74%
												864	GOBP_APOPTOTIC_DNA_FRAGMENTATION	20	-0.47	-1.19	0.228	0.755	1	4040	tags=45%, list=21%, signal=57%
												865	GOBP_REGULATION_OF_HEMATOPOIETIC_PROGENITOR_CELL_DIFFERENTIATION	42	-0.42	-1.19	0.181	0.754	1	7560	tags=60%, list=39%, signal=98%
												866	GOBP_NEGATIVE_REGULATION_OF_T_CELL_MEDIATED_IMMUNITY	22	-0.47	-1.19	0.231	0.754	1	3473	tags=27%, list=18%, signal=33%
												867	GOBP_POSITIVE_REGULATION_OF_EPITHELIAL_CELL_PROLIFERATION	226	-0.38	-1.19	0.05	0.754	1	4032	tags=29%, list=21%, signal=36%
												868	GOBP_REGULATION_OF_SODIUM_ION_TRANSPORT	100	-0.39	-1.19	0.112	0.755	1	8064	tags=51%, list=42%, signal=88%
												869	GOBP_NEGATIVE_REGULATION_OF_OLIGODENDROCYTE_DIFFERENTIATION	18	-0.48	-1.19	0.235	0.758	1	5906	tags=50%, list=31%, signal=72%
												870	GOBP_NUCLEOSIDE_MONOPHOSPHATE_BIOSYNTHETIC_PROCESS	43	-0.42	-1.19	0.197	0.758	1	7871	tags=60%, list=41%, signal=102%
												871	GOBP_MITOCHONDRIAL_FISSION	48	-0.42	-1.19	0.19	0.759	1	4547	tags=38%, list=24%, signal=49%
												872	GOBP_PROTEIN_K48_LINKED_UBIQUITINATION	68	-0.4	-1.19	0.148	0.759	1	6818	tags=46%, list=36%, signal=70%
												873	GOBP_TRIGLYCERIDE_METABOLIC_PROCESS	110	-0.39	-1.19	0.107	0.759	1	3279	tags=29%, list=17%, signal=35%
												874	GOBP_SPINAL_CORD_MOTOR_NEURON_DIFFERENTIATION	37	-0.43	-1.18	0.196	0.76	1	5956	tags=30%, list=31%, signal=43%
												875	GOBP_NEGATIVE_REGULATION_OF_RELEASE_OF_CYTOCHROME_C_FROM_MITOCHONDRIA	22	-0.46	-1.18	0.23	0.76	1	4871	tags=41%, list=25%, signal=55%
												876	GOBP_VENTRICULAR_TRABECULA_MYOCARDIUM_MORPHOGENESIS	17	-0.48	-1.18	0.247	0.76	1	6035	tags=59%, list=31%, signal=86%
												877	GOBP_NEGATIVE_REGULATION_OF_EXTRINSIC_APOPTOTIC_SIGNALING_PATHWAY_VIA_DEATH_DOMAIN_RECEPTORS	27	-0.45	-1.18	0.207	0.761	1	5665	tags=48%, list=30%, signal=68%
												878	GOBP_CENTROSOME_DUPLICATION	72	-0.4	-1.18	0.151	0.761	1	4865	tags=43%, list=25%, signal=57%
												879	GOBP_SMOOTHENED_SIGNALING_PATHWAY_INVOLVED_IN_DORSAL_VENTRAL_NEURAL_TUBE_PATTERNING	16	-0.49	-1.18	0.231	0.762	1	5142	tags=50%, list=27%, signal=68%
												880	GOBP_INTRINSIC_APOPTOTIC_SIGNALING_PATHWAY_IN_RESPONSE_TO_OXIDATIVE_STRESS	58	-0.41	-1.18	0.182	0.763	1	5603	tags=47%, list=29%, signal=66%
												881	GOBP_NEGATIVE_REGULATION_OF_LEUKOCYTE_MEDIATED_IMMUNITY	71	-0.4	-1.18	0.156	0.762	1	2642	tags=25%, list=14%, signal=29%
												882	GOBP_RESPONSE_TO_DECREASED_OXYGEN_LEVELS	237	-0.37	-1.18	0.041	0.762	1	6050	tags=42%, list=32%, signal=61%
												883	GOBP_MUSCLE_CELL_PROLIFERATION	266	-0.37	-1.18	0.034	0.761	1	6659	tags=47%, list=35%, signal=70%
												884	GOBP_POSITIVE_REGULATION_OF_CATION_TRANSMEMBRANE_TRANSPORT	168	-0.38	-1.18	0.078	0.762	1	7470	tags=49%, list=39%, signal=80%
												885	GOBP_RESPONSE_TO_FLUID_SHEAR_STRESS	24	-0.46	-1.18	0.199	0.762	1	7350	tags=54%, list=38%, signal=88%
												886	GOBP_REGULATION_OF_HEART_GROWTH	84	-0.39	-1.18	0.154	0.762	1	6158	tags=43%, list=32%, signal=63%
												887	GOBP_REGULATION_OF_EXECUTION_PHASE_OF_APOPTOSIS	18	-0.48	-1.18	0.247	0.762	1	6472	tags=56%, list=34%, signal=84%
												888	GOBP_CELL_CYCLE_DNA_REPLICATION	41	-0.42	-1.18	0.207	0.761	1	7339	tags=63%, list=38%, signal=103%
												889	GOBP_ADENYLATE_CYCLASE_ACTIVATING_ADRENERGIC_RECEPTOR_SIGNALING_PATHWAY	25	-0.46	-1.18	0.197	0.76	1	5108	tags=44%, list=27%, signal=60%
												890	GOBP_REGULATION_OF_NUCLEOCYTOPLASMIC_TRANSPORT	131	-0.38	-1.18	0.108	0.76	1	7429	tags=49%, list=39%, signal=79%
												891	GOBP_MYELOID_CELL_APOPTOTIC_PROCESS	45	-0.42	-1.18	0.176	0.76	1	5368	tags=38%, list=28%, signal=52%
												892	GOBP_PROTEIN_METHYLATION	101	-0.39	-1.18	0.118	0.762	1	8492	tags=61%, list=44%, signal=110%
												893	GOBP_LIPID_DROPLET_ORGANIZATION	36	-0.43	-1.18	0.209	0.762	1	6557	tags=56%, list=34%, signal=84%
												894	GOBP_POSITIVE_REGULATION_OF_INTRACELLULAR_TRANSPORT	188	-0.37	-1.18	0.065	0.762	1	7553	tags=51%, list=39%, signal=83%
												895	GOBP_CELLULAR_RESPONSE_TO_INTERFERON_ALPHA	16	-0.49	-1.18	0.249	0.765	1	6153	tags=50%, list=32%, signal=74%
												896	GOBP_POLY_A_PLUS_MRNA_EXPORT_FROM_NUCLEUS	24	-0.45	-1.18	0.231	0.764	1	5059	tags=50%, list=26%, signal=68%
												897	GOBP_RESPONSE_TO_TOPOLOGICALLY_INCORRECT_PROTEIN	133	-0.38	-1.18	0.093	0.768	1	8560	tags=59%, list=45%, signal=105%
												898	GOBP_ENERGY_HOMEOSTASIS	97	-0.39	-1.18	0.137	0.767	1	6574	tags=45%, list=34%, signal=69%
												899	GOBP_BLOOD_VESSEL_REMODELING	61	-0.4	-1.18	0.172	0.767	1	3039	tags=30%, list=16%, signal=35%
												900	GOBP_POSITIVE_REGULATION_OF_MYOBLAST_FUSION	18	-0.48	-1.18	0.237	0.767	1	3048	tags=39%, list=16%, signal=46%
												901	GOBP_NEGATIVE_REGULATION_OF_DNA_BINDING_TRANSCRIPTION_FACTOR_ACTIVITY	167	-0.37	-1.18	0.077	0.767	1	6614	tags=43%, list=34%, signal=65%
												902	GOBP_PROTEIN_O_LINKED_GLYCOSYLATION	80	-0.39	-1.18	0.152	0.767	1	7837	tags=55%, list=41%, signal=93%
												903	GOBP_AMINOGLYCAN_METABOLIC_PROCESS	112	-0.39	-1.18	0.113	0.767	1	7473	tags=51%, list=39%, signal=83%
												904	GOBP_ORGANIC_ACID_TRANSMEMBRANE_TRANSPORT	142	-0.38	-1.18	0.086	0.766	1	3628	tags=29%, list=19%, signal=35%
												905	GOBP_MAGNESIUM_ION_TRANSPORT	17	-0.49	-1.18	0.234	0.77	1	9473	tags=82%, list=49%, signal=163%
												906	GOBP_FATTY_ACID_BIOSYNTHETIC_PROCESS	152	-0.38	-1.18	0.094	0.772	1	7497	tags=51%, list=39%, signal=83%
												907	GOBP_WHITE_FAT_CELL_DIFFERENTIATION	22	-0.46	-1.18	0.239	0.773	1	8992	tags=82%, list=47%, signal=154%
												908	GOBP_REGULATION_OF_TELOMERE_MAINTENANCE_VIA_TELOMERE_LENGTHENING	58	-0.41	-1.18	0.18	0.774	1	8502	tags=59%, list=44%, signal=105%
												909	GOBP_QUATERNARY_AMMONIUM_GROUP_TRANSPORT	32	-0.44	-1.18	0.22	0.774	1	3744	tags=38%, list=20%, signal=47%
												910	GOBP_MITOTIC_CYTOKINETIC_PROCESS	24	-0.45	-1.18	0.235	0.774	1	3619	tags=38%, list=19%, signal=46%
												911	GOBP_BIOLOGICAL_PROCESS_INVOLVED_IN_INTERACTION_WITH_HOST	142	-0.38	-1.18	0.104	0.774	1	6211	tags=46%, list=32%, signal=67%
												912	GOBP_HEART_PROCESS	246	-0.37	-1.18	0.04	0.774	1	5887	tags=38%, list=31%, signal=54%
												913	GOBP_ENDOSOMAL_TRANSPORT	235	-0.37	-1.18	0.054	0.773	1	8719	tags=62%, list=45%, signal=113%
												914	GOBP_RESPONSE_TO_UNFOLDED_PROTEIN	111	-0.38	-1.18	0.127	0.775	1	8560	tags=59%, list=45%, signal=107%
												915	GOBP_DNA_BIOSYNTHETIC_PROCESS	180	-0.37	-1.18	0.083	0.778	1	6736	tags=46%, list=35%, signal=70%
												916	GOBP_REGULATION_OF_GENERATION_OF_PRECURSOR_METABOLITES_AND_ENERGY	154	-0.38	-1.18	0.093	0.778	1	7204	tags=48%, list=38%, signal=76%
												917	GOBP_STRIATED_MUSCLE_CELL_DEVELOPMENT	74	-0.4	-1.18	0.163	0.779	1	6765	tags=46%, list=35%, signal=71%
												918	GOBP_POSITIVE_REGULATION_OF_OXIDOREDUCTASE_ACTIVITY	52	-0.41	-1.18	0.198	0.779	1	2888	tags=25%, list=15%, signal=29%
												919	GOBP_NEGATIVE_REGULATION_OF_CYSTEINE_TYPE_ENDOPEPTIDASE_ACTIVITY	84	-0.39	-1.17	0.154	0.779	1	6559	tags=46%, list=34%, signal=70%
												920	GOBP_REGULATION_OF_LEUKOCYTE_TETHERING_OR_ROLLING	20	-0.47	-1.17	0.26	0.778	1	1505	tags=25%, list=8%, signal=27%
												921	GOBP_NEURON_PROJECTION_EXTENSION_INVOLVED_IN_NEURON_PROJECTION_GUIDANCE	37	-0.42	-1.17	0.214	0.777	1	8787	tags=68%, list=46%, signal=124%
												922	GOBP_POST_EMBRYONIC_DEVELOPMENT	127	-0.38	-1.17	0.103	0.777	1	7506	tags=51%, list=39%, signal=84%
												923	GOBP_VASCULAR_TRANSPORT	21	-0.47	-1.17	0.23	0.777	1	7812	tags=67%, list=41%, signal=112%
												924	GOBP_NEGATIVE_REGULATION_OF_ENDOTHELIAL_CELL_MIGRATION	56	-0.41	-1.17	0.201	0.776	1	7622	tags=55%, list=40%, signal=92%
												925	GOBP_NEGATIVE_REGULATION_OF_SUPRAMOLECULAR_FIBER_ORGANIZATION	176	-0.37	-1.17	0.073	0.776	1	6606	tags=45%, list=34%, signal=68%
												926	GOBP_EXPORT_ACROSS_PLASMA_MEMBRANE	67	-0.4	-1.17	0.167	0.777	1	6548	tags=42%, list=34%, signal=63%
												927	GOBP_ENTRAINMENT_OF_CIRCADIAN_CLOCK	26	-0.45	-1.17	0.21	0.777	1	4098	tags=31%, list=21%, signal=39%
												928	GOBP_POSITIVE_REGULATION_OF_SMALL_MOLECULE_METABOLIC_PROCESS	172	-0.37	-1.17	0.087	0.776	1	7401	tags=49%, list=39%, signal=80%
												929	GOBP_SPINAL_CORD_DEVELOPMENT	102	-0.39	-1.17	0.132	0.776	1	6111	tags=37%, list=32%, signal=54%
												930	GOBP_POSITIVE_REGULATION_OF_PROTEIN_CONTAINING_COMPLEX_DISASSEMBLY	36	-0.43	-1.17	0.217	0.776	1	5116	tags=39%, list=27%, signal=53%
												931	GOBP_CARDIOCYTE_DIFFERENTIATION	189	-0.37	-1.17	0.072	0.776	1	5887	tags=40%, list=31%, signal=57%
												932	GOBP_POSITIVE_REGULATION_OF_STEM_CELL_PROLIFERATION	58	-0.4	-1.17	0.191	0.776	1	5419	tags=40%, list=28%, signal=55%
												933	GOBP_ATRIAL_SEPTUM_DEVELOPMENT	24	-0.45	-1.17	0.226	0.775	1	5902	tags=46%, list=31%, signal=66%
												934	GOBP_DEOXYRIBONUCLEOTIDE_CATABOLIC_PROCESS	27	-0.44	-1.17	0.231	0.775	1	6277	tags=59%, list=33%, signal=88%
												935	GOBP_RNA_CATABOLIC_PROCESS	280	-0.37	-1.17	0.043	0.774	1	8241	tags=53%, list=43%, signal=92%
												936	GOBP_RETICULOPHAGY	17	-0.48	-1.17	0.246	0.774	1	8026	tags=76%, list=42%, signal=131%
												937	GOBP_STRIATED_MUSCLE_TISSUE_DEVELOPMENT	289	-0.37	-1.17	0.041	0.776	1	5902	tags=39%, list=31%, signal=56%
												938	GOBP_FEAR_RESPONSE	63	-0.4	-1.17	0.178	0.776	1	8452	tags=59%, list=44%, signal=105%
[truncated: 3,115 more rows]

## Sheet: Striatum
		Enriched in ASO samples											Enriched in Control samples
[truncated: 2,301 more rows]

## Sheet: Ventral Midbrain
		Enriched in ASO samples											Enriched in Control samples
[truncated: 3,473 more rows]
